# Supplementary material for: OrthoList: A Compendium of C. elegans Genes with Human Orthologs
Source: PLoS One. 2011 May 25;6(5):e20085. doi: 10.1371/journal.pone.0020085 (PMC3102077; doi:10.1371/journal.pone.0020085)
Supplement: Table S5 — Analysis conserved signal transduction pathways. A) RTK/Ras/MAPK. B) Notch. C) TGF-ß. D) Wnt. E) Insulin. (XLS) [file pone.0020085.s005.xls]

## Sheet: A) RTK
Core EGF/FGF-Ras-MAPK signaling pathways (see Sundaram, 2006)
Role	Gene	Sequence	Closest human homolog(s)	Detected by orthology program(s)
Ligand	lin-3	F36H1.4	N.F.							InParanoid
	egl-17	F38G1.2	(FGF17, FGF8, FGF18)•							OrthoMCL
	let-756	C05D11.4	Multiple FGFs (see TreeFam TF317805)•							Ensembl Compara
Receptor	let-23	ZK1067.1	(ERBB3, ERBB2, ERBB4, EGFR)•							HomoloGene
	egl-15	F58A3.2	(FGFR4, FGFR3, FGFR1, FGFR2)•
Adaptor	sem-5	C14F5.5	GRB2, (GRAP, GRAP2)•						‡by curated TreeFam
Ras-GEF	sos-1	T28F12.3	(SOS1, SOS2)•						•by automatic TreeFam
Ras-GTPase	let-60	ZK792.6	(KRAS, NRAS, HRAS)•						¶by one-way BLASTP
	ras-1	C44C11.1	RRAS•, §						N.F.: No human homolog found by BLASTP
	ras-2	F17C8.4	MRAS•, §
Raf-Kinase	lin-45	Y73B6A.5	BRAF, (ARAF, CRAF)•						§ No phenotypes have yet been associated with loss of either of these Ras homologs in C. elegans
Scaffold	ksr-1	F13B9.5	(KSR1, KSR2)•
	ksr-2	F58D5.4	(KSR1, KSR2)•
MAP kinase kinase	mek-2	Y54E10BL.6	(MAPKK1, MAPKK2)•
MAP kinase	mpk-1	F43C1.2	(MAPK1, MAPK3)‡
	Genes in bold are in OrthoLIst

## Sheet: B) Notch
Core Notch signaling pathway (see Greenwald, 2005)
Role	Gene	Sequence	Closest human homolog(s)	Detected by orthology program(s)
Ligand	lag-2	Y73C8B.4	JAG1¶							InParanoid
	apx-1	K08D9.3	(DLK2, DLK1)•							OrthoMCL
	arg-1	F31A9.3	NOTCH2NL•							Ensembl Compara
	dsl-1	W09G12.4	N.F.							HomoloGene
	dsl-2	W09G12.1	DLK2¶
	dsl-3	Y41D4B.10	N.F.						‡by curated TreeFam
	dsl-4	F16B12.2	DLL1¶						•by automatic TreeFam
	dsl-5	F58B3.8	SLIT2¶						¶by one-way BLASTP
	dsl-6	H02I12.4	FAT1¶						N.F.: No human homolog found by BLASTP
	dsl-7	F15B9.9	DLK2¶
Receptor	glp-1	F02A9.6	(NOTCH4, NOTCH3, NOTCH1, NOTCH2)•						§ Note that sel-8 is functionally analogous to mammalian MAML, but not related by sequence (see Greenwald, 2005)
	lin-12	R107.8
Site 2 cleavage	sup-17	DY3.7	ADAM10•
	adm-4	ZK154.7	ADAM17•
Site 3 cleavage	hop-1	C18E3.8	PSEN1¶
	sel-12	F35H12.3	(PSEN2, PSEN1)•
	aph-1	VF36H2L.1	(APH1A, APH1B)•
	aph-2	ZC434.6	NCSTN•
	pen-2	T28D6.9	PSENEN•
Nuclear complex	lag-1	K08B4.1	CBF1/RBP-J•
	sel-8	C32A3.1	N.F.§
	Genes in bold are found in OrthoLIst

## Sheet: C) TGF-ß Pathway
Core TGF-ß signaling pathway (see Savage-Dunn, 2005)
Role	Gene	Sequence	Closest human homolog(s)	Detected by orthology program(s)
Ligand	daf-7	B0412.2	GDF11•							InParanoid
	dbl-1	T25F10.2	Bmp5¶							OrthoMCL
	unc-129	C53D6.2	Bmp3b¶							Ensembl Compara
	tig-2	F39G3.8	Bmp8A•							HomoloGene
	tig-3	Y46E12BL.1	Bmp2¶
Type I receptor	daf-1	F29C4.1	TGFßR-I¶						‡by curated TreeFam
	sma-6	C32D5.2	BMPR-IB¶						•by automatic TreeFam
Type II receptor	daf-4	C05D2.1	ACTR-IIB¶						¶by one-way BLASTP
R-SMAD	daf-8	R05D11.1	SMAD9¶						N.F.: No human homolog found by BLASTP
	daf-14	F01G10.8	(SMAD6, SMAD7)•
	sma-2	ZK370.2	(SMAD3, 2, 5, 1, 9)•
	sma-3	R13F6.9	SMAD5¶
Co-SMAD	daf-3	F25E2.5	SMAD4•
	sma-4	R12B2.1	SMAD4•
I-SMAD	tag-68	F37D6.6	SMAD6¶
	Genes in bold are found in OrthoLIst

## Sheet: D) Wnt Pathway
Core Wnt signaling pathway (see Eisenmann, 2005)
Role	Gene	Sequence	Closest human homolog(s)	Detected by orthology program(s)
Ligand processing and secretion	mom-1	T07H6.2	PORCN•							InParanoid
	mig-14	R06B9.6	GPR177•							OrthoMCL
Ligand	lin-44	E01A2.3	(WNT7A,B)‡							Ensembl Compara
	egl-20	W08D2.1	(WNT7A,B)‡							HomoloGene
	mom-2	F38E1.7	WNT9‡
	cwn-1	K10B4.6	WNT4‡						‡by curated TreeFam
	cwn-2	W01B6.1	WNT5‡						•by automatic TreeFam
Receptor	lin-17	Y71F9B.5	FZD10¶						¶by one-way BLASTP
	mom-5	T23D8.1	FZD1¶						N.F.: No human homolog found by BLASTP
	mig-1	Y34D9B.1	FZD10¶
	cfz-2	F27E11.3	FZD8¶
Dishevlled-family adaptors	mig-5	T05C12.6	DVL3¶
	dsh-1	C34F11.9	DVL3¶
	dsh-2	C27A2.6	DVL2¶
Destruction Complex	pry-1	C37A5.9	(AXIN1, AXIN2)•
	axl-1	K02B12.4	N.F.
	gsk-3	Y18D10A.5	(GSK3A, GSK3B)•
	kin-19	C03C10.1	CSNK1A1•
	apr-1	K04G2.8	(APC, APC2)•
Nuclear Complex	bar-1	C54D1.6	(CTNNB1, JUP)•
	pop-1	W10C8.2	(TCF7, LEF1)•
	Genes in bold are in OrthoLIst

## Sheet: E) Insulin Pathway
Insulin Signaling (see Hu, 2005)
Role	Gene	Sequence	Closest human homolog(s)	Detected by orthology program(s)
Ligand	ins-1	F13B12.5	N.F.							InParanoid
	ins-4	ZK75.1	N.F.							OrthoMCL
	ins-6	ZK84.6	N.F.							Ensembl Compara
	ins-7	ZK1251.2	N.F.							HomoloGene
	ins-18	T28B8.2	N.F.
	daf-28	Y116F11B.1	N.F.						‡by curated TreeFam
	~34 other ins genes		N.F.						•by automatic TreeFam
Receptor	daf-2	Y55D5A.5	(INSRR/INSR/IGF1R)•						¶by one-way BLASTP
PI3K adaptor/regulatory subunit	aap-1	Y110A7A.10	(PIK3R1/2/3)‡						N.F.: No human homolog found by BLASTP
Kinase Cascade	age-1	B0334.8	PIK3CG‡
	pdk-1	H42K12.1	PDPK1‡
	akt-1	C12D8.10	(AKT1/2/3)•
	akt-2	F28H6.1	(AKT1/2/3)•
PI3K Phosphatase	daf-18	T07A9.6	PTEN•
FoxO transcription factor	daf-16	R13H8.1	(FOXO1/3/4/6)•
	Genes in bold are in OrthoLIst
