# Supplementary material for: OrthoList: A Compendium of C. elegans Genes with Human Orthologs
Source: PLoS One. 2011 May 25;6(5):e20085. doi: 10.1371/journal.pone.0020085 (PMC3102077; doi:10.1371/journal.pone.0020085)
Supplement: Table S6 — Analysis of Sönnichsen et al cell division RNAi screen. A) Screen hits updated to Wormbase WS210. B) Hits in OrthoList. C) Hits not in OrthoList. D) Assessment of orthology, based on RBH/TreeFam, for hits not in OrthoList. E) Assessment of orthology based on RBH/TreeFam, for hits in OrthoList not reported by Sönnichsen, et al, as having human homologs. (XLS) [file pone.0020085.s006.xls]

## Sheet: A) Corrections
Changed gene	Predicted by Sönnichsen, et. al to have human homolog?	Status in WS210
K06B9.3	no	Superseded, merged into K06B9.2 (a separate positive hit in this screen)
Y51A2A.10	no	Dead gene, not superseded by another.
F23F12.2	no	Dead gene, not superseded by another.
F55H2.3	no	Superseded, merged to F55H2.4 (but see below)
F55H2.4	no	Pseudogene
C15H9.10	no	Superseded, merged to C15H9.8/prx-3
B0412.5	no	Superseded, merged to F42G9.7/snt-2
W09G12.5	yes	Superseded, merged into F38A1.8 (a separate positive hit in this screen)
C01F6.3	yes	Pseudogene
Y62E10A.15	yes	Pseudogene
B0250.7	yes	Pseudogene
C41G7.3	yes	Superseded, merged to C41G7.9 (not found in screen as a separate hit)
Genes in bold were removed from comparison to OrthoList, either because they are no longer predicted genes or because new designation is found as another hit

## Sheet: B) Hits in OrthoList (570)
Sequence Name		In bold are hits that were not assigned human homologs by Sönnichsen, et. al., but have orthologs based on RBH and/or TreeFam (see Table 6E) In red are genes that do not have human ortholog based on RBH or TreeFam (see Table 6E)
C47E8.5
C02C6.1
F32D8.6
F26D10.3
T02G5.9
C12C8.3
F55A12.3
C39F7.4
T24B8.1
K11D9.2
Y113G7A.3
F12F6.6
R10E11.8
R10E11.2
C17H12.14
C03H5.2
C13B9.3
C32D5.3
E03H4.8
F21D5.7
F38E11.5
F42G9.8
F43D9.3
K02D10.5
M28.5
R12E2.10
T14G10.5
T21E3.1
T27F7.3
Y113G7B.18
Y25C1A.5
Y49A3A.2
Y53G8AR.3
Y54F10AR.1
Y57G11C.15
Y71F9AL.17
ZK970.4
B0336.2
D2045.1
Y56A3A.20
C07G2.3
C07H6.5
ZK328.1
F57B10.10
F25H5.4
T23D8.4
Y74C10AR.1
T08B2.9
T23G11.2
F43E2.8
Y73B6A.5
Y54E10BL.6
Y77E11A.13
F53A2.4
Y106G6H.2
Y76A2B.1
F56F3.1
T20H4.3
ZK675.1
F21H12.4
C32E8.8
Y45F10A.2
F53G12.1
F25H2.10
Y71F9AL.13
C03D6.8
Y106G6H.3
T01C3.6
ZC518.2
Y47G6A.12
Y116A8C.42
Y71F9B.4
B0491.2
F29F11.1
Y63D3A.5
Y38F2AL.3
F20B6.2
B0361.10
C36A4.4
C47G2.3
C49H3.8
D1014.3
F07A11.2
F08F8.2
F09E5.2
F20D12.4
F20G4.1
F21D5.1
F22B3.4
F25B4.6
F27C1.7
F27C8.6
F32H2.5
F38A1.8
F46F11.5
F49C12.12
F49C12.13
F55A11.2
F55H2.2
F57B9.2
H02I12.8
H37A05.1
K06B9.2
K10D2.6
M01A10.3
PAR2.4
R186.3
T01H3.1
T05G5.7
T05G5.9
T05H4.6
T09A5.11
T12A2.2
T21B10.7
T22D1.4
W01A11.2
W06H3.3
Y34D9A.10
Y51H7C.6
Y57G7A.10
Y6B3A.1
ZK1098.5
ZK512.5
ZK616.6
ZK686.3
T23G11.3
R06A4.4
C33H5.4
M01E11.6
C41G7.2
C06G3.2
T01G9.5
Y54E10A.9
C03G5.1
F52H2.7
F35G12.9
K06H7.6
K06A5.7
T05G5.3
Y55F3AM.15
Y67H2A.6
F10B5.6
ZK177.6
F28F8.3
Y110A7A.17
W10C6.1
C15H11.7
D1054.2
Y110A7A.14
C36B1.4
F25H2.9
CD4.6
ZK945.2
K08D12.1
C47B2.4
Y38A8.2
T20F5.2
K05C4.1
C02F5.9
F39H11.5
T22D1.9
K07D4.3
C23G10.4
C30C11.2
F10G7.8
F57B9.10
F49C12.8
R12E2.3
C52E4.4
F29G9.5
F23F12.6
F23F1.8
F56H1.4
F25B5.4
ZK1010.1
C47E12.5
F59E12.11
C09G4.3
F38H4.9
F48E8.5
ZK520.4
Y71F9AL.16
T19A5.2
T10F2.1
C10H11.9
Y51H4A.3
C34C12.3
C37A2.4
F25H5.3
F26H9.2
K09H11.3
Y17G7B.2
Y46G5A.31
Y49E10.19
Y56A3A.1
Y66H1A.2
Y75B7AL.4
W04D2.1
F26B1.3
F28B3.8
Y48G1A.5
DY3.2
K07F5.13
ZK328.5
F53F10.5
Y37E3.15
R06F6.5
T01G9.4
Y54E5A.4
F56A3.3
T19B4.2
Y41D4B.19
F59A2.1
C18E9.11
K01G5.4
C29E4.3
C26D10.1
R05D11.3
B0240.4
C34B2.10
C38D4.3
T24F1.2
Y54G2A.2
ZK546.1
C54C6.2
Y108G3AL.1
T21E12.4
T26A5.9
C39E9.14
ZK593.5
C28H8.12
F13D12.7
F08B6.2
T03F6.5
F49E11.1
ZK287.5
F26E4.8
C47B2.3
F44F4.11
K01G5.7
C36E8.5
W02D3.9
F22B5.7
C05D11.3
C17H12.1
C26B2.1
C29E4.8
F54B3.3
R151.9
T16G12.1
T24H10.6
T26A5.8
Y19D2B.1
Y47D3A.29
Y53F4B.22
Y71F9AL.14
K07C11.2
F26E4.1
F58A4.8
F59E12.2
T06G6.9
F36A4.7
K11D9.1
ZK858.4
Y79H2A.11
C08F8.1
C13F10.2
C25A1.9
F16D3.4
F44A2.3
W03A5.4
B0207.4
T27F2.3
C43E11.10
R06F6.1
Y54E10A.15
T06E6.2
Y54E2A.11
Y110A7A.1
T10C6.14
ZK131.5
ZK131.9
T10C6.13
T10C6.12
C50F4.13
F08G2.1
B0035.9
B0035.8
F54E12.5
F54E12.4
F55G1.10
F55G1.3
H02I12.7
H02I12.6
T23D8.5
T23D8.6
F45F2.4
F45F2.12
T11G6.1
C29A12.3
Y17G7B.5
C25D7.6
R10E4.4
ZK632.1
F32D1.10
M106.1
EEED8.5
K12D12.2
W03D2.4
F58A4.4
C54G10.2
T23G5.1
C03C10.3
Y49E10.1
F18E2.3
F35G12.8
C29E4.12
C29E4.2
F18A1.5
F34D10.2
F55C5.4
K12D12.1
K12D12.3
W02D9.2
Y55B1BR.3
Y71H2B.2
ZK1127.7
ZK993.1
C27A2.2
C36B1.5
C45G3.1
C53A5.3
D2024.6
F55A3.3
F55C5.8
M01F1.6
R107.6
T23H2.1
Y39G10AR.8
Y43E12A.1
Y43F4B.6
Y48E1B.5
ZC168.4
T04C12.6
T04C12.5
T04C12.4
M03F4.2
Y59A8A.1
B0025.2
F11H8.4
K08E3.6
C56G7.1
Y18D10A.20
B0464.5
R09B3.4
M03D4.1
T19E10.1
W08F4.8
F09E5.1
M117.2
F20G4.3
F54E7.3
H39E23.1
T25C8.2
T26E3.3
F10C2.4
F55G1.11
T09A5.9
Y39G10AR.14
F28B12.3
R01H10.1
Y41C4A.10
ZK742.1
C39E9.13
F31E3.3
ZK637.8
C41C4.8
F08B4.5
F19B6.2
F33G12.4
F33H2.5
F41E6.4
F44B9.8
T24C4.5
F54H12.1
F35G12.10
C34E10.6
C37H5.8
R11A8.6
T07C4.7
T23D8.1
W02D9.1
T06D8.8
C06H2.1
C15H9.8
C25H3.9
C41G7.9
C56C10.8
D2030.4
D2085.3
E04A4.5
F01F1.12
F23B12.5
F35G12.2
F42A6.6
F56D2.1
F58F12.1
F59C6.5
H06H21.3
H28O16.1
K04G7.4
R06F6.2
R53.4
T05H10.6
T09B4.9
T10E9.7
T20G5.2
T20H4.5
T22B11.5
T27E9.1
T27F7.1
W10D9.5
Y37E3.9
Y69A2AR.18
Y82E9BR.3
F28H1.3
T05C12.7
K01C8.10
F01F1.8
B0464.1
C27D11.1
R08D7.3
B0511.10
F22B5.2
ZC434.5
F22B5.9
B0348.6
T05G5.10
R74.1
C01H6.5
F22D6.3
Y41E3.4
Y37E3.7
F10B5.1
T22F3.4
JC8.3
C04F12.4
K11H12.2
M01F1.2
Y45F10D.12
C09D4.5
E04A4.8
C14B9.7
B0336.10
D1007.12
F52B5.6
F28C6.7
C53H9.1
F13B10.2
W09C5.6
F10E7.7
ZK652.4
F37C12.4
C54C6.1
C26F1.9
B0041.4
Y48B6A.2
F54C9.5
R151.3
F53G12.10
R13A5.8
B0393.1
F56F3.5
D1007.6
F40F11.1
F54E7.2
C16A3.9
F37C12.9
F36A2.6
T08B2.10
T05F1.3
C49H3.11
F37C12.11
F53A3.3
F28D1.7
F39B2.6
F56E10.4
B0412.4
C23G10.3
C26F1.4
T05E11.1
Y71A12B.1
ZC434.2
F40F8.10
F26F4.10
C52E4.3
Y49E10.15
C47E12.1
H06I04.4
Y87G2A.5
F42G9.7
C09H10.2
C37C3.2
C37H5.6
C42C1.14
C47D12.6
F11G11.13
F15D3.7
F32D1.2
F36F2.6
F54A3.3
F57B9.3
H19N07.1
M110.4
R144.2
W01D2.1
W02F12.5
Y105E8A.16
Y105E8A.19
Y24D9A.4
Y37E3.10
Y37E3.8
Y41D4B.5
Y43B11AR.4
Y48G8AL.8
Y55F3AR.3
Y71H2AM.19
Y73B3A.18
Y73B6BL.38
F32E10.4
C53D5.6
R119.4
C56C10.3
K04D7.1
C07G1.5
C09G12.9
CD4.4
E01B7.1
F23C8.6
T17E9.2
T20B12.1
C03C10.1
H15N14.2
W03C9.3
F18C12.2
T23G7.4
W08E3.1
Y53C12A.1
C10C6.6
C30F8.2
T20G5.1
Y37D8A.10
Y82E9BR.15
M7.1
F43C1.2
F45H11.2
F14B8.1
C14B9.4
Y75B8A.30
F26H9.6
ZC404.8
C08B11.1
C18E9.6
C47G2.5
F25H2.4
H38K22.2
Y18D10A.17
Y37B11A.3
Y56A3A.18
Y71H2B.3

## Sheet: C) Hits not in OrthoList (82)
Sequence Name		In bold are hits that were assigned human homologs by Sönnichsen, et. al., but are not supported by RBH or TreeFam (see Table 6D) In red are hits with human orthologs based on RBH and/or TreeFam, but not picked up by OrthoList (see Table 6D)
F36H1.4
F21D12.2
F44F4.2
F54D12.5
T25G3.2
C27A2.3
T11F8.3
C09H10.7
C31H1.8
C44B12.1
C55C3.5
E02H9.3
F57B10.14
H02I12.1
K07A12.2
K10D2.4
K10F12.6
T01B11.3
T01H3.4
Y51A2A.4
Y55H10A.1
F57B10.12
C28C12.2
F54C8.3
B0511.9
C02F5.12
Y57A10A.24
Y57E12AL.6
F31A9.2
F54C4.3
ZC204.11
H02I12.5
T08B1.6
F57B1.2
K08E7.3
F56A3.4
Y54E2A.3
B0365.7
F10E9.8
F32H2.3
F35B12.5
Y45F10D.9
F22D6.6
Y39G10AR.12
F58A4.3
T03F1.9
C02F5.1
C33D12.3
C49C8.6
F58A4.6
Y48E1B.12
C06A8.5
F54C8.2
K06A5.4
T10B5.6
W05G11.2
Y39B6A.47
Y73B3A.12
ZK1248.5
W06B11.3
C38C10.4
F22B7.13
F58B6.3
T09A5.10
C53A5.1
F23H11.5
F29B9.11
F36A2.7
F44G4.2
K07A12.5
T05H4.12
W10D5.2
ZK792.2
B0393.8
Y73B3A.10
F21H12.2
C27D9.1
T07C4.8
C45G9.5
F07A5.1
B0334.11
C39B5.2

## Sheet: D) prvsly hom. not in OL (24)
Sequence Name	Gene Name	RBH and TreeFam results	Ortholog by RBH and/or TreeFam?
F44F4.2	egg-3	one way BLASTP. Part of large nematode-specific expansion protein tyrosine phosphatase.	no
T25G3.2	chs-1	RBH BLASTP with hyaluronan synthase 3. TreeFam suggests as out-paralog of hyaluronan synthase 3.	yes
T11F8.3	rme-2	one way BLASTP. Out-paralog of LDLR in TreeFam.	no
H02I12.1	cbd-1	one way BLASTP and nematode-specific tree in TreeFam.	no
K07A12.2		one way BLASTP. TreeFam suggests is out-paralog of LRRC15.	no
T01B11.3	syn-4	one way BLASTP. Possible in-paralog of syntaxin/unc-64 in TreeFam.	yes
Y55H10A.1	vha-19	RBH BLASTP with ATP6AP1. TreeFam suggests as ortholog of ATP6AP1.	yes
T08B1.6	acs-3	one way BLASTP. TreeFam suggests as out-paralog of ACSL5.	no
F56A3.4	spd-5	RBH BLASTP with LUZP1. Nematode-specific tree in TreeFam.	yes
B0365.7		one way BLASTP. No TreeFam.	no
F10E9.8	sas-4	one way BLASTP. No TreeFam.	no
F58A4.3	hcp-3	one way BLASTP and insect-specific tree in TreeFam.	no
C02F5.1	knl-1	one way BLAST. Outdated tree in TreeFam (human protein in tree has been superseded)	no
C33D12.3	twk-26	one way BLASTP. Likely out-paralog of human KCNK18 in TreeFam	no
C06A8.5	spdl-1	one way BLASTP. No TreeFam.	no
F54C8.2	cpar-1	one way BLASTP and insect-specific tree in TreeFam (same tree as hcp-3, above)	no
Y39B6A.47	nhr-145	one way BLASTP and nematode-specific tree in TreeFam.	no
Y73B3A.12		one way BLASTP. TreeFam suggest as out-paralog of CALML3.	no
F58B6.3	par-2	No good BLASTP to human. TreeFam suggests as out-paralog of TRIM61/52/40/8 and ZNF179.	no
T09A5.10	lin-5	one way BLASTP and nematode-specific tree in TreeFam.	no
F44G4.2		RBH BLASTP with NADH-ubiquinone oxidoreductase AGGG subunit (NDUFB2). TreeFam also calls it ortholog of NDUFB2	yes
W10D5.2	nduf-7	RBH BLASTP with NADH-ubiquinone dehydrogenase iron-sulfur protein 7. TreeFam also calls it ortholog of NDUFS7	yes
Y73B3A.10		one way BLASTP. No Treefam.	no
T07C4.8	ced-9	RBH BLASTP with human BCL2L.TreeFam suggests as out-paralog of BCL2 family	yes
In bold are genes that previously were listed as having human orthologs but are not supported by RBH and/or TreeFam

## Sheet: E) prvsly no hom., in OL (19)
Sequence Name	Gene Name	Found by orthology program(s)	RBH and TreeFam results	Ortholog by RBH and/or TreeFam?
C32D5.3		4 (all)	RBH with EFR3A. TreeFam also calls it ortholog of EFR3A/B	yes
K12D12.2	npp-3	4 (all)	RBH with Nup205. TreeFam also calls it orhtolog of Nup205	yes
Y54E10A.15	cdt-1	3 (Compara, InParanoid, OrthoMCL)	RBH with CDT1. TreeFam also calls it ortholog of CDT1	yes
Y110A7A.1	hcp-6	3 (Compara, InParanoid, OrthoMCL)	RBH with NCAP3 . TreeFam also calls it ortholog of NCAP3D	yes
C15H9.8	prx-3	3 (Compara, InParanoid, OrthoMCL)	RBH with PEX3 TreeFam calls it (distant?) ortholog of PEX3	yes
F49C12.12		2 (InParanoid, OrthoMCL)	RBH with RNASEK . TreeFam also calls it ortholog of RNASEK	yes
Y48E1B.5		2 (InParanoid, OrthoMCL)	RBH with MRPL37. TreeFam also calls it ortholog of MRPL37	yes
R119.4	pqn-59	2 (Compara, InParanoid)	RBH with UBAP2. TreeFam also calls it ortholog of UBAP2/UBAP2L	yes
C29E4.2	kle-2	2 (Compara, InParanoid)	RBH with NCAPH2. TreeFam also calls it an ortholog of NCAPH2.	yes
Y18D10A.20	pfn-1	1 (OrthoMCL)	RBH with PROFILIN4. Yeast, plant and insect tree in TreeFam.	yes
C06H2.1	atp-5	1 (OrthoMCL)	RBH with ATP5. TreeFam also calls it an ortholog of ATP5.	yes
F42G9.7	snt-2	1 (OrthoMCL)	one way BLASTP. TreeFam calls it out-paralog of snt-1	no
F32D1.2		1 (OrthoMCL)	one way BLASTP. TreeFam calls it ortholog of ATP5E/ATP5EP2	yes
T26A5.8		1 (OrthoMCL)	RBH with POLE3. TreeFam also calls it an ortholog of POLE3	yes
B0491.2	sqt-1	1 (InParanoid)	one way BLASTP. Nematode-specific tree in TreeFam	no
F56A3.3	npp-6	1 (InParanoid)	RBH with Nup160. Nematode-specific tree in TreeFam	yes
F44A2.3		1 (InParanoid)	one way BLASTP. Nematode-specific tree in TreeFam	no
Y54E5A.4	npp-4	1 (Compara)	one way BLASTP. Nematode-specific tree in TreeFam	no
Y55B1BR.3		1 (Compara)	one way BLASTP. No human ortholog in TreeFam	no
In bold are genes that previously were not though to have human homologs, but now supported by RBH and/or TreeFam				14 out of 19
