# Supplementary material for: OrthoList: A Compendium of C. elegans Genes with Human Orthologs
Source: PLoS One. 2011 May 25;6(5):e20085. doi: 10.1371/journal.pone.0020085 (PMC3102077; doi:10.1371/journal.pone.0020085)
Supplement: Table S8 — Analysis of Balklava et al trafficking RNA screen. A) Screen hits updated to Wormbase WS210. B) Hits in OrthoList. C) Hits not in OrthoList. D) Assessment of orthology, based on RBH/TreeFam, for hits not in OrthoList. E) Assessment of orthology based on RBH/TreeFam, for hits in OrthoList not reported by Balklava et al as having human homologs. (XLS) [file pone.0020085.s008.xls]

## Sheet: A) Corrections
Changed model	Predicted by Balklava et. al to have human homolog?	Status in WS210
Y113G7B.21	yes	Merged to mdt-17/Y113G7B.18
F53B8.1	yes	Merged to vab-10/ZK1151.1 (a separate positive hit in this screen)
Gene in bold was removed from comparison to OrthoList, because the new prediction was found as an independent hit in the screen (duplicate)

## Sheet: B) Hits in OrthoList (205)
Sequence Name		In bold are hits that were not assigned human homologs by Balklava et. al., but have orthologs based on RBH and/or TreeFam (see Table 8E) In red are genes that do not have human ortholog based on RBH or TreeFam (see Table 8E)
E01A2.4
R06A10.2
Y110A7A.13
F46F11.5
C01G8.5
F27C1.6
T23H2.5
H15N14.2
F21C3.5
F20G4.1
F20G4.3
F07A5.7
F57B10.10
C26C6.5
F18C12.2
F43G9.10
F26H9.6
K02A11.1
C17E4.9
F25H2.4
W02B9.1
F25H2.11
ZK1151.1
C34B2.10
Y18D10A.5
C01A2.3
C01A2.5
Y6B3A.1
T26E3.3
K05C4.6
Y63D3A.5
Y48G8AL.13
Y54E10A.7
Y65B4A.3
Y65B4BR.8
Y71G12B.11
W10D9.5
W07E6.2
Y57G7A.10
H17B01.4
Y25C1A.5
Y49F6B.2
F41C3.4
F59E12.11
F09E5.1
F09E5.5
C30B5.6
ZK546.14
T09A5.9
T01H3.1
R07G3.1
M110.5
D2013.6
C06C3.1
F54B3.3
ZK970.3
ZK970.4
T19E10.1
F59E10.3
Y19D2B.1
C14A4.1
D1043.1
T01E8.3
ZC101.2
Y54G11A.10
Y53F4B.22
C29F9.7
C09F5.2
F40G9.1
H19M22.2
F30H5.1
K11D9.2
F13B10.1
C34E10.1
C34E10.2
C16C10.6
Y44F5A.1
F48E8.5
R07E5.10
B0336.6
B0280.9
F37C12.1
B0361.6
B0361.10
F57B9.5
T20B12.1
T26A5.9
T20B12.7
F11H8.4
K07D8.1
K12H4.4
ZK637.8
R08D7.1
R08D7.2
ZK686.3
R107.8
F54G8.3
PAR2.4
K02D10.5
F54F2.1
R10E11.2
K04H4.1
R10E11.8
ZK1098.7
F43D9.3
F58A4.8
Y48A6C.4
T20G5.1
T25C8.2
Y49E10.19
C24H11.7
K08E3.6
Y43F4B.6
Y37D8A.10
Y55B1BM.1
Y77E11A.13
F01G12.5
ZK180.4
E04A4.4
C17H12.14
F33D4.2
T28C6.6
F38E11.5
C01F6.8
ZK1251.9
F36H1.2
T14G10.5
K08C7.3
K07F5.14
F25H8.2
ZK792.6
B0035.11
M117.2
VZK822L.1
F28D1.10
F12F6.6
F58B3.4
C39E9.14
JC8.5
JC8.6
K09B11.9
Y57G11C.24
Y51H4A.15
Y41D4A.2
Y39B6A.14
Y39B6A.3
Y113G7A.3
Y39B6A.33
Y51A2D.15
Y113G7B.18
T28F12.3
T21H3.3
C39F7.4
Y47D7A.16
CD4.4
D1014.3
F10D2.9
C13F10.4
C37C3.3
T04C12.4
T04C12.5
T04C12.6
K07C5.1
F55A11.2
F55C5.4
F55C5.8
F25H9.6
R186.3
C14C10.4
K12F2.1
H37A05.1
F58G11.1
T01C3.1
C47E8.7
Y49A3A.2
C54D1.6
R07E4.6
F14D12.2
C54H2.5
T22E5.5
C14F5.5
B0416.5
F58A3.2
F52D10.3
ZC504.4
T05A10.5
C44H4.2
W10G6.3
C02C6.1
ZK265.6
F29A7.6
C17H12.1
T12G3.5
T22H9.1
R12E2.2
C06A5.1
Y6B3B.9
K11B4.1
C15F1.3
T21B10.1
ZK930.3
F49C12.12
F54D1.6
F40F11.2
K09A9.1

## Sheet: C) Hits not in OrthoList (62)
Sequence Name		In bold are hits that were assigned human homologs by Balklava et. al., but are not supported by RBH or TreeFam (see Table8D) In red are hits with human orthologs based on RBH and/or TreeFam, but not picked up by OrthoList (see Table 8D)
F54C1.7
F27C1.3
K04G2.3
Y39G10AR.10
F44B9.7
T11F8.3
F42C5.9
T01B11.3
W08D2.8
T09E8.1
T05A10.3
F32H2.3
Y47G6A.15
C06A8.5
F54D5.5
F26H11.1
W07B3.2
Y49E10.21
F56B3.4
Y11D7A.9
Y41D4B.11
Y110A7A.7
C10G11.4
D2030.3
F26E4.4
Y48G1C.7
Y48G1BL.5
C23H3.5
F52C6.13
C29H12.6
ZK1248.13
C27A2.3
F58F12.2
C44B7.3
B0495.6
T09A5.5
F10E7.6
C09H10.7
W06E11.2
R02F2.7
F20H11.6
K04G7.1
K12H4.5
F10E9.4
C38C10.4
Y55H10A.1
F28E10.4
F29B9.8
C01B10.11
R07H5.9
ZK792.2
ZK792.3
W02A2.1
F35E8.6
K03B4.1
B0238.11
C26F1.3
K08F9.4
T19D2.3
F18G5.2
ZK899.2
W04G3.2

## Sheet: D) prvsly hom., not in OL (21)
Sequence Name	Gene	RBH and TreeFam results	Ortholog by RBH and/or TreeFam?
F32H2.3	spd-2	No hit by BLASTP., No TreeFam	no
Y47G6A.15		one way BLASTP. No TreeFam	no
C06A8.5	spdl-1	one way BLASTP. No TreeFam	no
F54D5.5		one way BLASTP. Nematode-specific tree in TreeFam	no
F26H11.1	kbp-3	one way BLASTP. Nematode-specific tree in TreeFam	no
Y41D4B.11		one way BLASTP. Nematode-specific tree in TreeFam	no
Y11D7A.9		one way BLASTP. Out-paralog of PGAP2 ortholog (tag-189) in TreeFam	no
W07B3.2	gei-4	no hit by BLASTP. Nematode-specific tree in TreeFam	no
Y49E10.21		no hit by BLASTP. No TreeFam	no
F56B3.12	skr-18	one way BLASTP. In nematode-specific expansion in TreeFam.	no
F27C1.3		no hit by BLASTP. In nematode-specific expansion in TreeFam	no
K04G2.3	cdc-48.3	one way BLASTP. In nematode-specific tree in TreeFam	no
Y39G10AR.10	epg-2	one way BLASTP. No TreeFam	no
T09E8.1		one way BLASTP. Nematode-specific tree in TreeFam	no
T11F8.3	rme-2	one way BLASTP. Out-paralog of LDLR in TreeFam	no
T01B11.3	syx-4	one way BLASTP. Possible in-paralog of syntaxin/unc-64 in TreeFam.	yes
F54C1.7	pat-10	one way BLASTP. Out-paralog of troponin/F43C9.2 in TreeFam	no
F42C5.9		one way BLASTP. No TreeFam	no
F44B9.7	pqn-38/mdt-30	no hit by BLASTP. No TreeFam	no
T05A10.3	ttr-14	one way BLAST. Nematode-specific tree in TreeFam	no
W08D2.8	kin-21	one way BLASTP. Part of large nematode-specific expansion FER/FES kinase in TreeFam	no
In bold are genes that previously were listed as having human homologs, but are not supported by RBH and/or TreeFam

## Sheet: E) prvlsy no hom., in OL (11)
Gene Model	Name	In OrthoList?	RBH and TreeFam results	Ortholog by RBH and/or TreeFam?
ZK930.3	vab-23	3 (Compara, OrthoMCL, InParanoid)	RBH with ZC4H2. TreeFam also calls it ortholog of ZC4H2	yes
F49C12.12		2 (InParanoid and OrthoMCL)	RBH with RNASEK . TreeFam also calls it ortholog of RNASEK	yes
C06A5.1		2 (Compara and OrthoMCL)	RBH with INTS1. TreeFam also calls it ortholog of INTS1	yes
R12E2.2		2 (Compara and OrthoMCL)	RBH with C1ORF9. TreeFam also calls it ortholog of C1ORF9	yes
T21B10.1		1 (OrthoMCL)	RBH with MRPL50 . TreeFam also calls it ortholog of MRPL50	yes
C15F1.3	tra-2	1 (OrthoMCL)	one way BLASTP. Nematode-specific tree in TreeFam	no
K11B4.1		1 (InParanoid)	RBH with MRPS27. TreeFam also calls it ortholog of MRPS27	yes
F40F11.2		1 (InParanoid)	RBH with KIAA0240. No TreeFam.	yes
Y6B3B.9		1 (Compara)	RBH with LAS1L . TreeFam also calls it ortholog of LAS1L	yes
F54D1.6		1 (Compara)	one way BLASTP. Nematode-specific tree in TreeFam	no
K09A9.1	nipi-3	1 (Compara)	one way BLASTP. Nematode-specific tree in TreeFam	no
In bold are genes that previously were not though to have human homologs, but now supported by RBH and/or TreeFam				8 out of 11
