# Supplementary material for: OrthoList: A Compendium of C. elegans Genes with Human Orthologs
Source: PLoS One. 2011 May 25;6(5):e20085. doi: 10.1371/journal.pone.0020085 (PMC3102077; doi:10.1371/journal.pone.0020085)
Supplement: Table S10 — InterPro annotation of OrthoList. A) Gene-focused pivot report. B) InterPro domain-focused pivot report. C) All OrthoList genes with InterPro domains (6,951/7,633, or ∼91%), and their associated annotations. This is source data for pivot reports in Tables S10A, B. (XLS) [file pone.0020085.s010.xls]

## Sheet: A) gene-focused report
Count of Interpro Description
Gene ID	Interpro Description	Total
2RSSE.1	RhoGAP	1
4R79.1	Metridin-like ShK toxin	1
	Peptidase M12A, astacin	1
	Peptidase, metallopeptidase	1
4R79.2	MIRO-like	1
	Ran GTPase	1
	Ras	1
	Ras small GTPase, Rab type	1
	Ras small GTPase, Ras type	1
	Small GTP-binding protein	1
	Small GTPase, Rho type	1
AC3.5	Peptidase M1, membrane alanine aminopeptidase, N-terminal	1
	Peptidase S8/S53, subtilisin/kexin/sedolisin	1
AC3.6	Collagen triple helix repeat	1
	Nematode cuticle collagen, N-terminal	1
AC3.7	Glycosyl transferase, family 28, C-terminal	1
	UDP-glucuronosyl/UDP-glucosyltransferase	1
AC3.8	Glycosyl transferase, family 28, C-terminal	1
	UDP-glucuronosyl/UDP-glucosyltransferase	1
AC7.2	Leucine-rich repeat	1
	Leucine-rich repeat, typical subtype	1
AH6.2	Tricarboxylate/iron carrier	1
B0024.1	Collagen triple helix repeat	1
	Nematode cuticle collagen, N-terminal	1
B0024.11	Pseudouridine synthase TruD, conserved site	1
	Pseudouridine synthase TruD, eukaryotic	1
	Pseudouridine synthase, TruD	1
	Pseudouridine synthase, TruD, insertion domain	1
B0024.12	GCN5-related N-acetyltransferase	1
B0024.13	3-oxo-5-alpha-steroid 4-dehydrogenase, C-terminal	1
B0024.14	Insulin-like growth factor-binding protein, IGFBP	1
	Proteinase inhibitor I15, antistasin-like	1
	von Willebrand factor, type C	1
B0024.15	Glycosyl transferase, family 31	1
B0024.2	Collagen triple helix repeat	1
	Nematode cuticle collagen, N-terminal	1
B0024.8	HEAT	1
	WD40 repeat, conserved site	1
B0024.9	Thioredoxin domain	1
	Thioredoxin-like	1
	Thioredoxin, conserved site	1
B0025.1	Phosphatidylinositol 3-/4-kinase, catalytic	1
	Phosphatidylinositol 3-kinase, Vps34 type	1
	Phosphatidylinositol 3/4-kinase, conserved site	1
	Phosphoinositide 3-kinase, accessory (PIK) domain	1
	Phosphoinositide 3-kinase, C2	1
B0025.2	PCI/PINT associated module	1
	Proteasome component (PCI) domain	1
B0025.4	Histone H4 acetyltransferase, NuA4 complex, Eaf6	1
B0034.3	Cadherin	1
B0035.1	Zinc finger, BED-type predicted	1
	Zinc finger, C2H2-like	1
	Zinc finger, C2H2-type	1
B0035.10	Histone core	1
	Histone H3	1
B0035.12	Lsm interaction	1
	RNA recognition motif, RNP-1	1
	RNA-processing protein, HAT helix	1
B0035.14	Heat shock protein DnaJ, conserved site	1
	Heat shock protein DnaJ, N-terminal	1
	Protein of unknown function DUF1977, DnaJ-like	1
B0035.16	Queuosine synthesis-like	1
	Thiamine biosynthesis protein, C-terminal	1
	tRNA-specific 2-thiouridylase	1
B0035.2	Heat shock protein DnaJ, conserved site	1
	Heat shock protein DnaJ, N-terminal	1
B0035.3	Appr-1-p processing	1
B0035.4	Prefoldin beta-like	1
	Prefoldin, subunit 4	1
B0035.5	Glucose-6-phosphate dehydrogenase	1
	Glucose-6-phosphate dehydrogenase, active site	1
B0035.7	Histone core	1
	Histone H2A	1
	Transcription factor CBF/NF-Y/archaeal histone	1
B0035.8	Histone core	1
	Histone H2B	1
B0035.9	Histone core	1
	Histone H4	1
	Histone H4, conserved site	1
	TATA box binding protein associated factor (TAF)	1
B0041.3	Peptidoglycan-binding lysin domain	1
	Peptidoglycan-binding Lysin subgroup	1
B0041.4	Ribosomal protein L4/L1e	1
	Ribosomal protein L4/L1e, eukaryotic/archaeal, conserved site	1
B0041.5	TonB box, conserved site	1
B0041.6	6-pyruvoyl tetrahydropterin synthase	1
	6-pyruvoyl tetrahydropterin synthase-related	1
B0041.7	DEAD-like helicase, N-terminal	1
	DNA/RNA helicase, C-terminal	1
	Helicase, superfamily 1/2, ATP-binding domain	1
	SNF2-related	1
B0205.11	Ribosomal protein L9, N-terminal	1
B0205.3	Ubiquitin interacting motif	1
B0205.4	Glycosyl transferase, family 11	1
B0205.6	Aminotransferase class-V pyridoxal-phosphate binding site	1
	Aminotransferase, class V/Cysteine desulfurase	1
	Aromatic amino acid beta-eliminating lyase/threonine aldolase	1
	Cysteine desulfurase	1
	Cysteine desulfurase, NifS	1
B0205.7	Protein kinase, ATP binding site	1
	Protein kinase, catalytic domain	1
	Serine/threonine-protein kinase domain	1
	Serine/threonine-protein kinase-like domain	1
	Serine/threonine-protein kinase, active site	1
	Serine/threonine/tyrosine-protein kinase	1
	Tyrosine-protein kinase, catalytic domain	1
B0207.12	Immunoglobulin-like	1
	Neurotransmitter-gated ion-channel	1
	Neurotransmitter-gated ion-channel ligand-binding	1
	Neurotransmitter-gated ion-channel transmembrane domain	1
	Neurotransmitter-gated ion-channel, conserved site	1
B0207.4	Protein kinase, ATP binding site	1
	Protein kinase, catalytic domain	1
	Serine/threonine-protein kinase domain	1
	Serine/threonine-protein kinase-like domain	1
	Serine/threonine-protein kinase, active site	1
	Serine/threonine/tyrosine-protein kinase	1
	Tyrosine-protein kinase, catalytic domain	1
B0207.6	Protein of unknown function, ATP binding	1
B0212.1	Otopetrin	1
B0212.5	Ankyrin repeat	1
	Ankyrin repeat-containing domain	1
	Ion transport	1
	Transient receptor potential channel	1
B0213.10	Cytochrome P450	1
	Cytochrome P450, conserved site	1
B0213.11	Cytochrome P450	1
	Cytochrome P450, conserved site	1
B0213.12	Cytochrome P450	1
	Cytochrome P450, conserved site	1
B0213.14	Cytochrome P450	1
	Cytochrome P450, conserved site	1
B0213.15	Cytochrome P450	1
	Cytochrome P450, conserved site	1
B0213.16	Cytochrome P450	1
	Cytochrome P450, conserved site	1
B0218.1	Amidase	1
	Amidase, conserved site	1
	Amidase, fungi	1
B0218.2	Amidase	1
	Amidase, conserved site	1
	Amidase, fungi	1
B0218.3	MAP kinase, conserved site	1
	Protein kinase, ATP binding site	1
	Protein kinase, catalytic domain	1
	Serine/threonine-protein kinase domain	1
	Serine/threonine-protein kinase-like domain	1
	Serine/threonine/tyrosine-protein kinase	1
	Tyrosine-protein kinase, catalytic domain	1
B0218.5	Protein kinase, ATP binding site	1
	Protein kinase, catalytic domain	1
	Serine/threonine-protein kinase domain	1
	Serine/threonine-protein kinase-like domain	1
B0218.6	C-type lectin	1
B0218.8	C-type lectin	1
B0222.2	Phosphate transporter	1
B0222.3	Phosphate transporter	1
B0222.4	Aminotransferase, class V/Cysteine desulfurase	1
	Pyridoxal phosphate-dependent decarboxylase	1
B0222.6	Collagen triple helix repeat	1
	Nematode cuticle collagen, N-terminal	1
B0222.7	Collagen triple helix repeat	1
	Nematode cuticle collagen, N-terminal	1
	Pericardin-like prepeat	1
B0222.8	Collagen triple helix repeat	1
	Nematode cuticle collagen, N-terminal	1
B0222.9	[2Fe-2S]-binding	1
	2Fe-2S ferredoxin, iron-sulphur binding site	1
	Aldehyde oxidase/xanthine dehydrogenase, a/b hammerhead	1
	Aldehyde oxidase/xanthine dehydrogenase, molybdopterin binding	1
	FAD-binding, type 2	1
	Ferredoxin	1
	Molybdopterin dehydrogenase, FAD-binding	1
	Protein kinase, ATP binding site	1
B0228.5	Thioredoxin domain	1
	Thioredoxin-like	1
	Thioredoxin, conserved site	1
B0228.7	Methylthioadenosine phosphorylase	1
	Nucleoside phosphorylase	1
	Purine phosphorylase, family 2, conserved site	1
B0238.10	GCN5-related N-acetyltransferase	1
B0240.1	Ammonium transporter	1
B0240.2	DC-STAMP-like	1
B0240.4	Nucleoporin protein Ndc1-Nup	1
B0244.2	Dual-specific/protein-tyrosine phosphatase, conserved region	1
	Peptidase S8/S53, subtilisin/kexin/sedolisin	1
	Protein-tyrosine phosphatase, catalytic	1
	Protein-tyrosine phosphatase, receptor/non-receptor type	1
B0250.1	Ribosomal protein L2	1
B0250.5	3-hydroxyisobutyrate dehydrogenase	1
	3-hydroxyisobutyrate dehydrogenase-related, conserved site	1
	6-phosphogluconate dehydrogenase, NAD-binding	1
B0250.9	Ergosterol biosynthesis ERG4/ERG24	1
B0252.2	Metallophosphoesterase	1
	Saposin B	1
	Sphingomyelin phosphodiesterase	1
B0252.4	Peptidyl-prolyl cis-trans isomerase, cyclophilin-type	1
	Peptidyl-prolyl cis-trans isomerase, cyclophilin-type, conserved site	1
B0261.1	Myb, DNA-binding	1
	SANT, DNA-binding	1
B0261.2	FKBP12-rapamycin-associated protein, FKBP12-rapamycin-binding	1
	Phosphatidylinositol 3-/4-kinase, catalytic	1
	Phosphatidylinositol 3/4-kinase, conserved site	1
	PIK-related kinase	1
	PIK-related kinase, FAT	1
	PIK-related kinase, FATC	1
B0261.4	Ribosomal protein L47, mitochondrial	1
B0272.1	Beta tubulin, autoregulation binding site	1
	Tubulin, conserved site	1
	Tubulin/FtsZ, 2-layer sandwich domain	1
	Tubulin/FtsZ, GTPase domain	1
B0272.3	3-hydroxyacyl-CoA dehydrogenase, C-terminal	1
	3-hydroxyacyl-CoA dehydrogenase, conserved site	1
	3-hydroxyacyl-CoA dehydrogenase, NAD binding	1
	FAD dependent oxidoreductase	1
B0272.4	Crotonase, core	1
B0273.2	Pumilio RNA-binding repeat	1
B0273.4	Death	1
	Immunoglobulin subtype	1
	Immunoglobulin subtype 2	1
	Immunoglobulin V-set	1
	Immunoglobulin-like	1
	Thrombospondin, type 1 repeat	1
	ZU5	1
B0280.1	Prenyltransferase/squalene oxidase	1
B0280.12	Extracellular ligand-binding receptor	1
	Extracellular solute-binding protein, family 3	1
	Glutamate receptor, L-glutamate/glycine-binding	1
	Ionotropic glutamate receptor	1
B0280.17	K Homology	1
B0280.3	Ribose 5-phosphate isomerase, type A	1
B0280.9	WD40 repeat	1
	WD40 repeat, subgroup	1
B0281.3	Zinc finger, B-box	1
	Zinc finger, C3HC4 RING-type	1
	Zinc finger, RING-type	1
	Zinc finger, RING-type, conserved site	1
B0281.4	Potassium channel, voltage dependent, Kv, tetramerisation	1
B0281.5	BTB/POZ-like	1
	Potassium channel, voltage dependent, Kv, tetramerisation	1
B0281.6	BTB/POZ-like	1
	Potassium channel, voltage dependent, Kv, tetramerisation	1
B0281.8	Zinc finger, B-box	1
	Zinc finger, C3HC4 RING-type	1
	Zinc finger, RING-type	1
	Zinc finger, RING-type, conserved site	1
B0285.1	Protein kinase, ATP binding site	1
	Protein kinase, catalytic domain	1
	Serine/threonine-protein kinase domain	1
	Serine/threonine-protein kinase-like domain	1
	Serine/threonine-protein kinase, active site	1
	Serine/threonine/tyrosine-protein kinase	1
	Tyrosine-protein kinase, catalytic domain	1
B0285.10	Aminoglycoside phosphotransferase	1
	Choline/ethanolamine kinase	1
B0285.4	Leucine carboxyl methyltransferase	1
	Leucine carboxyl methyltransferase, LCTM1 1	1
B0285.5	D-glucuronyl C5-epimerase	1
B0285.6	Sodium/sulphate symporter	1
B0285.8	Aminoglycoside phosphotransferase	1
	Choline/ethanolamine kinase	1
B0285.9	Aminoglycoside phosphotransferase	1
	Choline/ethanolamine kinase	1
B0286.2	C-type lectin	1
	D-galactoside/L-rhamnose binding SUEL lectin	1
	EGF-like region, conserved site	1
	EGF-like, type 3	1
	GPCR, family 2-like	1
	GPCR, family 2, extracellular hormone receptor domain	1
	GPCR, family 2, secretin-like	1
	GPS domain	1
B0286.3	1-(5-Phosphoribosyl)-5-amino-4-imidazole-carboxylate (AIR) carboxylase	1
	SAICAR synthetase	1
	SAICAR synthetase, conserved site	1
B0286.4	NOT2/NOT3/NOT5	1
B0286.5	Transcription factor, fork head	1
	Transcription factor, fork head, conserved site	1
B0302.1	GTPase binding	1
	Protein kinase, ATP binding site	1
	Protein kinase, catalytic domain	1
	Serine/threonine-protein kinase domain	1
	Serine/threonine-protein kinase-like domain	1
	Serine/threonine/tyrosine-protein kinase	1
	Src homology-3 domain	1
	Tyrosine-protein kinase, active site	1
	Tyrosine-protein kinase, catalytic domain	1
	Variant SH3	1
B0303.11	Amino acid permease domain	1
B0303.15	Ribosomal protein L11	1
	Ribosomal protein L11, C-terminal	1
	Ribosomal protein L11, N-terminal	1
B0303.2	Methyltransferase, NNMT/PNMT/TEMT	1
B0303.3	Thiolase	1
	Thiolase, active site	1
	Thiolase, acyl-enzyme intermediate active site	1
	Thiolase, C-terminal	1
	Thiolase, conserved site	1
	Thiolase, N-terminal	1
B0303.4	Ubiquitin	1
	Ubiquitin supergroup	1
B0303.7	Src homology-3 domain	1
	Variant SH3	1
B0303.9	Sec1-like protein	1
B0304.1	Helix-loop-helix DNA-binding domain	1
B0304.3	Cytochrome P450	1
	Cytochrome P450, conserved site	1
B0331.1	Cytochrome P450	1
	Cytochrome P450, conserved site	1
B0331.2	Phosphate transporter	1
B0334.3	Thiamine pyrophosphate enzyme, C-terminal TPP-binding	1
	Thiamine pyrophosphate enzyme, central domain	1
	Thiamine pyrophosphate enzyme, N-terminal TPP-binding domain	1
B0334.4	PRELI/MSF1	1
B0334.5	Magnesium transporter	1
	Squalene/phytoene synthase	1
B0334.6	7TM GPCR, rhodopsin-like	1
	7TM GPCR, serpentine receptor class w (Srw)	1
	GPCR, rhodopsin-like superfamily	1
B0334.8	Phosphatidylinositol 3-/4-kinase, catalytic	1
	Phosphatidylinositol 3-kinase, p85-binding	1
	Phosphatidylinositol 3/4-kinase, conserved site	1
	Phosphoinositide 3-kinase, accessory (PIK) domain	1
	Phosphoinositide 3-kinase, C2	1
	Phosphoinositide 3-kinase, ras-binding	1
B0336.10	Ribosomal protein L14 conserved site	1
	Ribosomal protein L14b/L23e	1
B0336.11	Cellular retinaldehyde-binding/triple function, C-terminal	1
	EF-Hand 1, calcium-binding site	1
	Major sperm protein	1
B0336.13	Transcription initiation factor IIA, gamma subunit, C-terminal	1
	Transcription initiation factor IIA, gamma subunit, N-terminal	1
B0336.2	ADP-ribosylation factor	1
	ARF/SAR superfamily	1
	MIRO-like	1
	Ras	1
	Ras small GTPase, Rab type	1
	Signal recognition particle receptor, beta subunit	1
	Small GTP-binding protein	1
	Small GTPase SAR1-type	1
B0336.3	RNA recognition motif, RNP-1	1
	Zinc finger, CCCH-type	1
B0336.4	Regulator of G protein signalling	1
B0336.6	Abl-interactor, homeo-domain homologous region	1
	Src homology-3 domain	1
	Variant SH3	1
B0336.8	Autophagy-related protein 12	1
B0336.9	Splicing factor, suppressor of white apricot	1
	SWAP/Surp	1
B0348.4	C2 calcium-dependent membrane targeting	1
	C2 membrane targeting protein	1
	Phospholipase C, phosphatidylinositol-specific , X domain	1
	Phospholipase C, phosphatidylinositol-specific, Y domain	1
	Phospholipase C, phosphoinositol-specific, EF-hand-like	1
B0348.6	Eukaryotic translation initiation factor 4E (eIF-4E)	1
	Eukaryotic translation initiation factor 4E (eIF-4E), conserved site	1
B0350.2	Ankyrin repeat	1
	Ankyrin repeat-containing domain	1
	Death	1
	Glycoside hydrolase, family 1, active site	1
	ZU5	1
B0361.10	Longin	1
	Synaptobrevin	1
B0361.2	Cwf19-like protein, C-terminal domain-2	1
	Cwf19-like, C-terminal domain-1	1
B0361.5	Phosphatidylserine decarboxylase	1
	Phosphatidylserine decarboxylase-related	1
B0361.6	Protein of unknown function DUF171	1
B0361.7	Histidine phosphatase superfamily, clade-2	1
B0361.8	Glycosyl transferase, group 1	1
B0365.1	ATP-citrate lyase/succinyl-CoA ligase	1
	ATP-citrate lyase/succinyl-CoA ligase, active site	1
	ATP-citrate synthase	1
	CoA-binding	1
	Succinyl-CoA ligase, alpha subunit	1
	Succinyl-CoA synthetase, beta subunit, conserved site	1
B0365.3	ATPase, P-type cation exchange, alpha subunit, eukaryotic	1
	ATPase, P-type cation-transporter, C-terminal	1
	ATPase, P-type cation-transporter, N-terminal	1
	ATPase, P-type phosphorylation site	1
	ATPase, P-type, ATPase-associated domain	1
	ATPase, P-type, K/Mg/Cd/Cu/Zn/Na/Ca/Na/H-transporter	1
	Haloacid dehalogenase-like hydrolase	1
B0365.6	C-type lectin	1
	C-type lectin, conserved site	1
	CUB	1
B0379.4	Dullard-like phosphatase domain	1
	NLI interacting factor	1
B0393.1	Ribosomal protein S2	1
	Ribosomal protein S2, conserved site	1
	Ribosomal protein S2, eukaryotic/archaeal	1
B0393.2	RabGAP/TBC	1
B0393.5	EGF	1
	EGF calcium-binding	1
	EGF-like	1
	EGF-like calcium-binding	1
	EGF-like calcium-binding, conserved site	1
	EGF-like region, conserved site	1
	EGF-like, type 3	1
	EGF-type aspartate/asparagine hydroxylation site	1
	Nidogen, extracellular domain	1
B0395.1	Cation/H+ exchanger	1
	Na+/H+ exchanger, subfamily	1
B0395.2	Membrane bound O-acyl transferase, MBOAT	1
B0395.3	Acyltransferase ChoActase/COT/CPT	1
B0399.1	Calmodulin-binding domain	1
	Ion transport 2	1
	Potassium channel, calcium-activated, SK, conserved region	1
B0403.2	Ubiquitin-conjugating enzyme, E2	1
B0403.4	Disulphide isomerase	1
	Thioredoxin domain	1
	Thioredoxin-like	1
	Thioredoxin, conserved site	1
B0410.2	Strabismus	1
B0412.1	Transforming protein Ski	1
B0412.2	Transforming growth factor beta	1
	Transforming growth factor beta, conserved site	1
	Transforming growth factor-beta	1
B0412.4	Ribosomal protein S14	1
	Ribosomal protein S14, conserved site	1
B0414.2	Acute myeloid leukemia 1 (AML 1)/Runt	1
B0414.3	Histone H1/H5	1
B0414.5	RNA recognition motif, RNP-1	1
B0414.6	DEAD-like helicase, N-terminal	1
	DNA/RNA helicase, C-terminal	1
	DNA/RNA helicase, DEAD/DEAH box type, N-terminal	1
	Helicase, superfamily 1/2, ATP-binding domain	1
	RNA helicase, ATP-dependent, DEAD-box, conserved site	1
	RNA helicase, DEAD-box type, Q motif	1
	Zinc finger, CCHC-type	1
B0414.7	Protein kinase, catalytic domain	1
	Serine/threonine-protein kinase domain	1
	Serine/threonine-protein kinase-like domain	1
	Serine/threonine-protein kinase, active site	1
	Serine/threonine/tyrosine-protein kinase	1
	Tyrosine-protein kinase, catalytic domain	1
B0414.8	Vps51/Vps67	1
B0416.1	TMC	1
B0416.5	Major facilitator superfamily MFS-1	1
B0416.6	Glycosyl transferase, family 13	1
B0432.13	Zinc finger, C3HC4 RING-type	1
	Zinc finger, RING-type	1
B0432.2	DJ-1	1
	ThiJ/PfpI	1
B0432.4	Mitochondrial substrate/solute carrier	1
B0432.5	Aromatic amino acid hydroxylase, C-terminal	1
	Aromatic amino acid hydroxylase, iron/copper binding site	1
	Tyrosine 3-monooxygenase-like	1
B0432.8	Deoxyribonuclease, TatD Mg-dependent	1
	Deoxyribonuclease, TatD-related	1
	Deoxyribonuclease, TatD-related, conserved site	1
B0454.6	Amino acid permease domain	1
	Amino acid/polyamine transporter I	1
B0454.7	C-type lectin	1
	C-type lectin, conserved site	1
	CUB	1
B0457.1	D-galactoside/L-rhamnose binding SUEL lectin	1
	GPCR, family 2-like	1
	GPCR, family 2, extracellular hormone receptor domain	1
	GPCR, family 2, secretin-like	1
	GPS domain	1
B0464.1	Aminoacyl-tRNA synthetase, class II (D/K/N)	1
	Aminoacyl-tRNA synthetase, class II, conserved domain	1
	Aspartyl-tRNA synthetase, class IIb, archea/euk type	1
	Nucleic acid binding, OB-fold, tRNA/helicase-type	1
B0464.2	Tetratricopeptide repeat	1
	Tetratricopeptide repeat-containing	1
	Tetratricopeptide TPR-1	1
B0464.5	Protein kinase, ATP binding site	1
	Protein kinase, catalytic domain	1
	Serine/threonine-protein kinase domain	1
	Serine/threonine-protein kinase-like domain	1
	Serine/threonine-protein kinase, active site	1
	Serine/threonine/tyrosine-protein kinase	1
	Tyrosine-protein kinase, catalytic domain	1
B0464.6	Cytochrome B561-related, N-terminal	1
B0464.7	Barrier- to-autointegration factor, BAF	1
B0464.9	Alpha/beta hydrolase fold-1	1
	Protein phosphatase methylesterase, eukaryotic	1
B0478.1	MAP kinase, conserved site	1
	Protein kinase, catalytic domain	1
	Serine/threonine-protein kinase domain	1
	Serine/threonine-protein kinase-like domain	1
	Serine/threonine-protein kinase, active site	1
	Serine/threonine/tyrosine-protein kinase	1
	Tyrosine-protein kinase, catalytic domain	1
B0491.1	Mannosyltransferase, DXD	1
B0491.2	Collagen triple helix repeat	1
	Nematode cuticle collagen, N-terminal	1
B0491.7	Diphthine synthase	1
	Tetrapyrrole methylase	1
B0491.8	Chloride channel, voltage gated	1
	Cystathionine beta-synthase, core	1
	Sugar transporter, conserved site	1
B0495.2	Protein kinase, catalytic domain	1
	Serine/threonine-protein kinase domain	1
	Serine/threonine-protein kinase-like domain	1
	Serine/threonine-protein kinase, active site	1
	Serine/threonine/tyrosine-protein kinase	1
	Tyrosine-protein kinase, catalytic domain	1
B0495.4	Cation/H+ exchanger	1
	Na+/H+ exchanger, subfamily	1
B0495.7	Peptidase M20	1
	Peptidase M28	1
B0495.8	LUC7 related	1
B0496.3	Protein kinase, ATP binding site	1
	Protein kinase, catalytic domain	1
	RIO-like kinase	1
	Serine/threonine-protein kinase domain	1
	Serine/threonine-protein kinase-like domain	1
	Serine/threonine-protein kinase, active site	1
	Serine/threonine/tyrosine-protein kinase	1
	Tyrosine-protein kinase, catalytic domain	1
B0496.7	Zinc finger, LIM-type	1
B0496.8	PET domain	1
	Zinc finger, LIM-type	1
B0507.2	BRO1	1
B0511.1	EF-Hand 1, calcium-binding site	1
	Peptidyl-prolyl cis-trans isomerase, FKBP-type	1
B0511.10	Eukaryotic translation initiation factor 3 (eIF3), subunit 6, N-terminal	1
	Proteasome component (PCI) domain	1
	Translation initiation factor 3, subunit 6, eukaryotic	1
B0511.12	Pecanex	1
B0511.13	Metallophosphoesterase	1
B0511.4	Protein kinase, ATP binding site	1
	Protein kinase, catalytic domain	1
	Serine/threonine-protein kinase domain	1
	Serine/threonine-protein kinase-like domain	1
	Serine/threonine-protein kinase, active site	1
	Serine/threonine/tyrosine-protein kinase	1
	Tyrosine-protein kinase, catalytic domain	1
B0511.6	DEAD-like helicase, N-terminal	1
	DNA/RNA helicase, C-terminal	1
	DNA/RNA helicase, DEAD/DEAH box type, N-terminal	1
	Helicase, superfamily 1/2, ATP-binding domain	1
	RNA helicase, ATP-dependent, DEAD-box, conserved site	1
	RNA helicase, DEAD-box type, Q motif	1
B0511.7	Forkhead-associated	1
B0513.2	Tho complex subunit 7/Mft1p	1
B0513.3	Ribosomal protein L29e	1
B0513.5	Proline dehydrogenase	1
B0513.9	Synaptobrevin	1
	Synaptobrevin, metazoa/fungi	1
B0523.5	Gelsolin	1
	Gelsolin domain	1
	Leucine-rich repeat	1
	Leucine-rich repeat, typical subtype	1
B0524.2	Patatin	1
B0545.1	AGC-kinase, C-terminal	1
	Protein kinase C-like, phorbol ester/diacylglycerol binding	1
	Protein kinase C, delta/epsilon/eta/theta types	1
	Protein kinase, ATP binding site	1
	Protein kinase, C-terminal	1
	Protein kinase, catalytic domain	1
	Serine/threonine-protein kinase domain	1
	Serine/threonine-protein kinase-like domain	1
	Serine/threonine-protein kinase, active site	1
	Serine/threonine/tyrosine-protein kinase	1
	Tyrosine-protein kinase, catalytic domain	1
B0545.3	Allergen V5/Tpx-1 related	1
	SCP-like extracellular	1
B0545.4	HAT dimerisation	1
B0546.2	Ovarian tumour, otubain	1
B0546.4	Yippee-like protein	1
B0547.1	Mov34/MPN/PAD-1	1
B0563.2	Tetraspanin	1
B0563.4	Bax inhibitor-1-related	1
B0564.1	Exoribonuclease, phosphorolytic domain 1	1
	Exoribonuclease, phosphorolytic domain 2	1
	Mitochondrial inner membrane translocase complex, Tim8/9/10/13-zinc finger-like	1
	Ribonuclease PH, conserved site	1
B0564.10	Homeobox	1
	Homeobox Pitx/unc30	1
	Homeobox, conserved site	1
B0564.2	Oxoglutarate/iron-dependent oxygenase	1
B0564.3	Bestrophin-like	1
B0564.4	Bestrophin-like	1
BE0003N10.1	Exoribonuclease, phosphorolytic domain 1	1
	Exoribonuclease, phosphorolytic domain 2	1
	K Homology, type 1, subgroup	1
	Polynucleotide phosphorylase, phosphorolytic RNA-binding, bacterial/organelle-type	1
	Polyribonucleotide nucleotidyltransferase	1
	Ribosomal protein S1, RNA binding domain	1
BE0003N10.2	N-chimaerin	1
	Protein kinase C-like, phorbol ester/diacylglycerol binding	1
	RhoGAP	1
	SH2 motif	1
BE0003N10.3	Carbohydrate-binding/sugar hydrolysis domain	1
	Immunoglobulin/major histocompatibility complex, conserved site	1
	Parallel beta-helix repeat	1
	Protein of unknown function DUF13	1
	Zinc finger, N-recognin	1
	Zinc finger, N-recognin, metazoa	1
BE10.2	Fatty acid hydroxylase	1
C01A2.3	Membrane insertion protein, OxaA/YidC	1
C01A2.4	Snf7	1
C01B10.8	Methyltransferase type 11	1
	Methyltransferase type 12	1
	Spermine synthase	1
C01B10.9	Type I phosphodiesterase/nucleotide pyrophosphatase/phosphate transferase	1
C01B12.1	Collagen triple helix repeat	1
	Nematode cuticle collagen, N-terminal	1
C01B12.2	SAND	1
C01B12.3	Bestrophin-like	1
C01B12.5	Bestrophin-like	1
C01B4.6	Aldose 1-epimerase	1
C01B4.9	Major facilitator superfamily MFS-1	1
C01B7.4	Guanylate kinase	1
	Guanylate kinase, conserved site	1
	Guanylate kinase/L-type calcium channel	1
	PDZ/DHR/GLGF	1
	Src homology-3 domain	1
	Variant SH3	1
C01B7.6	Anaphase-promoting complex, subunit 10	1
	PHR	1
	Regulator of chromosome condensation, RCC1	1
	Serine/threonine-specific protein phosphatase/bis(5-nucleosyl)-tetraphosphatase	1
	Zinc finger, B-box	1
	Zinc finger, RING-type	1
C01C10.3	Phospholipid/glycerol acyltransferase	1
C01C4.3	Protein kinase, ATP binding site	1
	Protein kinase, catalytic domain	1
	Serine/threonine-protein kinase domain	1
	Serine/threonine-protein kinase-like domain	1
	Serine/threonine/tyrosine-protein kinase	1
	Tyrosine-protein kinase, catalytic domain	1
C01F1.1	Transcription initiation factor IIF, alpha subunit	1
C01F1.2	Copper chaperone SCO1/SenC	1
	Lipocalin conserved site	1
C01F1.3	Male sterility, NAD-binding	1
	NAD-dependent epimerase/dehydratase	1
	Polysaccharide biosynthesis protein CapD-like	1
C01F1.6	Ankyrin repeat	1
	Ankyrin repeat-containing domain	1
C01F4.2	RhoGAP	1
C01F6.6	PDZ/DHR/GLGF	1
C01F6.9	Zinc finger, C2H2-type	1
C01G10.10	Peptidase M22, glycoprotease	1
	Peptidase M22, glycoprotease, subgroup	1
C01G10.11	FEZ-like	1
C01G10.7	Citrate lyase, beta subunit	1
	HpcH/HpaI aldolase	1
C01G10.8	Activator of Hsp90 ATPase homologue 1-like	1
	Activator of Hsp90 ATPase, N-terminal	1
C01G10.9	Initiation factor 2B alpha/beta/delta	1
	Initiation factor 2B related	1
	Putative translation initiation factor, aIF-2BI/5-methylthioribose-1-phosphate isomerase	1
C01G12.5	Short-chain dehydrogenase/reductase SDR	1
	Short-chain dehydrogenase/reductase, conserved site	1
C01G12.8	ATPase, P-type cation exchange, alpha subunit, eukaryotic	1
	ATPase, P-type cation-transporter, C-terminal	1
	ATPase, P-type cation-transporter, N-terminal	1
	ATPase, P-type phosphorylation site	1
	ATPase, P-type, ATPase-associated domain	1
	ATPase, P-type, K/Mg/Cd/Cu/Zn/Na/Ca/Na/H-transporter	1
	Haloacid dehalogenase-like hydrolase	1
C01G5.2	Argonaute/Dicer protein, PAZ	1
	Stem cell self-renewal protein Piwi	1
C01G5.5	Aldo/keto reductase	1
	Aldo/keto reductase, conserved site	1
C01G5.6	Peptidase aspartic, eukaryotic predicted	1
C01G5.8	VRR-NUC	1
C01G6.1	Aquaporin	1
	Major intrinsic protein	1
C01G6.4	Zinc finger, C3HC4 RING-type	1
	Zinc finger, RING-type	1
C01G6.6	FAD-binding, type 1	1
	Ferredoxin reductase-type FAD-binding domain	1
	Flavodoxin/nitric oxide synthase	1
	Oxidoreductase FAD/NAD(P)-binding	1
C01G6.7	AMP-binding, conserved site	1
	AMP-dependent synthetase/ligase	1
C01G6.8	Carbohydrate kinase, FGGY, conserved site	1
	Frizzled-like domain	1
	Immunoglobulin subtype	1
	Immunoglobulin subtype 2	1
	Immunoglobulin V-set	1
	Immunoglobulin-like	1
	Kringle	1
	Kringle, conserved site	1
	Protein kinase, ATP binding site	1
	Protein kinase, catalytic domain	1
	Serine/threonine-protein kinase domain	1
	Serine/threonine-protein kinase-like domain	1
	Serine/threonine/tyrosine-protein kinase	1
	Tyrosine-protein kinase, active site	1
	Tyrosine-protein kinase, catalytic domain	1
	Tyrosine-protein kinase, receptor ROR, subgroup	1
C01G8.2	Batten's disease protein Cln3	1
	Batten's disease protein Cln3, subgroup	1
C01G8.3	Short-chain dehydrogenase/reductase SDR	1
C01G8.4	Heat shock protein DnaJ, N-terminal	1
C01G8.5	Band 4.1 domain	1
	Ezrin/radixin/moesin	1
	Ezrin/radixin/moesin, C-terminal	1
	FERM central domain	1
	FERM conserved site	1
	FERM domain	1
	FERM, C-terminal PH-like domain	1
	FERM, N-terminal	1
C01G8.9	ARID/BRIGHT DNA-binding domain	1
	XYPPX repeat	1
C01H6.1	Collagen triple helix repeat	1
	Nematode cuticle collagen, N-terminal	1
C01H6.2	Ankyrin repeat	1
	Ankyrin repeat-containing domain	1
C01H6.4	FAD dependent oxidoreductase	1
	FAD-dependent pyridine nucleotide-disulphide oxidoreductase	1
	Flavin-containing monooxygenase-like	1
	Fumarate reductase/succinate dehydrogenase flavoprotein, N-terminal	1
	HI0933-like protein	1
	Pyridine nucleotide-disulphide oxidoreductase, NAD-binding region	1
C01H6.5	Nuclear hormone receptor, ligand-binding, core	1
	Zinc finger, nuclear hormone receptor-type	1
C01H6.6	Cystathionine beta-synthase, core	1
	Protein of unknown function DUF21	1
C01H6.7	Bromodomain	1
C01H6.9	Protein kinase, ATP binding site	1
	Protein kinase, catalytic domain	1
	Serine/threonine-protein kinase-like domain	1
	Serine/threonine/tyrosine-protein kinase	1
C02A12.1	Glutathione S-transferase, C-terminal	1
	Glutathione S-transferase, N-terminal	1
	Glutathione S-transferase/chloride channel, C-terminal	1
C02B10.1	Acyl-CoA dehydrogenase, conserved site	1
	Acyl-CoA dehydrogenase, N-terminal	1
	Acyl-CoA dehydrogenase, type 2, C-terminal	1
	Acyl-CoA oxidase/dehydrogenase, central domain	1
	Acyl-CoA oxidase/dehydrogenase, type 1	1
C02B8.4	Helix-loop-helix DNA-binding domain	1
C02B8.6	WWE domain	1
	WWE domain, subgroup	1
	Zinc finger, C3HC4 RING-type	1
	Zinc finger, RING-type	1
	Zinc finger, RING-type, conserved site	1
C02C2.1	Metridin-like ShK toxin	1
	Tyrosinase	1
C02C2.5	Nitroreductase-like	1
C02C6.1	Dynamin central region	1
	Dynamin GTPase effector	1
	Dynamin, GTPase domain	1
	Dynamin, GTPase region, conserved site	1
	Pleckstrin homology	1
C02C6.3	Cysteine-rich flanking region, C-terminal domain	1
	Leucine-rich repeat	1
C02D4.2	7TM GPCR, rhodopsin-like	1
	7TM GPCR, serpentine receptor class sx (Srsx)	1
	7TM GPCR, serpentine receptor class v (Srv), Nematode	1
	GPCR, rhodopsin-like superfamily	1
C02D5.2	Gamma interferon inducible lysosomal thiol reductase GILT	1
C02D5.3	Glutathione S-transferase, C-terminal	1
	Glutathione S-transferase, N-terminal	1
	Glutathione S-transferase/chloride channel, C-terminal	1
C02E7.1	ATPase, P-type cation-transporter, C-terminal	1
	ATPase, P-type cation-transporter, N-terminal	1
	ATPase, P-type phosphorylation site	1
	ATPase, P-type, ATPase-associated domain	1
	ATPase, P-type, K/Mg/Cd/Cu/Zn/Na/Ca/Na/H-transporter	1
	Bacterial extracellular solute-binding family 1, conserved site	1
	Haloacid dehalogenase-like hydrolase	1
C02F12.4	Dbl homology (DH) domain	1
	Pleckstrin homology	1
C02F4.1	Src homology-3 domain	1
C02F4.2	Metallophosphoesterase	1
	Serine/threonine-specific protein phosphatase/bis(5-nucleosyl)-tetraphosphatase	1
C02F5.3	GTP-binding protein, HSR1-related	1
	GTP1/OBG, conserved site	1
	Small GTP-binding protein	1
	TGS	1
C02F5.4	Protein of unknown function DUF618	1
	RNA polymerase II, large subunit, CTD	1
C02F5.7	Cyclin-like F-box	1
	Leucine-rich repeat, cysteine-containing subtype	1
C02F5.9	Proteasome, beta-type subunit, conserved site	1
	Proteasome, subunit alpha/beta	1
C02G6.1	Peptidase M16, C-terminal	1
	Peptidase M16, N-terminal	1
	Peptidase M16, zinc-binding site	1
C02G6.2	Peptidase M16, C-terminal	1
	Peptidase M16, N-terminal	1
	Peptidase M16, zinc-binding site	1
C02H6.1	Glycosyl transferase, family 31	1
C02H7.1	Microtubule/TRAF3 and DISC1 binding protein	1
C02H7.3	dDENN	1
	DENN	1
	Proteinase inhibitor I1, Kazal	1
	uDENN	1
C03A3.2	Amino acid transporter, transmembrane	1
C03B8.4	Zinc finger, C2H2-like	1
	Zinc finger, C2H2-type	1
C03C10.1	Protein kinase, ATP binding site	1
	Protein kinase, catalytic domain	1
	Serine/threonine-protein kinase domain	1
	Serine/threonine-protein kinase-like domain	1
	Serine/threonine-protein kinase, active site	1
	Serine/threonine/tyrosine-protein kinase	1
C03C10.3	Ribonucleotide reductase	1
C03C10.4	SH3-binding 5	1
C03C11.2	Anti-proliferative protein	1
C03D6.3	ATP dependent DNA ligase, central	1
	Dual specificity phosphatase, catalytic domain	1
	Dual-specific/protein-tyrosine phosphatase, conserved region	1
	mRNA capping enzyme	1
	mRNA capping enzyme, bifunctional	1
	mRNA capping enzyme, C-terminal	1
	Protein-tyrosine phosphatase, active site	1
C03D6.5	Histone chaperone, ASF1-like	1
	Histone deposition protein Asf1	1
C03D6.8	Ribosomal protein L24e	1
	TRASH	1
C03E10.4	N-acetylglucosaminyltransferase II	1
C03E10.5	C-type lectin	1
	Collagen triple helix repeat	1
C03F11.1	Calmodulin-binding domain	1
	Ion transport 2	1
	Potassium channel, calcium-activated, SK, conserved region	1
C03F11.3	CD36 antigen	1
C03G5.1	FAD dependent oxidoreductase	1
	Fumarate reductase/succinate dehydrogenase flavoprotein, C-terminal	1
	Fumarate reductase/succinate dehydrogenase flavoprotein, N-terminal	1
	Fumarate reductase/succinate dehydrogenase, FAD-binding site	1
	Succinate dehydrogenase, flavoprotein subunit	1
	Succinate dehydrogenase/fumarate reductase, flavoprotein subunit	1
C03G6.14	Cytochrome P450	1
	Cytochrome P450, conserved site	1
C03G6.15	Cytochrome P450	1
	Cytochrome P450, conserved site	1
C03G6.19	Protease inhibitor I4, serpin	1
C03H5.1	C-type lectin	1
	C-type lectin, conserved site	1
	CUB	1
	Lipocalin conserved site	1
C03H5.2	Nucleotide-sugar transporter	1
	Protein of unknown function DUF6, transmembrane	1
	UDP-galactose transporter	1
	UDP/CMP-sugar transporter	1
C03H5.4	Phospholipase A2, active site	1
	Phospholipase A2, eukaryotic	1
C04A11.3	Protein kinase, catalytic domain	1
	Serine/threonine-protein kinase domain	1
	Serine/threonine-protein kinase-like domain	1
	Serine/threonine-protein kinase, active site	1
	Serine/threonine/tyrosine-protein kinase	1
	Tyrosine-protein kinase, catalytic domain	1
C04A11.4	ADAM, cysteine-rich	1
	Blood coagulation inhibitor, Disintegrin	1
	EGF-like region, conserved site	1
	EGF-like, type 3	1
	Peptidase M12B, ADAM/reprolysin	1
C04A2.1	RabGAP/TBC	1
C04A2.3	Bromo adjacent homology (BAH) domain	1
	ELM2	1
	Myb, DNA-binding	1
	SANT, DNA-binding	1
	SANT, eukarya	1
	Zinc finger, GATA-type	1
C04A2.7	Heat shock protein DnaJ, N-terminal	1
C04C3.2	Neurotransmitter-gated ion-channel ligand-binding	1
	Neurotransmitter-gated ion-channel transmembrane domain	1
	Neurotransmitter-gated ion-channel, conserved site	1
C04C3.3	Transketolase-like, pyrimidine-binding domain	1
	Transketolase, C-terminal	1
C04C3.5	Clusterin-associated protein-1	1
C04D8.1	Pleckstrin homology	1
	RhoGAP	1
C04E12.11	Arrestin-like, N-terminal	1
C04E12.12	Arrestin-like, C-terminal	1
	Arrestin-like, N-terminal	1
C04E12.7	Scramblase	1
C04F1.3	Homeobox	1
	Homeobox, conserved site	1
	Zinc finger, LIM-type	1
C04F12.10	Peptidase M48	1
C04F12.3	Ankyrin repeat	1
	Ankyrin repeat-containing domain	1
	Death	1
C04F12.4	Ribosomal protein L14	1
C04F12.8	Dual specificity phosphatase, catalytic domain	1
	Dual specificity phosphatase, subgroup, catalytic domain	1
	Dual-specific/protein-tyrosine phosphatase, conserved region	1
	Protein-tyrosine phosphatase, active site	1
C04F12.9	Ribonuclease H	1
C04F5.1	Protease inhibitor I4, serpin	1
C04F6.3	Chitin binding protein, peritrophin-A	1
	Chitinase II	1
	Glycoside hydrolase, chitinase active site	1
	Glycoside hydrolase, family 18, catalytic domain	1
C04F6.4	WD40 repeat	1
	WD40 repeat 2	1
	WD40 repeat, conserved site	1
	WD40 repeat, subgroup	1
	WD40-repeat-containing domain	1
C04G2.6	2Fe-2S ferredoxin, iron-sulphur binding site	1
	Homeobox, conserved site	1
	Nucleotide binding protein, PINc	1
	Ribonuclease B, N-terminal OB domain	1
	Ribonuclease II/R	1
C04G2.7	Paired box protein, N-terminal	1
C04G6.1	MAP kinase, conserved site	1
	Protein kinase, ATP binding site	1
	Protein kinase, catalytic domain	1
	Serine/threonine-protein kinase domain	1
	Serine/threonine-protein kinase-like domain	1
	Serine/threonine-protein kinase, active site	1
	Serine/threonine/tyrosine-protein kinase	1
	Tyrosine-protein kinase, catalytic domain	1
C04G6.10	Alpha defensin	1
C04G6.3	Phospholipase D, eukaryota	1
	Phospholipase D/Transphosphatidylase	1
	Phox-like	1
	Pleckstrin homology	1
C04G6.7	Alpha defensin	1
C04H5.1	Protein of unknown function DUF343	1
C04H5.6	DEAD-like helicase, N-terminal	1
	DNA/RNA helicase, ATP-dependent, DEAH-box type, conserved site	1
	DNA/RNA helicase, C-terminal	1
	Domain of unknown function DUF1605	1
	Helicase-associated domain	1
	Helicase, superfamily 1/2, ATP-binding domain	1
C05A2.1	Metallophosphoesterase	1
	Serine/threonine-specific protein phosphatase/bis(5-nucleosyl)-tetraphosphatase	1
C05A9.1	ABC transporter integral membrane type 1	1
	ABC transporter-like	1
	ABC transporter, conserved site	1
	ABC transporter, transmembrane domain	1
	ATPase, AAA+ type, core	1
C05B10.1	Dual specificity phosphatase, catalytic domain	1
	Dual specificity phosphatase, subgroup, catalytic domain	1
	Dual-specific/protein-tyrosine phosphatase, conserved region	1
C05B5.7	Regulator of G protein signalling	1
C05C10.1	Histidine phosphatase superfamily, clade-2	1
C05C10.3	3-oxoacid CoA-transferase	1
	3-oxoacid CoA-transferase, subunit A	1
	3-oxoacid CoA-transferase, subunit B	1
	Coenzyme A transferase	1
	Coenzyme A transferase active site	1
	Coenzyme A transferase binding site	1
C05C10.4	Histidine phosphatase superfamily, clade-2	1
C05C10.6	PLAA family ubiquitin binding, PFU	1
	PUL	1
	WD40 repeat	1
	WD40 repeat 2	1
	WD40 repeat, subgroup	1
	WD40-repeat-containing domain	1
C05C12.3	Ion transport	1
C05C8.1	Leucine-rich repeat, cysteine-containing subtype	1
C05C8.3	Peptidyl-prolyl cis-trans isomerase, FKBP-type	1
C05C8.5	Exonuclease	1
	Exonuclease, RNase T/DNA polymerase III	1
C05C8.6	BTB/Kelch-associated	1
	BTB/POZ	1
	BTB/POZ-like	1
C05C8.7	Mannose-6-phosphate isomerase	1
	Mannose-6-phosphate isomerase, type I	1
	Phosphomannose isomerase, type I, conserved site	1
C05D10.2	MAP kinase, conserved site	1
	Protein kinase, ATP binding site	1
	Protein kinase, catalytic domain	1
	Serine/threonine-protein kinase domain	1
	Serine/threonine-protein kinase-like domain	1
	Serine/threonine-protein kinase, active site	1
	Serine/threonine/tyrosine-protein kinase	1
	Tyrosine-protein kinase, catalytic domain	1
C05D10.3	ABC transporter-like	1
	ABC-2 type transporter	1
	ATPase, AAA+ type, core	1
	Pigment precursor permease	1
C05D11.11	Serine hydroxymethyltransferase	1
	Serine hydroxymethyltransferase, pyridoxal phosphate binding site	1
C05D11.12	4Fe-4S ferredoxin, iron-sulpur binding domain	1
	Electron transfer flavoprotein-ubiquinone oxidoreductase	1
	FAD dependent oxidoreductase	1
	FAD-dependent pyridine nucleotide-disulphide oxidoreductase	1
	Fumarate reductase/succinate dehydrogenase flavoprotein, N-terminal	1
	HI0933-like protein	1
	Lycopene beta/epsilon cyclase	1
	Monooxygenase, FAD-binding	1
C05D11.2	Vacuolar protein sorting-associated protein 16	1
	Vps16, C-terminal	1
	Vps16, N-terminal	1
C05D11.4	Interleukin 1/heparin-binding growth factor	1
C05D11.5	Xylose isomerase, TIM barrel domain	1
C05D11.6	Peptidase M12A, astacin	1
	Peptidase, metallopeptidase	1
C05D11.7	Patatin	1
C05D11.8	Retinoic acid induced 16-like protein	1
C05D11.9	Helix-turn-helix, AraC type, subdomain 2	1
	POPLD	1
	Ribonuclease P/MRP, subunit POP1	1
C05D12.1	Cytochrome b561/ferric reductase transmembrane	1
	DOMON related	1
	Immunoglobulin/major histocompatibility complex, conserved site	1
C05D2.1	Protein kinase, catalytic domain	1
	Serine/threonine-protein kinase domain	1
	Serine/threonine-protein kinase-like domain	1
	Serine/threonine-protein kinase, active site	1
	Serine/threonine/tyrosine-protein kinase	1
	Tyrosine-protein kinase, catalytic domain	1
C05D2.10	WD40 repeat	1
	WD40 repeat 2	1
	WD40 repeat, conserved site	1
	WD40 repeat, subgroup	1
	WD40-repeat-containing domain	1
C05D9.1	Phox-like	1
C05D9.2	Lysosome-associated membrane glycoprotein (Lamp)/CD68	1
C05D9.3	EGF-like region, conserved site	1
	Integrin beta subunit	1
C05D9.5	Eukaryotic translation initiation factor 4E (eIF-4E)	1
	Eukaryotic translation initiation factor 4E (eIF-4E), conserved site	1
C05E11.1	Protein of unknown function DUF2296	1
C05E4.1	Protease inhibitor I4, serpin	1
C05E4.3	Protease inhibitor I4, serpin	1
C05G5.1	Major facilitator superfamily MFS-1	1
C05G5.4	ATP-citrate lyase/succinyl-CoA ligase	1
	ATP-citrate lyase/succinyl-CoA ligase, active site	1
	CoA-binding	1
	Succinyl-CoA ligase, alpha subunit	1
C05H8.1	Protein kinase, ATP binding site	1
	Protein kinase, catalytic domain	1
	Serine/threonine-protein kinase domain	1
	Serine/threonine-protein kinase-like domain	1
	Serine/threonine-protein kinase, active site	1
	Serine/threonine/tyrosine-protein kinase	1
	Tyrosine-protein kinase, catalytic domain	1
C06A1.1	ATPase, AAA-3	1
	ATPase, AAA-type, CDC48	1
	ATPase, AAA-type, conserved site	1
	ATPase, AAA-type, core	1
	ATPase, AAA-type, VAT, N-terminal	1
	ATPase, AAA+ type, core	1
	Cell division protein 48, CDC48, domain 2	1
	Magnesium chelatase, ChlI subunit	1
C06A1.5	DNA-directed RNA polymerase, 14-18kDa subunit, conserved site	1
	EF-Hand 1, calcium-binding site	1
	RNA polymerase Rpb6	1
C06A1.6	Endonuclease III, iron-sulphur binding site	1
C06A1.7	Endonuclease III, iron-sulphur binding site	1
C06A12.3	Protein of unknown function DUF727	1
C06A5.11	NAD-dependent histone deacetylase, silent information regulator Sir2	1
C06A5.3	PWWP	1
C06A5.7	Tropomodulin	1
C06A6.3	FAM125	1
C06A6.4	ArgE/DapE/ACY1/CPG2/YscS, conserved site	1
	N-acyl-L-amino-acid amidohydrolase	1
	Peptidase M20	1
	Peptidase M20, dimerisation	1
C06A6.5	Thioredoxin domain	1
	Thioredoxin-like	1
C06A8.1	Eukaryotic-type methylenetetrahydrofolate reductase	1
	Methylenetetrahydrofolate reductase	1
C06A8.6	Cecropin	1
	Leucine-rich repeat	1
	Leucine-rich repeat, typical subtype	1
	U2A'/phosphoprotein 32 family A, C-terminal	1
C06A8.9	Extracellular ligand-binding receptor	1
	Extracellular solute-binding protein, family 3	1
	Glutamate receptor, L-glutamate/glycine-binding	1
	Ionotropic glutamate receptor	1
C06B3.3	Cytochrome P450	1
	Cytochrome P450, conserved site	1
C06B3.4	Short-chain dehydrogenase/reductase SDR	1
	Short-chain dehydrogenase/reductase, conserved site	1
C06B3.5	Short-chain dehydrogenase/reductase SDR	1
	Short-chain dehydrogenase/reductase, conserved site	1
C06B3.8	Adenylyl cyclase class-3/4/guanylyl cyclase	1
	Adenylyl cyclase class-3/4/guanylyl cyclase, conserved site	1
	Haem NO binding	1
C06B8.8	Ribosomal protein L38e	1
C06C3.1	Ankyrin repeat	1
	Ankyrin repeat-containing domain	1
	Photosynthetic reaction centre, L/M	1
C06E1.10	DEAD-like helicase, N-terminal	1
	DNA/RNA helicase, ATP-dependent, DEAH-box type, conserved site	1
	DNA/RNA helicase, C-terminal	1
	Domain of unknown function DUF1605	1
	Helicase-associated domain	1
	Helicase, superfamily 1/2, ATP-binding domain	1
C06E1.3	Dual oxidase maturation factor	1
C06E1.4	Extracellular solute-binding protein, family 3	1
	Glutamate receptor, L-glutamate/glycine-binding	1
	Ionotropic glutamate receptor	1
C06E2.3	Ubiquitin-associated/translation elongation factor EF1B, N-terminal, eukaryote	1
	Ubiquitin-conjugating enzyme, E2	1
C06E2.7	Ubiquitin-associated/translation elongation factor EF1B, N-terminal	1
	Ubiquitin-associated/translation elongation factor EF1B, N-terminal, eukaryote	1
	Ubiquitin-conjugating enzyme, E2	1
C06E4.3	Short-chain dehydrogenase/reductase SDR	1
C06E4.6	Short-chain dehydrogenase/reductase SDR	1
	Short-chain dehydrogenase/reductase, conserved site	1
C06E7.1	S-adenosylmethionine synthetase	1
C06E7.3	S-adenosylmethionine synthetase	1
C06G1.5	EF-Hand 1, calcium-binding site	1
	EF-HAND 2	1
C06G3.10	COG complex component, COG2	1
C06G3.11	Mitochondrial inner membrane translocase complex, Tim8/9/10/13-zinc finger-like	1
C06G3.2	Kinesin, motor domain	1
C06G3.5	Adenosine deaminase	1
	Adenosine/AMP deaminase	1
C06G3.7	FAD dependent oxidoreductase	1
	FAD-dependent pyridine nucleotide-disulphide oxidoreductase	1
	Fumarate reductase/succinate dehydrogenase flavoprotein, N-terminal	1
	Glucose-inhibited division protein A-related	1
	Pyridine nucleotide-disulphide oxidoreductase, class I, active site	1
	Pyridine nucleotide-disulphide oxidoreductase, dimerisation	1
	Pyridine nucleotide-disulphide oxidoreductase, NAD-binding region	1
	Thioredoxin/glutathione reductase selenoprotein	1
C06G3.8	Nucleic acid binding, OB-fold, tRNA/helicase-type	1
C06G3.9	Protein of unknown function DUF2042	1
C06G4.2	Peptidase C2, calpain	1
	Peptidase, cysteine peptidase active site	1
C06G4.5	7TM GPCR, rhodopsin-like	1
	GPCR, rhodopsin-like superfamily	1
C06G8.1	MtN3/saliva-related transmembrane protein, conserved region	1
C06G8.2	Oligopeptide transporter	1
	Oligopeptide transporter, peptide:H+ symporter	1
	PTR2 family proton/oligopeptide symporter, conserved site	1
C06G8.3	Zinc/iron permease	1
C06H2.2	Lipid-binding START	1
C06H2.3	GCN5-related N-acetyltransferase	1
	Transcription factor jumonji	1
	Transcription factor jumonji/aspartyl beta-hydroxylase	1
C06H2.4	Reduced folate carrier	1
C07A12.3	Nuclear hormone receptor, ligand-binding, core	1
	Orphan nuclear receptor Fushi-tarazu factor 1	1
	Zinc finger, nuclear hormone receptor-type	1
C07A12.4	Disulphide isomerase	1
	Protein disulphide isomerase	1
	Thioredoxin domain	1
	Thioredoxin-like	1
	Thioredoxin, conserved site	1
C07A12.7	GAT	1
	Target of Myb protein 1	1
	VHS	1
	VHS subgroup	1
C07A4.1	RNA recognition motif, RNP-1	1
	RNA recognition, domain 1	1
C07A4.3	Allergen V5/Tpx-1 related	1
	Allergen V5/Tpx-1 related, conserved site	1
	SCP-like extracellular	1
C07A9.11	Sodium/calcium exchanger membrane region	1
C07A9.2	BUD31/G10-related, conserved site	1
	G10 protein	1
C07A9.3	Protein kinase, ATP binding site	1
	Protein kinase, catalytic domain	1
	Serine/threonine-protein kinase domain	1
	Serine/threonine-protein kinase-like domain	1
	Serine/threonine-protein kinase, active site	1
	Serine/threonine/tyrosine-protein kinase	1
	Tyrosine-protein kinase, catalytic domain	1
C07A9.4	Sodium/calcium exchanger membrane region	1
C07A9.8	Bestrophin-like	1
C07B5.4	Pleckstrin homology	1
C07B5.5	Deoxyribonuclease II	1
C07D10.2	BTB/POZ	1
	BTB/POZ-like	1
	MATH	1
C07D10.4	Metridin-like ShK toxin	1
	Peptidase M12A, astacin	1
	Peptidase M12A, nematode astacin 7/8	1
	Peptidase, metallopeptidase	1
C07D8.5	Aldo/keto reductase	1
C07D8.6	Aldo/keto reductase	1
	Aldo/keto reductase, conserved site	1
C07E3.1	D111/G-patch	1
C07E3.2	Uncharacterised protein family UPF0120	1
C07E3.9	Phospholipase A2, active site	1
	Phospholipase A2, eukaryotic	1
C07F11.1	Leucine-rich repeat	1
	Leucine-rich repeat, typical subtype	1
	Toll-Interleukin receptor	1
C07G1.1	Peptidase S1/S6, chymotrypsin/Hap	1
	Peptidase S1/S6, chymotrypsin/Hap, active site	1
C07G1.3	Protein kinase, ATP binding site	1
	Protein kinase, catalytic domain	1
	Serine/threonine-protein kinase domain	1
	Serine/threonine-protein kinase-like domain	1
	Serine/threonine-protein kinase, active site	1
	Serine/threonine/tyrosine-protein kinase	1
	Tyrosine-protein kinase, catalytic domain	1
C07G1.4	Actin-binding WH2	1
	EVH1	1
	PAK-box/P21-Rho-binding	1
C07G1.5	Ubiquitin binding protein, Hrs/VPS27	1
	Ubiquitin interacting motif	1
	VHS	1
	VHS subgroup	1
	Zinc finger, FYVE-related	1
	Zinc finger, FYVE-type	1
C07G1.8	Glutaredoxin	1
C07G2.2	Basic leucine zipper	1
	Basic-leucine zipper (bZIP) transcription factor	1
C07G2.3	Chaperonin Cpn60/TCP-1	1
	Chaperonin TCP-1, conserved site	1
	T-complex protein 1, epsilon subunit	1
C07H4.2	Chloride channel, voltage gated	1
	Cystathionine beta-synthase, core	1
C07H6.1	ATP dependent DNA ligase, central	1
	BRCT	1
C07H6.2	Protein phosphatase inhibitor	1
C07H6.3	HEAT	1
	HEAT, type 2	1
C07H6.4	RNA polymerase II, large subunit, CTD	1
	RNA recognition motif, RNP-1	1
	SWAP/Surp	1
C07H6.5	DEAD-like helicase, N-terminal	1
	DNA/RNA helicase, C-terminal	1
	DNA/RNA helicase, DEAD/DEAH box type, N-terminal	1
	Helicase, superfamily 1/2, ATP-binding domain	1
	RNA helicase, ATP-dependent, DEAD-box, conserved site	1
	RNA helicase, DEAD-box type, Q motif	1
C07H6.6	Telomere length regulation protein	1
C07H6.7	Homeobox	1
	Homeobox protein, antennapedia type, conserved site	1
	Homeobox, conserved site	1
C08A9.1	Manganese/iron superoxide dismutase	1
	Manganese/iron superoxide dismutase, binding site	1
	Manganese/iron superoxide dismutase, C-terminal	1
	Manganese/iron superoxide dismutase, N-terminal	1
C08B11.3	ARID/BRIGHT DNA-binding domain	1
	Zinc finger, C2H2-type	1
C08B11.5	RNA recognition motif, RNP-1	1
C08B11.6	Actin/actin-like	1
C08B11.7	Peptidase C12, ubiquitin carboxyl-terminal hydrolase 1	1
	Ubiquitinyl hydrolase, UCH37 type	1
C08B11.8	Glycosyltransferase, ALG6/ALG8	1
C08B6.1	Glycosyl transferase, family 28, C-terminal	1
	UDP-glucuronosyl/UDP-glucosyltransferase	1
C08B6.14	Metallophosphoesterase	1
C08B6.7	WD40 repeat	1
	WD40 repeat 2	1
	WD40 repeat, conserved site	1
	WD40 repeat, subgroup	1
	WD40-repeat-containing domain	1
C08B6.8	Exonuclease	1
	Exonuclease, RNase T/DNA polymerase III	1
C08B6.9	UBA/THIF-type NAD/FAD binding fold	1
C08C3.3	Homeobox	1
	Homeobox protein, antennapedia type, conserved site	1
	Homeobox, conserved site	1
C08D8.1	Major facilitator superfamily MFS-1	1
C08D8.2	Tropomodulin	1
C08E8.2	Strictosidine synthase, conserved region	1
C08F11.8	UDP-glucuronosyl/UDP-glucosyltransferase	1
C08F8.1	Prefoldin beta-like	1
C08F8.2	DEAD-like helicase, N-terminal	1
	DNA/RNA helicase, C-terminal	1
C08F8.4	Membrane bound O-acyl transferase, MBOAT	1
C08F8.6	Protein kinase, ATP binding site	1
	Protein kinase, catalytic domain	1
	Serine/threonine-protein kinase domain	1
	Serine/threonine-protein kinase-like domain	1
	Serine/threonine-protein kinase, active site	1
	Serine/threonine/tyrosine-protein kinase	1
C08F8.7	MIRO-like	1
	Ran GTPase	1
	Ras	1
	Ras small GTPase, Rab type	1
	Ras small GTPase, Ras type	1
	Small GTP-binding protein	1
	Small GTPase, Rho type	1
C08F8.8	Zinc finger, nuclear hormone receptor-type	1
C08G5.4	C2 calcium-dependent membrane targeting	1
	C2 membrane targeting protein	1
C08H9.1	Peptidase S10, serine carboxypeptidase	1
	Peptidase S10, serine carboxypeptidase, active site	1
C08H9.16	Folate-sensitive fragile site protein Fra10Ac1	1
C08H9.2	K Homology	1
	K Homology, type 1	1
	K Homology, type 1, subgroup	1
C08H9.3	Bifunctional dolichyl-P-Glc:Glc1Man9GlcNAc2-PP-dolichyl glucosyltransferase/endonuclease V	1
	Endonuclease V	1
	Glycosyltransferase, ALG6/ALG8	1
C08H9.5	Protein kinase, ATP binding site	1
	Protein kinase, catalytic domain	1
	Serine/threonine-protein kinase domain	1
	Serine/threonine-protein kinase-like domain	1
	Serine/threonine/tyrosine-protein kinase	1
	Tyrosine-protein kinase, active site	1
	Tyrosine-protein kinase, catalytic domain	1
C09B7.1	7TM GPCR, rhodopsin-like	1
	7TM GPCR, serpentine receptor class sx (Srsx)	1
	GPCR, rhodopsin-like superfamily	1
C09B8.1	Endonuclease/exonuclease/phosphatase	1
	Inositol polyphosphate related phosphatase	1
C09B8.4	Protein of unknown function DUF829, transmembrane 53	1
C09B8.6	Heat shock protein Hsp20	1
C09B8.7	PAK-box/P21-Rho-binding	1
	Protein kinase, ATP binding site	1
	Protein kinase, catalytic domain	1
	Serine/threonine-protein kinase domain	1
	Serine/threonine-protein kinase-like domain	1
	Serine/threonine-protein kinase, active site	1
	Serine/threonine/tyrosine-protein kinase	1
	Tyrosine-protein kinase, catalytic domain	1
C09B9.3	Bestrophin-like	1
C09D1.1	Carbohydrate kinase, FGGY, conserved site	1
	Dbl homology (DH) domain	1
	Fibronectin, type III	1
	Immunoglobulin subtype	1
	Immunoglobulin subtype 2	1
	Immunoglobulin V-set	1
	Immunoglobulin V-set, subgroup	1
	Immunoglobulin-like	1
	Pleckstrin homology	1
	Protein kinase, catalytic domain	1
	RCSD	1
	Serine/threonine-protein kinase domain	1
	Serine/threonine-protein kinase-like domain	1
	Serine/threonine/tyrosine-protein kinase	1
	Src homology-3 domain	1
	Tyrosine-protein kinase, catalytic domain	1
	Variant SH3	1
C09D4.1	Major facilitator superfamily MFS-1	1
C09D4.5	Ribosomal protein L19/L19e	1
C09D8.1	Dual-specific/protein-tyrosine phosphatase, conserved region	1
	Fibronectin, type III	1
	Immunoglobulin subtype	1
	Immunoglobulin subtype 2	1
	Immunoglobulin V-set	1
	Immunoglobulin-like	1
	Protein-tyrosine phosphatase, active site	1
	Protein-tyrosine phosphatase, catalytic	1
	Protein-tyrosine phosphatase, receptor/non-receptor type	1
C09E10.2	Diacylglycerol kinase, accessory domain	1
	Diacylglycerol kinase, catalytic domain	1
	Protein kinase C-like, phorbol ester/diacylglycerol binding	1
	Ras-association	1
	Zinc finger, PHD-finger	1
	Zinc finger, PHD-type	1
C09E7.5	Zinc finger, C3HC4 RING-type	1
	Zinc finger, RING-type	1
C09E7.8	Zinc finger, C3HC4 RING-type	1
	Zinc finger, RING-type	1
C09E7.9	Zinc finger, C3HC4 RING-type	1
	Zinc finger, RING-type	1
C09F5.2	Protein of unknown function DUF1650	1
C09F5.3	Zinc finger, C2H2-like	1
	Zinc finger, C2H2-type	1
C09F9.3	Ankyrin repeat	1
	Ankyrin repeat-containing domain	1
	Glutaminase, core	1
C09G12.1	Homeobox	1
C09G12.8	MIRO-like	1
	Ran GTPase	1
	Ras	1
	Ras small GTPase, Rab type	1
	Ras small GTPase, Ras type	1
	Small GTP-binding protein	1
	Small GTPase, Rho type	1
C09G12.9	Steadiness box	1
	Tumour susceptibility gene 101	1
C09G4.1	Longevity assurance, LAG1/LAC1	1
	TRAM/LAG1/CLN8 homology domain	1
C09G4.2	AGC-kinase, C-terminal	1
	Cyclic nucleotide-binding	1
	Cyclic nucleotide-binding, conserved site	1
	Protein kinase, ATP binding site	1
	Protein kinase, catalytic domain	1
	Serine/threonine-protein kinase domain	1
	Serine/threonine-protein kinase-like domain	1
	Serine/threonine-protein kinase, active site	1
	Serine/threonine/tyrosine-protein kinase	1
	Tyrosine-protein kinase, catalytic domain	1
C09G4.3	Cyclin-dependent kinase, regulatory subunit	1
C09G4.5	WD40 repeat	1
	WD40 repeat 2	1
	WD40 repeat, subgroup	1
	WD40-repeat-containing domain	1
C09G5.1	Neurotransmitter-gated ion-channel	1
	Neurotransmitter-gated ion-channel ligand-binding	1
	Neurotransmitter-gated ion-channel transmembrane domain	1
	Neurotransmitter-gated ion-channel, conserved site	1
C09G5.2	Diphthamide synthesis, DHP2	1
	Diphthamide synthesis, DPH1/DHP2	1
C09G5.3	Collagen triple helix repeat	1
	Nematode cuticle collagen, N-terminal	1
C09G5.4	Collagen triple helix repeat	1
	Nematode cuticle collagen, N-terminal	1
C09G5.5	Collagen triple helix repeat	1
	Nematode cuticle collagen, N-terminal	1
C09G5.6	Collagen triple helix repeat	1
	Nematode cuticle collagen, N-terminal	1
	Small acid-soluble spore protein, SspO	1
C09G9.2	WD40 repeat	1
	WD40 repeat, conserved site	1
C09G9.6	Fumarate lyase, conserved site	1
	Zinc finger, CCCH-type	1
C09H10.2	Ribosomal protein L44e	1
C09H10.3	NADH ubiquinone oxidoreductase, F subunit	1
	NADH ubiquinone oxidoreductase, F subunit, iron sulphur binding	1
	NADH:ubiquinone oxidoreductase, 51kDa subunit	1
	NADH:ubiquinone oxidoreductase, 51kDa subunit, conserved site	1
	Soluble ligand binding domain	1
C09H10.6	Tetratricopeptide repeat	1
	Tetratricopeptide, SHNi-TPR domain	1
C09H5.2	ATPase, P-type cation-transporter, C-terminal	1
	ATPase, P-type cation-transporter, N-terminal	1
	ATPase, P-type phosphorylation site	1
	ATPase, P-type, ATPase-associated domain	1
	ATPase, P-type, K/Mg/Cd/Cu/Zn/Na/Ca/Na/H-transporter	1
	Haloacid dehalogenase-like hydrolase	1
C09H6.1	Zinc finger, C2H2-like	1
	Zinc finger, C2H2-type	1
C09H6.2	PDZ/DHR/GLGF	1
	Phosphotyrosine interaction domain	1
C10A4.1	HAT dimerisation	1
C10C5.3	ArgE/DapE/ACY1/CPG2/YscS, conserved site	1
	N-acyl-L-amino-acid amidohydrolase	1
	Peptidase M20	1
	Peptidase M20, dimerisation	1
C10C5.4	ArgE/DapE/ACY1/CPG2/YscS, conserved site	1
	N-acyl-L-amino-acid amidohydrolase	1
	Peptidase M20	1
	Peptidase M20, dimerisation	1
C10C5.5	ArgE/DapE/ACY1/CPG2/YscS, conserved site	1
	N-acyl-L-amino-acid amidohydrolase	1
	Peptidase M20	1
	Peptidase M20, dimerisation	1
C10C6.1	Aminoglycoside phosphotransferase	1
	Domain of unknown function DUF1908	1
	PDZ/DHR/GLGF	1
	Protein kinase, catalytic domain	1
	Serine/threonine-protein kinase domain	1
	Serine/threonine-protein kinase-like domain	1
	Serine/threonine-protein kinase, active site	1
	Serine/threonine/tyrosine-protein kinase	1
	Tyrosine-protein kinase, catalytic domain	1
C10C6.2	7TM GPCR, rhodopsin-like	1
	GPCR, rhodopsin-like superfamily	1
C10C6.5	ABC transporter-like	1
	ABC transporter, conserved site	1
	ABC-2 type transporter	1
	ATPase, AAA+ type, core	1
C10C6.6	ATPase, P-type phosphorylation site	1
	ATPase, P-type, ATPase-associated domain	1
	ATPase, P-type, K/Mg/Cd/Cu/Zn/Na/Ca/Na/H-transporter	1
	ATPase, P-type, unknown pump specificity (type V)	1
	Haloacid dehalogenase-like hydrolase	1
C10E2.2	Cyclin-like F-box	1
	Zinc finger, TRAF-type	1
C10E2.3	Histone deacetylase superfamily	1
	Regulator of chromosome condensation, RCC1	1
C10E2.6	Major facilitator superfamily MFS-1	1
C10F3.2	Short-chain dehydrogenase/reductase SDR	1
	Short-chain dehydrogenase/reductase, conserved site	1
C10F3.3	Adenylyl cyclase class-3/4/guanylyl cyclase	1
	Adenylyl cyclase class-3/4/guanylyl cyclase, conserved site	1
C10F3.5	Methyltransferase small	1
	Protein-L-isoaspartate(D-aspartate) O-methyltransferase	1
C10F3.6	Alpha-(1,6)-fucosyltransferase, eukaryotic type	1
	Src homology-3 domain	1
	Variant SH3	1
C10G11.5	Eukaryotic pantothenate kinase	1
	Fumble	1
C10G6.1	3'-5' exonuclease	1
C10G8.5	Na-Ca exchanger/integrin-beta4	1
	Sodium/calcium exchanger membrane region	1
	Sodium/calcium exchanger protein	1
C10G8.7	Homeobox	1
	Homeobox, conserved site	1
C10H11.1	Gelsolin	1
	Gelsolin domain	1
	Villin headpiece	1
C10H11.3	Glycosyl transferase, family 28, C-terminal	1
	UDP-glucuronosyl/UDP-glucosyltransferase	1
C10H11.4	Glycosyl transferase, family 28, C-terminal	1
	UDP-glucuronosyl/UDP-glucosyltransferase	1
C10H11.5	UDP-glucuronosyl/UDP-glucosyltransferase	1
C10H11.6	UDP-glucuronosyl/UDP-glucosyltransferase	1
C10H11.8	WD40 repeat	1
	WD40 repeat 2	1
	WD40 repeat, conserved site	1
	WD40 repeat, subgroup	1
	WD40-repeat-containing domain	1
C10H11.9	AGC-kinase, C-terminal	1
	Protein kinase C-like, phorbol ester/diacylglycerol binding	1
	Protein kinase, ATP binding site	1
	Protein kinase, C-terminal	1
	Protein kinase, catalytic domain	1
	Serine/threonine-protein kinase domain	1
	Serine/threonine-protein kinase-like domain	1
	Serine/threonine-protein kinase, active site	1
	Serine/threonine/tyrosine-protein kinase	1
	Tyrosine-protein kinase, catalytic domain	1
C11D2.2	Peptidase A1	1
	Peptidase aspartic, active site	1
C11D2.4	Protein of unknown function DUF2419	1
C11D2.6	Ion transport	1
	Ribosomal protein S7, conserved site	1
C11D2.7	Pseudouridine synthase/archaeosine transglycosylase	1
	Translation machinery-associated RNA binding protein, predicted	1
	Uncharacterised domain 2	1
C11D9.1	Dbl homology (DH) domain	1
C11E4.1	Glutathione peroxidase	1
C11E4.2	Glutathione peroxidase	1
C11E4.6	Ankyrin repeat	1
	Ankyrin repeat-containing domain	1
	Phosphotyrosine interaction domain	1
	Sterile alpha motif	1
	Sterile alpha motif, type 1	1
	Sterile alpha motif, type 2	1
C11G6.1	Bromodomain transcription factor	1
C11G6.3	Zinc finger, PHD-finger	1
	Zinc finger, PHD-type	1
	Zinc finger, PHD-type, conserved site	1
C11H1.3	Zinc finger, C3HC4 RING-type	1
	Zinc finger, RING-type	1
C11H1.4	ATPase, AAA-type, conserved site	1
	ATPase, AAA-type, core	1
	ATPase, AAA+ type, core	1
	Peroxisome biogenesis factor 1, N-terminal	1
C12C8.1	Heat shock protein 70	1
	Heat shock protein 70, conserved site	1
C12C8.2	Cys/Met metabolism, pyridoxal phosphate-dependent enzyme	1
C12C8.3	B-box, C-terminal	1
	Filamin/ABP280 repeat	1
	Filamin/ABP280 repeat-like	1
	NHL repeat	1
	NHL repeat. subgroup	1
	Zinc finger, B-box	1
C12D12.2	Sodium:dicarboxylate symporter	1
	Sodium:dicarboxylate symporter, conserved site	1
C12D12.5	High mobility group, HMG1/HMG2	1
C12D5.7	Cytochrome P450	1
	Cytochrome P450, conserved site	1
C12D8.1	Domain of unknown function DUF1897	1
	K Homology	1
	K Homology, type 1	1
	K Homology, type 1, subgroup	1
C12D8.10	AGC-kinase, C-terminal	1
	Pleckstrin homology	1
	Protein kinase, ATP binding site	1
	Protein kinase, C-terminal	1
	Protein kinase, catalytic domain	1
	Serine/threonine-protein kinase domain	1
	Serine/threonine-protein kinase-like domain	1
	Serine/threonine-protein kinase, active site	1
	Serine/threonine/tyrosine-protein kinase	1
	Tyrosine-protein kinase, catalytic domain	1
C12D8.11	TROVE	1
C12D8.8	Collagen triple helix repeat	1
	Nematode cuticle collagen, N-terminal	1
C13B4.1	Cytochrome b561/ferric reductase transmembrane	1
	DOMON	1
	DOMON related	1
C13B4.2	Peptidase C19, ubiquitin carboxyl-terminal hydrolase 2	1
	Peptidase C19, ubiquitin carboxyl-terminal hydrolase 2, conserved site	1
	Ubiquitin	1
C13B9.2	MOFRL	1
C13B9.3	Clathrin adaptor, mu subunit, C-terminal	1
C13B9.4	GPCR, family 2-like	1
	GPCR, family 2, extracellular hormone receptor domain	1
	GPCR, family 2, secretin-like	1
	GPCR, family 2, secretin-like, conserved site	1
C13C4.4	HAD-superfamily hydrolase, subfamily IIA	1
	HAD-superfamily hydrolase, subfamily IIA, hypothetical 2	1
	Haloacid dehalogenase-like hydrolase	1
C13C4.5	Major facilitator superfamily MFS-1	1
C13D9.7	Sodium/calcium exchanger membrane region	1
C13D9.8	Sodium/calcium exchanger membrane region	1
C13D9.9	Glycosyl transferase, family 28, C-terminal	1
	UDP-glucuronosyl/UDP-glucosyltransferase	1
C13F10.2	Domain of unknown function KxDL	1
C13F10.5	Domain of unknown function SAYSvFN	1
C13G3.3	Protein phosphatase 2A, regulatory B subunit, B56	1
C13G5.1	Homeobox	1
	Homeobox, conserved site	1
C14A11.3	Dbl homology (DH) domain	1
	Pleckstrin homology	1
C14A11.7	MIRO-like	1
	Ran GTPase	1
	Ras	1
	Ras small GTPase, Rab type	1
	Ras small GTPase, Ras type	1
	Small GTP-binding protein	1
	Small GTPase, Rho type	1
C14A4.1	HEAT, type 2	1
	PBS lyase HEAT-like repeat	1
C14A4.10	Transcription initiation factor IID, 18kDa subunit	1
C14A4.11	Protein of unknown function DUF1241	1
C14A4.14	Ribosomal protein S22, mitochondrial	1
C14A4.2	Ribosomal protein S23/S29, mitochondrial	1
C14A4.3	Alg9-like mannosyltransferase	1
C14A4.4	3'-5' exonuclease	1
	Exosome-associated factor Rrp6, N-terminal	1
	Helicase/RNase D C-terminal, HRDC domain	1
C14A4.5	Exoribonuclease, phosphorolytic domain 1	1
C14A6.1	C-type lectin	1
C14B1.1	Disulphide isomerase	1
	Protein disulphide isomerase	1
	Thioredoxin domain	1
	Thioredoxin-like	1
	Thioredoxin, conserved site	1
C14B1.10	Methyltransferase type 11	1
	Oxoglutarate/iron-dependent oxygenase	1
C14B1.4	Guanine nucleotide-binding protein, beta subunit	1
	WD40 repeat	1
	WD40 repeat 2	1
	WD40 repeat, conserved site	1
	WD40 repeat, subgroup	1
	WD40-repeat-containing domain	1
C14B1.5	Diphthamide synthesis, DHP1	1
	Diphthamide synthesis, DPH1/DHP2	1
C14B9.1	Heat shock protein Hsp20	1
C14B9.2	Disulphide isomerase	1
	Protein disulphide isomerase	1
	Protein disulphide-isomerase A4	1
	Thioredoxin domain	1
	Thioredoxin-like	1
	Thioredoxin, conserved site	1
C14B9.4	POLO box duplicated domain	1
	Protein kinase, ATP binding site	1
	Protein kinase, catalytic domain	1
	Serine/threonine-protein kinase domain	1
	Serine/threonine-protein kinase-like domain	1
	Serine/threonine-protein kinase, active site	1
	Serine/threonine/tyrosine-protein kinase	1
	Tyrosine-protein kinase, catalytic domain	1
C14B9.6	MYB-like	1
	Myb, DNA-binding	1
	SANT, DNA-binding	1
	SANT, eukarya	1
C14B9.7	Ribosomal protein L21e	1
	Ribosomal protein L21e, conserved site	1
C14C10.1	Mitochondrial substrate/solute carrier	1
C14C11.3	Glycoside hydrolase, family 20, catalytic core	1
C14C11.6	DEAD-like helicase, N-terminal	1
	DNA/RNA helicase, C-terminal	1
	DNA/RNA helicase, DEAD/DEAH box type, N-terminal	1
	Helicase, superfamily 1/2, ATP-binding domain	1
	RNA helicase, ATP-dependent, DEAD-box, conserved site	1
C14E2.2	Aminotransferase, class I/II	1
C14F11.1	Aminotransferase, class I/II	1
	Aminotransferases, class-I, pyridoxal-phosphate-binding site	1
C14F11.2	Calponin-like actin-binding	1
	Leucine-rich repeat	1
	Leucine-rich repeat, typical subtype	1
C14F11.5	Heat shock protein Hsp20	1
C14F5.1	BNIP3	1
C14F5.4	Tricarboxylate/iron carrier	1
C14F5.5	SH2 motif	1
	Src homology-3 domain	1
	Variant SH3	1
C14H10.1	Zinc/iron permease	1
C15A11.1	Collagen triple helix repeat	1
	Nematode cuticle collagen, N-terminal	1
C15A11.5	Collagen triple helix repeat	1
	Nematode cuticle collagen, N-terminal	1
C15A11.6	Collagen triple helix repeat	1
	Nematode cuticle collagen, N-terminal	1
C15A7.2	Rhodopsin-like GPCR transmembrane domain	1
C15B12.1	FAD dependent oxidoreductase	1
C15B12.7	Cation efflux protein	1
	Lipocalin conserved site	1
C15B12.8	FAD dependent oxidoreductase	1
	Fumarate reductase/succinate dehydrogenase flavoprotein, N-terminal	1
	Glucose-inhibited division protein A-related	1
C15C6.4	Ribonuclease P/MRP, p29 subunit, eukaryotic	1
	Ribonuclease P/MRP, subunit p29, eukaryotic/archaeal	1
C15C7.1	Syntaxin/epimorphin, conserved site	1
	Target SNARE coiled-coil domain	1
C15C7.2	GRIP	1
C15C7.7	GDP-fucose protein O-fucosyltransferase	1
C15C8.2	PAS	1
	PAS fold-3	1
C15C8.3	Peptidase A1	1
C15C8.4	Alpha-2-macroglobulin RAP, C-terminal	1
C15F1.1	Domain of unknown function DUF1794	1
	Metridin-like ShK toxin	1
C15F1.4	Nucleotidyl transferase	1
C15F1.6	3-oxo-5-alpha-steroid 4-dehydrogenase, C-terminal	1
	Ubiquitin supergroup	1
C15F1.7	Superoxide dismutase, copper/zinc binding	1
	Superoxide dismutase, copper/zinc, binding site	1
C15H11.3	Nuclear transport factor 2, Eukaryote	1
	TAP, C-terminal	1
C15H11.4	Short-chain dehydrogenase/reductase SDR	1
C15H11.6	Nuclear transport factor 2, Eukaryote	1
C15H11.7	Proteasome, alpha-subunit, conserved site	1
	Proteasome, subunit alpha/beta	1
C15H11.8	Zinc finger, TFIIS-type	1
C15H11.9	Ribosomal biogenesis regulatory protein	1
C15H9.1	Alanine dehydrogenase/PNT, C-terminal	1
	Alanine dehydrogenase/PNT, N-terminal	1
	NAD(P) transhydrogenase, alpha subunit	1
	NAD(P) transhydrogenase, beta subunit	1
	Phosphopantetheine attachment site	1
C15H9.4	Predicted transmembrane/coiled-coil 2 protein	1
C15H9.5	Transmembrane receptor, eukaryota	1
C15H9.6	Heat shock protein 70	1
	Heat shock protein 70, conserved site	1
C15H9.7	Kynureninase	1
C15H9.8	Peroxin-3	1
	Phosphopantetheine attachment site	1
C16A11.2	Protein of unknown function DUF2037	1
C16A3.1	DEAD-like helicase, N-terminal	1
	DNA/RNA helicase, C-terminal	1
	Helicase, superfamily 1/2, ATP-binding domain	1
	SNF2-related	1
C16A3.10	Aminotransferase class-III	1
	Ornithine aminotransferase	1
C16A3.2	Dual specificity phosphatase, catalytic domain	1
	Dual specificity phosphatase, subgroup, catalytic domain	1
	Dual-specific/protein-tyrosine phosphatase, conserved region	1
	Protein-tyrosine phosphatase, active site	1
	Protein-tyrosine phosphatase, catalytic	1
C16A3.3	Ribosomal protein S1, RNA binding domain	1
	RNA-processing protein, HAT helix	1
	Tetratricopeptide repeat-containing	1
C16A3.4	Zinc finger, C2H2-like	1
	Zinc finger, C2H2-type	1
	Zinc finger, U1-type	1
C16A3.5	Complex 1 LYR protein	1
C16A3.6	Mak16 protein	1
C16A3.7	Single-stranded nucleic acid binding R3H	1
	Zinc finger, NF-X1-type	1
	Zinc finger, RING-type	1
C16A3.9	Ribosomal protein S13/S15, N-terminal	1
	Ribosomal protein S15	1
C16B8.1	Protein kinase, catalytic domain	1
	Serine/threonine-protein kinase domain	1
	Serine/threonine-protein kinase-like domain	1
	Serine/threonine/tyrosine-protein kinase	1
	Tyrosine-protein kinase, active site	1
	Tyrosine-protein kinase, catalytic domain	1
	WIF domain	1
C16C10.1	Mitochondrial substrate/solute carrier	1
C16C10.10	Glyoxalase/bleomycin resistance protein/dioxygenase	1
C16C10.12	ABC transporter-like	1
	ABC transporter, conserved site	1
	ABC-2 type transporter	1
	ATPase, AAA+ type, core	1
	Pigment precursor permease	1
C16C10.2	Small-subunit processome, Utp11	1
C16C10.4	Sin3 associated polypeptide p18	1
C16C10.5	Zinc finger, C3HC4 RING-type	1
	Zinc finger, RING-type	1
C16C10.6	Protein of unknown function DUF2040, coiled-coil	1
C16C10.7	Zinc finger, C3HC4 RING-type	1
	Zinc finger, RING-type	1
	Zinc finger, RING-type, conserved site	1
C16C10.8	Zinc finger, C2H2, LYAR-type	1
C16C2.1	Homeobox	1
	Homeobox, conserved site	1
C16C2.2	DEP domain	1
	G-protein, gamma-like subunit	1
	Regulator of G protein signalling	1
C16C2.3	Endonuclease/exonuclease/phosphatase	1
	Inositol polyphosphate related phosphatase	1
	RhoGAP	1
C16C2.4	BSD	1
C16C8.2	Haem peroxidase, animal	1
	Metridin-like ShK toxin	1
C16D6.2	7TM GPCR, rhodopsin-like	1
	7TM GPCR, serpentine receptor class sx (Srsx)	1
	GPCR, rhodopsin-like superfamily	1
C16D9.2	Fibronectin, type III	1
	Protein kinase, catalytic domain	1
	Serine/threonine-protein kinase domain	1
	Serine/threonine-protein kinase-like domain	1
	Serine/threonine/tyrosine-protein kinase	1
	Tyrosine-protein kinase, catalytic domain	1
C16E9.1	von Willebrand factor, type A	1
C16E9.2	Protein of unknown function DUF2045	1
C16H3.1	EF-HAND 2	1
C16H3.2	Galectin, carbohydrate recognition domain	1
C17C3.1	Acyl-CoA thioesterase	1
C17C3.12	Acyl-CoA dehydrogenase, conserved site	1
	Acyl-CoA dehydrogenase, N-terminal	1
	Acyl-CoA dehydrogenase, type 2, C-terminal	1
	Acyl-CoA oxidase/dehydrogenase, central domain	1
	Acyl-CoA oxidase/dehydrogenase, type 1	1
C17C3.3	Acyl-CoA thioesterase	1
C17D12.2	RNA recognition motif, RNP-1	1
C17D12.6	EGF	1
	EGF-like	1
	EGF-like calcium-binding	1
	EGF-like region, conserved site	1
	EGF-like, type 3	1
C17E4.3	Zinc finger, C3HC4 RING-type	1
	Zinc finger, RING-CH-type	1
C17E4.5	RNA recognition motif, RNP-1	1
C17E4.6	YL1 nuclear	1
	YL1 nuclear, C-terminal	1
C17E4.9	ATPase, P-type cation exchange, beta subunit	1
C17F4.8	BTB/POZ-like	1
	Potassium channel, voltage dependent, Kv, tetramerisation	1
C17G1.3	Glycosyl transferase, family 28, C-terminal	1
	UDP-glucuronosyl/UDP-glucosyltransferase	1
C17G1.7	Cysteine synthase A	1
	Cysteine synthase K/M	1
	Cysteine synthase/cystathionine beta-synthase P-phosphate-binding site	1
	Pyridoxal phosphate-dependent enzyme, beta subunit	1
C17G1.8	Tetraspanin	1
C17G10.1	Oxoglutarate/iron-dependent oxygenase	1
	Prolyl 4-hydroxylase, alpha subunit	1
	Short-chain dehydrogenase/reductase, conserved site	1
C17G10.2	Tetratricopeptide repeat	1
	Tetratricopeptide TPR-1	1
C17G10.4	Dual specificity phosphatase, catalytic domain	1
	Dual specificity phosphatase, subgroup, catalytic domain	1
	Dual-specific/protein-tyrosine phosphatase, conserved region	1
	Protein-tyrosine phosphatase, active site	1
	Protein-tyrosine phosphatase, receptor/non-receptor type	1
	Zinc finger, C2CH-type	1
C17G10.8	Short-chain dehydrogenase/reductase SDR	1
	Sterol-binding	1
C17G10.9	RNA polymerase I-associated factor PAF67	1
C17H11.6	Zinc finger, C3HC4 RING-type	1
	Zinc finger, C6HC-type	1
	Zinc finger, RING-type	1
C17H12.1	WD40 repeat	1
	WD40 repeat 2	1
	WD40 repeat, subgroup	1
	WD40-repeat-containing domain	1
C17H12.14	ATPase, V1/A1 complex, subunit E	1
C17H12.2	Protein of unknown function DUF2152	1
C17H12.9	ATPase, F1/V1/A1 complex, alpha/beta subunit, nucleotide-binding domain, active site	1
	Homeobox	1
	Homeodomain protein CUT	1
C18A3.1	DNA methylase, N-6 adenine-specific, conserved site	1
	MT-A70	1
C18A3.3	Eukaryotic rRNA processing	1
C18A3.5	RNA recognition motif, RNP-1	1
	RNA recognition, domain 1	1
C18A3.6	MIRO-like	1
	Ran GTPase	1
	Ras	1
	Ras small GTPase, Rab type	1
	Ras small GTPase, Ras type	1
	Small GTP-binding protein	1
	Small GTPase, Rho type	1
C18A3.8	Helix-loop-helix DNA-binding domain	1
C18B12.2	GPCR, family 2-like	1
	GPCR, family 2, extracellular hormone receptor domain	1
	GPCR, family 2, secretin-like	1
	GPCR, family 2, secretin-like, conserved site	1
C18B12.3	Homeobox	1
	Homeobox, conserved site	1
C18B12.4	Zinc finger, C3HC4 RING-type	1
	Zinc finger, RING-type	1
C18B12.6	Protein of unknown function DUF1692	1
C18B2.4	GRAM	1
	WW-domain-binding protein	1
C18B2.6	Na+ channel, amiloride-sensitive	1
C18C4.10	Kinesin light chain repeat	1
	Rabaptin, GTPase-Rab5 binding	1
	Tetratricopeptide repeat	1
	Tetratricopeptide repeat-containing	1
	Tetratricopeptide TPR-1	1
	Tetratricopeptide TPR-3	1
C18C4.2	ABC transporter integral membrane type 1	1
	ABC transporter-like	1
	Beta-lactamase, class A/D	1
	NADPH-dependent FMN reductase	1
C18C4.3	Aminoacyl-tRNA synthetase, class I, conserved site	1
	Glycosyl transferase, family 28, C-terminal	1
	UDP-glucuronosyl/UDP-glucosyltransferase	1
C18D11.2	Acyl-CoA-binding protein, ACBP	1
C18D11.4	RNA recognition motif, RNP-1	1
C18E3.2	SWIB domain	1
	SWIB/MDM2 domain	1
C18E3.5	WD40 repeat	1
	WD40 repeat 2	1
	WD40 repeat, conserved site	1
	WD40 repeat, subgroup	1
	WD40-repeat-containing domain	1
C18E3.6	Adenylate cyclase-associated CAP, C-terminal	1
	Adenylate cyclase-associated CAP, N-terminal	1
	C-CAP/cofactor C-like domain	1
	CARP motif	1
C18E3.8	Peptidase A22, presenilin signal peptide	1
	Peptidase A22A, presenilin	1
C18E9.11	Torsin	1
	Torsin, subgroup	1
C18E9.2	Translocation protein Sec62	1
C18E9.6	Porin, eukaryotic type	1
C18F10.7	Ankyrin repeat	1
	Ankyrin repeat-containing domain	1
	Ubiquitin interacting motif	1
C18F3.2	Fibronectin, type III	1
	Immunoglobulin subtype	1
	Immunoglobulin subtype 2	1
	Immunoglobulin-like	1
C18G1.5	Histone H1/H5	1
C18H7.1	von Willebrand factor, type A	1
C18H7.3	Collagen triple helix repeat	1
	Nematode cuticle collagen, N-terminal	1
C18H7.4	Protein kinase, ATP binding site	1
	Protein kinase, catalytic domain	1
	Serine/threonine-protein kinase domain	1
	Serine/threonine-protein kinase-like domain	1
	Serine/threonine/tyrosine-protein kinase	1
	SH2 motif	1
	Tyrosine-protein kinase, active site	1
	Tyrosine-protein kinase, catalytic domain	1
C18H9.3	GYF	1
C18H9.7	Rapsyn, myristoylation/linker region, N-terminal	1
	Tetratricopeptide repeat	1
	Tetratricopeptide repeat-containing	1
	Zinc finger, C3HC4 RING-type	1
	Zinc finger, PHD-type	1
	Zinc finger, RING-like	1
	Zinc finger, RING-type	1
C23F12.1	Calponin-like actin-binding	1
	Filamin/ABP280 repeat	1
	Filamin/ABP280 repeat-like	1
	Immunoglobulin/major histocompatibility complex, conserved site	1
C23G10.2	Endoribonuclease L-PSP	1
	YjgF-like protein	1
	YjgF-like protein, conserved site	1
C23G10.3	K Homology, type 2	1
	Ribosomal protein S3, C-terminal	1
	Ribosomal protein S3, conserved site	1
	Ribosomal protein S3, eukaryotic/archaeal	1
C23G10.4	26S proteasome regulatory complex, non-ATPase subcomplex, Rpn2/Psmd1 subunit	1
C23G10.6	UDP-glucuronosyl/UDP-glucosyltransferase	1
C23G10.7	AdoMet-dependent methyltransferase, predicted	1
C23H3.3	K Homology	1
	K Homology, type 1, subgroup	1
	Predicted eukaryotic LigT	1
C23H3.4	Aminotransferase, class I/II	1
C23H3.7	Glycoside hydrolase, family 37	1
	Glycoside hydrolase, family 37, conserved site	1
C23H4.1	Neural proliferation differentiation control-1	1
C23H4.6	RecF/RecN/SMC protein, N-terminal	1
C23H5.2	Globin, subset	1
C23H5.7	Cyclic nucleotide-binding	1
	Ion transport	1
C24A1.2	Ets	1
C24A1.3	Ankyrin repeat	1
	Ankyrin repeat-containing domain	1
	Protein kinase, ATP binding site	1
	Protein kinase, catalytic domain	1
	Serine/threonine-protein kinase domain	1
	Serine/threonine-protein kinase-like domain	1
	Serine/threonine/tyrosine-protein kinase	1
	Tyrosine-protein kinase, catalytic domain	1
C24A11.8	Band 4.1 domain	1
	FERM adjacent (FA)	1
	FERM central domain	1
	FERM domain	1
	FERM, N-terminal	1
C24A11.9	Polyprenyl synthetase	1
C24A3.4	Aldehyde dehydrogenase, conserved site	1
	CoA-transferase family III	1
C24A3.6	Ion transport 2	1
C24A8.1	7TM GPCR, rhodopsin-like	1
	GPCR, rhodopsin-like superfamily	1
C24A8.4	Protein kinase, ATP binding site	1
	Protein kinase, catalytic domain	1
	Serine/threonine-protein kinase domain	1
	Serine/threonine-protein kinase-like domain	1
	Serine/threonine/tyrosine-protein kinase	1
	Tyrosine-protein kinase, catalytic domain	1
C24A8.6	7TM GPCR, rhodopsin-like	1
	GPCR, rhodopsin-like superfamily	1
C24B5.2	ATPase, AAA-5	1
	ATPase, AAA-type, conserved site	1
	ATPase, AAA-type, core	1
	ATPase, AAA+ type, core	1
C24B5.3	Patched	1
	Phosphopantetheine attachment site	1
	Sterol-sensing 5TM box	1
C24B5.4	Domain of unknown function DUF1907	1
C24F3.1	TRAM/LAG1/CLN8 homology domain	1
	TRAM1-like protein	1
	Translocation associated membrane protein	1
C24F3.2	Dual specificity phosphatase, catalytic domain	1
	Dual specificity phosphatase, subgroup, catalytic domain	1
	Dual-specific/protein-tyrosine phosphatase, conserved region	1
	Tyrosine protein phosphatase, dual specificity, 12	1
C24F3.3	Metridin-like ShK toxin	1
	Peptidase M12A, astacin	1
	Peptidase, metallopeptidase	1
C24F3.4	Glutamine-dependent NAD(+) synthetase, GAT domain-containing	1
	NAD+ synthase	1
	Nitrilase/cyanide hydratase and apolipoprotein N-acyltransferase	1
C24F3.6	Collagen triple helix repeat	1
	Nematode cuticle collagen, N-terminal	1
C24G6.6	Amine oxidase	1
	FAD dependent oxidoreductase	1
C24G6.8	Peptidyl-tRNA hydrolase, PTH2	1
	Ubiquitin-associated/translation elongation factor EF1B, N-terminal	1
	Ubiquitin-associated/translation elongation factor EF1B, N-terminal, eukaryote	1
C24G7.1	Na+ channel, amiloride-sensitive	1
C24G7.2	Na+ channel, amiloride-sensitive	1
C24G7.4	Na+ channel, amiloride-sensitive	1
C24H10.5	Calcium-binding EF-hand	1
	EF-Hand 1, calcium-binding site	1
	EF-HAND 2	1
	EF-Hand, Calmodulin	1
C24H11.3	Transcription factor, T-box	1
	Transcription factor, T-box, conserved site	1
C24H11.6	Peptidase S24/S26A/S26B, conserved region	1
	Peptidase S26A, signal peptidase I	1
C24H11.7	SEC7-like	1
C24H11.8	Ion transport 2	1
C24H12.4	DEAD-like helicase, N-terminal	1
[truncated: 15,510 more rows]

## Sheet: B) domain-focused report
Count of Gene ID
Interpro Description	Gene ID	Total
(Uracil-5)-methyltransferase	H24K24.4	1
(Uracil-5)-methyltransferase Total		1
[2Fe-2S]-binding	B0222.9	1
	F15E6.6	1
	F55B11.1	1
[2Fe-2S]-binding Total		3
1-(5-Phosphoribosyl)-5-amino-4-imidazole-carboxylate (AIR) carboxylase	B0286.3	1
1-(5-Phosphoribosyl)-5-amino-4-imidazole-carboxylate (AIR) carboxylase Total		1
1-acyl-sn-glycerol-3-phosphate acyltransferase	F59F4.4	1
	T06E8.1	1
1-acyl-sn-glycerol-3-phosphate acyltransferase Total		2
10-formyltetrahydrofolate dehydrogenase	F36H1.6	1
10-formyltetrahydrofolate dehydrogenase Total		1
14-3-3 protein	F52D10.3	1
	M117.2	1
14-3-3 protein Total		2
2-5-oligoadenylate synthetase, ubiquitin-like domain	R11H6.5	1
2-5-oligoadenylate synthetase, ubiquitin-like domain Total		1
2-amino-3-ketobutyrate coenzyme A ligase	T25B9.1	1
2-amino-3-ketobutyrate coenzyme A ligase Total		1
2-oxo acid dehydrogenase, lipoyl-binding site	F23B12.5	1
	F42G8.6	1
	W02F12.5	1
	Y37D8A.13	1
	ZK669.4	1
2-oxo acid dehydrogenase, lipoyl-binding site Total		5
2-oxoacid dehydrogenase acyltransferase, catalytic domain	C30H6.7	1
	F23B12.5	1
	W02F12.5	1
	ZK669.4	1
2-oxoacid dehydrogenase acyltransferase, catalytic domain Total		4
2-oxoglutarate dehydrogenase, E1 component	T22B11.5	1
	ZK836.2	1
2-oxoglutarate dehydrogenase, E1 component Total		2
2-phosphoglycolate phosphatase, eukaryotic	C53A3.2	1
	F44E7.2	1
	K02D10.1	1
	K09H11.7	1
2-phosphoglycolate phosphatase, eukaryotic Total		4
2-thiocytidine tRNA biosynthesis protein, TtcA	F29C4.6	1
2-thiocytidine tRNA biosynthesis protein, TtcA Total		1
2,3-diketo-5-methylthio-1-phosphopentane phosphatase	F58H1.3	1
2,3-diketo-5-methylthio-1-phosphopentane phosphatase Total		1
23S ribosomal RNA methyltransferase	F45G2.9	1
23S ribosomal RNA methyltransferase Total		1
26S proteasome complex ubiquitin receptor, subunit Rpn13	C56G2.7	1
26S proteasome complex ubiquitin receptor, subunit Rpn13 Total		1
26S proteasome regulatory complex, non-ATPase subcomplex, Rpn1 subunit	T22D1.9	1
26S proteasome regulatory complex, non-ATPase subcomplex, Rpn1 subunit Total		1
26S proteasome regulatory complex, non-ATPase subcomplex, Rpn2/Psmd1 subunit	C23G10.4	1
26S proteasome regulatory complex, non-ATPase subcomplex, Rpn2/Psmd1 subunit Total		1
26S proteasome regulatory subunit, C-terminal	C30C11.2	1
26S proteasome regulatory subunit, C-terminal Total		1
26S proteasome subunit P45	C52E4.4	1
	F23F1.8	1
	F23F12.6	1
	F29G9.5	1
	F56F11.4	1
	F56H1.4	1
	Y49E10.1	1
26S proteasome subunit P45 Total		7
26S proteasome, regulatory subunit Rpn7	F49C12.8	1
	Y59A8A.1	1
26S proteasome, regulatory subunit Rpn7 Total		2
2Fe-2S ferredoxin, iron-sulphur binding site	B0222.9	1
	C04G2.6	1
	D2013.2	1
	F15E6.6	1
	F42A8.2	1
	F55B11.1	1
	Y69A2AR.29	1
2Fe-2S ferredoxin, iron-sulphur binding site Total		7
3-hydroxyacyl-CoA dehydrogenase, C-terminal	B0272.3	1
	C29F3.1	1
	F01G10.2	1
	F01G10.3	1
	F54C8.1	1
	T08B2.7	1
	Y71F9B.9	1
3-hydroxyacyl-CoA dehydrogenase, C-terminal Total		7
3-hydroxyacyl-CoA dehydrogenase, conserved site	B0272.3	1
	F54C8.1	1
	Y71F9B.9	1
3-hydroxyacyl-CoA dehydrogenase, conserved site Total		3
3-hydroxyacyl-CoA dehydrogenase, NAD binding	B0272.3	1
	C29F3.1	1
	F01G10.2	1
	F01G10.3	1
	F54C8.1	1
	T08B2.7	1
	Y71F9B.9	1
3-hydroxyacyl-CoA dehydrogenase, NAD binding Total		7
3-hydroxyanthranilate 3, 4-dioxygenase, metazoan	K06A4.5	1
3-hydroxyanthranilate 3, 4-dioxygenase, metazoan Total		1
3-hydroxyanthranilic acid dioxygenase	K06A4.5	1
3-hydroxyanthranilic acid dioxygenase Total		1
3-hydroxyisobutyrate dehydrogenase	B0250.5	1
3-hydroxyisobutyrate dehydrogenase Total		1
3-hydroxyisobutyrate dehydrogenase-related, conserved site	B0250.5	1
3-hydroxyisobutyrate dehydrogenase-related, conserved site Total		1
3-oxo-5-alpha-steroid 4-dehydrogenase	F19H6.4	1
	F42F12.3	1
	ZK1251.3	1
3-oxo-5-alpha-steroid 4-dehydrogenase Total		3
3-oxo-5-alpha-steroid 4-dehydrogenase, C-terminal	B0024.13	1
	C15F1.6	1
	F19H6.4	1
	F42F12.3	1
	ZK1251.3	1
3-oxo-5-alpha-steroid 4-dehydrogenase, C-terminal Total		5
3-oxoacid CoA-transferase	C05C10.3	1
3-oxoacid CoA-transferase Total		1
3-oxoacid CoA-transferase, subunit A	C05C10.3	1
3-oxoacid CoA-transferase, subunit A Total		1
3-oxoacid CoA-transferase, subunit B	C05C10.3	1
3-oxoacid CoA-transferase, subunit B Total		1
3'-5' exonuclease	C10G6.1	1
	C14A4.4	1
	Y57A10A.13	1
	ZK1098.3	1
	ZK1098.8	1
3'-5' exonuclease Total		5
3'5'-cyclic nucleotide phosphodiesterase	C32E12.2	1
	E01F3.1	1
	R08D7.6	1
	R153.1	1
	T04D3.3	1
	Y95B8A.10	1
3'5'-cyclic nucleotide phosphodiesterase Total		6
3'5'-cyclic nucleotide phosphodiesterase N-terminal	T04D3.3	1
3'5'-cyclic nucleotide phosphodiesterase N-terminal Total		1
4-aminobutyrate aminotransferase, eukaryotic	K04D7.3	1
4-aminobutyrate aminotransferase, eukaryotic Total		1
4-diphosphocytidyl-2C-methyl-D-erythritol synthase, conserved site	Y6B3B.5	1
4-diphosphocytidyl-2C-methyl-D-erythritol synthase, conserved site Total		1
4-hydroxybenzoate polyprenyl transferase	F57B9.4	1
4-hydroxybenzoate polyprenyl transferase Total		1
4-hydroxyphenylpyruvate dioxygenase	C31H2.4	1
	T21C12.2	1
4-hydroxyphenylpyruvate dioxygenase Total		2
4'-phosphopantetheinyl transferase	T04G9.4	1
	T28H10.1	1
4'-phosphopantetheinyl transferase Total		2
4Fe-4S ferredoxin, iron-sulphur binding, conserved site	C25F6.3	1
	F42A8.2	1
	T20H4.5	1
	Y39E4B.1	1
4Fe-4S ferredoxin, iron-sulphur binding, conserved site Total		4
4Fe-4S ferredoxin, iron-sulpur binding domain	C05D11.12	1
	C25F6.3	1
	F42A8.2	1
	K10D2.3	1
	T20H4.5	1
	Y39E4B.1	1
4Fe-4S ferredoxin, iron-sulpur binding domain Total		6
5-AMP-activated protein kinase, beta subunit, interaction domain	F55F3.1	1
	Y47D3A.15	1
5-AMP-activated protein kinase, beta subunit, interaction domain Total		2
5-formyltetrahydrofolate cyclo-ligase	Y106G6E.4	1
5-formyltetrahydrofolate cyclo-ligase Total		1
5-methyltetrahydrofolate--homocysteine methyltransferase	R03D7.1	1
5-methyltetrahydrofolate--homocysteine methyltransferase Total		1
5'-3' exonuclease, SAM-fold domain	Y47G6A.8	1
5'-3' exonuclease, SAM-fold domain Total		1
5'-3' exoribonuclease 1	Y39G8C.1	1
5'-3' exoribonuclease 1 Total		1
5'-3' exoribonuclease 2	Y48B6A.3	1
5'-3' exoribonuclease 2 Total		1
6-phosphofructo-2-kinase	K02B2.1	1
	Y110A7A.6	1
6-phosphofructo-2-kinase Total		2
6-phosphofructokinase, eukaryotic type	C50F4.2	1
	Y71H10A.1	1
6-phosphofructokinase, eukaryotic type Total		2
6-phosphogluconate dehydrogenase, C-terminal	T25B9.9	1
6-phosphogluconate dehydrogenase, C-terminal Total		1
6-phosphogluconate dehydrogenase, decarboxylating	T25B9.9	1
6-phosphogluconate dehydrogenase, decarboxylating Total		1
6-phosphogluconate dehydrogenase, NAD-binding	B0250.5	1
	T25B9.9	1
6-phosphogluconate dehydrogenase, NAD-binding Total		2
6-phosphogluconate-binding site	T25B9.9	1
6-phosphogluconate-binding site Total		1
6-phosphogluconolactonase	Y57G11C.3	1
6-phosphogluconolactonase Total		1
6-pyruvoyl tetrahydropterin synthase	B0041.6	1
6-pyruvoyl tetrahydropterin synthase Total		1
6-pyruvoyl tetrahydropterin synthase-related	B0041.6	1
6-pyruvoyl tetrahydropterin synthase-related Total		1
7TM GPCR , serpentine receptor class e (Sre), Nematode	D2023.1	1
7TM GPCR , serpentine receptor class e (Sre), Nematode Total		1
7TM GPCR , serpentine receptor class g (Srg), Nematode	F09E5.4	1
7TM GPCR , serpentine receptor class g (Srg), Nematode Total		1
7TM GPCR, rhodopsin-like	B0334.6	1
	C02D4.2	1
	C06G4.5	1
	C09B7.1	1
	C10C6.2	1
	C16D6.2	1
	C24A8.1	1
	C24A8.6	1
	C25G6.5	1
	C27B7.4	1
	C30F12.6	1
	C38C10.1	1
	C39E6.6	1
	C43C3.2	1
	C48C5.1	1
	C49A9.7	1
	C50H2.1	1
	C52B11.3	1
	C53C7.1	1
	F01E11.5	1
	F02E8.2	1
	F14D12.6	1
	F14F4.1	1
	F15A8.5	1
	F16D3.7	1
	F26A3.3	1
	F35G8.1	1
	F41E7.3	1
	F54D7.3	1
	F55E10.7	1
	F56B6.5	1
	F59C12.2	1
	F59D12.1	1
	K02F2.6	1
	K09G1.4	1
	K10B4.4	1
	M03F4.3	1
	R106.2	1
	T02D1.6	1
	T02E9.1	1
	T02E9.3	1
	T05A1.1	1
	T07D10.2	1
	T07D4.1	1
	T14E8.3	1
	T21B4.4	1
	T22D1.12	1
	T23B3.4	1
	T23C6.5	1
	W05B5.2	1
	Y116A8B.5	1
	Y22D7AR.13	1
	Y39A3B.5	1
	Y40H4A.1	1
	Y49C4A.5	1
	Y54E2A.1	1
	Y58G8A.4	1
	Y59C2A.1	1
	Y59H11AL.1	1
	Y81G3A.3	1
	ZC412.1	1
	ZK455.3	1
7TM GPCR, rhodopsin-like Total		62
7TM GPCR, serpentine receptor class sx (Srsx)	C02D4.2	1
	C09B7.1	1
	C16D6.2	1
	C25E10.3	1
	C25G6.5	1
	C30F12.6	1
	C38C10.1	1
	C39E6.6	1
	C52B11.3	1
	F01E11.5	1
	F02E8.2	1
	F14D12.6	1
	F14F4.1	1
	F15A8.5	1
	F16D3.7	1
	F35G8.1	1
	F41E7.3	1
	F56B6.5	1
	F59C12.2	1
	K02F2.6	1
	K09G1.4	1
	M03F4.3	1
	R106.2	1
	T02E9.3	1
	T05A1.1	1
	T07D4.1	1
	T14E8.3	1
	T21B4.4	1
	T23C6.5	1
	Y116A8B.5	1
	Y22D7AR.13	1
	Y39A3B.5	1
	Y40H4A.1	1
	Y54E2A.1	1
	Y59H11AL.1	1
	ZC412.1	1
	ZK455.3	1
7TM GPCR, serpentine receptor class sx (Srsx) Total		37
7TM GPCR, serpentine receptor class v (Srv), Nematode	C02D4.2	1
	F14D12.6	1
	F14F4.1	1
7TM GPCR, serpentine receptor class v (Srv), Nematode Total		3
7TM GPCR, serpentine receptor class w (Srw)	B0334.6	1
	C25G6.5	1
	C30F12.6	1
	F14F4.1	1
	F56B6.5	1
	K02F2.6	1
	T02E9.3	1
	T07D4.1	1
	T23C6.5	1
	ZK455.3	1
7TM GPCR, serpentine receptor class w (Srw) Total		10
7TM GPCR, serpentine receptor class x (Srx)	C30F12.6	1
	C38C10.1	1
	F02E8.2	1
	F15A8.5	1
	F35G8.1	1
	K09G1.4	1
	K10B4.4	1
	W05B5.2	1
	Y49C4A.5	1
	ZK455.3	1
7TM GPCR, serpentine receptor class x (Srx) Total		10
A-kinase anchoring protein 95 (AKAP95)	Y18D10A.25	1
A-kinase anchoring protein 95 (AKAP95) Total		1
A-macroglobulin complement component	ZK337.1	1
A-macroglobulin complement component Total		1
AAR2	F10B5.2	1
AAR2 Total		1
AARP2CN	F10G7.1	1
	Y61A9LA.10	1
AARP2CN Total		2
AB-hydrolase YheT, putative	C44C1.5	1
	Y60A3A.7	1
AB-hydrolase YheT, putative Total		2
AB-hydrolase-associated lipase region	F01G10.7	1
	F46B6.8	1
	F54F3.3	1
	K04A8.5	1
	R11G11.14	1
	Y57E12B.3	1
	ZK6.7	1
AB-hydrolase-associated lipase region Total		7
ABC transporter integral membrane type 1	C05A9.1	1
	C18C4.2	1
	C30H6.6	1
	C34G6.4	1
	C44B7.8	1
	C44B7.9	1
	C47A10.1	1
	C54D1.1	1
	C54G10.3	1
	DH11.3	1
	E03G2.2	1
	F14F4.3	1
	F20B6.3	1
	F21G4.2	1
	F22E10.1	1
	F22E10.2	1
	F22E10.3	1
	F42E11.1	1
	F43E2.4	1
	F57A10.3	1
	F57C12.4	1
	F57C12.5	1
	K08E7.9	1
	T02D1.5	1
	T10H9.5	1
	T21E8.1	1
	T21E8.2	1
	T21E8.3	1
	W04C9.1	1
	W09D6.6	1
	Y43F8C.12	1
	Y48G8AL.11	1
	Y50E8A.16	1
	Y57G11C.1	1
	Y74C10AR.3	1
	Y75B8A.26	1
	ZK455.7	1
	ZK484.2	1
ABC transporter integral membrane type 1 Total		38
ABC transporter-like	C05A9.1	1
	C05D10.3	1
	C10C6.5	1
	C16C10.12	1
	C18C4.2	1
	C30H6.6	1
	C34G6.4	1
	C44B7.8	1
	C44B7.9	1
	C47A10.1	1
	C48B4.4	1
	C54D1.1	1
	C54G10.3	1
	C56E6.5	1
	DH11.3	1
	E03G2.2	1
	F02E11.1	1
	F12B6.1	1
	F14F4.3	1
	F18E2.2	1
	F19B6.4	1
	F20B6.3	1
	F21G4.2	1
	F22E10.1	1
	F22E10.2	1
	F22E10.3	1
	F42A10.1	1
	F42E11.1	1
	F43E2.4	1
	F56F4.6	1
	F57A10.3	1
	F57C12.4	1
	F57C12.5	1
	K08E7.9	1
	T02D1.5	1
	T10H9.5	1
	T21E8.1	1
	T21E8.2	1
	T21E8.3	1
	T26A5.1	1
	T27E9.7	1
	W04C9.1	1
	W09D6.6	1
	Y39D8C.1	1
	Y39E4B.1	1
	Y42G9A.6	1
	Y43F8C.12	1
	Y47D3A.11	1
	Y48G8AL.11	1
	Y50E8A.16	1
	Y53C10A.9	1
	Y57G11C.1	1
	Y74C10AR.3	1
	Y75B8A.26	1
	ZK455.7	1
	ZK484.2	1
ABC transporter-like Total		56
ABC transporter, conserved site	C05A9.1	1
	C10C6.5	1
	C16C10.12	1
	C30H6.6	1
	C34G6.4	1
	C44B7.8	1
	C44B7.9	1
	C47A10.1	1
	C48B4.4	1
	C54D1.1	1
	C54G10.3	1
	DH11.3	1
	E03G2.2	1
	F12B6.1	1
	F14F4.3	1
	F18E2.2	1
	F20B6.3	1
	F21G4.2	1
	F22E10.1	1
	F22E10.2	1
	F22E10.3	1
	F42A10.1	1
	F42E11.1	1
	F43E2.4	1
	F57A10.3	1
	F57C12.4	1
	F57C12.5	1
	K08E7.9	1
	M106.1	1
	M7.5	1
	T02D1.5	1
	T10H9.5	1
	T21E8.1	1
	T21E8.2	1
	T21E8.3	1
	T26A5.1	1
	T27E9.7	1
	W04C9.1	1
	W09D6.6	1
	Y18D10A.19	1
	Y39D8C.1	1
	Y39E4B.1	1
	Y42G9A.6	1
	Y43F8C.12	1
	Y47D3A.11	1
	Y47D3A.26	1
	Y48G8AL.11	1
	Y50E8A.16	1
	Y53C10A.9	1
	Y57G11C.1	1
	Y74C10AR.3	1
	Y75B8A.26	1
	ZK455.7	1
	ZK484.2	1
	ZK792.1	1
ABC transporter, conserved site Total		55
ABC transporter, N-terminal	C44B7.8	1
	C44B7.9	1
	C54G10.3	1
	T02D1.5	1
	T10H9.5	1
ABC transporter, N-terminal Total		5
ABC transporter, transmembrane domain	C05A9.1	1
	C30H6.6	1
	C34G6.4	1
	C47A10.1	1
	C54D1.1	1
	DH11.3	1
	E03G2.2	1
	F14F4.3	1
	F20B6.3	1
	F21G4.2	1
	F22E10.1	1
	F22E10.2	1
	F22E10.3	1
	F42E11.1	1
	F43E2.4	1
	F57A10.3	1
	F57C12.4	1
	F57C12.5	1
	K08E7.9	1
	T21E8.1	1
	T21E8.2	1
	T21E8.3	1
	W04C9.1	1
	W09D6.6	1
	Y43F8C.12	1
	Y48G8AL.11	1
	Y50E8A.16	1
	Y57G11C.1	1
	Y74C10AR.3	1
	Y75B8A.26	1
	ZK455.7	1
	ZK484.2	1
ABC transporter, transmembrane domain Total		32
ABC-1	C35D10.4	1
	D2023.6	1
	Y32H12A.7	1
ABC-1 Total		3
ABC-2 type transporter	C05D10.3	1
	C10C6.5	1
	C16C10.12	1
	F02E11.1	1
	F19B6.4	1
	T26A5.1	1
	Y42G9A.6	1
	Y47D3A.11	1
ABC-2 type transporter Total		8
ABC-type uncharacterised transport system	R31.3	1
ABC-type uncharacterised transport system Total		1
Abl-interactor, homeo-domain homologous region	B0336.6	1
Abl-interactor, homeo-domain homologous region Total		1
Abortive infection protein	F48F5.5	1
Abortive infection protein Total		1
Acetate--CoA ligase	C36A4.9	1
Acetate--CoA ligase Total		1
Acetoacetyl-CoA synthase	K03A1.5	1
Acetoacetyl-CoA synthase Total		1
Acetyl-CoA carboxylase, central region	W09B6.1	1
Acetyl-CoA carboxylase, central region Total		1
Acetyl-coenzyme A carboxyltransferase, C-terminal	F02A9.4	1
	F52E4.1	1
	T28F3.5	1
	W09B6.1	1
Acetyl-coenzyme A carboxyltransferase, C-terminal Total		4
Acetyl-coenzyme A carboxyltransferase, N-terminal	F02A9.4	1
	F52E4.1	1
	W09B6.1	1
Acetyl-coenzyme A carboxyltransferase, N-terminal Total		3
Acid ceramidase-like	F27E5.1	1
	K11D2.2	1
	Y55D5A.3	1
Acid ceramidase-like Total		3
Acid shock	W06H8.8	1
Acid shock Total		1
Acireductone dioxygenase, ARD	F42F12.4	1
	K07E1.1	1
	T01D1.4	1
Acireductone dioxygenase, ARD Total		3
Aconitase A/isopropylmalate dehydratase small subunit, swivel	F54H12.1	1
	ZK455.1	1
Aconitase A/isopropylmalate dehydratase small subunit, swivel Total		2
Aconitase family, 4Fe-4S cluster binding site	F54H12.1	1
	ZK455.1	1
Aconitase family, 4Fe-4S cluster binding site Total		2
Aconitase, mitochondrial-like	F54H12.1	1
Aconitase, mitochondrial-like Total		1
Aconitase/3-isopropylmalate dehydratase large subunit, alpha/beta/alpha	F54H12.1	1
	ZK455.1	1
Aconitase/3-isopropylmalate dehydratase large subunit, alpha/beta/alpha Total		2
Aconitase/iron regulatory protein 2	ZK455.1	1
Aconitase/iron regulatory protein 2 Total		1
Actin-binding FH2	C46H11.11	1
	F11H8.4	1
	F56E10.2	1
	F58B6.2	1
	Y48G9A.4	1
Actin-binding FH2 Total		5
Actin-binding FH2/DRF autoregulatory	C46H11.11	1
	F11H8.4	1
	F56E10.2	1
	F58B6.2	1
	Y48G9A.4	1
Actin-binding FH2/DRF autoregulatory Total		5
Actin-binding WH2	C07G1.4	1
	R06C1.3	1
	R144.4	1
Actin-binding WH2 Total		3
Actin-binding, cofilin/tropomyosin type	C38C3.5	1
	F38E9.5	1
	K08E3.4	1
	Y50D7A.10	1
Actin-binding, cofilin/tropomyosin type Total		4
Actin-related protein 2/3 complex, subunit 1	Y79H2A.6	1
Actin-related protein 2/3 complex, subunit 1 Total		1
Actin, conserved site	K07C5.1	1
	M03F4.2	1
	T04C12.4	1
	T04C12.5	1
	T04C12.6	1
	T25C8.2	1
	ZK616.4	1
Actin, conserved site Total		7
Actin/actin-like	C08B11.6	1
	C49H3.8	1
	K07C5.1	1
	M03F4.2	1
	T04C12.4	1
	T04C12.5	1
	T04C12.6	1
	T25C8.2	1
	Y53F4B.22	1
	Y71F9AL.16	1
	ZK616.4	1
Actin/actin-like Total		11
Actin/actin-like conserved site	K07C5.1	1
	M03F4.2	1
	T04C12.4	1
	T04C12.5	1
	T04C12.6	1
	T25C8.2	1
	Y71F9AL.16	1
Actin/actin-like conserved site Total		7
Actinin-type, actin-binding, conserved site	F15D3.1	1
	K11C4.3	1
	M116.5	1
	R31.1	1
	W04D2.1	1
	Y104H12BR.1	1
	ZC416.6	1
	ZK1151.1	1
	ZK973.6	1
Actinin-type, actin-binding, conserved site Total		9
Activator of Hsp90 ATPase homologue 1-like	C01G10.8	1
Activator of Hsp90 ATPase homologue 1-like Total		1
Activator of Hsp90 ATPase, N-terminal	C01G10.8	1
Activator of Hsp90 ATPase, N-terminal Total		1
Acute myeloid leukemia 1 (AML 1)/Runt	B0414.2	1
Acute myeloid leukemia 1 (AML 1)/Runt Total		1
Acyl carrier protein (ACP)	Y56A3A.19	1
Acyl carrier protein (ACP) Total		1
Acyl carrier protein-like	C41A3.1	1
	F16B4.6	1
	F32H2.5	1
	F36H1.6	1
	F37C12.3	1
	Y56A3A.19	1
	Y66D12A.14	1
Acyl carrier protein-like Total		7
Acyl transferase	C41A3.1	1
	C50D2.9	1
	F32H2.5	1
Acyl transferase Total		3
Acyl-CoA dehydrogenase, conserved site	C02B10.1	1
	C17C3.12	1
	C55B7.4	1
	E04F6.5	1
	F28A10.6	1
	F54D5.7	1
	K04D7.5	1
	K05F1.3	1
	K06A5.6	1
	T08G2.3	1
	T10E9.9	1
	T25G12.5	1
	Y76B12C.6	1
Acyl-CoA dehydrogenase, conserved site Total		13
Acyl-CoA dehydrogenase, N-terminal	C02B10.1	1
	C17C3.12	1
	C55B7.4	1
	E04F6.5	1
	F28A10.6	1
	F54D5.7	1
	K05F1.3	1
	K06A5.6	1
	K09H11.1	1
	T08G2.3	1
	T10E9.9	1
	T25G12.5	1
Acyl-CoA dehydrogenase, N-terminal Total		12
Acyl-CoA dehydrogenase, type 2, C-terminal	C02B10.1	1
	C17C3.12	1
	C55B7.4	1
	E04F6.5	1
	F28A10.6	1
	F54D5.7	1
	K05F1.3	1
	K06A5.6	1
	K09H11.1	1
	T08G2.3	1
	T10E9.9	1
	T25G12.5	1
Acyl-CoA dehydrogenase, type 2, C-terminal Total		12
Acyl-CoA oxidase	C48B4.1	1
	F08A8.1	1
	F08A8.2	1
	F08A8.3	1
	F08A8.4	1
	F25C8.1	1
	F58F9.7	1
	F59F4.1	1
Acyl-CoA oxidase Total		8
Acyl-CoA oxidase, C-terminal	C48B4.1	1
	F08A8.1	1
	F08A8.2	1
	F08A8.3	1
	F08A8.4	1
	F25C8.1	1
	F58F9.7	1
	F59F4.1	1
Acyl-CoA oxidase, C-terminal Total		8
Acyl-CoA oxidase/dehydrogenase, central domain	C02B10.1	1
	C17C3.12	1
	C48B4.1	1
	C55B7.4	1
	E04F6.5	1
	F08A8.1	1
	F08A8.2	1
	F08A8.3	1
	F08A8.4	1
	F25C8.1	1
	F28A10.6	1
	F54D5.7	1
	F58F9.7	1
	F59F4.1	1
	K05F1.3	1
	K06A5.6	1
	K09H11.1	1
	T08G2.3	1
	T10E9.9	1
	T25G12.5	1
Acyl-CoA oxidase/dehydrogenase, central domain Total		20
Acyl-CoA oxidase/dehydrogenase, type 1	C02B10.1	1
	C17C3.12	1
	C55B7.4	1
	E04F6.5	1
	F28A10.6	1
	F54D5.7	1
	K05F1.3	1
	K06A5.6	1
	K09H11.1	1
	T08G2.3	1
	T10E9.9	1
	T25G12.5	1
Acyl-CoA oxidase/dehydrogenase, type 1 Total		12
Acyl-CoA thioester hydrolase/bile acid-CoA amino acid N-acetyltransferase	C31H5.6	1
	K05B2.4	1
	T05E7.1	1
	W03D8.8	1
Acyl-CoA thioester hydrolase/bile acid-CoA amino acid N-acetyltransferase Total		4
Acyl-CoA thioesterase	C17C3.1	1
	C17C3.3	1
	C37H5.13	1
	F25E2.3	1
	Y87G2A.2	1
Acyl-CoA thioesterase Total		5
Acyl-CoA thioesterase, long chain	C31H5.6	1
	K05B2.4	1
	T05E7.1	1
	W03D8.8	1
Acyl-CoA thioesterase, long chain Total		4
Acyl-CoA-binding protein, ACBP	C18D11.2	1
	C44E4.6	1
	F47B10.7	1
	F56C9.5	1
	R06F6.9	1
	T12D8.3	1
	Y17G7B.1	1
	Y41E3.7	1
Acyl-CoA-binding protein, ACBP Total		8
Acyltransferase ChoActase/COT/CPT	B0395.3	1
	F41E7.6	1
	R07H5.2	1
	T20B3.1	1
	Y46G5A.17	1
	ZC416.8	1
Acyltransferase ChoActase/COT/CPT Total		6
ADAM-TS Spacer 1	C37C3.6	1
	F25H8.3	1
ADAM-TS Spacer 1 Total		2
ADAM, cysteine-rich	C04A11.4	1
	Y37D8A.13	1
ADAM, cysteine-rich Total		2
Adaptin ear-binding coat-associated protein 1 NECAP-1	Y110A2AR.3	1
Adaptin ear-binding coat-associated protein 1 NECAP-1 Total		1
Adaptor protein Cbl, EF hand-like	M02A10.3	1
Adaptor protein Cbl, EF hand-like Total		1
Adaptor protein Cbl, N-terminal helical	M02A10.3	1
Adaptor protein Cbl, N-terminal helical Total		1
Adaptor protein Cbl, SH2-like	M02A10.3	1
Adaptor protein Cbl, SH2-like Total		1
Adaptor protein ClpS, core	C32E8.11	1
Adaptor protein ClpS, core Total		1
Adaptor protein complex AP-1, gamma subunit	Y105E8A.9	1
Adaptor protein complex AP-1, gamma subunit Total		1
Adaptor protein complex AP-2, alpha subunit	T20B5.1	1
Adaptor protein complex AP-2, alpha subunit Total		1
Adaptor protein complex AP-3, beta subunit	R11A5.1	1
Adaptor protein complex AP-3, beta subunit Total		1
Adaptor protein complex AP-3, delta subunit	W09G10.4	1
Adaptor protein complex AP-3, delta subunit Total		1
Adaptor protein complex, beta subunit	Y71H2B.10	1
Adaptor protein complex, beta subunit Total		1
Adaptor protein complex, sigma subunit	F02E8.3	1
	F29G9.3	1
	Y48G8AL.14	1
Adaptor protein complex, sigma subunit Total		3
Adenine phosphoribosyl transferase	T19B4.3	1
Adenine phosphoribosyl transferase Total		1
Adenosine deaminase	C06G3.5	1
Adenosine deaminase Total		1
Adenosine deaminase/editase	T20H4.4	1
Adenosine deaminase/editase Total		1
Adenosine/AMP deaminase	C06G3.5	1
	C34F11.3	1
	C44B7.12	1
Adenosine/AMP deaminase Total		3
Adenosine/AMP deaminase active site	C34F11.3	1
Adenosine/AMP deaminase active site Total		1
Adenosylcobalamin biosynthesis, ATP:cob(I)alamin adenosyltransferase, EutT/PduO type	C26E6.11	1
Adenosylcobalamin biosynthesis, ATP:cob(I)alamin adenosyltransferase, EutT/PduO type Total		1
Adenosylcobalamin biosynthesis, ATP:cob(I)alamin adenosyltransferase, PduO-type, N-terminal	C26E6.11	1
Adenosylcobalamin biosynthesis, ATP:cob(I)alamin adenosyltransferase, PduO-type, N-terminal Total		1
Adenylate cyclase-associated CAP, C-terminal	C18E3.6	1
	F41G4.2	1
Adenylate cyclase-associated CAP, C-terminal Total		2
Adenylate cyclase-associated CAP, N-terminal	C18E3.6	1
	F41G4.2	1
Adenylate cyclase-associated CAP, N-terminal Total		2
Adenylate kinase	C29E4.8	1
	C29F7.3	1
	F13E6.2	1
	F38B2.4	1
	F40F8.1	1
	ZK673.2	1
Adenylate kinase Total		6
Adenylate kinase, active site lid domain	C29E4.8	1
	ZK673.2	1
Adenylate kinase, active site lid domain Total		2
Adenylate kinase, isozyme 1	F38B2.4	1
Adenylate kinase, isozyme 1 Total		1
Adenylate kinase, subfamily	C29E4.8	1
Adenylate kinase, subfamily Total		1
Adenylosuccinate lyase	R06C7.5	1
Adenylosuccinate lyase Total		1
Adenylosuccinate synthase, active site	C37H5.6	1
Adenylosuccinate synthase, active site Total		1
Adenylosuccinate synthetase	C37H5.6	1
Adenylosuccinate synthetase Total		1
Adenylyl cyclase class-3/4/guanylyl cyclase	C06B3.8	1
	C10F3.3	1
	C44F1.5	1
	C46E1.2	1
	C54E4.3	1
	F08B1.2	1
	F17C8.1	1
	F57F5.2	1
	M04G12.3	1
	T01A4.1	1
	T01C2.1	1
	T04D3.4	1
	T07D1.1	1
Adenylyl cyclase class-3/4/guanylyl cyclase Total		13
Adenylyl cyclase class-3/4/guanylyl cyclase, conserved site	C06B3.8	1
	C10F3.3	1
	C46E1.2	1
	C54E4.3	1
	F08B1.2	1
	F57F5.2	1
	M04G12.3	1
	T01A4.1	1
	T01C2.1	1
	T04D3.4	1
	T07D1.1	1
Adenylyl cyclase class-3/4/guanylyl cyclase, conserved site Total		11
Adenylylsulphate kinase, C-terminal	T14G10.1	1
Adenylylsulphate kinase, C-terminal Total		1
Adipose-regulatory protein, Seipin	R01B10.6	1
Adipose-regulatory protein, Seipin Total		1
AdoMet-dependent methyltransferase, predicted	C23G10.7	1
AdoMet-dependent methyltransferase, predicted Total		1
ADP-ribosylation factor	B0336.2	1
	C33D12.6	1
	C38D4.8	1
	C39F7.4	1
	C56E6.2	1
	D1037.4	1
	F19H8.3	1
	F22B5.1	1
	F45E4.1	1
	F54C9.10	1
	F57H12.1	1
	T23H2.5	1
	W01H2.3	1
	W04G5.2	1
	Y116A8C.12	1
	Y37E3.5	1
	Y45F3A.2	1
	Y54E10BR.2	1
	Y57G11C.13	1
	Y92C3B.3	1
	ZK1320.6	1
	ZK180.4	1
	ZK632.8	1
ADP-ribosylation factor Total		23
ADP-specific phosphofructokinase/glucokinase	C50D2.7	1
ADP-specific phosphofructokinase/glucokinase Total		1
Adrenodoxin, iron-sulphur binding site	Y73F8A.27	1
Adrenodoxin, iron-sulphur binding site Total		1
AGC-kinase, C-terminal	B0545.1	1
	C09G4.2	1
	C10H11.9	1
	C12D8.10	1
	C54G4.1	1
	E01H11.1	1
	F09E5.1	1
	F19C6.1	1
	F28H6.1	1
	F46F6.2	1
	F47F2.1	1
	F55A8.2	1
	F57F5.5	1
	K08B12.5	1
	R11G1.4	1
	T01H8.1	1
	T20F10.1	1
	W02B3.2	1
	W10G6.2	1
	Y47D3A.16	1
	ZK909.2	1
AGC-kinase, C-terminal Total		21
AICARFT/IMPCHase bienzyme	C55F2.1	1
AICARFT/IMPCHase bienzyme Total		1
AICARFT/IMPCHase bienzyme, transformylase domain	C55F2.1	1
AICARFT/IMPCHase bienzyme, transformylase domain Total		1
AIG2-like	F42A10.9	1
AIG2-like Total		1
AIR synthase related protein	F10F2.2	1
	F38B6.4	1
	Y45F10A.4	1
AIR synthase related protein Total		3
AIR synthase related protein, C-terminal	F10F2.2	1
	F38B6.4	1
	Y45F10A.4	1
AIR synthase related protein, C-terminal Total		3
Alanine dehydrogenase/PNT, C-terminal	C15H9.1	1
	R02D3.1	1
Alanine dehydrogenase/PNT, C-terminal Total		2
Alanine dehydrogenase/PNT, N-terminal	C15H9.1	1
	R02D3.1	1
Alanine dehydrogenase/PNT, N-terminal Total		2
Alanine racemase, N-terminal	F09E5.8	1
Alanine racemase, N-terminal Total		1
Alanyl-tRNA synthetase, class IIc	F28H1.3	1
	W02B12.6	1
Alanyl-tRNA synthetase, class IIc Total		2
Alanyl-tRNA synthetase, class IIc, core domain	F28H1.3	1
	W02B12.6	1
Alanyl-tRNA synthetase, class IIc, core domain Total		2
Alanyl-tRNA synthetase, class IIc, N-terminal	F28H1.3	1
	W02B12.6	1
Alanyl-tRNA synthetase, class IIc, N-terminal Total		2
Alba, DNA/RNA-binding protein	Y62E10A.2	1
Alba, DNA/RNA-binding protein Total		1
Alcohol dehydrogenase class III/S-(hydroxymethyl)glutathione dehydrogenase	H24K24.3	1
Alcohol dehydrogenase class III/S-(hydroxymethyl)glutathione dehydrogenase Total		1
Alcohol dehydrogenase GroES-like	F39B2.3	1
	F56H1.6	1
	H24K24.3	1
	R04B5.5	1
	R04B5.6	1
	W09H1.5	1
	Y48A6B.9	1
	Y50D4C.2	1
Alcohol dehydrogenase GroES-like Total		8
Alcohol dehydrogenase, iron-type	Y38F1A.6	1
Alcohol dehydrogenase, iron-type Total		1
Alcohol dehydrogenase, iron-type, conserved site	Y38F1A.6	1
Alcohol dehydrogenase, iron-type, conserved site Total		1
Alcohol dehydrogenase, zinc-binding	F32H2.5	1
	F39B2.3	1
	F56H1.6	1
	H24K24.3	1
	M106.3	1
	R04B5.5	1
	R04B5.6	1
	W09H1.5	1
	Y48A6B.9	1
	Y50D4C.2	1
Alcohol dehydrogenase, zinc-binding Total		10
Alcohol dehydrogenase, zinc-containing, conserved site	H24K24.3	1
	R04B5.5	1
	R04B5.6	1
	Y50D4C.2	1
Alcohol dehydrogenase, zinc-containing, conserved site Total		4
Aldehyde dehydrogenase	C54D1.4	1
	F01F1.6	1
	F13D12.4	1
	F36H1.6	1
	F42G9.5	1
	F45H10.1	1
	F54D8.3	1
	F56D12.1	1
	K04F1.15	1
	T05H4.13	1
	T08B1.3	1
	Y69F12A.2	1
Aldehyde dehydrogenase Total		12
Aldehyde dehydrogenase NAD(P)-dependent	T05H4.13	1
	T08B1.3	1
Aldehyde dehydrogenase NAD(P)-dependent Total		2
Aldehyde dehydrogenase, conserved site	C24A3.4	1
	C54D1.4	1
	F01F1.6	1
	F13D12.4	1
	F36H1.6	1
	F42G9.5	1
	F45H10.1	1
	F54D8.3	1
	F56D12.1	1
	K04F1.15	1
	T06D8.6	1
	Y54G11A.3	1
	Y69A2AR.16	1
	Y69F12A.2	1
Aldehyde dehydrogenase, conserved site Total		14
Aldehyde oxidase/xanthine dehydrogenase	F15E6.6	1
	F55B11.1	1
Aldehyde oxidase/xanthine dehydrogenase Total		2
Aldehyde oxidase/xanthine dehydrogenase, a/b hammerhead	B0222.9	1
	F15E6.6	1
	F55B11.1	1
Aldehyde oxidase/xanthine dehydrogenase, a/b hammerhead Total		3
Aldehyde oxidase/xanthine dehydrogenase, molybdopterin binding	B0222.9	1
	F15E6.6	1
	F55B11.1	1
Aldehyde oxidase/xanthine dehydrogenase, molybdopterin binding Total		3
Aldo/keto reductase	C01G5.5	1
	C07D8.5	1
	C07D8.6	1
	C35D10.6	1
	F53F1.2	1
	T08H10.1	1
	Y39G8B.1	1
	ZC443.1	1
	ZK1290.5	1
Aldo/keto reductase Total		9
Aldo/keto reductase, conserved site	C01G5.5	1
	C07D8.6	1
	F53F1.2	1
	M01D7.2	1
	T08H10.1	1
	Y116A8C.13	1
	Y39G8B.1	1
	ZC443.1	1
	ZK1290.5	1
Aldo/keto reductase, conserved site Total		9
Aldose 1-epimerase	C01B4.6	1
	Y19D10A.16	1
Aldose 1-epimerase Total		2
Alg9-like mannosyltransferase	C14A4.3	1
	T27F7.3	1
	ZC513.5	1
Alg9-like mannosyltransferase Total		3
Alkyl hydroperoxide reductase/ Thiol specific antioxidant/ Mal allergen	C32D5.8	1
	F09E5.15	1
	F26E4.12	1
	K02H11.6	1
	R05H5.3	1
	R07E5.2	1
	T20D4.7	1
	Y38C1AA.11	1
	Y52E8A.3	1
Alkyl hydroperoxide reductase/ Thiol specific antioxidant/ Mal allergen Total		9
Allergen V5/Tpx-1 related	B0545.3	1
	C07A4.3	1
	C39E9.2	1
	C39E9.4	1
	C39E9.5	1
	C39E9.6	1
	F02E11.5	1
	F09B9.5	1
	F09E8.5	1
	F11C7.3	1
	F48E8.1	1
	F49E11.10	1
	F49E11.11	1
	F49E11.4	1
	F49E11.5	1
	F49E11.6	1
	F49E11.9	1
	F57B7.2	1
	H10D18.2	1
	H10D18.4	1
	T05A10.5	1
	T12A7.3	1
	Y43F8B.5	1
	Y51H7C.2	1
	ZK384.1	1
	ZK384.2	1
Allergen V5/Tpx-1 related Total		26
Allergen V5/Tpx-1 related, conserved site	C07A4.3	1
	F11C7.3	1
	F48E8.1	1
	F49E11.11	1
	T05A10.5	1
Allergen V5/Tpx-1 related, conserved site Total		5
Alpha defensin	C04G6.10	1
	C04G6.7	1
	C27A2.5	1
	T01B7.8	1
Alpha defensin Total		4
Alpha-(1,6)-fucosyltransferase, eukaryotic type	C10F3.6	1
Alpha-(1,6)-fucosyltransferase, eukaryotic type Total		1
Alpha-1, 2 glucosyltransferase Alg10	T24D1.4	1
Alpha-1, 2 glucosyltransferase Alg10 Total		1
Alpha-2-macroglobulin RAP, C-terminal	C15C8.4	1
Alpha-2-macroglobulin RAP, C-terminal Total		1
Alpha-2-macroglobulin, conserved site	ZK337.1	1
Alpha-2-macroglobulin, conserved site Total		1
Alpha-2-macroglobulin, N-terminal	ZK337.1	1
Alpha-2-macroglobulin, N-terminal Total		1
Alpha-2-macroglobulin, N-terminal 2	ZK337.1	1
Alpha-2-macroglobulin, N-terminal 2 Total		1
Alpha-2-macroglobulin, thiol-ester bond-forming	ZK337.1	1
Alpha-2-macroglobulin, thiol-ester bond-forming Total		1
Alpha-amylase, C-terminal all beta	C50B6.7	1
	T04A8.7	1
Alpha-amylase, C-terminal all beta Total		2
Alpha-D-phosphohexomutase, alpha/beta/alpha domain I	F21D5.1	1
	R05F9.6	1
	Y43F4B.5	1
Alpha-D-phosphohexomutase, alpha/beta/alpha domain I Total		3
Alpha-D-phosphohexomutase, alpha/beta/alpha domain II	F21D5.1	1
	R05F9.6	1
	Y43F4B.5	1
Alpha-D-phosphohexomutase, alpha/beta/alpha domain II Total		3
Alpha-D-phosphohexomutase, alpha/beta/alpha domain III	R05F9.6	1
Alpha-D-phosphohexomutase, alpha/beta/alpha domain III Total		1
Alpha-D-phosphohexomutase, C-terminal	F21D5.1	1
	R05F9.6	1
Alpha-D-phosphohexomutase, C-terminal Total		2
Alpha-D-phosphohexomutase, conserved site	F21D5.1	1
	R05F9.6	1
	Y43F4B.5	1
Alpha-D-phosphohexomutase, conserved site Total		3
Alpha-hydroxy acid dehydrogenase, FMN-dependent	F41E6.5	1
Alpha-hydroxy acid dehydrogenase, FMN-dependent Total		1
Alpha-isopropylmalate/homocitrate synthase, conserved site	K08H10.4	1
	ZK1290.12	1
Alpha-isopropylmalate/homocitrate synthase, conserved site Total		2
Alpha-macroglobulin, receptor-binding	ZK337.1	1
Alpha-macroglobulin, receptor-binding Total		1
Alpha-N-acetylglucosaminidase	K09E4.4	1
Alpha-N-acetylglucosaminidase Total		1
Alpha/beta hydrolase fold-1	B0464.9	1
	C25A1.12	1
	C37H5.2	1
	C37H5.3	1
	C45B11.6	1
	F01G10.7	1
	F32B4.6	1
	F37A4.1	1
	F46B6.8	1
	F54F3.3	1
	K01A2.5	1
	K02F3.6	1
	K04A8.5	1
	K07C5.5	1
	R05D7.4	1
	R11G11.14	1
	W01A11.1	1
	Y55F3AM.10	1
	Y57E12B.3	1
	Y60A3A.7	1
	Y97E10AL.2	1
	ZK6.7	1
Alpha/beta hydrolase fold-1 Total		22
Amidase	B0218.1	1
	B0218.2	1
	F58H7.2	1
	Y41D4A.6	1
	Y53F4B.18	1
Amidase Total		5
Amidase, conserved site	B0218.1	1
	B0218.2	1
	F58H7.2	1
	Y53F4B.18	1
Amidase, conserved site Total		4
Amidase, fungi	B0218.1	1
	B0218.2	1
	F58H7.2	1
Amidase, fungi Total		3
Amidohydrolase 1	C47E12.8	1
	D2085.1	1
	F38E11.3	1
	F59B2.3	1
	R06C7.3	1
	T12A2.1	1
Amidohydrolase 1 Total		6
Amidohydrolase 2	Y71D11A.3	1
Amidohydrolase 2 Total		1
Amidohydrolase 3	F59B2.3	1
	T12A2.1	1
Amidohydrolase 3 Total		2
Amidophosphoribosyl transferase	T04A8.5	1
Amidophosphoribosyl transferase Total		1
Amine oxidase	C24G6.6	1
	F25C8.2	1
	F37C4.6	1
	F55C5.6	1
	R13G10.2	1
	T08D10.2	1
	Y40B1B.6	1
Amine oxidase Total		7
Amino acid permease domain	B0303.11	1
	B0454.6	1
	C50D2.2	1
	F07C3.7	1
	F10E7.9	1
	F23F1.6	1
	F27C8.1	1
	F52H2.2	1
	H16O14.1	1
	K02A2.3	1
	R13A1.2	1
	T04B8.5	1
	Y37A1C.1	1
Amino acid permease domain Total		13
Amino acid transporter, transmembrane	C03A3.2	1
	F13H10.3	1
	T20G5.6	1
	T27A1.5	1
	Y43F4B.7	1
	Y51F10.4	1
Amino acid transporter, transmembrane Total		6
Amino acid-binding ACT	K01C8.1	1
	K08F8.4	1
	Y51H7C.9	1
Amino acid-binding ACT Total		3
Amino acid/polyamine transporter I	B0454.6	1
	C50D2.2	1
	F07C3.7	1
	F23F1.6	1
	F27C8.1	1
	F52H2.2	1
Amino acid/polyamine transporter I Total		6
Aminoacyl-tRNA synthetase, class I (M)	C25A1.7	1
	F58B3.5	1
	R11A8.6	1
	R74.1	1
	Y105E8A.20	1
	Y87G2A.5	1
	ZK524.3	1
Aminoacyl-tRNA synthetase, class I (M) Total		7
Aminoacyl-tRNA synthetase, class I, conserved site	C18C4.3	1
	C29H12.1	1
	C34E10.4	1
	F11C7.4	1
	F26F4.10	1
	F36H1.2	1
	F58B3.5	1
	K08F11.4	1
	R11A8.6	1
	R74.1	1
	T07A9.2	1
	T18D3.7	1
	Y41E3.4	1
	Y43F8C.6	1
	Y87G2A.5	1
	ZC434.5	1
	ZC434.9	1
	ZK384.3	1
	ZK524.3	1
	ZK617.1	1
Aminoacyl-tRNA synthetase, class I, conserved site Total		20
Aminoacyl-tRNA synthetase, class Ia	C25A1.7	1
	R11A8.6	1
	R74.1	1
	Y105E8A.20	1
	Y87G2A.5	1
	ZK524.3	1
Aminoacyl-tRNA synthetase, class Ia Total		6
Aminoacyl-tRNA synthetase, class Ib	C34E10.4	1
	K08F11.4	1
	Y105E8A.19	1
	Y80D3A.1	1
Aminoacyl-tRNA synthetase, class Ib Total		4
Aminoacyl-tRNA synthetase, class II (D/K/N)	B0464.1	1
	F10C2.6	1
	F22D6.3	1
	T02G5.9	1
	Y66D12A.23	1
Aminoacyl-tRNA synthetase, class II (D/K/N) Total		5
Aminoacyl-tRNA synthetase, class II (G/ H/ P/ S), conserved domain	C47D12.6	1
	C47E12.1	1
	T10F2.1	1
	T11G6.1	1
	T20H4.3	1
	T27F6.5	1
	W03B1.4	1
Aminoacyl-tRNA synthetase, class II (G/ H/ P/ S), conserved domain Total		7
Aminoacyl-tRNA synthetase, class II, conserved domain	B0464.1	1
	C47D12.6	1
	C47E12.1	1
	F10C2.6	1
	F22D6.3	1
	T02G5.9	1
	T08B2.9	1
	T10F2.1	1
	T11G6.1	1
	T20H4.3	1
	T27F6.5	1
	W03B1.4	1
	Y60A3A.13	1
	Y66D12A.23	1
Aminoacyl-tRNA synthetase, class II, conserved domain Total		14
Aminoglycoside phosphotransferase	B0285.10	1
	B0285.8	1
	B0285.9	1
	C10C6.1	1
	C28D4.2	1
	C52B9.1	1
	F22F7.5	1
	K09H11.1	1
	T27A10.3	1
	Y105E8B.3	1
Aminoglycoside phosphotransferase Total		10
Aminotransferase class-III	C16A3.10	1
	K04D7.3	1
	T01B11.2	1
	T09B4.8	1
	T25B9.1	1
Aminotransferase class-III Total		5
Aminotransferase class-V pyridoxal-phosphate binding site	B0205.6	1
	D2085.5	1
	F26H9.5	1
	T14D7.1	1
Aminotransferase class-V pyridoxal-phosphate binding site Total		4
Aminotransferase, class I/II	C14E2.2	1
	C14F11.1	1
	C23H3.4	1
	C32F10.8	1
	C44E4.3	1
	F28H6.3	1
	F42D1.2	1
	F43H9.2	1
	R03A10.4	1
	T01C8.4	1
	T01C8.5	1
	T04F3.1	1
	T22G5.5	1
	T25B9.1	1
Aminotransferase, class I/II Total		14
Aminotransferase, class IV	K02A4.1	1
	Y44A6D.5	1
Aminotransferase, class IV Total		2
Aminotransferase, class IV, conserved site	K02A4.1	1
	Y44A6D.5	1
Aminotransferase, class IV, conserved site Total		2
Aminotransferase, class V/Cysteine desulfurase	B0205.6	1
	B0222.4	1
	F13H8.9	1
	F26H9.5	1
	R03A10.3	1
	T14D7.1	1
	Y104H12D.3	1
	Y66H1B.4	1
Aminotransferase, class V/Cysteine desulfurase Total		8
Aminotransferase, class-II, pyridoxal-phosphate binding site	F29D11.1	1
	F43H9.2	1
	T22G5.5	1
	ZK337.1	1
Aminotransferase, class-II, pyridoxal-phosphate binding site Total		4
Aminotransferases, class-I, pyridoxal-phosphate-binding site	C14F11.1	1
	C44E4.3	1
	R05H10.2	1
	T01C8.4	1
	T01C8.5	1
Aminotransferases, class-I, pyridoxal-phosphate-binding site Total		5
AMMECR1	R166.3	1
AMMECR1 Total		1
Ammonium transporter	B0240.1	1
	F08F3.3	1
Ammonium transporter Total		2
AMOP	F54D1.6	1
	K03H1.5	1
	R09E10.5	1
AMOP Total		3
AMP deaminase	C34F11.3	1
AMP deaminase Total		1
AMP deaminase, metazoa	C34F11.3	1
AMP deaminase, metazoa Total		1
AMP-binding, conserved site	C01G6.7	1
	C36A4.9	1
	C46F4.2	1
	C50H11.1	1
	D1009.1	1
	F11A3.1	1
	F28D1.9	1
	F28F8.2	1
	F37C12.7	1
	F41C3.3	1
	F46E10.1	1
	K03A1.5	1
	R07C3.4	1
	R09E10.3	1
	Y65B4BL.5	1
	Y66D12A.14	1
	Y76A2B.3	1
AMP-binding, conserved site Total		17
AMP-dependent synthetase/ligase	C01G6.7	1
	C36A4.9	1
	C41A3.1	1
	C46F4.2	1
	C50H11.1	1
	D1009.1	1
	F11A3.1	1
	F25C8.4	1
	F28B3.1	1
	F28D1.9	1
	F28F8.2	1
	F37C12.7	1
	F41C3.3	1
	F46E10.1	1
	K03A1.5	1
	R07C3.4	1
	R09E10.3	1
	W09D6.1	1
	Y65B4BL.5	1
	Y66D12A.14	1
	Y76A2B.3	1
AMP-dependent synthetase/ligase Total		21
Amylo-alpha-1,6-glucosidase	R06A4.8	1
Amylo-alpha-1,6-glucosidase Total		1
Amyloidogenic glycoprotein, extracellular	C42D8.8	1
Amyloidogenic glycoprotein, extracellular Total		1
Amyloidogenic glycoprotein, extracellular domain conserved site	C42D8.8	1
Amyloidogenic glycoprotein, extracellular domain conserved site Total		1
Anaphase-promoting complex, subunit 10	C01B7.6	1
	F15H10.3	1
	Y48G1C.12	1
Anaphase-promoting complex, subunit 10 Total		3
Anaphylatoxin/fibulin	F56H11.1	1
Anaphylatoxin/fibulin Total		1
Ankyrin repeat	B0212.5	1
	B0350.2	1
	C01F1.6	1
	C01H6.2	1
	C04F12.3	1
	C06C3.1	1
	C09F9.3	1
	C11E4.6	1
	C18F10.7	1
	C24A1.3	1
	C27A7.5	1
	C29E6.2	1
	C29F9.7	1
	C33A11.1	1
	C33B4.3	1
	C34D4.14	1
	C43H6.3	1
	C45B2.6	1
	C46H3.3	1
	D1037.5	1
	D2021.2	1
	DH11.1	1
	F02A9.6	1
	F14F3.2	1
	F22G12.4	1
	F26F4.12	1
	F28H7.10	1
	F30F8.2	1
	F35D6.1	1
	F36H1.2	1
	F42H11.2	1
	F46F3.4	1
	F47A4.5	1
	H32C10.3	1
	K02A11.1	1
	K02B12.5	1
	K04C2.4	1
	K12C11.4	1
	M60.7	1
	R06B10.4	1
	R107.8	1
	R11A8.7	1
	R31.2	1
	T05C1.4	1
	T09A12.3	1
	T10B10.7	1
	T12D8.3	1
	T22D2.1	1
	T27C10.6	1
	T28D6.4	1
	W07A8.2	1
	Y106G6H.14	1
	Y17G7B.15	1
	Y32G9A.6	1
	Y39A1A.15	1
	Y39C12A.1	1
	Y40C5A.2	1
	Y47D3A.22	1
	Y48G1A.3	1
	Y55F3BR.8	1
	Y71A12B.4	1
	ZC15.7	1
	ZC21.2	1
	ZK1320.7	1
	ZK265.1	1
	ZK792.4	1
Ankyrin repeat Total		66
Ankyrin repeat-containing domain	B0212.5	1
	B0350.2	1
	C01F1.6	1
	C01H6.2	1
	C04F12.3	1
	C06C3.1	1
	C09F9.3	1
	C11E4.6	1
	C18F10.7	1
	C24A1.3	1
	C27A7.5	1
	C29E6.2	1
	C29F9.7	1
	C33A11.1	1
	C33B4.3	1
	C34D4.14	1
	C43H6.3	1
	C45B2.6	1
	C46H3.3	1
	D1037.5	1
	D2021.2	1
	DH11.1	1
	F02A9.6	1
	F14F3.2	1
	F22G12.4	1
	F26F4.12	1
	F28H7.10	1
	F30F8.2	1
	F35D6.1	1
	F36H1.2	1
	F42H11.2	1
	F46F3.4	1
	F47A4.5	1
	H23L24.2	1
	H32C10.3	1
	K02A11.1	1
	K02B12.5	1
	K04C2.4	1
	K12C11.4	1
	M60.7	1
	R107.8	1
	R11A8.7	1
	R31.2	1
	T05C1.4	1
	T09A12.3	1
	T10B10.7	1
	T12D8.3	1
	T22D2.1	1
	T27C10.6	1
	T28D6.4	1
	W07A8.2	1
	Y106G6H.14	1
	Y17G7B.15	1
	Y32G9A.6	1
	Y39A1A.15	1
	Y39C12A.1	1
	Y40C5A.2	1
	Y47D3A.22	1
	Y48G1A.3	1
	Y55F3BR.8	1
	Y71A12B.4	1
	ZC15.7	1
	ZC21.2	1
	ZK1320.7	1
	ZK265.1	1
	ZK792.4	1
Ankyrin repeat-containing domain Total		66
Annexin repeat	C28A5.3	1
	C37H5.1	1
	T07C4.9	1
	ZC155.1	1
Annexin repeat Total		4
Annexin repeat, conserved site	C28A5.3	1
	T07C4.9	1
	ZC155.1	1
Annexin repeat, conserved site Total		3
ANTH	C32E8.10	1
	F08A8.6	1
	Y18D10A.22	1
	ZK370.3	1
ANTH Total		4
Anti-proliferative protein	C03C11.2	1
	T09B4.6	1
Anti-proliferative protein Total		2
Anticodon-binding	C47D12.6	1
	T10F2.1	1
	T11G6.1	1
	T20H4.3	1
	T27F6.5	1
Anticodon-binding Total		5
Antigen peptide transporter 2	F43E2.4	1
	W04C9.1	1
	ZK484.2	1
Antigen peptide transporter 2 Total		3
AP endonuclease, family 1	R09B3.1	1
AP endonuclease, family 1 Total		1
AP endonuclease, family 2, zinc binding site	H19N07.4	1
AP endonuclease, family 2, zinc binding site Total		1
ApaG	ZK652.10	1
ApaG Total		1
Aph-1	VF36H2L.1	1
Aph-1 Total		1
APOBEC/CMP deaminase, zinc-binding	C47D2.2	1
	F49E8.4	1
	JC8.4	1
	ZK643.2	1
APOBEC/CMP deaminase, zinc-binding Total		4
Apoptosis regulator, Bcl-2 protein, BAG	F57B10.11	1
	H14N18.1	1
	ZK973.6	1
Apoptosis regulator, Bcl-2 protein, BAG Total		3
Apple-like	C29E6.1	1
	H42K12.3	1
	T06D8.1	1
Apple-like Total		3
Appr-1-p processing	B0035.3	1
Appr-1-p processing Total		1
Apyrase	F08C6.6	1
	ZK563.7	1
Apyrase Total		2
Aquaporin	C01G6.1	1
	M02F4.8	1
Aquaporin Total		2
Aquaporin, 11/12	K07A1.16	1
	ZK1321.3	1
Aquaporin, 11/12 Total		2
Arb2 domain	Y75B8A.31	1
Arb2 domain Total		1
Archease, tRNA m5C methyltransferase chaperone	C43H8.1	1
Archease, tRNA m5C methyltransferase chaperone Total		1
Arf GTPase activating protein	F07F6.4	1
	F14F3.2	1
	K02B12.7	1
	W09D10.1	1
	Y17G7B.15	1
	Y39A1A.15	1
Arf GTPase activating protein Total		6
ARF/SAR superfamily	B0336.2	1
	C38D4.8	1
	F19H8.3	1
	F22B5.1	1
	F45E4.1	1
	F54C9.10	1
	F57H12.1	1
	Y116A8C.12	1
	Y37E3.5	1
	Y54E10BR.2	1
	Y57G11C.13	1
	ZK1320.6	1
	ZK180.4	1
	ZK632.8	1
ARF/SAR superfamily Total		14
Arfaptin-like	C32E8.7	1
	F54C8.7	1
	Y57G11C.22	1
Arfaptin-like Total		3
ArgE/DapE/ACY1/CPG2/YscS, conserved site	C06A6.4	1
	C10C5.3	1
	C10C5.4	1
	C10C5.5	1
	R11H6.1	1
	Y71H2AM.11	1
ArgE/DapE/ACY1/CPG2/YscS, conserved site Total		6
Arginine-tRNA-protein transferase 1, eukaryotic	K07A1.9	1
Arginine-tRNA-protein transferase 1, eukaryotic Total		1
Arginine-tRNA-protein transferase, C-terminal	K07A1.9	1
Arginine-tRNA-protein transferase, C-terminal Total		1
Arginine-tRNA-protein transferase, N-terminal	K07A1.9	1
Arginine-tRNA-protein transferase, N-terminal Total		1
Arginyl tRNA synthetase, class Ic, N-terminal	F26F4.10	1
Arginyl tRNA synthetase, class Ic, N-terminal Total		1
Arginyl-tRNA synthetase, class Ic	F26F4.10	1
Arginyl-tRNA synthetase, class Ic Total		1
Arginyl-tRNA synthetase, class Ic, core	C29H12.1	1
	F26F4.10	1
Arginyl-tRNA synthetase, class Ic, core Total		2
ArgK protein	T02G5.13	1
ArgK protein Total		1
Argonaute/Dicer protein, PAZ	C01G5.2	1
	D2030.6	1
	F48F7.1	1
	K12H4.8	1
	T07D3.7	1
Argonaute/Dicer protein, PAZ Total		5
ARID/BRIGHT DNA-binding domain	C01G8.9	1
	C08B11.3	1
	T23D8.8	1
	Y108G3AL.7	1
	ZK593.4	1
ARID/BRIGHT DNA-binding domain Total		5
Armadillo	C54D1.6	1
	D1044.8	1
	F08F8.3	1
	F26B1.3	1
	F32E10.4	1
	F53B2.5	1
	K05C4.6	1
	M01E11.2	1
	Y105C5B.21	1
	Y106G6G.6	1
Armadillo Total		10
Armet protein	Y54G2A.23	1
Armet protein Total		1
Aromatic amino acid beta-eliminating lyase/threonine aldolase	B0205.6	1
	R102.4	1
Aromatic amino acid beta-eliminating lyase/threonine aldolase Total		2
Aromatic amino acid hydroxylase, C-terminal	B0432.5	1
	K08F8.4	1
	ZK1290.2	1
Aromatic amino acid hydroxylase, C-terminal Total		3
Aromatic amino acid hydroxylase, iron/copper binding site	B0432.5	1
	K08F8.4	1
	ZK1290.2	1
Aromatic amino acid hydroxylase, iron/copper binding site Total		3
ARP2/3 complex 16kDa subunit (p16-Arc)	C46H11.3	1
	M01B12.3	1
ARP2/3 complex 16kDa subunit (p16-Arc) Total		2
Arp2/3 complex, 34kDa subunit p34-Arc	Y6D11A.2	1
Arp2/3 complex, 34kDa subunit p34-Arc Total		1
ARP2/3 complex, p21-Arc subunit	Y37D8A.1	1
ARP2/3 complex, p21-Arc subunit Total		1
ARP23 complex 20kDa subunit	C35D10.16	1
ARP23 complex 20kDa subunit Total		1
Arrestin-like, C-terminal	C04E12.12	1
	F35F10.11	1
	F35F10.12	1
	F40F8.8	1
	F48F7.7	1
	F53H8.2	1
	R06B9.1	1
	R06B9.3	1
	R06B9.4	1
	T12D8.4	1
	T20D4.6	1
	Y17G7B.11	1
	Y17G7B.14	1
	Y49E10.24	1
	ZK938.4	1
Arrestin-like, C-terminal Total		15
Arrestin-like, N-terminal	C04E12.11	1
	C04E12.12	1
	F35F10.11	1
	F35F10.12	1
	F40F8.8	1
	F48F7.7	1
	F53H8.2	1
	R06B9.1	1
	R06B9.2	1
	R06B9.3	1
	R06B9.4	1
	T12D8.4	1
	T20D4.6	1
	Y17G7B.11	1
	Y17G7B.14	1
	Y49E10.24	1
	ZK938.4	1
Arrestin-like, N-terminal Total		17
Arrestin, conserved site	F53H8.2	1
Arrestin, conserved site Total		1
Arv1-like protein	R05H5.5	1
Arv1-like protein Total		1
Arylacetamide deacetylase	F16F9.4	1
	F27C8.6	1
	T09B9.1	1
	Y43F8A.3	1
Arylacetamide deacetylase Total		4
Arylesterase	E01A2.10	1
	E01A2.7	1
	K05F6.11	1
	W02D3.3	1
Arylesterase Total		4
Asparaginase/glutaminase	C27A7.5	1
Asparaginase/glutaminase Total		1
Asparaginase/glutaminase, conserved site	C27A7.5	1
Asparaginase/glutaminase, conserved site Total		1
Asparagine synthase	F25G6.6	1
	M02D8.4	1
	M106.4	1
	M18.3	1
Asparagine synthase Total		4
Asparagine synthase, glutamine-hydrolyzing	F25G6.6	1
	M02D8.4	1
Asparagine synthase, glutamine-hydrolyzing Total		2
Asparaginyl-tRNA synthetase, class IIb	F22D6.3	1
Asparaginyl-tRNA synthetase, class IIb Total		1
Aspartate carbamoyltransferase, eukaryotic	D2085.1	1
Aspartate carbamoyltransferase, eukaryotic Total		1
Aspartate/glutamate/uridylate kinase	T22H6.2	1
Aspartate/glutamate/uridylate kinase Total		1
Aspartate/ornithine carbamoyltransferase	D2085.1	1
Aspartate/ornithine carbamoyltransferase Total		1
Aspartate/ornithine carbamoyltransferase, Asp/Orn-binding domain	D2085.1	1
Aspartate/ornithine carbamoyltransferase, Asp/Orn-binding domain Total		1
Aspartate/ornithine carbamoyltransferase, carbamoyl-P binding	D2085.1	1
Aspartate/ornithine carbamoyltransferase, carbamoyl-P binding Total		1
Aspartyl-tRNA synthetase, class IIb, archea/euk type	B0464.1	1
Aspartyl-tRNA synthetase, class IIb, archea/euk type Total		1
Aspartyl/Asparaginyl beta-hydroxylase	K09A9.6	1
Aspartyl/Asparaginyl beta-hydroxylase Total		1
AT hook, DNA-binding motif	C25G4.4	1
	C38D4.3	1
	C43E11.10	1
	C44F1.2	1
	F26H11.2	1
	F37A4.8	1
	H20J04.2	1
	T23G5.6	1
	Y108G3AL.7	1
	Y18D10A.1	1
AT hook, DNA-binding motif Total		10
Ataxin-1/HBP1 module (AXH)	K04F10.1	1
Ataxin-1/HBP1 module (AXH) Total		1
Ataxin-2, C-terminal	D2045.1	1
Ataxin-2, C-terminal Total		1
Ataxin, AXH domain	K04F10.1	1
Ataxin, AXH domain Total		1
ATP dependent DNA ligase, C-terminal	C29A12.3	1
ATP dependent DNA ligase, C-terminal Total		1
ATP dependent DNA ligase, central	C03D6.3	1
	C07H6.1	1
	C29A12.3	1
	F23F1.5	1
ATP dependent DNA ligase, central Total		4
ATP-citrate lyase/succinyl-CoA ligase	B0365.1	1
	C05G5.4	1
	C50F7.4	1
	D1005.1	1
	F23H11.3	1
	F47B10.1	1
ATP-citrate lyase/succinyl-CoA ligase Total		6
ATP-citrate lyase/succinyl-CoA ligase, active site	B0365.1	1
	C05G5.4	1
	D1005.1	1
	F23H11.3	1
ATP-citrate lyase/succinyl-CoA ligase, active site Total		4
ATP-citrate synthase	B0365.1	1
	D1005.1	1
ATP-citrate synthase Total		2
ATP-cone	T23G5.1	1
ATP-cone Total		1
ATP-dependent DNA ligase	C29A12.3	1
ATP-dependent DNA ligase Total		1
ATP-dependent DNA ligase, conserved site	C29A12.3	1
	D2045.2	1
ATP-dependent DNA ligase, conserved site Total		2
ATP-grasp fold	D2023.2	1
	D2085.1	1
	F27D9.5	1
	F32B6.2	1
	F38B6.4	1
	F47B10.1	1
	T28F3.5	1
	W09B6.1	1
	Y38C1BA.2	1
ATP-grasp fold Total		9
ATP-grasp fold, ATP-dependent carboxylate-amine ligase-type	D2023.2	1
	D2085.1	1
	F32B6.2	1
ATP-grasp fold, ATP-dependent carboxylate-amine ligase-type Total		3
ATP-grasp fold, RimK-type	D2023.2	1
ATP-grasp fold, RimK-type Total		1
ATP-grasp fold, succinyl-CoA synthetase-type	C50F7.4	1
	D1005.1	1
	F47B10.1	1
ATP-grasp fold, succinyl-CoA synthetase-type Total		3
ATP-NAD kinase-like, eukaryotic	Y17G7B.10	1
ATP-NAD kinase-like, eukaryotic Total		1
ATP-NAD/AcoX kinase	Y17G7B.10	1
	Y77E11A.2	1
ATP-NAD/AcoX kinase Total		2
ATP:guanido phosphotransferase	F11G11.13	1
	F32B5.1	1
	F44G3.2	1
	F46H5.3	1
	W10C8.5	1
	ZC434.8	1
ATP:guanido phosphotransferase Total		6
ATP12, ATPase F1F0-assembly protein	Y116A8C.27	1
ATP12, ATPase F1F0-assembly protein Total		1
ATPase-like, ATP-binding domain	C47E8.5	1
	H12C20.2	1
	K12D12.1	1
	R05D3.1	1
	R151.7	1
	T05E11.3	1
	T28A8.7	1
	ZK370.5	1
ATPase-like, ATP-binding domain Total		8
ATPase-like, ParA/MinD	F10G8.6	1
ATPase-like, ParA/MinD Total		1
ATPase, AAA-2	D2030.2	1
	K07A3.3	1
ATPase, AAA-2 Total		2
ATPase, AAA-3	C06A1.1	1
	C41C4.8	1
	C52E4.4	1
	F23F1.8	1
	F23F12.6	1
	F29G9.5	1
	F55F10.1	1
	F56F11.4	1
	Y48C3A.7	1
	Y49E10.1	1
	Y75B8A.4	1
ATPase, AAA-3 Total		11
ATPase, AAA-5	C24B5.2	1
	C34B2.6	1
	C41C4.8	1
	D2030.2	1
	F11C1.5	1
	F18C12.1	1
	F23F12.6	1
	F32D1.1	1
	F32D1.10	1
	F55F10.1	1
	F56F11.4	1
	F56H1.4	1
	K04D7.2	1
	M03C11.5	1
	R10E4.4	1
	T21E12.4	1
	Y17G7B.5	1
	Y39G10AR.14	1
	Y49E10.1	1
	Y75B8A.4	1
ATPase, AAA-5 Total		20
ATPase, AAA-type, CDC48	C06A1.1	1
	C41C4.8	1
ATPase, AAA-type, CDC48 Total		2
ATPase, AAA-type, conserved site	C06A1.1	1
	C11H1.4	1
	C24B5.2	1
	C41C4.8	1
	C52E4.4	1
	F10B5.5	1
	F11A10.1	1
	F23F1.8	1
	F23F12.6	1
	F29G9.5	1
	F32D1.1	1
	F54C9.6	1
	F56F11.4	1
	F56H1.4	1
	H15N14.2	1
	K04D7.2	1
	M03C11.5	1
	T01G9.5	1
	Y34D9A.10	1
	Y47G6A.10	1
	Y48C3A.7	1
	Y49E10.1	1
ATPase, AAA-type, conserved site Total		22
ATPase, AAA-type, core	C06A1.1	1
	C11H1.4	1
	C24B5.2	1
	C34B2.6	1
	C41C4.8	1
	C52E4.4	1
	C54G10.2	1
	D2030.2	1
	E02H1.6	1
	F10B5.5	1
	F11A10.1	1
	F23F1.8	1
	F23F12.6	1
	F29G9.5	1
	F31E3.3	1
	F32D1.1	1
	F39G3.7	1
	F44B9.8	1
[truncated: 19,397 more rows]

## Sheet: C) genes with InterPro (6951)
Gene ID	Interpro ID	Interpro Description
2RSSE.1	IPR000198	RhoGAP
4R79.1	IPR001506	Peptidase M12A, astacin
4R79.1	IPR003582	Metridin-like ShK toxin
4R79.1	IPR006026	Peptidase, metallopeptidase
4R79.2	IPR002041	Ran GTPase
4R79.2	IPR003577	Ras small GTPase, Ras type
4R79.2	IPR003578	Small GTPase, Rho type
4R79.2	IPR003579	Ras small GTPase, Rab type
4R79.2	IPR005225	Small GTP-binding protein
4R79.2	IPR013684	MIRO-like
4R79.2	IPR013753	Ras
AC3.5	IPR000209	Peptidase S8/S53, subtilisin/kexin/sedolisin
AC3.5	IPR014782	Peptidase M1, membrane alanine aminopeptidase, N-terminal
AC3.6	IPR002486	Nematode cuticle collagen, N-terminal
AC3.6	IPR008160	Collagen triple helix repeat
AC3.7	IPR002213	UDP-glucuronosyl/UDP-glucosyltransferase
AC3.7	IPR007235	Glycosyl transferase, family 28, C-terminal
AC3.8	IPR002213	UDP-glucuronosyl/UDP-glucosyltransferase
AC3.8	IPR007235	Glycosyl transferase, family 28, C-terminal
AC7.2	IPR001611	Leucine-rich repeat
AC7.2	IPR003591	Leucine-rich repeat, typical subtype
AH6.2	IPR004686	Tricarboxylate/iron carrier
B0024.1	IPR002486	Nematode cuticle collagen, N-terminal
B0024.1	IPR008160	Collagen triple helix repeat
B0024.11	IPR001656	Pseudouridine synthase, TruD
B0024.11	IPR011760	Pseudouridine synthase, TruD, insertion domain
B0024.11	IPR017091	Pseudouridine synthase TruD, eukaryotic
B0024.11	IPR020119	Pseudouridine synthase TruD, conserved site
B0024.12	IPR000182	GCN5-related N-acetyltransferase
B0024.13	IPR001104	3-oxo-5-alpha-steroid 4-dehydrogenase, C-terminal
B0024.14	IPR000867	Insulin-like growth factor-binding protein, IGFBP
B0024.14	IPR001007	von Willebrand factor, type C
B0024.14	IPR004094	Proteinase inhibitor I15, antistasin-like
B0024.15	IPR002659	Glycosyl transferase, family 31
B0024.2	IPR002486	Nematode cuticle collagen, N-terminal
B0024.2	IPR008160	Collagen triple helix repeat
B0024.8	IPR000357	HEAT
B0024.8	IPR019775	WD40 repeat, conserved site
B0024.9	IPR013766	Thioredoxin domain
B0024.9	IPR017936	Thioredoxin-like
B0024.9	IPR017937	Thioredoxin, conserved site
B0025.1	IPR000403	Phosphatidylinositol 3-/4-kinase, catalytic
B0025.1	IPR001263	Phosphoinositide 3-kinase, accessory (PIK) domain
B0025.1	IPR002420	Phosphoinositide 3-kinase, C2
B0025.1	IPR008290	Phosphatidylinositol 3-kinase, Vps34 type
B0025.1	IPR018936	Phosphatidylinositol 3/4-kinase, conserved site
B0025.2	IPR000717	Proteasome component (PCI) domain
B0025.2	IPR013143	PCI/PINT associated module
B0025.4	IPR015418	Histone H4 acetyltransferase, NuA4 complex, Eaf6
B0034.3	IPR002126	Cadherin
B0035.1	IPR003656	Zinc finger, BED-type predicted
B0035.1	IPR007087	Zinc finger, C2H2-type
B0035.1	IPR015880	Zinc finger, C2H2-like
B0035.10	IPR000164	Histone H3
B0035.10	IPR007125	Histone core
B0035.12	IPR000504	RNA recognition motif, RNP-1
B0035.12	IPR003107	RNA-processing protein, HAT helix
B0035.12	IPR008669	Lsm interaction
B0035.14	IPR001623	Heat shock protein DnaJ, N-terminal
B0035.14	IPR015399	Protein of unknown function DUF1977, DnaJ-like
B0035.14	IPR018253	Heat shock protein DnaJ, conserved site
B0035.16	IPR004506	tRNA-specific 2-thiouridylase
B0035.16	IPR018317	Queuosine synthesis-like
B0035.16	IPR020536	Thiamine biosynthesis protein, C-terminal
B0035.2	IPR001623	Heat shock protein DnaJ, N-terminal
B0035.2	IPR018253	Heat shock protein DnaJ, conserved site
B0035.3	IPR002589	Appr-1-p processing
B0035.4	IPR002777	Prefoldin beta-like
B0035.4	IPR016661	Prefoldin, subunit 4
B0035.5	IPR001282	Glucose-6-phosphate dehydrogenase
B0035.5	IPR019796	Glucose-6-phosphate dehydrogenase, active site
B0035.7	IPR002119	Histone H2A
B0035.7	IPR003958	Transcription factor CBF/NF-Y/archaeal histone
B0035.7	IPR007125	Histone core
B0035.8	IPR000558	Histone H2B
B0035.8	IPR007125	Histone core
B0035.9	IPR001951	Histone H4
B0035.9	IPR004823	TATA box binding protein associated factor (TAF)
B0035.9	IPR007125	Histone core
B0035.9	IPR019809	Histone H4, conserved site
B0041.3	IPR002482	Peptidoglycan-binding Lysin subgroup
B0041.3	IPR018392	Peptidoglycan-binding lysin domain
B0041.4	IPR002136	Ribosomal protein L4/L1e
B0041.4	IPR013000	Ribosomal protein L4/L1e, eukaryotic/archaeal, conserved site
B0041.5	IPR010916	TonB box, conserved site
B0041.6	IPR007115	6-pyruvoyl tetrahydropterin synthase-related
B0041.6	IPR007116	6-pyruvoyl tetrahydropterin synthase
B0041.7	IPR000330	SNF2-related
B0041.7	IPR001650	DNA/RNA helicase, C-terminal
B0041.7	IPR014001	DEAD-like helicase, N-terminal
B0041.7	IPR014021	Helicase, superfamily 1/2, ATP-binding domain
B0205.11	IPR020070	Ribosomal protein L9, N-terminal
B0205.3	IPR003903	Ubiquitin interacting motif
B0205.4	IPR002516	Glycosyl transferase, family 11
B0205.6	IPR000192	Aminotransferase, class V/Cysteine desulfurase
B0205.6	IPR001597	Aromatic amino acid beta-eliminating lyase/threonine aldolase
B0205.6	IPR010240	Cysteine desulfurase
B0205.6	IPR016454	Cysteine desulfurase, NifS
B0205.6	IPR020578	Aminotransferase class-V pyridoxal-phosphate binding site
B0205.7	IPR000719	Protein kinase, catalytic domain
B0205.7	IPR001245	Serine/threonine/tyrosine-protein kinase
B0205.7	IPR002290	Serine/threonine-protein kinase domain
B0205.7	IPR008271	Serine/threonine-protein kinase, active site
B0205.7	IPR017441	Protein kinase, ATP binding site
B0205.7	IPR017442	Serine/threonine-protein kinase-like domain
B0205.7	IPR020635	Tyrosine-protein kinase, catalytic domain
B0207.12	IPR006029	Neurotransmitter-gated ion-channel transmembrane domain
B0207.12	IPR006201	Neurotransmitter-gated ion-channel
B0207.12	IPR006202	Neurotransmitter-gated ion-channel ligand-binding
B0207.12	IPR007110	Immunoglobulin-like
B0207.12	IPR018000	Neurotransmitter-gated ion-channel, conserved site
B0207.4	IPR000719	Protein kinase, catalytic domain
B0207.4	IPR001245	Serine/threonine/tyrosine-protein kinase
B0207.4	IPR002290	Serine/threonine-protein kinase domain
B0207.4	IPR008271	Serine/threonine-protein kinase, active site
B0207.4	IPR017441	Protein kinase, ATP binding site
B0207.4	IPR017442	Serine/threonine-protein kinase-like domain
B0207.4	IPR020635	Tyrosine-protein kinase, catalytic domain
B0207.6	IPR004130	Protein of unknown function, ATP binding
B0212.1	IPR004878	Otopetrin
B0212.5	IPR002110	Ankyrin repeat
B0212.5	IPR004729	Transient receptor potential channel
B0212.5	IPR005821	Ion transport
B0212.5	IPR020683	Ankyrin repeat-containing domain
B0213.10	IPR001128	Cytochrome P450
B0213.10	IPR017972	Cytochrome P450, conserved site
B0213.11	IPR001128	Cytochrome P450
B0213.11	IPR017972	Cytochrome P450, conserved site
B0213.12	IPR001128	Cytochrome P450
B0213.12	IPR017972	Cytochrome P450, conserved site
B0213.14	IPR001128	Cytochrome P450
B0213.14	IPR017972	Cytochrome P450, conserved site
B0213.15	IPR001128	Cytochrome P450
B0213.15	IPR017972	Cytochrome P450, conserved site
B0213.16	IPR001128	Cytochrome P450
B0213.16	IPR017972	Cytochrome P450, conserved site
B0218.1	IPR000120	Amidase
B0218.1	IPR015830	Amidase, fungi
B0218.1	IPR020556	Amidase, conserved site
B0218.2	IPR000120	Amidase
B0218.2	IPR015830	Amidase, fungi
B0218.2	IPR020556	Amidase, conserved site
B0218.3	IPR000719	Protein kinase, catalytic domain
B0218.3	IPR001245	Serine/threonine/tyrosine-protein kinase
B0218.3	IPR002290	Serine/threonine-protein kinase domain
B0218.3	IPR003527	MAP kinase, conserved site
B0218.3	IPR017441	Protein kinase, ATP binding site
B0218.3	IPR017442	Serine/threonine-protein kinase-like domain
B0218.3	IPR020635	Tyrosine-protein kinase, catalytic domain
B0218.5	IPR000719	Protein kinase, catalytic domain
B0218.5	IPR002290	Serine/threonine-protein kinase domain
B0218.5	IPR017441	Protein kinase, ATP binding site
B0218.5	IPR017442	Serine/threonine-protein kinase-like domain
B0218.6	IPR001304	C-type lectin
B0218.8	IPR001304	C-type lectin
B0222.2	IPR001204	Phosphate transporter
B0222.3	IPR001204	Phosphate transporter
B0222.4	IPR000192	Aminotransferase, class V/Cysteine desulfurase
B0222.4	IPR002129	Pyridoxal phosphate-dependent decarboxylase
B0222.6	IPR002486	Nematode cuticle collagen, N-terminal
B0222.6	IPR008160	Collagen triple helix repeat
B0222.7	IPR002486	Nematode cuticle collagen, N-terminal
B0222.7	IPR008160	Collagen triple helix repeat
B0222.7	IPR009765	Pericardin-like prepeat
B0222.8	IPR002486	Nematode cuticle collagen, N-terminal
B0222.8	IPR008160	Collagen triple helix repeat
B0222.9	IPR000674	Aldehyde oxidase/xanthine dehydrogenase, a/b hammerhead
B0222.9	IPR001041	Ferredoxin
B0222.9	IPR002346	Molybdopterin dehydrogenase, FAD-binding
B0222.9	IPR002888	[2Fe-2S]-binding
B0222.9	IPR006058	2Fe-2S ferredoxin, iron-sulphur binding site
B0222.9	IPR008274	Aldehyde oxidase/xanthine dehydrogenase, molybdopterin binding
B0222.9	IPR016166	FAD-binding, type 2
B0222.9	IPR017441	Protein kinase, ATP binding site
B0228.5	IPR013766	Thioredoxin domain
B0228.5	IPR017936	Thioredoxin-like
B0228.5	IPR017937	Thioredoxin, conserved site
B0228.7	IPR000845	Nucleoside phosphorylase
B0228.7	IPR010044	Methylthioadenosine phosphorylase
B0228.7	IPR018099	Purine phosphorylase, family 2, conserved site
B0238.10	IPR000182	GCN5-related N-acetyltransferase
B0240.1	IPR001905	Ammonium transporter
B0240.2	IPR012858	DC-STAMP-like
B0240.4	IPR019049	Nucleoporin protein Ndc1-Nup
B0244.2	IPR000209	Peptidase S8/S53, subtilisin/kexin/sedolisin
B0244.2	IPR000242	Protein-tyrosine phosphatase, receptor/non-receptor type
B0244.2	IPR000387	Dual-specific/protein-tyrosine phosphatase, conserved region
B0244.2	IPR003595	Protein-tyrosine phosphatase, catalytic
B0250.1	IPR002171	Ribosomal protein L2
B0250.5	IPR002204	3-hydroxyisobutyrate dehydrogenase-related, conserved site
B0250.5	IPR006115	6-phosphogluconate dehydrogenase, NAD-binding
B0250.5	IPR011548	3-hydroxyisobutyrate dehydrogenase
B0250.9	IPR001171	Ergosterol biosynthesis ERG4/ERG24
B0252.2	IPR004843	Metallophosphoesterase
B0252.2	IPR008139	Saposin B
B0252.2	IPR011160	Sphingomyelin phosphodiesterase
B0252.4	IPR002130	Peptidyl-prolyl cis-trans isomerase, cyclophilin-type
B0252.4	IPR020892	Peptidyl-prolyl cis-trans isomerase, cyclophilin-type, conserved site
B0261.1	IPR001005	SANT, DNA-binding
B0261.1	IPR014778	Myb, DNA-binding
B0261.2	IPR000403	Phosphatidylinositol 3-/4-kinase, catalytic
B0261.2	IPR003151	PIK-related kinase, FAT
B0261.2	IPR003152	PIK-related kinase, FATC
B0261.2	IPR009076	FKBP12-rapamycin-associated protein, FKBP12-rapamycin-binding
B0261.2	IPR014009	PIK-related kinase
B0261.2	IPR018936	Phosphatidylinositol 3/4-kinase, conserved site
B0261.4	IPR010729	Ribosomal protein L47, mitochondrial
B0272.1	IPR003008	Tubulin/FtsZ, GTPase domain
B0272.1	IPR013838	Beta tubulin, autoregulation binding site
B0272.1	IPR017975	Tubulin, conserved site
B0272.1	IPR018316	Tubulin/FtsZ, 2-layer sandwich domain
B0272.3	IPR006076	FAD dependent oxidoreductase
B0272.3	IPR006108	3-hydroxyacyl-CoA dehydrogenase, C-terminal
B0272.3	IPR006176	3-hydroxyacyl-CoA dehydrogenase, NAD binding
B0272.3	IPR006180	3-hydroxyacyl-CoA dehydrogenase, conserved site
B0272.4	IPR001753	Crotonase, core
B0273.2	IPR001313	Pumilio RNA-binding repeat
B0273.4	IPR000488	Death
B0273.4	IPR000884	Thrombospondin, type 1 repeat
B0273.4	IPR000906	ZU5
B0273.4	IPR003598	Immunoglobulin subtype 2
B0273.4	IPR003599	Immunoglobulin subtype
B0273.4	IPR007110	Immunoglobulin-like
B0273.4	IPR013106	Immunoglobulin V-set
B0280.1	IPR001330	Prenyltransferase/squalene oxidase
B0280.12	IPR001320	Ionotropic glutamate receptor
B0280.12	IPR001638	Extracellular solute-binding protein, family 3
B0280.12	IPR001828	Extracellular ligand-binding receptor
B0280.12	IPR019594	Glutamate receptor, L-glutamate/glycine-binding
B0280.17	IPR004087	K Homology
B0280.3	IPR004788	Ribose 5-phosphate isomerase, type A
B0280.9	IPR001680	WD40 repeat
B0280.9	IPR019781	WD40 repeat, subgroup
B0281.3	IPR000315	Zinc finger, B-box
B0281.3	IPR001841	Zinc finger, RING-type
B0281.3	IPR017907	Zinc finger, RING-type, conserved site
B0281.3	IPR018957	Zinc finger, C3HC4 RING-type
B0281.4	IPR003131	Potassium channel, voltage dependent, Kv, tetramerisation
B0281.5	IPR000210	BTB/POZ-like
B0281.5	IPR003131	Potassium channel, voltage dependent, Kv, tetramerisation
B0281.6	IPR000210	BTB/POZ-like
B0281.6	IPR003131	Potassium channel, voltage dependent, Kv, tetramerisation
B0281.8	IPR000315	Zinc finger, B-box
B0281.8	IPR001841	Zinc finger, RING-type
B0281.8	IPR017907	Zinc finger, RING-type, conserved site
B0281.8	IPR018957	Zinc finger, C3HC4 RING-type
B0285.1	IPR000719	Protein kinase, catalytic domain
B0285.1	IPR001245	Serine/threonine/tyrosine-protein kinase
B0285.1	IPR002290	Serine/threonine-protein kinase domain
B0285.1	IPR008271	Serine/threonine-protein kinase, active site
B0285.1	IPR017441	Protein kinase, ATP binding site
B0285.1	IPR017442	Serine/threonine-protein kinase-like domain
B0285.1	IPR020635	Tyrosine-protein kinase, catalytic domain
B0285.10	IPR002573	Choline/ethanolamine kinase
B0285.10	IPR002575	Aminoglycoside phosphotransferase
B0285.4	IPR007213	Leucine carboxyl methyltransferase
B0285.4	IPR016651	Leucine carboxyl methyltransferase, LCTM1 1
B0285.5	IPR010598	D-glucuronyl C5-epimerase
B0285.6	IPR001898	Sodium/sulphate symporter
B0285.8	IPR002573	Choline/ethanolamine kinase
B0285.8	IPR002575	Aminoglycoside phosphotransferase
B0285.9	IPR002573	Choline/ethanolamine kinase
B0285.9	IPR002575	Aminoglycoside phosphotransferase
B0286.2	IPR000203	GPS domain
B0286.2	IPR000742	EGF-like, type 3
B0286.2	IPR000832	GPCR, family 2, secretin-like
B0286.2	IPR000922	D-galactoside/L-rhamnose binding SUEL lectin
B0286.2	IPR001304	C-type lectin
B0286.2	IPR001879	GPCR, family 2, extracellular hormone receptor domain
B0286.2	IPR013032	EGF-like region, conserved site
B0286.2	IPR017981	GPCR, family 2-like
B0286.3	IPR000031	1-(5-Phosphoribosyl)-5-amino-4-imidazole-carboxylate (AIR) carboxylase
B0286.3	IPR001636	SAICAR synthetase
B0286.3	IPR018236	SAICAR synthetase, conserved site
B0286.4	IPR007282	NOT2/NOT3/NOT5
B0286.5	IPR001766	Transcription factor, fork head
B0286.5	IPR018122	Transcription factor, fork head, conserved site
B0302.1	IPR000719	Protein kinase, catalytic domain
B0302.1	IPR001245	Serine/threonine/tyrosine-protein kinase
B0302.1	IPR001452	Src homology-3 domain
B0302.1	IPR002290	Serine/threonine-protein kinase domain
B0302.1	IPR008266	Tyrosine-protein kinase, active site
B0302.1	IPR011511	Variant SH3
B0302.1	IPR015116	GTPase binding
B0302.1	IPR017441	Protein kinase, ATP binding site
B0302.1	IPR017442	Serine/threonine-protein kinase-like domain
B0302.1	IPR020635	Tyrosine-protein kinase, catalytic domain
B0303.11	IPR004841	Amino acid permease domain
B0303.15	IPR000911	Ribosomal protein L11
B0303.15	IPR020783	Ribosomal protein L11, C-terminal
B0303.15	IPR020784	Ribosomal protein L11, N-terminal
B0303.2	IPR000940	Methyltransferase, NNMT/PNMT/TEMT
B0303.3	IPR002155	Thiolase
B0303.3	IPR020610	Thiolase, active site
B0303.3	IPR020613	Thiolase, conserved site
B0303.3	IPR020615	Thiolase, acyl-enzyme intermediate active site
B0303.3	IPR020616	Thiolase, N-terminal
B0303.3	IPR020617	Thiolase, C-terminal
B0303.4	IPR000626	Ubiquitin
B0303.4	IPR019955	Ubiquitin supergroup
B0303.7	IPR001452	Src homology-3 domain
B0303.7	IPR011511	Variant SH3
B0303.9	IPR001619	Sec1-like protein
B0304.1	IPR001092	Helix-loop-helix DNA-binding domain
B0304.3	IPR001128	Cytochrome P450
B0304.3	IPR017972	Cytochrome P450, conserved site
B0331.1	IPR001128	Cytochrome P450
B0331.1	IPR017972	Cytochrome P450, conserved site
B0331.2	IPR001204	Phosphate transporter
B0334.3	IPR011766	Thiamine pyrophosphate enzyme, C-terminal TPP-binding
B0334.3	IPR012000	Thiamine pyrophosphate enzyme, central domain
B0334.3	IPR012001	Thiamine pyrophosphate enzyme, N-terminal TPP-binding domain
B0334.4	IPR006797	PRELI/MSF1
B0334.5	IPR002060	Squalene/phytoene synthase
B0334.5	IPR018937	Magnesium transporter
B0334.6	IPR000276	7TM GPCR, rhodopsin-like
B0334.6	IPR017452	GPCR, rhodopsin-like superfamily
B0334.6	IPR019427	7TM GPCR, serpentine receptor class w (Srw)
B0334.8	IPR000341	Phosphoinositide 3-kinase, ras-binding
B0334.8	IPR000403	Phosphatidylinositol 3-/4-kinase, catalytic
B0334.8	IPR001263	Phosphoinositide 3-kinase, accessory (PIK) domain
B0334.8	IPR002420	Phosphoinositide 3-kinase, C2
B0334.8	IPR003113	Phosphatidylinositol 3-kinase, p85-binding
B0334.8	IPR018936	Phosphatidylinositol 3/4-kinase, conserved site
B0336.10	IPR000218	Ribosomal protein L14b/L23e
B0336.10	IPR019972	Ribosomal protein L14 conserved site
B0336.11	IPR000535	Major sperm protein
B0336.11	IPR001251	Cellular retinaldehyde-binding/triple function, C-terminal
B0336.11	IPR018247	EF-Hand 1, calcium-binding site
B0336.13	IPR015871	Transcription initiation factor IIA, gamma subunit, C-terminal
B0336.13	IPR015872	Transcription initiation factor IIA, gamma subunit, N-terminal
B0336.2	IPR003579	Ras small GTPase, Rab type
B0336.2	IPR005225	Small GTP-binding protein
B0336.2	IPR006687	Small GTPase SAR1-type
B0336.2	IPR006688	ADP-ribosylation factor
B0336.2	IPR006689	ARF/SAR superfamily
B0336.2	IPR013684	MIRO-like
B0336.2	IPR013753	Ras
B0336.2	IPR019009	Signal recognition particle receptor, beta subunit
B0336.3	IPR000504	RNA recognition motif, RNP-1
B0336.3	IPR000571	Zinc finger, CCCH-type
B0336.4	IPR000342	Regulator of G protein signalling
B0336.6	IPR001452	Src homology-3 domain
B0336.6	IPR011511	Variant SH3
B0336.6	IPR012849	Abl-interactor, homeo-domain homologous region
B0336.8	IPR007242	Autophagy-related protein 12
B0336.9	IPR000061	SWAP/Surp
B0336.9	IPR019147	Splicing factor, suppressor of white apricot
B0348.4	IPR000008	C2 calcium-dependent membrane targeting
B0348.4	IPR000909	Phospholipase C, phosphatidylinositol-specific , X domain
B0348.4	IPR001711	Phospholipase C, phosphatidylinositol-specific, Y domain
B0348.4	IPR015359	Phospholipase C, phosphoinositol-specific, EF-hand-like
B0348.4	IPR018029	C2 membrane targeting protein
B0348.6	IPR001040	Eukaryotic translation initiation factor 4E (eIF-4E)
B0348.6	IPR019770	Eukaryotic translation initiation factor 4E (eIF-4E), conserved site
B0350.2	IPR000488	Death
B0350.2	IPR000906	ZU5
B0350.2	IPR002110	Ankyrin repeat
B0350.2	IPR018120	Glycoside hydrolase, family 1, active site
B0350.2	IPR020683	Ankyrin repeat-containing domain
B0361.10	IPR001388	Synaptobrevin
B0361.10	IPR010908	Longin
B0361.2	IPR006767	Cwf19-like protein, C-terminal domain-2
B0361.2	IPR006768	Cwf19-like, C-terminal domain-1
B0361.5	IPR003817	Phosphatidylserine decarboxylase-related
B0361.5	IPR005221	Phosphatidylserine decarboxylase
B0361.6	IPR003750	Protein of unknown function DUF171
B0361.7	IPR000560	Histidine phosphatase superfamily, clade-2
B0361.8	IPR001296	Glycosyl transferase, group 1
B0365.1	IPR003781	CoA-binding
B0365.1	IPR005810	Succinyl-CoA ligase, alpha subunit
B0365.1	IPR005811	ATP-citrate lyase/succinyl-CoA ligase
B0365.1	IPR014608	ATP-citrate synthase
B0365.1	IPR017440	ATP-citrate lyase/succinyl-CoA ligase, active site
B0365.1	IPR017866	Succinyl-CoA synthetase, beta subunit, conserved site
B0365.3	IPR001757	ATPase, P-type, K/Mg/Cd/Cu/Zn/Na/Ca/Na/H-transporter
B0365.3	IPR004014	ATPase, P-type cation-transporter, N-terminal
B0365.3	IPR005775	ATPase, P-type cation exchange, alpha subunit, eukaryotic
B0365.3	IPR005834	Haloacid dehalogenase-like hydrolase
B0365.3	IPR006068	ATPase, P-type cation-transporter, C-terminal
B0365.3	IPR008250	ATPase, P-type, ATPase-associated domain
B0365.3	IPR018303	ATPase, P-type phosphorylation site
B0365.6	IPR000859	CUB
B0365.6	IPR001304	C-type lectin
B0365.6	IPR018378	C-type lectin, conserved site
B0379.4	IPR004274	NLI interacting factor
B0379.4	IPR011948	Dullard-like phosphatase domain
B0393.1	IPR001865	Ribosomal protein S2
B0393.1	IPR005707	Ribosomal protein S2, eukaryotic/archaeal
B0393.1	IPR018130	Ribosomal protein S2, conserved site
B0393.2	IPR000195	RabGAP/TBC
B0393.5	IPR000152	EGF-type aspartate/asparagine hydroxylation site
B0393.5	IPR000742	EGF-like, type 3
B0393.5	IPR001881	EGF-like calcium-binding
B0393.5	IPR003886	Nidogen, extracellular domain
B0393.5	IPR006209	EGF
B0393.5	IPR006210	EGF-like
B0393.5	IPR013032	EGF-like region, conserved site
B0393.5	IPR013091	EGF calcium-binding
B0393.5	IPR018097	EGF-like calcium-binding, conserved site
B0395.1	IPR004709	Na+/H+ exchanger, subfamily
B0395.1	IPR006153	Cation/H+ exchanger
B0395.2	IPR004299	Membrane bound O-acyl transferase, MBOAT
B0395.3	IPR000542	Acyltransferase ChoActase/COT/CPT
B0399.1	IPR004178	Calmodulin-binding domain
B0399.1	IPR011996	Potassium channel, calcium-activated, SK, conserved region
B0399.1	IPR013099	Ion transport 2
B0403.2	IPR000608	Ubiquitin-conjugating enzyme, E2
B0403.4	IPR005788	Disulphide isomerase
B0403.4	IPR013766	Thioredoxin domain
B0403.4	IPR017936	Thioredoxin-like
B0403.4	IPR017937	Thioredoxin, conserved site
B0410.2	IPR009539	Strabismus
B0412.1	IPR003380	Transforming protein Ski
B0412.2	IPR001839	Transforming growth factor beta
B0412.2	IPR016319	Transforming growth factor-beta
B0412.2	IPR017948	Transforming growth factor beta, conserved site
B0412.4	IPR001209	Ribosomal protein S14
B0412.4	IPR018271	Ribosomal protein S14, conserved site
B0414.2	IPR013524	Acute myeloid leukemia 1 (AML 1)/Runt
B0414.3	IPR005818	Histone H1/H5
B0414.5	IPR000504	RNA recognition motif, RNP-1
B0414.6	IPR000629	RNA helicase, ATP-dependent, DEAD-box, conserved site
B0414.6	IPR001650	DNA/RNA helicase, C-terminal
B0414.6	IPR001878	Zinc finger, CCHC-type
B0414.6	IPR011545	DNA/RNA helicase, DEAD/DEAH box type, N-terminal
B0414.6	IPR014001	DEAD-like helicase, N-terminal
B0414.6	IPR014014	RNA helicase, DEAD-box type, Q motif
B0414.6	IPR014021	Helicase, superfamily 1/2, ATP-binding domain
B0414.7	IPR000719	Protein kinase, catalytic domain
B0414.7	IPR001245	Serine/threonine/tyrosine-protein kinase
B0414.7	IPR002290	Serine/threonine-protein kinase domain
B0414.7	IPR008271	Serine/threonine-protein kinase, active site
B0414.7	IPR017442	Serine/threonine-protein kinase-like domain
B0414.7	IPR020635	Tyrosine-protein kinase, catalytic domain
B0414.8	IPR014812	Vps51/Vps67
B0416.1	IPR012496	TMC
B0416.5	IPR011701	Major facilitator superfamily MFS-1
B0416.6	IPR004139	Glycosyl transferase, family 13
B0432.13	IPR001841	Zinc finger, RING-type
B0432.13	IPR018957	Zinc finger, C3HC4 RING-type
B0432.2	IPR002818	ThiJ/PfpI
B0432.2	IPR006287	DJ-1
B0432.4	IPR018108	Mitochondrial substrate/solute carrier
B0432.5	IPR018301	Aromatic amino acid hydroxylase, iron/copper binding site
B0432.5	IPR019773	Tyrosine 3-monooxygenase-like
B0432.5	IPR019774	Aromatic amino acid hydroxylase, C-terminal
B0432.8	IPR001130	Deoxyribonuclease, TatD-related
B0432.8	IPR012278	Deoxyribonuclease, TatD Mg-dependent
B0432.8	IPR018228	Deoxyribonuclease, TatD-related, conserved site
B0454.6	IPR002293	Amino acid/polyamine transporter I
B0454.6	IPR004841	Amino acid permease domain
B0454.7	IPR000859	CUB
B0454.7	IPR001304	C-type lectin
B0454.7	IPR018378	C-type lectin, conserved site
B0457.1	IPR000203	GPS domain
B0457.1	IPR000832	GPCR, family 2, secretin-like
B0457.1	IPR000922	D-galactoside/L-rhamnose binding SUEL lectin
B0457.1	IPR001879	GPCR, family 2, extracellular hormone receptor domain
B0457.1	IPR017981	GPCR, family 2-like
B0464.1	IPR004364	Aminoacyl-tRNA synthetase, class II (D/K/N)
B0464.1	IPR004365	Nucleic acid binding, OB-fold, tRNA/helicase-type
B0464.1	IPR004523	Aspartyl-tRNA synthetase, class IIb, archea/euk type
B0464.1	IPR006195	Aminoacyl-tRNA synthetase, class II, conserved domain
B0464.2	IPR001440	Tetratricopeptide TPR-1
B0464.2	IPR013026	Tetratricopeptide repeat-containing
B0464.2	IPR019734	Tetratricopeptide repeat
B0464.5	IPR000719	Protein kinase, catalytic domain
B0464.5	IPR001245	Serine/threonine/tyrosine-protein kinase
B0464.5	IPR002290	Serine/threonine-protein kinase domain
B0464.5	IPR008271	Serine/threonine-protein kinase, active site
B0464.5	IPR017441	Protein kinase, ATP binding site
B0464.5	IPR017442	Serine/threonine-protein kinase-like domain
B0464.5	IPR020635	Tyrosine-protein kinase, catalytic domain
B0464.6	IPR019176	Cytochrome B561-related, N-terminal
B0464.7	IPR004122	Barrier- to-autointegration factor, BAF
B0464.9	IPR000073	Alpha/beta hydrolase fold-1
B0464.9	IPR016812	Protein phosphatase methylesterase, eukaryotic
B0478.1	IPR000719	Protein kinase, catalytic domain
B0478.1	IPR001245	Serine/threonine/tyrosine-protein kinase
B0478.1	IPR002290	Serine/threonine-protein kinase domain
B0478.1	IPR003527	MAP kinase, conserved site
B0478.1	IPR008271	Serine/threonine-protein kinase, active site
B0478.1	IPR017442	Serine/threonine-protein kinase-like domain
B0478.1	IPR020635	Tyrosine-protein kinase, catalytic domain
B0491.1	IPR007704	Mannosyltransferase, DXD
B0491.2	IPR002486	Nematode cuticle collagen, N-terminal
B0491.2	IPR008160	Collagen triple helix repeat
B0491.7	IPR000878	Tetrapyrrole methylase
B0491.7	IPR004551	Diphthine synthase
B0491.8	IPR000644	Cystathionine beta-synthase, core
B0491.8	IPR001807	Chloride channel, voltage gated
B0491.8	IPR005829	Sugar transporter, conserved site
B0495.2	IPR000719	Protein kinase, catalytic domain
B0495.2	IPR001245	Serine/threonine/tyrosine-protein kinase
B0495.2	IPR002290	Serine/threonine-protein kinase domain
B0495.2	IPR008271	Serine/threonine-protein kinase, active site
B0495.2	IPR017442	Serine/threonine-protein kinase-like domain
B0495.2	IPR020635	Tyrosine-protein kinase, catalytic domain
B0495.4	IPR004709	Na+/H+ exchanger, subfamily
B0495.4	IPR006153	Cation/H+ exchanger
B0495.7	IPR002933	Peptidase M20
B0495.7	IPR007484	Peptidase M28
B0495.8	IPR004882	LUC7 related
B0496.3	IPR000719	Protein kinase, catalytic domain
B0496.3	IPR001245	Serine/threonine/tyrosine-protein kinase
B0496.3	IPR002290	Serine/threonine-protein kinase domain
B0496.3	IPR008271	Serine/threonine-protein kinase, active site
B0496.3	IPR017441	Protein kinase, ATP binding site
B0496.3	IPR017442	Serine/threonine-protein kinase-like domain
B0496.3	IPR018934	RIO-like kinase
B0496.3	IPR020635	Tyrosine-protein kinase, catalytic domain
B0496.7	IPR001781	Zinc finger, LIM-type
B0496.8	IPR001781	Zinc finger, LIM-type
B0496.8	IPR010442	PET domain
B0507.2	IPR004328	BRO1
B0511.1	IPR001179	Peptidyl-prolyl cis-trans isomerase, FKBP-type
B0511.1	IPR018247	EF-Hand 1, calcium-binding site
B0511.10	IPR000717	Proteasome component (PCI) domain
B0511.10	IPR016650	Translation initiation factor 3, subunit 6, eukaryotic
B0511.10	IPR019010	Eukaryotic translation initiation factor 3 (eIF3), subunit 6, N-terminal
B0511.12	IPR007735	Pecanex
B0511.13	IPR004843	Metallophosphoesterase
B0511.4	IPR000719	Protein kinase, catalytic domain
B0511.4	IPR001245	Serine/threonine/tyrosine-protein kinase
B0511.4	IPR002290	Serine/threonine-protein kinase domain
B0511.4	IPR008271	Serine/threonine-protein kinase, active site
B0511.4	IPR017441	Protein kinase, ATP binding site
B0511.4	IPR017442	Serine/threonine-protein kinase-like domain
B0511.4	IPR020635	Tyrosine-protein kinase, catalytic domain
B0511.6	IPR000629	RNA helicase, ATP-dependent, DEAD-box, conserved site
B0511.6	IPR001650	DNA/RNA helicase, C-terminal
B0511.6	IPR011545	DNA/RNA helicase, DEAD/DEAH box type, N-terminal
B0511.6	IPR014001	DEAD-like helicase, N-terminal
B0511.6	IPR014014	RNA helicase, DEAD-box type, Q motif
B0511.6	IPR014021	Helicase, superfamily 1/2, ATP-binding domain
B0511.7	IPR000253	Forkhead-associated
B0513.2	IPR008501	Tho complex subunit 7/Mft1p
B0513.3	IPR002673	Ribosomal protein L29e
B0513.5	IPR002872	Proline dehydrogenase
B0513.9	IPR001388	Synaptobrevin
B0513.9	IPR016444	Synaptobrevin, metazoa/fungi
B0523.5	IPR001611	Leucine-rich repeat
B0523.5	IPR003591	Leucine-rich repeat, typical subtype
B0523.5	IPR007122	Gelsolin
B0523.5	IPR007123	Gelsolin domain
B0524.2	IPR002641	Patatin
B0545.1	IPR000719	Protein kinase, catalytic domain
B0545.1	IPR000961	AGC-kinase, C-terminal
B0545.1	IPR001245	Serine/threonine/tyrosine-protein kinase
B0545.1	IPR002219	Protein kinase C-like, phorbol ester/diacylglycerol binding
B0545.1	IPR002290	Serine/threonine-protein kinase domain
B0545.1	IPR008271	Serine/threonine-protein kinase, active site
B0545.1	IPR014376	Protein kinase C, delta/epsilon/eta/theta types
B0545.1	IPR017441	Protein kinase, ATP binding site
B0545.1	IPR017442	Serine/threonine-protein kinase-like domain
B0545.1	IPR017892	Protein kinase, C-terminal
B0545.1	IPR020635	Tyrosine-protein kinase, catalytic domain
B0545.3	IPR001283	Allergen V5/Tpx-1 related
B0545.3	IPR014044	SCP-like extracellular
B0545.4	IPR008906	HAT dimerisation
B0546.2	IPR003323	Ovarian tumour, otubain
B0546.4	IPR004910	Yippee-like protein
B0547.1	IPR000555	Mov34/MPN/PAD-1
B0563.2	IPR018499	Tetraspanin
B0563.4	IPR006214	Bax inhibitor-1-related
B0564.1	IPR001247	Exoribonuclease, phosphorolytic domain 1
B0564.1	IPR004217	Mitochondrial inner membrane translocase complex, Tim8/9/10/13-zinc finger-like
B0564.1	IPR015847	Exoribonuclease, phosphorolytic domain 2
B0564.1	IPR018336	Ribonuclease PH, conserved site
B0564.10	IPR001356	Homeobox
B0564.10	IPR016233	Homeobox Pitx/unc30
B0564.10	IPR017970	Homeobox, conserved site
B0564.2	IPR005123	Oxoglutarate/iron-dependent oxygenase
B0564.3	IPR021134	Bestrophin-like
B0564.4	IPR021134	Bestrophin-like
BE0003N10.1	IPR001247	Exoribonuclease, phosphorolytic domain 1
BE0003N10.1	IPR003029	Ribosomal protein S1, RNA binding domain
BE0003N10.1	IPR012162	Polyribonucleotide nucleotidyltransferase
BE0003N10.1	IPR015847	Exoribonuclease, phosphorolytic domain 2
BE0003N10.1	IPR015848	Polynucleotide phosphorylase, phosphorolytic RNA-binding, bacterial/organelle-type
BE0003N10.1	IPR018111	K Homology, type 1, subgroup
BE0003N10.2	IPR000198	RhoGAP
BE0003N10.2	IPR000980	SH2 motif
BE0003N10.2	IPR002219	Protein kinase C-like, phorbol ester/diacylglycerol binding
BE0003N10.2	IPR017356	N-chimaerin
BE0003N10.3	IPR002485	Protein of unknown function DUF13
BE0003N10.3	IPR003006	Immunoglobulin/major histocompatibility complex, conserved site
BE0003N10.3	IPR003126	Zinc finger, N-recognin
BE0003N10.3	IPR006626	Parallel beta-helix repeat
BE0003N10.3	IPR006633	Carbohydrate-binding/sugar hydrolysis domain
BE0003N10.3	IPR013993	Zinc finger, N-recognin, metazoa
BE10.2	IPR006694	Fatty acid hydroxylase
C01A2.3	IPR001708	Membrane insertion protein, OxaA/YidC
C01A2.4	IPR005024	Snf7
C01B10.8	IPR001045	Spermine synthase
C01B10.8	IPR013216	Methyltransferase type 11
C01B10.8	IPR013217	Methyltransferase type 12
C01B10.9	IPR002591	Type I phosphodiesterase/nucleotide pyrophosphatase/phosphate transferase
C01B12.1	IPR002486	Nematode cuticle collagen, N-terminal
C01B12.1	IPR008160	Collagen triple helix repeat
C01B12.2	IPR000770	SAND
C01B12.3	IPR021134	Bestrophin-like
C01B12.5	IPR021134	Bestrophin-like
C01B4.6	IPR008183	Aldose 1-epimerase
C01B4.9	IPR011701	Major facilitator superfamily MFS-1
C01B7.4	IPR001452	Src homology-3 domain
C01B7.4	IPR001478	PDZ/DHR/GLGF
C01B7.4	IPR008144	Guanylate kinase
C01B7.4	IPR008145	Guanylate kinase/L-type calcium channel
C01B7.4	IPR011511	Variant SH3
C01B7.4	IPR020590	Guanylate kinase, conserved site
C01B7.6	IPR000315	Zinc finger, B-box
C01B7.6	IPR000408	Regulator of chromosome condensation, RCC1
C01B7.6	IPR001841	Zinc finger, RING-type
C01B7.6	IPR004939	Anaphase-promoting complex, subunit 10
C01B7.6	IPR006186	Serine/threonine-specific protein phosphatase/bis(5-nucleosyl)-tetraphosphatase
C01B7.6	IPR012983	PHR
C01C10.3	IPR002123	Phospholipid/glycerol acyltransferase
C01C4.3	IPR000719	Protein kinase, catalytic domain
C01C4.3	IPR001245	Serine/threonine/tyrosine-protein kinase
C01C4.3	IPR002290	Serine/threonine-protein kinase domain
C01C4.3	IPR017441	Protein kinase, ATP binding site
C01C4.3	IPR017442	Serine/threonine-protein kinase-like domain
C01C4.3	IPR020635	Tyrosine-protein kinase, catalytic domain
C01F1.1	IPR008851	Transcription initiation factor IIF, alpha subunit
C01F1.2	IPR003782	Copper chaperone SCO1/SenC
C01F1.2	IPR022272	Lipocalin conserved site
C01F1.3	IPR001509	NAD-dependent epimerase/dehydratase
C01F1.3	IPR003869	Polysaccharide biosynthesis protein CapD-like
C01F1.3	IPR013120	Male sterility, NAD-binding
C01F1.6	IPR002110	Ankyrin repeat
C01F1.6	IPR020683	Ankyrin repeat-containing domain
C01F4.2	IPR000198	RhoGAP
C01F6.6	IPR001478	PDZ/DHR/GLGF
C01F6.9	IPR007087	Zinc finger, C2H2-type
C01G10.10	IPR000905	Peptidase M22, glycoprotease
C01G10.10	IPR017861	Peptidase M22, glycoprotease, subgroup
C01G10.11	IPR011680	FEZ-like
C01G10.7	IPR005000	HpcH/HpaI aldolase
C01G10.7	IPR011206	Citrate lyase, beta subunit
C01G10.8	IPR013538	Activator of Hsp90 ATPase homologue 1-like
C01G10.8	IPR015310	Activator of Hsp90 ATPase, N-terminal
C01G10.9	IPR000649	Initiation factor 2B related
C01G10.9	IPR005251	Putative translation initiation factor, aIF-2BI/5-methylthioribose-1-phosphate isomerase
C01G10.9	IPR011559	Initiation factor 2B alpha/beta/delta
C01G12.5	IPR002198	Short-chain dehydrogenase/reductase SDR
C01G12.5	IPR020904	Short-chain dehydrogenase/reductase, conserved site
C01G12.8	IPR001757	ATPase, P-type, K/Mg/Cd/Cu/Zn/Na/Ca/Na/H-transporter
C01G12.8	IPR004014	ATPase, P-type cation-transporter, N-terminal
C01G12.8	IPR005775	ATPase, P-type cation exchange, alpha subunit, eukaryotic
C01G12.8	IPR005834	Haloacid dehalogenase-like hydrolase
C01G12.8	IPR006068	ATPase, P-type cation-transporter, C-terminal
C01G12.8	IPR008250	ATPase, P-type, ATPase-associated domain
C01G12.8	IPR018303	ATPase, P-type phosphorylation site
C01G5.2	IPR003100	Argonaute/Dicer protein, PAZ
C01G5.2	IPR003165	Stem cell self-renewal protein Piwi
C01G5.5	IPR001395	Aldo/keto reductase
C01G5.5	IPR018170	Aldo/keto reductase, conserved site
C01G5.6	IPR019103	Peptidase aspartic, eukaryotic predicted
C01G5.8	IPR014883	VRR-NUC
C01G6.1	IPR000425	Major intrinsic protein
C01G6.1	IPR012269	Aquaporin
C01G6.4	IPR001841	Zinc finger, RING-type
C01G6.4	IPR018957	Zinc finger, C3HC4 RING-type
C01G6.6	IPR001433	Oxidoreductase FAD/NAD(P)-binding
C01G6.6	IPR003097	FAD-binding, type 1
C01G6.6	IPR008254	Flavodoxin/nitric oxide synthase
C01G6.6	IPR017927	Ferredoxin reductase-type FAD-binding domain
C01G6.7	IPR000873	AMP-dependent synthetase/ligase
C01G6.7	IPR020845	AMP-binding, conserved site
C01G6.8	IPR000001	Kringle
C01G6.8	IPR000719	Protein kinase, catalytic domain
C01G6.8	IPR001245	Serine/threonine/tyrosine-protein kinase
C01G6.8	IPR002290	Serine/threonine-protein kinase domain
C01G6.8	IPR003598	Immunoglobulin subtype 2
C01G6.8	IPR003599	Immunoglobulin subtype
C01G6.8	IPR007110	Immunoglobulin-like
C01G6.8	IPR008266	Tyrosine-protein kinase, active site
C01G6.8	IPR013106	Immunoglobulin V-set
C01G6.8	IPR016247	Tyrosine-protein kinase, receptor ROR, subgroup
C01G6.8	IPR017441	Protein kinase, ATP binding site
C01G6.8	IPR017442	Serine/threonine-protein kinase-like domain
C01G6.8	IPR018056	Kringle, conserved site
C01G6.8	IPR018483	Carbohydrate kinase, FGGY, conserved site
C01G6.8	IPR020067	Frizzled-like domain
C01G6.8	IPR020635	Tyrosine-protein kinase, catalytic domain
C01G8.2	IPR003492	Batten's disease protein Cln3
C01G8.2	IPR018460	Batten's disease protein Cln3, subgroup
C01G8.3	IPR002198	Short-chain dehydrogenase/reductase SDR
C01G8.4	IPR001623	Heat shock protein DnaJ, N-terminal
C01G8.5	IPR000299	FERM domain
C01G8.5	IPR011174	Ezrin/radixin/moesin
C01G8.5	IPR011259	Ezrin/radixin/moesin, C-terminal
C01G8.5	IPR018979	FERM, N-terminal
C01G8.5	IPR018980	FERM, C-terminal PH-like domain
C01G8.5	IPR019747	FERM conserved site
C01G8.5	IPR019748	FERM central domain
C01G8.5	IPR019749	Band 4.1 domain
C01G8.9	IPR001606	ARID/BRIGHT DNA-binding domain
C01G8.9	IPR006031	XYPPX repeat
C01H6.1	IPR002486	Nematode cuticle collagen, N-terminal
C01H6.1	IPR008160	Collagen triple helix repeat
C01H6.2	IPR002110	Ankyrin repeat
C01H6.2	IPR020683	Ankyrin repeat-containing domain
C01H6.4	IPR001327	Pyridine nucleotide-disulphide oxidoreductase, NAD-binding region
C01H6.4	IPR003953	Fumarate reductase/succinate dehydrogenase flavoprotein, N-terminal
C01H6.4	IPR004792	HI0933-like protein
C01H6.4	IPR006076	FAD dependent oxidoreductase
C01H6.4	IPR013027	FAD-dependent pyridine nucleotide-disulphide oxidoreductase
C01H6.4	IPR020946	Flavin-containing monooxygenase-like
C01H6.5	IPR000536	Nuclear hormone receptor, ligand-binding, core
C01H6.5	IPR001628	Zinc finger, nuclear hormone receptor-type
C01H6.6	IPR000644	Cystathionine beta-synthase, core
C01H6.6	IPR002550	Protein of unknown function DUF21
C01H6.7	IPR001487	Bromodomain
C01H6.9	IPR000719	Protein kinase, catalytic domain
C01H6.9	IPR001245	Serine/threonine/tyrosine-protein kinase
C01H6.9	IPR017441	Protein kinase, ATP binding site
C01H6.9	IPR017442	Serine/threonine-protein kinase-like domain
C02A12.1	IPR004045	Glutathione S-transferase, N-terminal
C02A12.1	IPR004046	Glutathione S-transferase, C-terminal
C02A12.1	IPR017933	Glutathione S-transferase/chloride channel, C-terminal
C02B10.1	IPR006089	Acyl-CoA dehydrogenase, conserved site
C02B10.1	IPR006090	Acyl-CoA oxidase/dehydrogenase, type 1
C02B10.1	IPR006091	Acyl-CoA oxidase/dehydrogenase, central domain
C02B10.1	IPR006092	Acyl-CoA dehydrogenase, N-terminal
C02B10.1	IPR013107	Acyl-CoA dehydrogenase, type 2, C-terminal
C02B8.4	IPR001092	Helix-loop-helix DNA-binding domain
C02B8.6	IPR001841	Zinc finger, RING-type
C02B8.6	IPR004170	WWE domain
C02B8.6	IPR017907	Zinc finger, RING-type, conserved site
C02B8.6	IPR018123	WWE domain, subgroup
C02B8.6	IPR018957	Zinc finger, C3HC4 RING-type
C02C2.1	IPR002227	Tyrosinase
C02C2.1	IPR003582	Metridin-like ShK toxin
C02C2.5	IPR000415	Nitroreductase-like
C02C6.1	IPR000375	Dynamin central region
C02C6.1	IPR001401	Dynamin, GTPase domain
C02C6.1	IPR001849	Pleckstrin homology
C02C6.1	IPR003130	Dynamin GTPase effector
C02C6.1	IPR019762	Dynamin, GTPase region, conserved site
C02C6.3	IPR000483	Cysteine-rich flanking region, C-terminal domain
C02C6.3	IPR001611	Leucine-rich repeat
C02D4.2	IPR000276	7TM GPCR, rhodopsin-like
C02D4.2	IPR017452	GPCR, rhodopsin-like superfamily
C02D4.2	IPR019424	7TM GPCR, serpentine receptor class sx (Srsx)
C02D4.2	IPR019426	7TM GPCR, serpentine receptor class v (Srv), Nematode
C02D5.2	IPR004911	Gamma interferon inducible lysosomal thiol reductase GILT
C02D5.3	IPR004045	Glutathione S-transferase, N-terminal
C02D5.3	IPR004046	Glutathione S-transferase, C-terminal
C02D5.3	IPR017933	Glutathione S-transferase/chloride channel, C-terminal
C02E7.1	IPR001757	ATPase, P-type, K/Mg/Cd/Cu/Zn/Na/Ca/Na/H-transporter
C02E7.1	IPR004014	ATPase, P-type cation-transporter, N-terminal
C02E7.1	IPR005834	Haloacid dehalogenase-like hydrolase
C02E7.1	IPR006061	Bacterial extracellular solute-binding family 1, conserved site
C02E7.1	IPR006068	ATPase, P-type cation-transporter, C-terminal
C02E7.1	IPR008250	ATPase, P-type, ATPase-associated domain
C02E7.1	IPR018303	ATPase, P-type phosphorylation site
C02F12.4	IPR000219	Dbl homology (DH) domain
C02F12.4	IPR001849	Pleckstrin homology
C02F4.1	IPR001452	Src homology-3 domain
C02F4.2	IPR004843	Metallophosphoesterase
C02F4.2	IPR006186	Serine/threonine-specific protein phosphatase/bis(5-nucleosyl)-tetraphosphatase
C02F5.3	IPR002917	GTP-binding protein, HSR1-related
C02F5.3	IPR004095	TGS
C02F5.3	IPR005225	Small GTP-binding protein
C02F5.3	IPR006074	GTP1/OBG, conserved site
C02F5.4	IPR006569	RNA polymerase II, large subunit, CTD
C02F5.4	IPR006903	Protein of unknown function DUF618
C02F5.7	IPR001810	Cyclin-like F-box
C02F5.7	IPR006553	Leucine-rich repeat, cysteine-containing subtype
C02F5.9	IPR001353	Proteasome, subunit alpha/beta
C02F5.9	IPR016050	Proteasome, beta-type subunit, conserved site
C02G6.1	IPR001431	Peptidase M16, zinc-binding site
C02G6.1	IPR007863	Peptidase M16, C-terminal
C02G6.1	IPR011765	Peptidase M16, N-terminal
C02G6.2	IPR001431	Peptidase M16, zinc-binding site
C02G6.2	IPR007863	Peptidase M16, C-terminal
C02G6.2	IPR011765	Peptidase M16, N-terminal
C02H6.1	IPR002659	Glycosyl transferase, family 31
C02H7.1	IPR018799	Microtubule/TRAF3 and DISC1 binding protein
C02H7.3	IPR001194	DENN
C02H7.3	IPR002350	Proteinase inhibitor I1, Kazal
C02H7.3	IPR005112	dDENN
C02H7.3	IPR005113	uDENN
C03A3.2	IPR013057	Amino acid transporter, transmembrane
C03B8.4	IPR007087	Zinc finger, C2H2-type
C03B8.4	IPR015880	Zinc finger, C2H2-like
C03C10.1	IPR000719	Protein kinase, catalytic domain
C03C10.1	IPR001245	Serine/threonine/tyrosine-protein kinase
C03C10.1	IPR002290	Serine/threonine-protein kinase domain
C03C10.1	IPR008271	Serine/threonine-protein kinase, active site
C03C10.1	IPR017441	Protein kinase, ATP binding site
C03C10.1	IPR017442	Serine/threonine-protein kinase-like domain
C03C10.3	IPR000358	Ribonucleotide reductase
C03C10.4	IPR007940	SH3-binding 5
C03C11.2	IPR002087	Anti-proliferative protein
C03D6.3	IPR000340	Dual specificity phosphatase, catalytic domain
C03D6.3	IPR000387	Dual-specific/protein-tyrosine phosphatase, conserved region
C03D6.3	IPR001339	mRNA capping enzyme
C03D6.3	IPR012310	ATP dependent DNA ligase, central
C03D6.3	IPR013846	mRNA capping enzyme, C-terminal
C03D6.3	IPR016130	Protein-tyrosine phosphatase, active site
C03D6.3	IPR017074	mRNA capping enzyme, bifunctional
C03D6.5	IPR006818	Histone chaperone, ASF1-like
C03D6.5	IPR017282	Histone deposition protein Asf1
C03D6.8	IPR000988	Ribosomal protein L24e
C03D6.8	IPR011017	TRASH
C03E10.4	IPR007754	N-acetylglucosaminyltransferase II
C03E10.5	IPR001304	C-type lectin
C03E10.5	IPR008160	Collagen triple helix repeat
C03F11.1	IPR004178	Calmodulin-binding domain
C03F11.1	IPR011996	Potassium channel, calcium-activated, SK, conserved region
C03F11.1	IPR013099	Ion transport 2
C03F11.3	IPR002159	CD36 antigen
C03G5.1	IPR003952	Fumarate reductase/succinate dehydrogenase, FAD-binding site
C03G5.1	IPR003953	Fumarate reductase/succinate dehydrogenase flavoprotein, N-terminal
C03G5.1	IPR004112	Fumarate reductase/succinate dehydrogenase flavoprotein, C-terminal
C03G5.1	IPR006076	FAD dependent oxidoreductase
C03G5.1	IPR011281	Succinate dehydrogenase, flavoprotein subunit
C03G5.1	IPR014006	Succinate dehydrogenase/fumarate reductase, flavoprotein subunit
C03G6.14	IPR001128	Cytochrome P450
C03G6.14	IPR017972	Cytochrome P450, conserved site
C03G6.15	IPR001128	Cytochrome P450
C03G6.15	IPR017972	Cytochrome P450, conserved site
C03G6.19	IPR000215	Protease inhibitor I4, serpin
C03H5.1	IPR000859	CUB
C03H5.1	IPR001304	C-type lectin
C03H5.1	IPR018378	C-type lectin, conserved site
C03H5.1	IPR022272	Lipocalin conserved site
C03H5.2	IPR000620	Protein of unknown function DUF6, transmembrane
C03H5.2	IPR004689	UDP-galactose transporter
C03H5.2	IPR007271	Nucleotide-sugar transporter
C03H5.2	IPR021189	UDP/CMP-sugar transporter
C03H5.4	IPR001211	Phospholipase A2, eukaryotic
C03H5.4	IPR013090	Phospholipase A2, active site
C04A11.3	IPR000719	Protein kinase, catalytic domain
C04A11.3	IPR001245	Serine/threonine/tyrosine-protein kinase
C04A11.3	IPR002290	Serine/threonine-protein kinase domain
C04A11.3	IPR008271	Serine/threonine-protein kinase, active site
C04A11.3	IPR017442	Serine/threonine-protein kinase-like domain
C04A11.3	IPR020635	Tyrosine-protein kinase, catalytic domain
C04A11.4	IPR000742	EGF-like, type 3
C04A11.4	IPR001590	Peptidase M12B, ADAM/reprolysin
C04A11.4	IPR001762	Blood coagulation inhibitor, Disintegrin
C04A11.4	IPR006586	ADAM, cysteine-rich
C04A11.4	IPR013032	EGF-like region, conserved site
C04A2.1	IPR000195	RabGAP/TBC
C04A2.3	IPR000679	Zinc finger, GATA-type
C04A2.3	IPR000949	ELM2
C04A2.3	IPR001005	SANT, DNA-binding
C04A2.3	IPR001025	Bromo adjacent homology (BAH) domain
C04A2.3	IPR014778	Myb, DNA-binding
C04A2.3	IPR017884	SANT, eukarya
C04A2.7	IPR001623	Heat shock protein DnaJ, N-terminal
C04C3.2	IPR006029	Neurotransmitter-gated ion-channel transmembrane domain
C04C3.2	IPR006202	Neurotransmitter-gated ion-channel ligand-binding
C04C3.2	IPR018000	Neurotransmitter-gated ion-channel, conserved site
C04C3.3	IPR005475	Transketolase-like, pyrimidine-binding domain
C04C3.3	IPR005476	Transketolase, C-terminal
C04C3.5	IPR019366	Clusterin-associated protein-1
C04D8.1	IPR000198	RhoGAP
C04D8.1	IPR001849	Pleckstrin homology
C04E12.11	IPR011021	Arrestin-like, N-terminal
C04E12.12	IPR011021	Arrestin-like, N-terminal
C04E12.12	IPR011022	Arrestin-like, C-terminal
C04E12.7	IPR005552	Scramblase
C04F1.3	IPR001356	Homeobox
C04F1.3	IPR001781	Zinc finger, LIM-type
C04F1.3	IPR017970	Homeobox, conserved site
C04F12.10	IPR001915	Peptidase M48
C04F12.3	IPR000488	Death
C04F12.3	IPR002110	Ankyrin repeat
C04F12.3	IPR020683	Ankyrin repeat-containing domain
C04F12.4	IPR002784	Ribosomal protein L14
C04F12.8	IPR000340	Dual specificity phosphatase, catalytic domain
C04F12.8	IPR000387	Dual-specific/protein-tyrosine phosphatase, conserved region
C04F12.8	IPR016130	Protein-tyrosine phosphatase, active site
C04F12.8	IPR020422	Dual specificity phosphatase, subgroup, catalytic domain
C04F12.9	IPR002156	Ribonuclease H
C04F5.1	IPR000215	Protease inhibitor I4, serpin
C04F6.3	IPR001223	Glycoside hydrolase, family 18, catalytic domain
C04F6.3	IPR001579	Glycoside hydrolase, chitinase active site
C04F6.3	IPR002557	Chitin binding protein, peritrophin-A
C04F6.3	IPR011583	Chitinase II
C04F6.4	IPR001680	WD40 repeat
C04F6.4	IPR017986	WD40-repeat-containing domain
C04F6.4	IPR019775	WD40 repeat, conserved site
C04F6.4	IPR019781	WD40 repeat, subgroup
C04F6.4	IPR019782	WD40 repeat 2
C04G2.6	IPR001900	Ribonuclease II/R
C04G2.6	IPR006058	2Fe-2S ferredoxin, iron-sulphur binding site
C04G2.6	IPR006596	Nucleotide binding protein, PINc
C04G2.6	IPR013223	Ribonuclease B, N-terminal OB domain
C04G2.6	IPR017970	Homeobox, conserved site
C04G2.7	IPR001523	Paired box protein, N-terminal
C04G6.1	IPR000719	Protein kinase, catalytic domain
C04G6.1	IPR001245	Serine/threonine/tyrosine-protein kinase
C04G6.1	IPR002290	Serine/threonine-protein kinase domain
C04G6.1	IPR003527	MAP kinase, conserved site
C04G6.1	IPR008271	Serine/threonine-protein kinase, active site
C04G6.1	IPR017441	Protein kinase, ATP binding site
C04G6.1	IPR017442	Serine/threonine-protein kinase-like domain
C04G6.1	IPR020635	Tyrosine-protein kinase, catalytic domain
C04G6.10	IPR006081	Alpha defensin
C04G6.3	IPR001683	Phox-like
C04G6.3	IPR001736	Phospholipase D/Transphosphatidylase
C04G6.3	IPR001849	Pleckstrin homology
C04G6.3	IPR016555	Phospholipase D, eukaryota
C04G6.7	IPR006081	Alpha defensin
C04H5.1	IPR005651	Protein of unknown function DUF343
C04H5.6	IPR001650	DNA/RNA helicase, C-terminal
C04H5.6	IPR002464	DNA/RNA helicase, ATP-dependent, DEAH-box type, conserved site
C04H5.6	IPR007502	Helicase-associated domain
C04H5.6	IPR011709	Domain of unknown function DUF1605
C04H5.6	IPR014001	DEAD-like helicase, N-terminal
C04H5.6	IPR014021	Helicase, superfamily 1/2, ATP-binding domain
C05A2.1	IPR004843	Metallophosphoesterase
C05A2.1	IPR006186	Serine/threonine-specific protein phosphatase/bis(5-nucleosyl)-tetraphosphatase
C05A9.1	IPR001140	ABC transporter, transmembrane domain
C05A9.1	IPR003439	ABC transporter-like
C05A9.1	IPR003593	ATPase, AAA+ type, core
C05A9.1	IPR017871	ABC transporter, conserved site
C05A9.1	IPR017940	ABC transporter integral membrane type 1
C05B10.1	IPR000340	Dual specificity phosphatase, catalytic domain
C05B10.1	IPR000387	Dual-specific/protein-tyrosine phosphatase, conserved region
C05B10.1	IPR020422	Dual specificity phosphatase, subgroup, catalytic domain
C05B5.7	IPR000342	Regulator of G protein signalling
C05C10.1	IPR000560	Histidine phosphatase superfamily, clade-2
C05C10.3	IPR004163	Coenzyme A transferase binding site
C05C10.3	IPR004164	Coenzyme A transferase active site
C05C10.3	IPR004165	Coenzyme A transferase
C05C10.3	IPR012791	3-oxoacid CoA-transferase, subunit B
C05C10.3	IPR012792	3-oxoacid CoA-transferase, subunit A
C05C10.3	IPR014388	3-oxoacid CoA-transferase
C05C10.4	IPR000560	Histidine phosphatase superfamily, clade-2
C05C10.6	IPR001680	WD40 repeat
C05C10.6	IPR013535	PUL
C05C10.6	IPR015155	PLAA family ubiquitin binding, PFU
C05C10.6	IPR017986	WD40-repeat-containing domain
C05C10.6	IPR019781	WD40 repeat, subgroup
C05C10.6	IPR019782	WD40 repeat 2
C05C12.3	IPR005821	Ion transport
C05C8.1	IPR006553	Leucine-rich repeat, cysteine-containing subtype
C05C8.3	IPR001179	Peptidyl-prolyl cis-trans isomerase, FKBP-type
C05C8.5	IPR006055	Exonuclease
C05C8.5	IPR013520	Exonuclease, RNase T/DNA polymerase III
C05C8.6	IPR000210	BTB/POZ-like
C05C8.6	IPR011705	BTB/Kelch-associated
C05C8.6	IPR013069	BTB/POZ
C05C8.7	IPR001250	Mannose-6-phosphate isomerase, type I
C05C8.7	IPR016305	Mannose-6-phosphate isomerase
C05C8.7	IPR018050	Phosphomannose isomerase, type I, conserved site
C05D10.2	IPR000719	Protein kinase, catalytic domain
C05D10.2	IPR001245	Serine/threonine/tyrosine-protein kinase
C05D10.2	IPR002290	Serine/threonine-protein kinase domain
C05D10.2	IPR003527	MAP kinase, conserved site
C05D10.2	IPR008271	Serine/threonine-protein kinase, active site
C05D10.2	IPR017441	Protein kinase, ATP binding site
C05D10.2	IPR017442	Serine/threonine-protein kinase-like domain
C05D10.2	IPR020635	Tyrosine-protein kinase, catalytic domain
C05D10.3	IPR003439	ABC transporter-like
C05D10.3	IPR003593	ATPase, AAA+ type, core
C05D10.3	IPR005284	Pigment precursor permease
C05D10.3	IPR013525	ABC-2 type transporter
C05D11.11	IPR001085	Serine hydroxymethyltransferase
C05D11.11	IPR019798	Serine hydroxymethyltransferase, pyridoxal phosphate binding site
C05D11.12	IPR002938	Monooxygenase, FAD-binding
C05D11.12	IPR003953	Fumarate reductase/succinate dehydrogenase flavoprotein, N-terminal
C05D11.12	IPR004792	HI0933-like protein
C05D11.12	IPR006076	FAD dependent oxidoreductase
C05D11.12	IPR007859	Electron transfer flavoprotein-ubiquinone oxidoreductase
C05D11.12	IPR008671	Lycopene beta/epsilon cyclase
C05D11.12	IPR013027	FAD-dependent pyridine nucleotide-disulphide oxidoreductase
C05D11.12	IPR017896	4Fe-4S ferredoxin, iron-sulpur binding domain
C05D11.2	IPR006925	Vps16, C-terminal
C05D11.2	IPR006926	Vps16, N-terminal
C05D11.2	IPR016534	Vacuolar protein sorting-associated protein 16
C05D11.4	IPR002348	Interleukin 1/heparin-binding growth factor
C05D11.5	IPR012307	Xylose isomerase, TIM barrel domain
C05D11.6	IPR001506	Peptidase M12A, astacin
C05D11.6	IPR006026	Peptidase, metallopeptidase
C05D11.7	IPR002641	Patatin
C05D11.8	IPR019384	Retinoic acid induced 16-like protein
C05D11.9	IPR009723	Ribonuclease P/MRP, subunit POP1
C05D11.9	IPR012590	POPLD
C05D11.9	IPR018062	Helix-turn-helix, AraC type, subdomain 2
C05D12.1	IPR003006	Immunoglobulin/major histocompatibility complex, conserved site
C05D12.1	IPR005018	DOMON related
C05D12.1	IPR006593	Cytochrome b561/ferric reductase transmembrane
C05D2.1	IPR000719	Protein kinase, catalytic domain
C05D2.1	IPR001245	Serine/threonine/tyrosine-protein kinase
C05D2.1	IPR002290	Serine/threonine-protein kinase domain
C05D2.1	IPR008271	Serine/threonine-protein kinase, active site
C05D2.1	IPR017442	Serine/threonine-protein kinase-like domain
C05D2.1	IPR020635	Tyrosine-protein kinase, catalytic domain
C05D2.10	IPR001680	WD40 repeat
C05D2.10	IPR017986	WD40-repeat-containing domain
C05D2.10	IPR019775	WD40 repeat, conserved site
C05D2.10	IPR019781	WD40 repeat, subgroup
C05D2.10	IPR019782	WD40 repeat 2
C05D9.1	IPR001683	Phox-like
C05D9.2	IPR002000	Lysosome-associated membrane glycoprotein (Lamp)/CD68
C05D9.3	IPR013032	EGF-like region, conserved site
C05D9.3	IPR015812	Integrin beta subunit
C05D9.5	IPR001040	Eukaryotic translation initiation factor 4E (eIF-4E)
C05D9.5	IPR019770	Eukaryotic translation initiation factor 4E (eIF-4E), conserved site
C05E11.1	IPR019273	Protein of unknown function DUF2296
C05E4.1	IPR000215	Protease inhibitor I4, serpin
C05E4.3	IPR000215	Protease inhibitor I4, serpin
C05G5.1	IPR011701	Major facilitator superfamily MFS-1
C05G5.4	IPR003781	CoA-binding
C05G5.4	IPR005810	Succinyl-CoA ligase, alpha subunit
C05G5.4	IPR005811	ATP-citrate lyase/succinyl-CoA ligase
C05G5.4	IPR017440	ATP-citrate lyase/succinyl-CoA ligase, active site
C05H8.1	IPR000719	Protein kinase, catalytic domain
C05H8.1	IPR001245	Serine/threonine/tyrosine-protein kinase
C05H8.1	IPR002290	Serine/threonine-protein kinase domain
C05H8.1	IPR008271	Serine/threonine-protein kinase, active site
C05H8.1	IPR017441	Protein kinase, ATP binding site
C05H8.1	IPR017442	Serine/threonine-protein kinase-like domain
C05H8.1	IPR020635	Tyrosine-protein kinase, catalytic domain
C06A1.1	IPR000523	Magnesium chelatase, ChlI subunit
C06A1.1	IPR003338	ATPase, AAA-type, VAT, N-terminal
C06A1.1	IPR003593	ATPase, AAA+ type, core
C06A1.1	IPR003959	ATPase, AAA-type, core
C06A1.1	IPR003960	ATPase, AAA-type, conserved site
C06A1.1	IPR004201	Cell division protein 48, CDC48, domain 2
C06A1.1	IPR005938	ATPase, AAA-type, CDC48
C06A1.1	IPR011703	ATPase, AAA-3
C06A1.5	IPR006110	RNA polymerase Rpb6
C06A1.5	IPR018247	EF-Hand 1, calcium-binding site
C06A1.5	IPR020708	DNA-directed RNA polymerase, 14-18kDa subunit, conserved site
C06A1.6	IPR004035	Endonuclease III, iron-sulphur binding site
C06A1.7	IPR004035	Endonuclease III, iron-sulphur binding site
C06A12.3	IPR007967	Protein of unknown function DUF727
C06A5.11	IPR003000	NAD-dependent histone deacetylase, silent information regulator Sir2
C06A5.3	IPR000313	PWWP
C06A5.7	IPR004934	Tropomodulin
C06A6.3	IPR018798	FAM125
C06A6.4	IPR001261	ArgE/DapE/ACY1/CPG2/YscS, conserved site
C06A6.4	IPR002933	Peptidase M20
C06A6.4	IPR010159	N-acyl-L-amino-acid amidohydrolase
C06A6.4	IPR011650	Peptidase M20, dimerisation
C06A6.5	IPR013766	Thioredoxin domain
C06A6.5	IPR017936	Thioredoxin-like
C06A8.1	IPR003171	Methylenetetrahydrofolate reductase
C06A8.1	IPR004621	Eukaryotic-type methylenetetrahydrofolate reductase
C06A8.6	IPR000875	Cecropin
C06A8.6	IPR001611	Leucine-rich repeat
C06A8.6	IPR003591	Leucine-rich repeat, typical subtype
C06A8.6	IPR003603	U2A'/phosphoprotein 32 family A, C-terminal
C06A8.9	IPR001320	Ionotropic glutamate receptor
C06A8.9	IPR001638	Extracellular solute-binding protein, family 3
C06A8.9	IPR001828	Extracellular ligand-binding receptor
C06A8.9	IPR019594	Glutamate receptor, L-glutamate/glycine-binding
C06B3.3	IPR001128	Cytochrome P450
C06B3.3	IPR017972	Cytochrome P450, conserved site
C06B3.4	IPR002198	Short-chain dehydrogenase/reductase SDR
C06B3.4	IPR020904	Short-chain dehydrogenase/reductase, conserved site
C06B3.5	IPR002198	Short-chain dehydrogenase/reductase SDR
C06B3.5	IPR020904	Short-chain dehydrogenase/reductase, conserved site
C06B3.8	IPR001054	Adenylyl cyclase class-3/4/guanylyl cyclase
C06B3.8	IPR011644	Haem NO binding
C06B3.8	IPR018297	Adenylyl cyclase class-3/4/guanylyl cyclase, conserved site
C06B8.8	IPR002675	Ribosomal protein L38e
C06C3.1	IPR000484	Photosynthetic reaction centre, L/M
C06C3.1	IPR002110	Ankyrin repeat
C06C3.1	IPR020683	Ankyrin repeat-containing domain
C06E1.10	IPR001650	DNA/RNA helicase, C-terminal
C06E1.10	IPR002464	DNA/RNA helicase, ATP-dependent, DEAH-box type, conserved site
C06E1.10	IPR007502	Helicase-associated domain
C06E1.10	IPR011709	Domain of unknown function DUF1605
C06E1.10	IPR014001	DEAD-like helicase, N-terminal
C06E1.10	IPR014021	Helicase, superfamily 1/2, ATP-binding domain
C06E1.3	IPR018469	Dual oxidase maturation factor
C06E1.4	IPR001320	Ionotropic glutamate receptor
C06E1.4	IPR001638	Extracellular solute-binding protein, family 3
C06E1.4	IPR019594	Glutamate receptor, L-glutamate/glycine-binding
C06E2.3	IPR000608	Ubiquitin-conjugating enzyme, E2
C06E2.3	IPR015940	Ubiquitin-associated/translation elongation factor EF1B, N-terminal, eukaryote
C06E2.7	IPR000449	Ubiquitin-associated/translation elongation factor EF1B, N-terminal
C06E2.7	IPR000608	Ubiquitin-conjugating enzyme, E2
C06E2.7	IPR015940	Ubiquitin-associated/translation elongation factor EF1B, N-terminal, eukaryote
C06E4.3	IPR002198	Short-chain dehydrogenase/reductase SDR
C06E4.6	IPR002198	Short-chain dehydrogenase/reductase SDR
C06E4.6	IPR020904	Short-chain dehydrogenase/reductase, conserved site
C06E7.1	IPR002133	S-adenosylmethionine synthetase
C06E7.3	IPR002133	S-adenosylmethionine synthetase
C06G1.5	IPR018247	EF-Hand 1, calcium-binding site
C06G1.5	IPR018249	EF-HAND 2
C06G3.10	IPR009316	COG complex component, COG2
C06G3.11	IPR004217	Mitochondrial inner membrane translocase complex, Tim8/9/10/13-zinc finger-like
C06G3.2	IPR001752	Kinesin, motor domain
C06G3.5	IPR001365	Adenosine/AMP deaminase
C06G3.5	IPR006330	Adenosine deaminase
C06G3.7	IPR001327	Pyridine nucleotide-disulphide oxidoreductase, NAD-binding region
C06G3.7	IPR002218	Glucose-inhibited division protein A-related
C06G3.7	IPR003953	Fumarate reductase/succinate dehydrogenase flavoprotein, N-terminal
C06G3.7	IPR004099	Pyridine nucleotide-disulphide oxidoreductase, dimerisation
C06G3.7	IPR006076	FAD dependent oxidoreductase
C06G3.7	IPR006338	Thioredoxin/glutathione reductase selenoprotein
C06G3.7	IPR012999	Pyridine nucleotide-disulphide oxidoreductase, class I, active site
C06G3.7	IPR013027	FAD-dependent pyridine nucleotide-disulphide oxidoreductase
C06G3.8	IPR004365	Nucleic acid binding, OB-fold, tRNA/helicase-type
C06G3.9	IPR018611	Protein of unknown function DUF2042
C06G4.2	IPR000169	Peptidase, cysteine peptidase active site
C06G4.2	IPR001300	Peptidase C2, calpain
C06G4.5	IPR000276	7TM GPCR, rhodopsin-like
C06G4.5	IPR017452	GPCR, rhodopsin-like superfamily
C06G8.1	IPR018169	MtN3/saliva-related transmembrane protein, conserved region
C06G8.2	IPR000109	Oligopeptide transporter
C06G8.2	IPR004768	Oligopeptide transporter, peptide:H+ symporter
C06G8.2	IPR018456	PTR2 family proton/oligopeptide symporter, conserved site
C06G8.3	IPR003689	Zinc/iron permease
C06H2.2	IPR002913	Lipid-binding START
C06H2.3	IPR000182	GCN5-related N-acetyltransferase
C06H2.3	IPR003347	Transcription factor jumonji/aspartyl beta-hydroxylase
C06H2.3	IPR013129	Transcription factor jumonji
C06H2.4	IPR002666	Reduced folate carrier
C07A12.3	IPR000536	Nuclear hormone receptor, ligand-binding, core
C07A12.3	IPR001628	Zinc finger, nuclear hormone receptor-type
C07A12.3	IPR016355	Orphan nuclear receptor Fushi-tarazu factor 1
C07A12.4	IPR005788	Disulphide isomerase
C07A12.4	IPR005792	Protein disulphide isomerase
C07A12.4	IPR013766	Thioredoxin domain
C07A12.4	IPR017936	Thioredoxin-like
C07A12.4	IPR017937	Thioredoxin, conserved site
C07A12.7	IPR002014	VHS
C07A12.7	IPR004152	GAT
C07A12.7	IPR014645	Target of Myb protein 1
C07A12.7	IPR018205	VHS subgroup
C07A4.1	IPR000504	RNA recognition motif, RNP-1
C07A4.1	IPR003954	RNA recognition, domain 1
C07A4.3	IPR001283	Allergen V5/Tpx-1 related
C07A4.3	IPR014044	SCP-like extracellular
C07A4.3	IPR018244	Allergen V5/Tpx-1 related, conserved site
C07A9.11	IPR004837	Sodium/calcium exchanger membrane region
C07A9.2	IPR001748	G10 protein
C07A9.2	IPR018230	BUD31/G10-related, conserved site
C07A9.3	IPR000719	Protein kinase, catalytic domain
C07A9.3	IPR001245	Serine/threonine/tyrosine-protein kinase
C07A9.3	IPR002290	Serine/threonine-protein kinase domain
C07A9.3	IPR008271	Serine/threonine-protein kinase, active site
C07A9.3	IPR017441	Protein kinase, ATP binding site
C07A9.3	IPR017442	Serine/threonine-protein kinase-like domain
C07A9.3	IPR020635	Tyrosine-protein kinase, catalytic domain
C07A9.4	IPR004837	Sodium/calcium exchanger membrane region
C07A9.8	IPR021134	Bestrophin-like
C07B5.4	IPR001849	Pleckstrin homology
C07B5.5	IPR004947	Deoxyribonuclease II
C07D10.2	IPR000210	BTB/POZ-like
C07D10.2	IPR002083	MATH
C07D10.2	IPR013069	BTB/POZ
C07D10.4	IPR001506	Peptidase M12A, astacin
C07D10.4	IPR003582	Metridin-like ShK toxin
C07D10.4	IPR006026	Peptidase, metallopeptidase
C07D10.4	IPR017367	Peptidase M12A, nematode astacin 7/8
C07D8.5	IPR001395	Aldo/keto reductase
C07D8.6	IPR001395	Aldo/keto reductase
C07D8.6	IPR018170	Aldo/keto reductase, conserved site
C07E3.1	IPR000467	D111/G-patch
C07E3.2	IPR005343	Uncharacterised protein family UPF0120
C07E3.9	IPR001211	Phospholipase A2, eukaryotic
C07E3.9	IPR013090	Phospholipase A2, active site
C07F11.1	IPR000157	Toll-Interleukin receptor
C07F11.1	IPR001611	Leucine-rich repeat
C07F11.1	IPR003591	Leucine-rich repeat, typical subtype
C07G1.1	IPR001254	Peptidase S1/S6, chymotrypsin/Hap
C07G1.1	IPR018114	Peptidase S1/S6, chymotrypsin/Hap, active site
C07G1.3	IPR000719	Protein kinase, catalytic domain
C07G1.3	IPR001245	Serine/threonine/tyrosine-protein kinase
C07G1.3	IPR002290	Serine/threonine-protein kinase domain
C07G1.3	IPR008271	Serine/threonine-protein kinase, active site
C07G1.3	IPR017441	Protein kinase, ATP binding site
C07G1.3	IPR017442	Serine/threonine-protein kinase-like domain
C07G1.3	IPR020635	Tyrosine-protein kinase, catalytic domain
C07G1.4	IPR000095	PAK-box/P21-Rho-binding
C07G1.4	IPR000697	EVH1
C07G1.4	IPR003124	Actin-binding WH2
C07G1.5	IPR000306	Zinc finger, FYVE-type
C07G1.5	IPR002014	VHS
C07G1.5	IPR003903	Ubiquitin interacting motif
C07G1.5	IPR017073	Ubiquitin binding protein, Hrs/VPS27
C07G1.5	IPR017455	Zinc finger, FYVE-related
C07G1.5	IPR018205	VHS subgroup
C07G1.8	IPR002109	Glutaredoxin
C07G2.2	IPR004827	Basic-leucine zipper (bZIP) transcription factor
C07G2.2	IPR011700	Basic leucine zipper
C07G2.3	IPR002194	Chaperonin TCP-1, conserved site
C07G2.3	IPR002423	Chaperonin Cpn60/TCP-1
C07G2.3	IPR012718	T-complex protein 1, epsilon subunit
C07H4.2	IPR000644	Cystathionine beta-synthase, core
C07H4.2	IPR001807	Chloride channel, voltage gated
C07H6.1	IPR001357	BRCT
C07H6.1	IPR012310	ATP dependent DNA ligase, central
C07H6.2	IPR011107	Protein phosphatase inhibitor
C07H6.3	IPR000357	HEAT
C07H6.3	IPR021133	HEAT, type 2
C07H6.4	IPR000061	SWAP/Surp
C07H6.4	IPR000504	RNA recognition motif, RNP-1
C07H6.4	IPR006569	RNA polymerase II, large subunit, CTD
C07H6.5	IPR000629	RNA helicase, ATP-dependent, DEAD-box, conserved site
C07H6.5	IPR001650	DNA/RNA helicase, C-terminal
C07H6.5	IPR011545	DNA/RNA helicase, DEAD/DEAH box type, N-terminal
C07H6.5	IPR014001	DEAD-like helicase, N-terminal
C07H6.5	IPR014014	RNA helicase, DEAD-box type, Q motif
C07H6.5	IPR014021	Helicase, superfamily 1/2, ATP-binding domain
C07H6.6	IPR019337	Telomere length regulation protein
C07H6.7	IPR001356	Homeobox
C07H6.7	IPR001827	Homeobox protein, antennapedia type, conserved site
C07H6.7	IPR017970	Homeobox, conserved site
C08A9.1	IPR001189	Manganese/iron superoxide dismutase
C08A9.1	IPR019831	Manganese/iron superoxide dismutase, N-terminal
C08A9.1	IPR019832	Manganese/iron superoxide dismutase, C-terminal
C08A9.1	IPR019833	Manganese/iron superoxide dismutase, binding site
C08B11.3	IPR001606	ARID/BRIGHT DNA-binding domain
C08B11.3	IPR007087	Zinc finger, C2H2-type
C08B11.5	IPR000504	RNA recognition motif, RNP-1
C08B11.6	IPR004000	Actin/actin-like
C08B11.7	IPR001578	Peptidase C12, ubiquitin carboxyl-terminal hydrolase 1
C08B11.7	IPR017390	Ubiquitinyl hydrolase, UCH37 type
C08B11.8	IPR004856	Glycosyltransferase, ALG6/ALG8
C08B6.1	IPR002213	UDP-glucuronosyl/UDP-glucosyltransferase
C08B6.1	IPR007235	Glycosyl transferase, family 28, C-terminal
C08B6.14	IPR004843	Metallophosphoesterase
C08B6.7	IPR001680	WD40 repeat
C08B6.7	IPR017986	WD40-repeat-containing domain
C08B6.7	IPR019775	WD40 repeat, conserved site
C08B6.7	IPR019781	WD40 repeat, subgroup
C08B6.7	IPR019782	WD40 repeat 2
C08B6.8	IPR006055	Exonuclease
C08B6.8	IPR013520	Exonuclease, RNase T/DNA polymerase III
C08B6.9	IPR000594	UBA/THIF-type NAD/FAD binding fold
C08C3.3	IPR001356	Homeobox
C08C3.3	IPR001827	Homeobox protein, antennapedia type, conserved site
C08C3.3	IPR017970	Homeobox, conserved site
C08D8.1	IPR011701	Major facilitator superfamily MFS-1
C08D8.2	IPR004934	Tropomodulin
C08E8.2	IPR018119	Strictosidine synthase, conserved region
C08F11.8	IPR002213	UDP-glucuronosyl/UDP-glucosyltransferase
C08F8.1	IPR002777	Prefoldin beta-like
C08F8.2	IPR001650	DNA/RNA helicase, C-terminal
C08F8.2	IPR014001	DEAD-like helicase, N-terminal
C08F8.4	IPR004299	Membrane bound O-acyl transferase, MBOAT
C08F8.6	IPR000719	Protein kinase, catalytic domain
C08F8.6	IPR001245	Serine/threonine/tyrosine-protein kinase
C08F8.6	IPR002290	Serine/threonine-protein kinase domain
C08F8.6	IPR008271	Serine/threonine-protein kinase, active site
C08F8.6	IPR017441	Protein kinase, ATP binding site
C08F8.6	IPR017442	Serine/threonine-protein kinase-like domain
C08F8.7	IPR002041	Ran GTPase
C08F8.7	IPR003577	Ras small GTPase, Ras type
C08F8.7	IPR003578	Small GTPase, Rho type
C08F8.7	IPR003579	Ras small GTPase, Rab type
C08F8.7	IPR005225	Small GTP-binding protein
C08F8.7	IPR013684	MIRO-like
C08F8.7	IPR013753	Ras
C08F8.8	IPR001628	Zinc finger, nuclear hormone receptor-type
C08G5.4	IPR000008	C2 calcium-dependent membrane targeting
C08G5.4	IPR018029	C2 membrane targeting protein
C08H9.1	IPR001563	Peptidase S10, serine carboxypeptidase
C08H9.1	IPR018202	Peptidase S10, serine carboxypeptidase, active site
C08H9.16	IPR019129	Folate-sensitive fragile site protein Fra10Ac1
C08H9.2	IPR004087	K Homology
C08H9.2	IPR004088	K Homology, type 1
C08H9.2	IPR018111	K Homology, type 1, subgroup
C08H9.3	IPR004856	Glycosyltransferase, ALG6/ALG8
C08H9.3	IPR007581	Endonuclease V
C08H9.3	IPR021173	Bifunctional dolichyl-P-Glc:Glc1Man9GlcNAc2-PP-dolichyl glucosyltransferase/endonuclease V
C08H9.5	IPR000719	Protein kinase, catalytic domain
C08H9.5	IPR001245	Serine/threonine/tyrosine-protein kinase
C08H9.5	IPR002290	Serine/threonine-protein kinase domain
C08H9.5	IPR008266	Tyrosine-protein kinase, active site
C08H9.5	IPR017441	Protein kinase, ATP binding site
C08H9.5	IPR017442	Serine/threonine-protein kinase-like domain
C08H9.5	IPR020635	Tyrosine-protein kinase, catalytic domain
C09B7.1	IPR000276	7TM GPCR, rhodopsin-like
C09B7.1	IPR017452	GPCR, rhodopsin-like superfamily
C09B7.1	IPR019424	7TM GPCR, serpentine receptor class sx (Srsx)
C09B8.1	IPR000300	Inositol polyphosphate related phosphatase
C09B8.1	IPR005135	Endonuclease/exonuclease/phosphatase
C09B8.4	IPR008547	Protein of unknown function DUF829, transmembrane 53
C09B8.6	IPR002068	Heat shock protein Hsp20
C09B8.7	IPR000095	PAK-box/P21-Rho-binding
C09B8.7	IPR000719	Protein kinase, catalytic domain
C09B8.7	IPR001245	Serine/threonine/tyrosine-protein kinase
C09B8.7	IPR002290	Serine/threonine-protein kinase domain
C09B8.7	IPR008271	Serine/threonine-protein kinase, active site
C09B8.7	IPR017441	Protein kinase, ATP binding site
C09B8.7	IPR017442	Serine/threonine-protein kinase-like domain
C09B8.7	IPR020635	Tyrosine-protein kinase, catalytic domain
C09B9.3	IPR021134	Bestrophin-like
C09D1.1	IPR000219	Dbl homology (DH) domain
C09D1.1	IPR000719	Protein kinase, catalytic domain
C09D1.1	IPR001245	Serine/threonine/tyrosine-protein kinase
C09D1.1	IPR001452	Src homology-3 domain
C09D1.1	IPR001849	Pleckstrin homology
C09D1.1	IPR002290	Serine/threonine-protein kinase domain
C09D1.1	IPR003596	Immunoglobulin V-set, subgroup
C09D1.1	IPR003598	Immunoglobulin subtype 2
C09D1.1	IPR003599	Immunoglobulin subtype
C09D1.1	IPR003961	Fibronectin, type III
C09D1.1	IPR007110	Immunoglobulin-like
C09D1.1	IPR007850	RCSD
C09D1.1	IPR011511	Variant SH3
C09D1.1	IPR013106	Immunoglobulin V-set
C09D1.1	IPR017442	Serine/threonine-protein kinase-like domain
C09D1.1	IPR018483	Carbohydrate kinase, FGGY, conserved site
C09D1.1	IPR020635	Tyrosine-protein kinase, catalytic domain
C09D4.1	IPR011701	Major facilitator superfamily MFS-1
C09D4.5	IPR000196	Ribosomal protein L19/L19e
C09D8.1	IPR000242	Protein-tyrosine phosphatase, receptor/non-receptor type
C09D8.1	IPR000387	Dual-specific/protein-tyrosine phosphatase, conserved region
C09D8.1	IPR003595	Protein-tyrosine phosphatase, catalytic
C09D8.1	IPR003598	Immunoglobulin subtype 2
C09D8.1	IPR003599	Immunoglobulin subtype
C09D8.1	IPR003961	Fibronectin, type III
C09D8.1	IPR007110	Immunoglobulin-like
C09D8.1	IPR013106	Immunoglobulin V-set
C09D8.1	IPR016130	Protein-tyrosine phosphatase, active site
C09E10.2	IPR000159	Ras-association
C09E10.2	IPR000756	Diacylglycerol kinase, accessory domain
C09E10.2	IPR001206	Diacylglycerol kinase, catalytic domain
C09E10.2	IPR001965	Zinc finger, PHD-type
C09E10.2	IPR002219	Protein kinase C-like, phorbol ester/diacylglycerol binding
C09E10.2	IPR019787	Zinc finger, PHD-finger
C09E7.5	IPR001841	Zinc finger, RING-type
C09E7.5	IPR018957	Zinc finger, C3HC4 RING-type
C09E7.8	IPR001841	Zinc finger, RING-type
C09E7.8	IPR018957	Zinc finger, C3HC4 RING-type
C09E7.9	IPR001841	Zinc finger, RING-type
C09E7.9	IPR018957	Zinc finger, C3HC4 RING-type
C09F5.2	IPR012446	Protein of unknown function DUF1650
C09F5.3	IPR007087	Zinc finger, C2H2-type
C09F5.3	IPR015880	Zinc finger, C2H2-like
C09F9.3	IPR002110	Ankyrin repeat
C09F9.3	IPR015868	Glutaminase, core
C09F9.3	IPR020683	Ankyrin repeat-containing domain
C09G12.1	IPR001356	Homeobox
C09G12.8	IPR002041	Ran GTPase
C09G12.8	IPR003577	Ras small GTPase, Ras type
C09G12.8	IPR003578	Small GTPase, Rho type
C09G12.8	IPR003579	Ras small GTPase, Rab type
C09G12.8	IPR005225	Small GTP-binding protein
C09G12.8	IPR013684	MIRO-like
C09G12.8	IPR013753	Ras
C09G12.9	IPR008883	Tumour susceptibility gene 101
C09G12.9	IPR017916	Steadiness box
C09G4.1	IPR006634	TRAM/LAG1/CLN8 homology domain
C09G4.1	IPR016439	Longevity assurance, LAG1/LAC1
C09G4.2	IPR000595	Cyclic nucleotide-binding
C09G4.2	IPR000719	Protein kinase, catalytic domain
C09G4.2	IPR000961	AGC-kinase, C-terminal
C09G4.2	IPR001245	Serine/threonine/tyrosine-protein kinase
C09G4.2	IPR002290	Serine/threonine-protein kinase domain
C09G4.2	IPR008271	Serine/threonine-protein kinase, active site
C09G4.2	IPR017441	Protein kinase, ATP binding site
C09G4.2	IPR017442	Serine/threonine-protein kinase-like domain
C09G4.2	IPR018488	Cyclic nucleotide-binding, conserved site
C09G4.2	IPR020635	Tyrosine-protein kinase, catalytic domain
C09G4.3	IPR000789	Cyclin-dependent kinase, regulatory subunit
C09G4.5	IPR001680	WD40 repeat
C09G4.5	IPR017986	WD40-repeat-containing domain
C09G4.5	IPR019781	WD40 repeat, subgroup
C09G4.5	IPR019782	WD40 repeat 2
C09G5.1	IPR006029	Neurotransmitter-gated ion-channel transmembrane domain
C09G5.1	IPR006201	Neurotransmitter-gated ion-channel
C09G5.1	IPR006202	Neurotransmitter-gated ion-channel ligand-binding
C09G5.1	IPR018000	Neurotransmitter-gated ion-channel, conserved site
C09G5.2	IPR002728	Diphthamide synthesis, DPH1/DHP2
C09G5.2	IPR010014	Diphthamide synthesis, DHP2
C09G5.3	IPR002486	Nematode cuticle collagen, N-terminal
C09G5.3	IPR008160	Collagen triple helix repeat
C09G5.4	IPR002486	Nematode cuticle collagen, N-terminal
C09G5.4	IPR008160	Collagen triple helix repeat
C09G5.5	IPR002486	Nematode cuticle collagen, N-terminal
C09G5.5	IPR008160	Collagen triple helix repeat
C09G5.6	IPR002486	Nematode cuticle collagen, N-terminal
C09G5.6	IPR008160	Collagen triple helix repeat
C09G5.6	IPR012613	Small acid-soluble spore protein, SspO
C09G9.2	IPR001680	WD40 repeat
C09G9.2	IPR019775	WD40 repeat, conserved site
C09G9.6	IPR000571	Zinc finger, CCCH-type
C09G9.6	IPR020557	Fumarate lyase, conserved site
C09H10.2	IPR000552	Ribosomal protein L44e
C09H10.3	IPR001949	NADH:ubiquinone oxidoreductase, 51kDa subunit, conserved site
C09H10.3	IPR011537	NADH ubiquinone oxidoreductase, F subunit
C09H10.3	IPR011538	NADH:ubiquinone oxidoreductase, 51kDa subunit
C09H10.3	IPR019554	Soluble ligand binding domain
C09H10.3	IPR019575	NADH ubiquinone oxidoreductase, F subunit, iron sulphur binding
C09H10.6	IPR019544	Tetratricopeptide, SHNi-TPR domain
C09H10.6	IPR019734	Tetratricopeptide repeat
C09H5.2	IPR001757	ATPase, P-type, K/Mg/Cd/Cu/Zn/Na/Ca/Na/H-transporter
C09H5.2	IPR004014	ATPase, P-type cation-transporter, N-terminal
C09H5.2	IPR005834	Haloacid dehalogenase-like hydrolase
C09H5.2	IPR006068	ATPase, P-type cation-transporter, C-terminal
C09H5.2	IPR008250	ATPase, P-type, ATPase-associated domain
C09H5.2	IPR018303	ATPase, P-type phosphorylation site
C09H6.1	IPR007087	Zinc finger, C2H2-type
C09H6.1	IPR015880	Zinc finger, C2H2-like
C09H6.2	IPR001478	PDZ/DHR/GLGF
C09H6.2	IPR006020	Phosphotyrosine interaction domain
C10A4.1	IPR008906	HAT dimerisation
C10C5.3	IPR001261	ArgE/DapE/ACY1/CPG2/YscS, conserved site
C10C5.3	IPR002933	Peptidase M20
C10C5.3	IPR010159	N-acyl-L-amino-acid amidohydrolase
C10C5.3	IPR011650	Peptidase M20, dimerisation
C10C5.4	IPR001261	ArgE/DapE/ACY1/CPG2/YscS, conserved site
C10C5.4	IPR002933	Peptidase M20
C10C5.4	IPR010159	N-acyl-L-amino-acid amidohydrolase
C10C5.4	IPR011650	Peptidase M20, dimerisation
C10C5.5	IPR001261	ArgE/DapE/ACY1/CPG2/YscS, conserved site
C10C5.5	IPR002933	Peptidase M20
C10C5.5	IPR010159	N-acyl-L-amino-acid amidohydrolase
C10C5.5	IPR011650	Peptidase M20, dimerisation
C10C6.1	IPR000719	Protein kinase, catalytic domain
C10C6.1	IPR001245	Serine/threonine/tyrosine-protein kinase
C10C6.1	IPR001478	PDZ/DHR/GLGF
C10C6.1	IPR002290	Serine/threonine-protein kinase domain
C10C6.1	IPR002575	Aminoglycoside phosphotransferase
C10C6.1	IPR008271	Serine/threonine-protein kinase, active site
C10C6.1	IPR015022	Domain of unknown function DUF1908
C10C6.1	IPR017442	Serine/threonine-protein kinase-like domain
C10C6.1	IPR020635	Tyrosine-protein kinase, catalytic domain
C10C6.2	IPR000276	7TM GPCR, rhodopsin-like
C10C6.2	IPR017452	GPCR, rhodopsin-like superfamily
C10C6.5	IPR003439	ABC transporter-like
C10C6.5	IPR003593	ATPase, AAA+ type, core
C10C6.5	IPR013525	ABC-2 type transporter
C10C6.5	IPR017871	ABC transporter, conserved site
C10C6.6	IPR001757	ATPase, P-type, K/Mg/Cd/Cu/Zn/Na/Ca/Na/H-transporter
C10C6.6	IPR005834	Haloacid dehalogenase-like hydrolase
C10C6.6	IPR006544	ATPase, P-type, unknown pump specificity (type V)
C10C6.6	IPR008250	ATPase, P-type, ATPase-associated domain
C10C6.6	IPR018303	ATPase, P-type phosphorylation site
C10E2.2	IPR001293	Zinc finger, TRAF-type
C10E2.2	IPR001810	Cyclin-like F-box
C10E2.3	IPR000286	Histone deacetylase superfamily
C10E2.3	IPR000408	Regulator of chromosome condensation, RCC1
C10E2.6	IPR011701	Major facilitator superfamily MFS-1
C10F3.2	IPR002198	Short-chain dehydrogenase/reductase SDR
C10F3.2	IPR020904	Short-chain dehydrogenase/reductase, conserved site
C10F3.3	IPR001054	Adenylyl cyclase class-3/4/guanylyl cyclase
C10F3.3	IPR018297	Adenylyl cyclase class-3/4/guanylyl cyclase, conserved site
C10F3.5	IPR000682	Protein-L-isoaspartate(D-aspartate) O-methyltransferase
C10F3.5	IPR007848	Methyltransferase small
C10F3.6	IPR001452	Src homology-3 domain
C10F3.6	IPR011511	Variant SH3
C10F3.6	IPR015827	Alpha-(1,6)-fucosyltransferase, eukaryotic type
C10G11.5	IPR004567	Eukaryotic pantothenate kinase
C10G11.5	IPR011602	Fumble
C10G6.1	IPR002562	3'-5' exonuclease
C10G8.5	IPR003644	Na-Ca exchanger/integrin-beta4
C10G8.5	IPR004836	Sodium/calcium exchanger protein
C10G8.5	IPR004837	Sodium/calcium exchanger membrane region
C10G8.7	IPR001356	Homeobox
C10G8.7	IPR017970	Homeobox, conserved site
C10H11.1	IPR003128	Villin headpiece
C10H11.1	IPR007122	Gelsolin
C10H11.1	IPR007123	Gelsolin domain
C10H11.3	IPR002213	UDP-glucuronosyl/UDP-glucosyltransferase
C10H11.3	IPR007235	Glycosyl transferase, family 28, C-terminal
C10H11.4	IPR002213	UDP-glucuronosyl/UDP-glucosyltransferase
C10H11.4	IPR007235	Glycosyl transferase, family 28, C-terminal
C10H11.5	IPR002213	UDP-glucuronosyl/UDP-glucosyltransferase
C10H11.6	IPR002213	UDP-glucuronosyl/UDP-glucosyltransferase
C10H11.8	IPR001680	WD40 repeat
C10H11.8	IPR017986	WD40-repeat-containing domain
C10H11.8	IPR019775	WD40 repeat, conserved site
C10H11.8	IPR019781	WD40 repeat, subgroup
C10H11.8	IPR019782	WD40 repeat 2
C10H11.9	IPR000719	Protein kinase, catalytic domain
C10H11.9	IPR000961	AGC-kinase, C-terminal
C10H11.9	IPR001245	Serine/threonine/tyrosine-protein kinase
C10H11.9	IPR002219	Protein kinase C-like, phorbol ester/diacylglycerol binding
C10H11.9	IPR002290	Serine/threonine-protein kinase domain
C10H11.9	IPR008271	Serine/threonine-protein kinase, active site
C10H11.9	IPR017441	Protein kinase, ATP binding site
C10H11.9	IPR017442	Serine/threonine-protein kinase-like domain
C10H11.9	IPR017892	Protein kinase, C-terminal
C10H11.9	IPR020635	Tyrosine-protein kinase, catalytic domain
C11D2.2	IPR001461	Peptidase A1
C11D2.2	IPR001969	Peptidase aspartic, active site
C11D2.4	IPR019438	Protein of unknown function DUF2419
C11D2.6	IPR005821	Ion transport
C11D2.6	IPR020606	Ribosomal protein S7, conserved site
C11D2.7	IPR002478	Pseudouridine synthase/archaeosine transglycosylase
C11D2.7	IPR004521	Uncharacterised domain 2
C11D2.7	IPR016437	Translation machinery-associated RNA binding protein, predicted
C11D9.1	IPR000219	Dbl homology (DH) domain
C11E4.1	IPR000889	Glutathione peroxidase
C11E4.2	IPR000889	Glutathione peroxidase
C11E4.6	IPR001660	Sterile alpha motif
C11E4.6	IPR002110	Ankyrin repeat
C11E4.6	IPR006020	Phosphotyrosine interaction domain
C11E4.6	IPR011510	Sterile alpha motif, type 2
C11E4.6	IPR020683	Ankyrin repeat-containing domain
C11E4.6	IPR021129	Sterile alpha motif, type 1
C11G6.1	IPR006565	Bromodomain transcription factor
C11G6.3	IPR001965	Zinc finger, PHD-type
C11G6.3	IPR019786	Zinc finger, PHD-type, conserved site
C11G6.3	IPR019787	Zinc finger, PHD-finger
C11H1.3	IPR001841	Zinc finger, RING-type
C11H1.3	IPR018957	Zinc finger, C3HC4 RING-type
C11H1.4	IPR003593	ATPase, AAA+ type, core
C11H1.4	IPR003959	ATPase, AAA-type, core
C11H1.4	IPR003960	ATPase, AAA-type, conserved site
C11H1.4	IPR015342	Peroxisome biogenesis factor 1, N-terminal
C12C8.1	IPR013126	Heat shock protein 70
C12C8.1	IPR018181	Heat shock protein 70, conserved site
C12C8.2	IPR000277	Cys/Met metabolism, pyridoxal phosphate-dependent enzyme
C12C8.3	IPR000315	Zinc finger, B-box
C12C8.3	IPR001258	NHL repeat
C12C8.3	IPR001298	Filamin/ABP280 repeat
C12C8.3	IPR003649	B-box, C-terminal
C12C8.3	IPR013017	NHL repeat. subgroup
C12C8.3	IPR017868	Filamin/ABP280 repeat-like
C12D12.2	IPR001991	Sodium:dicarboxylate symporter
C12D12.2	IPR018107	Sodium:dicarboxylate symporter, conserved site
C12D12.5	IPR000910	High mobility group, HMG1/HMG2
C12D5.7	IPR001128	Cytochrome P450
C12D5.7	IPR017972	Cytochrome P450, conserved site
C12D8.1	IPR004087	K Homology
C12D8.1	IPR004088	K Homology, type 1
C12D8.1	IPR015096	Domain of unknown function DUF1897
C12D8.1	IPR018111	K Homology, type 1, subgroup
C12D8.10	IPR000719	Protein kinase, catalytic domain
C12D8.10	IPR000961	AGC-kinase, C-terminal
C12D8.10	IPR001245	Serine/threonine/tyrosine-protein kinase
C12D8.10	IPR001849	Pleckstrin homology
C12D8.10	IPR002290	Serine/threonine-protein kinase domain
C12D8.10	IPR008271	Serine/threonine-protein kinase, active site
C12D8.10	IPR017441	Protein kinase, ATP binding site
C12D8.10	IPR017442	Serine/threonine-protein kinase-like domain
C12D8.10	IPR017892	Protein kinase, C-terminal
C12D8.10	IPR020635	Tyrosine-protein kinase, catalytic domain
C12D8.11	IPR008858	TROVE
C12D8.8	IPR002486	Nematode cuticle collagen, N-terminal
C12D8.8	IPR008160	Collagen triple helix repeat
C13B4.1	IPR005018	DOMON related
C13B4.1	IPR006593	Cytochrome b561/ferric reductase transmembrane
C13B4.1	IPR013050	DOMON
C13B4.2	IPR000626	Ubiquitin
C13B4.2	IPR001394	Peptidase C19, ubiquitin carboxyl-terminal hydrolase 2
C13B4.2	IPR018200	Peptidase C19, ubiquitin carboxyl-terminal hydrolase 2, conserved site
C13B9.2	IPR007835	MOFRL
C13B9.3	IPR008968	Clathrin adaptor, mu subunit, C-terminal
C13B9.4	IPR000832	GPCR, family 2, secretin-like
C13B9.4	IPR001879	GPCR, family 2, extracellular hormone receptor domain
C13B9.4	IPR017981	GPCR, family 2-like
C13B9.4	IPR017983	GPCR, family 2, secretin-like, conserved site
C13C4.4	IPR005834	Haloacid dehalogenase-like hydrolase
C13C4.4	IPR006355	HAD-superfamily hydrolase, subfamily IIA, hypothetical 2
C13C4.4	IPR006357	HAD-superfamily hydrolase, subfamily IIA
C13C4.5	IPR011701	Major facilitator superfamily MFS-1
C13D9.7	IPR004837	Sodium/calcium exchanger membrane region
C13D9.8	IPR004837	Sodium/calcium exchanger membrane region
C13D9.9	IPR002213	UDP-glucuronosyl/UDP-glucosyltransferase
C13D9.9	IPR007235	Glycosyl transferase, family 28, C-terminal
C13F10.2	IPR019371	Domain of unknown function KxDL
C13F10.5	IPR019387	Domain of unknown function SAYSvFN
C13G3.3	IPR002554	Protein phosphatase 2A, regulatory B subunit, B56
C13G5.1	IPR001356	Homeobox
C13G5.1	IPR017970	Homeobox, conserved site
C14A11.3	IPR000219	Dbl homology (DH) domain
C14A11.3	IPR001849	Pleckstrin homology
C14A11.7	IPR002041	Ran GTPase
C14A11.7	IPR003577	Ras small GTPase, Ras type
C14A11.7	IPR003578	Small GTPase, Rho type
C14A11.7	IPR003579	Ras small GTPase, Rab type
C14A11.7	IPR005225	Small GTP-binding protein
C14A11.7	IPR013684	MIRO-like
C14A11.7	IPR013753	Ras
C14A4.1	IPR004155	PBS lyase HEAT-like repeat
C14A4.1	IPR021133	HEAT, type 2
C14A4.10	IPR003195	Transcription initiation factor IID, 18kDa subunit
C14A4.11	IPR009652	Protein of unknown function DUF1241
C14A4.14	IPR019374	Ribosomal protein S22, mitochondrial
C14A4.2	IPR019368	Ribosomal protein S23/S29, mitochondrial
C14A4.3	IPR005599	Alg9-like mannosyltransferase
C14A4.4	IPR002121	Helicase/RNase D C-terminal, HRDC domain
C14A4.4	IPR002562	3'-5' exonuclease
C14A4.4	IPR012588	Exosome-associated factor Rrp6, N-terminal
C14A4.5	IPR001247	Exoribonuclease, phosphorolytic domain 1
C14A6.1	IPR001304	C-type lectin
C14B1.1	IPR005788	Disulphide isomerase
C14B1.1	IPR005792	Protein disulphide isomerase
C14B1.1	IPR013766	Thioredoxin domain
C14B1.1	IPR017936	Thioredoxin-like
C14B1.1	IPR017937	Thioredoxin, conserved site
C14B1.10	IPR005123	Oxoglutarate/iron-dependent oxygenase
C14B1.10	IPR013216	Methyltransferase type 11
C14B1.4	IPR001680	WD40 repeat
C14B1.4	IPR016346	Guanine nucleotide-binding protein, beta subunit
C14B1.4	IPR017986	WD40-repeat-containing domain
C14B1.4	IPR019775	WD40 repeat, conserved site
C14B1.4	IPR019781	WD40 repeat, subgroup
C14B1.4	IPR019782	WD40 repeat 2
C14B1.5	IPR002728	Diphthamide synthesis, DPH1/DHP2
C14B1.5	IPR016435	Diphthamide synthesis, DHP1
C14B9.1	IPR002068	Heat shock protein Hsp20
C14B9.2	IPR005788	Disulphide isomerase
C14B9.2	IPR005792	Protein disulphide isomerase
C14B9.2	IPR013766	Thioredoxin domain
C14B9.2	IPR017068	Protein disulphide-isomerase A4
C14B9.2	IPR017936	Thioredoxin-like
C14B9.2	IPR017937	Thioredoxin, conserved site
C14B9.4	IPR000719	Protein kinase, catalytic domain
C14B9.4	IPR000959	POLO box duplicated domain
C14B9.4	IPR001245	Serine/threonine/tyrosine-protein kinase
C14B9.4	IPR002290	Serine/threonine-protein kinase domain
C14B9.4	IPR008271	Serine/threonine-protein kinase, active site
C14B9.4	IPR017441	Protein kinase, ATP binding site
C14B9.4	IPR017442	Serine/threonine-protein kinase-like domain
C14B9.4	IPR020635	Tyrosine-protein kinase, catalytic domain
C14B9.6	IPR001005	SANT, DNA-binding
C14B9.6	IPR014778	Myb, DNA-binding
C14B9.6	IPR017877	MYB-like
C14B9.6	IPR017884	SANT, eukarya
C14B9.7	IPR001147	Ribosomal protein L21e
C14B9.7	IPR018259	Ribosomal protein L21e, conserved site
C14C10.1	IPR018108	Mitochondrial substrate/solute carrier
C14C11.3	IPR015883	Glycoside hydrolase, family 20, catalytic core
C14C11.6	IPR000629	RNA helicase, ATP-dependent, DEAD-box, conserved site
C14C11.6	IPR001650	DNA/RNA helicase, C-terminal
C14C11.6	IPR011545	DNA/RNA helicase, DEAD/DEAH box type, N-terminal
C14C11.6	IPR014001	DEAD-like helicase, N-terminal
C14C11.6	IPR014021	Helicase, superfamily 1/2, ATP-binding domain
C14E2.2	IPR004839	Aminotransferase, class I/II
C14F11.1	IPR004838	Aminotransferases, class-I, pyridoxal-phosphate-binding site
C14F11.1	IPR004839	Aminotransferase, class I/II
C14F11.2	IPR001611	Leucine-rich repeat
C14F11.2	IPR001715	Calponin-like actin-binding
C14F11.2	IPR003591	Leucine-rich repeat, typical subtype
C14F11.5	IPR002068	Heat shock protein Hsp20
C14F5.1	IPR010548	BNIP3
C14F5.4	IPR004686	Tricarboxylate/iron carrier
C14F5.5	IPR000980	SH2 motif
C14F5.5	IPR001452	Src homology-3 domain
C14F5.5	IPR011511	Variant SH3
C14H10.1	IPR003689	Zinc/iron permease
C15A11.1	IPR002486	Nematode cuticle collagen, N-terminal
C15A11.1	IPR008160	Collagen triple helix repeat
C15A11.5	IPR002486	Nematode cuticle collagen, N-terminal
C15A11.5	IPR008160	Collagen triple helix repeat
C15A11.6	IPR002486	Nematode cuticle collagen, N-terminal
C15A11.6	IPR008160	Collagen triple helix repeat
C15A7.2	IPR019336	Rhodopsin-like GPCR transmembrane domain
C15B12.1	IPR006076	FAD dependent oxidoreductase
C15B12.7	IPR002524	Cation efflux protein
C15B12.7	IPR022272	Lipocalin conserved site
C15B12.8	IPR002218	Glucose-inhibited division protein A-related
C15B12.8	IPR003953	Fumarate reductase/succinate dehydrogenase flavoprotein, N-terminal
C15B12.8	IPR006076	FAD dependent oxidoreductase
C15C6.4	IPR002730	Ribonuclease P/MRP, subunit p29, eukaryotic/archaeal
C15C6.4	IPR016848	Ribonuclease P/MRP, p29 subunit, eukaryotic
C15C7.1	IPR000727	Target SNARE coiled-coil domain
C15C7.1	IPR006012	Syntaxin/epimorphin, conserved site
C15C7.2	IPR000237	GRIP
C15C7.7	IPR019378	GDP-fucose protein O-fucosyltransferase
C15C8.2	IPR000014	PAS
C15C8.2	IPR013655	PAS fold-3
C15C8.3	IPR001461	Peptidase A1
C15C8.4	IPR010483	Alpha-2-macroglobulin RAP, C-terminal
C15F1.1	IPR003582	Metridin-like ShK toxin
C15F1.1	IPR014878	Domain of unknown function DUF1794
C15F1.4	IPR005835	Nucleotidyl transferase
C15F1.6	IPR001104	3-oxo-5-alpha-steroid 4-dehydrogenase, C-terminal
C15F1.6	IPR019955	Ubiquitin supergroup
C15F1.7	IPR001424	Superoxide dismutase, copper/zinc binding
C15F1.7	IPR018152	Superoxide dismutase, copper/zinc, binding site
C15H11.3	IPR005637	TAP, C-terminal
C15H11.3	IPR018222	Nuclear transport factor 2, Eukaryote
C15H11.4	IPR002198	Short-chain dehydrogenase/reductase SDR
C15H11.6	IPR018222	Nuclear transport factor 2, Eukaryote
C15H11.7	IPR000426	Proteasome, alpha-subunit, conserved site
C15H11.7	IPR001353	Proteasome, subunit alpha/beta
C15H11.8	IPR001222	Zinc finger, TFIIS-type
C15H11.9	IPR007023	Ribosomal biogenesis regulatory protein
C15H9.1	IPR004003	NAD(P) transhydrogenase, beta subunit
C15H9.1	IPR004571	NAD(P) transhydrogenase, alpha subunit
C15H9.1	IPR006162	Phosphopantetheine attachment site
C15H9.1	IPR007698	Alanine dehydrogenase/PNT, C-terminal
C15H9.1	IPR007886	Alanine dehydrogenase/PNT, N-terminal
C15H9.4	IPR019394	Predicted transmembrane/coiled-coil 2 protein
C15H9.5	IPR009637	Transmembrane receptor, eukaryota
C15H9.6	IPR013126	Heat shock protein 70
C15H9.6	IPR018181	Heat shock protein 70, conserved site
C15H9.7	IPR010111	Kynureninase
C15H9.8	IPR006162	Phosphopantetheine attachment site
C15H9.8	IPR006966	Peroxin-3
C16A11.2	IPR019159	Protein of unknown function DUF2037
C16A3.1	IPR000330	SNF2-related
C16A3.1	IPR001650	DNA/RNA helicase, C-terminal
C16A3.1	IPR014001	DEAD-like helicase, N-terminal
C16A3.1	IPR014021	Helicase, superfamily 1/2, ATP-binding domain
C16A3.10	IPR005814	Aminotransferase class-III
C16A3.10	IPR010164	Ornithine aminotransferase
C16A3.2	IPR000340	Dual specificity phosphatase, catalytic domain
C16A3.2	IPR000387	Dual-specific/protein-tyrosine phosphatase, conserved region
C16A3.2	IPR003595	Protein-tyrosine phosphatase, catalytic
C16A3.2	IPR016130	Protein-tyrosine phosphatase, active site
C16A3.2	IPR020422	Dual specificity phosphatase, subgroup, catalytic domain
C16A3.3	IPR003029	Ribosomal protein S1, RNA binding domain
C16A3.3	IPR003107	RNA-processing protein, HAT helix
C16A3.3	IPR013026	Tetratricopeptide repeat-containing
C16A3.4	IPR003604	Zinc finger, U1-type
C16A3.4	IPR007087	Zinc finger, C2H2-type
C16A3.4	IPR015880	Zinc finger, C2H2-like
C16A3.5	IPR008011	Complex 1 LYR protein
C16A3.6	IPR006958	Mak16 protein
C16A3.7	IPR000967	Zinc finger, NF-X1-type
C16A3.7	IPR001374	Single-stranded nucleic acid binding R3H
C16A3.7	IPR001841	Zinc finger, RING-type
C16A3.9	IPR000589	Ribosomal protein S15
C16A3.9	IPR012606	Ribosomal protein S13/S15, N-terminal
C16B8.1	IPR000719	Protein kinase, catalytic domain
C16B8.1	IPR001245	Serine/threonine/tyrosine-protein kinase
C16B8.1	IPR002290	Serine/threonine-protein kinase domain
C16B8.1	IPR003306	WIF domain
C16B8.1	IPR008266	Tyrosine-protein kinase, active site
C16B8.1	IPR017442	Serine/threonine-protein kinase-like domain
C16B8.1	IPR020635	Tyrosine-protein kinase, catalytic domain
C16C10.1	IPR018108	Mitochondrial substrate/solute carrier
C16C10.10	IPR004360	Glyoxalase/bleomycin resistance protein/dioxygenase
C16C10.12	IPR003439	ABC transporter-like
C16C10.12	IPR003593	ATPase, AAA+ type, core
C16C10.12	IPR005284	Pigment precursor permease
C16C10.12	IPR013525	ABC-2 type transporter
C16C10.12	IPR017871	ABC transporter, conserved site
C16C10.2	IPR007144	Small-subunit processome, Utp11
C16C10.4	IPR010516	Sin3 associated polypeptide p18
C16C10.5	IPR001841	Zinc finger, RING-type
C16C10.5	IPR018957	Zinc finger, C3HC4 RING-type
C16C10.6	IPR018612	Protein of unknown function DUF2040, coiled-coil
C16C10.7	IPR001841	Zinc finger, RING-type
C16C10.7	IPR017907	Zinc finger, RING-type, conserved site
C16C10.7	IPR018957	Zinc finger, C3HC4 RING-type
C16C10.8	IPR014898	Zinc finger, C2H2, LYAR-type
C16C2.1	IPR001356	Homeobox
C16C2.1	IPR017970	Homeobox, conserved site
C16C2.2	IPR000342	Regulator of G protein signalling
C16C2.2	IPR000591	DEP domain
C16C2.2	IPR015898	G-protein, gamma-like subunit
C16C2.3	IPR000198	RhoGAP
C16C2.3	IPR000300	Inositol polyphosphate related phosphatase
C16C2.3	IPR005135	Endonuclease/exonuclease/phosphatase
C16C2.4	IPR005607	BSD
C16C8.2	IPR002007	Haem peroxidase, animal
C16C8.2	IPR003582	Metridin-like ShK toxin
C16D6.2	IPR000276	7TM GPCR, rhodopsin-like
C16D6.2	IPR017452	GPCR, rhodopsin-like superfamily
C16D6.2	IPR019424	7TM GPCR, serpentine receptor class sx (Srsx)
C16D9.2	IPR000719	Protein kinase, catalytic domain
C16D9.2	IPR001245	Serine/threonine/tyrosine-protein kinase
C16D9.2	IPR002290	Serine/threonine-protein kinase domain
C16D9.2	IPR003961	Fibronectin, type III
C16D9.2	IPR017442	Serine/threonine-protein kinase-like domain
C16D9.2	IPR020635	Tyrosine-protein kinase, catalytic domain
C16E9.1	IPR002035	von Willebrand factor, type A
C16E9.2	IPR019141	Protein of unknown function DUF2045
C16H3.1	IPR018249	EF-HAND 2
C16H3.2	IPR001079	Galectin, carbohydrate recognition domain
C17C3.1	IPR003703	Acyl-CoA thioesterase
C17C3.12	IPR006089	Acyl-CoA dehydrogenase, conserved site
C17C3.12	IPR006090	Acyl-CoA oxidase/dehydrogenase, type 1
C17C3.12	IPR006091	Acyl-CoA oxidase/dehydrogenase, central domain
C17C3.12	IPR006092	Acyl-CoA dehydrogenase, N-terminal
C17C3.12	IPR013107	Acyl-CoA dehydrogenase, type 2, C-terminal
C17C3.3	IPR003703	Acyl-CoA thioesterase
C17D12.2	IPR000504	RNA recognition motif, RNP-1
C17D12.6	IPR000742	EGF-like, type 3
C17D12.6	IPR001881	EGF-like calcium-binding
C17D12.6	IPR006209	EGF
C17D12.6	IPR006210	EGF-like
C17D12.6	IPR013032	EGF-like region, conserved site
C17E4.3	IPR011016	Zinc finger, RING-CH-type
C17E4.3	IPR018957	Zinc finger, C3HC4 RING-type
C17E4.5	IPR000504	RNA recognition motif, RNP-1
C17E4.6	IPR008895	YL1 nuclear
C17E4.6	IPR013272	YL1 nuclear, C-terminal
C17E4.9	IPR000402	ATPase, P-type cation exchange, beta subunit
C17F4.8	IPR000210	BTB/POZ-like
C17F4.8	IPR003131	Potassium channel, voltage dependent, Kv, tetramerisation
C17G1.3	IPR002213	UDP-glucuronosyl/UDP-glucosyltransferase
C17G1.3	IPR007235	Glycosyl transferase, family 28, C-terminal
C17G1.7	IPR001216	Cysteine synthase/cystathionine beta-synthase P-phosphate-binding site
C17G1.7	IPR001926	Pyridoxal phosphate-dependent enzyme, beta subunit
C17G1.7	IPR005856	Cysteine synthase K/M
C17G1.7	IPR005859	Cysteine synthase A
C17G1.8	IPR018499	Tetraspanin
C17G10.1	IPR005123	Oxoglutarate/iron-dependent oxygenase
C17G10.1	IPR006620	Prolyl 4-hydroxylase, alpha subunit
C17G10.1	IPR020904	Short-chain dehydrogenase/reductase, conserved site
C17G10.2	IPR001440	Tetratricopeptide TPR-1
C17G10.2	IPR019734	Tetratricopeptide repeat
C17G10.4	IPR000242	Protein-tyrosine phosphatase, receptor/non-receptor type
C17G10.4	IPR000340	Dual specificity phosphatase, catalytic domain
C17G10.4	IPR000387	Dual-specific/protein-tyrosine phosphatase, conserved region
C17G10.4	IPR006612	Zinc finger, C2CH-type
C17G10.4	IPR016130	Protein-tyrosine phosphatase, active site
C17G10.4	IPR020422	Dual specificity phosphatase, subgroup, catalytic domain
C17G10.8	IPR002198	Short-chain dehydrogenase/reductase SDR
C17G10.8	IPR003033	Sterol-binding
C17G10.9	IPR019382	RNA polymerase I-associated factor PAF67
C17H11.6	IPR001841	Zinc finger, RING-type
C17H11.6	IPR002867	Zinc finger, C6HC-type
C17H11.6	IPR018957	Zinc finger, C3HC4 RING-type
C17H12.1	IPR001680	WD40 repeat
C17H12.1	IPR017986	WD40-repeat-containing domain
C17H12.1	IPR019781	WD40 repeat, subgroup
C17H12.1	IPR019782	WD40 repeat 2
C17H12.14	IPR002842	ATPase, V1/A1 complex, subunit E
C17H12.2	IPR018795	Protein of unknown function DUF2152
C17H12.9	IPR001356	Homeobox
C17H12.9	IPR003350	Homeodomain protein CUT
C17H12.9	IPR020003	ATPase, F1/V1/A1 complex, alpha/beta subunit, nucleotide-binding domain, active site
C18A3.1	IPR002052	DNA methylase, N-6 adenine-specific, conserved site
C18A3.1	IPR007757	MT-A70
C18A3.3	IPR008610	Eukaryotic rRNA processing
C18A3.5	IPR000504	RNA recognition motif, RNP-1
C18A3.5	IPR003954	RNA recognition, domain 1
C18A3.6	IPR002041	Ran GTPase
C18A3.6	IPR003577	Ras small GTPase, Ras type
C18A3.6	IPR003578	Small GTPase, Rho type
C18A3.6	IPR003579	Ras small GTPase, Rab type
C18A3.6	IPR005225	Small GTP-binding protein
C18A3.6	IPR013684	MIRO-like
C18A3.6	IPR013753	Ras
C18A3.8	IPR001092	Helix-loop-helix DNA-binding domain
C18B12.2	IPR000832	GPCR, family 2, secretin-like
C18B12.2	IPR001879	GPCR, family 2, extracellular hormone receptor domain
C18B12.2	IPR017981	GPCR, family 2-like
C18B12.2	IPR017983	GPCR, family 2, secretin-like, conserved site
C18B12.3	IPR001356	Homeobox
C18B12.3	IPR017970	Homeobox, conserved site
C18B12.4	IPR001841	Zinc finger, RING-type
C18B12.4	IPR018957	Zinc finger, C3HC4 RING-type
C18B12.6	IPR012936	Protein of unknown function DUF1692
C18B2.4	IPR004182	GRAM
C18B2.4	IPR018826	WW-domain-binding protein
C18B2.6	IPR001873	Na+ channel, amiloride-sensitive
C18C4.10	IPR001440	Tetratricopeptide TPR-1
C18C4.10	IPR011716	Tetratricopeptide TPR-3
C18C4.10	IPR013026	Tetratricopeptide repeat-containing
C18C4.10	IPR015390	Rabaptin, GTPase-Rab5 binding
C18C4.10	IPR015792	Kinesin light chain repeat
C18C4.10	IPR019734	Tetratricopeptide repeat
C18C4.2	IPR000871	Beta-lactamase, class A/D
C18C4.2	IPR003439	ABC transporter-like
C18C4.2	IPR005025	NADPH-dependent FMN reductase
C18C4.2	IPR017940	ABC transporter integral membrane type 1
C18C4.3	IPR001412	Aminoacyl-tRNA synthetase, class I, conserved site
C18C4.3	IPR002213	UDP-glucuronosyl/UDP-glucosyltransferase
C18C4.3	IPR007235	Glycosyl transferase, family 28, C-terminal
C18D11.2	IPR000582	Acyl-CoA-binding protein, ACBP
C18D11.4	IPR000504	RNA recognition motif, RNP-1
C18E3.2	IPR003121	SWIB/MDM2 domain
C18E3.2	IPR019835	SWIB domain
C18E3.5	IPR001680	WD40 repeat
C18E3.5	IPR017986	WD40-repeat-containing domain
C18E3.5	IPR019775	WD40 repeat, conserved site
C18E3.5	IPR019781	WD40 repeat, subgroup
C18E3.5	IPR019782	WD40 repeat 2
C18E3.6	IPR006599	CARP motif
C18E3.6	IPR013912	Adenylate cyclase-associated CAP, C-terminal
C18E3.6	IPR013992	Adenylate cyclase-associated CAP, N-terminal
C18E3.6	IPR017901	C-CAP/cofactor C-like domain
C18E3.8	IPR001108	Peptidase A22A, presenilin
C18E3.8	IPR006639	Peptidase A22, presenilin signal peptide
C18E9.11	IPR010448	Torsin
C18E9.11	IPR017378	Torsin, subgroup
C18E9.2	IPR004728	Translocation protein Sec62
C18E9.6	IPR001925	Porin, eukaryotic type
C18F10.7	IPR002110	Ankyrin repeat
C18F10.7	IPR003903	Ubiquitin interacting motif
C18F10.7	IPR020683	Ankyrin repeat-containing domain
C18F3.2	IPR003598	Immunoglobulin subtype 2
C18F3.2	IPR003599	Immunoglobulin subtype
C18F3.2	IPR003961	Fibronectin, type III
C18F3.2	IPR007110	Immunoglobulin-like
C18G1.5	IPR005818	Histone H1/H5
C18H7.1	IPR002035	von Willebrand factor, type A
C18H7.3	IPR002486	Nematode cuticle collagen, N-terminal
C18H7.3	IPR008160	Collagen triple helix repeat
C18H7.4	IPR000719	Protein kinase, catalytic domain
C18H7.4	IPR000980	SH2 motif
C18H7.4	IPR001245	Serine/threonine/tyrosine-protein kinase
C18H7.4	IPR002290	Serine/threonine-protein kinase domain
C18H7.4	IPR008266	Tyrosine-protein kinase, active site
C18H7.4	IPR017441	Protein kinase, ATP binding site
C18H7.4	IPR017442	Serine/threonine-protein kinase-like domain
C18H7.4	IPR020635	Tyrosine-protein kinase, catalytic domain
C18H9.3	IPR003169	GYF
C18H9.7	IPR001841	Zinc finger, RING-type
C18H9.7	IPR001965	Zinc finger, PHD-type
C18H9.7	IPR013026	Tetratricopeptide repeat-containing
C18H9.7	IPR014857	Zinc finger, RING-like
C18H9.7	IPR018957	Zinc finger, C3HC4 RING-type
C18H9.7	IPR019568	Rapsyn, myristoylation/linker region, N-terminal
C18H9.7	IPR019734	Tetratricopeptide repeat
C23F12.1	IPR001298	Filamin/ABP280 repeat
C23F12.1	IPR001715	Calponin-like actin-binding
C23F12.1	IPR003006	Immunoglobulin/major histocompatibility complex, conserved site
C23F12.1	IPR017868	Filamin/ABP280 repeat-like
C23G10.2	IPR006056	YjgF-like protein
C23G10.2	IPR006175	Endoribonuclease L-PSP
C23G10.2	IPR019897	YjgF-like protein, conserved site
C23G10.3	IPR001351	Ribosomal protein S3, C-terminal
C23G10.3	IPR004044	K Homology, type 2
C23G10.3	IPR005703	Ribosomal protein S3, eukaryotic/archaeal
C23G10.3	IPR018280	Ribosomal protein S3, conserved site
C23G10.4	IPR016642	26S proteasome regulatory complex, non-ATPase subcomplex, Rpn2/Psmd1 subunit
C23G10.6	IPR002213	UDP-glucuronosyl/UDP-glucosyltransferase
C23G10.7	IPR011671	AdoMet-dependent methyltransferase, predicted
C23H3.3	IPR004087	K Homology
C23H3.3	IPR009210	Predicted eukaryotic LigT
C23H3.3	IPR018111	K Homology, type 1, subgroup
C23H3.4	IPR004839	Aminotransferase, class I/II
C23H3.7	IPR001661	Glycoside hydrolase, family 37
C23H3.7	IPR018232	Glycoside hydrolase, family 37, conserved site
C23H4.1	IPR009635	Neural proliferation differentiation control-1
C23H4.6	IPR003395	RecF/RecN/SMC protein, N-terminal
C23H5.2	IPR000971	Globin, subset
C23H5.7	IPR000595	Cyclic nucleotide-binding
C23H5.7	IPR005821	Ion transport
C24A1.2	IPR000418	Ets
C24A1.3	IPR000719	Protein kinase, catalytic domain
C24A1.3	IPR001245	Serine/threonine/tyrosine-protein kinase
C24A1.3	IPR002110	Ankyrin repeat
C24A1.3	IPR002290	Serine/threonine-protein kinase domain
C24A1.3	IPR017441	Protein kinase, ATP binding site
C24A1.3	IPR017442	Serine/threonine-protein kinase-like domain
C24A1.3	IPR020635	Tyrosine-protein kinase, catalytic domain
C24A1.3	IPR020683	Ankyrin repeat-containing domain
C24A11.8	IPR000299	FERM domain
C24A11.8	IPR014847	FERM adjacent (FA)
C24A11.8	IPR018979	FERM, N-terminal
C24A11.8	IPR019748	FERM central domain
C24A11.8	IPR019749	Band 4.1 domain
C24A11.9	IPR000092	Polyprenyl synthetase
C24A3.4	IPR003673	CoA-transferase family III
C24A3.4	IPR016160	Aldehyde dehydrogenase, conserved site
C24A3.6	IPR013099	Ion transport 2
C24A8.1	IPR000276	7TM GPCR, rhodopsin-like
C24A8.1	IPR017452	GPCR, rhodopsin-like superfamily
C24A8.4	IPR000719	Protein kinase, catalytic domain
C24A8.4	IPR001245	Serine/threonine/tyrosine-protein kinase
C24A8.4	IPR002290	Serine/threonine-protein kinase domain
C24A8.4	IPR017441	Protein kinase, ATP binding site
C24A8.4	IPR017442	Serine/threonine-protein kinase-like domain
C24A8.4	IPR020635	Tyrosine-protein kinase, catalytic domain
C24A8.6	IPR000276	7TM GPCR, rhodopsin-like
C24A8.6	IPR017452	GPCR, rhodopsin-like superfamily
C24B5.2	IPR003593	ATPase, AAA+ type, core
C24B5.2	IPR003959	ATPase, AAA-type, core
C24B5.2	IPR003960	ATPase, AAA-type, conserved site
C24B5.2	IPR011704	ATPase, AAA-5
C24B5.3	IPR000731	Sterol-sensing 5TM box
C24B5.3	IPR003392	Patched
C24B5.3	IPR006162	Phosphopantetheine attachment site
C24B5.4	IPR015021	Domain of unknown function DUF1907
C24F3.1	IPR006634	TRAM/LAG1/CLN8 homology domain
C24F3.1	IPR013599	TRAM1-like protein
C24F3.1	IPR016447	Translocation associated membrane protein
C24F3.2	IPR000340	Dual specificity phosphatase, catalytic domain
C24F3.2	IPR000387	Dual-specific/protein-tyrosine phosphatase, conserved region
C24F3.2	IPR016278	Tyrosine protein phosphatase, dual specificity, 12
C24F3.2	IPR020422	Dual specificity phosphatase, subgroup, catalytic domain
C24F3.3	IPR001506	Peptidase M12A, astacin
C24F3.3	IPR003582	Metridin-like ShK toxin
C24F3.3	IPR006026	Peptidase, metallopeptidase
C24F3.4	IPR003010	Nitrilase/cyanide hydratase and apolipoprotein N-acyltransferase
C24F3.4	IPR003694	NAD+ synthase
C24F3.4	IPR014445	Glutamine-dependent NAD(+) synthetase, GAT domain-containing
C24F3.6	IPR002486	Nematode cuticle collagen, N-terminal
C24F3.6	IPR008160	Collagen triple helix repeat
C24G6.6	IPR002937	Amine oxidase
C24G6.6	IPR006076	FAD dependent oxidoreductase
C24G6.8	IPR000449	Ubiquitin-associated/translation elongation factor EF1B, N-terminal
C24G6.8	IPR002833	Peptidyl-tRNA hydrolase, PTH2
C24G6.8	IPR015940	Ubiquitin-associated/translation elongation factor EF1B, N-terminal, eukaryote
C24G7.1	IPR001873	Na+ channel, amiloride-sensitive
C24G7.2	IPR001873	Na+ channel, amiloride-sensitive
C24G7.4	IPR001873	Na+ channel, amiloride-sensitive
C24H10.5	IPR002048	Calcium-binding EF-hand
C24H10.5	IPR018247	EF-Hand 1, calcium-binding site
C24H10.5	IPR018248	EF-Hand, Calmodulin
C24H10.5	IPR018249	EF-HAND 2
C24H11.3	IPR001699	Transcription factor, T-box
C24H11.3	IPR018186	Transcription factor, T-box, conserved site
C24H11.6	IPR000223	Peptidase S26A, signal peptidase I
C24H11.6	IPR019759	Peptidase S24/S26A/S26B, conserved region
C24H11.7	IPR000904	SEC7-like
C24H11.8	IPR013099	Ion transport 2
C24H12.4	IPR001650	DNA/RNA helicase, C-terminal
C24H12.4	IPR011545	DNA/RNA helicase, DEAD/DEAH box type, N-terminal
[truncated: 15,509 more rows]
