# Supplementary material for: OrthoList: A Compendium of C. elegans Genes with Human Orthologs
Source: PLoS One. 2011 May 25;6(5):e20085. doi: 10.1371/journal.pone.0020085 (PMC3102077; doi:10.1371/journal.pone.0020085)
Supplement: Table S11 — Biological process (bp) GO annotations of OrthoList. A) Gene-focused pivot report. B) bp-focused pivot report. C) All OrthoList genes with bp GO annotations (6,951/7,633, or ∼77%), and their associated annotations. This is source data for pivot reports in Tables S11A, B. (XLS) [file pone.0020085.s011.xls]

## Sheet: A) gene-focused report
Count of GO ID
Gene ID	GO Term	Total
2RSSE.1	signal transduction	1
4R79.1	proteolysis	1
4R79.2	intracellular protein transport	1
	nucleocytoplasmic transport	1
	protein transport	1
	signal transduction	1
	small GTPase mediated signal transduction	1
AC3.5	proteolysis	1
AC3.7	carbohydrate metabolic process	1
	determination of adult life span	1
	lipid glycosylation	1
	metabolic process	1
	positive regulation of growth rate	1
AC3.8	carbohydrate metabolic process	1
	lipid glycosylation	1
	metabolic process	1
AC7.2	fibroblast growth factor receptor signaling pathway	1
	muscle organ development	1
	nematode larval development	1
	positive regulation of growth rate	1
	regulation of cell projection organization	1
AH6.2	cation transport	1
	transmembrane transport	1
B0001.4	metabolic process	1
B0024.11	pseudouridine synthesis	1
	RNA modification	1
B0024.12	hatching	1
	metabolic process	1
B0024.14	molting cycle, collagen and cuticulin-based cuticle	1
	negative regulation of multicellular organism growth	1
	positive regulation of multicellular organism growth	1
	regulation of cell growth	1
	reproduction	1
B0024.15	protein amino acid glycosylation	1
B0024.8	chemotaxis	1
	dauer entry	1
	hyperosmotic response	1
	sensory cilium assembly	1
B0024.9	cell redox homeostasis	1
B0025.1	ecdysis, collagen and cuticulin-based cuticle	1
	growth	1
	locomotion	1
	nematode larval development	1
	nuclear envelope organization	1
	phosphoinositide phosphorylation	1
	phosphoinositide-mediated signaling	1
	positive regulation of growth rate	1
	regulation of endocytosis	1
	regulation of protein secretion	1
	reproduction	1
B0025.2	cytokinesis	1
	embryonic development ending in birth or egg hatching	1
	oviposition	1
	positive regulation of growth rate	1
	reproduction	1
B0034.3	associative learning	1
	embryonic development ending in birth or egg hatching	1
	homophilic cell adhesion	1
	olfactory learning	1
B0035.10	body morphogenesis	1
	embryonic development ending in birth or egg hatching	1
	growth	1
	nematode larval development	1
	nucleosome assembly	1
	positive regulation of growth rate	1
	reproduction	1
B0035.11	body morphogenesis	1
	embryonic development ending in birth or egg hatching	1
	growth	1
	hermaphrodite genitalia development	1
	locomotion	1
	nematode larval development	1
	positive regulation of growth rate	1
	positive regulation of multicellular organism growth	1
	receptor-mediated endocytosis	1
	reproduction	1
B0035.12	cell division	1
	cytokinesis	1
	determination of adult life span	1
	embryonic development ending in birth or egg hatching	1
	growth	1
	locomotion	1
	nematode larval development	1
	oviposition	1
	positive regulation of growth rate	1
	receptor-mediated endocytosis	1
	RNA processing	1
B0035.14	locomotion	1
	protein folding	1
B0035.16	asparagine biosynthetic process	1
	tRNA processing	1
B0035.4	protein folding	1
B0035.5	embryonic development ending in birth or egg hatching	1
	glucose metabolic process	1
	metabolic process	1
	oxidation reduction	1
	positive regulation of growth rate	1
B0035.7	embryonic development ending in birth or egg hatching	1
	growth	1
	locomotion	1
	nematode larval development	1
	nucleosome assembly	1
	nucleus organization	1
	positive regulation of growth rate	1
	reproduction	1
B0035.8	embryonic development ending in birth or egg hatching	1
	growth	1
	hermaphrodite genitalia development	1
	locomotion	1
	nematode larval development	1
	nucleosome assembly	1
	positive regulation of growth rate	1
	reproduction	1
B0035.9	embryonic development ending in birth or egg hatching	1
	hermaphrodite genitalia development	1
	locomotion	1
	nucleosome assembly	1
	positive regulation of growth rate	1
	receptor-mediated endocytosis	1
	reproduction	1
	secretion by cell	1
	transcription initiation	1
B0041.3	cell wall macromolecule catabolic process	1
	lipid storage	1
B0041.4	determination of adult life span	1
	embryonic development ending in birth or egg hatching	1
	reproduction	1
	translation	1
B0041.5	axon guidance	1
	axonal fasciculation	1
	lipid storage	1
B0041.6	tetrahydrobiopterin biosynthetic process	1
B0041.7	embryonic development ending in birth or egg hatching	1
	gonad development	1
	hermaphrodite genitalia development	1
	morphogenesis of an epithelium	1
	reproduction	1
	vulval development	1
B0205.11	embryonic development ending in birth or egg hatching	1
	translation	1
B0205.3	determination of adult life span	1
	masculinization of hermaphroditic germ-line	1
	protein catabolic process	1
	spermatogenesis	1
	ubiquitin-dependent protein catabolic process	1
B0205.4	carbohydrate metabolic process	1
B0205.6	cellular amino acid metabolic process	1
	cysteine metabolic process	1
	embryonic development ending in birth or egg hatching	1
	growth	1
	metabolic process	1
	nematode larval development	1
	reproduction	1
B0205.7	embryonic development ending in birth or egg hatching	1
	hermaphrodite genitalia development	1
	positive regulation of growth rate	1
	protein amino acid phosphorylation	1
	reproduction	1
	response to hermaphrodite contact	1
	vulval location	1
B0207.12	ion transport	1
	locomotion involved in locomotory behavior	1
	regulation of pharyngeal pumping	1
	response to drug	1
	transport	1
B0207.4	chromosome condensation	1
	chromosome segregation	1
	cytokinesis, completion of separation	1
	embryonic development ending in birth or egg hatching	1
	establishment of protein localization	1
	hermaphrodite genitalia development	1
	locomotion	1
	meiosis	1
	mitosis	1
	mitotic spindle organization	1
	peptidyl-tyrosine phosphorylation	1
	protein amino acid phosphorylation	1
	regulation of contractile ring contraction involved in cytokinesis	1
	reproduction	1
	spindle midzone assembly involved in mitosis	1
B0207.6	embryonic development ending in birth or egg hatching	1
	hermaphrodite genitalia development	1
	locomotion	1
	morphogenesis of an epithelium	1
	oviposition	1
	positive regulation of growth rate	1
	reproduction	1
B0212.5	adaptation of signaling pathway	1
	hyperosmotic response	1
	ion transport	1
	olfactory behavior	1
	olfactory learning	1
	response to mechanical stimulus	1
	sensory perception of smell	1
	transmembrane transport	1
B0213.10	oxidation reduction	1
B0213.11	oxidation reduction	1
B0213.12	oxidation reduction	1
B0213.14	oxidation reduction	1
B0213.15	determination of adult life span	1
	oxidation reduction	1
B0213.16	oxidation reduction	1
B0218.3	cellular response to stress	1
	defense response	1
	defense response to Gram-negative bacterium	1
	determination of adult life span	1
	hyperosmotic response	1
	innate immune response	1
	positive regulation of specific transcription from RNA polymerase II promoter	1
	programmed cell death	1
	protein amino acid phosphorylation	1
B0218.5	lipid storage	1
	protein amino acid phosphorylation	1
B0222.2	phosphate transport	1
B0222.3	phosphate transport	1
B0222.4	carboxylic acid metabolic process	1
	metabolic process	1
B0222.9	oxidation reduction	1
	protein amino acid phosphorylation	1
B0228.5	cell redox homeostasis	1
	determination of adult life span	1
B0228.7	nucleoside metabolic process	1
B0238.10	metabolic process	1
B0240.1	transmembrane transport	1
	transport	1
B0240.4	embryonic development ending in birth or egg hatching	1
B0244.2	embryonic development	1
	exocytosis	1
	positive regulation of neurotransmitter secretion	1
	protein amino acid dephosphorylation	1
B0250.1	embryonic development ending in birth or egg hatching	1
	growth	1
	locomotion	1
	nematode larval development	1
	positive regulation of growth rate	1
	reproduction	1
	translation	1
B0250.5	metabolic process	1
	oxidation reduction	1
	potassium ion transport	1
	valine metabolic process	1
B0252.2	sphingomyelin catabolic process	1
B0252.4	protein folding	1
B0261.1	embryonic development ending in birth or egg hatching	1
	growth	1
	nematode larval development	1
	positive regulation of growth rate	1
	receptor-mediated endocytosis	1
	reproduction	1
B0261.2	box C/D snoRNP assembly	1
	dauer entry	1
	determination of adult life span	1
	embryonic development ending in birth or egg hatching	1
	gonad development	1
	growth	1
	lipid metabolic process	1
	nematode larval development	1
	phosphoinositide phosphorylation	1
	positive regulation of growth rate	1
	positive regulation of translation	1
	regulation of translation	1
	reproduction	1
	response to heat	1
	TOR signaling pathway	1
	translation	1
B0261.4	body morphogenesis	1
	determination of adult life span	1
	embryonic development ending in birth or egg hatching	1
	growth	1
	nematode larval development	1
	positive regulation of growth rate	1
	reproduction	1
	translation	1
B0272.1	embryonic development ending in birth or egg hatching	1
	microtubule-based movement	1
	microtubule-based process	1
	mitosis	1
	pronuclear migration	1
	protein polymerization	1
B0272.2	embryonic development ending in birth or egg hatching	1
B0272.3	fatty acid metabolic process	1
	metabolic process	1
	oxidation reduction	1
	pentose-phosphate shunt	1
B0272.4	metabolic process	1
B0273.2	cell division	1
	cytokinesis	1
	germ cell development	1
	hatching	1
	oogenesis	1
B0273.3	reproduction	1
B0273.4	axon guidance	1
	dendrite development	1
	dorsal/ventral axon guidance	1
	gonad morphogenesis	1
	locomotion	1
	mesodermal cell migration	1
	motor axon guidance	1
	positive regulation of axon extension	1
	positive regulation of locomotion	1
	signal transduction	1
B0280.1	cell death	1
	embryonic development	1
	embryonic development ending in birth or egg hatching	1
	reproduction	1
B0280.12	embryonic development	1
	embryonic development ending in birth or egg hatching	1
	growth	1
	ion transport	1
	nematode larval development	1
	transport	1
B0280.17	cell death	1
	embryonic development	1
	embryonic development ending in birth or egg hatching	1
	reproduction	1
B0280.3	embryonic development	1
	lipid storage	1
	locomotion	1
	pentose-phosphate shunt, non-oxidative branch	1
B0280.9	embryonic development ending in birth or egg hatching	1
	growth	1
	nematode larval development	1
	positive regulation of growth rate	1
	receptor-mediated endocytosis	1
B0281.5	potassium ion transport	1
B0281.6	potassium ion transport	1
B0285.1	body morphogenesis	1
	embryonic development	1
	embryonic development ending in birth or egg hatching	1
	growth	1
	hermaphrodite genitalia development	1
	locomotion	1
	nematode larval development	1
	positive regulation of growth rate	1
	protein amino acid phosphorylation	1
	receptor-mediated endocytosis	1
	reproduction	1
B0285.10	positive regulation of growth rate	1
B0285.4	embryonic development	1
	positive regulation of growth rate	1
B0285.5	axon guidance	1
	axonal fasciculation	1
	embryonic development	1
	glycosaminoglycan biosynthetic process	1
	positive regulation of growth rate	1
	positive regulation of multicellular organism growth	1
B0285.6	citrate transport	1
	embryonic development	1
	sodium ion transport	1
	transmembrane transport	1
B0285.8	embryonic development	1
	lipid storage	1
	positive regulation of growth rate	1
B0285.9	embryonic development	1
	positive regulation of growth rate	1
B0286.2	G-protein coupled receptor protein signaling pathway	1
	neuropeptide signaling pathway	1
B0286.3	'de novo' IMP biosynthetic process	1
	growth	1
	nematode larval development	1
	purine nucleotide biosynthetic process	1
B0286.4	determination of adult life span	1
	embryonic development ending in birth or egg hatching	1
	growth	1
	hermaphrodite genitalia development	1
	lipid storage	1
	locomotion	1
	morphogenesis of an epithelium	1
	nematode larval development	1
	positive regulation of growth rate	1
	positive regulation of multicellular organism growth	1
	receptor-mediated endocytosis	1
	regulation of transcription	1
	reproduction	1
B0286.5	asymmetric cell division	1
	collagen and cuticulin-based cuticle development	1
	gonad development	1
	hermaphrodite genitalia development	1
	male germ-line sex determination	1
	morphogenesis of an epithelium	1
	oviposition	1
	receptor-mediated endocytosis	1
	regulation of transcription	1
	regulation of transcription, DNA-dependent	1
	reproduction	1
B0302.1	protein amino acid phosphorylation	1
B0303.11	embryonic development	1
	transmembrane transport	1
	transport	1
B0303.15	embryonic development ending in birth or egg hatching	1
	growth	1
	nematode larval development	1
	positive regulation of growth rate	1
	receptor-mediated endocytosis	1
	translation	1
B0303.2	embryonic development	1
B0303.3	embryonic development ending in birth or egg hatching	1
	metabolic process	1
B0303.4	embryonic development	1
B0303.7	embryonic development	1
B0303.9	determination of adult life span	1
	embryonic development	1
	vesicle docking during exocytosis	1
	vesicle-mediated transport	1
B0304.1	body morphogenesis	1
	embryonic development ending in birth or egg hatching	1
	locomotion	1
	muscle organ development	1
	nematode larval development	1
	positive regulation of growth rate	1
	positive regulation of transcription from RNA polymerase II promoter	1
	protein heterooligomerization	1
	regulation of transcription	1
	regulation of transcription from RNA polymerase II promoter	1
	reproduction	1
B0304.3	locomotion	1
	oxidation reduction	1
B0331.1	oxidation reduction	1
B0331.2	phosphate transport	1
B0334.5	biosynthetic process	1
	positive regulation of growth rate	1
B0334.6	G-protein coupled receptor protein signaling pathway	1
B0334.8	dauer entry	1
	determination of adult life span	1
	embryonic development ending in birth or egg hatching	1
	learning or memory	1
	phosphoinositide phosphorylation	1
	phosphoinositide-mediated signaling	1
	regulation of chemotaxis	1
	reproduction	1
	signal transduction	1
B0336.10	embryonic development ending in birth or egg hatching	1
	growth	1
	molting cycle, collagen and cuticulin-based cuticle	1
	nematode larval development	1
	reproduction	1
	translation	1
B0336.11	embryonic development	1
B0336.13	embryonic development	1
	transcription initiation from RNA polymerase II promoter	1
B0336.2	embryonic development ending in birth or egg hatching	1
	G-protein coupled receptor protein signaling pathway	1
	hermaphrodite genitalia development	1
	intracellular protein transport	1
	locomotion	1
	morphogenesis of an epithelium	1
	nematode larval development	1
	oocyte development	1
	positive regulation of growth rate	1
	protein transport	1
	reproduction	1
	secretory pathway	1
	small GTPase mediated signal transduction	1
B0336.3	body morphogenesis	1
	embryonic development	1
	positive regulation of growth rate	1
B0336.4	embryonic development	1
B0336.5	embryonic development	1
B0336.6	body morphogenesis	1
	cell migration	1
	determination of adult life span	1
	embryonic development	1
	embryonic development ending in birth or egg hatching	1
	engulfment of apoptotic cell	1
	growth	1
	hermaphrodite genitalia development	1
	locomotion	1
	morphogenesis of an epithelium	1
	nematode larval development	1
	neuron migration	1
	oviposition	1
	positive regulation of growth rate	1
	receptor-mediated endocytosis	1
	reproduction	1
B0336.8	autophagic vacuole formation	1
	determination of adult life span	1
	embryonic development	1
B0336.9	embryonic development	1
	RNA processing	1
B0348.4	dopamine receptor signaling pathway	1
	embryonic development ending in birth or egg hatching	1
	insemination	1
	intracellular signaling cascade	1
	lipid metabolic process	1
	positive regulation of growth rate	1
	positive regulation of locomotion	1
	regulation of locomotion	1
	regulation of oviposition	1
	regulation of pharyngeal pumping	1
	reproduction	1
	signal transduction	1
	spicule insertion	1
B0348.6	embryonic development ending in birth or egg hatching	1
	translational initiation	1
B0350.2	body morphogenesis	1
	carbohydrate metabolic process	1
	dorsal/ventral axon guidance	1
	locomotion	1
	meiosis	1
	positive regulation of growth rate	1
	positive regulation of locomotion	1
	positive regulation of multicellular organism growth	1
	reproduction	1
	signal transduction	1
B0361.10	embryonic development ending in birth or egg hatching	1
	growth	1
	locomotion	1
	nematode larval development	1
	positive regulation of growth rate	1
	receptor-mediated endocytosis	1
	reproduction	1
	vesicle-mediated transport	1
B0361.2	embryonic development	1
	reproduction	1
B0361.5	embryonic development	1
	phospholipid biosynthetic process	1
	positive regulation of growth rate	1
B0361.6	embryonic development	1
	embryonic development ending in birth or egg hatching	1
	growth	1
	nematode larval development	1
	positive regulation of growth rate	1
	receptor-mediated endocytosis	1
B0361.7	embryonic development	1
B0361.8	biosynthetic process	1
	embryonic development	1
	growth	1
	locomotion	1
	nematode larval development	1
	receptor-mediated endocytosis	1
	reproduction	1
B0365.1	cellular carbohydrate metabolic process	1
	metabolic process	1
B0365.3	ATP biosynthetic process	1
	body morphogenesis	1
	cation transport	1
	embryonic development ending in birth or egg hatching	1
	establishment or maintenance of transmembrane electrochemical gradient	1
	growth	1
	metabolic process	1
	monovalent inorganic cation transport	1
	nematode larval development	1
	potassium ion transport	1
	regulation of action potential	1
	regulation of membrane potential	1
	regulation of muscle contraction	1
	reproduction	1
	sodium ion transport	1
	synaptic transmission, cholinergic	1
B0365.6	locomotion	1
	negative regulation of multicellular organism growth	1
	positive regulation of growth rate	1
B0379.4	oviposition	1
B0393.1	embryonic development ending in birth or egg hatching	1
	growth	1
	hermaphrodite genitalia development	1
	molting cycle, collagen and cuticulin-based cuticle	1
	nematode larval development	1
	positive regulation of growth rate	1
	reproduction	1
	translation	1
B0393.2	embryonic development	1
	lipid storage	1
	regulation of Rab GTPase activity	1
B0393.5	cell-matrix adhesion	1
	embryonic development	1
	positive regulation of growth rate	1
B0395.1	cation transport	1
	embryonic development ending in birth or egg hatching	1
	locomotion	1
	positive regulation of growth rate	1
	regulation of pH	1
	sodium ion transport	1
	transmembrane transport	1
B0395.2	determination of adult life span	1
	locomotion	1
B0395.3	locomotion	1
B0399.1	potassium ion transport	1
B0403.2	post-translational protein modification	1
	regulation of protein metabolic process	1
B0403.4	cell redox homeostasis	1
	growth	1
	locomotion	1
	nematode larval development	1
B0410.2	embryonic development ending in birth or egg hatching	1
	multicellular organismal development	1
B0412.1	embryonic development	1
B0412.2	dauer larval development	1
	defense response	1
	embryonic development	1
	growth	1
	lipid storage	1
	positive regulation of transcription from RNA polymerase II promoter	1
	regulation of pharyngeal pumping	1
B0412.3	cellular response to DNA damage stimulus	1
	embryonic development	1
	positive regulation of growth rate	1
B0412.4	body morphogenesis	1
	embryonic development ending in birth or egg hatching	1
	growth	1
	nematode larval development	1
	positive regulation of growth rate	1
	reproduction	1
	translation	1
B0414.2	embryonic development ending in birth or egg hatching	1
	hatching	1
	regulation of transcription, DNA-dependent	1
	reproduction	1
B0414.3	meiosis	1
	meiotic chromosome segregation	1
	nucleosome assembly	1
B0414.5	apoptosis	1
	embryonic development ending in birth or egg hatching	1
	gamete generation	1
	germ cell development	1
	positive regulation of growth rate	1
	reproduction	1
B0414.7	embryonic development ending in birth or egg hatching	1
	protein amino acid phosphorylation	1
	RNA interference	1
B0416.5	positive regulation of growth rate	1
	receptor-mediated endocytosis	1
	reproduction	1
	transmembrane transport	1
B0416.6	protein amino acid N-linked glycosylation	1
B0432.13	positive regulation of multicellular organism growth	1
B0432.2	response to toxin	1
B0432.4	transmembrane transport	1
	transport	1
B0432.5	aromatic amino acid family metabolic process	1
	dopamine biosynthetic process	1
	dopamine metabolic process	1
	habituation	1
	male mating behavior	1
	mechanosensory behavior	1
	oxidation reduction	1
	regulation of locomotion	1
	response to food	1
	turning behavior involved in mating	1
B0432.9	positive regulation of multicellular organism growth	1
B0454.6	amino acid transport	1
	transmembrane transport	1
	transport	1
B0457.1	defecation	1
	embryonic development	1
	G-protein coupled receptor protein signaling pathway	1
	neuropeptide signaling pathway	1
	pharyngeal pumping	1
B0464.1	aspartyl-tRNA aminoacylation	1
	embryonic development ending in birth or egg hatching	1
	growth	1
	nematode larval development	1
	receptor-mediated endocytosis	1
	reproduction	1
	translation	1
	tRNA aminoacylation for protein translation	1
B0464.2	embryonic development ending in birth or egg hatching	1
	growth	1
	nematode larval development	1
	receptor-mediated endocytosis	1
	reproduction	1
B0464.5	cytokinesis	1
	embryonic development ending in birth or egg hatching	1
	gamete generation	1
	germline cell cycle switching, mitotic to meiotic cell cycle	1
	hermaphrodite genitalia development	1
	nematode larval development	1
	protein amino acid phosphorylation	1
	reproduction	1
B0464.6	embryonic development	1
B0464.7	body morphogenesis	1
	chromosome organization	1
	chromosome segregation	1
	embryonic development ending in birth or egg hatching	1
	hermaphrodite genitalia development	1
	locomotion	1
	nucleus organization	1
	reproduction	1
B0464.9	determination of adult life span	1
	embryonic development ending in birth or egg hatching	1
	growth	1
	nematode larval development	1
	reproduction	1
B0478.1	determination of adult life span	1
	hyperosmotic response	1
	JUN phosphorylation	1
	lipopolysaccharide biosynthetic process	1
	protein amino acid phosphorylation	1
	response to heat	1
	response to oxidative stress	1
B0491.1	GPI anchor biosynthetic process	1
B0491.2	body morphogenesis	1
	collagen and cuticulin-based cuticle development	1
	embryonic development ending in birth or egg hatching	1
	negative regulation of multicellular organism growth	1
	positive regulation of growth rate	1
B0491.7	metabolic process	1
	peptidyl-diphthamide biosynthetic process from peptidyl-histidine	1
B0491.8	chloride transport	1
	embryonic development ending in birth or egg hatching	1
	reproduction	1
	transmembrane transport	1
	transport	1
B0495.2	cellular response to DNA damage stimulus	1
	embryonic development ending in birth or egg hatching	1
	positive regulation of growth rate	1
	protein amino acid phosphorylation	1
	reproduction	1
B0495.4	body morphogenesis	1
	cation transport	1
	determination of adult life span	1
	growth	1
	lipid storage	1
	nematode larval development	1
	nutrient import	1
	positive regulation of growth rate	1
	positive regulation of multicellular organism growth	1
	regulation of pH	1
	regulation of pharyngeal pumping	1
	reproduction	1
	sodium ion transport	1
	transmembrane transport	1
B0495.7	locomotion	1
	metabolic process	1
	proteolysis	1
B0496.3	lipopolysaccharide biosynthetic process	1
	protein amino acid phosphorylation	1
B0496.7	cellular process	1
	digestive system process	1
	oviposition	1
B0496.8	determination of adult life span	1
B0511.1	protein folding	1
B0511.10	embryonic development ending in birth or egg hatching	1
	growth	1
	hermaphrodite genitalia development	1
	nematode larval development	1
	receptor-mediated endocytosis	1
	reproduction	1
B0511.12	locomotion	1
B0511.4	protein amino acid phosphorylation	1
B0511.6	determination of adult life span	1
	growth	1
	nematode larval development	1
B0513.2	embryonic development ending in birth or egg hatching	1
B0513.3	translation	1
B0513.5	glutamate biosynthetic process	1
	oxidation reduction	1
	proline catabolic process	1
B0513.9	vesicle-mediated transport	1
B0523.5	body morphogenesis	1
	gonad development	1
B0524.2	embryonic development	1
	lipid metabolic process	1
B0545.1	cellular response to stress	1
	determination of adult life span	1
	embryonic development ending in birth or egg hatching	1
	intracellular signaling cascade	1
	protein amino acid phosphorylation	1
	reproduction	1
B0545.4	embryonic development ending in birth or egg hatching	1
	reproduction	1
B0547.1	cytokinesis	1
	embryonic development ending in birth or egg hatching	1
	gonad development	1
	growth	1
	hermaphrodite genitalia development	1
	nematode larval development	1
	oogenesis	1
	reproduction	1
B0554.5	transmembrane transport	1
B0554.7	lipid storage	1
B0564.1	body morphogenesis	1
	embryonic development ending in birth or egg hatching	1
	gonad development	1
	growth	1
	nematode larval development	1
	positive regulation of growth rate	1
	positive regulation of multicellular organism growth	1
	RNA processing	1
B0564.10	locomotion	1
	positive regulation of transcription from RNA polymerase II promoter	1
	regulation of transcription	1
	regulation of transcription, DNA-dependent	1
BE0003N10.1	mRNA catabolic process	1
	RNA processing	1
BE0003N10.2	intracellular signaling cascade	1
	signal transduction	1
BE10.2	determination of adult life span	1
	embryonic development	1
	fatty acid biosynthetic process	1
	oxidation reduction	1
C01A2.3	embryonic development ending in birth or egg hatching	1
	growth	1
	nematode larval development	1
	positive regulation of growth rate	1
	protein insertion into membrane	1
	receptor-mediated endocytosis	1
C01A2.4	protein transport	1
C01A2.5	body morphogenesis	1
	embryonic development ending in birth or egg hatching	1
	growth	1
	locomotion	1
	nematode larval development	1
	positive regulation of growth rate	1
	receptor-mediated endocytosis	1
C01B10.8	metabolic process	1
C01B10.9	metabolic process	1
C01B12.1	body morphogenesis	1
C01B4.6	carbohydrate metabolic process	1
	hexose metabolic process	1
C01B4.9	transmembrane transport	1
C01B7.4	embryonic development ending in birth or egg hatching	1
	positive regulation of growth rate	1
C01B7.6	apoptosis	1
	body morphogenesis	1
	locomotion	1
	negative regulation of MAPKKK cascade	1
	oviposition	1
	regulation of protein stability	1
	regulation of synapse organization	1
C01C10.3	lipid storage	1
	metabolic process	1
C01C4.3	protein amino acid phosphorylation	1
C01F1.1	determination of adult life span	1
	embryonic development ending in birth or egg hatching	1
	hermaphrodite genitalia development	1
	positive regulation of growth rate	1
	receptor-mediated endocytosis	1
	reproduction	1
C01F1.2	embryonic development ending in birth or egg hatching	1
	growth	1
	hermaphrodite genitalia development	1
	nematode larval development	1
	receptor-mediated endocytosis	1
	reproduction	1
C01F1.3	biosynthetic process	1
	cellular metabolic process	1
	extracellular polysaccharide biosynthetic process	1
	growth	1
	locomotion	1
	metabolic process	1
	nematode larval development	1
	oviposition	1
	steroid biosynthetic process	1
C01F4.2	positive regulation of growth rate	1
	signal transduction	1
C01F6.5	locomotion	1
C01F6.6	determination of adult life span	1
C01F6.8	cell volume homeostasis	1
	chloride transport	1
	embryonic development ending in birth or egg hatching	1
	growth	1
	locomotion	1
	nematode larval development	1
	positive regulation of growth rate	1
	receptor-mediated endocytosis	1
	reproduction	1
C01F6.9	positive regulation of growth rate	1
C01G10.10	proteolysis	1
C01G10.11	axon extension	1
	axonal fasciculation	1
	locomotion	1
	regulation of axon extension	1
C01G10.7	cellular aromatic compound metabolic process	1
C01G10.8	response to stress	1
C01G10.9	cellular biosynthetic process	1
	cellular metabolic process	1
C01G12.5	enterobactin biosynthetic process	1
	folic acid and derivative biosynthetic process	1
	metabolic process	1
	oxidation reduction	1
	positive regulation of growth rate	1
C01G12.8	ATP biosynthetic process	1
	cation transport	1
	metabolic process	1
	monovalent inorganic cation transport	1
C01G5.2	embryonic development ending in birth or egg hatching	1
C01G5.5	embryonic development ending in birth or egg hatching	1
	oxidation reduction	1
C01G5.6	proteolysis	1
C01G6.1	transmembrane transport	1
	transport	1
	water transport	1
C01G6.6	oxidation reduction	1
C01G6.7	metabolic process	1
C01G6.8	axon guidance	1
	carbohydrate metabolic process	1
	cell migration	1
	establishment of neuroblast polarity	1
	hermaphrodite genitalia development	1
	locomotion	1
	protein amino acid phosphorylation	1
	transmembrane receptor protein tyrosine kinase signaling pathway	1
C01G8.2	determination of adult life span	1
	embryonic development ending in birth or egg hatching	1
	regulation of oviposition	1
C01G8.3	cellular metabolic process	1
	metabolic process	1
	oxidation reduction	1
C01G8.4	protein folding	1
C01G8.5	actin filament organization	1
	body morphogenesis	1
	determination of adult life span	1
	embryonic development ending in birth or egg hatching	1
	growth	1
	inductive cell migration	1
	locomotion	1
	morphogenesis of an epithelium	1
	nematode larval development	1
	positive regulation of growth rate	1
	receptor-mediated endocytosis	1
	reproduction	1
	tube lumen formation	1
C01G8.9	body morphogenesis	1
	embryonic development	1
	embryonic development ending in birth or egg hatching	1
	gastrulation	1
	gastrulation with mouth forming first	1
	hermaphrodite genitalia development	1
	morphogenesis of an epithelium	1
	nematode larval development	1
	oviposition	1
	positive regulation of growth rate	1
	receptor-mediated endocytosis	1
	reproduction	1
C01H6.2	growth	1
	hermaphrodite genitalia development	1
	morphogenesis of an epithelium	1
	nematode larval development	1
C01H6.4	metabolic process	1
	oxidation reduction	1
C01H6.5	body morphogenesis	1
	growth	1
	locomotion	1
	molting cycle, collagen and cuticulin-based cuticle	1
	nematode larval development	1
	oviposition	1
	positive regulation of multicellular organism growth	1
	regulation of transcription, DNA-dependent	1
	reproduction	1
C01H6.7	body morphogenesis	1
	embryonic development ending in birth or egg hatching	1
	nematode larval development	1
	positive regulation of growth rate	1
	reproduction	1
C01H6.9	protein amino acid phosphorylation	1
C02B10.1	metabolic process	1
	oxidation reduction	1
C02B10.2	embryonic development ending in birth or egg hatching	1
C02B10.5	body morphogenesis	1
	embryonic development ending in birth or egg hatching	1
	reproduction	1
C02B8.4	oviposition	1
	positive regulation of growth rate	1
	regulation of transcription	1
C02C2.1	embryonic development	1
	metabolic process	1
C02C2.5	embryonic development	1
C02C6.1	cell death	1
	embryonic development	1
	embryonic development ending in birth or egg hatching	1
	endocytosis	1
	engulfment of apoptotic cell	1
	germ cell development	1
	growth	1
	inductive cell migration	1
	locomotion	1
	molting cycle, collagen and cuticulin-based cuticle	1
	nematode larval development	1
	positive regulation of growth rate	1
	receptor-mediated endocytosis	1
	reproduction	1
C02D4.2	dopamine receptor signaling pathway	1
	G-protein coupled receptor protein signaling pathway	1
C02D5.2	embryonic development	1
C02D5.3	embryonic development	1
	metabolic process	1
C02E7.1	ATP biosynthetic process	1
	cation transport	1
	metabolic process	1
	transport	1
C02F12.4	regulation of Rho protein signal transduction	1
C02F4.1	cell migration	1
	engulfment of apoptotic cell	1
	inductive cell migration	1
C02F4.2	chemosensory behavior	1
	chemotaxis	1
	dauer larval development	1
	hyperosmotic response	1
	lipid storage	1
	locomotion	1
	olfactory behavior	1
	olfactory learning	1
	positive regulation of growth rate	1
	positive regulation of multicellular organism growth	1
	regulation of gene expression	1
	thermosensory behavior	1
	thermotaxis	1
C02F5.3	embryonic development	1
	ferrous iron transport	1
C02F5.4	embryonic development	1
	mRNA 3'-end processing	1
	RNA processing	1
C02F5.6	embryonic development	1
C02F5.7	embryonic development	1
C02F5.9	body morphogenesis	1
	determination of adult life span	1
	embryonic development	1
	embryonic development ending in birth or egg hatching	1
	growth	1
	locomotion	1
	nematode larval development	1
	oviposition	1
	proteolysis involved in cellular protein catabolic process	1
	reproduction	1
C02G6.1	proteolysis	1
C02G6.2	proteolysis	1
C02H6.1	protein amino acid glycosylation	1
C02H7.1	chemotaxis	1
	dauer entry	1
	establishment of protein localization	1
	hyperosmotic response	1
	intraflagellar transport	1
	lipid homeostasis	1
	protein complex assembly	1
	reproductive process in a multicellular organism	1
	sensory cilium assembly	1
C02H7.3	defecation	1
	determination of adult life span	1
	mating	1
	oviposition	1
	synaptic transmission	1
C03B8.4	body morphogenesis	1
	growth	1
	hermaphrodite genitalia development	1
	negative regulation of vulval development	1
	nematode larval development	1
	reproduction	1
	vulval development	1
C03C10.1	embryonic development ending in birth or egg hatching	1
	mitotic spindle organization	1
	positive regulation of growth rate	1
	protein amino acid phosphorylation	1
	reproduction	1
C03C10.3	deoxyribonucleoside diphosphate metabolic process	1
	determination of adult life span	1
	embryonic development	1
	embryonic development ending in birth or egg hatching	1
	gamete generation	1
	hermaphrodite genitalia development	1
	morphogenesis of an epithelium	1
	ovulation	1
	oxidation reduction	1
	positive regulation of growth rate	1
	receptor-mediated endocytosis	1
	reproduction	1
C03C10.4	embryonic development	1
C03C11.2	cell fate specification	1
	masculinization of hermaphroditic germ-line	1
	positive regulation of growth rate	1
	receptor-mediated endocytosis	1
	regulation of cell proliferation	1
	regulation of meiosis	1
	reproduction	1
	spermatid development	1
C03D6.3	body morphogenesis	1
	dephosphorylation	1
	determination of adult life span	1
	DNA recombination	1
	DNA repair	1
	DNA replication	1
	embryonic development ending in birth or egg hatching	1
	growth	1
	lipid storage	1
	locomotion	1
	molting cycle, collagen and cuticulin-based cuticle	1
	morphogenesis of an epithelium	1
	mRNA capping	1
	mRNA processing	1
	nematode larval development	1
	positive regulation of growth rate	1
	positive regulation of locomotion	1
	protein amino acid dephosphorylation	1
	receptor-mediated endocytosis	1
	reproduction	1
C03D6.4	embryonic development ending in birth or egg hatching	1
C03D6.5	chromatin assembly or disassembly	1
C03D6.8	body morphogenesis	1
	embryonic development ending in birth or egg hatching	1
	growth	1
	hermaphrodite genitalia development	1
	nematode larval development	1
	positive regulation of growth rate	1
	receptor-mediated endocytosis	1
	reproduction	1
	translation	1
C03E10.4	oligosaccharide biosynthetic process	1
C03F11.1	potassium ion transport	1
C03F11.3	cell adhesion	1
C03G5.1	body morphogenesis	1
	electron transport chain	1
	embryonic development ending in birth or egg hatching	1
	growth	1
	nematode larval development	1
	oviposition	1
	oxidation reduction	1
	positive regulation of growth rate	1
	tricarboxylic acid cycle	1
C03G6.14	oxidation reduction	1
	response to xenobiotic stimulus	1
C03G6.15	oxidation reduction	1
	response to xenobiotic stimulus	1
C03H5.2	carbohydrate transport	1
	cell migration	1
	gonad development	1
	nucleotide-sugar transport	1
	reproduction	1
	transmembrane transport	1
C03H5.4	lipid catabolic process	1
	phospholipid metabolic process	1
C04A11.3	body morphogenesis	1
	growth	1
	locomotion	1
	nematode larval development	1
	positive regulation of growth rate	1
	protein amino acid phosphorylation	1
	reproduction	1
C04A11.4	proteolysis	1
C04A2.1	regulation of Rab GTPase activity	1
C04A2.3	body morphogenesis	1
	cell adhesion	1
	cell fate specification	1
	determination of adult life span	1
	embryonic development ending in birth or egg hatching	1
	epidermis development	1
	growth	1
	locomotion	1
	mesoderm development	1
	morphogenesis of an epithelium	1
	nematode larval development	1
	oviposition	1
	positive regulation of growth rate	1
	regulation of asymmetric cell division	1
	regulation of cell migration	1
	regulation of transcription from RNA polymerase II promoter	1
	regulation of transcription, DNA-dependent	1
	reproduction	1
	tail tip morphogenesis	1
	Wnt receptor signaling pathway	1
C04C3.2	ion transport	1
	transport	1
C04C3.3	embryonic development ending in birth or egg hatching	1
	metabolic process	1
	positive regulation of growth rate	1
C04C3.5	positive regulation of locomotion	1
C04D8.1	asymmetric protein localization	1
	embryonic development	1
	regulation of gastrulation	1
	signal transduction	1
C04E12.12	sensory perception	1
	signal transduction	1
C04F1.3	body morphogenesis	1
	excretion	1
	gonad morphogenesis	1
	head morphogenesis	1
	locomotion	1
	nematode larval development	1
	regulation of transcription	1
	regulation of transcription, DNA-dependent	1
C04F12.10	proteolysis	1
C04F12.3	positive regulation of growth rate	1
	signal transduction	1
C04F12.4	embryonic development ending in birth or egg hatching	1
	growth	1
	molting cycle, collagen and cuticulin-based cuticle	1
	nematode larval development	1
	positive regulation of growth rate	1
	reproduction	1
	translation	1
C04F12.8	dephosphorylation	1
	protein amino acid dephosphorylation	1
C04F5.1	dsRNA transport	1
	RNA interference	1
C04F6.3	carbohydrate metabolic process	1
	chitin catabolic process	1
	chitin metabolic process	1
	embryonic development ending in birth or egg hatching	1
C04F6.4	barbed-end actin filament capping	1
	locomotion	1
	muscle thin filament assembly	1
	negative regulation of actin filament polymerization	1
	nematode larval development	1
	oviposition	1
	positive regulation of actin filament depolymerization	1
	positive regulation of growth rate	1
	positive regulation of locomotion	1
	regulation of locomotion	1
C04G2.6	positive regulation of growth rate	1
	positive regulation of multicellular organism growth	1
	regulation of transcription, DNA-dependent	1
	reproduction	1
C04G2.7	apoptosis	1
	cell fate commitment	1
	defecation	1
	nematode larval development	1
	oviposition	1
	positive regulation of locomotion	1
	regulation of transcription	1
	vulval development	1
C04G6.1	protein amino acid phosphorylation	1
C04G6.10	defense response	1
C04G6.3	cell communication	1
	metabolic process	1
C04G6.7	defense response	1
C04H5.6	developmental growth	1
	embryonic body morphogenesis	1
	embryonic development ending in birth or egg hatching	1
	feminization of hermaphroditic germ-line	1
	germ cell development	1
	growth	1
	hermaphrodite genitalia development	1
	molting cycle, collagen and cuticulin-based cuticle	1
	nematode larval development	1
	positive regulation of growth rate	1
	positive regulation of vulval development	1
	reproduction	1
	transport	1
C05A9.1	transmembrane transport	1
	transport	1
C05B10.1	embryonic development ending in birth or egg hatching	1
	germ cell development	1
	negative regulation of MAP kinase activity	1
	negative regulation of meiotic cell cycle	1
	negative regulation of Ras protein signal transduction	1
	Notch signaling pathway	1
	oocyte development	1
	protein amino acid dephosphorylation	1
	regulation of cell fate specification	1
	regulation of vulval development	1
C05B5.7	embryonic development	1
C05C10.3	ketone body catabolic process	1
	metabolic process	1
C05C10.6	embryonic development ending in birth or egg hatching	1
	positive regulation of growth rate	1
C05C12.3	defecation	1
	growth	1
	ion transport	1
	nematode larval development	1
	positive regulation of growth rate	1
	reproduction	1
	transmembrane transport	1
C05C8.2	body morphogenesis	1
	growth	1
	nematode larval development	1
	oviposition	1
	positive regulation of growth rate	1
C05C8.3	determination of adult life span	1
	protein folding	1
C05C8.6	embryonic development ending in birth or egg hatching	1
	growth	1
	meiosis	1
	meiotic chromosome segregation	1
	nematode larval development	1
C05C8.7	carbohydrate metabolic process	1
	embryonic development ending in birth or egg hatching	1
	growth	1
	nematode larval development	1
	positive regulation of growth rate	1
	reproduction	1
C05C8.9	cilium assembly	1
	foraging behavior	1
C05D10.2	embryonic development	1
	embryonic development ending in birth or egg hatching	1
	growth	1
	nematode larval development	1
	protein amino acid phosphorylation	1
C05D10.3	embryonic development	1
	transport	1
C05D11.10	embryonic development	1
	embryonic development ending in birth or egg hatching	1
	growth	1
	nematode larval development	1
	positive regulation of growth rate	1
	reproduction	1
C05D11.11	embryonic development	1
	embryonic development ending in birth or egg hatching	1
	glycine metabolic process	1
	L-serine metabolic process	1
C05D11.12	body morphogenesis	1
	embryonic development	1
	embryonic development ending in birth or egg hatching	1
	metabolic process	1
	nematode larval development	1
	oxidation reduction	1
	positive regulation of growth rate	1
C05D11.2	body morphogenesis	1
	cell death	1
	determination of adult life span	1
	embryonic development ending in birth or egg hatching	1
	growth	1
	intracellular protein transport	1
	locomotion	1
	nematode larval development	1
C05D11.3	cell redox homeostasis	1
	collagen and cuticulin-based cuticle development	1
	cytokinesis	1
	embryonic development ending in birth or egg hatching	1
	hermaphrodite genitalia development	1
	locomotion	1
	microtubule polymerization	1
	oviposition	1
	pronuclear migration	1
	reproduction	1
C05D11.4	embryonic development	1
	fibroblast growth factor receptor signaling pathway	1
	negative regulation of cell projection organization	1
	nematode larval development	1
	positive regulation of growth rate	1
	regulation of axon extension involved in axon guidance	1
C05D11.5	embryonic development	1
C05D11.6	embryonic development	1
	proteolysis	1
C05D11.7	embryonic development	1
	lipid metabolic process	1
C05D11.8	embryonic development	1
C05D11.9	body morphogenesis	1
	embryonic development	1
	embryonic development ending in birth or egg hatching	1
	growth	1
	nematode larval development	1
	positive regulation of growth rate	1
	receptor-mediated endocytosis	1
	RNA processing	1
	tRNA 5'-leader removal	1
C05D12.1	histidine catabolic process	1
C05D2.1	dauer larval development	1
	defense response to fungus	1
	embryonic development	1
	innate immune response	1
	lipid storage	1
	negative regulation of BMP signaling pathway	1
	nematode larval development	1
	oviposition	1
	positive regulation of BMP signaling pathway	1
	positive regulation of gene-specific transcription elongation from RNA polymerase II promoter	1
	positive regulation of growth rate	1
	positive regulation of multicellular organism growth	1
	positive regulation of transcription from RNA polymerase II promoter	1
	protein amino acid phosphorylation	1
	transmembrane receptor protein serine/threonine kinase signaling pathway	1
C05D9.1	cell communication	1
	embryonic development ending in birth or egg hatching	1
	meiosis	1
	reproduction	1
C05D9.3	cell adhesion	1
	cell-matrix adhesion	1
	integrin-mediated signaling pathway	1
C05D9.5	translational initiation	1
C05E11.1	lipid storage	1
	locomotory behavior	1
	negative regulation of multicellular organism growth	1
	regulation of oviposition	1
	regulation of synapse structure and activity	1
	synaptic vesicle transport	1
C05G5.1	transmembrane transport	1
C05G5.4	metabolic process	1
C05H8.1	calcium-mediated signaling	1
	embryonic development	1
	positive regulation of CREB transcription factor activity	1
	positive regulation of protein kinase activity	1
	protein amino acid phosphorylation	1
	transcription	1
C06A1.1	cell division	1
	collagen and cuticulin-based cuticle development	1
	cytokinesis	1
	DNA recombination	1
	DNA repair	1
	embryonic development ending in birth or egg hatching	1
	endoplasmic reticulum unfolded protein response	1
	locomotion	1
	meiosis	1
	nematode larval development	1
	positive regulation of multicellular organism growth	1
	reproduction	1
C06A1.5	embryonic development ending in birth or egg hatching	1
	receptor-mediated endocytosis	1
	reproduction	1
	transcription, DNA-dependent	1
C06A1.6	DNA repair	1
C06A1.7	DNA repair	1
C06A5.1	body morphogenesis	1
	determination of adult life span	1
	embryonic development	1
	embryonic development ending in birth or egg hatching	1
	gastrulation	1
	gastrulation with mouth forming first	1
	hermaphrodite genitalia development	1
	receptor-mediated endocytosis	1
	reproduction	1
	RNA interference	1
C06A5.11	chromatin silencing	1
	protein amino acid deacetylation	1
	regulation of transcription	1
C06A5.3	hermaphrodite genitalia development	1
	receptor-mediated endocytosis	1
	reproduction	1
C06A6.3	protein catabolic process	1
	receptor-mediated endocytosis	1
C06A6.4	cellular amino acid metabolic process	1
	metabolic process	1
	proteolysis	1
C06A6.5	cell redox homeostasis	1
C06A8.1	methionine metabolic process	1
	oxidation reduction	1
	positive regulation of growth rate	1
C06A8.2	embryonic development ending in birth or egg hatching	1
	growth	1
	hermaphrodite genitalia development	1
	nematode larval development	1
	positive regulation of growth rate	1
	reproduction	1
C06A8.9	transport	1
C06B3.3	oxidation reduction	1
	response to xenobiotic stimulus	1
C06B3.4	determination of adult life span	1
	metabolic process	1
	oxidation reduction	1
C06B3.5	metabolic process	1
	oxidation reduction	1
C06B3.8	cGMP biosynthetic process	1
	cyclic nucleotide biosynthetic process	1
	intracellular signaling cascade	1
C06B8.3	metabolic process	1
	oxidation reduction	1
C06B8.8	growth	1
	hermaphrodite genitalia development	1
	nematode larval development	1
	positive regulation of growth rate	1
	reproduction	1
	translation	1
C06C3.1	embryonic development ending in birth or egg hatching	1
	photosynthesis, light reaction	1
	photosynthetic electron transport in photosystem II	1
	positive regulation of growth rate	1
	receptor-mediated endocytosis	1
	reproduction	1
C06E1.10	determination of adult life span	1
	embryonic development ending in birth or egg hatching	1
	growth	1
	nematode larval development	1
	positive regulation of growth rate	1
	receptor-mediated endocytosis	1
	reproduction	1
	RNA interference	1
C06E1.3	embryonic development	1
	protein transport	1
C06E1.4	embryonic development	1
	feeding behavior	1
	ion transport	1
	ionotropic glutamate receptor signaling pathway	1
	lipid storage	1
	response to mechanical stimulus	1
	sensory perception of bitter taste	1
	transport	1
C06E2.3	post-translational protein modification	1
	regulation of protein metabolic process	1
C06E2.7	post-translational protein modification	1
	regulation of protein metabolic process	1
C06E4.3	enterobactin biosynthetic process	1
	metabolic process	1
	oxidation reduction	1
C06E4.6	enterobactin biosynthetic process	1
	growth	1
	hermaphrodite genitalia development	1
	metabolic process	1
	nematode larval development	1
	oxidation reduction	1
	positive regulation of multicellular organism growth	1
	reproduction	1
C06E7.1	growth	1
	hermaphrodite genitalia development	1
	locomotion	1
	morphogenesis of an epithelium	1
	nematode larval development	1
	one-carbon metabolic process	1
	positive regulation of growth rate	1
	positive regulation of locomotion	1
	receptor-mediated endocytosis	1
	reproduction	1
	secretion by cell	1
C06E7.3	hermaphrodite genitalia development	1
	lipid storage	1
	locomotion	1
	one-carbon metabolic process	1
	positive regulation of growth rate	1
	positive regulation of locomotion	1
	receptor-mediated endocytosis	1
	reproduction	1
	secretion by cell	1
C06G3.10	embryonic development ending in birth or egg hatching	1
	Golgi organization	1
	gonad morphogenesis	1
	growth	1
	hermaphrodite genitalia development	1
	inductive cell migration	1
	nematode larval development	1
	oogenesis	1
	positive regulation of growth rate	1
	protein transport	1
	regulation of cell migration	1
C06G3.11	embryonic development ending in birth or egg hatching	1
	growth	1
	hermaphrodite genitalia development	1
	locomotion	1
	positive regulation of multicellular organism growth	1
C06G3.2	cell division	1
	cytokinesis	1
	embryonic development ending in birth or egg hatching	1
	lipid storage	1
	meiosis	1
	meiotic chromosome segregation	1
	microtubule-based movement	1
C06G3.5	embryonic development ending in birth or egg hatching	1
	purine ribonucleoside monophosphate biosynthetic process	1
C06G3.7	cell redox homeostasis	1
	metabolic process	1
	oxidation reduction	1
C06G4.2	cell death	1
	embryonic development	1
	proteolysis	1
C06G4.5	embryonic development	1
	G-protein coupled receptor protein signaling pathway	1
C06G8.2	oligopeptide transport	1
	transmembrane transport	1
C06G8.3	metal ion transport	1
	transmembrane transport	1
C06H2.1	determination of adult life span	1
	embryonic development ending in birth or egg hatching	1
	growth	1
	hermaphrodite genitalia development	1
	nematode larval development	1
	positive regulation of growth rate	1
	reproduction	1
C06H2.3	cellular response to DNA damage stimulus	1
	metabolic process	1
C06H2.4	transmembrane transport	1
	transport	1
C07A12.3	regulation of transcription, DNA-dependent	1
C07A12.4	body morphogenesis	1
	cell redox homeostasis	1
	embryonic development	1
	embryonic development ending in birth or egg hatching	1
	gastrulation	1
	gastrulation with mouth forming first	1
	growth	1
	locomotion	1
	nematode larval development	1
	positive regulation of growth rate	1
	positive regulation of locomotion	1
C07A12.7	intracellular protein transport	1
C07A4.1	calcium-mediated signaling	1
C07A9.11	embryonic development	1
	transmembrane transport	1
C07A9.2	determination of adult life span	1
	embryonic development ending in birth or egg hatching	1
	growth	1
	hermaphrodite genitalia development	1
	lipid storage	1
	locomotion	1
	nematode larval development	1
	receptor-mediated endocytosis	1
	reproduction	1
C07A9.3	embryonic development	1
	embryonic development ending in birth or egg hatching	1
	positive regulation of multicellular organism growth	1
	protein amino acid phosphorylation	1
	reproduction	1
C07A9.4	embryonic development	1
	transmembrane transport	1
C07A9.8	embryonic development	1
C07B5.5	determination of adult life span	1
	DNA catabolic process, endonucleolytic	1
	DNA fragmentation involved in apoptosis	1
	DNA metabolic process	1
C07D10.2	reproduction	1
C07D10.4	embryonic development ending in birth or egg hatching	1
	positive regulation of multicellular organism growth	1
	proteolysis	1
C07D8.5	oxidation reduction	1
C07D8.6	locomotion	1
	oxidation reduction	1
	pharyngeal pumping	1
C07E3.1	embryonic development	1
	embryonic development ending in birth or egg hatching	1
	growth	1
	hermaphrodite genitalia development	1
	locomotion	1
	nematode larval development	1
	reproduction	1
C07E3.2	embryonic development ending in birth or egg hatching	1
	germline cell cycle switching, mitotic to meiotic cell cycle	1
	growth	1
	lipid storage	1
	nematode larval development	1
	positive regulation of growth rate	1
	receptor-mediated endocytosis	1
	reproduction	1
	RNA interference	1
C07E3.9	lipid catabolic process	1
	phospholipid metabolic process	1
C07F11.1	body morphogenesis	1
	cell surface receptor linked signal transduction	1
	defense response	1
	embryonic development	1
	embryonic development ending in birth or egg hatching	1
	growth	1
	innate immune response	1
	nematode larval development	1
	signal transduction	1
C07G1.1	proteolysis	1
C07G1.3	protein amino acid phosphorylation	1
C07G1.4	axon guidance	1
	epithelial cell migration	1
	morphogenesis of embryonic epithelium	1
	regulation of Arp2/3 complex-mediated actin nucleation	1
C07G1.5	autophagy	1
	body morphogenesis	1
	embryonic development ending in birth or egg hatching	1
	growth	1
	locomotion	1
	molting cycle, collagen and cuticulin-based cuticle	1
	nematode larval development	1
	positive regulation of growth rate	1
	reproduction	1
C07G1.8	cell redox homeostasis	1
C07G2.2	defense response to Gram-negative bacterium	1
	embryonic development	1
	negative regulation of innate immune response	1
	negative regulation of specific transcription from RNA polymerase II promoter	1
	positive regulation of innate immune response	1
	positive regulation of specific transcription from RNA polymerase II promoter	1
	regulation of transcription, DNA-dependent	1
C07G2.3	cellular protein metabolic process	1
	determination of adult life span	1
	embryonic development ending in birth or egg hatching	1
	growth	1
	hermaphrodite genitalia development	1
	locomotion	1
	nematode larval development	1
	positive regulation of growth rate	1
	protein folding	1
	receptor-mediated endocytosis	1
	reproduction	1
C07H4.2	chloride transport	1
	transmembrane transport	1
C07H6.1	DNA recombination	1
	DNA repair	1
	DNA replication	1
	embryonic development	1
	embryonic development ending in birth or egg hatching	1
	meiosis	1
C07H6.2	embryonic development	1
	positive regulation of growth rate	1
C07H6.3	embryonic development	1
	embryonic development ending in birth or egg hatching	1
	mitosis	1
	positive regulation of multicellular organism growth	1
	reproduction	1
C07H6.4	embryonic development	1
	RNA processing	1
C07H6.5	anti-apoptosis	1
	apoptosis	1
	cell death	1
	determination of adult life span	1
	embryonic development ending in birth or egg hatching	1
	gamete generation	1
	germline cell cycle switching, mitotic to meiotic cell cycle	1
	growth	1
	hermaphrodite genitalia development	1
	morphogenesis of an epithelium	1
	mRNA metabolic process	1
	nematode larval development	1
	positive regulation of growth rate	1
	receptor-mediated endocytosis	1
	reproduction	1
C07H6.6	determination of adult life span	1
	DNA damage checkpoint	1
	embryonic development	1
	embryonic development ending in birth or egg hatching	1
	mutagenesis	1
	reproduction	1
	response to UV	1
	response to X-ray	1
	telomere maintenance	1
C07H6.7	anterior/posterior pattern formation	1
	axon guidance	1
	cell migration	1
	embryonic development	1
	locomotion	1
	negative regulation of vulval development	1
	oviposition	1
	plasma membrane fusion	1
	positive regulation of growth rate	1
	positive regulation of vulval development	1
	Ras protein signal transduction	1
	regulation of cell division	1
	regulation of cell fate specification	1
	regulation of transcription	1
	regulation of transcription, DNA-dependent	1
	turning behavior involved in mating	1
	vulval development	1
C07H6.8	positive regulation of growth rate	1
C08A9.1	axon extension	1
	determination of adult life span	1
	growth	1
	nematode larval development	1
	oxidation reduction	1
	superoxide metabolic process	1
C08B11.1	cell division	1
	cyclin catabolic process	1
	cytokinesis	1
	determination of anterior/posterior axis, embryo	1
	embryonic development	1
	embryonic development ending in birth or egg hatching	1
	hermaphrodite genitalia development	1
	meiosis	1
	meiotic anaphase II	1
	sister chromosome movement towards spindle pole during meiosis II	1
C08B11.3	body morphogenesis	1
	embryonic development ending in birth or egg hatching	1
	growth	1
	hermaphrodite genitalia development	1
	nematode larval development	1
	receptor-mediated endocytosis	1
C08B11.5	embryonic development ending in birth or egg hatching	1
	hermaphrodite genitalia development	1
	locomotion	1
	reproduction	1
C08B11.6	body morphogenesis	1
	embryonic development ending in birth or egg hatching	1
	meiosis	1
	meiotic chromosome segregation	1
C08B11.7	determination of adult life span	1
	embryonic development ending in birth or egg hatching	1
	growth	1
	nematode larval development	1
	ubiquitin-dependent protein catabolic process	1
C08B6.1	carbohydrate metabolic process	1
	lipid glycosylation	1
	metabolic process	1
C08B6.9	embryonic development ending in birth or egg hatching	1
	growth	1
	metabolic process	1
	nematode larval development	1
	oogenesis	1
	positive regulation of embryonic development	1
	protein sumoylation	1
C08C3.3	anterior/posterior pattern formation	1
	embryonic development	1
	localization	1
	negative regulation of transcription from RNA polymerase II promoter	1
	positive regulation of epithelial cell proliferation	1
	regulation of cell fate specification	1
	regulation of cell migration	1
	regulation of transcription	1
	regulation of transcription, DNA-dependent	1
	tail tip morphogenesis	1
C08D8.1	transmembrane transport	1
C08E8.2	biosynthetic process	1
C08F11.8	carbohydrate metabolic process	1
	lipid glycosylation	1
	metabolic process	1
C08F8.1	body morphogenesis	1
	embryonic development ending in birth or egg hatching	1
	hermaphrodite genitalia development	1
	locomotion	1
	microtubule nucleation	1
	positive regulation of growth rate	1
	positive regulation of multicellular organism growth	1
	protein folding	1
	reproduction	1
C08F8.2	embryonic development ending in birth or egg hatching	1
	growth	1
	nematode larval development	1
	positive regulation of growth rate	1
	receptor-mediated endocytosis	1
	reproduction	1
C08F8.6	protein amino acid phosphorylation	1
C08F8.7	ferrous iron transport	1
	intracellular protein transport	1
	nucleocytoplasmic transport	1
	protein transport	1
	signal transduction	1
	small GTPase mediated signal transduction	1
C08F8.8	cell migration	1
	determination of adult life span	1
	gonad morphogenesis	1
	hermaphrodite genitalia development	1
	locomotion	1
	positive regulation of growth rate	1
	positive regulation of multicellular organism growth	1
	positive regulation of transcription from RNA polymerase II promoter	1
	regulation of transcription, DNA-dependent	1
	reproduction	1
C08G5.4	transport	1
C08H9.1	proteolysis	1
C08H9.2	body morphogenesis	1
	embryonic development ending in birth or egg hatching	1
	growth	1
	hermaphrodite genitalia development	1
	locomotion	1
	nematode larval development	1
	oviposition	1
	positive regulation of growth rate	1
	positive regulation of locomotion	1
	reproduction	1
C08H9.3	DNA repair	1
	embryonic development ending in birth or egg hatching	1
	growth	1
	hermaphrodite genitalia development	1
	nematode larval development	1
	reproduction	1
C08H9.5	determination of adult life span	1
	positive regulation of growth rate	1
	protein amino acid phosphorylation	1
C09B7.1	G-protein coupled receptor protein signaling pathway	1
C09B8.1	epidermal growth factor receptor signaling pathway	1
	inositol phosphate-mediated signaling	1
	ovulation	1
	phosphoinositide dephosphorylation	1
	positive regulation of growth rate	1
C09B8.6	response to heat	1
C09B8.7	axon guidance	1
	protein amino acid phosphorylation	1
C09D1.1	carbohydrate metabolic process	1
	locomotion	1
	muscle thick filament assembly	1
	myosin filament assembly	1
	protein amino acid phosphorylation	1
	regulation of Rho protein signal transduction	1
	vascular endothelial growth factor receptor signaling pathway	1
C09D4.1	axonal fasciculation	1
	locomotion	1
	transmembrane transport	1
C09D4.5	determination of adult life span	1
	embryonic development	1
	embryonic development ending in birth or egg hatching	1
	growth	1
	nematode larval development	1
	reproduction	1
	translation	1
C09D8.1	body morphogenesis	1
	dephosphorylation	1
	embryonic development ending in birth or egg hatching	1
	epidermis development	1
	gastrulation	1
	positive regulation of growth rate	1
	protein amino acid dephosphorylation	1
	reproduction	1
	synaptogenesis	1
C09E10.2	activation of protein kinase C activity by G-protein coupled receptor protein signaling pathway	1
	dopamine receptor signaling pathway	1
	intracellular signaling cascade	1
	negative regulation of locomotion	1
	regulation of locomotion	1
	regulation of oviposition	1
	response to food	1
	serotonin receptor signaling pathway	1
	signal transduction	1
	synaptic transmission, cholinergic	1
C09E7.5	embryonic development	1
C09E7.7	embryonic development	1
C09E7.8	embryonic development	1
C09E7.9	embryonic development	1
C09F5.2	embryonic development	1
	reproduction	1
C09F5.3	embryonic development	1
C09F9.3	glutamine metabolic process	1
C09G12.1	regulation of transcription	1
	regulation of transcription, DNA-dependent	1
C09G12.8	axon extension involved in axon guidance	1
	axon guidance	1
	axon regeneration	1
	body morphogenesis	1
	cell migration	1
	dorsal/ventral axon guidance	1
	engulfment of apoptotic cell	1
	growth	1
	hermaphrodite genitalia development	1
	inductive cell migration	1
	intracellular protein transport	1
	morphogenesis of an epithelium	1
	motor axon guidance	1
	nematode larval development	1
	neuron migration	1
	neuron projection morphogenesis	1
	nucleocytoplasmic transport	1
	positive regulation of vulval development	1
	protein transport	1
	signal transduction	1
	small GTPase mediated signal transduction	1
C09G12.9	embryonic development ending in birth or egg hatching	1
	nematode larval development	1
	protein catabolic process	1
	protein modification process	1
	protein transport	1
	receptor-mediated endocytosis	1
C09G4.1	aging	1
	ceramide biosynthetic process	1
	gene expression	1
C09G4.2	protein amino acid phosphorylation	1
	reproduction	1
C09G4.3	cell cycle	1
	embryonic development ending in birth or egg hatching	1
	meiosis	1
	mitosis	1
C09G4.5	embryonic development ending in birth or egg hatching	1
	nematode larval development	1
	reproduction	1
C09G5.1	ion transport	1
	taxis	1
	transport	1
C09G5.2	collagen and cuticulin-based cuticle development	1
C09G5.3	collagen and cuticulin-based cuticle development	1
C09G5.4	collagen and cuticulin-based cuticle development	1
C09G5.5	collagen and cuticulin-based cuticle development	1
C09G5.6	asexual sporulation	1
	collagen and cuticulin-based cuticle development	1
	embryonic development ending in birth or egg hatching	1
	locomotion	1
	molting cycle, collagen and cuticulin-based cuticle	1
	nematode larval development	1
	reproduction	1
C09G5.8	lipid storage	1
C09G9.6	oocyte development	1
	protein catabolic process	1
	reproduction	1
C09H10.2	embryonic development ending in birth or egg hatching	1
	growth	1
	hermaphrodite genitalia development	1
	molting cycle, collagen and cuticulin-based cuticle	1
	nematode larval development	1
	positive regulation of multicellular organism growth	1
	reproduction	1
	translation	1
C09H10.3	cellular respiration	1
	dauer exit	1
	defecation	1
	determination of adult life span	1
	embryonic development ending in birth or egg hatching	1
	embryonic morphogenesis	1
	gonad development	1
	growth	1
	inductive cell migration	1
	lipid storage	1
	mitochondrial electron transport, NADH to ubiquinone	1
	mitochondrial respiratory chain complex assembly	1
	nematode larval development	1
	oxidation reduction	1
	pharyngeal pumping	1
	positive regulation of growth rate	1
	positive regulation of multicellular organism growth	1
	reproduction	1
	response to drug	1
C09H10.6	oviposition	1
C09H5.2	ATP biosynthetic process	1
	cation transport	1
	metabolic process	1
	oviposition	1
C09H6.2	asymmetric protein localization	1
	nerve-nerve synaptic transmission	1
	positive regulation of vulval development	1
	receptor clustering	1
	sensory perception of touch	1
C09H6.3	anterior/posterior axon guidance	1
	dorsal/ventral axon guidance	1
	embryonic development ending in birth or egg hatching	1
	oviposition	1
	reproduction	1
C10C5.3	cellular amino acid metabolic process	1
	metabolic process	1
	proteolysis	1
C10C5.4	cellular amino acid metabolic process	1
	metabolic process	1
	proteolysis	1
C10C5.5	cellular amino acid metabolic process	1
	metabolic process	1
	proteolysis	1
C10C5.6	dauer larval development	1
	determination of adult life span	1
	gonad development	1
C10C6.1	embryonic development ending in birth or egg hatching	1
	protein amino acid phosphorylation	1
	reproduction	1
C10C6.2	G-protein coupled receptor protein signaling pathway	1
	hermaphrodite genitalia development	1
	locomotion	1
	positive regulation of locomotion	1
[truncated: 22,428 more rows]

## Sheet: B) bp-focused report
Count of Gene ID
GO Term	Gene ID	Total
'de novo' IMP biosynthetic process	B0286.3	1
	F10F2.2	1
	F38B6.4	1
'de novo' IMP biosynthetic process Total		3
'de novo' pyrimidine base biosynthetic process	C25F6.3	1
	D2085.1	1
	T07C4.1	1
	W02D3.2	1
'de novo' pyrimidine base biosynthetic process Total		4
10-formyltetrahydrofolate catabolic process	F36H1.6	1
10-formyltetrahydrofolate catabolic process Total		1
21U-RNA metabolic process	D2030.6	1
21U-RNA metabolic process Total		1
acetylcholine biosynthetic process	ZC416.8	1
acetylcholine biosynthetic process Total		1
acetylcholine catabolic process	W09B12.1	1
	Y110A7A.3	1
	Y44E3A.2	1
	Y48B6A.8	1
acetylcholine catabolic process Total		4
acetylcholine catabolic process in synaptic cleft	W09B12.1	1
	Y44E3A.2	1
	Y48B6A.8	1
acetylcholine catabolic process in synaptic cleft Total		3
acetylcholine secretion	F01D4.4	1
	W08D2.4	1
acetylcholine secretion Total		2
acetylcholine transport	JC8.10	1
	ZC416.8	1
acetylcholine transport Total		2
actin cytoskeleton organization	C46H11.11	1
	D2024.6	1
	F11H8.4	1
	F45E10.1	1
	F56E10.2	1
	F58B6.2	1
	K03E6.6	1
	M03F4.2	1
	M106.5	1
	M6.3	1
	T04C12.5	1
	T04C12.6	1
	T22D2.1	1
	Y18D10A.20	1
	Y48G9A.4	1
actin cytoskeleton organization Total		15
actin filament bundle formation	ZK1010.3	1
actin filament bundle formation Total		1
actin filament depolymerization	C38C3.5	1
actin filament depolymerization Total		1
actin filament organization	C01G8.5	1
	R06C1.3	1
	Y105E8A.26	1
	Y106G6E.5	1
actin filament organization Total		4
actin filament polymerization	C35D10.16	1
actin filament polymerization Total		1
actin filament severing	K06A4.3	1
actin filament severing Total		1
actin filament-based process	F26D11.11	1
	T04C12.4	1
	T04C12.5	1
actin filament-based process Total		3
activation of adenylate cyclase activity by dopamine receptor signaling pathway	C52B11.3	1
	F15A8.5	1
activation of adenylate cyclase activity by dopamine receptor signaling pathway Total		2
activation of adenylate cyclase activity by G-protein signaling pathway	C13B9.4	1
activation of adenylate cyclase activity by G-protein signaling pathway Total		1
activation of JUN kinase activity	F35C8.3	1
	K08A8.1	1
activation of JUN kinase activity Total		2
activation of MAPK activity	F13B10.1	1
	F42G10.2	1
	K08A8.1	1
activation of MAPK activity Total		3
activation of MAPKK activity	F33E2.2	1
activation of MAPKK activity Total		1
activation of protein kinase C activity by G-protein coupled receptor protein signaling pathway	C09E10.2	1
	C34C6.5	1
	F42A9.1	1
	F46H6.2	1
	F52C9.3	1
	F54G8.2	1
	K06A1.6	1
	T10B11.2	1
activation of protein kinase C activity by G-protein coupled receptor protein signaling pathway Total		8
acyl-CoA metabolic process	C17C3.1	1
	C17C3.3	1
	C31H5.6	1
	C37H5.13	1
	F25E2.3	1
	K05B2.4	1
	T05E7.1	1
	W03D8.8	1
	Y87G2A.2	1
acyl-CoA metabolic process Total		9
adaptation of signaling pathway	B0212.5	1
	C40H5.5	1
adaptation of signaling pathway Total		2
adenine salvage	T19B4.3	1
adenine salvage Total		1
ADP catabolic process	R07E4.4	1
ADP catabolic process Total		1
adult behavior	ZC395.2	1
adult behavior Total		1
adult locomotory behavior	Y53G8B.4	1
adult locomotory behavior Total		1
age-dependent response to oxidative stress	C15F1.7	1
age-dependent response to oxidative stress Total		1
aging	C09G4.1	1
	C15F1.7	1
aging Total		2
alanyl-tRNA aminoacylation	F28H1.3	1
	W02B12.6	1
alanyl-tRNA aminoacylation Total		2
alcohol metabolic process	C34C6.4	1
alcohol metabolic process Total		1
amine transport	T23G5.5	1
amine transport Total		1
amino acid transport	B0454.6	1
	C50D2.2	1
	F07C3.7	1
	F23F1.6	1
	F27C8.1	1
	F52H2.2	1
amino acid transport Total		6
anatomical structure morphogenesis	F29G9.4	1
	T22B7.1	1
	W03F8.5	1
anatomical structure morphogenesis Total		3
anion transport	C18E9.6	1
	F52B5.1	1
	F52D10.1	1
	F57F10.1	1
	R03E9.3	1
	R05G6.7	1
anion transport Total		6
anterior/posterior axis specification	W01B6.1	1
anterior/posterior axis specification Total		1
anterior/posterior axon guidance	C09H6.3	1
	W01B6.1	1
	Y54G2A.25	1
anterior/posterior axon guidance Total		3
anterior/posterior pattern formation	C07H6.7	1
	C08C3.3	1
	F14F3.1	1
	F29B9.6	1
	F31E3.1	1
	W02A11.4	1
	Y54G2A.1	1
	Y75B8A.2	1
anterior/posterior pattern formation Total		8
anterograde axon cargo transport	C52E12.2	1
anterograde axon cargo transport Total		1
anti-apoptosis	C07H6.5	1
	T04A11.6	1
anti-apoptosis Total		2
apical protein localization	F10F2.1	1
	F35H12.3	1
	T20F10.1	1
apical protein localization Total		3
apoptosis	B0414.5	1
	C01B7.6	1
	C04G2.7	1
	C07H6.5	1
	C10E2.3	1
	C14A4.2	1
	C32C4.7	1
	C34C6.5	1
	C41D11.8	1
	C48D1.2	2
	C49A1.4	1
	C55B7.1	1
	C56C10.8	1
	F08B4.1	1
	F13B9.8	1
	F23B12.8	1
	F26E4.11	1
	F29F11.2	1
	F32A6.3	1
	F42G8.4	1
	F46F3.4	1
	F54G8.4	1
	F56F11.3	1
	F57B10.11	1
	H14N18.1	1
	K02F2.6	1
	K02F3.5	1
	K06B9.5	1
	M79.1	1
	R03D7.6	1
	R05D3.4	1
	R06F6.1	1
	R13A5.1	1
	T04H1.4	1
	T12E12.4	1
	T21G5.3	1
	T21H3.3	1
	Y116A8C.34	1
	Y41E3.9	1
	Y43C5A.6	1
	Y47H9C.6	1
	Y48E1B.13	1
	Y67D8C.5	1
	Y73B6BL.7	1
	ZK512.3	1
	ZK909.4	1
apoptosis Total		47
apoptotic cell clearance	C14A4.4	1
	CD4.2	1
	F53F10.4	1
	F56F11.3	1
	T21H3.3	1
apoptotic cell clearance Total		5
apoptotic mitochondrial changes	T12E12.4	1
apoptotic mitochondrial changes Total		1
arginyl-tRNA aminoacylation	C29H12.1	1
	F26F4.10	1
arginyl-tRNA aminoacylation Total		2
aromatic amino acid family biosynthetic process	Y38F1A.6	1
aromatic amino acid family biosynthetic process Total		1
aromatic amino acid family metabolic process	B0432.5	1
	C31H2.4	1
	D1053.1	1
	F42D1.2	1
	K08F8.4	1
	K10C2.4	1
	T21C12.2	1
	Y53G8B.1	1
	Y71F9AL.5	1
	ZK1290.2	1
aromatic amino acid family metabolic process Total		10
Arp2/3 complex-mediated actin nucleation	K07C5.1	1
	M01B12.3	1
	Y71F9AL.16	1
Arp2/3 complex-mediated actin nucleation Total		3
asexual sporulation	C09G5.6	1
asexual sporulation Total		1
asparagine biosynthetic process	B0035.16	1
	F25G6.6	1
	M02D8.4	1
	M106.4	1
	M18.3	1
asparagine biosynthetic process Total		5
asparaginyl-tRNA aminoacylation	F22D6.3	1
asparaginyl-tRNA aminoacylation Total		1
aspartyl-tRNA aminoacylation	B0464.1	1
	F10C2.6	1
	F22D6.3	1
	T02G5.9	1
	Y66D12A.23	1
aspartyl-tRNA aminoacylation Total		5
associative learning	B0034.3	1
	C40H5.5	1
associative learning Total		2
asymmetric cell division	B0286.5	1
	C27A2.6	1
	F36A4.7	1
	F43G9.11	1
	F52F12.3	1
	F54E7.3	1
	H02I12.8	1
	K04G2.8	1
	M03A1.6	1
	W03G1.6	1
	W06F12.1	1
	W08D2.1	1
	Y17G9B.3	1
	Y59A8B.14	1
	ZK909.4	1
asymmetric cell division Total		15
asymmetric protein localization	C04D8.1	1
	C09H6.2	1
	C56G7.1	1
	F26H9.6	1
	F54E7.3	1
	Y54G11A.10	1
	ZK520.4	1
	ZK524.1	1
asymmetric protein localization Total		8
asymmetric protein localization involved in cell fate determination	C16B8.1	1
	F38E1.7	1
	F49E11.1	1
	F52F12.3	1
	H39E23.1	1
	K09H11.3	1
	M117.2	1
	T07H6.2	1
	T19E10.1	1
	W06F12.1	1
	Y59A8B.14	1
	Y75B7AL.4	1
asymmetric protein localization involved in cell fate determination Total		12
ATP biosynthetic process	B0365.3	1
	C01G12.8	1
	C02E7.1	1
	C09H5.2	1
	C10C6.6	1
	C17E4.9	1
	F02C9.3	1
	F36H2.1	1
	F55F3.3	1
	H06H21.10	1
	K07E3.7	1
	K11D9.2	1
	R05C11.3	1
	T24H7.5	1
	W08D2.5	1
	W09C2.3	1
	W09D10.2	1
	Y105E8A.12	1
	Y49E10.11	1
	Y59H11AR.2	1
	Y67D8C.10	1
	Y76A2A.2	1
	ZK256.1	1
ATP biosynthetic process Total		23
ATP hydrolysis coupled proton transport	F49C12.13	1
ATP hydrolysis coupled proton transport Total		1
ATP metabolic process	C34E10.6	1
	F20B6.2	1
	F38B2.4	1
	H28O16.1	1
	Y110A7A.12	1
	Y49A3A.2	1
ATP metabolic process Total		6
ATP synthesis coupled electron transport	F45H10.3	1
	Y45G12B.1	1
ATP synthesis coupled electron transport Total		2
ATP synthesis coupled proton transport	C17H12.14	1
	C17H12.9	1
	C26H9A.1	1
	C30F8.2	1
	C34E10.6	1
	C53B7.4	1
	F02E8.1	1
	F20B6.2	1
	F27C1.7	1
	F32D1.2	1
	F35G12.10	1
	F35H10.4	1
	F49C12.13	1
	F52E1.10	1
	F55H2.2	1
	F58F12.1	1
	H28O16.1	1
	K07A12.3	1
	R10E11.2	1
	R10E11.8	1
	T01H3.1	1
	T14F9.1	1
	VW02B12L.1	1
	Y110A7A.12	1
	Y116A8C.36	1
	Y38F2AL.3	1
	Y38F2AL.4	1
	Y49A3A.2	1
	Y69A2AR.18	1
	Y82E9BR.3	1
	ZK637.8	1
	ZK970.4	1
ATP synthesis coupled proton transport Total		32
ATP-dependent chromatin remodeling	F37A4.8	1
ATP-dependent chromatin remodeling Total		1
attachment of spindle microtubules to kinetochore	R12B2.4	1
attachment of spindle microtubules to kinetochore Total		1
attachment of spindle microtubules to kinetochore during mitosis	Y110A7A.1	1
attachment of spindle microtubules to kinetochore during mitosis Total		1
autophagic vacuole formation	B0336.8	1
	C32D5.9	1
autophagic vacuole formation Total		2
autophagy	C07G1.5	1
	C32D5.9	1
	F41E6.13	1
	M7.5	1
	T19E7.3	1
	Y60A3A.1	1
	Y71G12B.12	1
autophagy Total		7
axon extension	C01G10.11	1
	C08A9.1	1
	C18C4.10	1
	C27D11.1	1
	C30A5.7	1
	C35C5.4	1
	F15C11.1	1
	F28B12.2	1
	F41C6.1	1
	F55C7.7	1
	K11G9.4	1
	T19B4.7	1
	T24B8.6	1
	Y37D8A.13	1
	Y50D4C.1	1
	Y60A3A.1	1
	ZK792.6	1
axon extension Total		17
axon extension involved in axon guidance	C09G12.8	1
	C35C5.4	1
	C47G2.2	1
	EEED8.9	1
	K03D3.10	1
	T21B6.1	1
	T27C10.6	1
axon extension involved in axon guidance Total		7
axon extension involved in development	K03D10.1	1
axon extension involved in development Total		1
axon guidance	B0041.5	1
	B0273.4	1
	B0285.5	1
	C01G6.8	1
	C07G1.4	1
	C07H6.7	1
	C09B8.7	1
	C09G12.8	1
	C34F6.4	1
	C35C5.4	1
	C53D6.2	1
	C55B7.9	1
	D1007.1	1
	EEED8.9	1
	F10E9.6	1
	F15A2.6	1
	F22E12.4	1
	F25F2.2	1
	F28D1.10	1
	F28F9.1	1
	F34H10.1	1
	F41C6.1	1
	F45E10.1	1
	F56A11.1	1
	F57C7.3	1
	K03D3.10	1
	K07E3.8	1
	K07G5.1	1
	K08C9.7	1
	K11C4.3	1
	K11G9.4	1
	K12F2.2	1
	M03A1.1	1
	M6.3	1
	R06C1.3	1
	R13A5.5	1
	R13F6.4	1
	T08H4.3	1
	T19B4.7	1
	T21G5.5	1
	T27A1.6	1
	Y105E8B.9	1
	Y34B4A.3	1
	Y37D8A.13	1
	Y38F1A.10	1
	Y47G6A.20	1
	Y50D4C.1	1
	Y54G11A.13	1
	Y54G11A.6	1
	Y60A3A.1	1
	Y71G12B.20	1
	Y74C9A.3	1
	Y95B8A.10	1
	ZK377.2	1
	ZK524.2	1
	ZK721.2	1
axon guidance Total		56
axon regeneration	C09G12.8	1
	F10E9.6	1
	Y50D4C.1	1
axon regeneration Total		3
axonal defasciculation	K08C7.3	1
axonal defasciculation Total		1
axonal fasciculation	B0041.5	1
	B0285.5	1
	C01G10.11	1
	C09D4.1	1
	C24G7.1	1
	C24H11.9	1
	C32F10.5	1
	C34E10.7	1
	C34F6.4	1
	C41D11.2	1
	C55B7.9	1
	F10E7.4	1
	F11C3.3	1
	F20G4.3	1
	F25F2.2	1
	F34H10.1	1
	F39B2.4	1
	F42H11.2	1
	F46F11.9	1
	F47G4.7	1
	F54G8.3	1
	F55C7.7	1
	F57C7.3	1
	K08C9.7	1
	K11C4.3	1
	R05D3.7	1
	R13A5.5	1
	R13F6.4	1
	T05E8.3	1
	T07A5.2	1
	T08H4.3	1
	T12F5.4	1
	T19B4.7	1
	T21G5.5	1
	T22E5.5	1
	T23B3.4	1
	T23H4.3	1
	W02B9.1	1
	W03D8.8	1
	Y105E8A.23	1
	Y105E8B.9	1
	Y106G6H.8	1
	Y37D8A.13	1
	Y47G6A.20	1
	Y47G6A.23	1
	Y47G6A.29	1
	Y48G8AL.8	1
	Y56A3A.2	1
	Y65B4BR.4	1
	Y71G12B.20	1
	Y76A2A.2	1
	Y95B8A.7	1
	ZC247.3	1
	ZC581.9	1
	ZK1128.5	1
	ZK867.1	1
axonal fasciculation Total		56
axonogenesis	C40H5.5	1
	F42E11.4	1
	K03E6.1	1
	M03A1.1	1
	Y60A3A.1	1
axonogenesis Total		5
backward locomotion	C53D6.2	1
	F42E11.4	1
	F45E10.1	1
backward locomotion Total		3
barbed-end actin filament capping	C04F6.4	1
	K06A4.3	1
barbed-end actin filament capping Total		2
base-excision repair	R10E4.5	1
	Y56A3A.29	1
base-excision repair Total		2
behavior	C30A5.7	1
behavior Total		1
behavioral response to ethanol	Y51A2D.19	1
behavioral response to ethanol Total		1
beta-lactam antibiotic catabolic process	C18C4.2	1
beta-lactam antibiotic catabolic process Total		1
biological_process	K02A4.1	1
biological_process Total		1
bioluminescence	T08B1.3	1
bioluminescence Total		1
biosynthetic process	B0334.5	1
	B0361.8	1
	C01F1.3	1
	C08E8.2	1
	C12C8.2	1
	C14E2.2	1
	C14F11.1	1
	C15F1.4	1
	C23H3.4	1
	C32F10.8	1
	C41A3.1	1
	C42C1.5	1
	C44E4.3	1
	C47B2.6	1
	C53B4.7	1
	D1081.9	1
	D2085.1	1
	D2085.6	1
	D2096.4	1
	F08C6.2	1
	F09E5.2	1
	F10G8.9	1
	F22B8.6	1
	F25B5.6	1
	F26H9.4	1
	F27D9.6	1
	F28A10.10	1
	F28H6.3	1
	F32H2.5	1
	F36H1.6	1
	F38B6.4	1
	F42D1.2	1
	F43H9.2	1
	F47B10.2	1
	F53B1.4	1
	F56H6.5	1
	F57B9.4	1
	F57C2.5	1
	M106.4	1
	R03A10.4	1
	R05H10.2	1
	R102.4	1
	R11D1.11	1
	T01C8.4	1
	T01C8.5	1
	T04A11.1	1
	T04A11.2	1
	T04A11.4	1
	T04A11.5	1
	T04F3.1	1
	T12G3.4	1
	T14D7.1	1
	T22G5.5	1
	T23F2.1	1
	T25B9.1	1
	T26A5.4	1
	W06B3.1	1
	Y104H12D.3	1
	Y18H1A.11	1
	Y37E3.11	1
	Y46G5A.31	1
	Y47D9A.1	1
	Y65B4A.8	1
	Y66H1B.4	1
	Y6B3B.11	1
	ZC8.1	1
	ZK1127.10	1
biosynthetic process Total		67
body morphogenesis	B0035.10	1
	B0035.11	1
	B0261.4	1
	B0285.1	1
	B0304.1	1
	B0336.3	1
	B0336.6	1
	B0350.2	1
	B0365.3	1
	B0412.4	1
	B0464.7	1
	B0491.2	1
	B0495.4	1
	B0523.5	1
	B0564.1	1
	C01A2.5	1
	C01B12.1	1
	C01B7.6	1
	C01G8.5	1
	C01G8.9	1
	C01H6.5	1
	C01H6.7	1
	C02B10.5	1
	C02F5.9	1
	C03B8.4	1
	C03D6.3	1
	C03D6.8	1
	C03G5.1	1
	C04A11.3	1
	C04A2.3	1
	C04F1.3	1
	C05C8.2	1
	C05D11.12	1
	C05D11.2	1
	C05D11.9	1
	C06A5.1	1
	C07A12.4	1
	C07F11.1	1
	C07G1.5	1
	C08B11.3	1
	C08B11.6	1
	C08F8.1	1
	C08H9.2	1
	C09D8.1	1
	C09G12.8	1
	C10C6.5	1
	C10H11.9	1
	C11H1.3	1
	C12C8.3	1
	C14A4.1	1
	C14A4.11	1
	C15A11.1	1
	C15H9.6	1
	C16A3.8	1
	C17E4.9	1
	C18A3.5	1
	C18A3.8	1
	C24H12.5	1
	C25A1.11	1
	C25A1.9	1
	C26C6.1	1
	C26D10.2	1
	C27A2.6	1
	C27D11.1	1
	C27F2.10	1
	C27F2.8	1
	C27H6.2	1
	C29E4.1	1
	C29F4.1	1
	C29F9.7	1
	C30C11.4	1
	C32D5.2	1
	C32E8.5	1
	C32F10.2	1
	C32F10.5	1
	C33D9.1	1
	C33H5.12	1
	C33H5.9	1
	C34F11.9	1
	C36F7.1	1
	C37A2.4	1
	C41C4.6	1
	C41G7.2	1
	C42D8.8	1
	C45B2.7	1
	C47D12.1	1
	C48A7.1	1
	C48E7.2	1
	C49A1.4	1
	C54D1.5	1
	C55A6.9	1
	C55B7.9	1
	C56C10.3	1
	C56C10.8	1
	D1007.5	1
	D1043.1	1
	D1081.2	1
	D2013.2	1
	D2013.5	1
	D2013.7	1
	D2085.3	1
	D2096.8	1
	DY3.2	1
	E01A2.4	1
	E01B7.1	1
	EEED8.7	1
	EGAP7.1	1
	F02A9.6	1
	F02E8.3	1
	F07A11.6	1
	F07A5.7	1
	F07B7.5	1
	F08B4.5	1
	F08C6.7	1
	F08D12.1	1
	F08G2.3	1
	F09E5.1	1
	F10C1.2	1
	F10C5.1	1
	F10E7.4	1
	F11A10.5	1
	F11C1.6	1
	F11C3.3	1
	F11G11.10	1
	F11G11.12	1
	F13D11.2	1
	F14D12.2	1
	F16B4.8	1
	F16D3.4	1
	F16F9.2	1
	F17E9.12	1
	F18C12.2	1
	F18C5.2	1
	F18H3.5	1
	F20D12.2	1
	F21C3.5	1
	F22B3.2	1
	F22B5.1	1
	F22B5.2	1
	F22B5.7	1
	F22D6.4	1
	F23F1.8	1
	F25B3.6	1
	F25B4.6	1
	F25D7.3	1
	F25E2.4	1
	F26A3.3	1
	F26B1.7	1
	F26D10.3	1
	F27C1.2	1
	F27C1.8	1
	F27E5.2	1
	F28C1.2	1
	F28D1.10	1
	F29D11.1	1
	F30B5.1	1
	F31C3.5	1
	F31E3.1	1
	F32A5.1	1
	F32A5.7	1
	F32B5.8	1
	F32D1.10	1
	F33D4.1	1
	F33H1.3	1
	F35H10.4	1
	F36A4.10	1
	F36H1.2	1
	F37B4.2	1
	F38E1.7	1
	F39B2.6	1
	F39H11.2	1
	F39H11.3	1
	F40F8.10	1
	F41H10.11	1
	F42A8.2	1
	F42E11.4	1
	F42G9.7	1
	F43G9.1	1
	F44A6.2	1
	F45E1.6	1
	F46C8.6	1
	F46E10.9	1
	F46F11.9	1
	F46F2.2	1
	F46F3.1	1
	F47A4.2	1
	F47D12.4	1
	F47F6.1	1
	F49B2.6	1
	F49C12.11	1
	F49D11.1	1
	F49E11.1	1
	F52B10.1	1
	F52C9.7	1
	F52E10.5	1
	F52H3.1	1
	F53A2.7	1
	F53A2.8	1
	F53A3.7	1
	F53G12.3	1
	F53H8.1	1
	F54C9.4	1
	F54C9.5	1
	F54C9.9	1
	F54D5.11	1
	F54D8.1	1
	F54E12.1	1
	F54E7.2	1
	F54E7.3	1
	F54G8.3	1
	F55A8.1	1
	F55C10.2	1
	F55C10.3	1
	F55F8.4	1
	F55G1.2	1
	F56A11.1	1
	F56C11.1	1
	F56D1.4	1
	F56H6.5	1
	F57B10.1	1
	F57H12.1	1
	F59E10.1	1
	H06I04.4	1
	H06O01.1	1
	H20J04.5	1
	H24G06.1	1
	H27M09.4	1
	K01C8.10	1
	K01C8.9	1
	K01H12.2	1
	K02A11.1	1
	K02B12.1	1
	K02F2.2	1
	K03B4.3	1
	K03E5.3	1
	K03H1.2	1
	K04D7.2	1
	K04F10.4	1
	K04G2.1	1
	K04G2.8	1
	K04G7.11	1
	K05C4.6	1
	K07A12.3	1
	K08A8.2	1
	K08B12.5	1
	K08C7.3	1
	K08E3.6	1
	K09A9.1	1
	K09H9.3	1
	K10B2.1	1
	K10B2.5	1
	K10B3.10	1
	K10G9.3	1
	K12C11.2	1
	K12D12.3	1
	K12F2.1	1
	M01E11.6	1
	M01E5.5	1
	M03A1.1	1
	M05B5.5	1
	M106.5	1
	M110.4	1
	M142.1	1
	M142.4	1
	M28.5	1
	M6.1	1
	R01E6.3	1
	R02D3.3	1
	R02D3.5	1
	R03C1.3	1
	R05D3.7	1
	R06A4.4	1
	R06C1.3	1
	R06C7.5	1
	R06F6.1	1
	R06F6.2	1
	R07E4.6	1
	R07E5.1	1
	R07G3.1	1
	R08C7.3	1
	R09B3.5	1
	R107.8	1
	R11A5.1	1
	R11A5.7	1
	R11A8.2	1
	R12B2.1	1
	R12C12.2	1
	R12E2.2	1
	R13A5.5	1
	R13A5.8	1
	R13F6.4	1
	R13G10.1	1
	R144.7	1
	R144.9	1
	R155.1	1
	R160.1	1
	R31.1	1
	R53.4	1
	R53.6	1
	R74.1	1
	T01B7.7	1
	T01D1.2	1
	T01G9.6	1
	T02G5.7	1
	T02G5.9	1
	T02H6.11	1
	T04A8.7	1
	T05A1.2	1
	T05E11.5	1
	T06D8.8	1
	T07F8.4	1
	T07H6.3	1
	T08B2.10	1
	T08B2.9	1
	T10C6.13	1
	T10E10.1	1
	T10E10.2	1
	T10E10.5	1
	T10E10.6	1
	T10F2.3	1
	T11F9.9	1
	T12A2.7	1
	T12D8.1	1
	T13H5.4	1
	T14B4.6	1
	T16H12.4	1
	T17E9.1	1
	T20B12.8	1
	T22A3.5	1
	T22A3.8	1
	T22D2.1	1
	T23D8.1	1
	T23F2.1	1
	T24A11.1	1
	T24B8.7	1
	T24H7.1	1
	T25D3.2	1
	T25E12.10	1
	T25G3.3	1
	T26A5.9	1
	T26G10.1	1
	T27C4.4	1
	T27F7.3	1
	T28C6.4	1
	T28C6.6	1
	T28F12.2	1
	T28F12.3	1
	VC5.4	1
	VW02B12L.1	1
	W01A8.4	1
	W02B12.2	1
	W02B9.1	1
	W02H5.4	1
	W03C9.3	1
	W04A4.5	1
	W04A8.7	1
	W05B2.1	1
	W05B2.5	1
	W05B2.6	1
	W05E10.3	1
	W06B4.3	1
	W08D2.4	1
	W08F4.8	1
	W09C2.1	1
	W09G10.4	1
	W10D5.3	1
	W10D9.5	1
	W10G6.3	1
	Y105E8B.1	1
	Y105E8B.2	1
	Y106G6E.6	1
	Y106G6H.2	1
	Y106G6H.7	1
	Y110A7A.4	1
	Y111B2A.15	1
	Y113G7B.18	1
	Y116A8C.32	1
	Y19D10A.16	1
	Y32F6A.3	1
	Y34D9A.4	1
	Y37D8A.9	1
	Y37E11AM.1	1
	Y39A1A.22	1
	Y39A1B.3	1
	Y39E4B.1	1
	Y39G10AR.8	1
	Y39H10A.7	1
	Y40B1A.4	1
	Y41C4A.10	1
	Y41E3.2	1
	Y43H11AL.3	1
	Y46G5A.31	1
	Y47D3B.10	1
	Y47D3B.5	1
	Y47D3B.7	1
	Y47G6A.18	1
	Y47H9C.7	1
	Y48G8AL.14	1
	Y49F6B.1	1
	Y51A2D.15	1
	Y52B11A.9	1
	Y54E10A.15	1
	Y54E2A.11	1
	Y54E5B.3	1
	Y56A3A.20	1
	Y59A8B.1	1
	Y60A3A.1	1
	Y62F5A.1	1
	Y63D3A.5	1
	Y65B4A.1	1
	Y65B4A.3	1
	Y65B4BR.5	1
	Y65B4BR.8	1
	Y66H1B.2	1
	Y69A2AR.32	1
	Y71G12B.11	1
	Y71G12B.14	1
	Y71H2AM.17	1
	Y71H2B.3	1
	Y75B8A.2	1
	Y76B12C.7	1
	Y77E11A.13	1
	Y79H2A.11	1
	Y80D3A.2	1
	Y80D3A.5	1
	ZC504.4	1
	ZC518.2	1
	ZC581.1	1
	ZK1098.5	1
	ZK1127.5	1
	ZK1127.9	1
	ZK1128.5	1
	ZK1151.1	1
	ZK1248.2	1
	ZK131.2	1
	ZK131.3	1
	ZK131.7	1
	ZK177.6	1
	ZK430.8	1
	ZK550.4	1
	ZK637.7	1
	ZK669.1	1
	ZK742.1	1
	ZK792.6	1
	ZK836.1	1
	ZK858.4	1
	ZK858.7	1
	ZK863.6	1
	ZK970.2	1
	ZK970.3	1
body morphogenesis Total		450
box C/D snoRNP assembly	B0261.2	1
	C27H6.2	1
box C/D snoRNP assembly Total		2
branched chain family amino acid metabolic process	K02A4.1	1
	Y44A6D.5	1
branched chain family amino acid metabolic process Total		2
branching morphogenesis of a nerve	K02E10.8	1
branching morphogenesis of a nerve Total		1
C-terminal protein amino acid methylation	F21F3.3	1
	M01E11.1	1
C-terminal protein amino acid methylation Total		2
cadmium ion transmembrane transport	W09D6.6	1
cadmium ion transmembrane transport Total		1
calcium ion homeostasis	F40E10.3	1
calcium ion homeostasis Total		1
calcium ion transport	C10G8.5	1
	C48A7.1	1
	C54D2.5	1
	F33D4.2	1
	K11C4.5	1
	K11D9.2	1
	R05C11.3	1
	R06B10.4	1
	T02C5.5	1
	T28F2.5	1
	W09C2.3	1
	W10C8.1	1
	Y113G7A.4	1
	Y67D8C.10	1
	Y71A12B.4	1
	ZC168.1	1
	ZC21.2	1
	ZK256.1	1
calcium ion transport Total		18
calcium-mediated signaling	C05H8.1	1
	C07A4.1	1
	F54E7.7	1
	F59C12.2	1
calcium-mediated signaling Total		4
carbohydrate biosynthetic process	C34F6.4	1
	F07A11.2	1
	F22B3.4	1
	K08F8.3	1
	T12G3.8	1
	Y34B4A.3	1
carbohydrate biosynthetic process Total		6
carbohydrate metabolic process	AC3.7	1
	AC3.8	1
	B0205.4	1
	B0350.2	1
	C01B4.6	1
	C01G6.8	1
	C04F6.3	1
	C05C8.7	1
	C08B6.1	1
	C08F11.8	1
	C09D1.1	1
	C10H11.3	1
	C10H11.4	1
	C10H11.5	1
	C10H11.6	1
	C13D9.9	1
	C14C11.3	1
	C17G1.3	1
	C18C4.3	1
	C29E4.10	1
	C32C4.7	1
	C33A12.6	1
	C33C12.3	1
	C33C12.8	1
	C33G3.4	1
	C35A5.2	1
	C38C6.2	1
	C44C1.2	1
	C44H9.1	1
	C47B2.6	1
	C49A9.8	1
	C50B6.7	1
	C50D2.7	1
	C50F7.10	1
	C55B6.1	1
	D2096.3	1
	E02H9.5	1
	F01D4.1	1
	F01D4.2	1
	F07A11.2	1
	F07A5.7	1
	F08F8.7	1
	F09G2.6	1
	F10D2.11	1
	F10D2.2	1
	F10D2.5	1
	F10D2.6	1
	F10D2.7	1
	F11E6.1	1
	F13D12.2	1
	F14B4.2	1
	F19B6.1	1
	F20C5.1	1
	F20H11.3	1
	F21D5.1	1
	F22B3.4	1
	F26D10.9	1
	F26D11.1	1
	F29F11.2	1
	F31C3.3	1
	F31F4.7	1
	F32A7.5	1
	F35H8.6	1
	F39G3.1	1
	F40F9.6	1
	F46E10.10	1
	F47G4.3	1
	F48C1.1	1
	F52D1.1	1
	F55D10.1	1
	F57B9.2	1
	F58H1.1	1
	H22K11.2	1
	H23L24.5	1
	H23N18.1	1
	H23N18.2	1
	H23N18.3	1
	H23N18.4	1
	K04A8.10	1
	K07A3.1	1
	K08B4.3	1
	K08B4.4	1
	K10B3.6	1
	K11H3.1	1
	M88.1	1
	R05F9.12	1
	R05F9.6	1
	R06A4.8	1
	R07B7.11	1
	R08D7.7	1
	R10D12.12	1
	R10E11.4	1
	R11F4.1	1
	T01G5.2	1
	T03F6.3	1
	T04A8.7	1
	T05H10.7	1
	T14F9.3	1
	T19B10.3	1
	T19H12.1	1
	T19H12.10	1
	T19H12.11	1
	T19H12.9	1
	T22C8.2	1
	T22F3.3	1
	T25B9.7	1
	T25C8.1	1
	W02B12.11	1
	W03G11.3	1
	Y105E8B.9	1
	Y19D10A.16	1
	Y24D9A.8	1
	Y37E11AR.5	1
	Y39A1C.4	1
	Y39G10AR.6	1
	Y43F4B.5	1
	Y49C4A.8	1
	Y4C6B.6	1
	Y51F10.5	1
	Y57G11C.3	1
	Y70D2A.2	1
	Y73E7A.7	1
	ZC443.5	1
	ZC443.6	1
	ZC455.4	1
	ZC455.5	1
	ZC455.6	1
	ZK632.4	1
carbohydrate metabolic process Total		128
carbohydrate phosphorylation	M01D7.4	1
carbohydrate phosphorylation Total		1
carbohydrate transport	C03H5.2	1
	C29H12.2	1
	F15B10.1	1
	F49C12.6	1
	M02B1.1	1
	W02D3.4	1
	ZK370.7	1
	ZK896.9	1
carbohydrate transport Total		8
carbon utilization	T13C5.8	1
carbon utilization Total		1
carboxylic acid metabolic process	B0222.4	1
	C14H10.3	1
	K01C8.3	1
	K08H10.4	1
	Y104H12D.3	1
	Y37D8A.23	1
	Y66H1B.4	1
	ZK1290.12	1
carboxylic acid metabolic process Total		8
carnitine biosynthetic process	D2089.5	1
	M05D6.7	1
carnitine biosynthetic process Total		2
catecholamine metabolic process	H13N06.6	1
catecholamine metabolic process Total		1
cation transport	AH6.2	1
	B0365.3	1
	B0395.1	1
	B0495.4	1
	C01G12.8	1
	C02E7.1	1
	C09H5.2	1
	C10C6.6	1
	C14F5.4	1
	C15B12.7	1
	C41C4.10	1
	C47D12.3	1
	C54F6.13	1
	F14B8.1	1
	F37H8.4	1
	F41E7.1	1
	F41E7.2	1
	F57C7.2	1
	F57G8.5	1
	F58E1.6	1
	K07E3.7	1
	K07H8.2	1
	K09C8.1	1
	K11D9.2	1
	R05C11.3	1
	R13A1.4	1
	T01H8.5	1
	T04F8.1	1
	T18D3.3	1
	W08D2.5	1
	W09C2.3	1
	Y105E8A.12	1
	Y105E8A.3	1
	Y18D10A.6	1
	Y39E4A.2	1
	Y59H11AR.2	1
	Y67D8C.10	1
	Y6E2A.9	1
	Y71H2AM.9	1
	ZC395.3	1
	ZK185.2	1
	ZK256.1	1
	ZK822.3	1
cation transport Total		43
cell adhesion	C03F11.3	1
	C04A2.3	1
	C05D9.3	1
	C25F6.4	1
	C28A5.4	1
	C36B1.1	1
	C54D1.5	1
	F02G3.1	1
	F07A5.3	1
	F08B4.2	1
	F11C1.3	1
	F11D5.3	1
	F15B9.7	1
	F18F11.3	1
	F25F2.2	1
	F26D11.11	1
	F47C12.1	1
	F54F2.1	1
	F54G8.3	1
	K08C7.3	1
	R05H10.6	1
	R07B1.3	1
	R10F2.1	1
	R13H4.4	1
	T22A3.8	1
	W02B9.1	1
	Y23H5A.5	1
	Y43F4A.1	1
	Y49E10.20	1
	Y71D11A.1	1
	Y76A2B.6	1
	ZC101.2	1
	ZC477.9	1
	ZK1058.2	1
cell adhesion Total		34
cell communication	C04G6.3	1
	C05D9.1	1
	C10G8.5	1
	C29F3.2	1
	F13E9.1	1
	F17H10.3	1
	F25H2.2	1
	F39B1.1	1
	F55C5.7	1
	T05C12.10	1
	W06D4.5	1
	Y113G7A.4	1
	Y116A8C.26	1
	Y37A1B.2	1
	Y48E1B.14	1
	Y59A8B.22	1
	ZC168.1	1
	ZK1290.12	1
	ZK377.1	1
	ZK678.5	1
cell communication Total		20
cell cycle	C09G4.3	1
	F18C5.2	1
	F23C8.9	1
	F32A11.2	1
	F53G2.7	1
	W09C5.2	1
	Y39H10A.7	1
	Y50E8A.4	1
	Y71G12B.27	1
	ZK637.11	1
cell cycle Total		10
cell cycle arrest	D2096.11	1
	M116.5	1
	T05A6.2	1
	Y41E3.9	1
	Y74C9A.5	1
	ZK1151.1	1
cell cycle arrest Total		6
cell death	B0280.1	1
	B0280.17	1
	C02C6.1	1
	C05D11.2	1
	C06G4.2	1
	C07H6.5	1
	C41D11.8	1
	C48D1.2	1
	F17C8.1	1
	F21F8.3	1
	F21F8.7	1
	F26H9.6	1
	F32A6.3	1
	F46F3.4	1
	H22K11.1	1
	K04C2.4	1
	LLC1.1	1
	M57.2	1
	R06F6.2	1
	R12H7.2	1
	T08G5.5	1
	T18H9.2	1
	T19E7.3	1
	W03C9.3	1
	W06B4.3	1
	Y18D10A.17	1
	Y39B6A.20	1
	Y47H10A.1	1
	Y56A3A.32	1
	Y57G11C.10	1
	Y75B8A.24	1
	Y77E11A.10	1
	Y77E11A.11	1
cell death Total		33
cell differentiation	F02A9.6	1
	F33A8.1	1
	F38A6.1	1
	K02B12.1	1
	R107.8	1
	W03A3.1	1
	Y59A8B.14	1
cell differentiation Total		7
cell division	B0035.12	1
	B0273.2	1
	C06A1.1	1
	C06G3.2	1
	C08B11.1	1
	C14B9.4	1
	C17G10.4	1
	C25A1.9	1
	C25D7.6	1
	C26D10.1	1
	C29A12.3	1
	C32E8.8	1
	C32F10.5	1
	C33H5.4	1
	C37A2.4	1
	C38D4.3	1
	C39E9.14	1
	C41C4.8	1
	C41G7.2	1
	C45G3.1	1
	C50F2.3	1
	D1081.8	1
	D2045.6	1
	F07A11.2	1
	F09G2.4	1
	F10C2.4	1
	F11A10.8	1
	F18E2.3	1
	F22B3.4	1
	F22B5.7	1
	F26E4.1	1
	F26H9.6	1
	F30F8.8	1
	F31E3.3	1
	F32D1.10	1
	F33D11.10	1
	F35G12.8	1
	F49E11.1	1
	F53A2.4	1
	F53G12.1	1
	F54B3.3	1
	F54C9.8	1
	F58A4.4	1
	F58A4.8	1
	F59E12.2	1
	H02I12.8	1
	H31G24.4	1
	K06A5.7	1
	K07A1.2	1
	K07C11.2	1
	K07F5.13	1
	K08B4.1	1
	K08E3.6	1
	K09H11.3	1
	K12D12.1	1
	M01A10.3	1
	M01E11.6	1
	M03A1.6	1
	M03D4.1	1
	PAR2.4	1
	R06C7.8	1
	R10E4.4	1
	R12B2.4	1
	T01G9.5	1
	T06E6.2	1
	T20B12.8	1
	T21E12.4	1
	T22B7.1	1
	T22D1.10	1
	T22D1.4	1
	T22F3.3	1
	T24C4.5	1
	T24D1.1	1
	W01B6.9	1
	W02D9.1	1
	W03D2.4	1
	Y110A2AL.14	1
	Y17G9B.3	1
	Y43E12A.1	1
	Y45F10A.2	1
	Y50D4C.4	1
	Y65B4A.6	1
	Y73B3A.5	1
	Y73B6BL.38	1
	Y75B7AL.4	1
	ZC168.4	1
	ZC434.4	1
	ZK1127.5	1
	ZK1127.7	1
	ZK328.2	1
	ZK632.1	1
	ZK742.1	1
cell division Total		92
cell fate commitment	C04G2.7	1
	F14F3.1	1
	F35G12.6	1
	F59A6.1	1
	K11G9.4	1
	T23D8.8	1
	T28D6.9	1
	VF36H2L.1	1
cell fate commitment Total		8
cell fate commitment involved in pattern specification	VF36H2L.1	1
	ZC434.6	1
cell fate commitment involved in pattern specification Total		2
cell fate determination	T05C12.6	1
	T14G8.1	1
cell fate determination Total		2
cell fate specification	C03C11.2	1
	C04A2.3	1
	C27A2.6	1
	C37E2.5	1
	DY3.7	1
	F02A9.6	1
	F02E9.4	1
	F13B9.5	1
	F28B12.3	1
	F29G9.4	1
	F35H12.3	1
	F47D12.4	1
	F53G12.5	1
	F55A8.1	1
	K04G2.8	1
	K07A1.11	1
	K07A1.12	1
	K08B4.1	1
	K10B4.6	1
	M05B5.5	1
	M117.2	1
	R107.8	1
	R11E3.6	1
	T19E7.2	1
	T22B7.1	1
	T27A1.6	1
	W03A3.1	1
	W03G1.6	1
	Y73B6A.5	1
	ZC247.3	1
	ZC64.4	1
cell fate specification Total		31
cell fate specification involved in pattern specification	F38A6.1	1
	T05C12.6	1
	W01B6.1	1
cell fate specification involved in pattern specification Total		3
cell growth	C18D11.2	1
	F57B10.11	1
cell growth Total		2
cell killing	F46C3.1	1
	T27A3.6	1
cell killing Total		2
cell migration	B0336.6	1
	C01G6.8	1
	C02F4.1	1
	C03H5.2	1
	C07H6.7	1
	C08F8.8	1
	C09G12.8	1
	C10H11.9	1
	C14F5.5	1
	C35C5.4	1
	F10E9.6	1
	F18E9.5	1
	F25H8.3	1
	F29D11.1	1
	F31E3.1	1
	F38A3.2	1
	F55C7.7	1
	F58A3.2	1
	K03D3.10	1
	K05C4.6	1
	K08C7.3	1
	K12F2.2	1
	M110.5	1
	R06C1.3	1
	R07G3.1	1
	R13F6.4	1
	R13H4.4	1
	R144.4	1
	R166.4	1
	T05C12.6	1
	T19E10.1	1
	T21E3.3	1
	T21H3.3	1
	T24D1.1	1
	T28F12.2	1
	T28F12.3	1
	W02B9.1	1
	W08D2.1	1
	Y106G6E.5	1
	Y41D4B.13	1
	Y50D4C.1	1
	Y51H4A.3	1
	Y60A3A.1	1
	Y74C9A.3	1
	ZC101.2	1
	ZC504.4	1
	ZK1058.2	1
cell migration Total		47
cell migration involved in gastrulation	T05H4.14	1
cell migration involved in gastrulation Total		1
cell morphogenesis	C12C8.1	1
	C15H9.6	1
	C30C11.4	1
	C33D9.1	1
	C37C3.6	1
	C37H5.8	1
	F11F1.1	1
	F26D10.3	1
	F43E2.8	1
	F44E5.4	1
	F44E5.5	1
	F54C9.2	1
	T14G8.3	1
	T24H7.2	1
cell morphogenesis Total		14
cell projection assembly	M04F3.5	1
	R11G1.4	1
cell projection assembly Total		2
cell proliferation	K01G5.2	1
	K06A5.7	1
	R13A5.12	1
	Y48G1A.5	1
cell proliferation Total		4
cell redox homeostasis	B0024.9	1
	B0228.5	1
	B0403.4	1
	C05D11.3	1
	C06A6.5	1
	C06G3.7	1
	C07A12.4	1
	C07G1.8	1
	C14B1.1	1
	C14B9.2	1
	C30H6.8	1
	C30H7.2	1
	C32D5.8	1
	C35B1.5	1
	C35C5.3	1
	C35D10.10	1
	C46F11.2	1
	C56C10.13	1
	D2063.3	1
	F17B5.1	1
	F20D6.11	1
	F28H7.4	1
	F29B9.5	1
	F35G2.1	1
	F42G8.7	1
	F46E10.9	1
	F47B7.2	1
	F56G4.5	1
	H06O01.1	1
	K02H11.6	1
	K10F12.4	1
	LLC1.3	1
	M01H9.1	1
	R05H5.3	1
	R11A8.5	1
	T10H10.2	1
	T20D4.7	1
	T28A11.13	1
	Y17G7B.7	1
	Y34D9A.6	1
	Y44E3A.3	1
	Y47H9C.5	1
	Y49E10.2	1
	Y49E10.4	1
	Y52E8A.3	1
	Y54E10A.3	1
	Y55F3AR.2	1
	Y73B6BL.12	1
	ZK121.1	1
	ZK637.10	1
	ZK973.11	1
cell redox homeostasis Total		51
cell surface receptor linked signal transduction	C07F11.1	1
	F27E11.3	1
	M02A10.3	1
	T23D8.1	1
cell surface receptor linked signal transduction Total		4
cell volume homeostasis	C01F6.8	1
cell volume homeostasis Total		1
cell wall macromolecule catabolic process	B0041.3	1
	F43G9.2	1
	F52E1.13	1
cell wall macromolecule catabolic process Total		3
cell-cell adhesion	R13A5.5	1
	T04B2.2	1
	Y37D8A.13	1
cell-cell adhesion Total		3
cell-cell adhesion mediated by integrin	F54G8.3	1
cell-cell adhesion mediated by integrin Total		1
cell-cell junction assembly	F26D11.11	1
cell-cell junction assembly Total		1
cell-cell junction maintenance	T22D2.1	1
cell-cell junction maintenance Total		1
cell-cell junction organization	C25A11.4	1
	F14D12.2	1
	W03D8.6	1
cell-cell junction organization Total		3
cell-cell signaling	C26G2.1	1
	K02E10.8	1
	T13C5.1	1
	W03A5.4	1
cell-cell signaling Total		4
cell-cell signaling involved in cell fate specification	F13B10.1	1
	R107.8	1
cell-cell signaling involved in cell fate specification Total		2
cell-matrix adhesion	B0393.5	1
	C05D9.3	1
	C47E8.7	1
	F54D1.6	1
	F54F3.1	1
	F54H5.4	1
	K03H1.5	1
	R09E10.5	1
	ZK1058.2	1
cell-matrix adhesion Total		9
cellular aldehyde metabolic process	T05H4.13	1
	T08B1.3	1
cellular aldehyde metabolic process Total		2
cellular amino acid and derivative metabolic process	F42D1.2	1
	K01C8.3	1
cellular amino acid and derivative metabolic process Total		2
cellular amino acid biosynthetic process	C31C9.2	1
	K02F2.2	1
	T22H6.2	1
cellular amino acid biosynthetic process Total		3
cellular amino acid metabolic process	B0205.6	1
	C06A6.4	1
	C10C5.3	1
	C10C5.4	1
	C10C5.5	1
	C12C8.2	1
	C14E2.2	1
	C14F11.1	1
	C27A7.5	1
	C33F10.14	1
	C44E4.3	1
	D1054.13	1
	D2085.1	1
	F22B8.6	1
	F28H6.3	1
	F42D1.2	1
	F43H9.2	1
	R03A10.4	1
	R102.4	1
	R12C12.1	1
	T01C8.4	1
	T01C8.5	1
	T01H8.2	1
	ZK1127.10	1
	ZK829.4	1
cellular amino acid metabolic process Total		25
cellular aromatic compound metabolic process	C01G10.7	1
	F25H5.3	1
	ZK593.1	1
cellular aromatic compound metabolic process Total		3
cellular biosynthetic process	C01G10.9	1
	R151.2	1
cellular biosynthetic process Total		2
cellular calcium ion homeostasis	C13B9.4	1
	K11C4.5	1
	K11D9.2	1
	W09C2.3	1
cellular calcium ion homeostasis Total		4
cellular carbohydrate metabolic process	B0365.1	1
	D1005.1	1
	F13D12.2	1
	F20H11.3	1
	F46E10.10	1
	T20G5.2	1
cellular carbohydrate metabolic process Total		6
cellular component organization	C46H11.11	1
	F11H8.4	1
	F56E10.2	1
	F58B6.2	1
	H37A05.1	1
	T21H8.1	1
	Y48G9A.4	1
cellular component organization Total		7
cellular homeostasis	C34F6.4	1
cellular homeostasis Total		1
cellular iron ion homeostasis	C54F6.14	1
	D1037.3	1
	F59G1.7	1
	ZK455.1	1
cellular iron ion homeostasis Total		4
cellular lipid metabolic process	F56F11.3	1
cellular lipid metabolic process Total		1
cellular metabolic process	C01F1.3	1
	C01G10.9	1
	C01G8.3	1
	C15H11.4	1
	C33F10.14	1
	C41A3.1	1
	C47B2.6	1
	C53B4.7	1
	D1054.8	1
	D2096.4	1
	F08F3.4	1
	F11A3.2	1
	F28H7.2	1
	F32A5.8	1
	F53B1.4	1
	F56H6.5	1
	K10H10.3	1
	R01H2.5	1
	R08H2.1	1
	T01G6.1	1
	T01G6.10	1
	T03F6.1	1
	T11F9.11	1
	Y47H9C.7	1
	Y53G8AL.2	1
	Y6B3B.11	1
	Y71H10A.2	1
	ZC449.6	1
	ZC8.1	1
	ZK1098.4	1
cellular metabolic process Total		30
cellular metal ion homeostasis	ZK637.5	1
cellular metal ion homeostasis Total		1
cellular process	B0496.7	1
	F53B6.5	1
	F55A3.3	1
	K12C11.1	1
	R119.2	1
	T27A8.3	1
	W03G9.4	1
	W08E12.7	1
	Y116A8A.9	1
	Y37E11AL.7	1
	Y45G5AM.2	1
cellular process Total		11
cellular protein catabolic process	F44C4.5	1
cellular protein catabolic process Total		1
cellular protein localization	F15A2.6	1
	F35D2.5	1
	T27C10.6	1
cellular protein localization Total		3
cellular protein metabolic process	C07G2.3	1
	F01F1.8	1
	F54A3.3	1
	K01C8.10	1
	T05C12.7	1
	T10B5.5	1
	T21B10.7	1
	VF11C1L.1	1
	Y22D7AL.5	1
	Y55F3AR.3	1
cellular protein metabolic process Total		10
cellular respiration	C09H10.3	1
	ZC395.2	1
cellular respiration Total		2
cellular response to DNA damage stimulus	B0412.3	1
	B0495.2	1
	C06H2.3	1
	C17G10.4	1
	C30G7.1	1
	C32D5.6	1
	C34E10.5	1
	C35A5.9	1
	C39E9.13	1
	C53A5.3	1
	C54G10.2	1
	D1081.8	1
	D2045.6	1
	E03A3.2	1
	F02E9.4	1
	F15E6.1	1
	F29C4.6	1
	F32A11.2	1
	F33H2.1	1
	F43D2.1	1
	F45E1.6	1
	F46G10.7	1
	F49E12.6	1
	F58F9.1	1
	H12C20.2	1
	H14A12.3	1
	H26D21.2	1
	K08D10.2	1
	K08E7.7	1
	K08F4.1	1
	K09B11.2	1
	M04F3.1	1
	R06C1.1	1
	R06C7.7	1
	R06F6.8	1
	T05A12.4	1
	T23G5.6	1
	T26A5.5	1
	T28A8.7	1
	T28D6.4	1
	W07A8.3	1
	Y113G7A.9	1
	Y41C4A.14	1
	Y43F4B.3	1
	Y47G6A.11	1
	Y51H4A.12	1
	Y56A3A.29	1
	Y56A3A.33	1
	Y71F9AL.18	1
	Y76A2B.5	1
	ZK520.3	1
	ZK675.2	1
	ZK856.1	1
cellular response to DNA damage stimulus Total		53
cellular response to hydrogen peroxide	R10E4.5	1
cellular response to hydrogen peroxide Total		1
cellular response to oxidative stress	EEED8.9	1
cellular response to oxidative stress Total		1
cellular response to starvation	T19E7.3	1
cellular response to starvation Total		1
cellular response to stress	B0218.3	1
	B0545.1	1
	F13B10.1	1
	F29B9.6	1
	F59A6.1	1
	K04C2.4	1
	K08A8.1	1
	K09A9.1	1
	R03G5.2	1
	W06D4.6	1
	Y116A8C.13	1
	Y43C5A.6	1
cellular response to stress Total		12
cellular water homeostasis	Y45F10A.2	1
cellular water homeostasis Total		1
centriole replication	F59E12.2	1
centriole replication Total		1
centrosomal and pronuclear rotation	C28H8.12	1
	F53A2.4	1
	T21E12.4	1
	ZK593.5	1
centrosomal and pronuclear rotation Total		4
centrosome cycle	ZK1128.2	1
centrosome cycle Total		1
centrosome localization	C47B2.3	1
	ZK546.1	1
centrosome localization Total		2
centrosome separation	F38H4.9	1
centrosome separation Total		1
ceramide biosynthetic process	C09G4.1	1
ceramide biosynthetic process Total		1
ceramide metabolic process	W02F12.2	1
ceramide metabolic process Total		1
cGMP biosynthetic process	C06B3.8	1
	C46E1.2	1
	C54E4.3	1
	F08B1.2	1
	F57F5.2	1
	M04G12.3	1
	T01A4.1	1
	T04D3.4	1
	T07D1.1	1
cGMP biosynthetic process Total		9
chaperone mediated protein folding requiring cofactor	C18E9.11	1
	Y37A1B.12	1
	Y37A1B.13	1
chaperone mediated protein folding requiring cofactor Total		3
chemosensory behavior	C02F4.2	1
	C54C6.2	1
[truncated: 23,782 more rows]

## Sheet: C) genes with bp annot (5917)
Gene ID	GO ID	GO Ontology	GO Term
2RSSE.1	GO:0007165	biological_process	signal transduction
4R79.1	GO:0006508	biological_process	proteolysis
4R79.2	GO:0006886	biological_process	intracellular protein transport
4R79.2	GO:0006913	biological_process	nucleocytoplasmic transport
4R79.2	GO:0007165	biological_process	signal transduction
4R79.2	GO:0007264	biological_process	small GTPase mediated signal transduction
4R79.2	GO:0015031	biological_process	protein transport
AC3.5	GO:0006508	biological_process	proteolysis
AC3.7	GO:0005975	biological_process	carbohydrate metabolic process
AC3.7	GO:0008152	biological_process	metabolic process
AC3.7	GO:0008340	biological_process	determination of adult life span
AC3.7	GO:0030259	biological_process	lipid glycosylation
AC3.7	GO:0040010	biological_process	positive regulation of growth rate
AC3.8	GO:0005975	biological_process	carbohydrate metabolic process
AC3.8	GO:0008152	biological_process	metabolic process
AC3.8	GO:0030259	biological_process	lipid glycosylation
AC7.2	GO:0002119	biological_process	nematode larval development
AC7.2	GO:0007517	biological_process	muscle organ development
AC7.2	GO:0008543	biological_process	fibroblast growth factor receptor signaling pathway
AC7.2	GO:0031344	biological_process	regulation of cell projection organization
AC7.2	GO:0040010	biological_process	positive regulation of growth rate
AH6.2	GO:0006812	biological_process	cation transport
AH6.2	GO:0055085	biological_process	transmembrane transport
B0001.4	GO:0008152	biological_process	metabolic process
B0024.11	GO:0001522	biological_process	pseudouridine synthesis
B0024.11	GO:0009451	biological_process	RNA modification
B0024.12	GO:0008152	biological_process	metabolic process
B0024.12	GO:0035188	biological_process	hatching
B0024.14	GO:0000003	biological_process	reproduction
B0024.14	GO:0001558	biological_process	regulation of cell growth
B0024.14	GO:0018996	biological_process	molting cycle, collagen and cuticulin-based cuticle
B0024.14	GO:0040015	biological_process	negative regulation of multicellular organism growth
B0024.14	GO:0040018	biological_process	positive regulation of multicellular organism growth
B0024.15	GO:0006486	biological_process	protein amino acid glycosylation
B0024.8	GO:0006935	biological_process	chemotaxis
B0024.8	GO:0006972	biological_process	hyperosmotic response
B0024.8	GO:0035058	biological_process	sensory cilium assembly
B0024.8	GO:0043053	biological_process	dauer entry
B0024.9	GO:0045454	biological_process	cell redox homeostasis
B0025.1	GO:0000003	biological_process	reproduction
B0025.1	GO:0002119	biological_process	nematode larval development
B0025.1	GO:0006998	biological_process	nuclear envelope organization
B0025.1	GO:0030100	biological_process	regulation of endocytosis
B0025.1	GO:0040007	biological_process	growth
B0025.1	GO:0040010	biological_process	positive regulation of growth rate
B0025.1	GO:0040011	biological_process	locomotion
B0025.1	GO:0042395	biological_process	ecdysis, collagen and cuticulin-based cuticle
B0025.1	GO:0046854	biological_process	phosphoinositide phosphorylation
B0025.1	GO:0048015	biological_process	phosphoinositide-mediated signaling
B0025.1	GO:0050708	biological_process	regulation of protein secretion
B0025.2	GO:0000003	biological_process	reproduction
B0025.2	GO:0000910	biological_process	cytokinesis
B0025.2	GO:0009792	biological_process	embryonic development ending in birth or egg hatching
B0025.2	GO:0018991	biological_process	oviposition
B0025.2	GO:0040010	biological_process	positive regulation of growth rate
B0034.3	GO:0007156	biological_process	homophilic cell adhesion
B0034.3	GO:0008306	biological_process	associative learning
B0034.3	GO:0008355	biological_process	olfactory learning
B0034.3	GO:0009792	biological_process	embryonic development ending in birth or egg hatching
B0035.10	GO:0000003	biological_process	reproduction
B0035.10	GO:0002119	biological_process	nematode larval development
B0035.10	GO:0006334	biological_process	nucleosome assembly
B0035.10	GO:0009792	biological_process	embryonic development ending in birth or egg hatching
B0035.10	GO:0010171	biological_process	body morphogenesis
B0035.10	GO:0040007	biological_process	growth
B0035.10	GO:0040010	biological_process	positive regulation of growth rate
B0035.11	GO:0000003	biological_process	reproduction
B0035.11	GO:0002119	biological_process	nematode larval development
B0035.11	GO:0006898	biological_process	receptor-mediated endocytosis
B0035.11	GO:0009792	biological_process	embryonic development ending in birth or egg hatching
B0035.11	GO:0010171	biological_process	body morphogenesis
B0035.11	GO:0040007	biological_process	growth
B0035.11	GO:0040010	biological_process	positive regulation of growth rate
B0035.11	GO:0040011	biological_process	locomotion
B0035.11	GO:0040018	biological_process	positive regulation of multicellular organism growth
B0035.11	GO:0040035	biological_process	hermaphrodite genitalia development
B0035.12	GO:0000910	biological_process	cytokinesis
B0035.12	GO:0002119	biological_process	nematode larval development
B0035.12	GO:0006396	biological_process	RNA processing
B0035.12	GO:0006898	biological_process	receptor-mediated endocytosis
B0035.12	GO:0008340	biological_process	determination of adult life span
B0035.12	GO:0009792	biological_process	embryonic development ending in birth or egg hatching
B0035.12	GO:0018991	biological_process	oviposition
B0035.12	GO:0040007	biological_process	growth
B0035.12	GO:0040010	biological_process	positive regulation of growth rate
B0035.12	GO:0040011	biological_process	locomotion
B0035.12	GO:0051301	biological_process	cell division
B0035.14	GO:0006457	biological_process	protein folding
B0035.14	GO:0040011	biological_process	locomotion
B0035.16	GO:0006529	biological_process	asparagine biosynthetic process
B0035.16	GO:0008033	biological_process	tRNA processing
B0035.4	GO:0006457	biological_process	protein folding
B0035.5	GO:0006006	biological_process	glucose metabolic process
B0035.5	GO:0008152	biological_process	metabolic process
B0035.5	GO:0009792	biological_process	embryonic development ending in birth or egg hatching
B0035.5	GO:0040010	biological_process	positive regulation of growth rate
B0035.5	GO:0055114	biological_process	oxidation reduction
B0035.7	GO:0000003	biological_process	reproduction
B0035.7	GO:0002119	biological_process	nematode larval development
B0035.7	GO:0006334	biological_process	nucleosome assembly
B0035.7	GO:0006997	biological_process	nucleus organization
B0035.7	GO:0009792	biological_process	embryonic development ending in birth or egg hatching
B0035.7	GO:0040007	biological_process	growth
B0035.7	GO:0040010	biological_process	positive regulation of growth rate
B0035.7	GO:0040011	biological_process	locomotion
B0035.8	GO:0000003	biological_process	reproduction
B0035.8	GO:0002119	biological_process	nematode larval development
B0035.8	GO:0006334	biological_process	nucleosome assembly
B0035.8	GO:0009792	biological_process	embryonic development ending in birth or egg hatching
B0035.8	GO:0040007	biological_process	growth
B0035.8	GO:0040010	biological_process	positive regulation of growth rate
B0035.8	GO:0040011	biological_process	locomotion
B0035.8	GO:0040035	biological_process	hermaphrodite genitalia development
B0035.9	GO:0000003	biological_process	reproduction
B0035.9	GO:0006334	biological_process	nucleosome assembly
B0035.9	GO:0006352	biological_process	transcription initiation
B0035.9	GO:0006898	biological_process	receptor-mediated endocytosis
B0035.9	GO:0009792	biological_process	embryonic development ending in birth or egg hatching
B0035.9	GO:0032940	biological_process	secretion by cell
B0035.9	GO:0040010	biological_process	positive regulation of growth rate
B0035.9	GO:0040011	biological_process	locomotion
B0035.9	GO:0040035	biological_process	hermaphrodite genitalia development
B0041.3	GO:0016998	biological_process	cell wall macromolecule catabolic process
B0041.3	GO:0019915	biological_process	lipid storage
B0041.4	GO:0000003	biological_process	reproduction
B0041.4	GO:0006412	biological_process	translation
B0041.4	GO:0008340	biological_process	determination of adult life span
B0041.4	GO:0009792	biological_process	embryonic development ending in birth or egg hatching
B0041.5	GO:0007411	biological_process	axon guidance
B0041.5	GO:0007413	biological_process	axonal fasciculation
B0041.5	GO:0019915	biological_process	lipid storage
B0041.6	GO:0006729	biological_process	tetrahydrobiopterin biosynthetic process
B0041.7	GO:0000003	biological_process	reproduction
B0041.7	GO:0002009	biological_process	morphogenesis of an epithelium
B0041.7	GO:0008406	biological_process	gonad development
B0041.7	GO:0009792	biological_process	embryonic development ending in birth or egg hatching
B0041.7	GO:0040025	biological_process	vulval development
B0041.7	GO:0040035	biological_process	hermaphrodite genitalia development
B0205.11	GO:0006412	biological_process	translation
B0205.11	GO:0009792	biological_process	embryonic development ending in birth or egg hatching
B0205.3	GO:0006511	biological_process	ubiquitin-dependent protein catabolic process
B0205.3	GO:0007283	biological_process	spermatogenesis
B0205.3	GO:0008340	biological_process	determination of adult life span
B0205.3	GO:0030163	biological_process	protein catabolic process
B0205.3	GO:0042006	biological_process	masculinization of hermaphroditic germ-line
B0205.4	GO:0005975	biological_process	carbohydrate metabolic process
B0205.6	GO:0000003	biological_process	reproduction
B0205.6	GO:0002119	biological_process	nematode larval development
B0205.6	GO:0006520	biological_process	cellular amino acid metabolic process
B0205.6	GO:0006534	biological_process	cysteine metabolic process
B0205.6	GO:0008152	biological_process	metabolic process
B0205.6	GO:0009792	biological_process	embryonic development ending in birth or egg hatching
B0205.6	GO:0040007	biological_process	growth
B0205.7	GO:0000003	biological_process	reproduction
B0205.7	GO:0006468	biological_process	protein amino acid phosphorylation
B0205.7	GO:0009792	biological_process	embryonic development ending in birth or egg hatching
B0205.7	GO:0034606	biological_process	response to hermaphrodite contact
B0205.7	GO:0034608	biological_process	vulval location
B0205.7	GO:0040010	biological_process	positive regulation of growth rate
B0205.7	GO:0040035	biological_process	hermaphrodite genitalia development
B0207.12	GO:0006810	biological_process	transport
B0207.12	GO:0006811	biological_process	ion transport
B0207.12	GO:0031987	biological_process	locomotion involved in locomotory behavior
B0207.12	GO:0042493	biological_process	response to drug
B0207.12	GO:0043051	biological_process	regulation of pharyngeal pumping
B0207.4	GO:0000003	biological_process	reproduction
B0207.4	GO:0006468	biological_process	protein amino acid phosphorylation
B0207.4	GO:0007052	biological_process	mitotic spindle organization
B0207.4	GO:0007059	biological_process	chromosome segregation
B0207.4	GO:0007067	biological_process	mitosis
B0207.4	GO:0007109	biological_process	cytokinesis, completion of separation
B0207.4	GO:0007126	biological_process	meiosis
B0207.4	GO:0009792	biological_process	embryonic development ending in birth or egg hatching
B0207.4	GO:0018108	biological_process	peptidyl-tyrosine phosphorylation
B0207.4	GO:0030261	biological_process	chromosome condensation
B0207.4	GO:0031991	biological_process	regulation of contractile ring contraction involved in cytokinesis
B0207.4	GO:0040011	biological_process	locomotion
B0207.4	GO:0040035	biological_process	hermaphrodite genitalia development
B0207.4	GO:0045184	biological_process	establishment of protein localization
B0207.4	GO:0051256	biological_process	spindle midzone assembly involved in mitosis
B0207.6	GO:0000003	biological_process	reproduction
B0207.6	GO:0002009	biological_process	morphogenesis of an epithelium
B0207.6	GO:0009792	biological_process	embryonic development ending in birth or egg hatching
B0207.6	GO:0018991	biological_process	oviposition
B0207.6	GO:0040010	biological_process	positive regulation of growth rate
B0207.6	GO:0040011	biological_process	locomotion
B0207.6	GO:0040035	biological_process	hermaphrodite genitalia development
B0212.5	GO:0006811	biological_process	ion transport
B0212.5	GO:0006972	biological_process	hyperosmotic response
B0212.5	GO:0007608	biological_process	sensory perception of smell
B0212.5	GO:0008355	biological_process	olfactory learning
B0212.5	GO:0009612	biological_process	response to mechanical stimulus
B0212.5	GO:0022401	biological_process	adaptation of signaling pathway
B0212.5	GO:0042048	biological_process	olfactory behavior
B0212.5	GO:0055085	biological_process	transmembrane transport
B0213.10	GO:0055114	biological_process	oxidation reduction
B0213.11	GO:0055114	biological_process	oxidation reduction
B0213.12	GO:0055114	biological_process	oxidation reduction
B0213.14	GO:0055114	biological_process	oxidation reduction
B0213.15	GO:0008340	biological_process	determination of adult life span
B0213.15	GO:0055114	biological_process	oxidation reduction
B0213.16	GO:0055114	biological_process	oxidation reduction
B0218.3	GO:0006468	biological_process	protein amino acid phosphorylation
B0218.3	GO:0006952	biological_process	defense response
B0218.3	GO:0006972	biological_process	hyperosmotic response
B0218.3	GO:0008340	biological_process	determination of adult life span
B0218.3	GO:0010552	biological_process	positive regulation of specific transcription from RNA polymerase II promoter
B0218.3	GO:0012501	biological_process	programmed cell death
B0218.3	GO:0033554	biological_process	cellular response to stress
B0218.3	GO:0045087	biological_process	innate immune response
B0218.3	GO:0050829	biological_process	defense response to Gram-negative bacterium
B0218.5	GO:0006468	biological_process	protein amino acid phosphorylation
B0218.5	GO:0019915	biological_process	lipid storage
B0222.2	GO:0006817	biological_process	phosphate transport
B0222.3	GO:0006817	biological_process	phosphate transport
B0222.4	GO:0008152	biological_process	metabolic process
B0222.4	GO:0019752	biological_process	carboxylic acid metabolic process
B0222.9	GO:0006468	biological_process	protein amino acid phosphorylation
B0222.9	GO:0055114	biological_process	oxidation reduction
B0228.5	GO:0008340	biological_process	determination of adult life span
B0228.5	GO:0045454	biological_process	cell redox homeostasis
B0228.7	GO:0009116	biological_process	nucleoside metabolic process
B0238.10	GO:0008152	biological_process	metabolic process
B0240.1	GO:0006810	biological_process	transport
B0240.1	GO:0055085	biological_process	transmembrane transport
B0240.4	GO:0009792	biological_process	embryonic development ending in birth or egg hatching
B0244.2	GO:0001956	biological_process	positive regulation of neurotransmitter secretion
B0244.2	GO:0006470	biological_process	protein amino acid dephosphorylation
B0244.2	GO:0006887	biological_process	exocytosis
B0244.2	GO:0009790	biological_process	embryonic development
B0250.1	GO:0000003	biological_process	reproduction
B0250.1	GO:0002119	biological_process	nematode larval development
B0250.1	GO:0006412	biological_process	translation
B0250.1	GO:0009792	biological_process	embryonic development ending in birth or egg hatching
B0250.1	GO:0040007	biological_process	growth
B0250.1	GO:0040010	biological_process	positive regulation of growth rate
B0250.1	GO:0040011	biological_process	locomotion
B0250.5	GO:0006573	biological_process	valine metabolic process
B0250.5	GO:0006813	biological_process	potassium ion transport
B0250.5	GO:0008152	biological_process	metabolic process
B0250.5	GO:0055114	biological_process	oxidation reduction
B0252.2	GO:0006685	biological_process	sphingomyelin catabolic process
B0252.4	GO:0006457	biological_process	protein folding
B0261.1	GO:0000003	biological_process	reproduction
B0261.1	GO:0002119	biological_process	nematode larval development
B0261.1	GO:0006898	biological_process	receptor-mediated endocytosis
B0261.1	GO:0009792	biological_process	embryonic development ending in birth or egg hatching
B0261.1	GO:0040007	biological_process	growth
B0261.1	GO:0040010	biological_process	positive regulation of growth rate
B0261.2	GO:0000003	biological_process	reproduction
B0261.2	GO:0000492	biological_process	box C/D snoRNP assembly
B0261.2	GO:0002119	biological_process	nematode larval development
B0261.2	GO:0006412	biological_process	translation
B0261.2	GO:0006445	biological_process	regulation of translation
B0261.2	GO:0006629	biological_process	lipid metabolic process
B0261.2	GO:0008340	biological_process	determination of adult life span
B0261.2	GO:0008406	biological_process	gonad development
B0261.2	GO:0009408	biological_process	response to heat
B0261.2	GO:0009792	biological_process	embryonic development ending in birth or egg hatching
B0261.2	GO:0031929	biological_process	TOR signaling pathway
B0261.2	GO:0040007	biological_process	growth
B0261.2	GO:0040010	biological_process	positive regulation of growth rate
B0261.2	GO:0043053	biological_process	dauer entry
B0261.2	GO:0045727	biological_process	positive regulation of translation
B0261.2	GO:0046854	biological_process	phosphoinositide phosphorylation
B0261.4	GO:0000003	biological_process	reproduction
B0261.4	GO:0002119	biological_process	nematode larval development
B0261.4	GO:0006412	biological_process	translation
B0261.4	GO:0008340	biological_process	determination of adult life span
B0261.4	GO:0009792	biological_process	embryonic development ending in birth or egg hatching
B0261.4	GO:0010171	biological_process	body morphogenesis
B0261.4	GO:0040007	biological_process	growth
B0261.4	GO:0040010	biological_process	positive regulation of growth rate
B0272.1	GO:0007017	biological_process	microtubule-based process
B0272.1	GO:0007018	biological_process	microtubule-based movement
B0272.1	GO:0007067	biological_process	mitosis
B0272.1	GO:0009792	biological_process	embryonic development ending in birth or egg hatching
B0272.1	GO:0035046	biological_process	pronuclear migration
B0272.1	GO:0051258	biological_process	protein polymerization
B0272.2	GO:0009792	biological_process	embryonic development ending in birth or egg hatching
B0272.3	GO:0006098	biological_process	pentose-phosphate shunt
B0272.3	GO:0006631	biological_process	fatty acid metabolic process
B0272.3	GO:0008152	biological_process	metabolic process
B0272.3	GO:0055114	biological_process	oxidation reduction
B0272.4	GO:0008152	biological_process	metabolic process
B0273.2	GO:0000910	biological_process	cytokinesis
B0273.2	GO:0007281	biological_process	germ cell development
B0273.2	GO:0035188	biological_process	hatching
B0273.2	GO:0048477	biological_process	oogenesis
B0273.2	GO:0051301	biological_process	cell division
B0273.3	GO:0000003	biological_process	reproduction
B0273.4	GO:0007165	biological_process	signal transduction
B0273.4	GO:0007411	biological_process	axon guidance
B0273.4	GO:0008045	biological_process	motor axon guidance
B0273.4	GO:0008078	biological_process	mesodermal cell migration
B0273.4	GO:0016358	biological_process	dendrite development
B0273.4	GO:0033563	biological_process	dorsal/ventral axon guidance
B0273.4	GO:0035262	biological_process	gonad morphogenesis
B0273.4	GO:0040011	biological_process	locomotion
B0273.4	GO:0040017	biological_process	positive regulation of locomotion
B0273.4	GO:0045773	biological_process	positive regulation of axon extension
B0280.1	GO:0000003	biological_process	reproduction
B0280.1	GO:0008219	biological_process	cell death
B0280.1	GO:0009790	biological_process	embryonic development
B0280.1	GO:0009792	biological_process	embryonic development ending in birth or egg hatching
B0280.12	GO:0002119	biological_process	nematode larval development
B0280.12	GO:0006810	biological_process	transport
B0280.12	GO:0006811	biological_process	ion transport
B0280.12	GO:0009790	biological_process	embryonic development
B0280.12	GO:0009792	biological_process	embryonic development ending in birth or egg hatching
B0280.12	GO:0040007	biological_process	growth
B0280.17	GO:0000003	biological_process	reproduction
B0280.17	GO:0008219	biological_process	cell death
B0280.17	GO:0009790	biological_process	embryonic development
B0280.17	GO:0009792	biological_process	embryonic development ending in birth or egg hatching
B0280.3	GO:0009052	biological_process	pentose-phosphate shunt, non-oxidative branch
B0280.3	GO:0009790	biological_process	embryonic development
B0280.3	GO:0019915	biological_process	lipid storage
B0280.3	GO:0040011	biological_process	locomotion
B0280.9	GO:0002119	biological_process	nematode larval development
B0280.9	GO:0006898	biological_process	receptor-mediated endocytosis
B0280.9	GO:0009792	biological_process	embryonic development ending in birth or egg hatching
B0280.9	GO:0040007	biological_process	growth
B0280.9	GO:0040010	biological_process	positive regulation of growth rate
B0281.5	GO:0006813	biological_process	potassium ion transport
B0281.6	GO:0006813	biological_process	potassium ion transport
B0285.1	GO:0000003	biological_process	reproduction
B0285.1	GO:0002119	biological_process	nematode larval development
B0285.1	GO:0006468	biological_process	protein amino acid phosphorylation
B0285.1	GO:0006898	biological_process	receptor-mediated endocytosis
B0285.1	GO:0009790	biological_process	embryonic development
B0285.1	GO:0009792	biological_process	embryonic development ending in birth or egg hatching
B0285.1	GO:0010171	biological_process	body morphogenesis
B0285.1	GO:0040007	biological_process	growth
B0285.1	GO:0040010	biological_process	positive regulation of growth rate
B0285.1	GO:0040011	biological_process	locomotion
B0285.1	GO:0040035	biological_process	hermaphrodite genitalia development
B0285.10	GO:0040010	biological_process	positive regulation of growth rate
B0285.4	GO:0009790	biological_process	embryonic development
B0285.4	GO:0040010	biological_process	positive regulation of growth rate
B0285.5	GO:0006024	biological_process	glycosaminoglycan biosynthetic process
B0285.5	GO:0007411	biological_process	axon guidance
B0285.5	GO:0007413	biological_process	axonal fasciculation
B0285.5	GO:0009790	biological_process	embryonic development
B0285.5	GO:0040010	biological_process	positive regulation of growth rate
B0285.5	GO:0040018	biological_process	positive regulation of multicellular organism growth
B0285.6	GO:0006814	biological_process	sodium ion transport
B0285.6	GO:0009790	biological_process	embryonic development
B0285.6	GO:0015746	biological_process	citrate transport
B0285.6	GO:0055085	biological_process	transmembrane transport
B0285.8	GO:0009790	biological_process	embryonic development
B0285.8	GO:0019915	biological_process	lipid storage
B0285.8	GO:0040010	biological_process	positive regulation of growth rate
B0285.9	GO:0009790	biological_process	embryonic development
B0285.9	GO:0040010	biological_process	positive regulation of growth rate
B0286.2	GO:0007186	biological_process	G-protein coupled receptor protein signaling pathway
B0286.2	GO:0007218	biological_process	neuropeptide signaling pathway
B0286.3	GO:0002119	biological_process	nematode larval development
B0286.3	GO:0006164	biological_process	purine nucleotide biosynthetic process
B0286.3	GO:0006189	biological_process	'de novo' IMP biosynthetic process
B0286.3	GO:0040007	biological_process	growth
B0286.4	GO:0000003	biological_process	reproduction
B0286.4	GO:0002009	biological_process	morphogenesis of an epithelium
B0286.4	GO:0002119	biological_process	nematode larval development
B0286.4	GO:0006898	biological_process	receptor-mediated endocytosis
B0286.4	GO:0008340	biological_process	determination of adult life span
B0286.4	GO:0009792	biological_process	embryonic development ending in birth or egg hatching
B0286.4	GO:0019915	biological_process	lipid storage
B0286.4	GO:0040007	biological_process	growth
B0286.4	GO:0040010	biological_process	positive regulation of growth rate
B0286.4	GO:0040011	biological_process	locomotion
B0286.4	GO:0040018	biological_process	positive regulation of multicellular organism growth
B0286.4	GO:0040035	biological_process	hermaphrodite genitalia development
B0286.4	GO:0045449	biological_process	regulation of transcription
B0286.5	GO:0000003	biological_process	reproduction
B0286.5	GO:0002009	biological_process	morphogenesis of an epithelium
B0286.5	GO:0006355	biological_process	regulation of transcription, DNA-dependent
B0286.5	GO:0006898	biological_process	receptor-mediated endocytosis
B0286.5	GO:0008356	biological_process	asymmetric cell division
B0286.5	GO:0008406	biological_process	gonad development
B0286.5	GO:0018991	biological_process	oviposition
B0286.5	GO:0019100	biological_process	male germ-line sex determination
B0286.5	GO:0040002	biological_process	collagen and cuticulin-based cuticle development
B0286.5	GO:0040035	biological_process	hermaphrodite genitalia development
B0286.5	GO:0045449	biological_process	regulation of transcription
B0302.1	GO:0006468	biological_process	protein amino acid phosphorylation
B0303.11	GO:0006810	biological_process	transport
B0303.11	GO:0009790	biological_process	embryonic development
B0303.11	GO:0055085	biological_process	transmembrane transport
B0303.15	GO:0002119	biological_process	nematode larval development
B0303.15	GO:0006412	biological_process	translation
B0303.15	GO:0006898	biological_process	receptor-mediated endocytosis
B0303.15	GO:0009792	biological_process	embryonic development ending in birth or egg hatching
B0303.15	GO:0040007	biological_process	growth
B0303.15	GO:0040010	biological_process	positive regulation of growth rate
B0303.2	GO:0009790	biological_process	embryonic development
B0303.3	GO:0008152	biological_process	metabolic process
B0303.3	GO:0009792	biological_process	embryonic development ending in birth or egg hatching
B0303.4	GO:0009790	biological_process	embryonic development
B0303.7	GO:0009790	biological_process	embryonic development
B0303.9	GO:0006904	biological_process	vesicle docking during exocytosis
B0303.9	GO:0008340	biological_process	determination of adult life span
B0303.9	GO:0009790	biological_process	embryonic development
B0303.9	GO:0016192	biological_process	vesicle-mediated transport
B0304.1	GO:0000003	biological_process	reproduction
B0304.1	GO:0002119	biological_process	nematode larval development
B0304.1	GO:0006357	biological_process	regulation of transcription from RNA polymerase II promoter
B0304.1	GO:0007517	biological_process	muscle organ development
B0304.1	GO:0009792	biological_process	embryonic development ending in birth or egg hatching
B0304.1	GO:0010171	biological_process	body morphogenesis
B0304.1	GO:0040010	biological_process	positive regulation of growth rate
B0304.1	GO:0040011	biological_process	locomotion
B0304.1	GO:0045449	biological_process	regulation of transcription
B0304.1	GO:0045944	biological_process	positive regulation of transcription from RNA polymerase II promoter
B0304.1	GO:0051291	biological_process	protein heterooligomerization
B0304.3	GO:0040011	biological_process	locomotion
B0304.3	GO:0055114	biological_process	oxidation reduction
B0331.1	GO:0055114	biological_process	oxidation reduction
B0331.2	GO:0006817	biological_process	phosphate transport
B0334.5	GO:0009058	biological_process	biosynthetic process
B0334.5	GO:0040010	biological_process	positive regulation of growth rate
B0334.6	GO:0007186	biological_process	G-protein coupled receptor protein signaling pathway
B0334.8	GO:0000003	biological_process	reproduction
B0334.8	GO:0007165	biological_process	signal transduction
B0334.8	GO:0007611	biological_process	learning or memory
B0334.8	GO:0008340	biological_process	determination of adult life span
B0334.8	GO:0009792	biological_process	embryonic development ending in birth or egg hatching
B0334.8	GO:0043053	biological_process	dauer entry
B0334.8	GO:0046854	biological_process	phosphoinositide phosphorylation
B0334.8	GO:0048015	biological_process	phosphoinositide-mediated signaling
B0334.8	GO:0050920	biological_process	regulation of chemotaxis
B0336.10	GO:0000003	biological_process	reproduction
B0336.10	GO:0002119	biological_process	nematode larval development
B0336.10	GO:0006412	biological_process	translation
B0336.10	GO:0009792	biological_process	embryonic development ending in birth or egg hatching
B0336.10	GO:0018996	biological_process	molting cycle, collagen and cuticulin-based cuticle
B0336.10	GO:0040007	biological_process	growth
B0336.11	GO:0009790	biological_process	embryonic development
B0336.13	GO:0006367	biological_process	transcription initiation from RNA polymerase II promoter
B0336.13	GO:0009790	biological_process	embryonic development
B0336.2	GO:0000003	biological_process	reproduction
B0336.2	GO:0002009	biological_process	morphogenesis of an epithelium
B0336.2	GO:0002119	biological_process	nematode larval development
B0336.2	GO:0006886	biological_process	intracellular protein transport
B0336.2	GO:0007186	biological_process	G-protein coupled receptor protein signaling pathway
B0336.2	GO:0007264	biological_process	small GTPase mediated signal transduction
B0336.2	GO:0009792	biological_process	embryonic development ending in birth or egg hatching
B0336.2	GO:0015031	biological_process	protein transport
B0336.2	GO:0040010	biological_process	positive regulation of growth rate
B0336.2	GO:0040011	biological_process	locomotion
B0336.2	GO:0040035	biological_process	hermaphrodite genitalia development
B0336.2	GO:0045045	biological_process	secretory pathway
B0336.2	GO:0048599	biological_process	oocyte development
B0336.3	GO:0009790	biological_process	embryonic development
B0336.3	GO:0010171	biological_process	body morphogenesis
B0336.3	GO:0040010	biological_process	positive regulation of growth rate
B0336.4	GO:0009790	biological_process	embryonic development
B0336.5	GO:0009790	biological_process	embryonic development
B0336.6	GO:0000003	biological_process	reproduction
B0336.6	GO:0001764	biological_process	neuron migration
B0336.6	GO:0002009	biological_process	morphogenesis of an epithelium
B0336.6	GO:0002119	biological_process	nematode larval development
B0336.6	GO:0006898	biological_process	receptor-mediated endocytosis
B0336.6	GO:0008340	biological_process	determination of adult life span
B0336.6	GO:0009790	biological_process	embryonic development
B0336.6	GO:0009792	biological_process	embryonic development ending in birth or egg hatching
B0336.6	GO:0010171	biological_process	body morphogenesis
B0336.6	GO:0016477	biological_process	cell migration
B0336.6	GO:0018991	biological_process	oviposition
B0336.6	GO:0040007	biological_process	growth
B0336.6	GO:0040010	biological_process	positive regulation of growth rate
B0336.6	GO:0040011	biological_process	locomotion
B0336.6	GO:0040035	biological_process	hermaphrodite genitalia development
B0336.6	GO:0043652	biological_process	engulfment of apoptotic cell
B0336.8	GO:0000045	biological_process	autophagic vacuole formation
B0336.8	GO:0008340	biological_process	determination of adult life span
B0336.8	GO:0009790	biological_process	embryonic development
B0336.9	GO:0006396	biological_process	RNA processing
B0336.9	GO:0009790	biological_process	embryonic development
B0348.4	GO:0000003	biological_process	reproduction
B0348.4	GO:0006629	biological_process	lipid metabolic process
B0348.4	GO:0007165	biological_process	signal transduction
B0348.4	GO:0007212	biological_process	dopamine receptor signaling pathway
B0348.4	GO:0007242	biological_process	intracellular signaling cascade
B0348.4	GO:0007320	biological_process	insemination
B0348.4	GO:0009792	biological_process	embryonic development ending in birth or egg hatching
B0348.4	GO:0034609	biological_process	spicule insertion
B0348.4	GO:0040010	biological_process	positive regulation of growth rate
B0348.4	GO:0040012	biological_process	regulation of locomotion
B0348.4	GO:0040017	biological_process	positive regulation of locomotion
B0348.4	GO:0043051	biological_process	regulation of pharyngeal pumping
B0348.4	GO:0046662	biological_process	regulation of oviposition
B0348.6	GO:0006413	biological_process	translational initiation
B0348.6	GO:0009792	biological_process	embryonic development ending in birth or egg hatching
B0350.2	GO:0000003	biological_process	reproduction
B0350.2	GO:0005975	biological_process	carbohydrate metabolic process
B0350.2	GO:0007126	biological_process	meiosis
B0350.2	GO:0007165	biological_process	signal transduction
B0350.2	GO:0010171	biological_process	body morphogenesis
B0350.2	GO:0033563	biological_process	dorsal/ventral axon guidance
B0350.2	GO:0040010	biological_process	positive regulation of growth rate
B0350.2	GO:0040011	biological_process	locomotion
B0350.2	GO:0040017	biological_process	positive regulation of locomotion
B0350.2	GO:0040018	biological_process	positive regulation of multicellular organism growth
B0361.10	GO:0000003	biological_process	reproduction
B0361.10	GO:0002119	biological_process	nematode larval development
B0361.10	GO:0006898	biological_process	receptor-mediated endocytosis
B0361.10	GO:0009792	biological_process	embryonic development ending in birth or egg hatching
B0361.10	GO:0016192	biological_process	vesicle-mediated transport
B0361.10	GO:0040007	biological_process	growth
B0361.10	GO:0040010	biological_process	positive regulation of growth rate
B0361.10	GO:0040011	biological_process	locomotion
B0361.2	GO:0000003	biological_process	reproduction
B0361.2	GO:0009790	biological_process	embryonic development
B0361.5	GO:0008654	biological_process	phospholipid biosynthetic process
B0361.5	GO:0009790	biological_process	embryonic development
B0361.5	GO:0040010	biological_process	positive regulation of growth rate
B0361.6	GO:0002119	biological_process	nematode larval development
B0361.6	GO:0006898	biological_process	receptor-mediated endocytosis
B0361.6	GO:0009790	biological_process	embryonic development
B0361.6	GO:0009792	biological_process	embryonic development ending in birth or egg hatching
B0361.6	GO:0040007	biological_process	growth
B0361.6	GO:0040010	biological_process	positive regulation of growth rate
B0361.7	GO:0009790	biological_process	embryonic development
B0361.8	GO:0000003	biological_process	reproduction
B0361.8	GO:0002119	biological_process	nematode larval development
B0361.8	GO:0006898	biological_process	receptor-mediated endocytosis
B0361.8	GO:0009058	biological_process	biosynthetic process
B0361.8	GO:0009790	biological_process	embryonic development
B0361.8	GO:0040007	biological_process	growth
B0361.8	GO:0040011	biological_process	locomotion
B0365.1	GO:0008152	biological_process	metabolic process
B0365.1	GO:0044262	biological_process	cellular carbohydrate metabolic process
B0365.3	GO:0000003	biological_process	reproduction
B0365.3	GO:0001508	biological_process	regulation of action potential
B0365.3	GO:0002119	biological_process	nematode larval development
B0365.3	GO:0006754	biological_process	ATP biosynthetic process
B0365.3	GO:0006812	biological_process	cation transport
B0365.3	GO:0006813	biological_process	potassium ion transport
B0365.3	GO:0006814	biological_process	sodium ion transport
B0365.3	GO:0006937	biological_process	regulation of muscle contraction
B0365.3	GO:0007271	biological_process	synaptic transmission, cholinergic
B0365.3	GO:0008152	biological_process	metabolic process
B0365.3	GO:0009792	biological_process	embryonic development ending in birth or egg hatching
B0365.3	GO:0010171	biological_process	body morphogenesis
B0365.3	GO:0010248	biological_process	establishment or maintenance of transmembrane electrochemical gradient
B0365.3	GO:0015672	biological_process	monovalent inorganic cation transport
B0365.3	GO:0040007	biological_process	growth
B0365.3	GO:0042391	biological_process	regulation of membrane potential
B0365.6	GO:0040010	biological_process	positive regulation of growth rate
B0365.6	GO:0040011	biological_process	locomotion
B0365.6	GO:0040015	biological_process	negative regulation of multicellular organism growth
B0379.4	GO:0018991	biological_process	oviposition
B0393.1	GO:0000003	biological_process	reproduction
B0393.1	GO:0002119	biological_process	nematode larval development
B0393.1	GO:0006412	biological_process	translation
B0393.1	GO:0009792	biological_process	embryonic development ending in birth or egg hatching
B0393.1	GO:0018996	biological_process	molting cycle, collagen and cuticulin-based cuticle
B0393.1	GO:0040007	biological_process	growth
B0393.1	GO:0040010	biological_process	positive regulation of growth rate
B0393.1	GO:0040035	biological_process	hermaphrodite genitalia development
B0393.2	GO:0009790	biological_process	embryonic development
B0393.2	GO:0019915	biological_process	lipid storage
B0393.2	GO:0032313	biological_process	regulation of Rab GTPase activity
B0393.5	GO:0007160	biological_process	cell-matrix adhesion
B0393.5	GO:0009790	biological_process	embryonic development
B0393.5	GO:0040010	biological_process	positive regulation of growth rate
B0395.1	GO:0006812	biological_process	cation transport
B0395.1	GO:0006814	biological_process	sodium ion transport
B0395.1	GO:0006885	biological_process	regulation of pH
B0395.1	GO:0009792	biological_process	embryonic development ending in birth or egg hatching
B0395.1	GO:0040010	biological_process	positive regulation of growth rate
B0395.1	GO:0040011	biological_process	locomotion
B0395.1	GO:0055085	biological_process	transmembrane transport
B0395.2	GO:0008340	biological_process	determination of adult life span
B0395.2	GO:0040011	biological_process	locomotion
B0395.3	GO:0040011	biological_process	locomotion
B0399.1	GO:0006813	biological_process	potassium ion transport
B0403.2	GO:0043687	biological_process	post-translational protein modification
B0403.2	GO:0051246	biological_process	regulation of protein metabolic process
B0403.4	GO:0002119	biological_process	nematode larval development
B0403.4	GO:0040007	biological_process	growth
B0403.4	GO:0040011	biological_process	locomotion
B0403.4	GO:0045454	biological_process	cell redox homeostasis
B0410.2	GO:0007275	biological_process	multicellular organismal development
B0410.2	GO:0009792	biological_process	embryonic development ending in birth or egg hatching
B0412.1	GO:0009790	biological_process	embryonic development
B0412.2	GO:0006952	biological_process	defense response
B0412.2	GO:0009790	biological_process	embryonic development
B0412.2	GO:0019915	biological_process	lipid storage
B0412.2	GO:0040007	biological_process	growth
B0412.2	GO:0040024	biological_process	dauer larval development
B0412.2	GO:0043051	biological_process	regulation of pharyngeal pumping
B0412.2	GO:0045944	biological_process	positive regulation of transcription from RNA polymerase II promoter
B0412.3	GO:0009790	biological_process	embryonic development
B0412.3	GO:0034984	biological_process	cellular response to DNA damage stimulus
B0412.3	GO:0040010	biological_process	positive regulation of growth rate
B0412.4	GO:0000003	biological_process	reproduction
B0412.4	GO:0002119	biological_process	nematode larval development
B0412.4	GO:0006412	biological_process	translation
B0412.4	GO:0009792	biological_process	embryonic development ending in birth or egg hatching
B0412.4	GO:0010171	biological_process	body morphogenesis
B0412.4	GO:0040007	biological_process	growth
B0412.4	GO:0040010	biological_process	positive regulation of growth rate
B0414.2	GO:0000003	biological_process	reproduction
B0414.2	GO:0006355	biological_process	regulation of transcription, DNA-dependent
B0414.2	GO:0009792	biological_process	embryonic development ending in birth or egg hatching
B0414.2	GO:0035188	biological_process	hatching
B0414.3	GO:0006334	biological_process	nucleosome assembly
B0414.3	GO:0007126	biological_process	meiosis
B0414.3	GO:0045132	biological_process	meiotic chromosome segregation
B0414.5	GO:0000003	biological_process	reproduction
B0414.5	GO:0006915	biological_process	apoptosis
B0414.5	GO:0007276	biological_process	gamete generation
B0414.5	GO:0007281	biological_process	germ cell development
B0414.5	GO:0009792	biological_process	embryonic development ending in birth or egg hatching
B0414.5	GO:0040010	biological_process	positive regulation of growth rate
B0414.7	GO:0006468	biological_process	protein amino acid phosphorylation
B0414.7	GO:0009792	biological_process	embryonic development ending in birth or egg hatching
B0414.7	GO:0016246	biological_process	RNA interference
B0416.5	GO:0000003	biological_process	reproduction
B0416.5	GO:0006898	biological_process	receptor-mediated endocytosis
B0416.5	GO:0040010	biological_process	positive regulation of growth rate
B0416.5	GO:0055085	biological_process	transmembrane transport
B0416.6	GO:0006487	biological_process	protein amino acid N-linked glycosylation
B0432.13	GO:0040018	biological_process	positive regulation of multicellular organism growth
B0432.2	GO:0009636	biological_process	response to toxin
B0432.4	GO:0006810	biological_process	transport
B0432.4	GO:0055085	biological_process	transmembrane transport
B0432.5	GO:0007638	biological_process	mechanosensory behavior
B0432.5	GO:0009072	biological_process	aromatic amino acid family metabolic process
B0432.5	GO:0032094	biological_process	response to food
B0432.5	GO:0034607	biological_process	turning behavior involved in mating
B0432.5	GO:0040012	biological_process	regulation of locomotion
B0432.5	GO:0042416	biological_process	dopamine biosynthetic process
B0432.5	GO:0042417	biological_process	dopamine metabolic process
B0432.5	GO:0046959	biological_process	habituation
B0432.5	GO:0055114	biological_process	oxidation reduction
B0432.5	GO:0060179	biological_process	male mating behavior
B0432.9	GO:0040018	biological_process	positive regulation of multicellular organism growth
B0454.6	GO:0006810	biological_process	transport
B0454.6	GO:0006865	biological_process	amino acid transport
B0454.6	GO:0055085	biological_process	transmembrane transport
B0457.1	GO:0007186	biological_process	G-protein coupled receptor protein signaling pathway
B0457.1	GO:0007218	biological_process	neuropeptide signaling pathway
B0457.1	GO:0009790	biological_process	embryonic development
B0457.1	GO:0030421	biological_process	defecation
B0457.1	GO:0043050	biological_process	pharyngeal pumping
B0464.1	GO:0000003	biological_process	reproduction
B0464.1	GO:0002119	biological_process	nematode larval development
B0464.1	GO:0006412	biological_process	translation
B0464.1	GO:0006418	biological_process	tRNA aminoacylation for protein translation
B0464.1	GO:0006422	biological_process	aspartyl-tRNA aminoacylation
B0464.1	GO:0006898	biological_process	receptor-mediated endocytosis
B0464.1	GO:0009792	biological_process	embryonic development ending in birth or egg hatching
B0464.1	GO:0040007	biological_process	growth
B0464.2	GO:0000003	biological_process	reproduction
B0464.2	GO:0002119	biological_process	nematode larval development
B0464.2	GO:0006898	biological_process	receptor-mediated endocytosis
B0464.2	GO:0009792	biological_process	embryonic development ending in birth or egg hatching
B0464.2	GO:0040007	biological_process	growth
B0464.5	GO:0000003	biological_process	reproduction
B0464.5	GO:0000910	biological_process	cytokinesis
B0464.5	GO:0002119	biological_process	nematode larval development
B0464.5	GO:0006468	biological_process	protein amino acid phosphorylation
B0464.5	GO:0007276	biological_process	gamete generation
B0464.5	GO:0009792	biological_process	embryonic development ending in birth or egg hatching
B0464.5	GO:0040035	biological_process	hermaphrodite genitalia development
B0464.5	GO:0051729	biological_process	germline cell cycle switching, mitotic to meiotic cell cycle
B0464.6	GO:0009790	biological_process	embryonic development
B0464.7	GO:0000003	biological_process	reproduction
B0464.7	GO:0006997	biological_process	nucleus organization
B0464.7	GO:0007059	biological_process	chromosome segregation
B0464.7	GO:0009792	biological_process	embryonic development ending in birth or egg hatching
B0464.7	GO:0010171	biological_process	body morphogenesis
B0464.7	GO:0040011	biological_process	locomotion
B0464.7	GO:0040035	biological_process	hermaphrodite genitalia development
B0464.7	GO:0051276	biological_process	chromosome organization
B0464.9	GO:0000003	biological_process	reproduction
B0464.9	GO:0002119	biological_process	nematode larval development
B0464.9	GO:0008340	biological_process	determination of adult life span
B0464.9	GO:0009792	biological_process	embryonic development ending in birth or egg hatching
B0464.9	GO:0040007	biological_process	growth
B0478.1	GO:0006468	biological_process	protein amino acid phosphorylation
B0478.1	GO:0006972	biological_process	hyperosmotic response
B0478.1	GO:0006979	biological_process	response to oxidative stress
B0478.1	GO:0007258	biological_process	JUN phosphorylation
B0478.1	GO:0008340	biological_process	determination of adult life span
B0478.1	GO:0009103	biological_process	lipopolysaccharide biosynthetic process
B0478.1	GO:0009408	biological_process	response to heat
B0491.1	GO:0006506	biological_process	GPI anchor biosynthetic process
B0491.2	GO:0009792	biological_process	embryonic development ending in birth or egg hatching
B0491.2	GO:0010171	biological_process	body morphogenesis
B0491.2	GO:0040002	biological_process	collagen and cuticulin-based cuticle development
B0491.2	GO:0040010	biological_process	positive regulation of growth rate
B0491.2	GO:0040015	biological_process	negative regulation of multicellular organism growth
B0491.7	GO:0008152	biological_process	metabolic process
B0491.7	GO:0017183	biological_process	peptidyl-diphthamide biosynthetic process from peptidyl-histidine
B0491.8	GO:0000003	biological_process	reproduction
B0491.8	GO:0006810	biological_process	transport
B0491.8	GO:0006821	biological_process	chloride transport
B0491.8	GO:0009792	biological_process	embryonic development ending in birth or egg hatching
B0491.8	GO:0055085	biological_process	transmembrane transport
B0495.2	GO:0000003	biological_process	reproduction
B0495.2	GO:0006468	biological_process	protein amino acid phosphorylation
B0495.2	GO:0009792	biological_process	embryonic development ending in birth or egg hatching
B0495.2	GO:0034984	biological_process	cellular response to DNA damage stimulus
B0495.2	GO:0040010	biological_process	positive regulation of growth rate
B0495.4	GO:0000003	biological_process	reproduction
B0495.4	GO:0002119	biological_process	nematode larval development
B0495.4	GO:0006812	biological_process	cation transport
B0495.4	GO:0006814	biological_process	sodium ion transport
B0495.4	GO:0006885	biological_process	regulation of pH
B0495.4	GO:0008340	biological_process	determination of adult life span
B0495.4	GO:0009935	biological_process	nutrient import
B0495.4	GO:0010171	biological_process	body morphogenesis
B0495.4	GO:0019915	biological_process	lipid storage
B0495.4	GO:0040007	biological_process	growth
B0495.4	GO:0040010	biological_process	positive regulation of growth rate
B0495.4	GO:0040018	biological_process	positive regulation of multicellular organism growth
B0495.4	GO:0043051	biological_process	regulation of pharyngeal pumping
B0495.4	GO:0055085	biological_process	transmembrane transport
B0495.7	GO:0006508	biological_process	proteolysis
B0495.7	GO:0008152	biological_process	metabolic process
B0495.7	GO:0040011	biological_process	locomotion
B0496.3	GO:0006468	biological_process	protein amino acid phosphorylation
B0496.3	GO:0009103	biological_process	lipopolysaccharide biosynthetic process
B0496.7	GO:0009987	biological_process	cellular process
B0496.7	GO:0018991	biological_process	oviposition
B0496.7	GO:0022600	biological_process	digestive system process
B0496.8	GO:0008340	biological_process	determination of adult life span
B0511.1	GO:0006457	biological_process	protein folding
B0511.10	GO:0000003	biological_process	reproduction
B0511.10	GO:0002119	biological_process	nematode larval development
B0511.10	GO:0006898	biological_process	receptor-mediated endocytosis
B0511.10	GO:0009792	biological_process	embryonic development ending in birth or egg hatching
B0511.10	GO:0040007	biological_process	growth
B0511.10	GO:0040035	biological_process	hermaphrodite genitalia development
B0511.12	GO:0040011	biological_process	locomotion
B0511.4	GO:0006468	biological_process	protein amino acid phosphorylation
B0511.6	GO:0002119	biological_process	nematode larval development
B0511.6	GO:0008340	biological_process	determination of adult life span
B0511.6	GO:0040007	biological_process	growth
B0513.2	GO:0009792	biological_process	embryonic development ending in birth or egg hatching
B0513.3	GO:0006412	biological_process	translation
B0513.5	GO:0006537	biological_process	glutamate biosynthetic process
B0513.5	GO:0006562	biological_process	proline catabolic process
B0513.5	GO:0055114	biological_process	oxidation reduction
B0513.9	GO:0016192	biological_process	vesicle-mediated transport
B0523.5	GO:0008406	biological_process	gonad development
B0523.5	GO:0010171	biological_process	body morphogenesis
B0524.2	GO:0006629	biological_process	lipid metabolic process
B0524.2	GO:0009790	biological_process	embryonic development
B0545.1	GO:0000003	biological_process	reproduction
B0545.1	GO:0006468	biological_process	protein amino acid phosphorylation
B0545.1	GO:0007242	biological_process	intracellular signaling cascade
B0545.1	GO:0008340	biological_process	determination of adult life span
B0545.1	GO:0009792	biological_process	embryonic development ending in birth or egg hatching
B0545.1	GO:0033554	biological_process	cellular response to stress
B0545.4	GO:0000003	biological_process	reproduction
B0545.4	GO:0009792	biological_process	embryonic development ending in birth or egg hatching
B0547.1	GO:0000003	biological_process	reproduction
B0547.1	GO:0000910	biological_process	cytokinesis
B0547.1	GO:0002119	biological_process	nematode larval development
B0547.1	GO:0008406	biological_process	gonad development
B0547.1	GO:0009792	biological_process	embryonic development ending in birth or egg hatching
B0547.1	GO:0040007	biological_process	growth
B0547.1	GO:0040035	biological_process	hermaphrodite genitalia development
B0547.1	GO:0048477	biological_process	oogenesis
B0554.5	GO:0055085	biological_process	transmembrane transport
B0554.7	GO:0019915	biological_process	lipid storage
B0564.1	GO:0002119	biological_process	nematode larval development
B0564.1	GO:0006396	biological_process	RNA processing
B0564.1	GO:0008406	biological_process	gonad development
B0564.1	GO:0009792	biological_process	embryonic development ending in birth or egg hatching
B0564.1	GO:0010171	biological_process	body morphogenesis
B0564.1	GO:0040007	biological_process	growth
B0564.1	GO:0040010	biological_process	positive regulation of growth rate
B0564.1	GO:0040018	biological_process	positive regulation of multicellular organism growth
B0564.10	GO:0006355	biological_process	regulation of transcription, DNA-dependent
B0564.10	GO:0040011	biological_process	locomotion
B0564.10	GO:0045449	biological_process	regulation of transcription
B0564.10	GO:0045944	biological_process	positive regulation of transcription from RNA polymerase II promoter
BE0003N10.1	GO:0006396	biological_process	RNA processing
BE0003N10.1	GO:0006402	biological_process	mRNA catabolic process
BE0003N10.2	GO:0007165	biological_process	signal transduction
BE0003N10.2	GO:0007242	biological_process	intracellular signaling cascade
BE10.2	GO:0006633	biological_process	fatty acid biosynthetic process
BE10.2	GO:0008340	biological_process	determination of adult life span
BE10.2	GO:0009790	biological_process	embryonic development
BE10.2	GO:0055114	biological_process	oxidation reduction
C01A2.3	GO:0002119	biological_process	nematode larval development
C01A2.3	GO:0006898	biological_process	receptor-mediated endocytosis
C01A2.3	GO:0009792	biological_process	embryonic development ending in birth or egg hatching
C01A2.3	GO:0040007	biological_process	growth
C01A2.3	GO:0040010	biological_process	positive regulation of growth rate
C01A2.3	GO:0051205	biological_process	protein insertion into membrane
C01A2.4	GO:0015031	biological_process	protein transport
C01A2.5	GO:0002119	biological_process	nematode larval development
C01A2.5	GO:0006898	biological_process	receptor-mediated endocytosis
C01A2.5	GO:0009792	biological_process	embryonic development ending in birth or egg hatching
C01A2.5	GO:0010171	biological_process	body morphogenesis
C01A2.5	GO:0040007	biological_process	growth
C01A2.5	GO:0040010	biological_process	positive regulation of growth rate
C01A2.5	GO:0040011	biological_process	locomotion
C01B10.8	GO:0008152	biological_process	metabolic process
C01B10.9	GO:0008152	biological_process	metabolic process
C01B12.1	GO:0010171	biological_process	body morphogenesis
C01B4.6	GO:0005975	biological_process	carbohydrate metabolic process
C01B4.6	GO:0019318	biological_process	hexose metabolic process
C01B4.9	GO:0055085	biological_process	transmembrane transport
C01B7.4	GO:0009792	biological_process	embryonic development ending in birth or egg hatching
C01B7.4	GO:0040010	biological_process	positive regulation of growth rate
C01B7.6	GO:0006915	biological_process	apoptosis
C01B7.6	GO:0010171	biological_process	body morphogenesis
C01B7.6	GO:0018991	biological_process	oviposition
C01B7.6	GO:0031647	biological_process	regulation of protein stability
C01B7.6	GO:0040011	biological_process	locomotion
C01B7.6	GO:0043409	biological_process	negative regulation of MAPKKK cascade
C01B7.6	GO:0050807	biological_process	regulation of synapse organization
C01C10.3	GO:0008152	biological_process	metabolic process
C01C10.3	GO:0019915	biological_process	lipid storage
C01C4.3	GO:0006468	biological_process	protein amino acid phosphorylation
C01F1.1	GO:0000003	biological_process	reproduction
C01F1.1	GO:0006898	biological_process	receptor-mediated endocytosis
C01F1.1	GO:0008340	biological_process	determination of adult life span
C01F1.1	GO:0009792	biological_process	embryonic development ending in birth or egg hatching
C01F1.1	GO:0040010	biological_process	positive regulation of growth rate
C01F1.1	GO:0040035	biological_process	hermaphrodite genitalia development
C01F1.2	GO:0000003	biological_process	reproduction
C01F1.2	GO:0002119	biological_process	nematode larval development
C01F1.2	GO:0006898	biological_process	receptor-mediated endocytosis
C01F1.2	GO:0009792	biological_process	embryonic development ending in birth or egg hatching
C01F1.2	GO:0040007	biological_process	growth
C01F1.2	GO:0040035	biological_process	hermaphrodite genitalia development
C01F1.3	GO:0002119	biological_process	nematode larval development
C01F1.3	GO:0006694	biological_process	steroid biosynthetic process
C01F1.3	GO:0008152	biological_process	metabolic process
C01F1.3	GO:0009058	biological_process	biosynthetic process
C01F1.3	GO:0018991	biological_process	oviposition
C01F1.3	GO:0040007	biological_process	growth
C01F1.3	GO:0040011	biological_process	locomotion
C01F1.3	GO:0044237	biological_process	cellular metabolic process
C01F1.3	GO:0045226	biological_process	extracellular polysaccharide biosynthetic process
C01F4.2	GO:0007165	biological_process	signal transduction
C01F4.2	GO:0040010	biological_process	positive regulation of growth rate
C01F6.5	GO:0040011	biological_process	locomotion
C01F6.6	GO:0008340	biological_process	determination of adult life span
C01F6.8	GO:0000003	biological_process	reproduction
C01F6.8	GO:0002119	biological_process	nematode larval development
C01F6.8	GO:0006821	biological_process	chloride transport
C01F6.8	GO:0006884	biological_process	cell volume homeostasis
C01F6.8	GO:0006898	biological_process	receptor-mediated endocytosis
C01F6.8	GO:0009792	biological_process	embryonic development ending in birth or egg hatching
C01F6.8	GO:0040007	biological_process	growth
C01F6.8	GO:0040010	biological_process	positive regulation of growth rate
C01F6.8	GO:0040011	biological_process	locomotion
C01F6.9	GO:0040010	biological_process	positive regulation of growth rate
C01G10.10	GO:0006508	biological_process	proteolysis
C01G10.11	GO:0007413	biological_process	axonal fasciculation
C01G10.11	GO:0030516	biological_process	regulation of axon extension
C01G10.11	GO:0040011	biological_process	locomotion
C01G10.11	GO:0048675	biological_process	axon extension
C01G10.7	GO:0006725	biological_process	cellular aromatic compound metabolic process
C01G10.8	GO:0006950	biological_process	response to stress
C01G10.9	GO:0044237	biological_process	cellular metabolic process
C01G10.9	GO:0044249	biological_process	cellular biosynthetic process
C01G12.5	GO:0008152	biological_process	metabolic process
C01G12.5	GO:0009239	biological_process	enterobactin biosynthetic process
C01G12.5	GO:0009396	biological_process	folic acid and derivative biosynthetic process
C01G12.5	GO:0040010	biological_process	positive regulation of growth rate
C01G12.5	GO:0055114	biological_process	oxidation reduction
C01G12.8	GO:0006754	biological_process	ATP biosynthetic process
C01G12.8	GO:0006812	biological_process	cation transport
C01G12.8	GO:0008152	biological_process	metabolic process
C01G12.8	GO:0015672	biological_process	monovalent inorganic cation transport
C01G5.2	GO:0009792	biological_process	embryonic development ending in birth or egg hatching
C01G5.5	GO:0009792	biological_process	embryonic development ending in birth or egg hatching
C01G5.5	GO:0055114	biological_process	oxidation reduction
C01G5.6	GO:0006508	biological_process	proteolysis
C01G6.1	GO:0006810	biological_process	transport
C01G6.1	GO:0006833	biological_process	water transport
C01G6.1	GO:0055085	biological_process	transmembrane transport
C01G6.6	GO:0055114	biological_process	oxidation reduction
C01G6.7	GO:0008152	biological_process	metabolic process
C01G6.8	GO:0005975	biological_process	carbohydrate metabolic process
C01G6.8	GO:0006468	biological_process	protein amino acid phosphorylation
C01G6.8	GO:0007169	biological_process	transmembrane receptor protein tyrosine kinase signaling pathway
C01G6.8	GO:0007411	biological_process	axon guidance
C01G6.8	GO:0016477	biological_process	cell migration
C01G6.8	GO:0040011	biological_process	locomotion
C01G6.8	GO:0040035	biological_process	hermaphrodite genitalia development
C01G6.8	GO:0045200	biological_process	establishment of neuroblast polarity
C01G8.2	GO:0008340	biological_process	determination of adult life span
C01G8.2	GO:0009792	biological_process	embryonic development ending in birth or egg hatching
C01G8.2	GO:0046662	biological_process	regulation of oviposition
C01G8.3	GO:0008152	biological_process	metabolic process
C01G8.3	GO:0044237	biological_process	cellular metabolic process
C01G8.3	GO:0055114	biological_process	oxidation reduction
C01G8.4	GO:0006457	biological_process	protein folding
C01G8.5	GO:0000003	biological_process	reproduction
C01G8.5	GO:0002009	biological_process	morphogenesis of an epithelium
C01G8.5	GO:0002119	biological_process	nematode larval development
C01G8.5	GO:0006898	biological_process	receptor-mediated endocytosis
C01G8.5	GO:0007015	biological_process	actin filament organization
C01G8.5	GO:0008340	biological_process	determination of adult life span
C01G8.5	GO:0009792	biological_process	embryonic development ending in birth or egg hatching
C01G8.5	GO:0010171	biological_process	body morphogenesis
C01G8.5	GO:0035148	biological_process	tube lumen formation
C01G8.5	GO:0040007	biological_process	growth
C01G8.5	GO:0040010	biological_process	positive regulation of growth rate
C01G8.5	GO:0040011	biological_process	locomotion
C01G8.5	GO:0040039	biological_process	inductive cell migration
C01G8.9	GO:0000003	biological_process	reproduction
C01G8.9	GO:0001703	biological_process	gastrulation with mouth forming first
C01G8.9	GO:0002009	biological_process	morphogenesis of an epithelium
C01G8.9	GO:0002119	biological_process	nematode larval development
C01G8.9	GO:0006898	biological_process	receptor-mediated endocytosis
C01G8.9	GO:0007369	biological_process	gastrulation
C01G8.9	GO:0009792	biological_process	embryonic development ending in birth or egg hatching
C01G8.9	GO:0009795	biological_process	embryonic development
C01G8.9	GO:0010171	biological_process	body morphogenesis
C01G8.9	GO:0018991	biological_process	oviposition
C01G8.9	GO:0040010	biological_process	positive regulation of growth rate
C01G8.9	GO:0040035	biological_process	hermaphrodite genitalia development
C01H6.2	GO:0002009	biological_process	morphogenesis of an epithelium
C01H6.2	GO:0002119	biological_process	nematode larval development
C01H6.2	GO:0040007	biological_process	growth
C01H6.2	GO:0040035	biological_process	hermaphrodite genitalia development
C01H6.4	GO:0008152	biological_process	metabolic process
C01H6.4	GO:0055114	biological_process	oxidation reduction
C01H6.5	GO:0000003	biological_process	reproduction
C01H6.5	GO:0002119	biological_process	nematode larval development
C01H6.5	GO:0006355	biological_process	regulation of transcription, DNA-dependent
C01H6.5	GO:0010171	biological_process	body morphogenesis
C01H6.5	GO:0018991	biological_process	oviposition
C01H6.5	GO:0018996	biological_process	molting cycle, collagen and cuticulin-based cuticle
C01H6.5	GO:0040007	biological_process	growth
C01H6.5	GO:0040011	biological_process	locomotion
C01H6.5	GO:0040018	biological_process	positive regulation of multicellular organism growth
C01H6.7	GO:0000003	biological_process	reproduction
C01H6.7	GO:0002119	biological_process	nematode larval development
C01H6.7	GO:0009792	biological_process	embryonic development ending in birth or egg hatching
C01H6.7	GO:0010171	biological_process	body morphogenesis
C01H6.7	GO:0040010	biological_process	positive regulation of growth rate
C01H6.9	GO:0006468	biological_process	protein amino acid phosphorylation
C02B10.1	GO:0008152	biological_process	metabolic process
C02B10.1	GO:0055114	biological_process	oxidation reduction
C02B10.2	GO:0009792	biological_process	embryonic development ending in birth or egg hatching
C02B10.5	GO:0000003	biological_process	reproduction
C02B10.5	GO:0009792	biological_process	embryonic development ending in birth or egg hatching
C02B10.5	GO:0010171	biological_process	body morphogenesis
C02B8.4	GO:0018991	biological_process	oviposition
C02B8.4	GO:0040010	biological_process	positive regulation of growth rate
C02B8.4	GO:0045449	biological_process	regulation of transcription
C02C2.1	GO:0008152	biological_process	metabolic process
C02C2.1	GO:0009790	biological_process	embryonic development
C02C2.5	GO:0009790	biological_process	embryonic development
C02C6.1	GO:0000003	biological_process	reproduction
C02C6.1	GO:0002119	biological_process	nematode larval development
C02C6.1	GO:0006897	biological_process	endocytosis
C02C6.1	GO:0006898	biological_process	receptor-mediated endocytosis
C02C6.1	GO:0007281	biological_process	germ cell development
C02C6.1	GO:0008219	biological_process	cell death
C02C6.1	GO:0009790	biological_process	embryonic development
C02C6.1	GO:0009792	biological_process	embryonic development ending in birth or egg hatching
C02C6.1	GO:0018996	biological_process	molting cycle, collagen and cuticulin-based cuticle
C02C6.1	GO:0040007	biological_process	growth
C02C6.1	GO:0040010	biological_process	positive regulation of growth rate
C02C6.1	GO:0040011	biological_process	locomotion
C02C6.1	GO:0040039	biological_process	inductive cell migration
C02C6.1	GO:0043652	biological_process	engulfment of apoptotic cell
C02D4.2	GO:0007186	biological_process	G-protein coupled receptor protein signaling pathway
C02D4.2	GO:0007212	biological_process	dopamine receptor signaling pathway
C02D5.2	GO:0009790	biological_process	embryonic development
C02D5.3	GO:0008152	biological_process	metabolic process
C02D5.3	GO:0009790	biological_process	embryonic development
C02E7.1	GO:0006754	biological_process	ATP biosynthetic process
C02E7.1	GO:0006810	biological_process	transport
C02E7.1	GO:0006812	biological_process	cation transport
C02E7.1	GO:0008152	biological_process	metabolic process
C02F12.4	GO:0035023	biological_process	regulation of Rho protein signal transduction
C02F4.1	GO:0016477	biological_process	cell migration
C02F4.1	GO:0040039	biological_process	inductive cell migration
C02F4.1	GO:0043652	biological_process	engulfment of apoptotic cell
C02F4.2	GO:0006935	biological_process	chemotaxis
C02F4.2	GO:0006972	biological_process	hyperosmotic response
C02F4.2	GO:0007635	biological_process	chemosensory behavior
C02F4.2	GO:0008355	biological_process	olfactory learning
C02F4.2	GO:0010468	biological_process	regulation of gene expression
C02F4.2	GO:0019915	biological_process	lipid storage
C02F4.2	GO:0040010	biological_process	positive regulation of growth rate
C02F4.2	GO:0040011	biological_process	locomotion
C02F4.2	GO:0040018	biological_process	positive regulation of multicellular organism growth
C02F4.2	GO:0040024	biological_process	dauer larval development
C02F4.2	GO:0040040	biological_process	thermosensory behavior
C02F4.2	GO:0042048	biological_process	olfactory behavior
C02F4.2	GO:0043052	biological_process	thermotaxis
C02F5.3	GO:0009790	biological_process	embryonic development
C02F5.3	GO:0015684	biological_process	ferrous iron transport
C02F5.4	GO:0006396	biological_process	RNA processing
C02F5.4	GO:0009790	biological_process	embryonic development
C02F5.4	GO:0031124	biological_process	mRNA 3'-end processing
C02F5.6	GO:0009790	biological_process	embryonic development
C02F5.7	GO:0009790	biological_process	embryonic development
C02F5.9	GO:0000003	biological_process	reproduction
C02F5.9	GO:0002119	biological_process	nematode larval development
C02F5.9	GO:0008340	biological_process	determination of adult life span
C02F5.9	GO:0009790	biological_process	embryonic development
C02F5.9	GO:0009792	biological_process	embryonic development ending in birth or egg hatching
C02F5.9	GO:0010171	biological_process	body morphogenesis
C02F5.9	GO:0018991	biological_process	oviposition
C02F5.9	GO:0040007	biological_process	growth
C02F5.9	GO:0040011	biological_process	locomotion
C02F5.9	GO:0051603	biological_process	proteolysis involved in cellular protein catabolic process
C02G6.1	GO:0006508	biological_process	proteolysis
C02G6.2	GO:0006508	biological_process	proteolysis
C02H6.1	GO:0006486	biological_process	protein amino acid glycosylation
C02H7.1	GO:0006461	biological_process	protein complex assembly
C02H7.1	GO:0006935	biological_process	chemotaxis
C02H7.1	GO:0006972	biological_process	hyperosmotic response
C02H7.1	GO:0035058	biological_process	sensory cilium assembly
C02H7.1	GO:0042073	biological_process	intraflagellar transport
C02H7.1	GO:0043053	biological_process	dauer entry
C02H7.1	GO:0045184	biological_process	establishment of protein localization
C02H7.1	GO:0048609	biological_process	reproductive process in a multicellular organism
C02H7.1	GO:0055088	biological_process	lipid homeostasis
C02H7.3	GO:0007268	biological_process	synaptic transmission
C02H7.3	GO:0007618	biological_process	mating
C02H7.3	GO:0008340	biological_process	determination of adult life span
C02H7.3	GO:0018991	biological_process	oviposition
C02H7.3	GO:0030421	biological_process	defecation
C03B8.4	GO:0000003	biological_process	reproduction
C03B8.4	GO:0002119	biological_process	nematode larval development
C03B8.4	GO:0010171	biological_process	body morphogenesis
C03B8.4	GO:0040007	biological_process	growth
C03B8.4	GO:0040025	biological_process	vulval development
C03B8.4	GO:0040027	biological_process	negative regulation of vulval development
C03B8.4	GO:0040035	biological_process	hermaphrodite genitalia development
C03C10.1	GO:0000003	biological_process	reproduction
C03C10.1	GO:0006468	biological_process	protein amino acid phosphorylation
C03C10.1	GO:0007052	biological_process	mitotic spindle organization
C03C10.1	GO:0009792	biological_process	embryonic development ending in birth or egg hatching
C03C10.1	GO:0040010	biological_process	positive regulation of growth rate
C03C10.3	GO:0000003	biological_process	reproduction
C03C10.3	GO:0002009	biological_process	morphogenesis of an epithelium
C03C10.3	GO:0006898	biological_process	receptor-mediated endocytosis
C03C10.3	GO:0007276	biological_process	gamete generation
C03C10.3	GO:0008340	biological_process	determination of adult life span
C03C10.3	GO:0009186	biological_process	deoxyribonucleoside diphosphate metabolic process
C03C10.3	GO:0009790	biological_process	embryonic development
C03C10.3	GO:0009792	biological_process	embryonic development ending in birth or egg hatching
C03C10.3	GO:0030728	biological_process	ovulation
C03C10.3	GO:0040010	biological_process	positive regulation of growth rate
C03C10.3	GO:0040035	biological_process	hermaphrodite genitalia development
C03C10.3	GO:0055114	biological_process	oxidation reduction
C03C10.4	GO:0009790	biological_process	embryonic development
C03C11.2	GO:0000003	biological_process	reproduction
C03C11.2	GO:0001708	biological_process	cell fate specification
C03C11.2	GO:0006898	biological_process	receptor-mediated endocytosis
C03C11.2	GO:0007286	biological_process	spermatid development
C03C11.2	GO:0040010	biological_process	positive regulation of growth rate
C03C11.2	GO:0040020	biological_process	regulation of meiosis
C03C11.2	GO:0042006	biological_process	masculinization of hermaphroditic germ-line
C03C11.2	GO:0042127	biological_process	regulation of cell proliferation
C03D6.3	GO:0000003	biological_process	reproduction
C03D6.3	GO:0002009	biological_process	morphogenesis of an epithelium
C03D6.3	GO:0002119	biological_process	nematode larval development
C03D6.3	GO:0006260	biological_process	DNA replication
C03D6.3	GO:0006281	biological_process	DNA repair
C03D6.3	GO:0006310	biological_process	DNA recombination
C03D6.3	GO:0006370	biological_process	mRNA capping
C03D6.3	GO:0006397	biological_process	mRNA processing
C03D6.3	GO:0006470	biological_process	protein amino acid dephosphorylation
C03D6.3	GO:0006898	biological_process	receptor-mediated endocytosis
C03D6.3	GO:0008340	biological_process	determination of adult life span
C03D6.3	GO:0009792	biological_process	embryonic development ending in birth or egg hatching
C03D6.3	GO:0010171	biological_process	body morphogenesis
C03D6.3	GO:0016311	biological_process	dephosphorylation
C03D6.3	GO:0018996	biological_process	molting cycle, collagen and cuticulin-based cuticle
C03D6.3	GO:0019915	biological_process	lipid storage
C03D6.3	GO:0040007	biological_process	growth
C03D6.3	GO:0040010	biological_process	positive regulation of growth rate
C03D6.3	GO:0040011	biological_process	locomotion
C03D6.3	GO:0040017	biological_process	positive regulation of locomotion
C03D6.4	GO:0009792	biological_process	embryonic development ending in birth or egg hatching
C03D6.5	GO:0006333	biological_process	chromatin assembly or disassembly
C03D6.8	GO:0000003	biological_process	reproduction
C03D6.8	GO:0002119	biological_process	nematode larval development
C03D6.8	GO:0006412	biological_process	translation
C03D6.8	GO:0006898	biological_process	receptor-mediated endocytosis
C03D6.8	GO:0009792	biological_process	embryonic development ending in birth or egg hatching
C03D6.8	GO:0010171	biological_process	body morphogenesis
C03D6.8	GO:0040007	biological_process	growth
C03D6.8	GO:0040010	biological_process	positive regulation of growth rate
C03D6.8	GO:0040035	biological_process	hermaphrodite genitalia development
C03E10.4	GO:0009312	biological_process	oligosaccharide biosynthetic process
C03F11.1	GO:0006813	biological_process	potassium ion transport
C03F11.3	GO:0007155	biological_process	cell adhesion
C03G5.1	GO:0002119	biological_process	nematode larval development
C03G5.1	GO:0006099	biological_process	tricarboxylic acid cycle
C03G5.1	GO:0009792	biological_process	embryonic development ending in birth or egg hatching
C03G5.1	GO:0010171	biological_process	body morphogenesis
C03G5.1	GO:0018991	biological_process	oviposition
C03G5.1	GO:0022900	biological_process	electron transport chain
C03G5.1	GO:0040007	biological_process	growth
C03G5.1	GO:0040010	biological_process	positive regulation of growth rate
C03G5.1	GO:0055114	biological_process	oxidation reduction
C03G6.14	GO:0009410	biological_process	response to xenobiotic stimulus
C03G6.14	GO:0055114	biological_process	oxidation reduction
C03G6.15	GO:0009410	biological_process	response to xenobiotic stimulus
C03G6.15	GO:0055114	biological_process	oxidation reduction
C03H5.2	GO:0000003	biological_process	reproduction
C03H5.2	GO:0008406	biological_process	gonad development
C03H5.2	GO:0008643	biological_process	carbohydrate transport
C03H5.2	GO:0015780	biological_process	nucleotide-sugar transport
C03H5.2	GO:0016477	biological_process	cell migration
C03H5.2	GO:0055085	biological_process	transmembrane transport
C03H5.4	GO:0006644	biological_process	phospholipid metabolic process
C03H5.4	GO:0016042	biological_process	lipid catabolic process
C04A11.3	GO:0000003	biological_process	reproduction
C04A11.3	GO:0002119	biological_process	nematode larval development
C04A11.3	GO:0006468	biological_process	protein amino acid phosphorylation
C04A11.3	GO:0010171	biological_process	body morphogenesis
C04A11.3	GO:0040007	biological_process	growth
C04A11.3	GO:0040010	biological_process	positive regulation of growth rate
C04A11.3	GO:0040011	biological_process	locomotion
C04A11.4	GO:0006508	biological_process	proteolysis
C04A2.1	GO:0032313	biological_process	regulation of Rab GTPase activity
C04A2.3	GO:0000003	biological_process	reproduction
C04A2.3	GO:0001708	biological_process	cell fate specification
C04A2.3	GO:0002009	biological_process	morphogenesis of an epithelium
C04A2.3	GO:0002119	biological_process	nematode larval development
C04A2.3	GO:0006355	biological_process	regulation of transcription, DNA-dependent
C04A2.3	GO:0006357	biological_process	regulation of transcription from RNA polymerase II promoter
C04A2.3	GO:0007155	biological_process	cell adhesion
C04A2.3	GO:0007498	biological_process	mesoderm development
C04A2.3	GO:0008340	biological_process	determination of adult life span
C04A2.3	GO:0008544	biological_process	epidermis development
C04A2.3	GO:0009786	biological_process	regulation of asymmetric cell division
C04A2.3	GO:0009792	biological_process	embryonic development ending in birth or egg hatching
C04A2.3	GO:0010171	biological_process	body morphogenesis
C04A2.3	GO:0016055	biological_process	Wnt receptor signaling pathway
C04A2.3	GO:0018991	biological_process	oviposition
C04A2.3	GO:0030334	biological_process	regulation of cell migration
C04A2.3	GO:0040007	biological_process	growth
C04A2.3	GO:0040010	biological_process	positive regulation of growth rate
C04A2.3	GO:0040011	biological_process	locomotion
C04A2.3	GO:0045138	biological_process	tail tip morphogenesis
C04C3.2	GO:0006810	biological_process	transport
C04C3.2	GO:0006811	biological_process	ion transport
C04C3.3	GO:0008152	biological_process	metabolic process
C04C3.3	GO:0009792	biological_process	embryonic development ending in birth or egg hatching
C04C3.3	GO:0040010	biological_process	positive regulation of growth rate
C04C3.5	GO:0040017	biological_process	positive regulation of locomotion
C04D8.1	GO:0007165	biological_process	signal transduction
C04D8.1	GO:0008105	biological_process	asymmetric protein localization
C04D8.1	GO:0009790	biological_process	embryonic development
C04D8.1	GO:0010470	biological_process	regulation of gastrulation
C04E12.12	GO:0007165	biological_process	signal transduction
C04E12.12	GO:0007600	biological_process	sensory perception
C04F1.3	GO:0002119	biological_process	nematode larval development
C04F1.3	GO:0006355	biological_process	regulation of transcription, DNA-dependent
C04F1.3	GO:0007588	biological_process	excretion
C04F1.3	GO:0010171	biological_process	body morphogenesis
C04F1.3	GO:0035262	biological_process	gonad morphogenesis
C04F1.3	GO:0040011	biological_process	locomotion
C04F1.3	GO:0045449	biological_process	regulation of transcription
C04F1.3	GO:0060323	biological_process	head morphogenesis
C04F12.10	GO:0006508	biological_process	proteolysis
C04F12.3	GO:0007165	biological_process	signal transduction
C04F12.3	GO:0040010	biological_process	positive regulation of growth rate
C04F12.4	GO:0000003	biological_process	reproduction
C04F12.4	GO:0002119	biological_process	nematode larval development
C04F12.4	GO:0006412	biological_process	translation
C04F12.4	GO:0009792	biological_process	embryonic development ending in birth or egg hatching
C04F12.4	GO:0018996	biological_process	molting cycle, collagen and cuticulin-based cuticle
C04F12.4	GO:0040007	biological_process	growth
C04F12.4	GO:0040010	biological_process	positive regulation of growth rate
C04F12.8	GO:0006470	biological_process	protein amino acid dephosphorylation
C04F12.8	GO:0016311	biological_process	dephosphorylation
C04F5.1	GO:0016246	biological_process	RNA interference
C04F5.1	GO:0033227	biological_process	dsRNA transport
C04F6.3	GO:0005975	biological_process	carbohydrate metabolic process
C04F6.3	GO:0006030	biological_process	chitin metabolic process
C04F6.3	GO:0006032	biological_process	chitin catabolic process
C04F6.3	GO:0009792	biological_process	embryonic development ending in birth or egg hatching
C04F6.4	GO:0002119	biological_process	nematode larval development
C04F6.4	GO:0018991	biological_process	oviposition
C04F6.4	GO:0030240	biological_process	muscle thin filament assembly
C04F6.4	GO:0030836	biological_process	positive regulation of actin filament depolymerization
C04F6.4	GO:0030837	biological_process	negative regulation of actin filament polymerization
C04F6.4	GO:0040010	biological_process	positive regulation of growth rate
C04F6.4	GO:0040011	biological_process	locomotion
C04F6.4	GO:0040012	biological_process	regulation of locomotion
C04F6.4	GO:0040017	biological_process	positive regulation of locomotion
C04F6.4	GO:0051016	biological_process	barbed-end actin filament capping
C04G2.6	GO:0000003	biological_process	reproduction
C04G2.6	GO:0006355	biological_process	regulation of transcription, DNA-dependent
C04G2.6	GO:0040010	biological_process	positive regulation of growth rate
C04G2.6	GO:0040018	biological_process	positive regulation of multicellular organism growth
C04G2.7	GO:0002119	biological_process	nematode larval development
C04G2.7	GO:0006915	biological_process	apoptosis
C04G2.7	GO:0018991	biological_process	oviposition
C04G2.7	GO:0030421	biological_process	defecation
C04G2.7	GO:0040017	biological_process	positive regulation of locomotion
C04G2.7	GO:0040025	biological_process	vulval development
C04G2.7	GO:0045165	biological_process	cell fate commitment
C04G2.7	GO:0045449	biological_process	regulation of transcription
C04G6.1	GO:0006468	biological_process	protein amino acid phosphorylation
C04G6.10	GO:0006952	biological_process	defense response
C04G6.3	GO:0007154	biological_process	cell communication
C04G6.3	GO:0008152	biological_process	metabolic process
C04G6.7	GO:0006952	biological_process	defense response
C04H5.6	GO:0000003	biological_process	reproduction
C04H5.6	GO:0002119	biological_process	nematode larval development
C04H5.6	GO:0006810	biological_process	transport
C04H5.6	GO:0007281	biological_process	germ cell development
C04H5.6	GO:0009792	biological_process	embryonic development ending in birth or egg hatching
C04H5.6	GO:0010172	biological_process	embryonic body morphogenesis
C04H5.6	GO:0018996	biological_process	molting cycle, collagen and cuticulin-based cuticle
C04H5.6	GO:0040007	biological_process	growth
C04H5.6	GO:0040010	biological_process	positive regulation of growth rate
C04H5.6	GO:0040022	biological_process	feminization of hermaphroditic germ-line
C04H5.6	GO:0040026	biological_process	positive regulation of vulval development
C04H5.6	GO:0040035	biological_process	hermaphrodite genitalia development
C04H5.6	GO:0048589	biological_process	developmental growth
C05A9.1	GO:0006810	biological_process	transport
C05A9.1	GO:0055085	biological_process	transmembrane transport
C05B10.1	GO:0006470	biological_process	protein amino acid dephosphorylation
C05B10.1	GO:0007219	biological_process	Notch signaling pathway
C05B10.1	GO:0007281	biological_process	germ cell development
C05B10.1	GO:0009792	biological_process	embryonic development ending in birth or egg hatching
C05B10.1	GO:0040028	biological_process	regulation of vulval development
C05B10.1	GO:0042659	biological_process	regulation of cell fate specification
C05B10.1	GO:0043407	biological_process	negative regulation of MAP kinase activity
C05B10.1	GO:0046580	biological_process	negative regulation of Ras protein signal transduction
C05B10.1	GO:0048599	biological_process	oocyte development
C05B10.1	GO:0051447	biological_process	negative regulation of meiotic cell cycle
C05B5.7	GO:0009790	biological_process	embryonic development
C05C10.3	GO:0008152	biological_process	metabolic process
C05C10.3	GO:0046952	biological_process	ketone body catabolic process
C05C10.6	GO:0009792	biological_process	embryonic development ending in birth or egg hatching
C05C10.6	GO:0040010	biological_process	positive regulation of growth rate
C05C12.3	GO:0000003	biological_process	reproduction
C05C12.3	GO:0002119	biological_process	nematode larval development
C05C12.3	GO:0006811	biological_process	ion transport
C05C12.3	GO:0030421	biological_process	defecation
C05C12.3	GO:0040007	biological_process	growth
C05C12.3	GO:0040010	biological_process	positive regulation of growth rate
C05C12.3	GO:0055085	biological_process	transmembrane transport
C05C8.2	GO:0002119	biological_process	nematode larval development
C05C8.2	GO:0010171	biological_process	body morphogenesis
C05C8.2	GO:0018991	biological_process	oviposition
C05C8.2	GO:0040007	biological_process	growth
C05C8.2	GO:0040010	biological_process	positive regulation of growth rate
C05C8.3	GO:0006457	biological_process	protein folding
C05C8.3	GO:0008340	biological_process	determination of adult life span
C05C8.6	GO:0002119	biological_process	nematode larval development
C05C8.6	GO:0007126	biological_process	meiosis
C05C8.6	GO:0009792	biological_process	embryonic development ending in birth or egg hatching
C05C8.6	GO:0040007	biological_process	growth
C05C8.6	GO:0045132	biological_process	meiotic chromosome segregation
C05C8.7	GO:0000003	biological_process	reproduction
C05C8.7	GO:0002119	biological_process	nematode larval development
C05C8.7	GO:0005975	biological_process	carbohydrate metabolic process
C05C8.7	GO:0009792	biological_process	embryonic development ending in birth or egg hatching
C05C8.7	GO:0040007	biological_process	growth
C05C8.7	GO:0040010	biological_process	positive regulation of growth rate
C05C8.9	GO:0042384	biological_process	cilium assembly
C05C8.9	GO:0060756	biological_process	foraging behavior
C05D10.2	GO:0002119	biological_process	nematode larval development
C05D10.2	GO:0006468	biological_process	protein amino acid phosphorylation
C05D10.2	GO:0009790	biological_process	embryonic development
C05D10.2	GO:0009792	biological_process	embryonic development ending in birth or egg hatching
C05D10.2	GO:0040007	biological_process	growth
C05D10.3	GO:0006810	biological_process	transport
C05D10.3	GO:0009790	biological_process	embryonic development
C05D11.10	GO:0000003	biological_process	reproduction
C05D11.10	GO:0002119	biological_process	nematode larval development
C05D11.10	GO:0009790	biological_process	embryonic development
C05D11.10	GO:0009792	biological_process	embryonic development ending in birth or egg hatching
C05D11.10	GO:0040007	biological_process	growth
C05D11.10	GO:0040010	biological_process	positive regulation of growth rate
C05D11.11	GO:0006544	biological_process	glycine metabolic process
C05D11.11	GO:0006563	biological_process	L-serine metabolic process
C05D11.11	GO:0009790	biological_process	embryonic development
C05D11.11	GO:0009792	biological_process	embryonic development ending in birth or egg hatching
C05D11.12	GO:0002119	biological_process	nematode larval development
C05D11.12	GO:0008152	biological_process	metabolic process
C05D11.12	GO:0009790	biological_process	embryonic development
C05D11.12	GO:0009792	biological_process	embryonic development ending in birth or egg hatching
C05D11.12	GO:0010171	biological_process	body morphogenesis
C05D11.12	GO:0040010	biological_process	positive regulation of growth rate
C05D11.12	GO:0055114	biological_process	oxidation reduction
C05D11.2	GO:0002119	biological_process	nematode larval development
C05D11.2	GO:0006886	biological_process	intracellular protein transport
C05D11.2	GO:0008219	biological_process	cell death
C05D11.2	GO:0008340	biological_process	determination of adult life span
C05D11.2	GO:0009792	biological_process	embryonic development ending in birth or egg hatching
C05D11.2	GO:0010171	biological_process	body morphogenesis
C05D11.2	GO:0040007	biological_process	growth
C05D11.2	GO:0040011	biological_process	locomotion
C05D11.3	GO:0000003	biological_process	reproduction
C05D11.3	GO:0000910	biological_process	cytokinesis
C05D11.3	GO:0009792	biological_process	embryonic development ending in birth or egg hatching
C05D11.3	GO:0018991	biological_process	oviposition
C05D11.3	GO:0035046	biological_process	pronuclear migration
C05D11.3	GO:0040002	biological_process	collagen and cuticulin-based cuticle development
C05D11.3	GO:0040011	biological_process	locomotion
C05D11.3	GO:0040035	biological_process	hermaphrodite genitalia development
C05D11.3	GO:0045454	biological_process	cell redox homeostasis
C05D11.3	GO:0046785	biological_process	microtubule polymerization
C05D11.4	GO:0002119	biological_process	nematode larval development
C05D11.4	GO:0008543	biological_process	fibroblast growth factor receptor signaling pathway
C05D11.4	GO:0009790	biological_process	embryonic development
C05D11.4	GO:0031345	biological_process	negative regulation of cell projection organization
C05D11.4	GO:0040010	biological_process	positive regulation of growth rate
C05D11.4	GO:0048841	biological_process	regulation of axon extension involved in axon guidance
C05D11.5	GO:0009790	biological_process	embryonic development
C05D11.6	GO:0006508	biological_process	proteolysis
C05D11.6	GO:0009790	biological_process	embryonic development
C05D11.7	GO:0006629	biological_process	lipid metabolic process
C05D11.7	GO:0009790	biological_process	embryonic development
C05D11.8	GO:0009790	biological_process	embryonic development
C05D11.9	GO:0001682	biological_process	tRNA 5'-leader removal
C05D11.9	GO:0002119	biological_process	nematode larval development
C05D11.9	GO:0006396	biological_process	RNA processing
C05D11.9	GO:0006898	biological_process	receptor-mediated endocytosis
C05D11.9	GO:0009790	biological_process	embryonic development
C05D11.9	GO:0009792	biological_process	embryonic development ending in birth or egg hatching
C05D11.9	GO:0010171	biological_process	body morphogenesis
C05D11.9	GO:0040007	biological_process	growth
C05D11.9	GO:0040010	biological_process	positive regulation of growth rate
C05D12.1	GO:0006548	biological_process	histidine catabolic process
C05D2.1	GO:0002119	biological_process	nematode larval development
C05D2.1	GO:0006468	biological_process	protein amino acid phosphorylation
C05D2.1	GO:0007178	biological_process	transmembrane receptor protein serine/threonine kinase signaling pathway
C05D2.1	GO:0009790	biological_process	embryonic development
C05D2.1	GO:0018991	biological_process	oviposition
C05D2.1	GO:0019915	biological_process	lipid storage
C05D2.1	GO:0030513	biological_process	positive regulation of BMP signaling pathway
C05D2.1	GO:0030514	biological_process	negative regulation of BMP signaling pathway
C05D2.1	GO:0040010	biological_process	positive regulation of growth rate
C05D2.1	GO:0040018	biological_process	positive regulation of multicellular organism growth
C05D2.1	GO:0040024	biological_process	dauer larval development
C05D2.1	GO:0045087	biological_process	innate immune response
C05D2.1	GO:0045944	biological_process	positive regulation of transcription from RNA polymerase II promoter
C05D2.1	GO:0050832	biological_process	defense response to fungus
C05D2.1	GO:0090040	biological_process	positive regulation of gene-specific transcription elongation from RNA polymerase II promoter
C05D9.1	GO:0000003	biological_process	reproduction
C05D9.1	GO:0007126	biological_process	meiosis
C05D9.1	GO:0007154	biological_process	cell communication
C05D9.1	GO:0009792	biological_process	embryonic development ending in birth or egg hatching
C05D9.3	GO:0007155	biological_process	cell adhesion
C05D9.3	GO:0007160	biological_process	cell-matrix adhesion
C05D9.3	GO:0007229	biological_process	integrin-mediated signaling pathway
C05D9.5	GO:0006413	biological_process	translational initiation
C05E11.1	GO:0007626	biological_process	locomotory behavior
C05E11.1	GO:0019915	biological_process	lipid storage
C05E11.1	GO:0040015	biological_process	negative regulation of multicellular organism growth
C05E11.1	GO:0046662	biological_process	regulation of oviposition
C05E11.1	GO:0048489	biological_process	synaptic vesicle transport
C05E11.1	GO:0050803	biological_process	regulation of synapse structure and activity
C05G5.1	GO:0055085	biological_process	transmembrane transport
C05G5.4	GO:0008152	biological_process	metabolic process
C05H8.1	GO:0006350	biological_process	transcription
C05H8.1	GO:0006468	biological_process	protein amino acid phosphorylation
C05H8.1	GO:0009790	biological_process	embryonic development
C05H8.1	GO:0019722	biological_process	calcium-mediated signaling
C05H8.1	GO:0032793	biological_process	positive regulation of CREB transcription factor activity
C05H8.1	GO:0045860	biological_process	positive regulation of protein kinase activity
C06A1.1	GO:0000003	biological_process	reproduction
C06A1.1	GO:0000910	biological_process	cytokinesis
C06A1.1	GO:0002119	biological_process	nematode larval development
C06A1.1	GO:0006281	biological_process	DNA repair
C06A1.1	GO:0006310	biological_process	DNA recombination
C06A1.1	GO:0007126	biological_process	meiosis
C06A1.1	GO:0009792	biological_process	embryonic development ending in birth or egg hatching
C06A1.1	GO:0030968	biological_process	endoplasmic reticulum unfolded protein response
C06A1.1	GO:0040002	biological_process	collagen and cuticulin-based cuticle development
C06A1.1	GO:0040011	biological_process	locomotion
C06A1.1	GO:0040018	biological_process	positive regulation of multicellular organism growth
C06A1.1	GO:0051301	biological_process	cell division
C06A1.5	GO:0000003	biological_process	reproduction
C06A1.5	GO:0006351	biological_process	transcription, DNA-dependent
C06A1.5	GO:0006898	biological_process	receptor-mediated endocytosis
C06A1.5	GO:0009792	biological_process	embryonic development ending in birth or egg hatching
C06A1.6	GO:0006281	biological_process	DNA repair
C06A1.7	GO:0006281	biological_process	DNA repair
C06A5.1	GO:0000003	biological_process	reproduction
C06A5.1	GO:0001703	biological_process	gastrulation with mouth forming first
C06A5.1	GO:0006898	biological_process	receptor-mediated endocytosis
C06A5.1	GO:0007369	biological_process	gastrulation
C06A5.1	GO:0008340	biological_process	determination of adult life span
C06A5.1	GO:0009792	biological_process	embryonic development ending in birth or egg hatching
C06A5.1	GO:0009795	biological_process	embryonic development
C06A5.1	GO:0010171	biological_process	body morphogenesis
C06A5.1	GO:0016246	biological_process	RNA interference
C06A5.1	GO:0040035	biological_process	hermaphrodite genitalia development
C06A5.11	GO:0006342	biological_process	chromatin silencing
C06A5.11	GO:0006476	biological_process	protein amino acid deacetylation
C06A5.11	GO:0045449	biological_process	regulation of transcription
C06A5.3	GO:0000003	biological_process	reproduction
C06A5.3	GO:0006898	biological_process	receptor-mediated endocytosis
C06A5.3	GO:0040035	biological_process	hermaphrodite genitalia development
C06A6.3	GO:0006898	biological_process	receptor-mediated endocytosis
C06A6.3	GO:0030163	biological_process	protein catabolic process
C06A6.4	GO:0006508	biological_process	proteolysis
C06A6.4	GO:0006520	biological_process	cellular amino acid metabolic process
C06A6.4	GO:0008152	biological_process	metabolic process
C06A6.5	GO:0045454	biological_process	cell redox homeostasis
C06A8.1	GO:0006555	biological_process	methionine metabolic process
C06A8.1	GO:0040010	biological_process	positive regulation of growth rate
C06A8.1	GO:0055114	biological_process	oxidation reduction
C06A8.2	GO:0000003	biological_process	reproduction
C06A8.2	GO:0002119	biological_process	nematode larval development
C06A8.2	GO:0009792	biological_process	embryonic development ending in birth or egg hatching
C06A8.2	GO:0040007	biological_process	growth
C06A8.2	GO:0040010	biological_process	positive regulation of growth rate
C06A8.2	GO:0040035	biological_process	hermaphrodite genitalia development
C06A8.9	GO:0006810	biological_process	transport
C06B3.3	GO:0009410	biological_process	response to xenobiotic stimulus
C06B3.3	GO:0055114	biological_process	oxidation reduction
C06B3.4	GO:0008152	biological_process	metabolic process
C06B3.4	GO:0008340	biological_process	determination of adult life span
C06B3.4	GO:0055114	biological_process	oxidation reduction
C06B3.5	GO:0008152	biological_process	metabolic process
C06B3.5	GO:0055114	biological_process	oxidation reduction
C06B3.8	GO:0006182	biological_process	cGMP biosynthetic process
C06B3.8	GO:0007242	biological_process	intracellular signaling cascade
C06B3.8	GO:0009190	biological_process	cyclic nucleotide biosynthetic process
C06B8.3	GO:0008152	biological_process	metabolic process
C06B8.3	GO:0055114	biological_process	oxidation reduction
C06B8.8	GO:0000003	biological_process	reproduction
C06B8.8	GO:0002119	biological_process	nematode larval development
C06B8.8	GO:0006412	biological_process	translation
C06B8.8	GO:0040007	biological_process	growth
C06B8.8	GO:0040010	biological_process	positive regulation of growth rate
C06B8.8	GO:0040035	biological_process	hermaphrodite genitalia development
C06C3.1	GO:0000003	biological_process	reproduction
C06C3.1	GO:0006898	biological_process	receptor-mediated endocytosis
C06C3.1	GO:0009772	biological_process	photosynthetic electron transport in photosystem II
C06C3.1	GO:0009792	biological_process	embryonic development ending in birth or egg hatching
C06C3.1	GO:0019684	biological_process	photosynthesis, light reaction
C06C3.1	GO:0040010	biological_process	positive regulation of growth rate
C06E1.10	GO:0000003	biological_process	reproduction
C06E1.10	GO:0002119	biological_process	nematode larval development
C06E1.10	GO:0006898	biological_process	receptor-mediated endocytosis
C06E1.10	GO:0008340	biological_process	determination of adult life span
C06E1.10	GO:0009792	biological_process	embryonic development ending in birth or egg hatching
C06E1.10	GO:0016246	biological_process	RNA interference
C06E1.10	GO:0040007	biological_process	growth
C06E1.10	GO:0040010	biological_process	positive regulation of growth rate
C06E1.3	GO:0009790	biological_process	embryonic development
C06E1.3	GO:0015031	biological_process	protein transport
C06E1.4	GO:0006810	biological_process	transport
C06E1.4	GO:0006811	biological_process	ion transport
C06E1.4	GO:0007631	biological_process	feeding behavior
C06E1.4	GO:0009612	biological_process	response to mechanical stimulus
C06E1.4	GO:0009790	biological_process	embryonic development
C06E1.4	GO:0019915	biological_process	lipid storage
C06E1.4	GO:0035235	biological_process	ionotropic glutamate receptor signaling pathway
C06E1.4	GO:0050913	biological_process	sensory perception of bitter taste
C06E2.3	GO:0043687	biological_process	post-translational protein modification
C06E2.3	GO:0051246	biological_process	regulation of protein metabolic process
C06E2.7	GO:0043687	biological_process	post-translational protein modification
C06E2.7	GO:0051246	biological_process	regulation of protein metabolic process
C06E4.3	GO:0008152	biological_process	metabolic process
C06E4.3	GO:0009239	biological_process	enterobactin biosynthetic process
C06E4.3	GO:0055114	biological_process	oxidation reduction
C06E4.6	GO:0000003	biological_process	reproduction
C06E4.6	GO:0002119	biological_process	nematode larval development
C06E4.6	GO:0008152	biological_process	metabolic process
C06E4.6	GO:0009239	biological_process	enterobactin biosynthetic process
C06E4.6	GO:0040007	biological_process	growth
C06E4.6	GO:0040018	biological_process	positive regulation of multicellular organism growth
C06E4.6	GO:0040035	biological_process	hermaphrodite genitalia development
C06E4.6	GO:0055114	biological_process	oxidation reduction
C06E7.1	GO:0000003	biological_process	reproduction
C06E7.1	GO:0002009	biological_process	morphogenesis of an epithelium
C06E7.1	GO:0002119	biological_process	nematode larval development
C06E7.1	GO:0006730	biological_process	one-carbon metabolic process
C06E7.1	GO:0006898	biological_process	receptor-mediated endocytosis
C06E7.1	GO:0032940	biological_process	secretion by cell
C06E7.1	GO:0040007	biological_process	growth
C06E7.1	GO:0040010	biological_process	positive regulation of growth rate
C06E7.1	GO:0040011	biological_process	locomotion
C06E7.1	GO:0040017	biological_process	positive regulation of locomotion
C06E7.1	GO:0040035	biological_process	hermaphrodite genitalia development
C06E7.3	GO:0000003	biological_process	reproduction
C06E7.3	GO:0006730	biological_process	one-carbon metabolic process
C06E7.3	GO:0006898	biological_process	receptor-mediated endocytosis
C06E7.3	GO:0019915	biological_process	lipid storage
C06E7.3	GO:0032940	biological_process	secretion by cell
C06E7.3	GO:0040010	biological_process	positive regulation of growth rate
C06E7.3	GO:0040011	biological_process	locomotion
C06E7.3	GO:0040017	biological_process	positive regulation of locomotion
C06E7.3	GO:0040035	biological_process	hermaphrodite genitalia development
C06G3.10	GO:0002119	biological_process	nematode larval development
C06G3.10	GO:0007030	biological_process	Golgi organization
C06G3.10	GO:0009792	biological_process	embryonic development ending in birth or egg hatching
C06G3.10	GO:0015031	biological_process	protein transport
C06G3.10	GO:0030334	biological_process	regulation of cell migration
C06G3.10	GO:0035262	biological_process	gonad morphogenesis
C06G3.10	GO:0040007	biological_process	growth
C06G3.10	GO:0040010	biological_process	positive regulation of growth rate
C06G3.10	GO:0040035	biological_process	hermaphrodite genitalia development
C06G3.10	GO:0040039	biological_process	inductive cell migration
C06G3.10	GO:0048477	biological_process	oogenesis
C06G3.11	GO:0009792	biological_process	embryonic development ending in birth or egg hatching
C06G3.11	GO:0040007	biological_process	growth
C06G3.11	GO:0040011	biological_process	locomotion
C06G3.11	GO:0040018	biological_process	positive regulation of multicellular organism growth
C06G3.11	GO:0040035	biological_process	hermaphrodite genitalia development
C06G3.2	GO:0000910	biological_process	cytokinesis
C06G3.2	GO:0007018	biological_process	microtubule-based movement
C06G3.2	GO:0007126	biological_process	meiosis
C06G3.2	GO:0009792	biological_process	embryonic development ending in birth or egg hatching
C06G3.2	GO:0019915	biological_process	lipid storage
C06G3.2	GO:0045132	biological_process	meiotic chromosome segregation
C06G3.2	GO:0051301	biological_process	cell division
C06G3.5	GO:0009168	biological_process	purine ribonucleoside monophosphate biosynthetic process
C06G3.5	GO:0009792	biological_process	embryonic development ending in birth or egg hatching
C06G3.7	GO:0008152	biological_process	metabolic process
C06G3.7	GO:0045454	biological_process	cell redox homeostasis
C06G3.7	GO:0055114	biological_process	oxidation reduction
C06G4.2	GO:0006508	biological_process	proteolysis
C06G4.2	GO:0008219	biological_process	cell death
C06G4.2	GO:0009790	biological_process	embryonic development
C06G4.5	GO:0007186	biological_process	G-protein coupled receptor protein signaling pathway
C06G4.5	GO:0009790	biological_process	embryonic development
C06G8.2	GO:0006857	biological_process	oligopeptide transport
C06G8.2	GO:0055085	biological_process	transmembrane transport
C06G8.3	GO:0030001	biological_process	metal ion transport
C06G8.3	GO:0055085	biological_process	transmembrane transport
C06H2.1	GO:0000003	biological_process	reproduction
C06H2.1	GO:0002119	biological_process	nematode larval development
C06H2.1	GO:0008340	biological_process	determination of adult life span
C06H2.1	GO:0009792	biological_process	embryonic development ending in birth or egg hatching
C06H2.1	GO:0040007	biological_process	growth
C06H2.1	GO:0040010	biological_process	positive regulation of growth rate
C06H2.1	GO:0040035	biological_process	hermaphrodite genitalia development
C06H2.3	GO:0008152	biological_process	metabolic process
C06H2.3	GO:0034984	biological_process	cellular response to DNA damage stimulus
C06H2.4	GO:0006810	biological_process	transport
C06H2.4	GO:0055085	biological_process	transmembrane transport
C07A12.3	GO:0006355	biological_process	regulation of transcription, DNA-dependent
C07A12.4	GO:0001703	biological_process	gastrulation with mouth forming first
C07A12.4	GO:0002119	biological_process	nematode larval development
C07A12.4	GO:0007369	biological_process	gastrulation
C07A12.4	GO:0009792	biological_process	embryonic development ending in birth or egg hatching
C07A12.4	GO:0009795	biological_process	embryonic development
C07A12.4	GO:0010171	biological_process	body morphogenesis
C07A12.4	GO:0040007	biological_process	growth
C07A12.4	GO:0040010	biological_process	positive regulation of growth rate
C07A12.4	GO:0040011	biological_process	locomotion
C07A12.4	GO:0040017	biological_process	positive regulation of locomotion
C07A12.4	GO:0045454	biological_process	cell redox homeostasis
C07A12.7	GO:0006886	biological_process	intracellular protein transport
C07A4.1	GO:0019722	biological_process	calcium-mediated signaling
C07A9.11	GO:0009790	biological_process	embryonic development
C07A9.11	GO:0055085	biological_process	transmembrane transport
C07A9.2	GO:0000003	biological_process	reproduction
C07A9.2	GO:0002119	biological_process	nematode larval development
C07A9.2	GO:0006898	biological_process	receptor-mediated endocytosis
C07A9.2	GO:0008340	biological_process	determination of adult life span
C07A9.2	GO:0009792	biological_process	embryonic development ending in birth or egg hatching
C07A9.2	GO:0019915	biological_process	lipid storage
C07A9.2	GO:0040007	biological_process	growth
C07A9.2	GO:0040011	biological_process	locomotion
C07A9.2	GO:0040035	biological_process	hermaphrodite genitalia development
C07A9.3	GO:0000003	biological_process	reproduction
C07A9.3	GO:0006468	biological_process	protein amino acid phosphorylation
C07A9.3	GO:0009790	biological_process	embryonic development
C07A9.3	GO:0009792	biological_process	embryonic development ending in birth or egg hatching
C07A9.3	GO:0040018	biological_process	positive regulation of multicellular organism growth
C07A9.4	GO:0009790	biological_process	embryonic development
C07A9.4	GO:0055085	biological_process	transmembrane transport
C07A9.8	GO:0009790	biological_process	embryonic development
C07B5.5	GO:0000737	biological_process	DNA catabolic process, endonucleolytic
C07B5.5	GO:0006259	biological_process	DNA metabolic process
C07B5.5	GO:0006309	biological_process	DNA fragmentation involved in apoptosis
C07B5.5	GO:0008340	biological_process	determination of adult life span
C07D10.2	GO:0000003	biological_process	reproduction
C07D10.4	GO:0006508	biological_process	proteolysis
C07D10.4	GO:0009792	biological_process	embryonic development ending in birth or egg hatching
C07D10.4	GO:0040018	biological_process	positive regulation of multicellular organism growth
C07D8.5	GO:0055114	biological_process	oxidation reduction
C07D8.6	GO:0040011	biological_process	locomotion
C07D8.6	GO:0043050	biological_process	pharyngeal pumping
C07D8.6	GO:0055114	biological_process	oxidation reduction
C07E3.1	GO:0000003	biological_process	reproduction
C07E3.1	GO:0002119	biological_process	nematode larval development
C07E3.1	GO:0009792	biological_process	embryonic development ending in birth or egg hatching
C07E3.1	GO:0009795	biological_process	embryonic development
C07E3.1	GO:0040007	biological_process	growth
C07E3.1	GO:0040011	biological_process	locomotion
C07E3.1	GO:0040035	biological_process	hermaphrodite genitalia development
C07E3.2	GO:0000003	biological_process	reproduction
C07E3.2	GO:0002119	biological_process	nematode larval development
C07E3.2	GO:0006898	biological_process	receptor-mediated endocytosis
C07E3.2	GO:0009792	biological_process	embryonic development ending in birth or egg hatching
C07E3.2	GO:0016246	biological_process	RNA interference
C07E3.2	GO:0019915	biological_process	lipid storage
C07E3.2	GO:0040007	biological_process	growth
C07E3.2	GO:0040010	biological_process	positive regulation of growth rate
C07E3.2	GO:0051729	biological_process	germline cell cycle switching, mitotic to meiotic cell cycle
C07E3.9	GO:0006644	biological_process	phospholipid metabolic process
C07E3.9	GO:0016042	biological_process	lipid catabolic process
C07F11.1	GO:0002119	biological_process	nematode larval development
C07F11.1	GO:0002217	biological_process	defense response
C07F11.1	GO:0007165	biological_process	signal transduction
C07F11.1	GO:0007166	biological_process	cell surface receptor linked signal transduction
C07F11.1	GO:0009790	biological_process	embryonic development
C07F11.1	GO:0009792	biological_process	embryonic development ending in birth or egg hatching
C07F11.1	GO:0010171	biological_process	body morphogenesis
C07F11.1	GO:0040007	biological_process	growth
C07F11.1	GO:0045087	biological_process	innate immune response
C07G1.1	GO:0006508	biological_process	proteolysis
C07G1.3	GO:0006468	biological_process	protein amino acid phosphorylation
C07G1.4	GO:0007411	biological_process	axon guidance
C07G1.4	GO:0010631	biological_process	epithelial cell migration
C07G1.4	GO:0016331	biological_process	morphogenesis of embryonic epithelium
C07G1.4	GO:0034315	biological_process	regulation of Arp2/3 complex-mediated actin nucleation
C07G1.5	GO:0000003	biological_process	reproduction
C07G1.5	GO:0002119	biological_process	nematode larval development
C07G1.5	GO:0006914	biological_process	autophagy
C07G1.5	GO:0009792	biological_process	embryonic development ending in birth or egg hatching
C07G1.5	GO:0010171	biological_process	body morphogenesis
C07G1.5	GO:0018996	biological_process	molting cycle, collagen and cuticulin-based cuticle
C07G1.5	GO:0040007	biological_process	growth
C07G1.5	GO:0040010	biological_process	positive regulation of growth rate
C07G1.5	GO:0040011	biological_process	locomotion
C07G1.8	GO:0045454	biological_process	cell redox homeostasis
C07G2.2	GO:0006355	biological_process	regulation of transcription, DNA-dependent
C07G2.2	GO:0009790	biological_process	embryonic development
C07G2.2	GO:0010552	biological_process	positive regulation of specific transcription from RNA polymerase II promoter
C07G2.2	GO:0010553	biological_process	negative regulation of specific transcription from RNA polymerase II promoter
C07G2.2	GO:0045089	biological_process	positive regulation of innate immune response
C07G2.2	GO:0045824	biological_process	negative regulation of innate immune response
C07G2.2	GO:0050829	biological_process	defense response to Gram-negative bacterium
C07G2.3	GO:0000003	biological_process	reproduction
C07G2.3	GO:0002119	biological_process	nematode larval development
C07G2.3	GO:0006457	biological_process	protein folding
C07G2.3	GO:0006898	biological_process	receptor-mediated endocytosis
C07G2.3	GO:0008340	biological_process	determination of adult life span
C07G2.3	GO:0009792	biological_process	embryonic development ending in birth or egg hatching
C07G2.3	GO:0040007	biological_process	growth
C07G2.3	GO:0040010	biological_process	positive regulation of growth rate
C07G2.3	GO:0040011	biological_process	locomotion
C07G2.3	GO:0040035	biological_process	hermaphrodite genitalia development
C07G2.3	GO:0044267	biological_process	cellular protein metabolic process
C07H4.2	GO:0006821	biological_process	chloride transport
C07H4.2	GO:0055085	biological_process	transmembrane transport
C07H6.1	GO:0006260	biological_process	DNA replication
C07H6.1	GO:0006281	biological_process	DNA repair
C07H6.1	GO:0006310	biological_process	DNA recombination
C07H6.1	GO:0007126	biological_process	meiosis
C07H6.1	GO:0009790	biological_process	embryonic development
C07H6.1	GO:0009792	biological_process	embryonic development ending in birth or egg hatching
C07H6.2	GO:0009790	biological_process	embryonic development
C07H6.2	GO:0040010	biological_process	positive regulation of growth rate
C07H6.3	GO:0000003	biological_process	reproduction
C07H6.3	GO:0007067	biological_process	mitosis
C07H6.3	GO:0009790	biological_process	embryonic development
C07H6.3	GO:0009792	biological_process	embryonic development ending in birth or egg hatching
C07H6.3	GO:0040018	biological_process	positive regulation of multicellular organism growth
C07H6.4	GO:0006396	biological_process	RNA processing
C07H6.4	GO:0009790	biological_process	embryonic development
C07H6.5	GO:0000003	biological_process	reproduction
C07H6.5	GO:0002009	biological_process	morphogenesis of an epithelium
C07H6.5	GO:0002119	biological_process	nematode larval development
C07H6.5	GO:0006898	biological_process	receptor-mediated endocytosis
C07H6.5	GO:0006915	biological_process	apoptosis
C07H6.5	GO:0006916	biological_process	anti-apoptosis
C07H6.5	GO:0007276	biological_process	gamete generation
C07H6.5	GO:0008219	biological_process	cell death
C07H6.5	GO:0008340	biological_process	determination of adult life span
C07H6.5	GO:0009792	biological_process	embryonic development ending in birth or egg hatching
C07H6.5	GO:0016071	biological_process	mRNA metabolic process
C07H6.5	GO:0040007	biological_process	growth
C07H6.5	GO:0040010	biological_process	positive regulation of growth rate
C07H6.5	GO:0040035	biological_process	hermaphrodite genitalia development
C07H6.5	GO:0051729	biological_process	germline cell cycle switching, mitotic to meiotic cell cycle
C07H6.6	GO:0000003	biological_process	reproduction
C07H6.6	GO:0000077	biological_process	DNA damage checkpoint
C07H6.6	GO:0000723	biological_process	telomere maintenance
C07H6.6	GO:0006280	biological_process	mutagenesis
C07H6.6	GO:0008340	biological_process	determination of adult life span
C07H6.6	GO:0009411	biological_process	response to UV
C07H6.6	GO:0009790	biological_process	embryonic development
C07H6.6	GO:0009792	biological_process	embryonic development ending in birth or egg hatching
C07H6.6	GO:0010165	biological_process	response to X-ray
C07H6.7	GO:0006355	biological_process	regulation of transcription, DNA-dependent
C07H6.7	GO:0007265	biological_process	Ras protein signal transduction
C07H6.7	GO:0007411	biological_process	axon guidance
C07H6.7	GO:0009790	biological_process	embryonic development
C07H6.7	GO:0009952	biological_process	anterior/posterior pattern formation
C07H6.7	GO:0016477	biological_process	cell migration
C07H6.7	GO:0018991	biological_process	oviposition
C07H6.7	GO:0034607	biological_process	turning behavior involved in mating
C07H6.7	GO:0040010	biological_process	positive regulation of growth rate
C07H6.7	GO:0040011	biological_process	locomotion
C07H6.7	GO:0040025	biological_process	vulval development
C07H6.7	GO:0040026	biological_process	positive regulation of vulval development
C07H6.7	GO:0040027	biological_process	negative regulation of vulval development
C07H6.7	GO:0042659	biological_process	regulation of cell fate specification
C07H6.7	GO:0045026	biological_process	plasma membrane fusion
C07H6.7	GO:0045449	biological_process	regulation of transcription
C07H6.7	GO:0051302	biological_process	regulation of cell division
C07H6.8	GO:0040010	biological_process	positive regulation of growth rate
C08A9.1	GO:0002119	biological_process	nematode larval development
C08A9.1	GO:0006801	biological_process	superoxide metabolic process
C08A9.1	GO:0008340	biological_process	determination of adult life span
C08A9.1	GO:0040007	biological_process	growth
C08A9.1	GO:0048675	biological_process	axon extension
C08A9.1	GO:0055114	biological_process	oxidation reduction
C08B11.1	GO:0000910	biological_process	cytokinesis
C08B11.1	GO:0007126	biological_process	meiosis
C08B11.1	GO:0007138	biological_process	meiotic anaphase II
C08B11.1	GO:0008054	biological_process	cyclin catabolic process
C08B11.1	GO:0008595	biological_process	determination of anterior/posterior axis, embryo
C08B11.1	GO:0009790	biological_process	embryonic development
C08B11.1	GO:0009792	biological_process	embryonic development ending in birth or egg hatching
C08B11.1	GO:0040035	biological_process	hermaphrodite genitalia development
C08B11.1	GO:0051301	biological_process	cell division
C08B11.1	GO:0051759	biological_process	sister chromosome movement towards spindle pole during meiosis II
C08B11.3	GO:0002119	biological_process	nematode larval development
C08B11.3	GO:0006898	biological_process	receptor-mediated endocytosis
C08B11.3	GO:0009792	biological_process	embryonic development ending in birth or egg hatching
C08B11.3	GO:0010171	biological_process	body morphogenesis
C08B11.3	GO:0040007	biological_process	growth
C08B11.3	GO:0040035	biological_process	hermaphrodite genitalia development
C08B11.5	GO:0000003	biological_process	reproduction
C08B11.5	GO:0009792	biological_process	embryonic development ending in birth or egg hatching
C08B11.5	GO:0040011	biological_process	locomotion
C08B11.5	GO:0040035	biological_process	hermaphrodite genitalia development
C08B11.6	GO:0007126	biological_process	meiosis
C08B11.6	GO:0009792	biological_process	embryonic development ending in birth or egg hatching
C08B11.6	GO:0010171	biological_process	body morphogenesis
C08B11.6	GO:0045132	biological_process	meiotic chromosome segregation
C08B11.7	GO:0002119	biological_process	nematode larval development
C08B11.7	GO:0006511	biological_process	ubiquitin-dependent protein catabolic process
C08B11.7	GO:0008340	biological_process	determination of adult life span
C08B11.7	GO:0009792	biological_process	embryonic development ending in birth or egg hatching
C08B11.7	GO:0040007	biological_process	growth
C08B6.1	GO:0005975	biological_process	carbohydrate metabolic process
C08B6.1	GO:0008152	biological_process	metabolic process
C08B6.1	GO:0030259	biological_process	lipid glycosylation
C08B6.9	GO:0002119	biological_process	nematode larval development
C08B6.9	GO:0008152	biological_process	metabolic process
C08B6.9	GO:0009792	biological_process	embryonic development ending in birth or egg hatching
C08B6.9	GO:0016925	biological_process	protein sumoylation
C08B6.9	GO:0040007	biological_process	growth
C08B6.9	GO:0040019	biological_process	positive regulation of embryonic development
C08B6.9	GO:0048477	biological_process	oogenesis
C08C3.3	GO:0000122	biological_process	negative regulation of transcription from RNA polymerase II promoter
C08C3.3	GO:0006355	biological_process	regulation of transcription, DNA-dependent
C08C3.3	GO:0009790	biological_process	embryonic development
C08C3.3	GO:0009952	biological_process	anterior/posterior pattern formation
C08C3.3	GO:0030334	biological_process	regulation of cell migration
C08C3.3	GO:0042659	biological_process	regulation of cell fate specification
C08C3.3	GO:0045138	biological_process	tail tip morphogenesis
C08C3.3	GO:0045449	biological_process	regulation of transcription
C08C3.3	GO:0050679	biological_process	positive regulation of epithelial cell proliferation
C08C3.3	GO:0051179	biological_process	localization
C08D8.1	GO:0055085	biological_process	transmembrane transport
C08E8.2	GO:0009058	biological_process	biosynthetic process
C08F11.8	GO:0005975	biological_process	carbohydrate metabolic process
C08F11.8	GO:0008152	biological_process	metabolic process
C08F11.8	GO:0030259	biological_process	lipid glycosylation
C08F8.1	GO:0000003	biological_process	reproduction
C08F8.1	GO:0006457	biological_process	protein folding
C08F8.1	GO:0007020	biological_process	microtubule nucleation
C08F8.1	GO:0009792	biological_process	embryonic development ending in birth or egg hatching
C08F8.1	GO:0010171	biological_process	body morphogenesis
C08F8.1	GO:0040010	biological_process	positive regulation of growth rate
C08F8.1	GO:0040011	biological_process	locomotion
C08F8.1	GO:0040018	biological_process	positive regulation of multicellular organism growth
C08F8.1	GO:0040035	biological_process	hermaphrodite genitalia development
C08F8.2	GO:0000003	biological_process	reproduction
C08F8.2	GO:0002119	biological_process	nematode larval development
C08F8.2	GO:0006898	biological_process	receptor-mediated endocytosis
C08F8.2	GO:0009792	biological_process	embryonic development ending in birth or egg hatching
C08F8.2	GO:0040007	biological_process	growth
C08F8.2	GO:0040010	biological_process	positive regulation of growth rate
C08F8.6	GO:0006468	biological_process	protein amino acid phosphorylation
C08F8.7	GO:0006886	biological_process	intracellular protein transport
C08F8.7	GO:0006913	biological_process	nucleocytoplasmic transport
C08F8.7	GO:0007165	biological_process	signal transduction
C08F8.7	GO:0007264	biological_process	small GTPase mediated signal transduction
C08F8.7	GO:0015031	biological_process	protein transport
C08F8.7	GO:0015684	biological_process	ferrous iron transport
C08F8.8	GO:0000003	biological_process	reproduction
C08F8.8	GO:0006355	biological_process	regulation of transcription, DNA-dependent
C08F8.8	GO:0008340	biological_process	determination of adult life span
C08F8.8	GO:0016477	biological_process	cell migration
C08F8.8	GO:0035262	biological_process	gonad morphogenesis
C08F8.8	GO:0040010	biological_process	positive regulation of growth rate
C08F8.8	GO:0040011	biological_process	locomotion
C08F8.8	GO:0040018	biological_process	positive regulation of multicellular organism growth
C08F8.8	GO:0040035	biological_process	hermaphrodite genitalia development
C08F8.8	GO:0045944	biological_process	positive regulation of transcription from RNA polymerase II promoter
C08G5.4	GO:0006810	biological_process	transport
C08H9.1	GO:0006508	biological_process	proteolysis
C08H9.2	GO:0000003	biological_process	reproduction
C08H9.2	GO:0002119	biological_process	nematode larval development
C08H9.2	GO:0009792	biological_process	embryonic development ending in birth or egg hatching
C08H9.2	GO:0010171	biological_process	body morphogenesis
C08H9.2	GO:0018991	biological_process	oviposition
C08H9.2	GO:0040007	biological_process	growth
C08H9.2	GO:0040010	biological_process	positive regulation of growth rate
C08H9.2	GO:0040011	biological_process	locomotion
C08H9.2	GO:0040017	biological_process	positive regulation of locomotion
C08H9.2	GO:0040035	biological_process	hermaphrodite genitalia development
C08H9.3	GO:0000003	biological_process	reproduction
C08H9.3	GO:0002119	biological_process	nematode larval development
C08H9.3	GO:0006281	biological_process	DNA repair
C08H9.3	GO:0009792	biological_process	embryonic development ending in birth or egg hatching
C08H9.3	GO:0040007	biological_process	growth
C08H9.3	GO:0040035	biological_process	hermaphrodite genitalia development
C08H9.5	GO:0006468	biological_process	protein amino acid phosphorylation
C08H9.5	GO:0008340	biological_process	determination of adult life span
C08H9.5	GO:0040010	biological_process	positive regulation of growth rate
C09B7.1	GO:0007186	biological_process	G-protein coupled receptor protein signaling pathway
C09B8.1	GO:0007173	biological_process	epidermal growth factor receptor signaling pathway
C09B8.1	GO:0030728	biological_process	ovulation
C09B8.1	GO:0040010	biological_process	positive regulation of growth rate
C09B8.1	GO:0046856	biological_process	phosphoinositide dephosphorylation
C09B8.1	GO:0048016	biological_process	inositol phosphate-mediated signaling
C09B8.6	GO:0009408	biological_process	response to heat
C09B8.7	GO:0006468	biological_process	protein amino acid phosphorylation
C09B8.7	GO:0007411	biological_process	axon guidance
C09D1.1	GO:0005975	biological_process	carbohydrate metabolic process
C09D1.1	GO:0006468	biological_process	protein amino acid phosphorylation
C09D1.1	GO:0030241	biological_process	muscle thick filament assembly
C09D1.1	GO:0031034	biological_process	myosin filament assembly
C09D1.1	GO:0035023	biological_process	regulation of Rho protein signal transduction
C09D1.1	GO:0040011	biological_process	locomotion
C09D1.1	GO:0048010	biological_process	vascular endothelial growth factor receptor signaling pathway
C09D4.1	GO:0007413	biological_process	axonal fasciculation
C09D4.1	GO:0040011	biological_process	locomotion
C09D4.1	GO:0055085	biological_process	transmembrane transport
C09D4.5	GO:0000003	biological_process	reproduction
C09D4.5	GO:0002119	biological_process	nematode larval development
C09D4.5	GO:0006412	biological_process	translation
C09D4.5	GO:0008340	biological_process	determination of adult life span
C09D4.5	GO:0009792	biological_process	embryonic development ending in birth or egg hatching
C09D4.5	GO:0009795	biological_process	embryonic development
C09D4.5	GO:0040007	biological_process	growth
C09D8.1	GO:0000003	biological_process	reproduction
C09D8.1	GO:0006470	biological_process	protein amino acid dephosphorylation
C09D8.1	GO:0007369	biological_process	gastrulation
C09D8.1	GO:0007416	biological_process	synaptogenesis
C09D8.1	GO:0008544	biological_process	epidermis development
C09D8.1	GO:0009792	biological_process	embryonic development ending in birth or egg hatching
C09D8.1	GO:0010171	biological_process	body morphogenesis
C09D8.1	GO:0016311	biological_process	dephosphorylation
C09D8.1	GO:0040010	biological_process	positive regulation of growth rate
C09E10.2	GO:0007165	biological_process	signal transduction
C09E10.2	GO:0007205	biological_process	activation of protein kinase C activity by G-protein coupled receptor protein signaling pathway
C09E10.2	GO:0007210	biological_process	serotonin receptor signaling pathway
C09E10.2	GO:0007212	biological_process	dopamine receptor signaling pathway
C09E10.2	GO:0007242	biological_process	intracellular signaling cascade
C09E10.2	GO:0007271	biological_process	synaptic transmission, cholinergic
C09E10.2	GO:0032094	biological_process	response to food
C09E10.2	GO:0040012	biological_process	regulation of locomotion
C09E10.2	GO:0040013	biological_process	negative regulation of locomotion
C09E10.2	GO:0046662	biological_process	regulation of oviposition
C09E7.5	GO:0009790	biological_process	embryonic development
C09E7.7	GO:0009790	biological_process	embryonic development
C09E7.8	GO:0009790	biological_process	embryonic development
C09E7.9	GO:0009790	biological_process	embryonic development
C09F5.2	GO:0000003	biological_process	reproduction
C09F5.2	GO:0009790	biological_process	embryonic development
C09F5.3	GO:0009790	biological_process	embryonic development
C09F9.3	GO:0006541	biological_process	glutamine metabolic process
C09G12.1	GO:0006355	biological_process	regulation of transcription, DNA-dependent
C09G12.1	GO:0045449	biological_process	regulation of transcription
C09G12.8	GO:0001764	biological_process	neuron migration
C09G12.8	GO:0002009	biological_process	morphogenesis of an epithelium
C09G12.8	GO:0002119	biological_process	nematode larval development
C09G12.8	GO:0006886	biological_process	intracellular protein transport
C09G12.8	GO:0006913	biological_process	nucleocytoplasmic transport
C09G12.8	GO:0007165	biological_process	signal transduction
C09G12.8	GO:0007264	biological_process	small GTPase mediated signal transduction
C09G12.8	GO:0007411	biological_process	axon guidance
C09G12.8	GO:0008045	biological_process	motor axon guidance
C09G12.8	GO:0010171	biological_process	body morphogenesis
C09G12.8	GO:0015031	biological_process	protein transport
C09G12.8	GO:0016477	biological_process	cell migration
C09G12.8	GO:0031103	biological_process	axon regeneration
C09G12.8	GO:0033563	biological_process	dorsal/ventral axon guidance
C09G12.8	GO:0040007	biological_process	growth
C09G12.8	GO:0040026	biological_process	positive regulation of vulval development
C09G12.8	GO:0040035	biological_process	hermaphrodite genitalia development
C09G12.8	GO:0040039	biological_process	inductive cell migration
C09G12.8	GO:0043652	biological_process	engulfment of apoptotic cell
C09G12.8	GO:0048812	biological_process	neuron projection morphogenesis
C09G12.8	GO:0048846	biological_process	axon extension involved in axon guidance
C09G12.9	GO:0002119	biological_process	nematode larval development
C09G12.9	GO:0006464	biological_process	protein modification process
C09G12.9	GO:0006898	biological_process	receptor-mediated endocytosis
C09G12.9	GO:0009792	biological_process	embryonic development ending in birth or egg hatching
C09G12.9	GO:0015031	biological_process	protein transport
C09G12.9	GO:0030163	biological_process	protein catabolic process
C09G4.1	GO:0007568	biological_process	aging
C09G4.1	GO:0010467	biological_process	gene expression
C09G4.1	GO:0046513	biological_process	ceramide biosynthetic process
C09G4.2	GO:0000003	biological_process	reproduction
C09G4.2	GO:0006468	biological_process	protein amino acid phosphorylation
C09G4.3	GO:0007049	biological_process	cell cycle
C09G4.3	GO:0007067	biological_process	mitosis
C09G4.3	GO:0007126	biological_process	meiosis
C09G4.3	GO:0009792	biological_process	embryonic development ending in birth or egg hatching
C09G4.5	GO:0000003	biological_process	reproduction
C09G4.5	GO:0002119	biological_process	nematode larval development
C09G4.5	GO:0009792	biological_process	embryonic development ending in birth or egg hatching
C09G5.1	GO:0006810	biological_process	transport
C09G5.1	GO:0006811	biological_process	ion transport
C09G5.1	GO:0042330	biological_process	taxis
C09G5.2	GO:0040002	biological_process	collagen and cuticulin-based cuticle development
C09G5.3	GO:0040002	biological_process	collagen and cuticulin-based cuticle development
C09G5.4	GO:0040002	biological_process	collagen and cuticulin-based cuticle development
C09G5.5	GO:0040002	biological_process	collagen and cuticulin-based cuticle development
C09G5.6	GO:0000003	biological_process	reproduction
C09G5.6	GO:0002119	biological_process	nematode larval development
C09G5.6	GO:0009792	biological_process	embryonic development ending in birth or egg hatching
C09G5.6	GO:0018996	biological_process	molting cycle, collagen and cuticulin-based cuticle
C09G5.6	GO:0030436	biological_process	asexual sporulation
C09G5.6	GO:0040002	biological_process	collagen and cuticulin-based cuticle development
C09G5.6	GO:0040011	biological_process	locomotion
C09G5.8	GO:0019915	biological_process	lipid storage
C09G9.6	GO:0000003	biological_process	reproduction
C09G9.6	GO:0030163	biological_process	protein catabolic process
C09G9.6	GO:0048599	biological_process	oocyte development
C09H10.2	GO:0000003	biological_process	reproduction
C09H10.2	GO:0002119	biological_process	nematode larval development
C09H10.2	GO:0006412	biological_process	translation
C09H10.2	GO:0009792	biological_process	embryonic development ending in birth or egg hatching
C09H10.2	GO:0018996	biological_process	molting cycle, collagen and cuticulin-based cuticle
C09H10.2	GO:0040007	biological_process	growth
C09H10.2	GO:0040018	biological_process	positive regulation of multicellular organism growth
C09H10.2	GO:0040035	biological_process	hermaphrodite genitalia development
C09H10.3	GO:0000003	biological_process	reproduction
C09H10.3	GO:0002119	biological_process	nematode larval development
C09H10.3	GO:0006120	biological_process	mitochondrial electron transport, NADH to ubiquinone
C09H10.3	GO:0008340	biological_process	determination of adult life span
C09H10.3	GO:0008406	biological_process	gonad development
C09H10.3	GO:0009792	biological_process	embryonic development ending in birth or egg hatching
C09H10.3	GO:0019915	biological_process	lipid storage
C09H10.3	GO:0030421	biological_process	defecation
C09H10.3	GO:0033108	biological_process	mitochondrial respiratory chain complex assembly
C09H10.3	GO:0040007	biological_process	growth
C09H10.3	GO:0040010	biological_process	positive regulation of growth rate
C09H10.3	GO:0040018	biological_process	positive regulation of multicellular organism growth
C09H10.3	GO:0040039	biological_process	inductive cell migration
C09H10.3	GO:0042493	biological_process	response to drug
C09H10.3	GO:0043050	biological_process	pharyngeal pumping
C09H10.3	GO:0043054	biological_process	dauer exit
C09H10.3	GO:0045333	biological_process	cellular respiration
C09H10.3	GO:0048598	biological_process	embryonic morphogenesis
C09H10.3	GO:0055114	biological_process	oxidation reduction
C09H10.6	GO:0018991	biological_process	oviposition
C09H5.2	GO:0006754	biological_process	ATP biosynthetic process
C09H5.2	GO:0006812	biological_process	cation transport
C09H5.2	GO:0008152	biological_process	metabolic process
C09H5.2	GO:0018991	biological_process	oviposition
C09H6.2	GO:0007270	biological_process	nerve-nerve synaptic transmission
C09H6.2	GO:0008105	biological_process	asymmetric protein localization
C09H6.2	GO:0040026	biological_process	positive regulation of vulval development
C09H6.2	GO:0043113	biological_process	receptor clustering
C09H6.2	GO:0050975	biological_process	sensory perception of touch
C09H6.3	GO:0000003	biological_process	reproduction
C09H6.3	GO:0009792	biological_process	embryonic development ending in birth or egg hatching
C09H6.3	GO:0018991	biological_process	oviposition
C09H6.3	GO:0033563	biological_process	dorsal/ventral axon guidance
C09H6.3	GO:0033564	biological_process	anterior/posterior axon guidance
C10C5.3	GO:0006508	biological_process	proteolysis
C10C5.3	GO:0006520	biological_process	cellular amino acid metabolic process
C10C5.3	GO:0008152	biological_process	metabolic process
C10C5.4	GO:0006508	biological_process	proteolysis
C10C5.4	GO:0006520	biological_process	cellular amino acid metabolic process
C10C5.4	GO:0008152	biological_process	metabolic process
C10C5.5	GO:0006508	biological_process	proteolysis
C10C5.5	GO:0006520	biological_process	cellular amino acid metabolic process
C10C5.5	GO:0008152	biological_process	metabolic process
C10C5.6	GO:0008340	biological_process	determination of adult life span
C10C5.6	GO:0008406	biological_process	gonad development
C10C5.6	GO:0040024	biological_process	dauer larval development
C10C6.1	GO:0000003	biological_process	reproduction
C10C6.1	GO:0006468	biological_process	protein amino acid phosphorylation
C10C6.1	GO:0009792	biological_process	embryonic development ending in birth or egg hatching
C10C6.2	GO:0007186	biological_process	G-protein coupled receptor protein signaling pathway
C10C6.2	GO:0040011	biological_process	locomotion
C10C6.2	GO:0040017	biological_process	positive regulation of locomotion
C10C6.2	GO:0040035	biological_process	hermaphrodite genitalia development
C10C6.5	GO:0010171	biological_process	body morphogenesis
[truncated: 22,436 more rows]
