# Supplementary material for: OrthoList: A Compendium of C. elegans Genes with Human Orthologs
Source: PLoS One. 2011 May 25;6(5):e20085. doi: 10.1371/journal.pone.0020085 (PMC3102077; doi:10.1371/journal.pone.0020085)
Supplement: Table S12 — Cellular component (cc) GO annotations of OrthoList. A) Gene-focused pivot report. B) cc-focused pivot report. C) All OrthoList genes with cc GO annotations (4,313/7,633, or ∼56%), and their associated annotations. This is source data for pivot reports in Tables S12A, B. (XLS) [file pone.0020085.s012.xls]

## Sheet: A) gene-focused cc report
Count of GO Term
Gene ID	GO Term	Total
2RSSE.1	intracellular	1
4R79.2	cytoplasm	1
	intracellular	1
	nucleus	1
AC3.5	integral to membrane	1
AC3.6	integral to membrane	1
AC3.7	integral to membrane	1
AC3.8	integral to membrane	1
AH6.2	integral to membrane	1
	membrane	1
B0024.1	integral to membrane	1
B0024.13	integral to membrane	1
B0024.14	extracellular region	1
	integral to membrane	1
B0024.15	integral to membrane	1
	membrane	1
B0024.2	integral to membrane	1
B0025.1	cytoplasm	1
	nuclear outer membrane	1
	phosphoinositide 3-kinase complex	1
B0034.3	cell soma membrane	1
	extracellular space	1
	integral to membrane	1
	intracellular membrane-bounded organelle	1
	membrane	1
B0035.1	intracellular	1
B0035.10	nucleosome	1
B0035.12	intracellular	1
B0035.16	cytoplasm	1
B0035.2	integral to membrane	1
B0035.4	prefoldin complex	1
B0035.7	intracellular	1
	nucleosome	1
	nucleus	1
B0035.8	intracellular	1
	nucleosome	1
	nucleus	1
B0035.9	intracellular	1
	nucleosome	1
	nucleus	1
B0041.4	intracellular	1
	ribosome	1
B0041.5	integral to membrane	1
B0205.11	intracellular	1
	ribosome	1
B0205.4	Golgi apparatus	1
	integral to membrane	1
	membrane	1
B0207.12	integral to membrane	1
	membrane	1
	postsynaptic membrane	1
B0207.4	condensed chromosome	1
	condensed nuclear chromosome	1
	spindle	1
	spindle midzone	1
B0212.1	integral to membrane	1
B0212.5	cell soma	1
	integral to membrane	1
	membrane	1
	nonmotile primary cilium	1
B0213.11	integral to membrane	1
B0213.12	integral to membrane	1
B0213.14	integral to membrane	1
B0213.15	integral to membrane	1
B0218.1	integral to membrane	1
B0218.2	integral to membrane	1
B0222.2	integral to membrane	1
	membrane	1
B0222.3	integral to membrane	1
	membrane	1
B0222.6	integral to membrane	1
B0222.7	integral to membrane	1
B0222.8	integral to membrane	1
B0228.5	cell soma	1
	cytoplasm	1
	nucleus	1
B0240.1	integral to membrane	1
	membrane	1
B0240.2	integral to membrane	1
B0240.4	integral to membrane	1
B0244.2	dense core granule	1
	integral to membrane	1
	synapse	1
	trans-Golgi network transport vesicle	1
B0250.1	intracellular	1
	ribosome	1
B0250.9	integral to membrane	1
B0252.2	extracellular region	1
B0261.2	cytoplasm	1
B0261.4	mitochondrial ribosome	1
B0272.1	microtubule	1
	protein complex	1
B0272.2	integral to membrane	1
B0273.4	integral to membrane	1
	integral to plasma membrane	1
B0280.12	integral to membrane	1
	membrane	1
	outer membrane-bounded periplasmic space	1
B0281.3	intracellular	1
B0281.5	membrane	1
	voltage-gated potassium channel complex	1
B0281.6	membrane	1
	voltage-gated potassium channel complex	1
B0281.8	intracellular	1
B0285.5	integral to membrane	1
B0285.6	integral to membrane	1
	membrane	1
B0286.2	integral to membrane	1
	membrane	1
B0286.4	nucleus	1
B0286.5	nucleus	1
B0303.11	integral to membrane	1
	membrane	1
B0303.15	ribosome	1
B0303.4	integral to membrane	1
B0304.1	nucleus	1
B0304.3	integral to membrane	1
B0331.1	integral to membrane	1
B0331.2	integral to membrane	1
	membrane	1
B0334.5	integral to membrane	1
B0334.6	integral to membrane	1
B0334.8	phosphoinositide 3-kinase complex	1
B0336.10	intracellular	1
	ribosome	1
B0336.11	integral to membrane	1
B0336.13	transcription factor TFIIA complex	1
B0336.2	cytoplasm	1
	intracellular	1
	nucleus	1
B0336.6	axon	1
	cell soma	1
	cytoplasm	1
	dendrite	1
B0336.8	cytoplasm	1
B0348.4	integral to membrane	1
B0348.6	cytoplasm	1
B0350.2	lateral plasma membrane	1
B0361.10	integral to membrane	1
B0361.7	integral to membrane	1
B0361.8	integral to membrane	1
B0365.1	cytoplasm	1
B0365.3	integral to membrane	1
	membrane	1
	plasma membrane	1
B0393.1	intracellular	1
	ribosome	1
	small ribosomal subunit	1
B0393.2	intracellular	1
B0393.5	integral to membrane	1
B0395.1	integral to membrane	1
B0395.2	integral to membrane	1
B0399.1	integral to membrane	1
B0410.2	integral to membrane	1
B0412.1	nucleus	1
B0412.4	intracellular	1
	ribosome	1
B0414.2	nucleus	1
B0414.3	nucleosome	1
	nucleus	1
B0414.6	P granule	1
B0416.1	integral to membrane	1
B0416.5	integral to membrane	1
B0416.6	Golgi membrane	1
	integral to membrane	1
B0432.4	membrane	1
B0432.5	axon	1
B0454.6	integral to membrane	1
	membrane	1
B0457.1	integral to membrane	1
	integral to plasma membrane	1
	membrane	1
B0464.1	cytoplasm	1
B0464.6	integral to membrane	1
B0464.7	condensed chromosome	1
	condensed chromosome, centromeric region	1
	cytoplasm	1
	nuclear envelope	1
	nucleoplasm	1
B0478.1	axon	1
	cell soma	1
	cytoplasm	1
	membrane	1
	nucleus	1
B0491.1	endoplasmic reticulum membrane	1
	integral to membrane	1
B0491.2	integral to membrane	1
B0491.8	integral to membrane	1
	membrane	1
B0495.4	apical plasma membrane	1
	integral to membrane	1
B0495.7	integral to membrane	1
B0496.3	membrane	1
B0511.12	integral to membrane	1
B0511.13	integral to membrane	1
B0513.3	intracellular	1
	ribosome	1
B0513.9	integral to membrane	1
B0523.5	nucleus	1
B0545.3	extracellular region	1
B0547.1	A band	1
	cytoplasm	1
	nucleus	1
	signalosome	1
B0554.5	integral to membrane	1
B0554.7	integral to membrane	1
B0563.2	integral to membrane	1
B0563.4	integral to membrane	1
B0564.10	nucleus	1
B0564.3	integral to membrane	1
B0564.4	integral to membrane	1
BE0003N10.1	mitochondrion	1
BE0003N10.2	intracellular	1
BE0003N10.3	integral to membrane	1
BE10.2	endoplasmic reticulum	1
	integral to membrane	1
C01A2.3	integral to membrane	1
C01B10.9	integral to membrane	1
C01B12.1	integral to membrane	1
C01B12.2	nucleus	1
C01B12.3	integral to membrane	1
C01B12.4	integral to membrane	1
C01B12.5	integral to membrane	1
C01B4.9	integral to membrane	1
C01B7.6	axon	1
	intracellular	1
	neuromuscular junction	1
	synapse	1
C01C10.3	integral to membrane	1
C01F1.2	integral to membrane	1
C01F4.2	intracellular	1
C01F6.9	intracellular	1
C01G10.11	axon	1
	cell soma	1
C01G10.7	citrate lyase complex	1
C01G10.8	cytoplasm	1
C01G12.8	integral to membrane	1
	membrane	1
C01G6.1	integral to membrane	1
	membrane	1
C01G6.8	axon	1
	cell projection	1
	cell soma membrane	1
	dendrite	1
	integral to membrane	1
	integral to plasma membrane	1
	neuromuscular junction	1
	neuron projection	1
	plasma membrane	1
C01G8.2	integral to membrane	1
	membrane	1
C01G8.4	integral to membrane	1
C01G8.5	cell cortex	1
	cytoplasm	1
	extrinsic to membrane	1
	filamentous actin	1
	membrane-enclosed lumen	1
C01G8.9	intracellular	1
C01H6.1	integral to membrane	1
C01H6.5	nucleus	1
C01H6.6	integral to membrane	1
C02B8.4	nucleus	1
C02C2.5	integral to membrane	1
C02C6.1	cleavage furrow	1
	cytoplasmic vesicle	1
	midbody	1
	phagocytic cup	1
	phagocytic vesicle	1
	pseudopodium	1
	spindle microtubule	1
	synapse	1
C02C6.3	integral to membrane	1
C02D4.2	integral to membrane	1
	integral to plasma membrane	1
C02D5.2	integral to membrane	1
C02D5.3	cytoplasm	1
C02E11.1	integral to membrane	1
C02E7.1	integral to membrane	1
	membrane	1
C02F12.4	intracellular	1
C02F4.1	plasma membrane	1
C02F4.2	axon	1
	cell soma	1
	cilium	1
	cytoplasm	1
	dendrite	1
	nucleus	1
C02F5.13	integral to membrane	1
C02F5.3	integral to membrane	1
	intracellular	1
C02F5.9	proteasome core complex	1
C02H6.1	integral to membrane	1
	membrane	1
C02H7.1	cilium axoneme	1
	intraflagellar transport particle B	1
	microtubule basal body	1
C02H7.3	cell	1
C03A3.2	integral to membrane	1
C03B8.4	intracellular	1
C03C10.3	integral to membrane	1
C03D6.3	intracellular	1
	nucleus	1
C03D6.5	nucleus	1
C03D6.8	intracellular	1
	ribosome	1
C03E10.4	Golgi stack	1
	integral to membrane	1
C03F11.1	integral to membrane	1
C03F11.3	integral to membrane	1
	membrane	1
C03H12.1	integral to membrane	1
C03H5.2	Golgi membrane	1
	integral to membrane	1
	membrane	1
C04A11.4	extracellular matrix	1
	integral to membrane	1
C04A2.1	intracellular	1
C04A2.3	nucleus	1
	NuRD complex	1
C04A2.7	integral to membrane	1
C04C3.2	integral to membrane	1
	membrane	1
	postsynaptic membrane	1
C04D8.1	cell junction	1
	intracellular	1
C04F1.3	nucleus	1
C04F12.10	integral to membrane	1
	membrane	1
C04F12.4	intracellular	1
	ribosome	1
C04F5.1	integral to membrane	1
	integral to plasma membrane	1
	plasma membrane	1
C04F6.3	extracellular region	1
C04F6.4	actomyosin, actin part	1
	sarcoplasm	1
C04G2.6	nucleus	1
C04G2.7	nucleus	1
C04G6.10	extracellular region	1
C04G6.7	extracellular region	1
C04H5.6	intracellular	1
C05A9.1	integral to membrane	1
C05B10.1	plasma membrane	1
C05C10.3	mitochondrion	1
C05C12.3	integral to membrane	1
	membrane	1
C05C8.5	intracellular	1
C05C8.9	centriole	1
	nonmotile primary cilium	1
C05D10.3	integral to membrane	1
	membrane	1
C05D11.2	cytoplasm	1
C05D11.4	cytoplasm	1
	extracellular region	1
	nuclear speck	1
	nucleolus	1
	nucleus	1
	snRNP U1	1
C05D11.6	integral to membrane	1
C05D11.7	integral to membrane	1
C05D12.1	integral to membrane	1
C05D2.1	integral to membrane	1
	membrane	1
C05D9.2	integral to membrane	1
	membrane	1
C05D9.3	integrin complex	1
C05D9.5	cytoplasm	1
C05E11.1	cell soma	1
	integral to membrane	1
	membrane fraction	1
	neuron projection	1
	synaptic vesicle	1
C05G5.1	integral to membrane	1
C05H8.1	cytoplasm	1
	nucleus	1
C06A1.5	RNA polymerase complex	1
C06A5.7	cytoskeleton	1
C06A6.4	cytoplasm	1
C06A8.6	extracellular region	1
C06A8.9	integral to membrane	1
	membrane	1
	outer membrane-bounded periplasmic space	1
C06B3.4	integral to membrane	1
C06B3.5	integral to membrane	1
C06B8.8	intracellular	1
	ribosome	1
C06C3.1	cell-cell adherens junction	1
	cytoplasm	1
	plasma membrane light-harvesting complex	1
C06E1.3	endoplasmic reticulum membrane	1
	integral to membrane	1
C06E1.4	cell soma	1
	dendrite	1
	integral to membrane	1
	ionotropic glutamate receptor complex	1
	membrane	1
	neuron projection	1
	outer membrane-bounded periplasmic space	1
	postsynaptic membrane	1
C06E7.1	integral to membrane	1
C06G3.10	membrane	1
C06G3.2	cell cortex	1
	microtubule	1
	spindle pole	1
C06G3.7	cytoplasm	1
C06G4.2	integral to membrane	1
	intracellular	1
C06G4.5	integral to membrane	1
C06G8.1	integral to membrane	1
	membrane	1
C06G8.2	integral to membrane	1
	membrane	1
C06G8.3	integral to membrane	1
	membrane	1
C06H2.4	integral to membrane	1
	membrane	1
C07A12.3	nucleus	1
C07A12.4	endoplasmic reticulum	1
C07A12.7	intracellular	1
C07A4.1	integral to membrane	1
C07A4.3	extracellular region	1
C07A9.11	integral to membrane	1
C07A9.2	nucleus	1
C07A9.3	nuclear chromatin	1
	nucleus	1
C07A9.4	integral to membrane	1
C07A9.8	integral to membrane	1
C07B5.5	intracellular	1
	nucleus	1
C07E3.1	intracellular	1
C07F11.1	axon	1
	cell	1
	integral to membrane	1
	intrinsic to membrane	1
C07G1.4	cell cortex	1
	cell leading edge	1
	cortical actin cytoskeleton	1
C07G1.5	early endosome	1
	endosome membrane	1
C07G2.2	nucleus	1
C07G2.3	cellular_component	1
C07H4.2	integral to membrane	1
	membrane	1
C07H6.5	cytoplasm	1
	cytoplasmic mRNA processing body	1
	P granule	1
C07H6.6	cytoplasm	1
C07H6.7	nucleus	1
C08A9.1	mitochondrion	1
C08B11.1	cellular_component	1
C08B11.3	intracellular	1
C08B11.7	intracellular	1
C08B11.8	endoplasmic reticulum membrane	1
	integral to membrane	1
C08B6.1	integral to membrane	1
C08B6.8	intracellular	1
C08C3.3	nucleus	1
C08D8.1	integral to membrane	1
C08D8.2	cytoskeleton	1
C08F11.8	integral to membrane	1
C08F8.1	prefoldin complex	1
C08F8.4	integral to membrane	1
C08F8.7	integral to membrane	1
	intracellular	1
C08F8.8	nucleus	1
C08G5.4	integral to membrane	1
	membrane	1
	synaptic vesicle	1
C08H9.3	endoplasmic reticulum membrane	1
	integral to membrane	1
C08H9.5	integral to membrane	1
C09B7.1	integral to membrane	1
	membrane fraction	1
C09B8.7	axon	1
	cell soma	1
	insoluble fraction	1
	plasma membrane	1
	soluble fraction	1
C09B9.3	integral to membrane	1
C09D1.1	A band	1
	integral to plasma membrane	1
	intracellular	1
C09D4.1	integral to membrane	1
C09D4.5	intracellular	1
	ribosome	1
C09D8.1	adherens junction	1
	integral to membrane	1
	synapse	1
C09F5.2	integral to membrane	1
C09F5.3	intracellular	1
C09G12.8	cytoplasmic vesicle	1
	insoluble fraction	1
	internal side of plasma membrane	1
	intracellular	1
	plasma membrane	1
	soluble fraction	1
C09G4.1	endoplasmic reticulum membrane	1
	integral to membrane	1
C09G4.5	nucleosome	1
C09G5.1	integral to membrane	1
	membrane	1
	postsynaptic membrane	1
C09G5.3	integral to membrane	1
C09G5.4	integral to membrane	1
C09G5.5	integral to membrane	1
C09G5.6	endospore-forming forespore	1
	integral to membrane	1
	proteinaceous extracellular matrix	1
C09G9.6	centrosome	1
	cytoplasm	1
	P granule	1
C09H10.2	intracellular	1
	ribosome	1
C09H10.3	mitochondrion	1
C09H5.2	integral to membrane	1
	membrane	1
C09H6.1	intracellular	1
C09H6.2	cell soma	1
	cytoplasm	1
	Golgi trans cisterna	1
	neuron projection	1
	plasma membrane	1
	trans-Golgi network transport vesicle	1
C09H6.3	axon	1
	cytoplasm	1
C10C5.1	integral to membrane	1
C10C5.3	cytoplasm	1
C10C5.4	cytoplasm	1
C10C5.5	cytoplasm	1
C10C6.2	integral to membrane	1
C10C6.5	integral to membrane	1
	membrane	1
C10C6.6	integral to membrane	1
	membrane	1
C10E2.3	cytoplasm	1
	histone deacetylase complex	1
	nucleus	1
C10E2.6	integral to membrane	1
C10F3.2	integral to membrane	1
C10F3.3	integral to membrane	1
	plasma membrane	1
C10F3.5	cytoplasm	1
	cytosol	1
C10F3.6	Golgi cisterna membrane	1
	integral to membrane	1
C10G6.1	intracellular	1
C10G8.5	integral to membrane	1
	membrane	1
C10G8.7	nucleus	1
C10H11.3	integral to membrane	1
C10H11.4	integral to membrane	1
C10H11.5	integral to membrane	1
C10H11.6	integral to membrane	1
C10H11.9	cell-cell adherens junction	1
	contractile fiber	1
	cytoplasm	1
	nucleus	1
C11D2.6	integral to membrane	1
	membrane	1
C11D9.1	intracellular	1
C11H1.2	integral to membrane	1
C11H1.4	peroxisome	1
C12C8.3	cytoplasm	1
	intracellular	1
C12D12.2	cell projection	1
	integral to membrane	1
	membrane	1
	plasma membrane	1
C12D12.5	nucleus	1
C12D8.10	intracellular	1
C12D8.11	ribonucleoprotein complex	1
C12D8.8	integral to membrane	1
C13B4.1	integral to membrane	1
C13B9.4	integral to membrane	1
	membrane	1
C13C4.5	integral to membrane	1
C13D9.7	integral to membrane	1
C13D9.8	integral to membrane	1
C13D9.9	integral to membrane	1
C13F10.5	integral to membrane	1
C13G3.3	protein phosphatase type 2A complex	1
C13G5.1	nucleus	1
C14A11.3	intracellular	1
C14A11.7	intracellular	1
C14A4.2	mitochondrial ribosome	1
	small ribosomal subunit	1
C14A4.3	integral to membrane	1
	intrinsic to endoplasmic reticulum membrane	1
C14A4.4	exosome (RNase complex)	1
	intracellular	1
	nuclear exosome (RNase complex)	1
C14A4.5	exosome (RNase complex)	1
C14B1.1	endoplasmic reticulum	1
C14B9.1	cytoplasm	1
C14B9.2	endoplasmic reticulum	1
	endoplasmic reticulum lumen	1
C14B9.4	centrosome	1
	condensed chromosome	1
	cytoplasm	1
	spindle midzone	1
C14B9.7	intracellular	1
	ribosome	1
C14C10.1	integral to membrane	1
	membrane	1
C14C11.3	integral to membrane	1
C14F5.1	integral to membrane	1
	protein complex	1
C14F5.4	integral to membrane	1
	membrane	1
C14H10.1	integral to membrane	1
	membrane	1
C15A11.1	integral to membrane	1
C15A11.5	integral to membrane	1
C15A11.6	integral to membrane	1
C15A7.2	integral to membrane	1
C15B12.7	integral to membrane	1
	membrane	1
	plasma membrane	1
C15C6.4	nucleolar ribonuclease P complex	1
	ribonuclease MRP complex	1
	ribonuclease P complex	1
C15C7.1	integral to membrane	1
	membrane	1
C15C8.2	nucleus	1
C15F1.3	cytoplasm	1
	integral to membrane	1
	integral to plasma membrane	1
	perinuclear region of cytoplasm	1
	plasma membrane	1
C15F1.4	cytoplasm	1
C15F1.6	integral to membrane	1
C15F1.7	cytosol	1
	mitochondrion	1
C15H11.3	nuclear envelope	1
	nucleoplasm	1
	nucleus	1
C15H11.4	integral to membrane	1
C15H11.7	proteasome core complex	1
	proteasome core complex, alpha-subunit complex	1
C15H11.9	nucleus	1
C15H9.1	integral to membrane	1
C15H9.4	integral to membrane	1
C15H9.5	integral to membrane	1
C15H9.6	endoplasmic reticulum lumen	1
C15H9.7	cytoplasm	1
C15H9.8	integral to peroxisomal membrane	1
C16A3.1	nucleus	1
C16A3.3	intracellular	1
	nucleus	1
C16A3.4	intracellular	1
C16A3.7	nucleus	1
C16A3.9	intracellular	1
	ribosome	1
C16B8.1	integral to membrane	1
C16C10.1	integral to membrane	1
	membrane	1
C16C10.12	integral to membrane	1
	membrane	1
C16C10.2	small-subunit processome	1
C16C10.5	endoplasmic reticulum membrane	1
	Golgi membrane	1
	integral to membrane	1
	sarcoplasmic reticulum membrane	1
C16C10.7	integral to membrane	1
	nucleus	1
C16C2.1	nucleus	1
C16C2.2	cytoplasm	1
	heterotrimeric G-protein complex	1
	neuron projection	1
C16C2.3	intracellular	1
C16D6.2	integral to membrane	1
C16D9.2	integral to membrane	1
C16D9.6	integral to membrane	1
	membrane	1
C17A2.3	integral to membrane	1
	membrane	1
C17C3.1	integral to membrane	1
C17D12.2	nuclear speck	1
C17D12.6	cell surface	1
	cytoplasm	1
	integral to membrane	1
	membrane-bounded organelle	1
	plasma membrane	1
	pseudopodium	1
C17E4.3	integral to membrane	1
C17E4.6	nucleus	1
C17E4.9	integral to membrane	1
	membrane	1
C17F4.8	membrane	1
	voltage-gated potassium channel complex	1
C17G1.3	integral to membrane	1
C17G1.8	integral to membrane	1
C17G10.4	midbody	1
	spindle	1
C17H11.6	integral to membrane	1
C17H12.14	cytoplasm	1
	plasma membrane	1
	proton-transporting two-sector ATPase complex, catalytic domain	1
C17H12.2	integral to membrane	1
C17H12.9	proton-transporting two-sector ATPase complex, catalytic domain	1
C18A3.4	integral to membrane	1
C18A3.6	cytoplasm	1
	intracellular	1
	nucleus	1
	synaptic vesicle	1
C18A3.8	nucleus	1
C18B12.2	integral to membrane	1
	membrane	1
C18B12.3	nucleus	1
C18B12.4	integral to membrane	1
C18B12.6	integral to membrane	1
C18B2.6	integral to membrane	1
	membrane	1
C18C4.10	cytoplasm	1
	kinesin complex	1
	kinesin I complex	1
	nuclear envelope	1
C18C4.2	integral to membrane	1
C18C4.3	cytoplasm	1
	integral to membrane	1
C18D1.4	integral to membrane	1
C18D11.2	apical part of cell	1
	basal part of cell	1
	integral to endosome membrane	1
	integral to Golgi membrane	1
	integral to membrane	1
	integral to membrane of membrane fraction	1
	recycling endosome membrane	1
C18E3.8	integral to membrane	1
C18E9.10	integral to membrane	1
C18E9.11	aster	1
	endoplasmic reticulum	1
	integral to membrane	1
	perinuclear region of cytoplasm	1
	plasma membrane	1
	spindle	1
	spindle pole	1
C18E9.2	integral to membrane	1
C18E9.4	mitochondrion	1
C18E9.6	mitochondrial outer membrane	1
C18F3.2	cell-cell adherens junction	1
	integral to membrane	1
	lateral plasma membrane	1
C18G1.3	integral to membrane	1
C18G1.5	nucleosome	1
	nucleus	1
C18H7.1	integral to membrane	1
C18H7.3	integral to membrane	1
C18H9.7	synapse	1
C18H9.8	cilium	1
C23G10.3	intracellular	1
	ribosome	1
	small ribosomal subunit	1
C23G10.4	proteasome complex	1
C23G10.6	integral to membrane	1
C23H3.3	cytoplasm	1
C23H3.9	integral to membrane	1
C23H4.1	cell	1
	integral to membrane	1
C23H5.7	integral to membrane	1
C24A11.8	integral to membrane	1
C24A3.6	integral to membrane	1
	membrane	1
C24A8.1	integral to membrane	1
C24A8.6	integral to membrane	1
C24B5.2	cytoskeleton	1
	perinuclear region of cytoplasm	1
C24B5.3	integral to membrane	1
	membrane	1
C24B5.4	nucleus	1
C24F3.1	integral to membrane	1
C24F3.6	integral to membrane	1
C24G7.1	integral to membrane	1
	membrane	1
C24G7.2	integral to membrane	1
	intrinsic to membrane	1
	membrane	1
C24G7.4	integral to membrane	1
	membrane	1
C24H11.3	nucleus	1
C24H11.6	membrane	1
C24H11.7	intracellular	1
C24H11.8	integral to membrane	1
C25A1.11	intracellular	1
	nucleus	1
C25A1.5	endoplasmic reticulum	1
	integral to membrane	1
C25A1.7	cytoplasm	1
C25A1.9	centrosome	1
	protein phosphatase type 2A complex	1
C25A11.4	apical junction complex	1
	apicolateral plasma membrane	1
	cell-cell adherens junction	1
	integral to membrane	1
C25B8.1	integral to membrane	1
	membrane	1
	voltage-gated potassium channel complex	1
C25B8.4	integral to membrane	1
C25D7.6	nucleus	1
C25D7.7	intracellular	1
C25E10.2	integral to membrane	1
C25E10.3	integral to membrane	1
C25E10.4	integral to membrane	1
C25E10.5	integral to membrane	1
C25F6.2	adherens junction	1
	zonula adherens	1
C25F6.3	cytoplasm	1
C25F6.4	integral to membrane	1
C25F6.7	integral to membrane	1
C25G4.4	nucleus	1
C25G6.2	integral to membrane	1
C25G6.5	integral to membrane	1
C25H3.9	integral to membrane	1
C26B2.6	Elongator holoenzyme complex	1
C26C6.1	intracellular	1
	nucleus	1
C26C6.2	cell cortex	1
	cytoplasm	1
	nucleus	1
C26D10.2	nucleus	1
C26E6.12	integral to membrane	1
	intracellular	1
C26E6.5	neuron projection	1
C26E6.6	intracellular	1
	ribosome	1
C26E6.9	nucleus	1
C26F1.2	integral to membrane	1
C26F1.4	intracellular	1
	ribosome	1
C26F1.7	integral to membrane	1
C26F1.9	intracellular	1
	ribosome	1
C26G2.1	integral to membrane	1
	integral to plasma membrane	1
C26H9A.1	integral to membrane	1
	proton-transporting two-sector ATPase complex, proton-transporting domain	1
C27A12.5	nucleus	1
C27A12.9	integral to membrane	1
C27A2.1	chromosome	1
C27A2.2	intracellular	1
	ribosome	1
C27A2.5	extracellular region	1
C27A2.6	cell cortex	1
	intracellular	1
C27A2.7	intracellular	1
C27A7.1	integral to membrane	1
C27A7.3	integral to membrane	1
C27A7.4	intraflagellar transport particle A	1
C27B7.1	nucleus	1
C27B7.4	integral to membrane	1
C27B7.8	intracellular	1
C27C12.2	intracellular	1
C27C12.4	integral to membrane	1
C27C12.6	nucleus	1
C27C12.7	integral to membrane	1
	membrane	1
C27D6.4	nucleus	1
C27F2.2	integral to membrane	1
	membrane	1
C27F2.8	integral to membrane	1
C27H5.3	intracellular	1
C27H5.4	integral to membrane	1
C27H5.8	integral to membrane	1
	membrane	1
	postsynaptic membrane	1
C27H6.1	clathrin adaptor complex	1
	synapse	1
C28A5.4	nucleus	1
C28C12.10	intracellular	1
C28C12.7	lysosome	1
C28D4.2	cell cortex	1
	cytoplasm	1
C28G1.3	exocyst	1
C28G1.5	intracellular	1
C28G1.6	intracellular	1
C28H8.12	centrosome	1
	cytoplasm	1
	dynactin complex	1
	pericentriolar material	1
	spindle microtubule	1
C28H8.3	cytoplasm	1
C28H8.4	integral to membrane	1
C28H8.9	intracellular	1
C29A12.4	integral to membrane	1
C29E4.1	integral to membrane	1
C29E4.7	cytoplasm	1
C29E6.2	integral to membrane	1
	membrane	1
C29F3.1	fatty acid beta-oxidation multienzyme complex	1
	mitochondrion	1
C29F4.1	integral to membrane	1
C29F4.2	integral to membrane	1
C29F9.7	adherens junction	1
	integrin complex	1
C29H12.1	cytoplasm	1
C29H12.2	Golgi membrane	1
	integral to membrane	1
	membrane	1
C30A5.7	integral to membrane	1
	nucleus	1
C30B5.2	integral to membrane	1
C30C11.1	large ribosomal subunit	1
C30C11.2	proteasome complex	1
C30D11.1	integral to membrane	1
	membrane	1
C30F12.6	integral to membrane	1
C30F12.7	mitochondrion	1
C30F8.2	proton-transporting two-sector ATPase complex, proton-transporting domain	1
	proton-transporting V-type ATPase, V0 domain	1
C30F8.4	focal adhesion	1
C30G12.7	intracellular	1
C30G7.1	intermediate filament cytoskeleton	1
	nucleolus	1
	nucleosome	1
	nucleus	1
C30H6.2	integral to membrane	1
	membrane	1
C30H6.6	integral to membrane	1
C31B8.8	extracellular matrix	1
C31E10.6	integral to membrane	1
C31E10.7	integral to membrane	1
C31E10.8	integral to membrane	1
	intracellular	1
	membrane	1
C31H2.1	intracellular	1
C31H5.3	integral to membrane	1
	membrane	1
	postsynaptic membrane	1
C32A3.1	nucleus	1
C32A3.3	integral to membrane	1
C32C4.1	integral to membrane	1
	membrane	1
	voltage-gated potassium channel complex	1
C32C4.2	cell soma	1
	cilium	1
	integral to membrane	1
	membrane	1
C32C4.7	integral to membrane	1
C32D5.2	integral to membrane	1
	membrane	1
C32D5.9	autophagic vacuole	1
	cytoplasm	1
C32E12.5	nucleus	1
C32E8.10	clathrin coat	1
	presynaptic membrane	1
C32E8.2	intracellular	1
	ribosome	1
C32E8.7	cytoplasm	1
C32E8.8	integral to membrane	1
	membrane	1
C32F10.2	nucleus	1
C32F10.5	nucleus	1
C33A11.2	integral to membrane	1
C33A11.4	nucleus	1
C33A12.1	mitochondrial inner membrane	1
C33A12.6	integral to membrane	1
C33C12.3	lysosome	1
C33C12.8	lysosome	1
C33C12.9	cytoplasm	1
C33D12.1	nucleus	1
C33D12.2	integral to membrane	1
C33D12.6	intracellular	1
	ribosome	1
C33D12.7	nucleus	1
C33D9.1	apical cortex	1
	intracellular	1
C33F10.12	membrane	1
C33F10.14	cytoplasm	1
C33F10.2	intracellular	1
C33F10.5	integral to membrane	1
C33G3.1	axon	1
	striated muscle dense body	1
C33H5.12	nucleus	1
C33H5.14	integral to membrane	1
C33H5.17	intracellular	1
C33H5.18	integral to membrane	1
	membrane	1
C33H5.19	integral to membrane	1
C33H5.9	cytoplasm	1
C34B2.10	endoplasmic reticulum	1
	integral to membrane	1
	signal peptidase complex	1
C34B2.8	integral to membrane	1
C34B4.1	cytoskeleton	1
C34B7.3	integral to membrane	1
C34B7.4	nucleus	1
C34C12.4	integral to membrane	1
C34C12.8	mitochondrion	1
C34C6.8	nucleus	1
C34D1.3	cell soma	1
C34D10.1	integral to membrane	1
C34D4.14	intracellular	1
C34D4.15	integral to membrane	1
C34D4.4	integral to membrane	1
C34D4.9	integral to membrane	1
C34E10.1	outer membrane	1
C34E10.4	cytoplasm	1
	integral to membrane	1
	peroxisomal membrane	1
C34E10.5	cytoplasm	1
	nucleus	1
C34E10.6	cilium	1
	mitochondrion	1
	proton-transporting ATP synthase complex, catalytic core F(1)	1
	proton-transporting two-sector ATPase complex	1
	proton-transporting two-sector ATPase complex, catalytic domain	1
C34E10.7	nucleus	1
C34F11.9	intracellular	1
C34F6.10	integral to membrane	1
C34F6.2	integral to membrane	1
C34F6.3	integral to membrane	1
C34F6.4	integral to membrane	1
C34F6.7	integral to membrane	1
C34G6.4	integral to membrane	1
	organelle membrane	1
C34G6.7	early endosome	1
C34H3.1	integral to membrane	1
C34H3.2	intracellular	1
C34H4.4	integral to membrane	1
C34H4.5	intracellular	1
C35A11.4	integral to membrane	1
	membrane	1
C35A5.1	cell surface	1
	integral to membrane	1
	membrane	1
C35A5.2	integral to membrane	1
C35B8.1	integral to membrane	1
C35B8.2	intracellular	1
	phosphoinositide 3-kinase complex	1
C35C5.10	integral to membrane	1
C35C5.11	integral to membrane	1
C35C5.2	integral to membrane	1
C35C5.4	internal side of plasma membrane	1
	intracellular	1
	neuron projection	1
C35D10.1	integral to membrane	1
C35D10.10	integral to membrane	1
C35D10.14	integral to membrane	1
C35D10.15	integral to membrane	1
C35D10.16	cytoskeleton	1
C36A4.1	integral to membrane	1
C36A4.2	integral to membrane	1
C36A4.3	integral to membrane	1
C36A4.5	integral to membrane	1
C36A4.6	integral to membrane	1
C36B1.1	basement membrane	1
	cell junction	1
	extracellular matrix	1
C36B1.12	integral to membrane	1
C36B1.4	proteasome core complex	1
	proteasome core complex, alpha-subunit complex	1
C36B7.6	integral to membrane	1
C36E6.3	muscle myosin complex	1
C36E8.3	integral to membrane	1
C36E8.5	microtubule	1
	protein complex	1
	spindle microtubule	1
	tubulin complex	1
C36F7.1	nucleus	1
C37A2.4	cyclin-dependent protein kinase holoenzyme complex	1
	nucleus	1
C37A2.6	cytoplasm	1
C37A2.7	intracellular	1
	ribosome	1
C37A5.1	integral to membrane	1
C37C3.12	integral to membrane	1
C37C3.6	extracellular matrix	1
	proteinaceous extracellular matrix	1
C37C3.7	integral to membrane	1
C37E2.1	mitochondrion	1
C37E2.2	integral to membrane	1
C37E2.3	integral to membrane	1
C37E2.5	chromosome, telomeric region	1
	nucleus	1
C37H5.6	cytoplasm	1
C37H5.8	mitochondrion	1
C38C10.1	integral to membrane	1
C38C10.2	integral to membrane	1
C38C10.5	Srb-mediator complex	1
C38C3.5	cytoplasm	1
	intracellular	1
	striated muscle thin filament	1
C38C6.2	integral to membrane	1
	plasma membrane	1
C38D4.3	nuclear envelope	1
C38D4.5	intracellular	1
C38D4.6	condensed nuclear chromosome	1
	nucleus	1
C38D4.8	cilium axoneme	1
	cytoplasm	1
	cytosol	1
	dendrite	1
	intracellular	1
	nucleus	1
C38D4.9	cytoplasm	1
C38H2.1	intracellular	1
C38H2.2	integral to membrane	1
	membrane	1
C39B10.2	integral to membrane	1
	membrane	1
	postsynaptic membrane	1
C39E6.4	nucleus	1
C39E6.6	integral to membrane	1
C39E9.10	integral to membrane	1
C39E9.13	nucleus	1
C39E9.2	extracellular region	1
C39E9.3	integral to membrane	1
C39E9.4	extracellular region	1
C39E9.5	extracellular region	1
C39E9.6	extracellular region	1
C39E9.9	integral to membrane	1
C39F7.2	intracellular	1
C39F7.4	cytoplasm	1
	intracellular	1
	nucleus	1
C40A11.2	membrane	1
	voltage-gated potassium channel complex	1
C40A11.3	membrane	1
	voltage-gated potassium channel complex	1
C40A11.4	membrane	1
	voltage-gated potassium channel complex	1
C40A11.6	membrane	1
	voltage-gated potassium channel complex	1
C40A11.7	membrane	1
	voltage-gated potassium channel complex	1
C40C9.1	integral to membrane	1
	membrane	1
C40C9.2	integral to membrane	1
	membrane	1
	postsynaptic membrane	1
C40C9.5	integral to membrane	1
C40H1.1	cytoplasm	1
C40H1.4	integral to membrane	1
C40H5.5	nucleus	1
C41C4.10	integral to membrane	1
	membrane	1
C41C4.4	integral to membrane	1
C41C4.5	integral to membrane	1
	membrane	1
C41C4.7	integral to membrane	1
C41D11.8	mitochondrion	1
C41D11.9	integral to membrane	1
C41D7.2	integral to membrane	1
	membrane	1
C41G7.1	nucleus	1
C41G7.5	intracellular	1
C41G7.9	integral to membrane	1
C42C1.10	integral to membrane	1
	membrane	1
	mitochondrial inner membrane	1
C42C1.14	intracellular	1
	ribosome	1
C42C1.16	integral to membrane	1
C42C1.2	protein serine/threonine phosphatase complex	1
C42C1.8	integral to membrane	1
C42D8.5	membrane	1
C42D8.8	cytoplasmic vesicle	1
	integral to membrane	1
C43C3.2	integral to membrane	1
C43E11.10	condensed nuclear chromosome	1
	cytoplasm	1
	nucleolus	1
	nucleus	1
C43E11.3	nucleus	1
C43E11.6	plasma membrane	1
	presynaptic active zone	1
	synapse part	1
C43E11.8	cis-Golgi network	1
	exocyst	1
	membrane	1
C43E11.9	nucleus	1
C43F9.8	membrane	1
C43G2.1	integral to membrane	1
C43G2.2	Golgi apparatus	1
	integral to membrane	1
C43G2.4	integral to membrane	1
C43H6.7	integral to membrane	1
C43H6.8	nucleus	1
C43H6.9	integral to membrane	1
	membrane	1
	outer membrane-bounded periplasmic space	1
C43H8.2	nucleus	1
C44B11.3	microtubule	1
	protein complex	1
C44B7.11	integral to membrane	1
C44B7.2	nucleus	1
C44B7.4	integral to membrane	1
C44B7.7	integral to membrane	1
C44B7.8	integral to membrane	1
	membrane	1
C44B7.9	integral to membrane	1
	membrane	1
C44B9.1	cytoplasm	1
C44C1.3	cell soma	1
C44C1.5	integral to membrane	1
C44C10.1	integral to membrane	1
C44C11.1	intracellular	1
C44E12.3	integral to membrane	1
	membrane	1
C44E4.4	nucleus	1
	ribonucleoprotein complex	1
C44F1.2	nucleus	1
C44F1.5	integral to membrane	1
	plasma membrane	1
C44H4.1	integral to membrane	1
C44H4.2	integral to membrane	1
C44H4.3	extracellular space	1
C44H9.1	integral to membrane	1
C45B11.6	integral to membrane	1
	membrane	1
C45B2.4	integral to membrane	1
	membrane	1
C45B2.7	integral to membrane	1
	membrane	1
C45E1.1	nucleus	1
C45G3.1	spindle	1
	spindle midzone	1
	spindle pole	1
C45H4.2	integral to membrane	1
C46A5.3	integral to membrane	1
C46A5.9	nucleus	1
C46C11.2	integral to membrane	1
C46E1.2	soluble fraction	1
C46F11.1	cell surface	1
	integral to membrane	1
C46F11.2	cytoplasm	1
C46F4.2	integral to membrane	1
C46G7.1	integral to membrane	1
C46H11.3	cytoskeleton	1
C47A10.1	integral to membrane	1
C47A4.2	integral to membrane	1
	membrane	1
C47B2.3	microtubule	1
	protein complex	1
C47B2.4	proteasome core complex	1
C47C12.3	cytoplasm	1
	intracellular	1
	nucleus	1
C47C12.4	intracellular	1
C47C12.6	integral to membrane	1
	membrane	1
C47D12.1	condensed chromosome	1
	histone acetyltransferase complex	1
	nucleus	1
C47D12.3	integral to membrane	1
	membrane	1
C47D12.6	cytoplasm	1
C47D2.2	intracellular	1
C47E12.1	cytoplasm	1
C47E12.2	integral to membrane	1
	membrane	1
	mitochondrial inner membrane	1
C47E12.3	membrane	1
C47E12.4	cytoplasm	1
	integral to membrane	1
C47E12.7	preribosome, small subunit precursor	1
C47E12.8	cytoplasm	1
C47E8.4	nucleus	1
C47E8.5	cytoplasm	1
	perinuclear region of cytoplasm	1
C47E8.7	cell-substrate junction	1
	plasma membrane	1
C47F8.3	membrane	1
C47F8.4	integral to membrane	1
	membrane	1
C47F8.5	integral to membrane	1
	membrane	1
C47F8.6	membrane	1
C47G2.2	nucleus	1
C47G2.3	integral to membrane	1
C47G2.4	integral to membrane	1
C48A7.1	integral to membrane	1
	membrane	1
	voltage-gated calcium channel complex	1
C48A7.2	integral to membrane	1
	membrane	1
	membrane coat	1
C48B4.1	peroxisome	1
C48B4.2	integral to membrane	1
C48B4.4	integral to membrane	1
	plasma membrane	1
C48B6.2	intracellular	1
C48C5.1	integral to membrane	1
C48D1.2	cytoplasm	1
	intracellular	1
	membrane	1
C48D1.3	axon	1
	cell soma	1
	integral to membrane	1
	membrane	1
	neuron projection	1
	synapse	1
	synaptic vesicle	1
C48D5.1	nucleus	1
C48E7.11	nucleus	1
C48E7.5	integral to membrane	1
C48E7.6	integral to membrane	1
C49A1.2	integral to membrane	1
C49A1.3	integral to membrane	1
C49A1.4	nucleus	1
C49A9.7	integral to membrane	1
C49A9.8	integral to membrane	1
C49C8.4	integral to membrane	1
C49F8.2	integral to membrane	1
C49H3.10	cytoplasm	1
	nucleus	1
C49H3.11	intracellular	1
	ribosome	1
	small ribosomal subunit	1
C49H3.9	nucleus	1
C50B6.4	integral to membrane	1
C50B8.2	intracellular	1
C50C3.6	spliceosome	1
C50C3.9	membrane	1
C50D2.2	integral to membrane	1
	membrane	1
C50D2.4	integral to membrane	1
C50D2.9	integral to membrane	1
C50E3.16	integral to membrane	1
	membrane	1
C50F2.3	intracellular	1
C50F4.13	intracellular	1
	nucleosome	1
	nucleus	1
C50F4.14	integral to membrane	1
C50F4.2	6-phosphofructokinase complex	1
	cytoplasm	1
C50F4.5	intracellular	1
	nucleosome	1
	nucleus	1
C50F4.7	intracellular	1
	nucleosome	1
	nucleus	1
C50H11.15	integral to membrane	1
C50H2.1	integral to membrane	1
	intracellular	1
	ribosome	1
C51E3.6	integral to membrane	1
	membrane	1
C51E3.7	axon	1
C52A11.4	integral to membrane	1
C52B11.2	membrane	1
	voltage-gated potassium channel complex	1
C52B11.3	integral to membrane	1
C52B9.4	integral to membrane	1
C52B9.6	integral to membrane	1
	membrane	1
C52D10.12	integral to membrane	1
C52D10.13	integral to membrane	1
C52E12.1	intracellular	1
C52E12.2	axon	1
	dendrite	1
C52E12.3	cytoplasm	1
	integral to membrane	1
C52E4.1	nucleus	1
C52E4.4	cytoplasm	1
C52E4.5	integral to membrane	1
	membrane	1
C53A5.13	integral to membrane	1
C53A5.2	integral to membrane	1
C53A5.3	cytoplasm	1
	germ cell nucleus	1
	histone deacetylase complex	1
	nucleus	1
	NuRD complex	1
C53A5.5	integral to membrane	1
C53B4.3	integral to membrane	1
C53B4.4	integral to membrane	1
C53B4.5	integral to membrane	1
C53B4.6	integral to membrane	1
C53B4.7	intracellular	1
C53B7.4	cilium	1
	mitochondrial proton-transporting ATP synthase complex, coupling factor F(o)	1
	mitochondrion	1
C53C11.3	integral to membrane	1
	membrane	1
C53C7.1	integral to membrane	1
C53C9.3	integral to membrane	1
	membrane	1
	voltage-gated potassium channel complex	1
C53D5.1	integral to membrane	1
C53D5.2	integral to membrane	1
C53D5.5	integral to membrane	1
C53D6.2	extracellular region	1
C53H9.1	intracellular	1
	ribosome	1
C53H9.2	integral to membrane	1
	intracellular	1
C54A12.1	integral to membrane	1
	membrane	1
C54A12.4	intracellular	1
C54C6.1	intracellular	1
	ribosome	1
C54C6.2	microtubule	1
	protein complex	1
C54C8.11	integral to membrane	1
	membrane	1
C54C8.2	integral to membrane	1
C54C8.3	membrane	1
C54C8.5	integral to membrane	1
	membrane	1
C54D1.1	integral to membrane	1
C54D1.5	extracellular matrix	1
	proteinaceous extracellular matrix	1
C54D1.6	cell-cell adherens junction	1
	cytoplasm	1
	membrane fraction	1
	nucleus	1
	soluble fraction	1
C54D10.1	integral to membrane	1
C54D10.2	integral to membrane	1
C54D2.5	integral to membrane	1
	membrane	1
	voltage-gated calcium channel complex	1
C54E4.5	cytoplasm	1
C54F6.13	integral to membrane	1
C54F6.4	integral to membrane	1
	membrane	1
C54G10.2	DNA replication factor C complex	1
C54G10.3	integral to membrane	1
	membrane	1
C54G10.4	membrane	1
C54G4.4	integral to membrane	1
C54G4.6	cytoplasm	1
C54G4.8	integral to membrane	1
C54G7.2	integral to membrane	1
C54G7.4	cilium axoneme	1
	microtubule basal body	1
C54H2.3	intracellular	1
C54H2.5	integral to membrane	1
C55B7.1	P granule	1
C55B7.12	intracellular	1
	nucleus	1
C55B7.2	Golgi stack	1
	integral to membrane	1
	nucleus	1
C55B7.5	prefoldin complex	1
C55B7.9	Srb-mediator complex	1
C55C3.1	integral to membrane	1
C56C10.13	integral to membrane	1
C56C10.8	mitochondrion	1
C56E6.2	cytoplasm	1
	intracellular	1
	nucleus	1
C56E6.5	integral to membrane	1
C56G2.1	integral to membrane	1
C56G2.6	integral to membrane	1
C56G2.7	cytoplasm	1
	nucleus	1
C56G7.3	cytoskeleton	1
CD4.3	intracellular	1
	ribosome	1
CD4.6	proteasome core complex	1
	proteasome core complex, alpha-subunit complex	1
cTel55X.1	integral to membrane	1
D1005.1	cytoplasm	1
D1005.3	integral to membrane	1
D1007.1	nucleus	1
D1007.12	intracellular	1
	ribosome	1
D1007.15	integral to membrane	1
D1007.5	integral to membrane	1
D1009.1	integral to membrane	1
D1009.2	nucleus	1
D1009.3	integral to membrane	1
D1009.5	cilium axoneme	1
D1014.3	endoplasmic reticulum	1
	Golgi apparatus	1
D1022.1	integral to membrane	1
D1025.2	glycine cleavage complex	1
	mitochondrion	1
D1037.1	intracellular	1
D1037.2	integral to membrane	1
D1037.4	cytoplasm	1
	intracellular	1
	nucleus	1
D1044.3	integral to membrane	1
D1046.3	integral to membrane	1
	membrane	1
D1046.5	integral to membrane	1
D1053.1	cytoplasm	1
D1054.2	proteasome core complex	1
	proteasome core complex, alpha-subunit complex	1
D1065.1	integral to membrane	1
D1073.1	integral to membrane	1
D1081.2	nucleus	1
D2013.1	intracellular	1
D2013.10	integral to membrane	1
D2013.8	integral to membrane	1
	membrane	1
D2021.2	integral to membrane	1
D2023.1	integral to membrane	1
D2023.2	cytoplasm	1
D2023.7	integral to membrane	1
D2024.3	integral to membrane	1
D2024.6	F-actin capping protein complex	1
D2024.7	mitochondrion	1
	outer membrane-bounded periplasmic space	1
D2030.1	integral to membrane	1
	membrane	1
D2030.2	intracellular	1
D2030.4	mitochondrion	1
D2030.6	P granule	1
D2030.9	nucleus	1
D2045.1	cytoplasm	1
D2045.6	cullin-RING ubiquitin ligase complex	1
D2045.8	membrane	1
	voltage-gated potassium channel complex	1
D2085.4	intracellular	1
D2085.6	integral to membrane	1
D2089.2	integral to membrane	1
D2089.4	nucleus	1
D2092.1	integral to membrane	1
D2092.3	integral to membrane	1
	membrane	1
	postsynaptic membrane	1
	synapse	1
D2092.4	integral to membrane	1
D2092.5	integral to membrane	1
D2096.2	integral to membrane	1
D2096.4	cytoplasm	1
	integral to membrane	1
D2096.8	nucleus	1
DC2.3	cis-Golgi network	1
	integral to membrane	1
DH11.3	integral to membrane	1
DY3.1	mitochondrial intermembrane space protein transporter complex	1
DY3.2	lamin filament	1
	nuclear envelope	1
	nuclear periphery	1
DY3.3	nucleus	1
DY3.7	integral to membrane	1
E01A2.10	integral to membrane	1
E01A2.7	integral to membrane	1
E01H11.1	cell soma	1
	insoluble fraction	1
	integral to membrane	1
	neuron projection	1
	soluble fraction	1
E02A10.1	intracellular	1
	ribosome	1
E02A10.2	integral to membrane	1
E02D9.1	integral to membrane	1
E02H1.2	intracellular	1
E02H4.1	integral to membrane	1
	membrane	1
E03A3.3	nucleosome	1
E03A3.4	nucleosome	1
E03G2.2	integral to membrane	1
E03H4.10	integral to membrane	1
E03H4.11	membrane	1
E03H4.12	integral to membrane	1
	membrane	1
E03H4.3	membrane	1
E03H4.8	membrane coat	1
E04A4.5	integral to membrane	1
	mitochondrial inner membrane	1
	mitochondrial inner membrane presequence translocase complex	1
E04A4.6	integral to membrane	1
E04A4.8	intracellular	1
	ribosome	1
E04F6.11	integral to membrane	1
	membrane	1
	plasma membrane	1
EEED8.7	nucleus	1
EEED8.9	cytoplasm	1
	mitochondrion	1
EGAP1.3	cell surface	1
	extracellular matrix	1
EGAP2.3	integral to membrane	1
EGAP7.1	integral to membrane	1
F01D4.1	integral to membrane	1
F01D4.2	integral to membrane	1
F01D4.4	axon	1
	cell soma	1
	cytoplasmic vesicle	1
	integral to membrane	1
F01D4.9	integral to membrane	1
F01D5.9	integral to membrane	1
F01E11.5	integral to membrane	1
F01F1.10	cytoplasm	1
F01F1.7	nucleus	1
F01F1.9	vacuole	1
F01G10.3	cytoplasm	1
F01G10.8	intracellular	1
F01G12.1	integral to membrane	1
F01G12.5	basement membrane	1
	collagen	1
F01G4.1	nucleus	1
F01G4.5	integral to membrane	1
F01G4.6	integral to membrane	1
	membrane	1
F02A9.6	cytoplasm	1
	endomembrane system	1
	integral to membrane	1
	lateral plasma membrane	1
	membrane	1
	plasma membrane	1
F02C12.5	integral to membrane	1
F02C9.3	integral to membrane	1
	membrane	1
F02D10.5	integral to membrane	1
	membrane	1
F02D8.3	cilium axoneme	1
	cilium part	1
F02E11.1	integral to membrane	1
	membrane	1
F02E11.5	extracellular region	1
F02E8.1	mitochondrial proton-transporting ATP synthase complex, coupling factor F(o)	1
F02E8.2	integral to membrane	1
F02E8.3	cell	1
	membrane coat	1
F02E8.5	integral to membrane	1
F02E8.6	integral to membrane	1
	late endosome	1
	lysosome	1
	membrane	1
F02E9.2	cytoplasm	1
	soluble fraction	1
F02E9.4	nucleus	1
F02E9.7	integral to membrane	1
F02E9.9	cytoplasm	1
F02G3.1	integral to membrane	1
	membrane	1
F07A11.2	cytoplasm	1
F07A5.3	integral to membrane	1
	membrane	1
F07A5.7	myosin complex	1
	myosin filament	1
F07B10.1	cytoplasm	1
	integral to membrane	1
	membrane	1
F07B10.5	integral to membrane	1
	membrane	1
	postsynaptic membrane	1
F07B7.10	intracellular	1
	nucleosome	1
	nucleus	1
F07B7.11	intracellular	1
	nucleosome	1
	nucleus	1
F07B7.3	intracellular	1
	nucleosome	1
	nucleus	1
F07B7.4	intracellular	1
	nucleosome	1
	nucleus	1
F07B7.5	nucleosome	1
F07B7.9	intracellular	1
	nucleosome	1
	nucleus	1
F07C3.1	integral to membrane	1
	membrane	1
F07C3.4	axon	1
	synapse	1
F07C3.7	integral to membrane	1
	membrane	1
F07D10.1	intracellular	1
	ribosome	1
F07F6.6	integral to membrane	1
	integral to plasma membrane	1
	membrane	1
	neuron projection	1
	outer membrane-bounded periplasmic space	1
	synapse	1
F07F6.7	extracellular region	1
	integral to membrane	1
F07H5.2	integral to membrane	1
	sarcoglycan complex	1
F08A10.1	integral to membrane	1
	membrane	1
F08A8.1	peroxisome	1
F08A8.2	peroxisome	1
F08A8.3	peroxisome	1
F08A8.4	peroxisome	1
F08B1.1	cytoplasm	1
	nucleus	1
F08B1.2	integral to membrane	1
F08B12.1	integral to membrane	1
F08B12.2	integral to membrane	1
	peroxisomal membrane	1
F08B12.3	axon	1
	integral to membrane	1
	membrane	1
F08B4.2	integral to membrane	1
	membrane	1
	plasma membrane	1
F08B4.5	nucleus	1
F08B6.2	heterotrimeric G-protein complex	1
F08C6.4	integral to membrane	1
	membrane	1
F08C6.6	integral to membrane	1
F08C6.7	intracellular	1
	M band	1
	nucleus	1
F08D12.1	signal recognition particle	1
F08F1.5	integral to membrane	1
	plasma membrane	1
F08F1.7	integral to membrane	1
F08F1.8	cytoplasm	1
F08F3.3	integral to membrane	1
	membrane	1
F08F3.7	integral to membrane	1
F08F8.2	integral to membrane	1
F08F8.3	axonemal heterotrimeric kinesin-II complex	1
	kinesin complex	1
F08F8.8	integral to membrane	1
F08G12.1	intracellular	1
F08G2.1	intracellular	1
	nucleosome	1
	nucleus	1
F08G2.2	intracellular	1
	nucleosome	1
	nucleus	1
F08G2.3	nucleosome	1
F08G5.2	integral to membrane	1
F08G5.4	integral to membrane	1
F09A5.1	integral to membrane	1
F09A5.4	integral to membrane	1
F09B12.2	integral to membrane	1
F09B12.3	integral to membrane	1
F09B9.3	integral to membrane	1
F09B9.5	extracellular region	1
F09C3.1	intracellular	1
F09C8.1	integral to membrane	1
F09E5.1	apical plasma membrane	1
	cell cortex	1
	cortical actin cytoskeleton	1
	insoluble fraction	1
	soluble fraction	1
F09E5.11	integral to membrane	1
F09E5.15	cytoplasm	1
F09E5.3	cytoplasm	1
F09E5.4	integral to membrane	1
	membrane	1
F09E8.2	integral to membrane	1
F09E8.5	extracellular region	1
F09E8.7	cell soma	1
	integral to membrane	1
	membrane	1
	neuron projection	1
	postsynaptic membrane	1
F09G2.3	integral to membrane	1
	membrane	1
F09G2.5	integral to membrane	1
	membrane	1
	postsynaptic membrane	1
F09G2.6	integral to membrane	1
F09G2.8	integral to membrane	1
F09G8.3	intracellular	1
	ribosome	1
F09G8.4	integral to membrane	1
	membrane	1
F09G8.5	integral to membrane	1
F09G8.6	integral to membrane	1
F10B5.1	intracellular	1
	ribosome	1
F10B5.9	integral to membrane	1
F10C1.5	nucleus	1
F10C2.5	membrane	1
F10C2.6	cytoplasm	1
F10C5.1	anaphase-promoting complex	1
F10C5.2	integral to membrane	1
F10D2.11	integral to membrane	1
F10D2.2	integral to membrane	1
F10D2.5	integral to membrane	1
F10D2.6	integral to membrane	1
F10D2.7	integral to membrane	1
F10D2.9	endoplasmic reticulum membrane	1
	integral to membrane	1
F10D7.2	integral to membrane	1
F10E7.2	integral to membrane	1
F10E7.3	integral to membrane	1
F10E7.5	intracellular	1
F10E7.7	intracellular	1
	ribosome	1
F10E7.9	integral to membrane	1
	membrane	1
F10E9.6	filamentous actin	1
F10F2.1	cytoplasm	1
	perinuclear region of cytoplasm	1
F10G7.1	nucleus	1
F10G7.2	cytosol	1
	nucleus	1
	RNA-induced silencing complex	1
F10G7.3	nucleus	1
F10G7.4	nuclear chromosome	1
	nucleus	1
F10G7.5	integral to membrane	1
F10G8.7	nucleus	1
F11A1.3	nucleus	1
F11A10.3	nucleolus	1
	nucleus	1
F11A10.5	integral to membrane	1
F11A10.6	integral to membrane	1
F11A5.10	integral to membrane	1
	membrane	1
	postsynaptic membrane	1
F11A5.12	integral to membrane	1
F11C1.3	integral to membrane	1
	membrane	1
F11C1.5	intracellular	1
	ribosome	1
F11C1.6	nucleus	1
F11C3.2	integral to membrane	1
F11C3.3	muscle myosin complex	1
	myosin complex	1
F11C7.1	integral to membrane	1
	membrane	1
	postsynaptic membrane	1
F11C7.3	extracellular region	1
F11C7.4	cytoplasm	1
	integral to membrane	1
F11D5.3	integral to membrane	1
F11E6.1	lysosome	1
F11E6.5	integral to membrane	1
F11E6.8	integral to membrane	1
F11G11.12	integral to membrane	1
F11G11.9	integral to membrane	1
F11H8.1	cytoplasm	1
	nucleus	1
F11H8.2	integral to membrane	1
	membrane	1
	postsynaptic membrane	1
F11H8.4	cleavage furrow	1
	contractile ring	1
	internal side of plasma membrane	1
F12B6.1	integral to membrane	1
F12F3.1	integral to membrane	1
	membrane	1
	voltage-gated potassium channel complex	1
F12F6.3	membrane	1
F12F6.5	intracellular	1
F12F6.6	COPII vesicle coat	1
F13A7.10	cytoplasm	1
F13B10.1	axon	1
	intrinsic to membrane	1
F13B10.2	intracellular	1
	ribosome	1
F13B9.5	membrane	1
F13B9.8	integral to membrane	1
F13D11.1	integral to membrane	1
F13D11.2	intracellular	1
F13D12.2	cytoplasm	1
F13D12.6	integral to membrane	1
F13D12.7	heterotrimeric G-protein complex	1
F13E6.6	intracellular	1
F13G3.1	intracellular	1
F13G3.11	intracellular	1
	ribosome	1
F13G3.5	cytoplasm	1
F13G3.7	integral to membrane	1
	membrane	1
F13G3.9	integral to membrane	1
	nucleus	1
F13H10.3	integral to membrane	1
F13H10.4	integral to membrane	1
F13H10.5	integral to membrane	1
F13H6.1	intracellular	1
F13H8.11	integral to membrane	1
F13H8.4	integral to membrane	1
F14B4.1	membrane	1
F14B4.3	nucleus	1
F14B6.4	integral to membrane	1
	membrane	1
F14B6.6	membrane	1
F14B8.1	integral to membrane	1
F14B8.7	integral to membrane	1
F14D12.2	adherens junction	1
	cytoplasm	1
	integrin complex	1
	nucleus	1
	striated muscle dense body	1
F14D12.4	integral to membrane	1
	membrane	1
	neuron projection	1
	neuron projection membrane	1
F14D12.5	basolateral plasma membrane	1
	cilium	1
	integral to membrane	1
	membrane	1
F14D12.6	integral to membrane	1
F14D7.6	integral to membrane	1
F14E5.2	integral to membrane	1
	membrane	1
F14E5.3	integral to membrane	1
F14E5.6	integral to membrane	1
F14F11.1	integral to membrane	1
	membrane	1
	voltage-gated potassium channel complex	1
F14F3.1	cytoplasm	1
	nucleus	1
F14F3.3	integral to membrane	1
	microsome	1
F14F4.1	integral to membrane	1
F14F4.3	integral to membrane	1
F14F7.2	integral to membrane	1
F14F7.3	integral to membrane	1
F14H12.1	integral to membrane	1
F14H3.10	integral to membrane	1
F14H3.2	integral to membrane	1
F14H8.6	integral to membrane	1
	membrane	1
F15A2.1	integral to membrane	1
F15A2.2	integral to membrane	1
F15A2.6	axon	1
	dendrite	1
F15A8.5	integral to membrane	1
F15B10.1	Golgi membrane	1
	integral to membrane	1
	membrane	1
F15B9.7	integral to membrane	1
	membrane	1
	plasma membrane	1
F15C11.1	intracellular	1
F15D3.1	intracellular	1
F15D3.7	mitochondrial inner membrane	1
F15D4.3	integral to membrane	1
F15G9.4	basement membrane	1
F15H10.1	integral to membrane	1
F15H10.2	integral to membrane	1
F15H10.3	anaphase-promoting complex	1
F16A11.3	integral to membrane	1
F16B3.1	integral to membrane	1
	membrane	1
F16B4.8	intracellular	1
F16D3.1	microtubule	1
	protein complex	1
F16D3.7	integral to membrane	1
F16F9.1	integral to membrane	1
F16F9.4	integral to membrane	1
F16F9.5	integral to membrane	1
	membrane	1
F16H11.1	integral to membrane	1
F16H11.3	integral to membrane	1
	membrane	1
F16H11.4	nucleus	1
F17A2.5	nucleus	1
F17A9.3	nucleus	1
F17C11.3	integral to membrane	1
F17C11.7	GPI-anchor transamidase complex	1
	integral to membrane	1
F17C11.9	eukaryotic translation elongation factor 1 complex	1
F17C8.1	integral to membrane	1
	plasma membrane	1
F17C8.2	integral to membrane	1
F17C8.4	intracellular	1
F17E5.1	cell junction	1
F17E5.2	membrane	1
	mitochondrial inner membrane	1
F17E9.1	integral to membrane	1
F17E9.10	nucleosome	1
F17E9.12	intracellular	1
	nucleosome	1
	nucleus	1
F17E9.13	intracellular	1
	nucleosome	1
	nucleus	1
F17E9.7	integral to membrane	1
	membrane	1
	postsynaptic membrane	1
F17E9.8	integral to membrane	1
	membrane	1
	postsynaptic membrane	1
F17E9.9	intracellular	1
	nucleosome	1
	nucleus	1
F18A1.5	nucleus	1
F18A11.1	cytoplasm	1
F18A11.5	membrane	1
	voltage-gated potassium channel complex	1
F18A12.8	integral to membrane	1
F18C12.1	cilium	1
F18C12.2	endosome membrane	1
F18C5.2	chromosome	1
	intracellular	1
	nucleoplasm	1
	nucleus	1
F18E2.3	chromatin	1
	condensed chromosome	1
F18F11.3	integral to membrane	1
	membrane	1
	plasma membrane	1
F18G5.4	integral to membrane	1
	membrane	1
	postsynaptic membrane	1
F18H3.5	cell	1
	integral to membrane	1
F19B6.4	integral to membrane	1
	membrane	1
F19D8.1	integral to membrane	1
	membrane	1
F19H6.4	integral to membrane	1
	membrane	1
F19H8.3	cytoplasm	1
	intracellular	1
	nucleus	1
F20A1.7	integral to membrane	1
[truncated: 4,522 more rows]

## Sheet: B) cc-focused report
Count of Gene ID
GO Term	Gene ID	Total
6-phosphofructokinase complex	C50F4.2	1
	Y71H10A.1	1
6-phosphofructokinase complex Total		2
A band	B0547.1	1
	C09D1.1	1
	ZK617.1	1
A band Total		3
actin cytoskeleton	F42G4.3	1
	K03E6.6	1
	R13H4.4	1
	Y18D10A.20	1
	Y23H5A.5	1
	ZC477.9	1
actin cytoskeleton Total		6
actin filament	T04C12.5	1
	Y54F10AM.2	1
	Y55F3AL.1	1
actin filament Total		3
actomyosin, actin part	C04F6.4	1
actomyosin, actin part Total		1
adherens junction	C09D8.1	1
	C25F6.2	1
	C29F9.7	1
	F14D12.2	1
	K01A6.2	1
	K04G2.8	1
adherens junction Total		6
alae of collagen and cuticulin-based cuticle extracellular matrix	ZK1193.1	1
alae of collagen and cuticulin-based cuticle extracellular matrix Total		1
anaphase-promoting complex	F10C5.1	1
	F15H10.3	1
	W10C6.1	1
	Y48G1C.12	1
anaphase-promoting complex Total		4
anchored to external side of plasma membrane	Y37E11AR.6	1
anchored to external side of plasma membrane Total		1
annular furrow extracellular matrix	F46C8.6	1
annular furrow extracellular matrix Total		1
annuli extracellular matrix	ZK1193.1	1
annuli extracellular matrix Total		1
AP-1 adaptor complex	M110.5	1
AP-1 adaptor complex Total		1
AP-2 adaptor complex	M110.5	1
AP-2 adaptor complex Total		1
apical cortex	C33D9.1	1
	T25C8.2	1
apical cortex Total		2
apical junction complex	C25A11.4	1
	F49C12.13	1
	Y105E8A.22	1
apical junction complex Total		3
apical part of cell	C18D11.2	1
	F54E7.3	1
	VW02B12L.1	1
apical part of cell Total		3
apical plasma membrane	B0495.4	1
	F09E5.1	1
	F29D11.1	1
	F40E10.3	1
	F40F9.9	1
	F49C12.13	1
	F53A2.8	1
	F56H1.1	1
	K04E7.2	1
	K12G11.1	1
	K12G11.2	1
	R107.8	1
	R31.1	1
	T20G5.1	1
	VW02B12L.1	1
	Y105E8A.22	1
	Y49E10.11	1
	ZK1067.1	1
	ZK1151.1	1
	ZK265.1	1
apical plasma membrane Total		20
apicolateral plasma membrane	C25A11.4	1
	ZK265.1	1
apicolateral plasma membrane Total		2
aster	C18E9.11	1
	F22B5.1	1
	T03F6.5	1
	Y69A2AR.2	1
aster Total		4
astral microtubule	K07C11.2	1
	Y59A8B.7	1
	ZK593.5	1
astral microtubule Total		3
autophagic vacuole	C32D5.9	1
autophagic vacuole Total		1
autosome	Y37D8A.9	1
autosome Total		1
axon	B0336.6	1
	B0432.5	1
	B0478.1	1
	C01B7.6	1
	C01G10.11	1
	C01G6.8	1
	C02F4.2	1
	C07F11.1	1
	C09B8.7	1
	C09H6.3	1
	C33G3.1	1
	C48D1.3	1
	C51E3.7	1
	C52E12.2	1
	F01D4.4	1
	F07C3.4	1
	F08B12.3	1
	F13B10.1	1
	F15A2.6	1
	F26C11.2	1
	F27D9.1	1
	F35C8.3	1
	F41C6.1	1
	F53F10.4	1
	F54B11.6	1
	F55B12.3	1
	F55C7.7	1
	F56A8.7	1
	F59A6.1	1
	F59F5.6	1
	H42K12.1	1
	K01C8.3	1
	K02E10.8	1
	K03D3.10	1
	K03E6.5	1
	K07E3.8	1
	M01D7.7	1
	M03A1.1	1
	M04C9.5	1
	M142.1	1
	R11G1.4	1
	T01C8.1	1
	T07A5.6	1
	T07A9.6	1
	T10A3.1	1
	T10H9.4	1
	W09C5.5	1
	Y37D8A.23	1
	Y37E11AR.6	1
	Y73F8A.1	1
	ZK1098.10	1
	ZK1248.3	1
	ZK897.1	1
axon Total		53
axonemal heterotrimeric kinesin-II complex	F08F8.3	1
	F20C5.2	1
	Y50D7A.6	1
axonemal heterotrimeric kinesin-II complex Total		3
basal lamina	F41G3.12	1
	F42A6.9	1
basal lamina Total		2
basal part of cell	C18D11.2	1
	F54E7.3	1
	F54F3.1	1
basal part of cell Total		3
basal plasma membrane	ZK1151.1	1
basal plasma membrane Total		1
basement membrane	C36B1.1	1
	F01G12.5	1
	F15G9.4	1
	K04H4.1	1
	K08C7.3	1
	T21B6.1	1
	T22A3.8	1
	W03F8.5	1
	ZC101.2	1
basement membrane Total		9
basolateral plasma membrane	F14D12.5	1
	F26D11.11	1
	F32A5.5	1
	F52D10.1	1
	F56A8.7	1
	K09C8.1	1
	R03E9.3	1
	W03D8.6	1
	Y49E10.11	1
	ZK1067.1	1
	ZK287.2	1
basolateral plasma membrane Total		11
beta-galactosidase complex	T19B10.3	1
beta-galactosidase complex Total		1
box H/ACA snoRNP complex	F25H8.2	1
	Y66H1A.4	1
box H/ACA snoRNP complex Total		2
BRCA1-BARD1 complex	K04C2.4	1
BRCA1-BARD1 complex Total		1
brush border	Y57G11C.24	1
brush border Total		1
cAMP-dependent protein kinase complex	F55A8.2	1
	R07E4.6	1
	T20G5.5	1
cAMP-dependent protein kinase complex Total		3
caveola	T13F2.8	1
caveola Total		1
cell	C02H7.3	1
	C07F11.1	1
	C23H4.1	1
	F02E8.3	1
	F18H3.5	1
	F25H8.3	1
	F32D8.6	1
	F49E8.4	1
	F58A3.2	1
	F59A6.1	1
	M05D6.7	1
	W08D2.1	1
	W09B12.1	1
	Y110A7A.10	1
	Y39B6A.20	1
	Y44E3A.2	1
	Y47D3B.10	1
	Y75B12B.5	1
	ZC64.4	1
cell Total		19
cell cortex	C01G8.5	1
	C06G3.2	1
	C07G1.4	1
	C26C6.2	1
	C27A2.6	1
	C28D4.2	1
	F09E5.1	1
	F20G4.3	1
	F26H9.6	1
	F30H5.1	1
	F49E11.1	1
	F49E7.1	1
	H39E23.1	1
	K04G2.8	1
	K09H11.3	1
	M117.2	1
	R07G3.1	1
	T03F6.5	1
	T04C12.5	1
	T05C12.6	1
	T13F2.8	1
	T19E10.1	1
	T21E12.4	1
	T26E3.3	1
	W06F12.1	1
	W09C5.5	1
	Y49E10.19	1
	Y51H4A.3	1
	Y59A8B.14	1
	Y59A8B.7	1
	Y69A2AR.2	1
	Y76A2B.1	1
	Y95B8A.5	1
	ZK593.5	1
	ZK792.6	1
cell cortex Total		35
cell cortex of cell tip	Y76A2B.1	1
cell cortex of cell tip Total		1
cell junction	C04D8.1	1
	C36B1.1	1
	F17E5.1	1
	F28D1.10	1
	F56A11.1	1
	K11C4.3	1
	T22C8.8	1
	Y50D4C.1	1
	Y54G11A.10	1
cell junction Total		9
cell leading edge	C07G1.4	1
	Y50D4C.1	1
	Y71F9AL.16	1
cell leading edge Total		3
cell projection	C01G6.8	1
	C12D12.2	1
	F25G6.3	1
cell projection Total		3
cell soma	B0212.5	1
	B0228.5	1
	B0336.6	1
	B0478.1	1
	C01G10.11	1
	C02F4.2	1
	C05E11.1	1
	C06E1.4	1
	C09B8.7	1
	C09H6.2	1
	C32C4.2	1
	C34D1.3	1
	C44C1.3	1
	C48D1.3	1
	E01H11.1	1
	F01D4.4	1
	F09E8.7	1
	F23H11.8	1
	F33E2.2	1
	F35C8.3	1
	F35H10.4	1
	F38A6.2	1
	F46F6.4	1
	F52A8.2	1
	F56A8.7	1
	F59A6.1	1
	H42K12.1	1
	K01C8.3	1
	K08E3.7	1
	M01D7.7	1
	M02B7.3	1
	M04C9.5	1
	R13A1.4	1
	R31.3	1
	T01C8.1	1
	T07A5.6	1
	T07A9.6	1
	T08G11.5	1
	T13C5.1	1
	T14A8.1	1
	T23H2.5	1
	T27C10.6	1
	W02G9.2	1
	W09C5.5	1
	Y110A7A.16	1
	Y37D8A.23	1
	Y53G8B.4	1
	Y55B1BM.1	1
	Y60A3A.1	1
	Y73F8A.1	1
	ZK1058.2	1
	ZK154.3	1
	ZK897.1	1
	ZK945.9	1
cell soma Total		54
cell soma membrane	B0034.3	1
	C01G6.8	1
	F43G9.6	1
cell soma membrane Total		3
cell surface	C17D12.6	1
	C35A5.1	1
	C46F11.1	1
	EGAP1.3	1
	F34D6.3	1
	F40E10.4	1
	F57C7.3	1
	K02G10.7	1
	K03D10.1	1
	K04B12.1	1
	Y71G12B.20	1
	ZK1058.2	1
cell surface Total		12
cell-cell adherens junction	C06C3.1	1
	C10H11.9	1
	C18F3.2	1
	C25A11.4	1
	C54D1.6	1
	F52B10.1	1
	K05C4.6	1
	R13H4.4	1
	W02B9.1	1
	Y105E8A.26	1
cell-cell adherens junction Total		10
cell-cell junction	K02C4.4	1
	K03E6.5	1
	T04B2.2	1
	T22D2.1	1
	Y48G1C.2	1
cell-cell junction Total		5
cell-substrate junction	C47E8.7	1
cell-substrate junction Total		1
cellular_component	C07G2.3	1
	C08B11.1	1
	F25B5.5	1
	F52F12.3	1
	Y39G10AL.3	1
	Y57G11C.11	1
	Y92H12BL.1	1
	ZK637.11	1
cellular_component Total		8
centriole	C05C8.9	1
	F59E12.2	1
centriole Total		2
centrosome	C09G9.6	1
	C14B9.4	1
	C25A1.9	1
	C28H8.12	1
	F22B5.7	1
	F38H4.9	1
	F48E8.5	1
	F49E11.1	1
	F58A4.8	1
	F59E12.2	1
	K04D7.1	1
	K07C11.2	1
	K09H11.3	1
	K11D9.1	1
	M03D4.1	1
	R07G3.1	1
	R107.6	1
	Y59A8B.7	1
	Y79H2A.11	1
	ZC513.6	1
	ZK546.1	1
	ZK593.5	1
centrosome Total		22
chromatin	F18E2.3	1
	F26F12.7	1
	F54F2.2	1
	H06O01.2	1
	K01G5.2	1
	K03D10.3	1
	K08H2.6	1
	T01G9.5	1
	T04D1.4	1
	T09A5.8	1
	T14G8.1	1
	VC5.4	1
	Y55B1BR.3	1
	ZK1236.2	1
	ZK131.5	1
chromatin Total		15
chromatin remodeling complex	F37A4.8	1
chromatin remodeling complex Total		1
chromosome	C27A2.1	1
	F18C5.2	1
	F28B3.7	1
	F35G12.8	1
	F49E11.1	1
	F54D5.14	1
	F56C9.1	1
	K12D12.1	1
	M01E5.5	1
	M106.1	1
	R05D3.1	1
	R13G10.1	1
	T05E11.4	1
	Y2H9A.1	1
	Y43F4B.6	1
	Y47D3A.26	1
	Y48C3A.14	1
	Y56A3A.27	1
	ZK1127.7	1
chromosome Total		19
chromosome, centromeric region	F20D12.4	1
	F35G12.8	1
	M106.1	1
chromosome, centromeric region Total		3
chromosome, telomeric region	C37E2.5	1
	F42A6.7	1
	F45E4.9	1
chromosome, telomeric region Total		3
cilium	C02F4.2	1
	C18H9.8	1
	C32C4.2	1
	C34E10.6	1
	C53B7.4	1
	F14D12.5	1
	F18C12.1	1
	F32A6.2	1
	F35G12.10	1
	F38G1.1	1
	M04C9.5	1
cilium Total		11
cilium axoneme	C02H7.1	1
	C38D4.8	1
	C54G7.4	1
	D1009.5	1
	F02D8.3	1
	F59C6.7	1
	T28F3.6	1
	Y105E8A.5	1
cilium axoneme Total		8
cilium part	F02D8.3	1
cilium part Total		1
cis-Golgi network	C43E11.8	1
	DC2.3	1
	F36D4.2	1
	T10F2.5	1
	W05H7.3	1
	Y71F9AM.4	1
cis-Golgi network Total		6
citrate lyase complex	C01G10.7	1
citrate lyase complex Total		1
clathrin adaptor complex	C27H6.1	1
	F53H8.1	1
	F55A12.7	1
	K11D2.3	1
	R160.1	1
	T20B5.1	1
	Y105E8A.9	1
	Y71H2B.10	1
clathrin adaptor complex Total		8
clathrin coat	C32E8.10	1
clathrin coat Total		1
clathrin coat of coated pit	F49E7.1	1
	T05B11.3	1
	T20G5.1	1
clathrin coat of coated pit Total		3
clathrin coat of trans-Golgi network vesicle	T05B11.3	1
	T20G5.1	1
clathrin coat of trans-Golgi network vesicle Total		2
clathrin-coated vesicle	M110.5	1
clathrin-coated vesicle Total		1
cleavage furrow	C02C6.1	1
	F11H8.4	1
	F20G4.3	1
	F30H5.1	1
	F46C8.6	1
	M03D4.1	1
	W09C5.2	1
	Y49E10.19	1
	Y50E8A.4	1
	Y51H4A.3	1
cleavage furrow Total		10
cohesin complex	F28B3.7	1
	Y47D3A.26	1
cohesin complex Total		2
collagen	F01G12.5	1
	K04H4.1	1
	T14B4.6	1
collagen Total		3
collagen and cuticulin-based cuticle extracellular matrix	F27C1.8	1
	T05C12.10	1
	W09H1.6	1
collagen and cuticulin-based cuticle extracellular matrix Total		3
condensed chromosome	B0207.4	1
	B0464.7	1
	C14B9.4	1
	C47D12.1	1
	F18E2.3	1
	F25E2.5	1
	F35G12.8	1
	M106.1	1
	T27F2.3	1
	Y110A7A.1	1
	Y47D3A.26	1
	ZK177.6	1
condensed chromosome Total		12
condensed chromosome kinetochore	ZK1055.1	1
condensed chromosome kinetochore Total		1
condensed chromosome, centromeric region	B0464.7	1
	Y110A7A.1	1
condensed chromosome, centromeric region Total		2
condensed nuclear chromosome	B0207.4	1
	C38D4.6	1
	C43E11.10	1
	T06E4.3	1
	Y39A1B.3	1
	Y43C5A.6	1
	Y43F4B.6	1
	Y47D3A.26	1
	Y51H7C.11	1
	ZK381.1	1
condensed nuclear chromosome Total		10
condensin complex	Y110A7A.1	1
condensin complex Total		1
contractile fiber	C10H11.9	1
	F52B10.1	1
	Y92H12A.1	1
contractile fiber Total		3
contractile ring	F11H8.4	1
contractile ring Total		1
COPI vesicle coat	F45G2.4	1
	T14G10.5	1
	T25F10.5	1
	Y25C1A.5	1
COPI vesicle coat Total		4
COPII vesicle coat	F12F6.6	1
	Y113G7A.3	1
	ZC518.2	1
COPII vesicle coat Total		3
core TFIIH complex	ZK1128.4	1
core TFIIH complex Total		1
cortical actin cytoskeleton	C07G1.4	1
	F09E5.1	1
cortical actin cytoskeleton Total		2
cortical endoplasmic reticulum	Y71F9B.3	1
cortical endoplasmic reticulum Total		1
cullin-RING ubiquitin ligase complex	D2045.6	1
	F45E12.3	1
	K06H7.6	1
	K08E7.7	1
	Y108G3AL.1	1
	ZK520.4	1
	ZK856.1	1
cullin-RING ubiquitin ligase complex Total		7
cyclin-dependent protein kinase 5 activator complex	T23F11.3	1
cyclin-dependent protein kinase 5 activator complex Total		1
cyclin-dependent protein kinase holoenzyme complex	C37A2.4	1
cyclin-dependent protein kinase holoenzyme complex Total		1
cytoplasm	4R79.2	1
	B0025.1	1
	B0035.16	1
	B0228.5	1
	B0261.2	1
	B0336.2	1
	B0336.6	1
	B0336.8	1
	B0348.6	1
	B0365.1	1
	B0464.1	1
	B0464.7	1
	B0478.1	1
	B0547.1	1
	C01G10.8	1
	C01G8.5	1
	C02D5.3	1
	C02F4.2	1
	C05D11.2	1
	C05D11.4	1
	C05D9.5	1
	C05H8.1	1
	C06A6.4	1
	C06C3.1	1
	C06G3.7	1
	C07H6.5	1
	C07H6.6	1
	C09G9.6	1
	C09H6.2	1
	C09H6.3	1
	C10C5.3	1
	C10C5.4	1
	C10C5.5	1
	C10E2.3	1
	C10F3.5	1
	C10H11.9	1
	C12C8.3	1
	C14B9.1	1
	C14B9.4	1
	C15F1.3	1
	C15F1.4	1
	C15H9.7	1
	C16C2.2	1
	C17D12.6	1
	C17H12.14	1
	C18A3.6	1
	C18C4.10	1
	C18C4.3	1
	C23H3.3	1
	C25A1.7	1
	C25F6.3	1
	C26C6.2	1
	C28D4.2	1
	C28H8.12	1
	C28H8.3	1
	C29E4.7	1
	C29H12.1	1
	C32D5.9	1
	C32E8.7	1
	C33C12.9	1
	C33F10.14	1
	C33H5.9	1
	C34E10.4	1
	C34E10.5	1
	C37A2.6	1
	C37H5.6	1
	C38C3.5	1
	C38D4.8	1
	C38D4.9	1
	C39F7.4	1
	C40H1.1	1
	C43E11.10	1
	C44B9.1	1
	C46F11.2	1
	C47C12.3	1
	C47D12.6	1
	C47E12.1	1
	C47E12.4	1
	C47E12.8	1
	C47E8.5	1
	C48D1.2	1
	C49H3.10	1
	C50F4.2	1
	C52E12.3	1
	C52E4.4	1
	C53A5.3	1
	C54D1.6	1
	C54E4.5	1
	C54G4.6	1
	C56E6.2	1
	C56G2.7	1
	D1005.1	1
	D1037.4	1
	D1053.1	1
	D2023.2	1
	D2045.1	1
	D2096.4	1
	EEED8.9	1
	F01F1.10	1
	F01G10.3	1
	F02A9.6	1
	F02E9.2	1
	F02E9.9	1
	F07A11.2	1
	F07B10.1	1
	F08B1.1	1
	F08F1.8	1
	F09E5.15	1
	F09E5.3	1
	F10C2.6	1
	F10F2.1	1
	F11C7.4	1
	F11H8.1	1
	F13A7.10	1
	F13D12.2	1
	F13G3.5	1
	F14D12.2	1
	F14F3.1	1
	F18A11.1	1
	F19H8.3	1
	F20D12.5	1
	F20D6.11	1
	F21H11.3	1
	F22B3.4	1
	F22B5.1	1
	F22B5.7	1
	F22B5.9	1
	F22D6.3	1
	F23F1.8	1
	F23F12.6	1
	F25B4.1	1
	F25B5.3	1
	F25E2.5	1
	F25H2.11	1
	F26B1.3	1
	F26F4.10	1
	F26H9.6	1
	F28C1.2	1
	F28F8.6	1
	F28H1.3	1
	F29G9.5	1
	F31E3.5	1
	F32D8.13	1
	F32E10.4	1
	F32G8.6	1
	F35A5.8	1
	F35C8.3	1
	F36H1.2	1
	F36H1.6	1
	F38B2.4	1
	F38B6.4	1
	F38E11.2	1
	F38H4.9	1
	F39H2.3	1
	F40E10.3	1
	F41C6.1	1
	F41H10.11	1
	F42A10.2	1
	F42G10.2	1
	F42G8.4	1
	F43D9.2	1
	F45E10.1	1
	F45E4.1	1
	F45H11.2	1
	F46B6.3	1
	F46F11.4	1
	F46H6.1	1
	F47B10.2	1
	F47F6.1	1
	F47G4.3	1
	F48F7.1	1
	F49D11.9	1
	F49E11.1	1
	F52B11.2	1
	F53A2.6	1
	F53C11.8	1
	F53F10.4	1
	F53G12.1	1
	F53G12.5	1
	F53H4.1	1
	F54A5.3	1
	F54C8.1	1
	F54C8.7	1
	F54C9.10	1
	F54C9.8	1
	F55B12.3	1
	F55C10.5	1
	F56C9.1	1
	F56D1.7	1
	F56F11.4	1
	F56G4.5	1
	F56H1.4	1
	F57H12.1	1
	F58B3.5	1
	F58E10.4	1
	F58G6.1	1
	F59B2.7	1
	F59F5.6	1
	H05G16.1	1
	H37A05.1	1
	H38K22.2	1
	K02B12.1	1
	K02C4.4	1
	K02E10.1	1
	K04A8.6	1
	K04D7.1	1
	K04G2.8	1
	K06A4.5	1
	K07A9.2	1
	K08A8.1	1
	K08E3.7	1
	K08E4.2	1
	K08F11.4	1
	K09A9.2	1
	K09B11.9	1
	K10B2.1	1
	K10B2.5	1
	K10F12.4	1
	K11C4.3	1
	K11H3.1	1
	LLC1.3	1
	M01B12.3	1
	M01D7.4	1
	M01D7.7	1
	M05B5.5	1
	M106.5	1
	M117.2	1
	M163.3	1
	M6.1	1
	R01H10.6	1
	R03G5.1	1
	R04A9.4	1
	R05D3.7	1
	R06F6.1	1
	R07B1.12	1
	R07B7.11	1
	R07E4.4	1
	R07E5.14	1
	R07G3.1	1
	R08D7.4	1
	R10E11.1	1
	R10E9.1	1
	R11A8.6	1
	R11G1.4	1
	R13A5.5	1
	R13H8.1	1
	R186.3	1
	R31.1	1
	R31.3	1
	R74.1	1
	T01B7.3	1
	T01C8.1	1
	T02G5.9	1
	T03F6.5	1
	T04B2.2	1
	T04C12.5	1
	T04C9.6	1
	T04D1.3	1
	T05C12.6	1
	T05G5.3	1
	T05H10.5	1
	T05H4.6	1
	T07A5.6	1
	T07A9.2	1
	T07A9.5	1
	T07D3.7	1
	T07D4.3	1
	T08B2.9	1
	T09B4.10	1
	T10F2.1	1
	T11G6.1	1
	T12A2.1	1
	T12F5.3	1
	T13C5.1	1
	T16G1.10	1
	T18D3.7	1
	T19B4.3	1
	T19E7.3	1
	T20F10.1	1
	T20H4.3	1
	T21E12.4	1
	T22H6.2	1
	T23G11.3	1
	T23H2.5	1
	T24D1.1	1
	T24F1.1	1
	T25E12.4	1
	T25G12.4	1
	T27C10.6	1
	T27F6.5	1
	W01H2.3	1
	W02B12.6	1
	W03B1.4	1
	W03C9.3	1
	W03F8.3	1
	W03G1.6	1
	W06B11.2	1
	W06D4.4	1
	W06F12.1	1
	W06H8.1	1
	W09C5.5	1
	Y105E8A.19	1
	Y105E8A.20	1
	Y105E8B.1	1
	Y105E8B.5	1
	Y106G6H.5	1
	Y10G11A.1	1
	Y110A7A.16	1
	Y113G7A.9	1
	Y113G7B.17	1
	Y116A8C.12	1
	Y119D3B.15	1
	Y18D10A.17	1
	Y22D7AL.10	1
	Y22D7AL.5	1
	Y23H5A.7	1
	Y24D9A.8	1
	Y24F12A.2	1
	Y37E3.17	1
	Y38A10A.5	1
	Y39A3CR.1	1
	Y39B6A.2	1
	Y39H10A.3	1
	Y41E3.4	1
	Y42G9A.4	1
	Y43F8C.6	1
	Y45F3A.2	1
	Y46H3A.3	1
	Y47D3A.25	1
	Y47D3A.6	1
	Y47H9C.6	1
	Y48G1A.5	1
	Y48G8AL.6	1
	Y49E10.1	1
	Y49E10.11	1
	Y51H4A.17	1
	Y53C12B.3	1
	Y53G8B.1	1
	Y54E10A.15	1
	Y54E10A.4	1
	Y54E10A.9	1
	Y54E10BR.2	1
	Y55B1BM.1	1
	Y57A10A.30	1
	Y57G11C.13	1
	Y59A8B.14	1
	Y60A3A.13	1
	Y62E10A.9	1
	Y63D3A.5	1
	Y65B4BR.4	1
	Y66D12A.23	1
	Y71F9AL.16	1
	Y71F9AL.5	1
	Y71F9B.7	1
	Y71F9B.9	1
	Y71G12B.12	1
	Y71H10A.1	1
	Y71H2AM.19	1
	Y79H2A.11	1
	Y80D3A.1	1
	Y82E9BR.14	1
	Y87G2A.5	1
	Y92C3B.3	1
	Y94H6A.7	1
	ZC308.1	1
	ZC404.3	1
	ZC404.8	1
	ZC434.5	1
	ZC434.9	1
	ZC513.6	1
	ZK112.2	1
	ZK1128.2	1
	ZK1320.6	1
	ZK177.6	1
	ZK180.4	1
	ZK270.2	1
	ZK384.3	1
	ZK520.4	1
	ZK524.3	1
	ZK593.5	1
	ZK632.8	1
	ZK637.10	1
	ZK783.2	1
	ZK858.4	1
	ZK973.6	1
cytoplasm Total		385
cytoplasmic membrane-bounded vesicle	F45D3.5	1
	R13A5.1	1
	Y48G10A.1	1
cytoplasmic membrane-bounded vesicle Total		3
cytoplasmic mRNA processing body	C07H6.5	1
	F48F7.1	1
	F52G2.1	1
	Y18D10A.17	1
	Y55F3AM.12	1
cytoplasmic mRNA processing body Total		5
cytoplasmic part	Y18D10A.17	1
cytoplasmic part Total		1
cytoplasmic vesicle	C02C6.1	1
	C09G12.8	1
	C42D8.8	1
	F01D4.4	1
	R07B1.10	1
	R10E12.1	1
	T19E7.3	1
	T20G5.1	1
cytoplasmic vesicle Total		8
cytoskeleton	C06A5.7	1
	C08D8.2	1
	C24B5.2	1
	C34B4.1	1
	C35D10.16	1
	C46H11.3	1
	C56G7.3	1
	F46C3.3	1
	M01B12.3	1
	M03F4.2	1
	T04C12.6	1
	T10H10.1	1
	Y106G6E.5	1
	Y37D8A.1	1
	Y6D11A.2	1
	Y79H2A.6	1
	Y92H12BL.4	1
cytoskeleton Total		17
cytosol	C10F3.5	1
	C15F1.7	1
	C38D4.8	1
	F10G7.2	1
	F21C3.5	1
	M110.4	1
	T05G5.10	1
	T23G11.3	1
	W08G11.4	1
	Y110A7A.5	1
	Y56A3A.32	1
	ZK1098.8	1
	ZK455.1	1
	ZK652.11	1
cytosol Total		14
cytosolic small ribosomal subunit	Y105E8A.16	1
cytosolic small ribosomal subunit Total		1
dendrite	B0336.6	1
	C01G6.8	1
	C02F4.2	1
	C06E1.4	1
	C38D4.8	1
	C52E12.2	1
	F15A2.6	1
	F38A6.2	1
	F46F6.4	1
	F54B11.6	1
	F56A8.7	1
	M04C9.5	1
	R11G1.4	1
	T07A9.6	1
	W09C5.5	1
	Y38F2AL.2	1
	Y55B1BM.1	1
	Y73F8A.1	1
dendrite Total		18
dense core granule	B0244.2	1
dense core granule Total		1
desmosome	M6.1	1
desmosome Total		1
DNA polymerase III complex	F44B9.8	1
DNA polymerase III complex Total		1
DNA replication factor C complex	C54G10.2	1
	F44B9.8	1
	F58F6.4	1
DNA replication factor C complex Total		3
DNA-dependent protein kinase-DNA ligase 4 complex	Y47D3A.4	1
DNA-dependent protein kinase-DNA ligase 4 complex Total		1
DNA-directed RNA polymerase II, core complex	F36A4.7	1
DNA-directed RNA polymerase II, core complex Total		1
dosage compensation complex	M106.1	1
	R13G10.1	1
	Y39A1B.3	1
dosage compensation complex Total		3
dynactin complex	C28H8.12	1
	ZK593.5	1
dynactin complex Total		2
dynein complex	T21E12.4	1
dynein complex Total		1
dystrophin-associated glycoprotein complex	F30A10.8	1
dystrophin-associated glycoprotein complex Total		1
early endosome	C07G1.5	1
	C34G6.7	1
	T10G3.5	1
early endosome Total		3
Elongator holoenzyme complex	C26B2.6	1
Elongator holoenzyme complex Total		1
endocytic vesicle	F21G4.2	1
	F29D11.1	1
	T10G3.5	1
	T20B5.1	1
	Y116A8C.36	1
endocytic vesicle Total		5
endomembrane system	F02A9.6	1
	W06H8.1	1
endomembrane system Total		2
endoplasmic reticulum	BE10.2	1
	C07A12.4	1
	C14B1.1	1
	C14B9.2	1
	C18E9.11	1
	C25A1.5	1
	C34B2.10	1
	D1014.3	1
	F25D7.1	1
	F33D4.2	1
	F35C8.5	1
	F35G2.4	1
	F43E2.8	1
	F46C3.1	1
	F49E12.10	1
	F49E12.9	1
	F52H3.1	1
	H06O01.1	1
	H37A05.1	1
	K08F4.3	1
	K09E4.2	1
	K11D9.2	1
	T04G9.5	1
	T22D1.4	1
	W06A7.3	1
	W08F4.3	1
	Y18D10A.17	1
	Y37A1B.12	1
	Y37A1B.13	1
	Y38A10A.5	1
	Y47D3B.10	1
	Y54G2A.18	1
	Y56A3A.21	1
	Y59A8B.25	1
	Y59A8B.8	1
	Y71F9AM.4	1
	ZK632.6	1
endoplasmic reticulum Total		37
endoplasmic reticulum lumen	C14B9.2	1
	C15H9.6	1
endoplasmic reticulum lumen Total		2
endoplasmic reticulum membrane	B0491.1	1
	C06E1.3	1
	C08B11.8	1
	C08H9.3	1
	C09G4.1	1
	C16C10.5	1
	F10D2.9	1
	M01A10.3	1
	M110.7	1
	T09A5.11	1
	T09B4.1	1
	T22C1.3	1
	Y105E8B.8	1
	Y110A2AL.12	1
	Y54E10BR.1	1
	ZK370.4	1
endoplasmic reticulum membrane Total		16
endosome	F25D7.1	1
	F26H9.6	1
	F53F10.4	1
	Y49E10.11	1
endosome Total		4
endosome membrane	C07G1.5	1
	F18C12.2	1
endosome membrane Total		2
endospore-forming forespore	C09G5.6	1
endospore-forming forespore Total		1
eukaryotic translation elongation factor 1 complex	F17C11.9	1
	F54H12.6	1
	Y41E3.10	1
eukaryotic translation elongation factor 1 complex Total		3
eukaryotic translation initiation factor 2 complex	Y37E3.10	1
eukaryotic translation initiation factor 2 complex Total		1
eukaryotic translation initiation factor 3 complex	R08D7.3	1
	T16G1.11	1
	T23D8.4	1
eukaryotic translation initiation factor 3 complex Total		3
eukaryotic translation initiation factor 4F complex	M110.4	1
eukaryotic translation initiation factor 4F complex Total		1
exocyst	C28G1.3	1
	C43E11.8	1
	Y106G6H.7	1
exocyst Total		3
exosome (RNase complex)	C14A4.4	1
	C14A4.5	1
exosome (RNase complex) Total		2
external encapsulating structure	F59E12.12	1
external encapsulating structure Total		1
extracellular matrix	C04A11.4	1
	C31B8.8	1
	C36B1.1	1
	C37C3.6	1
	C54D1.5	1
	EGAP1.3	1
	F25H8.3	1
	F32B5.8	1
	F46C8.6	1
	H36L18.1	1
	K07D8.1	1
	K08C7.3	1
	T21D11.1	1
	T22A3.8	1
	Y57G11C.24	1
	ZC101.2	1
extracellular matrix Total		16
extracellular matrix part	F30B5.1	1
extracellular matrix part Total		1
extracellular region	B0024.14	1
	B0252.2	1
	B0545.3	1
	C04F6.3	1
	C04G6.10	1
	C04G6.7	1
	C05D11.4	1
	C06A8.6	1
	C07A4.3	1
	C27A2.5	1
	C39E9.2	1
	C39E9.4	1
	C39E9.5	1
	C39E9.6	1
	C53D6.2	1
	F02E11.5	1
	F07F6.7	1
	F09B9.5	1
	F09E8.5	1
	F11C7.3	1
	F38E1.7	1
	F40E10.4	1
	F43G9.10	1
	F48E8.1	1
	F49E11.10	1
	F49E11.11	1
	F49E11.4	1
	F49E11.5	1
	F49E11.6	1
	F49E11.9	1
	F56H11.1	1
	F57B7.2	1
	F58H1.4	1
	H10D18.2	1
	H10D18.4	1
	K03D10.1	1
	K07A12.1	1
	K10B4.6	1
	M03E7.4	1
	R12A1.3	1
	T01B7.8	1
	T05A10.5	1
	T12A7.3	1
	W01B6.1	1
	W08D2.1	1
	W09B12.1	1
	Y43F8B.5	1
	Y51H7C.2	1
	ZK337.1	1
	ZK384.1	1
	ZK384.2	1
	ZK455.4	1
	ZK669.4	1
extracellular region Total		53
extracellular space	B0034.3	1
	C44H4.3	1
	F40E10.4	1
	F58H1.4	1
	T15B7.1	1
	ZK337.1	1
extracellular space Total		6
extrinsic to internal side of plasma membrane	M01D7.7	1
	M110.5	1
extrinsic to internal side of plasma membrane Total		2
extrinsic to membrane	C01G8.5	1
	F42A10.2	1
	H05G16.1	1
	T04C9.6	1
	ZK270.2	1
extrinsic to membrane Total		5
F-actin capping protein complex	D2024.6	1
	M106.5	1
F-actin capping protein complex Total		2
fatty acid beta-oxidation multienzyme complex	C29F3.1	1
	T08B2.7	1
fatty acid beta-oxidation multienzyme complex Total		2
filamentous actin	C01G8.5	1
	F10E9.6	1
filamentous actin Total		2
filopodium	M04F3.5	1
filopodium Total		1
filopodium tip	Y50D4C.1	1
filopodium tip Total		1
focal adhesion	C30F8.4	1
	F42G4.3	1
	Y71G12B.11	1
focal adhesion Total		3
gamma DNA polymerase complex	Y57A10A.15	1
gamma DNA polymerase complex Total		1
germ cell nucleus	C53A5.3	1
	F33A8.1	1
	H12I13.4	1
	H26D21.1	1
	K04D7.5	1
	Y39A1B.3	1
	Y43C5A.6	1
germ cell nucleus Total		7
glycerol-3-phosphate dehydrogenase complex	F47G4.3	1
	K11H3.1	1
	T25G3.4	1
	Y50E8A.6	1
glycerol-3-phosphate dehydrogenase complex Total		4
glycine cleavage complex	D1025.2	1
	F52A8.5	1
glycine cleavage complex Total		2
Golgi apparatus	B0205.4	1
	C43G2.2	1
	D1014.3	1
	R11A5.1	1
	T27C10.6	1
	W09G10.4	1
	Y105E8A.9	1
	Y110A2AL.14	1
	Y49E10.11	1
	Y59A8B.25	1
	Y59A8B.8	1
	Y71F9AM.4	1
	ZK256.1	1
Golgi apparatus Total		13
Golgi apparatus part	Y105E8A.9	1
Golgi apparatus part Total		1
Golgi cisterna membrane	C10F3.6	1
	PAR2.4	1
	T24D1.1	1
Golgi cisterna membrane Total		3
Golgi membrane	B0416.6	1
	C03H5.2	1
	C16C10.5	1
	C29H12.2	1
	F15B10.1	1
	F48E3.1	1
	K08F8.3	1
	K09B11.9	1
	M01F1.1	1
	M02B1.1	1
	T03F1.12	1
	ZK370.7	1
	ZK896.9	1
Golgi membrane Total		13
Golgi stack	C03E10.4	1
	C55B7.2	1
Golgi stack Total		2
Golgi trans cisterna	C09H6.2	1
Golgi trans cisterna Total		1
Golgi-associated vesicle	M110.5	1
Golgi-associated vesicle Total		1
GPI-anchor transamidase complex	F17C11.7	1
	F33D11.9	1
GPI-anchor transamidase complex Total		2
hemidesmosome	K07D8.1	1
	K08E5.3	1
hemidesmosome Total		2
heterotrimeric G-protein complex	C16C2.2	1
	F08B6.2	1
	F13D12.7	1
	F28C1.2	1
	K02A4.2	1
	M01D7.7	1
	Y95B8A.5	1
heterotrimeric G-protein complex Total		7
histone acetyltransferase complex	C47D12.1	1
histone acetyltransferase complex Total		1
histone deacetylase complex	C10E2.3	1
	C53A5.3	1
	R06C1.1	1
	T14G8.1	1
histone deacetylase complex Total		4
I band	K11C4.3	1
	K11C4.5	1
	T03G6.3	1
I band Total		3
inhibitory synapse	Y37D8A.23	1
inhibitory synapse Total		1
insoluble fraction	C09B8.7	1
	C09G12.8	1
	E01H11.1	1
	F09E5.1	1
	R07G3.1	1
	W09B12.1	1
insoluble fraction Total		6
integral to endoplasmic reticulum membrane	K09A9.6	1
	Y38F2AR.2	1
	Y48G8AL.11	1
integral to endoplasmic reticulum membrane Total		3
integral to endosome membrane	C18D11.2	1
integral to endosome membrane Total		1
integral to Golgi membrane	C18D11.2	1
	R07E4.4	1
	T07A5.2	1
	Y54F10AM.4	1
integral to Golgi membrane Total		4
integral to membrane	AC3.5	1
	AC3.6	1
	AC3.7	1
	AC3.8	1
	AH6.2	1
	B0024.1	1
	B0024.13	1
	B0024.14	1
	B0024.15	1
	B0024.2	1
	B0034.3	1
	B0035.2	1
	B0041.5	1
	B0205.4	1
	B0207.12	1
	B0212.1	1
	B0212.5	1
	B0213.11	1
	B0213.12	1
	B0213.14	1
	B0213.15	1
	B0218.1	1
	B0218.2	1
	B0222.2	1
	B0222.3	1
	B0222.6	1
	B0222.7	1
	B0222.8	1
	B0240.1	1
	B0240.2	1
	B0240.4	1
	B0244.2	1
	B0250.9	1
	B0272.2	1
	B0273.4	1
	B0280.12	1
	B0285.5	1
	B0285.6	1
	B0286.2	1
	B0303.11	1
	B0303.4	1
	B0304.3	1
	B0331.1	1
	B0331.2	1
	B0334.5	1
	B0334.6	1
	B0336.11	1
	B0348.4	1
	B0361.10	1
	B0361.7	1
	B0361.8	1
	B0365.3	1
	B0393.5	1
	B0395.1	1
	B0395.2	1
	B0399.1	1
	B0410.2	1
	B0416.1	1
	B0416.5	1
	B0416.6	1
	B0454.6	1
	B0457.1	1
	B0464.6	1
	B0491.1	1
	B0491.2	1
	B0491.8	1
	B0495.4	1
	B0495.7	1
	B0511.12	1
	B0511.13	1
	B0513.9	1
	B0554.5	1
	B0554.7	1
	B0563.2	1
	B0563.4	1
	B0564.3	1
	B0564.4	1
	BE0003N10.3	1
	BE10.2	1
	C01A2.3	1
	C01B10.9	1
	C01B12.1	1
	C01B12.3	1
	C01B12.4	1
	C01B12.5	1
	C01B4.9	1
	C01C10.3	1
	C01F1.2	1
	C01G12.8	1
	C01G6.1	1
	C01G6.8	1
	C01G8.2	1
	C01G8.4	1
	C01H6.1	1
	C01H6.6	1
	C02C2.5	1
	C02C6.3	1
	C02D4.2	1
	C02D5.2	1
	C02E11.1	1
	C02E7.1	1
	C02F5.13	1
	C02F5.3	1
	C02H6.1	1
	C03A3.2	1
	C03C10.3	1
	C03E10.4	1
	C03F11.1	1
	C03F11.3	1
	C03H12.1	1
	C03H5.2	1
	C04A11.4	1
	C04A2.7	1
	C04C3.2	1
	C04F12.10	1
	C04F5.1	1
	C05A9.1	1
	C05C12.3	1
	C05D10.3	1
	C05D11.6	1
	C05D11.7	1
	C05D12.1	1
	C05D2.1	1
	C05D9.2	1
	C05E11.1	1
	C05G5.1	1
	C06A8.9	1
	C06B3.4	1
	C06B3.5	1
	C06E1.3	1
	C06E1.4	1
	C06E7.1	1
	C06G4.2	1
	C06G4.5	1
	C06G8.1	1
	C06G8.2	1
	C06G8.3	1
	C06H2.4	1
	C07A4.1	1
	C07A9.11	1
	C07A9.4	1
	C07A9.8	1
	C07F11.1	1
	C07H4.2	1
	C08B11.8	1
	C08B6.1	1
	C08D8.1	1
	C08F11.8	1
	C08F8.4	1
	C08F8.7	1
	C08G5.4	1
	C08H9.3	1
	C08H9.5	1
	C09B7.1	1
	C09B9.3	1
	C09D4.1	1
	C09D8.1	1
	C09F5.2	1
	C09G4.1	1
	C09G5.1	1
	C09G5.3	1
	C09G5.4	1
	C09G5.5	1
	C09G5.6	1
	C09H5.2	1
	C10C5.1	1
	C10C6.2	1
	C10C6.5	1
	C10C6.6	1
	C10E2.6	1
	C10F3.2	1
	C10F3.3	1
	C10F3.6	1
	C10G8.5	1
	C10H11.3	1
	C10H11.4	1
	C10H11.5	1
	C10H11.6	1
	C11D2.6	1
	C11H1.2	1
	C12D12.2	1
	C12D8.8	1
	C13B4.1	1
	C13B9.4	1
	C13C4.5	1
	C13D9.7	1
	C13D9.8	1
	C13D9.9	1
	C13F10.5	1
	C14A4.3	1
	C14C10.1	1
	C14C11.3	1
	C14F5.1	1
	C14F5.4	1
	C14H10.1	1
	C15A11.1	1
	C15A11.5	1
	C15A11.6	1
	C15A7.2	1
	C15B12.7	1
	C15C7.1	1
	C15F1.3	1
	C15F1.6	1
	C15H11.4	1
	C15H9.1	1
	C15H9.4	1
	C15H9.5	1
	C16B8.1	1
	C16C10.1	1
	C16C10.12	1
	C16C10.5	1
	C16C10.7	1
	C16D6.2	1
	C16D9.2	1
	C16D9.6	1
	C17A2.3	1
	C17C3.1	1
	C17D12.6	1
	C17E4.3	1
	C17E4.9	1
	C17G1.3	1
	C17G1.8	1
	C17H11.6	1
	C17H12.2	1
	C18A3.4	1
	C18B12.2	1
	C18B12.4	1
	C18B12.6	1
	C18B2.6	1
	C18C4.2	1
	C18C4.3	1
	C18D1.4	1
	C18D11.2	1
	C18E3.8	1
	C18E9.10	1
	C18E9.11	1
	C18E9.2	1
	C18F3.2	1
	C18G1.3	1
	C18H7.1	1
	C18H7.3	1
	C23G10.6	1
	C23H3.9	1
	C23H4.1	1
	C23H5.7	1
	C24A11.8	1
	C24A3.6	1
	C24A8.1	1
	C24A8.6	1
	C24B5.3	1
	C24F3.1	1
	C24F3.6	1
	C24G7.1	1
	C24G7.2	1
	C24G7.4	1
	C24H11.8	1
	C25A1.5	1
	C25A11.4	1
	C25B8.1	1
	C25B8.4	1
	C25E10.2	1
	C25E10.3	1
	C25E10.4	1
	C25E10.5	1
	C25F6.4	1
	C25F6.7	1
	C25G6.2	1
	C25G6.5	1
	C25H3.9	1
	C26E6.12	1
	C26F1.2	1
	C26F1.7	1
	C26G2.1	1
	C26H9A.1	1
	C27A12.9	1
	C27A7.1	1
	C27A7.3	1
	C27B7.4	1
	C27C12.4	1
	C27C12.7	1
	C27F2.2	1
	C27F2.8	1
	C27H5.4	1
	C27H5.8	1
	C28H8.4	1
	C29A12.4	1
	C29E4.1	1
	C29E6.2	1
	C29F4.1	1
	C29F4.2	1
	C29H12.2	1
	C30A5.7	1
	C30B5.2	1
	C30D11.1	1
	C30F12.6	1
	C30H6.2	1
	C30H6.6	1
	C31E10.6	1
	C31E10.7	1
	C31E10.8	1
	C31H5.3	1
	C32A3.3	1
	C32C4.1	1
	C32C4.2	1
	C32C4.7	1
	C32D5.2	1
	C32E8.8	1
	C33A11.2	1
	C33A12.6	1
	C33D12.2	1
	C33F10.5	1
	C33H5.14	1
	C33H5.18	1
	C33H5.19	1
	C34B2.10	1
	C34B2.8	1
	C34B7.3	1
	C34C12.4	1
	C34D10.1	1
	C34D4.15	1
	C34D4.4	1
	C34D4.9	1
	C34E10.4	1
	C34F6.10	1
	C34F6.2	1
	C34F6.3	1
	C34F6.4	1
	C34F6.7	1
	C34G6.4	1
	C34H3.1	1
	C34H4.4	1
	C35A11.4	1
	C35A5.1	1
	C35A5.2	1
	C35B8.1	1
	C35C5.10	1
	C35C5.11	1
	C35C5.2	1
	C35D10.1	1
	C35D10.10	1
	C35D10.14	1
	C35D10.15	1
	C36A4.1	1
	C36A4.2	1
	C36A4.3	1
	C36A4.5	1
	C36A4.6	1
	C36B1.12	1
	C36B7.6	1
	C36E8.3	1
	C37A5.1	1
	C37C3.12	1
	C37C3.7	1
	C37E2.2	1
	C37E2.3	1
	C38C10.1	1
	C38C10.2	1
	C38C6.2	1
	C38H2.2	1
	C39B10.2	1
	C39E6.6	1
	C39E9.10	1
	C39E9.3	1
	C39E9.9	1
	C40C9.1	1
	C40C9.2	1
	C40C9.5	1
	C40H1.4	1
	C41C4.10	1
	C41C4.4	1
	C41C4.5	1
	C41C4.7	1
	C41D11.9	1
	C41D7.2	1
	C41G7.9	1
	C42C1.10	1
	C42C1.16	1
	C42C1.8	1
	C42D8.8	1
	C43C3.2	1
	C43G2.1	1
	C43G2.2	1
	C43G2.4	1
	C43H6.7	1
	C43H6.9	1
	C44B7.11	1
	C44B7.4	1
	C44B7.7	1
	C44B7.8	1
	C44B7.9	1
	C44C1.5	1
	C44C10.1	1
	C44E12.3	1
	C44F1.5	1
	C44H4.1	1
	C44H4.2	1
	C44H9.1	1
	C45B11.6	1
	C45B2.4	1
	C45B2.7	1
	C45H4.2	1
	C46A5.3	1
	C46C11.2	1
	C46F11.1	1
	C46F4.2	1
	C46G7.1	1
	C47A10.1	1
	C47A4.2	1
	C47C12.6	1
	C47D12.3	1
	C47E12.2	1
	C47E12.4	1
	C47F8.4	1
	C47F8.5	1
	C47G2.3	1
	C47G2.4	1
	C48A7.1	1
	C48A7.2	1
	C48B4.2	1
	C48B4.4	1
	C48C5.1	1
	C48D1.3	1
	C48E7.5	1
	C48E7.6	1
	C49A1.2	1
	C49A1.3	1
	C49A9.7	1
	C49A9.8	1
	C49C8.4	1
	C49F8.2	1
	C50B6.4	1
	C50D2.2	1
	C50D2.4	1
	C50D2.9	1
	C50E3.16	1
	C50F4.14	1
	C50H11.15	1
	C50H2.1	1
	C51E3.6	1
	C52A11.4	1
	C52B11.3	1
	C52B9.4	1
	C52B9.6	1
	C52D10.12	1
	C52D10.13	1
	C52E12.3	1
	C52E4.5	1
	C53A5.13	1
	C53A5.2	1
	C53A5.5	1
	C53B4.3	1
	C53B4.4	1
	C53B4.5	1
	C53B4.6	1
	C53C11.3	1
	C53C7.1	1
	C53C9.3	1
	C53D5.1	1
	C53D5.2	1
	C53D5.5	1
	C53H9.2	1
	C54A12.1	1
	C54C8.11	1
	C54C8.2	1
	C54C8.5	1
	C54D1.1	1
	C54D10.1	1
	C54D10.2	1
	C54D2.5	1
	C54F6.13	1
	C54F6.4	1
	C54G10.3	1
	C54G4.4	1
	C54G4.8	1
	C54G7.2	1
	C54H2.5	1
	C55B7.2	1
	C55C3.1	1
	C56C10.13	1
	C56E6.5	1
	C56G2.1	1
	C56G2.6	1
	cTel55X.1	1
	D1005.3	1
	D1007.15	1
	D1007.5	1
	D1009.1	1
	D1009.3	1
	D1022.1	1
	D1037.2	1
	D1044.3	1
	D1046.3	1
	D1046.5	1
	D1065.1	1
	D1073.1	1
	D2013.10	1
	D2013.8	1
	D2021.2	1
	D2023.1	1
	D2023.7	1
	D2024.3	1
	D2030.1	1
	D2085.6	1
	D2089.2	1
	D2092.1	1
	D2092.3	1
	D2092.4	1
	D2092.5	1
	D2096.2	1
	D2096.4	1
	DC2.3	1
	DH11.3	1
	DY3.7	1
	E01A2.10	1
	E01A2.7	1
	E01H11.1	1
	E02A10.2	1
	E02D9.1	1
	E02H4.1	1
	E03G2.2	1
	E03H4.10	1
	E03H4.12	1
	E04A4.5	1
	E04A4.6	1
	E04F6.11	1
	EGAP2.3	1
	EGAP7.1	1
	F01D4.1	1
	F01D4.2	1
	F01D4.4	1
	F01D4.9	1
	F01D5.9	1
	F01E11.5	1
	F01G12.1	1
	F01G4.5	1
	F01G4.6	1
	F02A9.6	1
	F02C12.5	1
	F02C9.3	1
	F02D10.5	1
	F02E11.1	1
	F02E8.2	1
	F02E8.5	1
	F02E8.6	1
	F02E9.7	1
	F02G3.1	1
	F07A5.3	1
	F07B10.1	1
	F07B10.5	1
	F07C3.1	1
	F07C3.7	1
	F07F6.6	1
	F07F6.7	1
	F07H5.2	1
	F08A10.1	1
	F08B1.2	1
	F08B12.1	1
	F08B12.2	1
	F08B12.3	1
	F08B4.2	1
	F08C6.4	1
	F08C6.6	1
	F08F1.5	1
	F08F1.7	1
	F08F3.3	1
	F08F3.7	1
	F08F8.2	1
	F08F8.8	1
	F08G5.2	1
	F08G5.4	1
	F09A5.1	1
	F09A5.4	1
	F09B12.2	1
	F09B12.3	1
	F09B9.3	1
	F09C8.1	1
	F09E5.11	1
	F09E5.4	1
	F09E8.2	1
	F09E8.7	1
	F09G2.3	1
	F09G2.5	1
	F09G2.6	1
	F09G2.8	1
	F09G8.4	1
	F09G8.5	1
	F09G8.6	1
	F10B5.9	1
	F10C5.2	1
	F10D2.11	1
	F10D2.2	1
	F10D2.5	1
	F10D2.6	1
	F10D2.7	1
	F10D2.9	1
	F10D7.2	1
	F10E7.2	1
	F10E7.3	1
	F10E7.9	1
	F10G7.5	1
	F11A10.5	1
	F11A10.6	1
	F11A5.10	1
	F11A5.12	1
	F11C1.3	1
	F11C3.2	1
	F11C7.1	1
	F11C7.4	1
	F11D5.3	1
	F11E6.5	1
	F11E6.8	1
	F11G11.12	1
	F11G11.9	1
	F11H8.2	1
	F12B6.1	1
[truncated: 4,886 more rows]

## Sheet: C) genes with cc annot (4131)
Gene ID	GO ID	GO Ontology	GO Term
2RSSE.1	GO:0005622	cellular_component	intracellular
4R79.2	GO:0005622	cellular_component	intracellular
4R79.2	GO:0005634	cellular_component	nucleus
4R79.2	GO:0005737	cellular_component	cytoplasm
AC3.5	GO:0016021	cellular_component	integral to membrane
AC3.6	GO:0016021	cellular_component	integral to membrane
AC3.7	GO:0016021	cellular_component	integral to membrane
AC3.8	GO:0016021	cellular_component	integral to membrane
AH6.2	GO:0016020	cellular_component	membrane
AH6.2	GO:0016021	cellular_component	integral to membrane
B0024.1	GO:0016021	cellular_component	integral to membrane
B0024.13	GO:0016021	cellular_component	integral to membrane
B0024.14	GO:0005576	cellular_component	extracellular region
B0024.14	GO:0016021	cellular_component	integral to membrane
B0024.15	GO:0016020	cellular_component	membrane
B0024.15	GO:0016021	cellular_component	integral to membrane
B0024.2	GO:0016021	cellular_component	integral to membrane
B0025.1	GO:0005640	cellular_component	nuclear outer membrane
B0025.1	GO:0005737	cellular_component	cytoplasm
B0025.1	GO:0005942	cellular_component	phosphoinositide 3-kinase complex
B0034.3	GO:0005615	cellular_component	extracellular space
B0034.3	GO:0016020	cellular_component	membrane
B0034.3	GO:0016021	cellular_component	integral to membrane
B0034.3	GO:0032809	cellular_component	cell soma membrane
B0034.3	GO:0043231	cellular_component	intracellular membrane-bounded organelle
B0035.1	GO:0005622	cellular_component	intracellular
B0035.10	GO:0000786	cellular_component	nucleosome
B0035.12	GO:0005622	cellular_component	intracellular
B0035.16	GO:0005737	cellular_component	cytoplasm
B0035.2	GO:0016021	cellular_component	integral to membrane
B0035.4	GO:0016272	cellular_component	prefoldin complex
B0035.7	GO:0000786	cellular_component	nucleosome
B0035.7	GO:0005622	cellular_component	intracellular
B0035.7	GO:0005634	cellular_component	nucleus
B0035.8	GO:0000786	cellular_component	nucleosome
B0035.8	GO:0005622	cellular_component	intracellular
B0035.8	GO:0005634	cellular_component	nucleus
B0035.9	GO:0000786	cellular_component	nucleosome
B0035.9	GO:0005622	cellular_component	intracellular
B0035.9	GO:0005634	cellular_component	nucleus
B0041.4	GO:0005622	cellular_component	intracellular
B0041.4	GO:0005840	cellular_component	ribosome
B0041.5	GO:0016021	cellular_component	integral to membrane
B0205.11	GO:0005622	cellular_component	intracellular
B0205.11	GO:0005840	cellular_component	ribosome
B0205.4	GO:0005794	cellular_component	Golgi apparatus
B0205.4	GO:0016020	cellular_component	membrane
B0205.4	GO:0016021	cellular_component	integral to membrane
B0207.12	GO:0016020	cellular_component	membrane
B0207.12	GO:0016021	cellular_component	integral to membrane
B0207.12	GO:0045211	cellular_component	postsynaptic membrane
B0207.4	GO:0000793	cellular_component	condensed chromosome
B0207.4	GO:0000794	cellular_component	condensed nuclear chromosome
B0207.4	GO:0005819	cellular_component	spindle
B0207.4	GO:0051233	cellular_component	spindle midzone
B0212.1	GO:0016021	cellular_component	integral to membrane
B0212.5	GO:0016020	cellular_component	membrane
B0212.5	GO:0016021	cellular_component	integral to membrane
B0212.5	GO:0031513	cellular_component	nonmotile primary cilium
B0212.5	GO:0043025	cellular_component	cell soma
B0213.11	GO:0016021	cellular_component	integral to membrane
B0213.12	GO:0016021	cellular_component	integral to membrane
B0213.14	GO:0016021	cellular_component	integral to membrane
B0213.15	GO:0016021	cellular_component	integral to membrane
B0218.1	GO:0016021	cellular_component	integral to membrane
B0218.2	GO:0016021	cellular_component	integral to membrane
B0222.2	GO:0016020	cellular_component	membrane
B0222.2	GO:0016021	cellular_component	integral to membrane
B0222.3	GO:0016020	cellular_component	membrane
B0222.3	GO:0016021	cellular_component	integral to membrane
B0222.6	GO:0016021	cellular_component	integral to membrane
B0222.7	GO:0016021	cellular_component	integral to membrane
B0222.8	GO:0016021	cellular_component	integral to membrane
B0228.5	GO:0005634	cellular_component	nucleus
B0228.5	GO:0005737	cellular_component	cytoplasm
B0228.5	GO:0043025	cellular_component	cell soma
B0240.1	GO:0016020	cellular_component	membrane
B0240.1	GO:0016021	cellular_component	integral to membrane
B0240.2	GO:0016021	cellular_component	integral to membrane
B0240.4	GO:0016021	cellular_component	integral to membrane
B0244.2	GO:0016021	cellular_component	integral to membrane
B0244.2	GO:0030140	cellular_component	trans-Golgi network transport vesicle
B0244.2	GO:0031045	cellular_component	dense core granule
B0244.2	GO:0045202	cellular_component	synapse
B0250.1	GO:0005622	cellular_component	intracellular
B0250.1	GO:0005840	cellular_component	ribosome
B0250.9	GO:0016021	cellular_component	integral to membrane
B0252.2	GO:0005576	cellular_component	extracellular region
B0261.2	GO:0005737	cellular_component	cytoplasm
B0261.4	GO:0005761	cellular_component	mitochondrial ribosome
B0272.1	GO:0005874	cellular_component	microtubule
B0272.1	GO:0043234	cellular_component	protein complex
B0272.2	GO:0016021	cellular_component	integral to membrane
B0273.4	GO:0005887	cellular_component	integral to plasma membrane
B0273.4	GO:0016021	cellular_component	integral to membrane
B0280.12	GO:0016020	cellular_component	membrane
B0280.12	GO:0016021	cellular_component	integral to membrane
B0280.12	GO:0030288	cellular_component	outer membrane-bounded periplasmic space
B0281.3	GO:0005622	cellular_component	intracellular
B0281.5	GO:0008076	cellular_component	voltage-gated potassium channel complex
B0281.5	GO:0016020	cellular_component	membrane
B0281.6	GO:0008076	cellular_component	voltage-gated potassium channel complex
B0281.6	GO:0016020	cellular_component	membrane
B0281.8	GO:0005622	cellular_component	intracellular
B0285.5	GO:0016021	cellular_component	integral to membrane
B0285.6	GO:0016020	cellular_component	membrane
B0285.6	GO:0016021	cellular_component	integral to membrane
B0286.2	GO:0016020	cellular_component	membrane
B0286.2	GO:0016021	cellular_component	integral to membrane
B0286.4	GO:0005634	cellular_component	nucleus
B0286.5	GO:0005634	cellular_component	nucleus
B0303.11	GO:0016020	cellular_component	membrane
B0303.11	GO:0016021	cellular_component	integral to membrane
B0303.15	GO:0005840	cellular_component	ribosome
B0303.4	GO:0016021	cellular_component	integral to membrane
B0304.1	GO:0005634	cellular_component	nucleus
B0304.3	GO:0016021	cellular_component	integral to membrane
B0331.1	GO:0016021	cellular_component	integral to membrane
B0331.2	GO:0016020	cellular_component	membrane
B0331.2	GO:0016021	cellular_component	integral to membrane
B0334.5	GO:0016021	cellular_component	integral to membrane
B0334.6	GO:0016021	cellular_component	integral to membrane
B0334.8	GO:0005942	cellular_component	phosphoinositide 3-kinase complex
B0336.10	GO:0005622	cellular_component	intracellular
B0336.10	GO:0005840	cellular_component	ribosome
B0336.11	GO:0016021	cellular_component	integral to membrane
B0336.13	GO:0005672	cellular_component	transcription factor TFIIA complex
B0336.2	GO:0005622	cellular_component	intracellular
B0336.2	GO:0005634	cellular_component	nucleus
B0336.2	GO:0005737	cellular_component	cytoplasm
B0336.6	GO:0005737	cellular_component	cytoplasm
B0336.6	GO:0030424	cellular_component	axon
B0336.6	GO:0030425	cellular_component	dendrite
B0336.6	GO:0043025	cellular_component	cell soma
B0336.8	GO:0005737	cellular_component	cytoplasm
B0348.4	GO:0016021	cellular_component	integral to membrane
B0348.6	GO:0005737	cellular_component	cytoplasm
B0350.2	GO:0016328	cellular_component	lateral plasma membrane
B0361.10	GO:0016021	cellular_component	integral to membrane
B0361.7	GO:0016021	cellular_component	integral to membrane
B0361.8	GO:0016021	cellular_component	integral to membrane
B0365.1	GO:0005737	cellular_component	cytoplasm
B0365.3	GO:0005886	cellular_component	plasma membrane
B0365.3	GO:0016020	cellular_component	membrane
B0365.3	GO:0016021	cellular_component	integral to membrane
B0393.1	GO:0005622	cellular_component	intracellular
B0393.1	GO:0005840	cellular_component	ribosome
B0393.1	GO:0015935	cellular_component	small ribosomal subunit
B0393.2	GO:0005622	cellular_component	intracellular
B0393.5	GO:0016021	cellular_component	integral to membrane
B0395.1	GO:0016021	cellular_component	integral to membrane
B0395.2	GO:0016021	cellular_component	integral to membrane
B0399.1	GO:0016021	cellular_component	integral to membrane
B0410.2	GO:0016021	cellular_component	integral to membrane
B0412.1	GO:0005634	cellular_component	nucleus
B0412.4	GO:0005622	cellular_component	intracellular
B0412.4	GO:0005840	cellular_component	ribosome
B0414.2	GO:0005634	cellular_component	nucleus
B0414.3	GO:0000786	cellular_component	nucleosome
B0414.3	GO:0005634	cellular_component	nucleus
B0414.6	GO:0043186	cellular_component	P granule
B0416.1	GO:0016021	cellular_component	integral to membrane
B0416.5	GO:0016021	cellular_component	integral to membrane
B0416.6	GO:0000139	cellular_component	Golgi membrane
B0416.6	GO:0016021	cellular_component	integral to membrane
B0432.4	GO:0016020	cellular_component	membrane
B0432.5	GO:0030424	cellular_component	axon
B0454.6	GO:0016020	cellular_component	membrane
B0454.6	GO:0016021	cellular_component	integral to membrane
B0457.1	GO:0005887	cellular_component	integral to plasma membrane
B0457.1	GO:0016020	cellular_component	membrane
B0457.1	GO:0016021	cellular_component	integral to membrane
B0464.1	GO:0005737	cellular_component	cytoplasm
B0464.6	GO:0016021	cellular_component	integral to membrane
B0464.7	GO:0000779	cellular_component	condensed chromosome, centromeric region
B0464.7	GO:0000793	cellular_component	condensed chromosome
B0464.7	GO:0005635	cellular_component	nuclear envelope
B0464.7	GO:0005654	cellular_component	nucleoplasm
B0464.7	GO:0005737	cellular_component	cytoplasm
B0478.1	GO:0005634	cellular_component	nucleus
B0478.1	GO:0005737	cellular_component	cytoplasm
B0478.1	GO:0016020	cellular_component	membrane
B0478.1	GO:0030424	cellular_component	axon
B0478.1	GO:0043025	cellular_component	cell soma
B0491.1	GO:0005789	cellular_component	endoplasmic reticulum membrane
B0491.1	GO:0016021	cellular_component	integral to membrane
B0491.2	GO:0016021	cellular_component	integral to membrane
B0491.8	GO:0016020	cellular_component	membrane
B0491.8	GO:0016021	cellular_component	integral to membrane
B0495.4	GO:0016021	cellular_component	integral to membrane
B0495.4	GO:0016324	cellular_component	apical plasma membrane
B0495.7	GO:0016021	cellular_component	integral to membrane
B0496.3	GO:0016020	cellular_component	membrane
B0511.12	GO:0016021	cellular_component	integral to membrane
B0511.13	GO:0016021	cellular_component	integral to membrane
B0513.3	GO:0005622	cellular_component	intracellular
B0513.3	GO:0005840	cellular_component	ribosome
B0513.9	GO:0016021	cellular_component	integral to membrane
B0523.5	GO:0005634	cellular_component	nucleus
B0545.3	GO:0005576	cellular_component	extracellular region
B0547.1	GO:0005634	cellular_component	nucleus
B0547.1	GO:0005737	cellular_component	cytoplasm
B0547.1	GO:0008180	cellular_component	signalosome
B0547.1	GO:0031672	cellular_component	A band
B0554.5	GO:0016021	cellular_component	integral to membrane
B0554.7	GO:0016021	cellular_component	integral to membrane
B0563.2	GO:0016021	cellular_component	integral to membrane
B0563.4	GO:0016021	cellular_component	integral to membrane
B0564.10	GO:0005634	cellular_component	nucleus
B0564.3	GO:0016021	cellular_component	integral to membrane
B0564.4	GO:0016021	cellular_component	integral to membrane
BE0003N10.1	GO:0005739	cellular_component	mitochondrion
BE0003N10.2	GO:0005622	cellular_component	intracellular
BE0003N10.3	GO:0016021	cellular_component	integral to membrane
BE10.2	GO:0005783	cellular_component	endoplasmic reticulum
BE10.2	GO:0016021	cellular_component	integral to membrane
C01A2.3	GO:0016021	cellular_component	integral to membrane
C01B10.9	GO:0016021	cellular_component	integral to membrane
C01B12.1	GO:0016021	cellular_component	integral to membrane
C01B12.2	GO:0005634	cellular_component	nucleus
C01B12.3	GO:0016021	cellular_component	integral to membrane
C01B12.4	GO:0016021	cellular_component	integral to membrane
C01B12.5	GO:0016021	cellular_component	integral to membrane
C01B4.9	GO:0016021	cellular_component	integral to membrane
C01B7.6	GO:0005622	cellular_component	intracellular
C01B7.6	GO:0030424	cellular_component	axon
C01B7.6	GO:0031594	cellular_component	neuromuscular junction
C01B7.6	GO:0045202	cellular_component	synapse
C01C10.3	GO:0016021	cellular_component	integral to membrane
C01F1.2	GO:0016021	cellular_component	integral to membrane
C01F4.2	GO:0005622	cellular_component	intracellular
C01F6.9	GO:0005622	cellular_component	intracellular
C01G10.11	GO:0030424	cellular_component	axon
C01G10.11	GO:0043025	cellular_component	cell soma
C01G10.7	GO:0009346	cellular_component	citrate lyase complex
C01G10.8	GO:0005737	cellular_component	cytoplasm
C01G12.8	GO:0016020	cellular_component	membrane
C01G12.8	GO:0016021	cellular_component	integral to membrane
C01G6.1	GO:0016020	cellular_component	membrane
C01G6.1	GO:0016021	cellular_component	integral to membrane
C01G6.8	GO:0005886	cellular_component	plasma membrane
C01G6.8	GO:0005887	cellular_component	integral to plasma membrane
C01G6.8	GO:0016021	cellular_component	integral to membrane
C01G6.8	GO:0030424	cellular_component	axon
C01G6.8	GO:0030425	cellular_component	dendrite
C01G6.8	GO:0031594	cellular_component	neuromuscular junction
C01G6.8	GO:0032809	cellular_component	cell soma membrane
C01G6.8	GO:0042995	cellular_component	cell projection
C01G6.8	GO:0043005	cellular_component	neuron projection
C01G8.2	GO:0016020	cellular_component	membrane
C01G8.2	GO:0016021	cellular_component	integral to membrane
C01G8.4	GO:0016021	cellular_component	integral to membrane
C01G8.5	GO:0005737	cellular_component	cytoplasm
C01G8.5	GO:0005938	cellular_component	cell cortex
C01G8.5	GO:0019898	cellular_component	extrinsic to membrane
C01G8.5	GO:0031941	cellular_component	filamentous actin
C01G8.5	GO:0031974	cellular_component	membrane-enclosed lumen
C01G8.9	GO:0005622	cellular_component	intracellular
C01H6.1	GO:0016021	cellular_component	integral to membrane
C01H6.5	GO:0005634	cellular_component	nucleus
C01H6.6	GO:0016021	cellular_component	integral to membrane
C02B8.4	GO:0005634	cellular_component	nucleus
C02C2.5	GO:0016021	cellular_component	integral to membrane
C02C6.1	GO:0001891	cellular_component	phagocytic cup
C02C6.1	GO:0005876	cellular_component	spindle microtubule
C02C6.1	GO:0030496	cellular_component	midbody
C02C6.1	GO:0031143	cellular_component	pseudopodium
C02C6.1	GO:0031410	cellular_component	cytoplasmic vesicle
C02C6.1	GO:0032154	cellular_component	cleavage furrow
C02C6.1	GO:0045202	cellular_component	synapse
C02C6.1	GO:0045335	cellular_component	phagocytic vesicle
C02C6.3	GO:0016021	cellular_component	integral to membrane
C02D4.2	GO:0005887	cellular_component	integral to plasma membrane
C02D4.2	GO:0016021	cellular_component	integral to membrane
C02D5.2	GO:0016021	cellular_component	integral to membrane
C02D5.3	GO:0005737	cellular_component	cytoplasm
C02E11.1	GO:0016021	cellular_component	integral to membrane
C02E7.1	GO:0016020	cellular_component	membrane
C02E7.1	GO:0016021	cellular_component	integral to membrane
C02F12.4	GO:0005622	cellular_component	intracellular
C02F4.1	GO:0005886	cellular_component	plasma membrane
C02F4.2	GO:0005634	cellular_component	nucleus
C02F4.2	GO:0005737	cellular_component	cytoplasm
C02F4.2	GO:0005929	cellular_component	cilium
C02F4.2	GO:0030424	cellular_component	axon
C02F4.2	GO:0030425	cellular_component	dendrite
C02F4.2	GO:0043025	cellular_component	cell soma
C02F5.13	GO:0016021	cellular_component	integral to membrane
C02F5.3	GO:0005622	cellular_component	intracellular
C02F5.3	GO:0016021	cellular_component	integral to membrane
C02F5.9	GO:0005839	cellular_component	proteasome core complex
C02H6.1	GO:0016020	cellular_component	membrane
C02H6.1	GO:0016021	cellular_component	integral to membrane
C02H7.1	GO:0005932	cellular_component	microtubule basal body
C02H7.1	GO:0030992	cellular_component	intraflagellar transport particle B
C02H7.1	GO:0035085	cellular_component	cilium axoneme
C02H7.3	GO:0005623	cellular_component	cell
C03A3.2	GO:0016021	cellular_component	integral to membrane
C03B8.4	GO:0005622	cellular_component	intracellular
C03C10.3	GO:0016021	cellular_component	integral to membrane
C03D6.3	GO:0005622	cellular_component	intracellular
C03D6.3	GO:0005634	cellular_component	nucleus
C03D6.5	GO:0005634	cellular_component	nucleus
C03D6.8	GO:0005622	cellular_component	intracellular
C03D6.8	GO:0005840	cellular_component	ribosome
C03E10.4	GO:0005795	cellular_component	Golgi stack
C03E10.4	GO:0016021	cellular_component	integral to membrane
C03F11.1	GO:0016021	cellular_component	integral to membrane
C03F11.3	GO:0016020	cellular_component	membrane
C03F11.3	GO:0016021	cellular_component	integral to membrane
C03H12.1	GO:0016021	cellular_component	integral to membrane
C03H5.2	GO:0000139	cellular_component	Golgi membrane
C03H5.2	GO:0016020	cellular_component	membrane
C03H5.2	GO:0016021	cellular_component	integral to membrane
C04A11.4	GO:0016021	cellular_component	integral to membrane
C04A11.4	GO:0031012	cellular_component	extracellular matrix
C04A2.1	GO:0005622	cellular_component	intracellular
C04A2.3	GO:0005634	cellular_component	nucleus
C04A2.3	GO:0016581	cellular_component	NuRD complex
C04A2.7	GO:0016021	cellular_component	integral to membrane
C04C3.2	GO:0016020	cellular_component	membrane
C04C3.2	GO:0016021	cellular_component	integral to membrane
C04C3.2	GO:0045211	cellular_component	postsynaptic membrane
C04D8.1	GO:0005622	cellular_component	intracellular
C04D8.1	GO:0030054	cellular_component	cell junction
C04F1.3	GO:0005634	cellular_component	nucleus
C04F12.10	GO:0016020	cellular_component	membrane
C04F12.10	GO:0016021	cellular_component	integral to membrane
C04F12.4	GO:0005622	cellular_component	intracellular
C04F12.4	GO:0005840	cellular_component	ribosome
C04F5.1	GO:0005886	cellular_component	plasma membrane
C04F5.1	GO:0005887	cellular_component	integral to plasma membrane
C04F5.1	GO:0016021	cellular_component	integral to membrane
C04F6.3	GO:0005576	cellular_component	extracellular region
C04F6.4	GO:0016528	cellular_component	sarcoplasm
C04F6.4	GO:0042643	cellular_component	actomyosin, actin part
C04G2.6	GO:0005634	cellular_component	nucleus
C04G2.7	GO:0005634	cellular_component	nucleus
C04G6.10	GO:0005576	cellular_component	extracellular region
C04G6.7	GO:0005576	cellular_component	extracellular region
C04H5.6	GO:0005622	cellular_component	intracellular
C05A9.1	GO:0016021	cellular_component	integral to membrane
C05B10.1	GO:0005886	cellular_component	plasma membrane
C05C10.3	GO:0005739	cellular_component	mitochondrion
C05C12.3	GO:0016020	cellular_component	membrane
C05C12.3	GO:0016021	cellular_component	integral to membrane
C05C8.5	GO:0005622	cellular_component	intracellular
C05C8.9	GO:0005814	cellular_component	centriole
C05C8.9	GO:0031513	cellular_component	nonmotile primary cilium
C05D10.3	GO:0016020	cellular_component	membrane
C05D10.3	GO:0016021	cellular_component	integral to membrane
C05D11.2	GO:0005737	cellular_component	cytoplasm
C05D11.4	GO:0005576	cellular_component	extracellular region
C05D11.4	GO:0005634	cellular_component	nucleus
C05D11.4	GO:0005685	cellular_component	snRNP U1
C05D11.4	GO:0005730	cellular_component	nucleolus
C05D11.4	GO:0005737	cellular_component	cytoplasm
C05D11.4	GO:0016607	cellular_component	nuclear speck
C05D11.6	GO:0016021	cellular_component	integral to membrane
C05D11.7	GO:0016021	cellular_component	integral to membrane
C05D12.1	GO:0016021	cellular_component	integral to membrane
C05D2.1	GO:0016020	cellular_component	membrane
C05D2.1	GO:0016021	cellular_component	integral to membrane
C05D9.2	GO:0016020	cellular_component	membrane
C05D9.2	GO:0016021	cellular_component	integral to membrane
C05D9.3	GO:0008305	cellular_component	integrin complex
C05D9.5	GO:0005737	cellular_component	cytoplasm
C05E11.1	GO:0005624	cellular_component	membrane fraction
C05E11.1	GO:0008021	cellular_component	synaptic vesicle
C05E11.1	GO:0016021	cellular_component	integral to membrane
C05E11.1	GO:0043005	cellular_component	neuron projection
C05E11.1	GO:0043025	cellular_component	cell soma
C05G5.1	GO:0016021	cellular_component	integral to membrane
C05H8.1	GO:0005634	cellular_component	nucleus
C05H8.1	GO:0005737	cellular_component	cytoplasm
C06A1.5	GO:0030880	cellular_component	RNA polymerase complex
C06A5.7	GO:0005856	cellular_component	cytoskeleton
C06A6.4	GO:0005737	cellular_component	cytoplasm
C06A8.6	GO:0005576	cellular_component	extracellular region
C06A8.9	GO:0016020	cellular_component	membrane
C06A8.9	GO:0016021	cellular_component	integral to membrane
C06A8.9	GO:0030288	cellular_component	outer membrane-bounded periplasmic space
C06B3.4	GO:0016021	cellular_component	integral to membrane
C06B3.5	GO:0016021	cellular_component	integral to membrane
C06B8.8	GO:0005622	cellular_component	intracellular
C06B8.8	GO:0005840	cellular_component	ribosome
C06C3.1	GO:0005737	cellular_component	cytoplasm
C06C3.1	GO:0005913	cellular_component	cell-cell adherens junction
C06C3.1	GO:0030077	cellular_component	plasma membrane light-harvesting complex
C06E1.3	GO:0005789	cellular_component	endoplasmic reticulum membrane
C06E1.3	GO:0016021	cellular_component	integral to membrane
C06E1.4	GO:0008328	cellular_component	ionotropic glutamate receptor complex
C06E1.4	GO:0016020	cellular_component	membrane
C06E1.4	GO:0016021	cellular_component	integral to membrane
C06E1.4	GO:0030288	cellular_component	outer membrane-bounded periplasmic space
C06E1.4	GO:0030425	cellular_component	dendrite
C06E1.4	GO:0043005	cellular_component	neuron projection
C06E1.4	GO:0043025	cellular_component	cell soma
C06E1.4	GO:0045211	cellular_component	postsynaptic membrane
C06E7.1	GO:0016021	cellular_component	integral to membrane
C06G3.10	GO:0016020	cellular_component	membrane
C06G3.2	GO:0000922	cellular_component	spindle pole
C06G3.2	GO:0005874	cellular_component	microtubule
C06G3.2	GO:0005938	cellular_component	cell cortex
C06G3.7	GO:0005737	cellular_component	cytoplasm
C06G4.2	GO:0005622	cellular_component	intracellular
C06G4.2	GO:0016021	cellular_component	integral to membrane
C06G4.5	GO:0016021	cellular_component	integral to membrane
C06G8.1	GO:0016020	cellular_component	membrane
C06G8.1	GO:0016021	cellular_component	integral to membrane
C06G8.2	GO:0016020	cellular_component	membrane
C06G8.2	GO:0016021	cellular_component	integral to membrane
C06G8.3	GO:0016020	cellular_component	membrane
C06G8.3	GO:0016021	cellular_component	integral to membrane
C06H2.4	GO:0016020	cellular_component	membrane
C06H2.4	GO:0016021	cellular_component	integral to membrane
C07A12.3	GO:0005634	cellular_component	nucleus
C07A12.4	GO:0005783	cellular_component	endoplasmic reticulum
C07A12.7	GO:0005622	cellular_component	intracellular
C07A4.1	GO:0016021	cellular_component	integral to membrane
C07A4.3	GO:0005576	cellular_component	extracellular region
C07A9.11	GO:0016021	cellular_component	integral to membrane
C07A9.2	GO:0005634	cellular_component	nucleus
C07A9.3	GO:0000790	cellular_component	nuclear chromatin
C07A9.3	GO:0005634	cellular_component	nucleus
C07A9.4	GO:0016021	cellular_component	integral to membrane
C07A9.8	GO:0016021	cellular_component	integral to membrane
C07B5.5	GO:0005622	cellular_component	intracellular
C07B5.5	GO:0005634	cellular_component	nucleus
C07E3.1	GO:0005622	cellular_component	intracellular
C07F11.1	GO:0005623	cellular_component	cell
C07F11.1	GO:0016021	cellular_component	integral to membrane
C07F11.1	GO:0030424	cellular_component	axon
C07F11.1	GO:0031224	cellular_component	intrinsic to membrane
C07G1.4	GO:0005938	cellular_component	cell cortex
C07G1.4	GO:0030864	cellular_component	cortical actin cytoskeleton
C07G1.4	GO:0031252	cellular_component	cell leading edge
C07G1.5	GO:0005769	cellular_component	early endosome
C07G1.5	GO:0010008	cellular_component	endosome membrane
C07G2.2	GO:0005634	cellular_component	nucleus
C07G2.3	GO:0005575	cellular_component	cellular_component
C07H4.2	GO:0016020	cellular_component	membrane
C07H4.2	GO:0016021	cellular_component	integral to membrane
C07H6.5	GO:0000932	cellular_component	cytoplasmic mRNA processing body
C07H6.5	GO:0005737	cellular_component	cytoplasm
C07H6.5	GO:0043186	cellular_component	P granule
C07H6.6	GO:0005737	cellular_component	cytoplasm
C07H6.7	GO:0005634	cellular_component	nucleus
C08A9.1	GO:0005739	cellular_component	mitochondrion
C08B11.1	GO:0005575	cellular_component	cellular_component
C08B11.3	GO:0005622	cellular_component	intracellular
C08B11.7	GO:0005622	cellular_component	intracellular
C08B11.8	GO:0005789	cellular_component	endoplasmic reticulum membrane
C08B11.8	GO:0016021	cellular_component	integral to membrane
C08B6.1	GO:0016021	cellular_component	integral to membrane
C08B6.8	GO:0005622	cellular_component	intracellular
C08C3.3	GO:0005634	cellular_component	nucleus
C08D8.1	GO:0016021	cellular_component	integral to membrane
C08D8.2	GO:0005856	cellular_component	cytoskeleton
C08F11.8	GO:0016021	cellular_component	integral to membrane
C08F8.1	GO:0016272	cellular_component	prefoldin complex
C08F8.4	GO:0016021	cellular_component	integral to membrane
C08F8.7	GO:0005622	cellular_component	intracellular
C08F8.7	GO:0016021	cellular_component	integral to membrane
C08F8.8	GO:0005634	cellular_component	nucleus
C08G5.4	GO:0008021	cellular_component	synaptic vesicle
C08G5.4	GO:0016020	cellular_component	membrane
C08G5.4	GO:0016021	cellular_component	integral to membrane
C08H9.3	GO:0005789	cellular_component	endoplasmic reticulum membrane
C08H9.3	GO:0016021	cellular_component	integral to membrane
C08H9.5	GO:0016021	cellular_component	integral to membrane
C09B7.1	GO:0005624	cellular_component	membrane fraction
C09B7.1	GO:0016021	cellular_component	integral to membrane
C09B8.7	GO:0005625	cellular_component	soluble fraction
C09B8.7	GO:0005626	cellular_component	insoluble fraction
C09B8.7	GO:0005886	cellular_component	plasma membrane
C09B8.7	GO:0030424	cellular_component	axon
C09B8.7	GO:0043025	cellular_component	cell soma
C09B9.3	GO:0016021	cellular_component	integral to membrane
C09D1.1	GO:0005622	cellular_component	intracellular
C09D1.1	GO:0005887	cellular_component	integral to plasma membrane
C09D1.1	GO:0031672	cellular_component	A band
C09D4.1	GO:0016021	cellular_component	integral to membrane
C09D4.5	GO:0005622	cellular_component	intracellular
C09D4.5	GO:0005840	cellular_component	ribosome
C09D8.1	GO:0005912	cellular_component	adherens junction
C09D8.1	GO:0016021	cellular_component	integral to membrane
C09D8.1	GO:0045202	cellular_component	synapse
C09F5.2	GO:0016021	cellular_component	integral to membrane
C09F5.3	GO:0005622	cellular_component	intracellular
C09G12.8	GO:0005622	cellular_component	intracellular
C09G12.8	GO:0005625	cellular_component	soluble fraction
C09G12.8	GO:0005626	cellular_component	insoluble fraction
C09G12.8	GO:0005886	cellular_component	plasma membrane
C09G12.8	GO:0009898	cellular_component	internal side of plasma membrane
C09G12.8	GO:0031410	cellular_component	cytoplasmic vesicle
C09G4.1	GO:0005789	cellular_component	endoplasmic reticulum membrane
C09G4.1	GO:0016021	cellular_component	integral to membrane
C09G4.5	GO:0000786	cellular_component	nucleosome
C09G5.1	GO:0016020	cellular_component	membrane
C09G5.1	GO:0016021	cellular_component	integral to membrane
C09G5.1	GO:0045211	cellular_component	postsynaptic membrane
C09G5.3	GO:0016021	cellular_component	integral to membrane
C09G5.4	GO:0016021	cellular_component	integral to membrane
C09G5.5	GO:0016021	cellular_component	integral to membrane
C09G5.6	GO:0005578	cellular_component	proteinaceous extracellular matrix
C09G5.6	GO:0016021	cellular_component	integral to membrane
C09G5.6	GO:0042601	cellular_component	endospore-forming forespore
C09G9.6	GO:0005737	cellular_component	cytoplasm
C09G9.6	GO:0005813	cellular_component	centrosome
C09G9.6	GO:0043186	cellular_component	P granule
C09H10.2	GO:0005622	cellular_component	intracellular
C09H10.2	GO:0005840	cellular_component	ribosome
C09H10.3	GO:0005739	cellular_component	mitochondrion
C09H5.2	GO:0016020	cellular_component	membrane
C09H5.2	GO:0016021	cellular_component	integral to membrane
C09H6.1	GO:0005622	cellular_component	intracellular
C09H6.2	GO:0000138	cellular_component	Golgi trans cisterna
C09H6.2	GO:0005737	cellular_component	cytoplasm
C09H6.2	GO:0005886	cellular_component	plasma membrane
C09H6.2	GO:0030140	cellular_component	trans-Golgi network transport vesicle
C09H6.2	GO:0043005	cellular_component	neuron projection
C09H6.2	GO:0043025	cellular_component	cell soma
C09H6.3	GO:0005737	cellular_component	cytoplasm
C09H6.3	GO:0030424	cellular_component	axon
C10C5.1	GO:0016021	cellular_component	integral to membrane
C10C5.3	GO:0005737	cellular_component	cytoplasm
C10C5.4	GO:0005737	cellular_component	cytoplasm
C10C5.5	GO:0005737	cellular_component	cytoplasm
C10C6.2	GO:0016021	cellular_component	integral to membrane
C10C6.5	GO:0016020	cellular_component	membrane
C10C6.5	GO:0016021	cellular_component	integral to membrane
C10C6.6	GO:0016020	cellular_component	membrane
C10C6.6	GO:0016021	cellular_component	integral to membrane
C10E2.3	GO:0000118	cellular_component	histone deacetylase complex
C10E2.3	GO:0005634	cellular_component	nucleus
C10E2.3	GO:0005737	cellular_component	cytoplasm
C10E2.6	GO:0016021	cellular_component	integral to membrane
C10F3.2	GO:0016021	cellular_component	integral to membrane
C10F3.3	GO:0005886	cellular_component	plasma membrane
C10F3.3	GO:0016021	cellular_component	integral to membrane
C10F3.5	GO:0005737	cellular_component	cytoplasm
C10F3.5	GO:0005829	cellular_component	cytosol
C10F3.6	GO:0016021	cellular_component	integral to membrane
C10F3.6	GO:0032580	cellular_component	Golgi cisterna membrane
C10G6.1	GO:0005622	cellular_component	intracellular
C10G8.5	GO:0016020	cellular_component	membrane
C10G8.5	GO:0016021	cellular_component	integral to membrane
C10G8.7	GO:0005634	cellular_component	nucleus
C10H11.3	GO:0016021	cellular_component	integral to membrane
C10H11.4	GO:0016021	cellular_component	integral to membrane
C10H11.5	GO:0016021	cellular_component	integral to membrane
C10H11.6	GO:0016021	cellular_component	integral to membrane
C10H11.9	GO:0005634	cellular_component	nucleus
C10H11.9	GO:0005737	cellular_component	cytoplasm
C10H11.9	GO:0005913	cellular_component	cell-cell adherens junction
C10H11.9	GO:0043292	cellular_component	contractile fiber
C11D2.6	GO:0016020	cellular_component	membrane
C11D2.6	GO:0016021	cellular_component	integral to membrane
C11D9.1	GO:0005622	cellular_component	intracellular
C11H1.2	GO:0016021	cellular_component	integral to membrane
C11H1.4	GO:0005777	cellular_component	peroxisome
C12C8.3	GO:0005622	cellular_component	intracellular
C12C8.3	GO:0005737	cellular_component	cytoplasm
C12D12.2	GO:0005886	cellular_component	plasma membrane
C12D12.2	GO:0016020	cellular_component	membrane
C12D12.2	GO:0016021	cellular_component	integral to membrane
C12D12.2	GO:0042995	cellular_component	cell projection
C12D12.5	GO:0005634	cellular_component	nucleus
C12D8.10	GO:0005622	cellular_component	intracellular
C12D8.11	GO:0030529	cellular_component	ribonucleoprotein complex
C12D8.8	GO:0016021	cellular_component	integral to membrane
C13B4.1	GO:0016021	cellular_component	integral to membrane
C13B9.4	GO:0016020	cellular_component	membrane
C13B9.4	GO:0016021	cellular_component	integral to membrane
C13C4.5	GO:0016021	cellular_component	integral to membrane
C13D9.7	GO:0016021	cellular_component	integral to membrane
C13D9.8	GO:0016021	cellular_component	integral to membrane
C13D9.9	GO:0016021	cellular_component	integral to membrane
C13F10.5	GO:0016021	cellular_component	integral to membrane
C13G3.3	GO:0000159	cellular_component	protein phosphatase type 2A complex
C13G5.1	GO:0005634	cellular_component	nucleus
C14A11.3	GO:0005622	cellular_component	intracellular
C14A11.7	GO:0005622	cellular_component	intracellular
C14A4.2	GO:0005761	cellular_component	mitochondrial ribosome
C14A4.2	GO:0015935	cellular_component	small ribosomal subunit
C14A4.3	GO:0016021	cellular_component	integral to membrane
C14A4.3	GO:0031227	cellular_component	intrinsic to endoplasmic reticulum membrane
C14A4.4	GO:0000176	cellular_component	nuclear exosome (RNase complex)
C14A4.4	GO:0000178	cellular_component	exosome (RNase complex)
C14A4.4	GO:0005622	cellular_component	intracellular
C14A4.5	GO:0000178	cellular_component	exosome (RNase complex)
C14B1.1	GO:0005783	cellular_component	endoplasmic reticulum
C14B9.1	GO:0005737	cellular_component	cytoplasm
C14B9.2	GO:0005783	cellular_component	endoplasmic reticulum
C14B9.2	GO:0005788	cellular_component	endoplasmic reticulum lumen
C14B9.4	GO:0000793	cellular_component	condensed chromosome
C14B9.4	GO:0005737	cellular_component	cytoplasm
C14B9.4	GO:0005813	cellular_component	centrosome
C14B9.4	GO:0051233	cellular_component	spindle midzone
C14B9.7	GO:0005622	cellular_component	intracellular
C14B9.7	GO:0005840	cellular_component	ribosome
C14C10.1	GO:0016020	cellular_component	membrane
C14C10.1	GO:0016021	cellular_component	integral to membrane
C14C11.3	GO:0016021	cellular_component	integral to membrane
C14F5.1	GO:0016021	cellular_component	integral to membrane
C14F5.1	GO:0043234	cellular_component	protein complex
C14F5.4	GO:0016020	cellular_component	membrane
C14F5.4	GO:0016021	cellular_component	integral to membrane
C14H10.1	GO:0016020	cellular_component	membrane
C14H10.1	GO:0016021	cellular_component	integral to membrane
C15A11.1	GO:0016021	cellular_component	integral to membrane
C15A11.5	GO:0016021	cellular_component	integral to membrane
C15A11.6	GO:0016021	cellular_component	integral to membrane
C15A7.2	GO:0016021	cellular_component	integral to membrane
C15B12.7	GO:0005886	cellular_component	plasma membrane
C15B12.7	GO:0016020	cellular_component	membrane
C15B12.7	GO:0016021	cellular_component	integral to membrane
C15C6.4	GO:0000172	cellular_component	ribonuclease MRP complex
C15C6.4	GO:0005655	cellular_component	nucleolar ribonuclease P complex
C15C6.4	GO:0030677	cellular_component	ribonuclease P complex
C15C7.1	GO:0016020	cellular_component	membrane
C15C7.1	GO:0016021	cellular_component	integral to membrane
C15C8.2	GO:0005634	cellular_component	nucleus
C15F1.3	GO:0005737	cellular_component	cytoplasm
C15F1.3	GO:0005886	cellular_component	plasma membrane
C15F1.3	GO:0005887	cellular_component	integral to plasma membrane
C15F1.3	GO:0016021	cellular_component	integral to membrane
C15F1.3	GO:0048471	cellular_component	perinuclear region of cytoplasm
C15F1.4	GO:0005737	cellular_component	cytoplasm
C15F1.6	GO:0016021	cellular_component	integral to membrane
C15F1.7	GO:0005739	cellular_component	mitochondrion
C15F1.7	GO:0005829	cellular_component	cytosol
C15H11.3	GO:0005634	cellular_component	nucleus
C15H11.3	GO:0005635	cellular_component	nuclear envelope
C15H11.3	GO:0005654	cellular_component	nucleoplasm
C15H11.4	GO:0016021	cellular_component	integral to membrane
C15H11.7	GO:0005839	cellular_component	proteasome core complex
C15H11.7	GO:0019773	cellular_component	proteasome core complex, alpha-subunit complex
C15H11.9	GO:0005634	cellular_component	nucleus
C15H9.1	GO:0016021	cellular_component	integral to membrane
C15H9.4	GO:0016021	cellular_component	integral to membrane
C15H9.5	GO:0016021	cellular_component	integral to membrane
C15H9.6	GO:0005788	cellular_component	endoplasmic reticulum lumen
C15H9.7	GO:0005737	cellular_component	cytoplasm
C15H9.8	GO:0005779	cellular_component	integral to peroxisomal membrane
C16A3.1	GO:0005634	cellular_component	nucleus
C16A3.3	GO:0005622	cellular_component	intracellular
C16A3.3	GO:0005634	cellular_component	nucleus
C16A3.4	GO:0005622	cellular_component	intracellular
C16A3.7	GO:0005634	cellular_component	nucleus
C16A3.9	GO:0005622	cellular_component	intracellular
C16A3.9	GO:0005840	cellular_component	ribosome
C16B8.1	GO:0016021	cellular_component	integral to membrane
C16C10.1	GO:0016020	cellular_component	membrane
C16C10.1	GO:0016021	cellular_component	integral to membrane
C16C10.12	GO:0016020	cellular_component	membrane
C16C10.12	GO:0016021	cellular_component	integral to membrane
C16C10.2	GO:0032040	cellular_component	small-subunit processome
C16C10.5	GO:0000139	cellular_component	Golgi membrane
C16C10.5	GO:0005789	cellular_component	endoplasmic reticulum membrane
C16C10.5	GO:0016021	cellular_component	integral to membrane
C16C10.5	GO:0033017	cellular_component	sarcoplasmic reticulum membrane
C16C10.7	GO:0005634	cellular_component	nucleus
C16C10.7	GO:0016021	cellular_component	integral to membrane
C16C2.1	GO:0005634	cellular_component	nucleus
C16C2.2	GO:0005737	cellular_component	cytoplasm
C16C2.2	GO:0005834	cellular_component	heterotrimeric G-protein complex
C16C2.2	GO:0043005	cellular_component	neuron projection
C16C2.3	GO:0005622	cellular_component	intracellular
C16D6.2	GO:0016021	cellular_component	integral to membrane
C16D9.2	GO:0016021	cellular_component	integral to membrane
C16D9.6	GO:0016020	cellular_component	membrane
C16D9.6	GO:0016021	cellular_component	integral to membrane
C17A2.3	GO:0016020	cellular_component	membrane
C17A2.3	GO:0016021	cellular_component	integral to membrane
C17C3.1	GO:0016021	cellular_component	integral to membrane
C17D12.2	GO:0016607	cellular_component	nuclear speck
C17D12.6	GO:0005737	cellular_component	cytoplasm
C17D12.6	GO:0005886	cellular_component	plasma membrane
C17D12.6	GO:0009986	cellular_component	cell surface
C17D12.6	GO:0016021	cellular_component	integral to membrane
C17D12.6	GO:0031143	cellular_component	pseudopodium
C17D12.6	GO:0043227	cellular_component	membrane-bounded organelle
C17E4.3	GO:0016021	cellular_component	integral to membrane
C17E4.6	GO:0005634	cellular_component	nucleus
C17E4.9	GO:0016020	cellular_component	membrane
C17E4.9	GO:0016021	cellular_component	integral to membrane
C17F4.8	GO:0008076	cellular_component	voltage-gated potassium channel complex
C17F4.8	GO:0016020	cellular_component	membrane
C17G1.3	GO:0016021	cellular_component	integral to membrane
C17G1.8	GO:0016021	cellular_component	integral to membrane
C17G10.4	GO:0005819	cellular_component	spindle
C17G10.4	GO:0030496	cellular_component	midbody
C17H11.6	GO:0016021	cellular_component	integral to membrane
C17H12.14	GO:0005737	cellular_component	cytoplasm
C17H12.14	GO:0005886	cellular_component	plasma membrane
C17H12.14	GO:0033178	cellular_component	proton-transporting two-sector ATPase complex, catalytic domain
C17H12.2	GO:0016021	cellular_component	integral to membrane
C17H12.9	GO:0033178	cellular_component	proton-transporting two-sector ATPase complex, catalytic domain
C18A3.4	GO:0016021	cellular_component	integral to membrane
C18A3.6	GO:0005622	cellular_component	intracellular
C18A3.6	GO:0005634	cellular_component	nucleus
C18A3.6	GO:0005737	cellular_component	cytoplasm
C18A3.6	GO:0008021	cellular_component	synaptic vesicle
C18A3.8	GO:0005634	cellular_component	nucleus
C18B12.2	GO:0016020	cellular_component	membrane
C18B12.2	GO:0016021	cellular_component	integral to membrane
C18B12.3	GO:0005634	cellular_component	nucleus
C18B12.4	GO:0016021	cellular_component	integral to membrane
C18B12.6	GO:0016021	cellular_component	integral to membrane
C18B2.6	GO:0016020	cellular_component	membrane
C18B2.6	GO:0016021	cellular_component	integral to membrane
C18C4.10	GO:0005635	cellular_component	nuclear envelope
C18C4.10	GO:0005737	cellular_component	cytoplasm
C18C4.10	GO:0005871	cellular_component	kinesin complex
C18C4.10	GO:0016938	cellular_component	kinesin I complex
C18C4.2	GO:0016021	cellular_component	integral to membrane
C18C4.3	GO:0005737	cellular_component	cytoplasm
C18C4.3	GO:0016021	cellular_component	integral to membrane
C18D1.4	GO:0016021	cellular_component	integral to membrane
C18D11.2	GO:0000299	cellular_component	integral to membrane of membrane fraction
C18D11.2	GO:0016021	cellular_component	integral to membrane
C18D11.2	GO:0030173	cellular_component	integral to Golgi membrane
C18D11.2	GO:0031303	cellular_component	integral to endosome membrane
C18D11.2	GO:0045177	cellular_component	apical part of cell
C18D11.2	GO:0045178	cellular_component	basal part of cell
C18D11.2	GO:0055038	cellular_component	recycling endosome membrane
C18E3.8	GO:0016021	cellular_component	integral to membrane
C18E9.10	GO:0016021	cellular_component	integral to membrane
C18E9.11	GO:0000922	cellular_component	spindle pole
C18E9.11	GO:0005783	cellular_component	endoplasmic reticulum
C18E9.11	GO:0005818	cellular_component	aster
C18E9.11	GO:0005819	cellular_component	spindle
C18E9.11	GO:0005886	cellular_component	plasma membrane
C18E9.11	GO:0016021	cellular_component	integral to membrane
C18E9.11	GO:0048471	cellular_component	perinuclear region of cytoplasm
C18E9.2	GO:0016021	cellular_component	integral to membrane
C18E9.4	GO:0005739	cellular_component	mitochondrion
C18E9.6	GO:0005741	cellular_component	mitochondrial outer membrane
C18F3.2	GO:0005913	cellular_component	cell-cell adherens junction
C18F3.2	GO:0016021	cellular_component	integral to membrane
C18F3.2	GO:0016328	cellular_component	lateral plasma membrane
C18G1.3	GO:0016021	cellular_component	integral to membrane
C18G1.5	GO:0000786	cellular_component	nucleosome
C18G1.5	GO:0005634	cellular_component	nucleus
C18H7.1	GO:0016021	cellular_component	integral to membrane
C18H7.3	GO:0016021	cellular_component	integral to membrane
C18H9.7	GO:0045202	cellular_component	synapse
C18H9.8	GO:0005929	cellular_component	cilium
C23G10.3	GO:0005622	cellular_component	intracellular
C23G10.3	GO:0005840	cellular_component	ribosome
C23G10.3	GO:0015935	cellular_component	small ribosomal subunit
C23G10.4	GO:0000502	cellular_component	proteasome complex
C23G10.6	GO:0016021	cellular_component	integral to membrane
C23H3.3	GO:0005737	cellular_component	cytoplasm
C23H3.9	GO:0016021	cellular_component	integral to membrane
C23H4.1	GO:0005623	cellular_component	cell
C23H4.1	GO:0016021	cellular_component	integral to membrane
C23H5.7	GO:0016021	cellular_component	integral to membrane
C24A11.8	GO:0016021	cellular_component	integral to membrane
C24A3.6	GO:0016020	cellular_component	membrane
C24A3.6	GO:0016021	cellular_component	integral to membrane
C24A8.1	GO:0016021	cellular_component	integral to membrane
C24A8.6	GO:0016021	cellular_component	integral to membrane
C24B5.2	GO:0005856	cellular_component	cytoskeleton
C24B5.2	GO:0048471	cellular_component	perinuclear region of cytoplasm
C24B5.3	GO:0016020	cellular_component	membrane
C24B5.3	GO:0016021	cellular_component	integral to membrane
C24B5.4	GO:0005634	cellular_component	nucleus
C24F3.1	GO:0016021	cellular_component	integral to membrane
C24F3.6	GO:0016021	cellular_component	integral to membrane
C24G7.1	GO:0016020	cellular_component	membrane
C24G7.1	GO:0016021	cellular_component	integral to membrane
C24G7.2	GO:0016020	cellular_component	membrane
C24G7.2	GO:0016021	cellular_component	integral to membrane
C24G7.2	GO:0031224	cellular_component	intrinsic to membrane
C24G7.4	GO:0016020	cellular_component	membrane
C24G7.4	GO:0016021	cellular_component	integral to membrane
C24H11.3	GO:0005634	cellular_component	nucleus
C24H11.6	GO:0016020	cellular_component	membrane
C24H11.7	GO:0005622	cellular_component	intracellular
C24H11.8	GO:0016021	cellular_component	integral to membrane
C25A1.11	GO:0005622	cellular_component	intracellular
C25A1.11	GO:0005634	cellular_component	nucleus
C25A1.5	GO:0005783	cellular_component	endoplasmic reticulum
C25A1.5	GO:0016021	cellular_component	integral to membrane
C25A1.7	GO:0005737	cellular_component	cytoplasm
C25A1.9	GO:0000159	cellular_component	protein phosphatase type 2A complex
C25A1.9	GO:0005813	cellular_component	centrosome
C25A11.4	GO:0005913	cellular_component	cell-cell adherens junction
C25A11.4	GO:0016021	cellular_component	integral to membrane
C25A11.4	GO:0016327	cellular_component	apicolateral plasma membrane
C25A11.4	GO:0043296	cellular_component	apical junction complex
C25B8.1	GO:0008076	cellular_component	voltage-gated potassium channel complex
C25B8.1	GO:0016020	cellular_component	membrane
C25B8.1	GO:0016021	cellular_component	integral to membrane
C25B8.4	GO:0016021	cellular_component	integral to membrane
C25D7.6	GO:0005634	cellular_component	nucleus
C25D7.7	GO:0005622	cellular_component	intracellular
C25E10.2	GO:0016021	cellular_component	integral to membrane
C25E10.3	GO:0016021	cellular_component	integral to membrane
C25E10.4	GO:0016021	cellular_component	integral to membrane
C25E10.5	GO:0016021	cellular_component	integral to membrane
C25F6.2	GO:0005912	cellular_component	adherens junction
C25F6.2	GO:0005915	cellular_component	zonula adherens
C25F6.3	GO:0005737	cellular_component	cytoplasm
C25F6.4	GO:0016021	cellular_component	integral to membrane
C25F6.7	GO:0016021	cellular_component	integral to membrane
C25G4.4	GO:0005634	cellular_component	nucleus
C25G6.2	GO:0016021	cellular_component	integral to membrane
C25G6.5	GO:0016021	cellular_component	integral to membrane
C25H3.9	GO:0016021	cellular_component	integral to membrane
C26B2.6	GO:0033588	cellular_component	Elongator holoenzyme complex
C26C6.1	GO:0005622	cellular_component	intracellular
C26C6.1	GO:0005634	cellular_component	nucleus
C26C6.2	GO:0005634	cellular_component	nucleus
C26C6.2	GO:0005737	cellular_component	cytoplasm
C26C6.2	GO:0005938	cellular_component	cell cortex
C26D10.2	GO:0005634	cellular_component	nucleus
C26E6.12	GO:0005622	cellular_component	intracellular
C26E6.12	GO:0016021	cellular_component	integral to membrane
C26E6.5	GO:0043005	cellular_component	neuron projection
C26E6.6	GO:0005622	cellular_component	intracellular
C26E6.6	GO:0005840	cellular_component	ribosome
C26E6.9	GO:0005634	cellular_component	nucleus
C26F1.2	GO:0016021	cellular_component	integral to membrane
C26F1.4	GO:0005622	cellular_component	intracellular
C26F1.4	GO:0005840	cellular_component	ribosome
C26F1.7	GO:0016021	cellular_component	integral to membrane
C26F1.9	GO:0005622	cellular_component	intracellular
C26F1.9	GO:0005840	cellular_component	ribosome
C26G2.1	GO:0005887	cellular_component	integral to plasma membrane
C26G2.1	GO:0016021	cellular_component	integral to membrane
C26H9A.1	GO:0016021	cellular_component	integral to membrane
C26H9A.1	GO:0033177	cellular_component	proton-transporting two-sector ATPase complex, proton-transporting domain
C27A12.5	GO:0005634	cellular_component	nucleus
C27A12.9	GO:0016021	cellular_component	integral to membrane
C27A2.1	GO:0005694	cellular_component	chromosome
C27A2.2	GO:0005622	cellular_component	intracellular
C27A2.2	GO:0005840	cellular_component	ribosome
C27A2.5	GO:0005576	cellular_component	extracellular region
C27A2.6	GO:0005622	cellular_component	intracellular
C27A2.6	GO:0005938	cellular_component	cell cortex
C27A2.7	GO:0005622	cellular_component	intracellular
C27A7.1	GO:0016021	cellular_component	integral to membrane
C27A7.3	GO:0016021	cellular_component	integral to membrane
C27A7.4	GO:0030991	cellular_component	intraflagellar transport particle A
C27B7.1	GO:0005634	cellular_component	nucleus
C27B7.4	GO:0016021	cellular_component	integral to membrane
C27B7.8	GO:0005622	cellular_component	intracellular
C27C12.2	GO:0005622	cellular_component	intracellular
C27C12.4	GO:0016021	cellular_component	integral to membrane
C27C12.6	GO:0005634	cellular_component	nucleus
C27C12.7	GO:0016020	cellular_component	membrane
C27C12.7	GO:0016021	cellular_component	integral to membrane
C27D6.4	GO:0005634	cellular_component	nucleus
C27F2.2	GO:0016020	cellular_component	membrane
C27F2.2	GO:0016021	cellular_component	integral to membrane
C27F2.8	GO:0016021	cellular_component	integral to membrane
C27H5.3	GO:0005622	cellular_component	intracellular
C27H5.4	GO:0016021	cellular_component	integral to membrane
C27H5.8	GO:0016020	cellular_component	membrane
C27H5.8	GO:0016021	cellular_component	integral to membrane
C27H5.8	GO:0045211	cellular_component	postsynaptic membrane
C27H6.1	GO:0030131	cellular_component	clathrin adaptor complex
C27H6.1	GO:0045202	cellular_component	synapse
C28A5.4	GO:0005634	cellular_component	nucleus
C28C12.10	GO:0005622	cellular_component	intracellular
C28C12.7	GO:0005764	cellular_component	lysosome
C28D4.2	GO:0005737	cellular_component	cytoplasm
C28D4.2	GO:0005938	cellular_component	cell cortex
C28G1.3	GO:0000145	cellular_component	exocyst
C28G1.5	GO:0005622	cellular_component	intracellular
C28G1.6	GO:0005622	cellular_component	intracellular
C28H8.12	GO:0000242	cellular_component	pericentriolar material
C28H8.12	GO:0005737	cellular_component	cytoplasm
C28H8.12	GO:0005813	cellular_component	centrosome
C28H8.12	GO:0005869	cellular_component	dynactin complex
C28H8.12	GO:0005876	cellular_component	spindle microtubule
C28H8.3	GO:0005737	cellular_component	cytoplasm
C28H8.4	GO:0016021	cellular_component	integral to membrane
C28H8.9	GO:0005622	cellular_component	intracellular
C29A12.4	GO:0016021	cellular_component	integral to membrane
C29E4.1	GO:0016021	cellular_component	integral to membrane
C29E4.7	GO:0005737	cellular_component	cytoplasm
C29E6.2	GO:0016020	cellular_component	membrane
C29E6.2	GO:0016021	cellular_component	integral to membrane
C29F3.1	GO:0005739	cellular_component	mitochondrion
C29F3.1	GO:0016507	cellular_component	fatty acid beta-oxidation multienzyme complex
C29F4.1	GO:0016021	cellular_component	integral to membrane
C29F4.2	GO:0016021	cellular_component	integral to membrane
C29F9.7	GO:0005912	cellular_component	adherens junction
C29F9.7	GO:0008305	cellular_component	integrin complex
C29H12.1	GO:0005737	cellular_component	cytoplasm
C29H12.2	GO:0000139	cellular_component	Golgi membrane
C29H12.2	GO:0016020	cellular_component	membrane
C29H12.2	GO:0016021	cellular_component	integral to membrane
C30A5.7	GO:0005634	cellular_component	nucleus
C30A5.7	GO:0016021	cellular_component	integral to membrane
C30B5.2	GO:0016021	cellular_component	integral to membrane
C30C11.1	GO:0015934	cellular_component	large ribosomal subunit
C30C11.2	GO:0000502	cellular_component	proteasome complex
C30D11.1	GO:0016020	cellular_component	membrane
C30D11.1	GO:0016021	cellular_component	integral to membrane
C30F12.6	GO:0016021	cellular_component	integral to membrane
C30F12.7	GO:0005739	cellular_component	mitochondrion
C30F8.2	GO:0033177	cellular_component	proton-transporting two-sector ATPase complex, proton-transporting domain
C30F8.2	GO:0033179	cellular_component	proton-transporting V-type ATPase, V0 domain
C30F8.4	GO:0005925	cellular_component	focal adhesion
C30G12.7	GO:0005622	cellular_component	intracellular
C30G7.1	GO:0000786	cellular_component	nucleosome
C30G7.1	GO:0005634	cellular_component	nucleus
C30G7.1	GO:0005730	cellular_component	nucleolus
C30G7.1	GO:0045111	cellular_component	intermediate filament cytoskeleton
C30H6.2	GO:0016020	cellular_component	membrane
C30H6.2	GO:0016021	cellular_component	integral to membrane
C30H6.6	GO:0016021	cellular_component	integral to membrane
C31B8.8	GO:0031012	cellular_component	extracellular matrix
C31E10.6	GO:0016021	cellular_component	integral to membrane
C31E10.7	GO:0016021	cellular_component	integral to membrane
C31E10.8	GO:0005622	cellular_component	intracellular
C31E10.8	GO:0016020	cellular_component	membrane
C31E10.8	GO:0016021	cellular_component	integral to membrane
C31H2.1	GO:0005622	cellular_component	intracellular
C31H5.3	GO:0016020	cellular_component	membrane
C31H5.3	GO:0016021	cellular_component	integral to membrane
C31H5.3	GO:0045211	cellular_component	postsynaptic membrane
C32A3.1	GO:0005634	cellular_component	nucleus
C32A3.3	GO:0016021	cellular_component	integral to membrane
C32C4.1	GO:0008076	cellular_component	voltage-gated potassium channel complex
C32C4.1	GO:0016020	cellular_component	membrane
C32C4.1	GO:0016021	cellular_component	integral to membrane
C32C4.2	GO:0005929	cellular_component	cilium
C32C4.2	GO:0016020	cellular_component	membrane
C32C4.2	GO:0016021	cellular_component	integral to membrane
C32C4.2	GO:0043025	cellular_component	cell soma
C32C4.7	GO:0016021	cellular_component	integral to membrane
C32D5.2	GO:0016020	cellular_component	membrane
C32D5.2	GO:0016021	cellular_component	integral to membrane
C32D5.9	GO:0005737	cellular_component	cytoplasm
C32D5.9	GO:0005776	cellular_component	autophagic vacuole
C32E12.5	GO:0005634	cellular_component	nucleus
C32E8.10	GO:0030118	cellular_component	clathrin coat
C32E8.10	GO:0042734	cellular_component	presynaptic membrane
C32E8.2	GO:0005622	cellular_component	intracellular
C32E8.2	GO:0005840	cellular_component	ribosome
C32E8.7	GO:0005737	cellular_component	cytoplasm
C32E8.8	GO:0016020	cellular_component	membrane
C32E8.8	GO:0016021	cellular_component	integral to membrane
C32F10.2	GO:0005634	cellular_component	nucleus
C32F10.5	GO:0005634	cellular_component	nucleus
C33A11.2	GO:0016021	cellular_component	integral to membrane
C33A11.4	GO:0005634	cellular_component	nucleus
C33A12.1	GO:0005743	cellular_component	mitochondrial inner membrane
C33A12.6	GO:0016021	cellular_component	integral to membrane
C33C12.3	GO:0005764	cellular_component	lysosome
C33C12.8	GO:0005764	cellular_component	lysosome
C33C12.9	GO:0005737	cellular_component	cytoplasm
C33D12.1	GO:0005634	cellular_component	nucleus
C33D12.2	GO:0016021	cellular_component	integral to membrane
C33D12.6	GO:0005622	cellular_component	intracellular
C33D12.6	GO:0005840	cellular_component	ribosome
C33D12.7	GO:0005634	cellular_component	nucleus
C33D9.1	GO:0005622	cellular_component	intracellular
C33D9.1	GO:0045179	cellular_component	apical cortex
C33F10.12	GO:0016020	cellular_component	membrane
C33F10.14	GO:0005737	cellular_component	cytoplasm
C33F10.2	GO:0005622	cellular_component	intracellular
C33F10.5	GO:0016021	cellular_component	integral to membrane
C33G3.1	GO:0030424	cellular_component	axon
C33G3.1	GO:0055120	cellular_component	striated muscle dense body
C33H5.12	GO:0005634	cellular_component	nucleus
C33H5.14	GO:0016021	cellular_component	integral to membrane
C33H5.17	GO:0005622	cellular_component	intracellular
C33H5.18	GO:0016020	cellular_component	membrane
C33H5.18	GO:0016021	cellular_component	integral to membrane
C33H5.19	GO:0016021	cellular_component	integral to membrane
C33H5.9	GO:0005737	cellular_component	cytoplasm
C34B2.10	GO:0005783	cellular_component	endoplasmic reticulum
C34B2.10	GO:0005787	cellular_component	signal peptidase complex
C34B2.10	GO:0016021	cellular_component	integral to membrane
C34B2.8	GO:0016021	cellular_component	integral to membrane
C34B4.1	GO:0005856	cellular_component	cytoskeleton
C34B7.3	GO:0016021	cellular_component	integral to membrane
C34B7.4	GO:0005634	cellular_component	nucleus
C34C12.4	GO:0016021	cellular_component	integral to membrane
C34C12.8	GO:0005739	cellular_component	mitochondrion
C34C6.8	GO:0005634	cellular_component	nucleus
C34D1.3	GO:0043025	cellular_component	cell soma
C34D10.1	GO:0016021	cellular_component	integral to membrane
C34D4.14	GO:0005622	cellular_component	intracellular
C34D4.15	GO:0016021	cellular_component	integral to membrane
C34D4.4	GO:0016021	cellular_component	integral to membrane
C34D4.9	GO:0016021	cellular_component	integral to membrane
C34E10.1	GO:0019867	cellular_component	outer membrane
C34E10.4	GO:0005737	cellular_component	cytoplasm
C34E10.4	GO:0005778	cellular_component	peroxisomal membrane
C34E10.4	GO:0016021	cellular_component	integral to membrane
C34E10.5	GO:0005634	cellular_component	nucleus
C34E10.5	GO:0005737	cellular_component	cytoplasm
C34E10.6	GO:0005739	cellular_component	mitochondrion
C34E10.6	GO:0005929	cellular_component	cilium
C34E10.6	GO:0016469	cellular_component	proton-transporting two-sector ATPase complex
C34E10.6	GO:0033178	cellular_component	proton-transporting two-sector ATPase complex, catalytic domain
C34E10.6	GO:0045261	cellular_component	proton-transporting ATP synthase complex, catalytic core F(1)
C34E10.7	GO:0005634	cellular_component	nucleus
C34F11.9	GO:0005622	cellular_component	intracellular
C34F6.10	GO:0016021	cellular_component	integral to membrane
C34F6.2	GO:0016021	cellular_component	integral to membrane
C34F6.3	GO:0016021	cellular_component	integral to membrane
C34F6.4	GO:0016021	cellular_component	integral to membrane
C34F6.7	GO:0016021	cellular_component	integral to membrane
C34G6.4	GO:0016021	cellular_component	integral to membrane
C34G6.4	GO:0031090	cellular_component	organelle membrane
C34G6.7	GO:0005769	cellular_component	early endosome
C34H3.1	GO:0016021	cellular_component	integral to membrane
C34H3.2	GO:0005622	cellular_component	intracellular
C34H4.4	GO:0016021	cellular_component	integral to membrane
C34H4.5	GO:0005622	cellular_component	intracellular
C35A11.4	GO:0016020	cellular_component	membrane
C35A11.4	GO:0016021	cellular_component	integral to membrane
C35A5.1	GO:0009986	cellular_component	cell surface
C35A5.1	GO:0016020	cellular_component	membrane
C35A5.1	GO:0016021	cellular_component	integral to membrane
C35A5.2	GO:0016021	cellular_component	integral to membrane
C35B8.1	GO:0016021	cellular_component	integral to membrane
C35B8.2	GO:0005622	cellular_component	intracellular
C35B8.2	GO:0005942	cellular_component	phosphoinositide 3-kinase complex
C35C5.10	GO:0016021	cellular_component	integral to membrane
C35C5.11	GO:0016021	cellular_component	integral to membrane
C35C5.2	GO:0016021	cellular_component	integral to membrane
C35C5.4	GO:0005622	cellular_component	intracellular
C35C5.4	GO:0009898	cellular_component	internal side of plasma membrane
C35C5.4	GO:0043005	cellular_component	neuron projection
C35D10.1	GO:0016021	cellular_component	integral to membrane
C35D10.10	GO:0016021	cellular_component	integral to membrane
C35D10.14	GO:0016021	cellular_component	integral to membrane
C35D10.15	GO:0016021	cellular_component	integral to membrane
C35D10.16	GO:0005856	cellular_component	cytoskeleton
C36A4.1	GO:0016021	cellular_component	integral to membrane
C36A4.2	GO:0016021	cellular_component	integral to membrane
C36A4.3	GO:0016021	cellular_component	integral to membrane
C36A4.5	GO:0016021	cellular_component	integral to membrane
C36A4.6	GO:0016021	cellular_component	integral to membrane
C36B1.1	GO:0005604	cellular_component	basement membrane
C36B1.1	GO:0030054	cellular_component	cell junction
C36B1.1	GO:0031012	cellular_component	extracellular matrix
C36B1.12	GO:0016021	cellular_component	integral to membrane
C36B1.4	GO:0005839	cellular_component	proteasome core complex
C36B1.4	GO:0019773	cellular_component	proteasome core complex, alpha-subunit complex
C36B7.6	GO:0016021	cellular_component	integral to membrane
C36E6.3	GO:0005859	cellular_component	muscle myosin complex
C36E8.3	GO:0016021	cellular_component	integral to membrane
C36E8.5	GO:0005874	cellular_component	microtubule
C36E8.5	GO:0005876	cellular_component	spindle microtubule
C36E8.5	GO:0043234	cellular_component	protein complex
C36E8.5	GO:0045298	cellular_component	tubulin complex
C36F7.1	GO:0005634	cellular_component	nucleus
C37A2.4	GO:0000307	cellular_component	cyclin-dependent protein kinase holoenzyme complex
C37A2.4	GO:0005634	cellular_component	nucleus
C37A2.6	GO:0005737	cellular_component	cytoplasm
C37A2.7	GO:0005622	cellular_component	intracellular
C37A2.7	GO:0005840	cellular_component	ribosome
C37A5.1	GO:0016021	cellular_component	integral to membrane
C37C3.12	GO:0016021	cellular_component	integral to membrane
C37C3.6	GO:0005578	cellular_component	proteinaceous extracellular matrix
C37C3.6	GO:0031012	cellular_component	extracellular matrix
C37C3.7	GO:0016021	cellular_component	integral to membrane
C37E2.1	GO:0005739	cellular_component	mitochondrion
C37E2.2	GO:0016021	cellular_component	integral to membrane
C37E2.3	GO:0016021	cellular_component	integral to membrane
C37E2.5	GO:0000781	cellular_component	chromosome, telomeric region
C37E2.5	GO:0005634	cellular_component	nucleus
C37H5.6	GO:0005737	cellular_component	cytoplasm
C37H5.8	GO:0005739	cellular_component	mitochondrion
C38C10.1	GO:0016021	cellular_component	integral to membrane
C38C10.2	GO:0016021	cellular_component	integral to membrane
C38C10.5	GO:0016592	cellular_component	Srb-mediator complex
C38C3.5	GO:0005622	cellular_component	intracellular
C38C3.5	GO:0005737	cellular_component	cytoplasm
C38C3.5	GO:0005865	cellular_component	striated muscle thin filament
C38C6.2	GO:0005886	cellular_component	plasma membrane
C38C6.2	GO:0016021	cellular_component	integral to membrane
C38D4.3	GO:0005635	cellular_component	nuclear envelope
C38D4.5	GO:0005622	cellular_component	intracellular
C38D4.6	GO:0000794	cellular_component	condensed nuclear chromosome
C38D4.6	GO:0005634	cellular_component	nucleus
C38D4.8	GO:0005622	cellular_component	intracellular
C38D4.8	GO:0005634	cellular_component	nucleus
C38D4.8	GO:0005737	cellular_component	cytoplasm
C38D4.8	GO:0005829	cellular_component	cytosol
C38D4.8	GO:0030425	cellular_component	dendrite
C38D4.8	GO:0035085	cellular_component	cilium axoneme
C38D4.9	GO:0005737	cellular_component	cytoplasm
C38H2.1	GO:0005622	cellular_component	intracellular
C38H2.2	GO:0016020	cellular_component	membrane
C38H2.2	GO:0016021	cellular_component	integral to membrane
C39B10.2	GO:0016020	cellular_component	membrane
C39B10.2	GO:0016021	cellular_component	integral to membrane
C39B10.2	GO:0045211	cellular_component	postsynaptic membrane
C39E6.4	GO:0005634	cellular_component	nucleus
C39E6.6	GO:0016021	cellular_component	integral to membrane
C39E9.10	GO:0016021	cellular_component	integral to membrane
C39E9.13	GO:0005634	cellular_component	nucleus
C39E9.2	GO:0005576	cellular_component	extracellular region
C39E9.3	GO:0016021	cellular_component	integral to membrane
C39E9.4	GO:0005576	cellular_component	extracellular region
C39E9.5	GO:0005576	cellular_component	extracellular region
C39E9.6	GO:0005576	cellular_component	extracellular region
C39E9.9	GO:0016021	cellular_component	integral to membrane
C39F7.2	GO:0005622	cellular_component	intracellular
C39F7.4	GO:0005622	cellular_component	intracellular
C39F7.4	GO:0005634	cellular_component	nucleus
C39F7.4	GO:0005737	cellular_component	cytoplasm
C40A11.2	GO:0008076	cellular_component	voltage-gated potassium channel complex
C40A11.2	GO:0016020	cellular_component	membrane
C40A11.3	GO:0008076	cellular_component	voltage-gated potassium channel complex
C40A11.3	GO:0016020	cellular_component	membrane
C40A11.4	GO:0008076	cellular_component	voltage-gated potassium channel complex
C40A11.4	GO:0016020	cellular_component	membrane
C40A11.6	GO:0008076	cellular_component	voltage-gated potassium channel complex
C40A11.6	GO:0016020	cellular_component	membrane
C40A11.7	GO:0008076	cellular_component	voltage-gated potassium channel complex
C40A11.7	GO:0016020	cellular_component	membrane
C40C9.1	GO:0016020	cellular_component	membrane
C40C9.1	GO:0016021	cellular_component	integral to membrane
C40C9.2	GO:0016020	cellular_component	membrane
C40C9.2	GO:0016021	cellular_component	integral to membrane
C40C9.2	GO:0045211	cellular_component	postsynaptic membrane
C40C9.5	GO:0016021	cellular_component	integral to membrane
C40H1.1	GO:0005737	cellular_component	cytoplasm
C40H1.4	GO:0016021	cellular_component	integral to membrane
C40H5.5	GO:0005634	cellular_component	nucleus
C41C4.10	GO:0016020	cellular_component	membrane
C41C4.10	GO:0016021	cellular_component	integral to membrane
C41C4.4	GO:0016021	cellular_component	integral to membrane
C41C4.5	GO:0016020	cellular_component	membrane
C41C4.5	GO:0016021	cellular_component	integral to membrane
C41C4.7	GO:0016021	cellular_component	integral to membrane
C41D11.8	GO:0005739	cellular_component	mitochondrion
C41D11.9	GO:0016021	cellular_component	integral to membrane
C41D7.2	GO:0016020	cellular_component	membrane
C41D7.2	GO:0016021	cellular_component	integral to membrane
C41G7.1	GO:0005634	cellular_component	nucleus
C41G7.5	GO:0005622	cellular_component	intracellular
C41G7.9	GO:0016021	cellular_component	integral to membrane
C42C1.10	GO:0005743	cellular_component	mitochondrial inner membrane
C42C1.10	GO:0016020	cellular_component	membrane
C42C1.10	GO:0016021	cellular_component	integral to membrane
C42C1.14	GO:0005622	cellular_component	intracellular
C42C1.14	GO:0005840	cellular_component	ribosome
C42C1.16	GO:0016021	cellular_component	integral to membrane
C42C1.2	GO:0008287	cellular_component	protein serine/threonine phosphatase complex
C42C1.8	GO:0016021	cellular_component	integral to membrane
C42D8.5	GO:0016020	cellular_component	membrane
C42D8.8	GO:0016021	cellular_component	integral to membrane
C42D8.8	GO:0031410	cellular_component	cytoplasmic vesicle
C43C3.2	GO:0016021	cellular_component	integral to membrane
C43E11.10	GO:0000794	cellular_component	condensed nuclear chromosome
C43E11.10	GO:0005634	cellular_component	nucleus
C43E11.10	GO:0005730	cellular_component	nucleolus
C43E11.10	GO:0005737	cellular_component	cytoplasm
C43E11.3	GO:0005634	cellular_component	nucleus
C43E11.6	GO:0005886	cellular_component	plasma membrane
C43E11.6	GO:0044456	cellular_component	synapse part
C43E11.6	GO:0048786	cellular_component	presynaptic active zone
C43E11.8	GO:0000145	cellular_component	exocyst
C43E11.8	GO:0005801	cellular_component	cis-Golgi network
C43E11.8	GO:0016020	cellular_component	membrane
C43E11.9	GO:0005634	cellular_component	nucleus
C43F9.8	GO:0016020	cellular_component	membrane
C43G2.1	GO:0016021	cellular_component	integral to membrane
C43G2.2	GO:0005794	cellular_component	Golgi apparatus
C43G2.2	GO:0016021	cellular_component	integral to membrane
C43G2.4	GO:0016021	cellular_component	integral to membrane
C43H6.7	GO:0016021	cellular_component	integral to membrane
C43H6.8	GO:0005634	cellular_component	nucleus
C43H6.9	GO:0016020	cellular_component	membrane
C43H6.9	GO:0016021	cellular_component	integral to membrane
C43H6.9	GO:0030288	cellular_component	outer membrane-bounded periplasmic space
C43H8.2	GO:0005634	cellular_component	nucleus
C44B11.3	GO:0005874	cellular_component	microtubule
C44B11.3	GO:0043234	cellular_component	protein complex
C44B7.11	GO:0016021	cellular_component	integral to membrane
C44B7.2	GO:0005634	cellular_component	nucleus
C44B7.4	GO:0016021	cellular_component	integral to membrane
C44B7.7	GO:0016021	cellular_component	integral to membrane
C44B7.8	GO:0016020	cellular_component	membrane
C44B7.8	GO:0016021	cellular_component	integral to membrane
C44B7.9	GO:0016020	cellular_component	membrane
C44B7.9	GO:0016021	cellular_component	integral to membrane
C44B9.1	GO:0005737	cellular_component	cytoplasm
C44C1.3	GO:0043025	cellular_component	cell soma
C44C1.5	GO:0016021	cellular_component	integral to membrane
C44C10.1	GO:0016021	cellular_component	integral to membrane
C44C11.1	GO:0005622	cellular_component	intracellular
C44E12.3	GO:0016020	cellular_component	membrane
C44E12.3	GO:0016021	cellular_component	integral to membrane
C44E4.4	GO:0005634	cellular_component	nucleus
C44E4.4	GO:0030529	cellular_component	ribonucleoprotein complex
C44F1.2	GO:0005634	cellular_component	nucleus
C44F1.5	GO:0005886	cellular_component	plasma membrane
C44F1.5	GO:0016021	cellular_component	integral to membrane
C44H4.1	GO:0016021	cellular_component	integral to membrane
C44H4.2	GO:0016021	cellular_component	integral to membrane
C44H4.3	GO:0005615	cellular_component	extracellular space
C44H9.1	GO:0016021	cellular_component	integral to membrane
C45B11.6	GO:0016020	cellular_component	membrane
C45B11.6	GO:0016021	cellular_component	integral to membrane
C45B2.4	GO:0016020	cellular_component	membrane
C45B2.4	GO:0016021	cellular_component	integral to membrane
C45B2.7	GO:0016020	cellular_component	membrane
C45B2.7	GO:0016021	cellular_component	integral to membrane
C45E1.1	GO:0005634	cellular_component	nucleus
C45G3.1	GO:0000922	cellular_component	spindle pole
C45G3.1	GO:0005819	cellular_component	spindle
C45G3.1	GO:0051233	cellular_component	spindle midzone
C45H4.2	GO:0016021	cellular_component	integral to membrane
C46A5.3	GO:0016021	cellular_component	integral to membrane
C46A5.9	GO:0005634	cellular_component	nucleus
C46C11.2	GO:0016021	cellular_component	integral to membrane
C46E1.2	GO:0005625	cellular_component	soluble fraction
C46F11.1	GO:0009986	cellular_component	cell surface
C46F11.1	GO:0016021	cellular_component	integral to membrane
C46F11.2	GO:0005737	cellular_component	cytoplasm
C46F4.2	GO:0016021	cellular_component	integral to membrane
C46G7.1	GO:0016021	cellular_component	integral to membrane
C46H11.3	GO:0005856	cellular_component	cytoskeleton
C47A10.1	GO:0016021	cellular_component	integral to membrane
C47A4.2	GO:0016020	cellular_component	membrane
C47A4.2	GO:0016021	cellular_component	integral to membrane
C47B2.3	GO:0005874	cellular_component	microtubule
C47B2.3	GO:0043234	cellular_component	protein complex
C47B2.4	GO:0005839	cellular_component	proteasome core complex
C47C12.3	GO:0005622	cellular_component	intracellular
C47C12.3	GO:0005634	cellular_component	nucleus
C47C12.3	GO:0005737	cellular_component	cytoplasm
C47C12.4	GO:0005622	cellular_component	intracellular
C47C12.6	GO:0016020	cellular_component	membrane
C47C12.6	GO:0016021	cellular_component	integral to membrane
C47D12.1	GO:0000123	cellular_component	histone acetyltransferase complex
C47D12.1	GO:0000793	cellular_component	condensed chromosome
C47D12.1	GO:0005634	cellular_component	nucleus
C47D12.3	GO:0016020	cellular_component	membrane
C47D12.3	GO:0016021	cellular_component	integral to membrane
C47D12.6	GO:0005737	cellular_component	cytoplasm
C47D2.2	GO:0005622	cellular_component	intracellular
C47E12.1	GO:0005737	cellular_component	cytoplasm
C47E12.2	GO:0005743	cellular_component	mitochondrial inner membrane
C47E12.2	GO:0016020	cellular_component	membrane
C47E12.2	GO:0016021	cellular_component	integral to membrane
C47E12.3	GO:0016020	cellular_component	membrane
C47E12.4	GO:0005737	cellular_component	cytoplasm
C47E12.4	GO:0016021	cellular_component	integral to membrane
C47E12.7	GO:0030688	cellular_component	preribosome, small subunit precursor
C47E12.8	GO:0005737	cellular_component	cytoplasm
C47E8.4	GO:0005634	cellular_component	nucleus
C47E8.5	GO:0005737	cellular_component	cytoplasm
C47E8.5	GO:0048471	cellular_component	perinuclear region of cytoplasm
C47E8.7	GO:0005886	cellular_component	plasma membrane
C47E8.7	GO:0030055	cellular_component	cell-substrate junction
C47F8.3	GO:0016020	cellular_component	membrane
C47F8.4	GO:0016020	cellular_component	membrane
C47F8.4	GO:0016021	cellular_component	integral to membrane
C47F8.5	GO:0016020	cellular_component	membrane
C47F8.5	GO:0016021	cellular_component	integral to membrane
C47F8.6	GO:0016020	cellular_component	membrane
C47G2.2	GO:0005634	cellular_component	nucleus
C47G2.3	GO:0016021	cellular_component	integral to membrane
C47G2.4	GO:0016021	cellular_component	integral to membrane
C48A7.1	GO:0005891	cellular_component	voltage-gated calcium channel complex
C48A7.1	GO:0016020	cellular_component	membrane
C48A7.1	GO:0016021	cellular_component	integral to membrane
C48A7.2	GO:0016020	cellular_component	membrane
C48A7.2	GO:0016021	cellular_component	integral to membrane
C48A7.2	GO:0030117	cellular_component	membrane coat
C48B4.1	GO:0005777	cellular_component	peroxisome
C48B4.2	GO:0016021	cellular_component	integral to membrane
C48B4.4	GO:0005886	cellular_component	plasma membrane
C48B4.4	GO:0016021	cellular_component	integral to membrane
C48B6.2	GO:0005622	cellular_component	intracellular
C48C5.1	GO:0016021	cellular_component	integral to membrane
C48D1.2	GO:0005622	cellular_component	intracellular
C48D1.2	GO:0005737	cellular_component	cytoplasm
C48D1.2	GO:0016020	cellular_component	membrane
C48D1.3	GO:0008021	cellular_component	synaptic vesicle
C48D1.3	GO:0016020	cellular_component	membrane
C48D1.3	GO:0016021	cellular_component	integral to membrane
C48D1.3	GO:0030424	cellular_component	axon
C48D1.3	GO:0043005	cellular_component	neuron projection
C48D1.3	GO:0043025	cellular_component	cell soma
C48D1.3	GO:0045202	cellular_component	synapse
C48D5.1	GO:0005634	cellular_component	nucleus
C48E7.11	GO:0005634	cellular_component	nucleus
C48E7.5	GO:0016021	cellular_component	integral to membrane
C48E7.6	GO:0016021	cellular_component	integral to membrane
C49A1.2	GO:0016021	cellular_component	integral to membrane
C49A1.3	GO:0016021	cellular_component	integral to membrane
C49A1.4	GO:0005634	cellular_component	nucleus
C49A9.7	GO:0016021	cellular_component	integral to membrane
C49A9.8	GO:0016021	cellular_component	integral to membrane
C49C8.4	GO:0016021	cellular_component	integral to membrane
C49F8.2	GO:0016021	cellular_component	integral to membrane
C49H3.10	GO:0005634	cellular_component	nucleus
C49H3.10	GO:0005737	cellular_component	cytoplasm
C49H3.11	GO:0005622	cellular_component	intracellular
C49H3.11	GO:0005840	cellular_component	ribosome
C49H3.11	GO:0015935	cellular_component	small ribosomal subunit
C49H3.9	GO:0005634	cellular_component	nucleus
C50B6.4	GO:0016021	cellular_component	integral to membrane
C50B8.2	GO:0005622	cellular_component	intracellular
C50C3.6	GO:0005681	cellular_component	spliceosome
C50C3.9	GO:0016020	cellular_component	membrane
C50D2.2	GO:0016020	cellular_component	membrane
C50D2.2	GO:0016021	cellular_component	integral to membrane
C50D2.4	GO:0016021	cellular_component	integral to membrane
C50D2.9	GO:0016021	cellular_component	integral to membrane
C50E3.16	GO:0016020	cellular_component	membrane
C50E3.16	GO:0016021	cellular_component	integral to membrane
C50F2.3	GO:0005622	cellular_component	intracellular
C50F4.13	GO:0000786	cellular_component	nucleosome
C50F4.13	GO:0005622	cellular_component	intracellular
C50F4.13	GO:0005634	cellular_component	nucleus
C50F4.14	GO:0016021	cellular_component	integral to membrane
C50F4.2	GO:0005737	cellular_component	cytoplasm
C50F4.2	GO:0005945	cellular_component	6-phosphofructokinase complex
C50F4.5	GO:0000786	cellular_component	nucleosome
C50F4.5	GO:0005622	cellular_component	intracellular
C50F4.5	GO:0005634	cellular_component	nucleus
C50F4.7	GO:0000786	cellular_component	nucleosome
C50F4.7	GO:0005622	cellular_component	intracellular
C50F4.7	GO:0005634	cellular_component	nucleus
C50H11.15	GO:0016021	cellular_component	integral to membrane
C50H2.1	GO:0005622	cellular_component	intracellular
C50H2.1	GO:0005840	cellular_component	ribosome
C50H2.1	GO:0016021	cellular_component	integral to membrane
C51E3.6	GO:0016020	cellular_component	membrane
C51E3.6	GO:0016021	cellular_component	integral to membrane
C51E3.7	GO:0030424	cellular_component	axon
C52A11.4	GO:0016021	cellular_component	integral to membrane
C52B11.2	GO:0008076	cellular_component	voltage-gated potassium channel complex
C52B11.2	GO:0016020	cellular_component	membrane
C52B11.3	GO:0016021	cellular_component	integral to membrane
C52B9.4	GO:0016021	cellular_component	integral to membrane
C52B9.6	GO:0016020	cellular_component	membrane
C52B9.6	GO:0016021	cellular_component	integral to membrane
C52D10.12	GO:0016021	cellular_component	integral to membrane
C52D10.13	GO:0016021	cellular_component	integral to membrane
C52E12.1	GO:0005622	cellular_component	intracellular
C52E12.2	GO:0030424	cellular_component	axon
C52E12.2	GO:0030425	cellular_component	dendrite
C52E12.3	GO:0005737	cellular_component	cytoplasm
C52E12.3	GO:0016021	cellular_component	integral to membrane
C52E4.1	GO:0005634	cellular_component	nucleus
C52E4.4	GO:0005737	cellular_component	cytoplasm
C52E4.5	GO:0016020	cellular_component	membrane
C52E4.5	GO:0016021	cellular_component	integral to membrane
C53A5.13	GO:0016021	cellular_component	integral to membrane
C53A5.2	GO:0016021	cellular_component	integral to membrane
C53A5.3	GO:0000118	cellular_component	histone deacetylase complex
C53A5.3	GO:0005634	cellular_component	nucleus
C53A5.3	GO:0005737	cellular_component	cytoplasm
C53A5.3	GO:0016581	cellular_component	NuRD complex
C53A5.3	GO:0043073	cellular_component	germ cell nucleus
C53A5.5	GO:0016021	cellular_component	integral to membrane
C53B4.3	GO:0016021	cellular_component	integral to membrane
C53B4.4	GO:0016021	cellular_component	integral to membrane
C53B4.5	GO:0016021	cellular_component	integral to membrane
C53B4.6	GO:0016021	cellular_component	integral to membrane
C53B4.7	GO:0005622	cellular_component	intracellular
C53B7.4	GO:0000276	cellular_component	mitochondrial proton-transporting ATP synthase complex, coupling factor F(o)
C53B7.4	GO:0005739	cellular_component	mitochondrion
C53B7.4	GO:0005929	cellular_component	cilium
C53C11.3	GO:0016020	cellular_component	membrane
C53C11.3	GO:0016021	cellular_component	integral to membrane
C53C7.1	GO:0016021	cellular_component	integral to membrane
C53C9.3	GO:0008076	cellular_component	voltage-gated potassium channel complex
C53C9.3	GO:0016020	cellular_component	membrane
C53C9.3	GO:0016021	cellular_component	integral to membrane
C53D5.1	GO:0016021	cellular_component	integral to membrane
C53D5.2	GO:0016021	cellular_component	integral to membrane
C53D5.5	GO:0016021	cellular_component	integral to membrane
C53D6.2	GO:0005576	cellular_component	extracellular region
C53H9.1	GO:0005622	cellular_component	intracellular
C53H9.1	GO:0005840	cellular_component	ribosome
C53H9.2	GO:0005622	cellular_component	intracellular
C53H9.2	GO:0016021	cellular_component	integral to membrane
C54A12.1	GO:0016020	cellular_component	membrane
C54A12.1	GO:0016021	cellular_component	integral to membrane
C54A12.4	GO:0005622	cellular_component	intracellular
C54C6.1	GO:0005622	cellular_component	intracellular
C54C6.1	GO:0005840	cellular_component	ribosome
C54C6.2	GO:0005874	cellular_component	microtubule
C54C6.2	GO:0043234	cellular_component	protein complex
C54C8.11	GO:0016020	cellular_component	membrane
C54C8.11	GO:0016021	cellular_component	integral to membrane
C54C8.2	GO:0016021	cellular_component	integral to membrane
C54C8.3	GO:0016020	cellular_component	membrane
C54C8.5	GO:0016020	cellular_component	membrane
C54C8.5	GO:0016021	cellular_component	integral to membrane
C54D1.1	GO:0016021	cellular_component	integral to membrane
C54D1.5	GO:0005578	cellular_component	proteinaceous extracellular matrix
C54D1.5	GO:0031012	cellular_component	extracellular matrix
C54D1.6	GO:0005624	cellular_component	membrane fraction
C54D1.6	GO:0005625	cellular_component	soluble fraction
C54D1.6	GO:0005634	cellular_component	nucleus
C54D1.6	GO:0005737	cellular_component	cytoplasm
C54D1.6	GO:0005913	cellular_component	cell-cell adherens junction
C54D10.1	GO:0016021	cellular_component	integral to membrane
C54D10.2	GO:0016021	cellular_component	integral to membrane
C54D2.5	GO:0005891	cellular_component	voltage-gated calcium channel complex
C54D2.5	GO:0016020	cellular_component	membrane
C54D2.5	GO:0016021	cellular_component	integral to membrane
C54E4.5	GO:0005737	cellular_component	cytoplasm
C54F6.13	GO:0016021	cellular_component	integral to membrane
C54F6.4	GO:0016020	cellular_component	membrane
C54F6.4	GO:0016021	cellular_component	integral to membrane
C54G10.2	GO:0005663	cellular_component	DNA replication factor C complex
C54G10.3	GO:0016020	cellular_component	membrane
C54G10.3	GO:0016021	cellular_component	integral to membrane
C54G10.4	GO:0016020	cellular_component	membrane
C54G4.4	GO:0016021	cellular_component	integral to membrane
C54G4.6	GO:0005737	cellular_component	cytoplasm
C54G4.8	GO:0016021	cellular_component	integral to membrane
C54G7.2	GO:0016021	cellular_component	integral to membrane
C54G7.4	GO:0005932	cellular_component	microtubule basal body
C54G7.4	GO:0035085	cellular_component	cilium axoneme
C54H2.3	GO:0005622	cellular_component	intracellular
C54H2.5	GO:0016021	cellular_component	integral to membrane
C55B7.1	GO:0043186	cellular_component	P granule
C55B7.12	GO:0005622	cellular_component	intracellular
C55B7.12	GO:0005634	cellular_component	nucleus
C55B7.2	GO:0005634	cellular_component	nucleus
C55B7.2	GO:0005795	cellular_component	Golgi stack
C55B7.2	GO:0016021	cellular_component	integral to membrane
C55B7.5	GO:0016272	cellular_component	prefoldin complex
C55B7.9	GO:0016592	cellular_component	Srb-mediator complex
C55C3.1	GO:0016021	cellular_component	integral to membrane
C56C10.13	GO:0016021	cellular_component	integral to membrane
C56C10.8	GO:0005739	cellular_component	mitochondrion
C56E6.2	GO:0005622	cellular_component	intracellular
C56E6.2	GO:0005634	cellular_component	nucleus
C56E6.2	GO:0005737	cellular_component	cytoplasm
C56E6.5	GO:0016021	cellular_component	integral to membrane
C56G2.1	GO:0016021	cellular_component	integral to membrane
C56G2.6	GO:0016021	cellular_component	integral to membrane
C56G2.7	GO:0005634	cellular_component	nucleus
C56G2.7	GO:0005737	cellular_component	cytoplasm
C56G7.3	GO:0005856	cellular_component	cytoskeleton
CD4.3	GO:0005622	cellular_component	intracellular
CD4.3	GO:0005840	cellular_component	ribosome
CD4.6	GO:0005839	cellular_component	proteasome core complex
CD4.6	GO:0019773	cellular_component	proteasome core complex, alpha-subunit complex
cTel55X.1	GO:0016021	cellular_component	integral to membrane
D1005.1	GO:0005737	cellular_component	cytoplasm
D1005.3	GO:0016021	cellular_component	integral to membrane
D1007.1	GO:0005634	cellular_component	nucleus
D1007.12	GO:0005622	cellular_component	intracellular
D1007.12	GO:0005840	cellular_component	ribosome
D1007.15	GO:0016021	cellular_component	integral to membrane
D1007.5	GO:0016021	cellular_component	integral to membrane
D1009.1	GO:0016021	cellular_component	integral to membrane
D1009.2	GO:0005634	cellular_component	nucleus
D1009.3	GO:0016021	cellular_component	integral to membrane
D1009.5	GO:0035085	cellular_component	cilium axoneme
D1014.3	GO:0005783	cellular_component	endoplasmic reticulum
D1014.3	GO:0005794	cellular_component	Golgi apparatus
D1022.1	GO:0016021	cellular_component	integral to membrane
D1025.2	GO:0005739	cellular_component	mitochondrion
D1025.2	GO:0005960	cellular_component	glycine cleavage complex
D1037.1	GO:0005622	cellular_component	intracellular
D1037.2	GO:0016021	cellular_component	integral to membrane
D1037.4	GO:0005622	cellular_component	intracellular
D1037.4	GO:0005634	cellular_component	nucleus
D1037.4	GO:0005737	cellular_component	cytoplasm
D1044.3	GO:0016021	cellular_component	integral to membrane
D1046.3	GO:0016020	cellular_component	membrane
D1046.3	GO:0016021	cellular_component	integral to membrane
D1046.5	GO:0016021	cellular_component	integral to membrane
D1053.1	GO:0005737	cellular_component	cytoplasm
D1054.2	GO:0005839	cellular_component	proteasome core complex
D1054.2	GO:0019773	cellular_component	proteasome core complex, alpha-subunit complex
D1065.1	GO:0016021	cellular_component	integral to membrane
D1073.1	GO:0016021	cellular_component	integral to membrane
D1081.2	GO:0005634	cellular_component	nucleus
D2013.1	GO:0005622	cellular_component	intracellular
D2013.10	GO:0016021	cellular_component	integral to membrane
D2013.8	GO:0016020	cellular_component	membrane
D2013.8	GO:0016021	cellular_component	integral to membrane
D2021.2	GO:0016021	cellular_component	integral to membrane
D2023.1	GO:0016021	cellular_component	integral to membrane
D2023.2	GO:0005737	cellular_component	cytoplasm
D2023.7	GO:0016021	cellular_component	integral to membrane
D2024.3	GO:0016021	cellular_component	integral to membrane
D2024.6	GO:0008290	cellular_component	F-actin capping protein complex
D2024.7	GO:0005739	cellular_component	mitochondrion
D2024.7	GO:0030288	cellular_component	outer membrane-bounded periplasmic space
D2030.1	GO:0016020	cellular_component	membrane
D2030.1	GO:0016021	cellular_component	integral to membrane
D2030.2	GO:0005622	cellular_component	intracellular
D2030.4	GO:0005739	cellular_component	mitochondrion
D2030.6	GO:0043186	cellular_component	P granule
D2030.9	GO:0005634	cellular_component	nucleus
D2045.1	GO:0005737	cellular_component	cytoplasm
D2045.6	GO:0031461	cellular_component	cullin-RING ubiquitin ligase complex
D2045.8	GO:0008076	cellular_component	voltage-gated potassium channel complex
D2045.8	GO:0016020	cellular_component	membrane
D2085.4	GO:0005622	cellular_component	intracellular
D2085.6	GO:0016021	cellular_component	integral to membrane
D2089.2	GO:0016021	cellular_component	integral to membrane
D2089.4	GO:0005634	cellular_component	nucleus
D2092.1	GO:0016021	cellular_component	integral to membrane
D2092.3	GO:0016020	cellular_component	membrane
D2092.3	GO:0016021	cellular_component	integral to membrane
D2092.3	GO:0045202	cellular_component	synapse
D2092.3	GO:0045211	cellular_component	postsynaptic membrane
D2092.4	GO:0016021	cellular_component	integral to membrane
D2092.5	GO:0016021	cellular_component	integral to membrane
D2096.2	GO:0016021	cellular_component	integral to membrane
D2096.4	GO:0005737	cellular_component	cytoplasm
D2096.4	GO:0016021	cellular_component	integral to membrane
D2096.8	GO:0005634	cellular_component	nucleus
DC2.3	GO:0005801	cellular_component	cis-Golgi network
DC2.3	GO:0016021	cellular_component	integral to membrane
DH11.3	GO:0016021	cellular_component	integral to membrane
DY3.1	GO:0042719	cellular_component	mitochondrial intermembrane space protein transporter complex
DY3.2	GO:0005635	cellular_component	nuclear envelope
DY3.2	GO:0005638	cellular_component	lamin filament
DY3.2	GO:0034399	cellular_component	nuclear periphery
DY3.3	GO:0005634	cellular_component	nucleus
DY3.7	GO:0016021	cellular_component	integral to membrane
E01A2.10	GO:0016021	cellular_component	integral to membrane
E01A2.7	GO:0016021	cellular_component	integral to membrane
E01H11.1	GO:0005625	cellular_component	soluble fraction
E01H11.1	GO:0005626	cellular_component	insoluble fraction
E01H11.1	GO:0016021	cellular_component	integral to membrane
E01H11.1	GO:0043005	cellular_component	neuron projection
E01H11.1	GO:0043025	cellular_component	cell soma
E02A10.1	GO:0005622	cellular_component	intracellular
E02A10.1	GO:0005840	cellular_component	ribosome
E02A10.2	GO:0016021	cellular_component	integral to membrane
E02D9.1	GO:0016021	cellular_component	integral to membrane
E02H1.2	GO:0005622	cellular_component	intracellular
E02H4.1	GO:0016020	cellular_component	membrane
E02H4.1	GO:0016021	cellular_component	integral to membrane
E03A3.3	GO:0000786	cellular_component	nucleosome
E03A3.4	GO:0000786	cellular_component	nucleosome
E03G2.2	GO:0016021	cellular_component	integral to membrane
E03H4.10	GO:0016021	cellular_component	integral to membrane
E03H4.11	GO:0016020	cellular_component	membrane
E03H4.12	GO:0016020	cellular_component	membrane
E03H4.12	GO:0016021	cellular_component	integral to membrane
E03H4.3	GO:0016020	cellular_component	membrane
E03H4.8	GO:0030117	cellular_component	membrane coat
E04A4.5	GO:0005743	cellular_component	mitochondrial inner membrane
E04A4.5	GO:0005744	cellular_component	mitochondrial inner membrane presequence translocase complex
E04A4.5	GO:0016021	cellular_component	integral to membrane
E04A4.6	GO:0016021	cellular_component	integral to membrane
E04A4.8	GO:0005622	cellular_component	intracellular
E04A4.8	GO:0005840	cellular_component	ribosome
E04F6.11	GO:0005886	cellular_component	plasma membrane
E04F6.11	GO:0016020	cellular_component	membrane
E04F6.11	GO:0016021	cellular_component	integral to membrane
EEED8.7	GO:0005634	cellular_component	nucleus
EEED8.9	GO:0005737	cellular_component	cytoplasm
EEED8.9	GO:0005739	cellular_component	mitochondrion
EGAP1.3	GO:0009986	cellular_component	cell surface
EGAP1.3	GO:0031012	cellular_component	extracellular matrix
EGAP2.3	GO:0016021	cellular_component	integral to membrane
EGAP7.1	GO:0016021	cellular_component	integral to membrane
F01D4.1	GO:0016021	cellular_component	integral to membrane
F01D4.2	GO:0016021	cellular_component	integral to membrane
F01D4.4	GO:0016021	cellular_component	integral to membrane
F01D4.4	GO:0030424	cellular_component	axon
F01D4.4	GO:0031410	cellular_component	cytoplasmic vesicle
F01D4.4	GO:0043025	cellular_component	cell soma
F01D4.9	GO:0016021	cellular_component	integral to membrane
F01D5.9	GO:0016021	cellular_component	integral to membrane
F01E11.5	GO:0016021	cellular_component	integral to membrane
F01F1.10	GO:0005737	cellular_component	cytoplasm
F01F1.7	GO:0005634	cellular_component	nucleus
F01F1.9	GO:0005773	cellular_component	vacuole
F01G10.3	GO:0005737	cellular_component	cytoplasm
F01G10.8	GO:0005622	cellular_component	intracellular
F01G12.1	GO:0016021	cellular_component	integral to membrane
F01G12.5	GO:0005581	cellular_component	collagen
F01G12.5	GO:0005604	cellular_component	basement membrane
F01G4.1	GO:0005634	cellular_component	nucleus
F01G4.5	GO:0016021	cellular_component	integral to membrane
F01G4.6	GO:0016020	cellular_component	membrane
F01G4.6	GO:0016021	cellular_component	integral to membrane
F02A9.6	GO:0005737	cellular_component	cytoplasm
F02A9.6	GO:0005886	cellular_component	plasma membrane
F02A9.6	GO:0012505	cellular_component	endomembrane system
F02A9.6	GO:0016020	cellular_component	membrane
F02A9.6	GO:0016021	cellular_component	integral to membrane
F02A9.6	GO:0016328	cellular_component	lateral plasma membrane
F02C12.5	GO:0016021	cellular_component	integral to membrane
F02C9.3	GO:0016020	cellular_component	membrane
F02C9.3	GO:0016021	cellular_component	integral to membrane
F02D10.5	GO:0016020	cellular_component	membrane
F02D10.5	GO:0016021	cellular_component	integral to membrane
F02D8.3	GO:0035085	cellular_component	cilium axoneme
F02D8.3	GO:0044441	cellular_component	cilium part
F02E11.1	GO:0016020	cellular_component	membrane
F02E11.1	GO:0016021	cellular_component	integral to membrane
F02E11.5	GO:0005576	cellular_component	extracellular region
F02E8.1	GO:0000276	cellular_component	mitochondrial proton-transporting ATP synthase complex, coupling factor F(o)
F02E8.2	GO:0016021	cellular_component	integral to membrane
F02E8.3	GO:0005623	cellular_component	cell
F02E8.3	GO:0030117	cellular_component	membrane coat
F02E8.5	GO:0016021	cellular_component	integral to membrane
F02E8.6	GO:0005764	cellular_component	lysosome
F02E8.6	GO:0005770	cellular_component	late endosome
F02E8.6	GO:0016020	cellular_component	membrane
F02E8.6	GO:0016021	cellular_component	integral to membrane
F02E9.2	GO:0005625	cellular_component	soluble fraction
F02E9.2	GO:0005737	cellular_component	cytoplasm
F02E9.4	GO:0005634	cellular_component	nucleus
F02E9.7	GO:0016021	cellular_component	integral to membrane
F02E9.9	GO:0005737	cellular_component	cytoplasm
F02G3.1	GO:0016020	cellular_component	membrane
F02G3.1	GO:0016021	cellular_component	integral to membrane
F07A11.2	GO:0005737	cellular_component	cytoplasm
F07A5.3	GO:0016020	cellular_component	membrane
F07A5.3	GO:0016021	cellular_component	integral to membrane
F07A5.7	GO:0016459	cellular_component	myosin complex
F07A5.7	GO:0032982	cellular_component	myosin filament
F07B10.1	GO:0005737	cellular_component	cytoplasm
F07B10.1	GO:0016020	cellular_component	membrane
F07B10.1	GO:0016021	cellular_component	integral to membrane
F07B10.5	GO:0016020	cellular_component	membrane
F07B10.5	GO:0016021	cellular_component	integral to membrane
F07B10.5	GO:0045211	cellular_component	postsynaptic membrane
F07B7.10	GO:0000786	cellular_component	nucleosome
F07B7.10	GO:0005622	cellular_component	intracellular
F07B7.10	GO:0005634	cellular_component	nucleus
F07B7.11	GO:0000786	cellular_component	nucleosome
F07B7.11	GO:0005622	cellular_component	intracellular
F07B7.11	GO:0005634	cellular_component	nucleus
F07B7.3	GO:0000786	cellular_component	nucleosome
F07B7.3	GO:0005622	cellular_component	intracellular
F07B7.3	GO:0005634	cellular_component	nucleus
F07B7.4	GO:0000786	cellular_component	nucleosome
F07B7.4	GO:0005622	cellular_component	intracellular
F07B7.4	GO:0005634	cellular_component	nucleus
F07B7.5	GO:0000786	cellular_component	nucleosome
F07B7.9	GO:0000786	cellular_component	nucleosome
F07B7.9	GO:0005622	cellular_component	intracellular
F07B7.9	GO:0005634	cellular_component	nucleus
F07C3.1	GO:0016020	cellular_component	membrane
F07C3.1	GO:0016021	cellular_component	integral to membrane
F07C3.4	GO:0030424	cellular_component	axon
F07C3.4	GO:0045202	cellular_component	synapse
F07C3.7	GO:0016020	cellular_component	membrane
F07C3.7	GO:0016021	cellular_component	integral to membrane
F07D10.1	GO:0005622	cellular_component	intracellular
F07D10.1	GO:0005840	cellular_component	ribosome
F07F6.6	GO:0005887	cellular_component	integral to plasma membrane
F07F6.6	GO:0016020	cellular_component	membrane
F07F6.6	GO:0016021	cellular_component	integral to membrane
F07F6.6	GO:0030288	cellular_component	outer membrane-bounded periplasmic space
F07F6.6	GO:0043005	cellular_component	neuron projection
F07F6.6	GO:0045202	cellular_component	synapse
F07F6.7	GO:0005576	cellular_component	extracellular region
F07F6.7	GO:0016021	cellular_component	integral to membrane
F07H5.2	GO:0016012	cellular_component	sarcoglycan complex
F07H5.2	GO:0016021	cellular_component	integral to membrane
F08A10.1	GO:0016020	cellular_component	membrane
F08A10.1	GO:0016021	cellular_component	integral to membrane
F08A8.1	GO:0005777	cellular_component	peroxisome
F08A8.2	GO:0005777	cellular_component	peroxisome
F08A8.3	GO:0005777	cellular_component	peroxisome
F08A8.4	GO:0005777	cellular_component	peroxisome
F08B1.1	GO:0005634	cellular_component	nucleus
F08B1.1	GO:0005737	cellular_component	cytoplasm
F08B1.2	GO:0016021	cellular_component	integral to membrane
F08B12.1	GO:0016021	cellular_component	integral to membrane
F08B12.2	GO:0005778	cellular_component	peroxisomal membrane
F08B12.2	GO:0016021	cellular_component	integral to membrane
F08B12.3	GO:0016020	cellular_component	membrane
F08B12.3	GO:0016021	cellular_component	integral to membrane
F08B12.3	GO:0030424	cellular_component	axon
F08B4.2	GO:0005886	cellular_component	plasma membrane
F08B4.2	GO:0016020	cellular_component	membrane
F08B4.2	GO:0016021	cellular_component	integral to membrane
F08B4.5	GO:0005634	cellular_component	nucleus
F08B6.2	GO:0005834	cellular_component	heterotrimeric G-protein complex
F08C6.4	GO:0016020	cellular_component	membrane
F08C6.4	GO:0016021	cellular_component	integral to membrane
F08C6.6	GO:0016021	cellular_component	integral to membrane
F08C6.7	GO:0005622	cellular_component	intracellular
F08C6.7	GO:0005634	cellular_component	nucleus
F08C6.7	GO:0031430	cellular_component	M band
F08D12.1	GO:0048500	cellular_component	signal recognition particle
F08F1.5	GO:0005886	cellular_component	plasma membrane
F08F1.5	GO:0016021	cellular_component	integral to membrane
F08F1.7	GO:0016021	cellular_component	integral to membrane
F08F1.8	GO:0005737	cellular_component	cytoplasm
F08F3.3	GO:0016020	cellular_component	membrane
F08F3.3	GO:0016021	cellular_component	integral to membrane
F08F3.7	GO:0016021	cellular_component	integral to membrane
F08F8.2	GO:0016021	cellular_component	integral to membrane
F08F8.3	GO:0005871	cellular_component	kinesin complex
F08F8.3	GO:0030993	cellular_component	axonemal heterotrimeric kinesin-II complex
F08F8.8	GO:0016021	cellular_component	integral to membrane
F08G12.1	GO:0005622	cellular_component	intracellular
F08G2.1	GO:0000786	cellular_component	nucleosome
F08G2.1	GO:0005622	cellular_component	intracellular
F08G2.1	GO:0005634	cellular_component	nucleus
F08G2.2	GO:0000786	cellular_component	nucleosome
F08G2.2	GO:0005622	cellular_component	intracellular
F08G2.2	GO:0005634	cellular_component	nucleus
F08G2.3	GO:0000786	cellular_component	nucleosome
F08G5.2	GO:0016021	cellular_component	integral to membrane
F08G5.4	GO:0016021	cellular_component	integral to membrane
F09A5.1	GO:0016021	cellular_component	integral to membrane
F09A5.4	GO:0016021	cellular_component	integral to membrane
F09B12.2	GO:0016021	cellular_component	integral to membrane
F09B12.3	GO:0016021	cellular_component	integral to membrane
F09B9.3	GO:0016021	cellular_component	integral to membrane
F09B9.5	GO:0005576	cellular_component	extracellular region
F09C3.1	GO:0005622	cellular_component	intracellular
F09C8.1	GO:0016021	cellular_component	integral to membrane
F09E5.1	GO:0005625	cellular_component	soluble fraction
F09E5.1	GO:0005626	cellular_component	insoluble fraction
F09E5.1	GO:0005938	cellular_component	cell cortex
F09E5.1	GO:0016324	cellular_component	apical plasma membrane
F09E5.1	GO:0030864	cellular_component	cortical actin cytoskeleton
F09E5.11	GO:0016021	cellular_component	integral to membrane
F09E5.15	GO:0005737	cellular_component	cytoplasm
F09E5.3	GO:0005737	cellular_component	cytoplasm
F09E5.4	GO:0016020	cellular_component	membrane
F09E5.4	GO:0016021	cellular_component	integral to membrane
F09E8.2	GO:0016021	cellular_component	integral to membrane
F09E8.5	GO:0005576	cellular_component	extracellular region
F09E8.7	GO:0016020	cellular_component	membrane
F09E8.7	GO:0016021	cellular_component	integral to membrane
F09E8.7	GO:0043005	cellular_component	neuron projection
F09E8.7	GO:0043025	cellular_component	cell soma
F09E8.7	GO:0045211	cellular_component	postsynaptic membrane
F09G2.3	GO:0016020	cellular_component	membrane
F09G2.3	GO:0016021	cellular_component	integral to membrane
F09G2.5	GO:0016020	cellular_component	membrane
F09G2.5	GO:0016021	cellular_component	integral to membrane
F09G2.5	GO:0045211	cellular_component	postsynaptic membrane
F09G2.6	GO:0016021	cellular_component	integral to membrane
F09G2.8	GO:0016021	cellular_component	integral to membrane
F09G8.3	GO:0005622	cellular_component	intracellular
F09G8.3	GO:0005840	cellular_component	ribosome
F09G8.4	GO:0016020	cellular_component	membrane
F09G8.4	GO:0016021	cellular_component	integral to membrane
F09G8.5	GO:0016021	cellular_component	integral to membrane
F09G8.6	GO:0016021	cellular_component	integral to membrane
F10B5.1	GO:0005622	cellular_component	intracellular
F10B5.1	GO:0005840	cellular_component	ribosome
F10B5.9	GO:0016021	cellular_component	integral to membrane
F10C1.5	GO:0005634	cellular_component	nucleus
F10C2.5	GO:0016020	cellular_component	membrane
F10C2.6	GO:0005737	cellular_component	cytoplasm
F10C5.1	GO:0005680	cellular_component	anaphase-promoting complex
F10C5.2	GO:0016021	cellular_component	integral to membrane
F10D2.11	GO:0016021	cellular_component	integral to membrane
F10D2.2	GO:0016021	cellular_component	integral to membrane
F10D2.5	GO:0016021	cellular_component	integral to membrane
F10D2.6	GO:0016021	cellular_component	integral to membrane
F10D2.7	GO:0016021	cellular_component	integral to membrane
F10D2.9	GO:0005789	cellular_component	endoplasmic reticulum membrane
F10D2.9	GO:0016021	cellular_component	integral to membrane
F10D7.2	GO:0016021	cellular_component	integral to membrane
F10E7.2	GO:0016021	cellular_component	integral to membrane
F10E7.3	GO:0016021	cellular_component	integral to membrane
F10E7.5	GO:0005622	cellular_component	intracellular
F10E7.7	GO:0005622	cellular_component	intracellular
F10E7.7	GO:0005840	cellular_component	ribosome
F10E7.9	GO:0016020	cellular_component	membrane
F10E7.9	GO:0016021	cellular_component	integral to membrane
F10E9.6	GO:0031941	cellular_component	filamentous actin
F10F2.1	GO:0005737	cellular_component	cytoplasm
F10F2.1	GO:0048471	cellular_component	perinuclear region of cytoplasm
F10G7.1	GO:0005634	cellular_component	nucleus
F10G7.2	GO:0005634	cellular_component	nucleus
F10G7.2	GO:0005829	cellular_component	cytosol
F10G7.2	GO:0016442	cellular_component	RNA-induced silencing complex
F10G7.3	GO:0005634	cellular_component	nucleus
F10G7.4	GO:0000228	cellular_component	nuclear chromosome
F10G7.4	GO:0005634	cellular_component	nucleus
F10G7.5	GO:0016021	cellular_component	integral to membrane
F10G8.7	GO:0005634	cellular_component	nucleus
F11A1.3	GO:0005634	cellular_component	nucleus
F11A10.3	GO:0005634	cellular_component	nucleus
F11A10.3	GO:0005730	cellular_component	nucleolus
F11A10.5	GO:0016021	cellular_component	integral to membrane
F11A10.6	GO:0016021	cellular_component	integral to membrane
F11A5.10	GO:0016020	cellular_component	membrane
F11A5.10	GO:0016021	cellular_component	integral to membrane
F11A5.10	GO:0045211	cellular_component	postsynaptic membrane
F11A5.12	GO:0016021	cellular_component	integral to membrane
F11C1.3	GO:0016020	cellular_component	membrane
F11C1.3	GO:0016021	cellular_component	integral to membrane
F11C1.5	GO:0005622	cellular_component	intracellular
F11C1.5	GO:0005840	cellular_component	ribosome
F11C1.6	GO:0005634	cellular_component	nucleus
F11C3.2	GO:0016021	cellular_component	integral to membrane
F11C3.3	GO:0005859	cellular_component	muscle myosin complex
F11C3.3	GO:0016459	cellular_component	myosin complex
F11C7.1	GO:0016020	cellular_component	membrane
F11C7.1	GO:0016021	cellular_component	integral to membrane
F11C7.1	GO:0045211	cellular_component	postsynaptic membrane
F11C7.3	GO:0005576	cellular_component	extracellular region
F11C7.4	GO:0005737	cellular_component	cytoplasm
F11C7.4	GO:0016021	cellular_component	integral to membrane
F11D5.3	GO:0016021	cellular_component	integral to membrane
F11E6.1	GO:0005764	cellular_component	lysosome
F11E6.5	GO:0016021	cellular_component	integral to membrane
F11E6.8	GO:0016021	cellular_component	integral to membrane
F11G11.12	GO:0016021	cellular_component	integral to membrane
F11G11.9	GO:0016021	cellular_component	integral to membrane
F11H8.1	GO:0005634	cellular_component	nucleus
F11H8.1	GO:0005737	cellular_component	cytoplasm
F11H8.2	GO:0016020	cellular_component	membrane
F11H8.2	GO:0016021	cellular_component	integral to membrane
F11H8.2	GO:0045211	cellular_component	postsynaptic membrane
F11H8.4	GO:0005826	cellular_component	contractile ring
F11H8.4	GO:0009898	cellular_component	internal side of plasma membrane
F11H8.4	GO:0032154	cellular_component	cleavage furrow
F12B6.1	GO:0016021	cellular_component	integral to membrane
F12F3.1	GO:0008076	cellular_component	voltage-gated potassium channel complex
F12F3.1	GO:0016020	cellular_component	membrane
F12F3.1	GO:0016021	cellular_component	integral to membrane
F12F6.3	GO:0016020	cellular_component	membrane
F12F6.5	GO:0005622	cellular_component	intracellular
F12F6.6	GO:0030127	cellular_component	COPII vesicle coat
F13A7.10	GO:0005737	cellular_component	cytoplasm
F13B10.1	GO:0030424	cellular_component	axon
F13B10.1	GO:0031224	cellular_component	intrinsic to membrane
F13B10.2	GO:0005622	cellular_component	intracellular
F13B10.2	GO:0005840	cellular_component	ribosome
F13B9.5	GO:0016020	cellular_component	membrane
F13B9.8	GO:0016021	cellular_component	integral to membrane
F13D11.1	GO:0016021	cellular_component	integral to membrane
F13D11.2	GO:0005622	cellular_component	intracellular
F13D12.2	GO:0005737	cellular_component	cytoplasm
F13D12.6	GO:0016021	cellular_component	integral to membrane
F13D12.7	GO:0005834	cellular_component	heterotrimeric G-protein complex
F13E6.6	GO:0005622	cellular_component	intracellular
F13G3.1	GO:0005622	cellular_component	intracellular
F13G3.11	GO:0005622	cellular_component	intracellular
F13G3.11	GO:0005840	cellular_component	ribosome
F13G3.5	GO:0005737	cellular_component	cytoplasm
F13G3.7	GO:0016020	cellular_component	membrane
F13G3.7	GO:0016021	cellular_component	integral to membrane
F13G3.9	GO:0005634	cellular_component	nucleus
F13G3.9	GO:0016021	cellular_component	integral to membrane
F13H10.3	GO:0016021	cellular_component	integral to membrane
F13H10.4	GO:0016021	cellular_component	integral to membrane
F13H10.5	GO:0016021	cellular_component	integral to membrane
F13H6.1	GO:0005622	cellular_component	intracellular
F13H8.11	GO:0016021	cellular_component	integral to membrane
F13H8.4	GO:0016021	cellular_component	integral to membrane
F14B4.1	GO:0016020	cellular_component	membrane
F14B4.3	GO:0005634	cellular_component	nucleus
F14B6.4	GO:0016020	cellular_component	membrane
F14B6.4	GO:0016021	cellular_component	integral to membrane
F14B6.6	GO:0016020	cellular_component	membrane
F14B8.1	GO:0016021	cellular_component	integral to membrane
F14B8.7	GO:0016021	cellular_component	integral to membrane
F14D12.2	GO:0005634	cellular_component	nucleus
F14D12.2	GO:0005737	cellular_component	cytoplasm
F14D12.2	GO:0005912	cellular_component	adherens junction
F14D12.2	GO:0008305	cellular_component	integrin complex
F14D12.2	GO:0055120	cellular_component	striated muscle dense body
F14D12.4	GO:0016020	cellular_component	membrane
F14D12.4	GO:0016021	cellular_component	integral to membrane
F14D12.4	GO:0032589	cellular_component	neuron projection membrane
F14D12.4	GO:0043005	cellular_component	neuron projection
F14D12.5	GO:0005929	cellular_component	cilium
F14D12.5	GO:0016020	cellular_component	membrane
F14D12.5	GO:0016021	cellular_component	integral to membrane
F14D12.5	GO:0016323	cellular_component	basolateral plasma membrane
F14D12.6	GO:0016021	cellular_component	integral to membrane
F14D7.6	GO:0016021	cellular_component	integral to membrane
F14E5.2	GO:0016020	cellular_component	membrane
F14E5.2	GO:0016021	cellular_component	integral to membrane
F14E5.3	GO:0016021	cellular_component	integral to membrane
F14E5.6	GO:0016021	cellular_component	integral to membrane
F14F11.1	GO:0008076	cellular_component	voltage-gated potassium channel complex
F14F11.1	GO:0016020	cellular_component	membrane
F14F11.1	GO:0016021	cellular_component	integral to membrane
F14F3.1	GO:0005634	cellular_component	nucleus
F14F3.1	GO:0005737	cellular_component	cytoplasm
F14F3.3	GO:0005792	cellular_component	microsome
F14F3.3	GO:0016021	cellular_component	integral to membrane
F14F4.1	GO:0016021	cellular_component	integral to membrane
F14F4.3	GO:0016021	cellular_component	integral to membrane
F14F7.2	GO:0016021	cellular_component	integral to membrane
F14F7.3	GO:0016021	cellular_component	integral to membrane
F14H12.1	GO:0016021	cellular_component	integral to membrane
F14H3.10	GO:0016021	cellular_component	integral to membrane
F14H3.2	GO:0016021	cellular_component	integral to membrane
F14H8.6	GO:0016020	cellular_component	membrane
F14H8.6	GO:0016021	cellular_component	integral to membrane
F15A2.1	GO:0016021	cellular_component	integral to membrane
F15A2.2	GO:0016021	cellular_component	integral to membrane
F15A2.6	GO:0030424	cellular_component	axon
F15A2.6	GO:0030425	cellular_component	dendrite
F15A8.5	GO:0016021	cellular_component	integral to membrane
F15B10.1	GO:0000139	cellular_component	Golgi membrane
F15B10.1	GO:0016020	cellular_component	membrane
F15B10.1	GO:0016021	cellular_component	integral to membrane
F15B9.7	GO:0005886	cellular_component	plasma membrane
F15B9.7	GO:0016020	cellular_component	membrane
F15B9.7	GO:0016021	cellular_component	integral to membrane
F15C11.1	GO:0005622	cellular_component	intracellular
F15D3.1	GO:0005622	cellular_component	intracellular
F15D3.7	GO:0005743	cellular_component	mitochondrial inner membrane
F15D4.3	GO:0016021	cellular_component	integral to membrane
F15G9.4	GO:0005604	cellular_component	basement membrane
F15H10.1	GO:0016021	cellular_component	integral to membrane
F15H10.2	GO:0016021	cellular_component	integral to membrane
F15H10.3	GO:0005680	cellular_component	anaphase-promoting complex
F16A11.3	GO:0016021	cellular_component	integral to membrane
F16B3.1	GO:0016020	cellular_component	membrane
F16B3.1	GO:0016021	cellular_component	integral to membrane
F16B4.8	GO:0005622	cellular_component	intracellular
F16D3.1	GO:0005874	cellular_component	microtubule
F16D3.1	GO:0043234	cellular_component	protein complex
F16D3.7	GO:0016021	cellular_component	integral to membrane
F16F9.1	GO:0016021	cellular_component	integral to membrane
F16F9.4	GO:0016021	cellular_component	integral to membrane
F16F9.5	GO:0016020	cellular_component	membrane
F16F9.5	GO:0016021	cellular_component	integral to membrane
F16H11.1	GO:0016021	cellular_component	integral to membrane
F16H11.3	GO:0016020	cellular_component	membrane
F16H11.3	GO:0016021	cellular_component	integral to membrane
F16H11.4	GO:0005634	cellular_component	nucleus
F17A2.5	GO:0005634	cellular_component	nucleus
F17A9.3	GO:0005634	cellular_component	nucleus
F17C11.3	GO:0016021	cellular_component	integral to membrane
F17C11.7	GO:0016021	cellular_component	integral to membrane
F17C11.7	GO:0042765	cellular_component	GPI-anchor transamidase complex
F17C11.9	GO:0005853	cellular_component	eukaryotic translation elongation factor 1 complex
F17C8.1	GO:0005886	cellular_component	plasma membrane
F17C8.1	GO:0016021	cellular_component	integral to membrane
F17C8.2	GO:0016021	cellular_component	integral to membrane
F17C8.4	GO:0005622	cellular_component	intracellular
F17E5.1	GO:0030054	cellular_component	cell junction
F17E5.2	GO:0005743	cellular_component	mitochondrial inner membrane
F17E5.2	GO:0016020	cellular_component	membrane
F17E9.1	GO:0016021	cellular_component	integral to membrane
F17E9.10	GO:0000786	cellular_component	nucleosome
F17E9.12	GO:0000786	cellular_component	nucleosome
F17E9.12	GO:0005622	cellular_component	intracellular
F17E9.12	GO:0005634	cellular_component	nucleus
F17E9.13	GO:0000786	cellular_component	nucleosome
F17E9.13	GO:0005622	cellular_component	intracellular
F17E9.13	GO:0005634	cellular_component	nucleus
F17E9.7	GO:0016020	cellular_component	membrane
F17E9.7	GO:0016021	cellular_component	integral to membrane
F17E9.7	GO:0045211	cellular_component	postsynaptic membrane
F17E9.8	GO:0016020	cellular_component	membrane
F17E9.8	GO:0016021	cellular_component	integral to membrane
F17E9.8	GO:0045211	cellular_component	postsynaptic membrane
F17E9.9	GO:0000786	cellular_component	nucleosome
F17E9.9	GO:0005622	cellular_component	intracellular
F17E9.9	GO:0005634	cellular_component	nucleus
F18A1.5	GO:0005634	cellular_component	nucleus
F18A11.1	GO:0005737	cellular_component	cytoplasm
F18A11.5	GO:0008076	cellular_component	voltage-gated potassium channel complex
F18A11.5	GO:0016020	cellular_component	membrane
F18A12.8	GO:0016021	cellular_component	integral to membrane
F18C12.1	GO:0005929	cellular_component	cilium
F18C12.2	GO:0010008	cellular_component	endosome membrane
F18C5.2	GO:0005622	cellular_component	intracellular
F18C5.2	GO:0005634	cellular_component	nucleus
F18C5.2	GO:0005654	cellular_component	nucleoplasm
F18C5.2	GO:0005694	cellular_component	chromosome
F18E2.3	GO:0000785	cellular_component	chromatin
F18E2.3	GO:0000793	cellular_component	condensed chromosome
F18F11.3	GO:0005886	cellular_component	plasma membrane
F18F11.3	GO:0016020	cellular_component	membrane
F18F11.3	GO:0016021	cellular_component	integral to membrane
F18G5.4	GO:0016020	cellular_component	membrane
F18G5.4	GO:0016021	cellular_component	integral to membrane
F18G5.4	GO:0045211	cellular_component	postsynaptic membrane
F18H3.5	GO:0005623	cellular_component	cell
F18H3.5	GO:0016021	cellular_component	integral to membrane
F19B6.4	GO:0016020	cellular_component	membrane
F19B6.4	GO:0016021	cellular_component	integral to membrane
F19D8.1	GO:0016020	cellular_component	membrane
F19D8.1	GO:0016021	cellular_component	integral to membrane
F19H6.4	GO:0016020	cellular_component	membrane
F19H6.4	GO:0016021	cellular_component	integral to membrane
F19H8.3	GO:0005622	cellular_component	intracellular
F19H8.3	GO:0005634	cellular_component	nucleus
F19H8.3	GO:0005737	cellular_component	cytoplasm
F20A1.7	GO:0016020	cellular_component	membrane
F20A1.7	GO:0016021	cellular_component	integral to membrane
[truncated: 4,521 more rows]
