# Supplementary material for: OrthoList: A Compendium of C. elegans Genes with Human Orthologs
Source: PLoS One. 2011 May 25;6(5):e20085. doi: 10.1371/journal.pone.0020085 (PMC3102077; doi:10.1371/journal.pone.0020085)
Supplement: Table S13 — Molecular function (mf) GO annotations of OrthoList. A) Gene-focused pivot report. B) mf-focused pivot report. C) All OrthoList genes with mf GO annotations (5,269/7,633, or ∼69%), and their associated annotations. This is source data for pivot reports in Tables S13A, B. (XLS) [file pone.0020085.s013.xls]

## Sheet: A) gene-focused mf report
Count of GO Term
Gene ID	GO Term	Total
4R79.1	metalloendopeptidase activity	1
	metallopeptidase activity	1
	zinc ion binding	1
4R79.2	GTP binding	1
	GTPase activity	1
	protein binding	1
AC3.5	metallopeptidase activity	1
	zinc ion binding	1
AC3.6	structural constituent of cuticle	1
AC3.7	carbohydrate binding	1
	transferase activity, transferring hexosyl groups	1
AC3.8	carbohydrate binding	1
	transferase activity, transferring hexosyl groups	1
AC7.2	protein binding	1
AH6.2	cation transmembrane transporter activity	1
B0001.4	ATP binding	1
	kinase activity	1
	phosphotransferase activity, alcohol group as acceptor	1
B0024.1	structural constituent of cuticle	1
B0024.11	pseudouridine synthase activity	1
	RNA binding	1
B0024.12	N-acetyltransferase activity	1
B0024.14	insulin-like growth factor binding	1
	serine-type endopeptidase inhibitor activity	1
B0024.15	galactosyltransferase activity	1
B0024.2	structural constituent of cuticle	1
B0024.8	binding	1
B0025.1	1-phosphatidylinositol-3-kinase activity	1
	inositol or phosphatidylinositol kinase activity	1
	phosphotransferase activity, alcohol group as acceptor	1
B0034.3	calcium ion binding	1
B0035.1	zinc ion binding	1
B0035.10	DNA binding	1
B0035.12	nucleic acid binding	1
	nucleotide binding	1
B0035.14	heat shock protein binding	1
	unfolded protein binding	1
B0035.16	asparagine synthase (glutamine-hydrolyzing) activity	1
	transferase activity	1
B0035.2	heat shock protein binding	1
B0035.4	unfolded protein binding	1
B0035.5	binding	1
	catalytic activity	1
	glucose-6-phosphate dehydrogenase activity	1
B0035.7	DNA binding	1
	sequence-specific DNA binding	1
B0035.8	DNA binding	1
	sequence-specific DNA binding	1
B0035.9	DNA binding	1
	sequence-specific DNA binding	1
	transcription initiation factor activity	1
B0041.4	structural constituent of ribosome	1
B0041.6	6-pyruvoyltetrahydropterin synthase activity	1
	metal ion binding	1
B0041.7	ATP binding	1
	DNA binding	1
	helicase activity	1
	hydrolase activity	1
	nucleic acid binding	1
B0205.11	structural constituent of ribosome	1
B0205.4	galactoside 2-alpha-L-fucosyltransferase activity	1
B0205.6	catalytic activity	1
	cysteine desulfurase activity	1
	lyase activity	1
	pyridoxal phosphate binding	1
B0205.7	ATP binding	1
	protein kinase activity	1
	protein serine/threonine kinase activity	1
B0207.12	drug binding	1
	extracellular ligand-gated ion channel activity	1
	extracellular-glutamate-gated chloride channel activity	1
B0207.4	ATP binding	1
	ATPase binding	1
	kinesin binding	1
	protein kinase activity	1
	protein serine/threonine kinase activity	1
	protein tyrosine kinase activity	1
B0207.6	nucleotide binding	1
B0212.5	cation channel activity	1
	ion channel activity	1
B0213.10	electron carrier activity	1
	heme binding	1
	iron ion binding	1
	monooxygenase activity	1
B0213.11	electron carrier activity	1
	heme binding	1
	iron ion binding	1
	monooxygenase activity	1
B0213.12	electron carrier activity	1
	heme binding	1
	iron ion binding	1
	monooxygenase activity	1
B0213.14	electron carrier activity	1
	heme binding	1
	iron ion binding	1
	monooxygenase activity	1
B0213.15	electron carrier activity	1
	heme binding	1
	iron ion binding	1
	monooxygenase activity	1
B0213.16	electron carrier activity	1
	heme binding	1
	iron ion binding	1
	monooxygenase activity	1
B0218.1	carbon-nitrogen ligase activity, with glutamine as amido-N-donor	1
B0218.2	carbon-nitrogen ligase activity, with glutamine as amido-N-donor	1
B0218.3	ATP binding	1
	MAP kinase activity	1
	protein kinase activity	1
	protein serine/threonine kinase activity	1
	transcription factor binding	1
B0218.5	ATP binding	1
	protein kinase activity	1
	protein serine/threonine kinase activity	1
B0218.6	binding	1
B0218.8	binding	1
B0222.2	inorganic phosphate transmembrane transporter activity	1
B0222.3	inorganic phosphate transmembrane transporter activity	1
B0222.4	carboxy-lyase activity	1
	catalytic activity	1
	pyridoxal phosphate binding	1
B0222.6	structural constituent of cuticle	1
B0222.7	structural constituent of cuticle	1
B0222.8	structural constituent of cuticle	1
B0222.9	ATP binding	1
	catalytic activity	1
	electron carrier activity	1
	FAD binding	1
	iron-sulfur cluster binding	1
	metal ion binding	1
	oxidoreductase activity	1
	protein kinase activity	1
B0228.7	catalytic activity	1
	transferase activity, transferring pentosyl groups	1
B0238.10	N-acetyltransferase activity	1
B0240.1	ammonium transmembrane transporter activity	1
B0244.2	protein tyrosine phosphatase activity	1
	transmembrane receptor protein tyrosine phosphatase activity	1
B0250.1	structural constituent of ribosome	1
B0250.5	3-hydroxyisobutyrate dehydrogenase activity	1
	binding	1
	catalytic activity	1
	coenzyme binding	1
	NAD or NADH binding	1
	oxidoreductase activity	1
B0252.2	hydrolase activity	1
	sphingomyelin phosphodiesterase activity	1
B0252.4	peptidyl-prolyl cis-trans isomerase activity	1
B0261.1	DNA binding	1
B0261.2	1-phosphatidylinositol-3-kinase activity	1
	binding	1
	phosphotransferase activity, alcohol group as acceptor	1
	transferase activity, transferring phosphorus-containing groups	1
B0261.4	structural constituent of ribosome	1
B0272.1	GTP binding	1
	GTPase activity	1
	structural molecule activity	1
B0272.3	binding	1
	catalytic activity	1
	coenzyme binding	1
	oxidoreductase activity	1
	phosphogluconate dehydrogenase (decarboxylating) activity	1
B0272.4	catalytic activity	1
B0273.2	binding	1
	RNA binding	1
B0273.4	axon guidance receptor activity	1
	protein binding	1
B0280.1	catalytic activity	1
B0280.12	extracellular-glutamate-gated ion channel activity	1
	ion channel activity	1
	ionotropic glutamate receptor activity	1
	receptor activity	1
	transporter activity	1
B0280.17	RNA binding	1
B0280.3	ribose-5-phosphate isomerase activity	1
B0281.3	protein binding	1
	zinc ion binding	1
B0281.5	protein binding	1
	voltage-gated potassium channel activity	1
B0281.6	protein binding	1
	voltage-gated potassium channel activity	1
B0281.8	protein binding	1
	zinc ion binding	1
B0285.1	ATP binding	1
	protein kinase activity	1
	protein serine/threonine kinase activity	1
B0285.4	methyltransferase activity	1
B0285.5	racemase and epimerase activity, acting on carbohydrates and derivatives	1
B0285.6	citrate transmembrane transporter activity	1
	transporter activity	1
B0286.2	binding	1
	G-protein coupled receptor activity	1
	sugar binding	1
B0286.3	ATP binding	1
	catalytic activity	1
	phosphoribosylaminoimidazole carboxylase activity	1
	phosphoribosylaminoimidazolesuccinocarboxamide synthase activity	1
B0286.4	transcription regulator activity	1
B0286.5	sequence-specific DNA binding	1
	transcription factor activity	1
	transcription regulator activity	1
B0302.1	ATP binding	1
	protein binding	1
	protein kinase activity	1
	protein serine/threonine kinase activity	1
	protein tyrosine kinase activity	1
B0303.15	structural constituent of ribosome	1
B0303.2	methyltransferase activity	1
B0303.3	catalytic activity	1
	transferase activity, transferring acyl groups other than amino-acyl groups	1
B0304.1	bHLH transcription factor binding	1
	RNA polymerase II transcription factor activity, enhancer binding	1
	transcription regulator activity	1
B0304.3	electron carrier activity	1
	heme binding	1
	iron ion binding	1
	monooxygenase activity	1
B0331.1	electron carrier activity	1
	heme binding	1
	iron ion binding	1
	monooxygenase activity	1
B0331.2	inorganic phosphate transmembrane transporter activity	1
B0334.3	catalytic activity	1
	magnesium ion binding	1
	thiamin pyrophosphate binding	1
B0334.5	transferase activity	1
B0334.8	1-phosphatidylinositol-3-kinase activity	1
	inositol or phosphatidylinositol kinase activity	1
	phosphatidylinositol-4,5-bisphosphate 3-kinase activity	1
	phosphotransferase activity, alcohol group as acceptor	1
B0336.10	structural constituent of ribosome	1
B0336.11	structural molecule activity	1
B0336.13	RNA polymerase II transcription factor activity	1
B0336.2	GTP binding	1
	guanyl nucleotide binding	1
	signal transducer activity	1
B0336.3	nucleic acid binding	1
	nucleotide binding	1
	zinc ion binding	1
B0336.4	signal transducer activity	1
B0336.6	protein kinase binding	1
	protein N-terminus binding	1
B0336.9	RNA binding	1
B0348.4	calcium ion binding	1
	phosphoinositide phospholipase C activity	1
	phospholipase C activity	1
	phosphoric diester hydrolase activity	1
B0348.6	RNA binding	1
	translation initiation factor activity	1
B0350.2	cell adhesion molecule binding	1
	hydrolase activity, hydrolyzing O-glycosyl compounds	1
	protein binding	1
B0361.5	phosphatidylserine decarboxylase activity	1
B0361.7	acid phosphatase activity	1
B0365.1	ATP binding	1
	ATP citrate synthase activity	1
	binding	1
	catalytic activity	1
	succinate-CoA ligase (ADP-forming) activity	1
	transferase activity, transferring acyl groups, acyl groups converted into alkyl on transfer	1
B0365.3	ATP binding	1
	ATPase activity, coupled to transmembrane movement of ions, phosphorylative mechanism	1
	catalytic activity	1
	hydrolase activity, acting on acid anhydrides, catalyzing transmembrane movement of substances	1
	monovalent inorganic cation transmembrane transporter activity	1
	potassium ion transmembrane transporter activity	1
	sodium ion transmembrane transporter activity	1
	sodium:potassium-exchanging ATPase activity	1
B0365.6	binding	1
B0379.4	LIM domain binding	1
	phosphatase activity	1
	protein binding, bridging	1
B0393.1	structural constituent of ribosome	1
B0393.2	Rab GTPase activator activity	1
B0393.5	calcium ion binding	1
B0395.1	sodium:hydrogen antiporter activity	1
	solute:hydrogen antiporter activity	1
B0395.3	acyltransferase activity	1
B0399.1	calcium-activated potassium channel activity	1
	calmodulin binding	1
B0403.2	small conjugating protein ligase activity	1
B0403.4	isomerase activity	1
B0412.2	growth factor activity	1
B0412.4	structural constituent of ribosome	1
B0414.2	ATP binding	1
	DNA binding	1
	transcription factor activity	1
B0414.3	DNA binding	1
B0414.5	nucleic acid binding	1
	nucleotide binding	1
B0414.6	ATP binding	1
	ATP-dependent helicase activity	1
	DEAD/H-box RNA helicase binding	1
	DNA binding	1
	helicase activity	1
	hydrolase activity	1
	JUN kinase binding	1
	nucleic acid binding	1
	protein binding	1
	protein self-association	1
	zinc ion binding	1
B0414.7	ATP binding	1
	protein kinase activity	1
	protein serine/threonine kinase activity	1
B0416.6	alpha-1,3-mannosylglycoprotein 2-beta-N-acetylglucosaminyltransferase activity	1
B0432.13	protein binding	1
	zinc ion binding	1
B0432.4	binding	1
B0432.5	iron ion binding	1
	monooxygenase activity	1
	oxidoreductase activity, acting on paired donors, with incorporation or reduction of molecular oxygen, reduced pteridine as one donor, and incorporation of one atom of oxygen	1
	tyrosine 3-monooxygenase activity	1
B0432.8	endodeoxyribonuclease activity, producing 5'-phosphomonoesters	1
B0432.9	hydrolase activity	1
B0454.6	amino acid transmembrane transporter activity	1
B0454.7	binding	1
B0457.1	G-protein coupled receptor activity	1
	latrotoxin receptor activity	1
	sugar binding	1
B0464.1	aminoacyl-tRNA ligase activity	1
	aspartate-tRNA ligase activity	1
	ATP binding	1
	nucleic acid binding	1
	nucleotide binding	1
B0464.2	binding	1
B0464.5	ATP binding	1
	protein kinase activity	1
	protein serine/threonine kinase activity	1
B0464.7	DNA binding	1
	double-stranded DNA binding	1
	identical protein binding	1
B0464.9	catalytic activity	1
B0478.1	ATP binding	1
	JUN kinase activity	1
	MAP kinase activity	1
	phosphotransferase activity, alcohol group as acceptor	1
	protein kinase activity	1
	protein serine/threonine kinase activity	1
	transcription factor binding	1
B0491.1	transferase activity, transferring hexosyl groups	1
B0491.2	structural constituent of collagen and cuticulin-based cuticle	1
	structural constituent of cuticle	1
B0491.7	diphthine synthase activity	1
	methyltransferase activity	1
B0491.8	ion channel activity	1
	transporter activity	1
	voltage-gated chloride channel activity	1
B0495.2	ATP binding	1
	protein kinase activity	1
	protein serine/threonine kinase activity	1
B0495.4	sodium:hydrogen antiporter activity	1
	solute:hydrogen antiporter activity	1
B0495.7	hydrolase activity	1
	peptidase activity	1
B0496.3	ATP binding	1
	phosphotransferase activity, alcohol group as acceptor	1
	protein kinase activity	1
	protein serine/threonine kinase activity	1
B0496.7	zinc ion binding	1
B0496.8	zinc ion binding	1
B0511.1	calcium ion binding	1
B0511.13	hydrolase activity	1
B0511.4	ATP binding	1
	protein kinase activity	1
	protein serine/threonine kinase activity	1
B0511.6	ATP binding	1
	ATP-dependent helicase activity	1
	DNA binding	1
	helicase activity	1
	hydrolase activity	1
	nucleic acid binding	1
B0513.3	structural constituent of ribosome	1
B0513.5	calcium ion binding	1
	proline dehydrogenase activity	1
B0523.5	actin binding	1
	protein binding	1
B0545.1	ATP binding	1
	protein kinase activity	1
	protein kinase C activity	1
	protein serine/threonine kinase activity	1
B0545.4	protein dimerization activity	1
B0547.1	DEAD/H-box RNA helicase binding	1
	protein binding	1
	protein C-terminus binding	1
B0564.1	3'-5'-exoribonuclease activity	1
	RNA binding	1
B0564.10	DNA binding	1
	sequence-specific DNA binding	1
	transcription factor activity	1
	transcription regulator activity	1
B0564.2	oxidoreductase activity	1
BE0003N10.1	3'-5'-exoribonuclease activity	1
	polyribonucleotide nucleotidyltransferase activity	1
	RNA binding	1
BE0003N10.2	protein binding	1
BE10.2	iron ion binding	1
	oxidoreductase activity	1
C01B10.8	catalytic activity	1
	methyltransferase activity	1
	O-methyltransferase activity	1
C01B10.9	catalytic activity	1
C01B12.1	structural constituent of cuticle	1
C01B12.2	binding	1
	DNA binding	1
C01B4.6	carbohydrate binding	1
	catalytic activity	1
	isomerase activity	1
C01B7.4	protein binding	1
C01B7.6	hydrolase activity	1
	mitogen-activated protein kinase kinase kinase binding	1
	protein binding	1
	ubiquitin-protein ligase activity	1
	zinc ion binding	1
C01C10.3	acyltransferase activity	1
C01C4.3	ATP binding	1
	protein kinase activity	1
	protein serine/threonine kinase activity	1
C01F1.3	3-beta-hydroxy-delta5-steroid dehydrogenase activity	1
	binding	1
	catalytic activity	1
	coenzyme binding	1
	dTDP-4-dehydrorhamnose reductase activity	1
C01F6.5	nucleotide binding	1
C01F6.6	protein binding	1
C01F6.9	zinc ion binding	1
C01G10.10	endopeptidase activity	1
	metalloendopeptidase activity	1
	zinc ion binding	1
C01G10.11	signal transducer activity	1
	structural molecule activity	1
C01G10.7	carbon-carbon lyase activity	1
	catalytic activity	1
	citrate (pro-3S)-lyase activity	1
C01G10.8	ATPase activator activity	1
	chaperone binding	1
C01G12.5	2,3-dihydro-2,3-dihydroxybenzoate dehydrogenase activity	1
	binding	1
	catalytic activity	1
	oxidoreductase activity	1
C01G12.8	ATP binding	1
	ATPase activity, coupled to transmembrane movement of ions, phosphorylative mechanism	1
	catalytic activity	1
	hydrolase activity, acting on acid anhydrides, catalyzing transmembrane movement of substances	1
	monovalent inorganic cation transmembrane transporter activity	1
C01G5.5	oxidoreductase activity	1
C01G5.6	aspartic-type endopeptidase activity	1
C01G6.1	transporter activity	1
	water channel activity	1
C01G6.4	protein binding	1
	zinc ion binding	1
C01G6.6	FMN binding	1
	iron ion binding	1
	oxidoreductase activity	1
C01G6.7	catalytic activity	1
C01G6.8	ATP binding	1
	phosphotransferase activity, alcohol group as acceptor	1
	protein binding	1
	protein kinase activity	1
	protein serine/threonine kinase activity	1
	protein tyrosine kinase activity	1
	transmembrane receptor protein tyrosine kinase activity	1
C01G8.3	binding	1
	catalytic activity	1
	coenzyme binding	1
	oxidoreductase activity	1
C01G8.4	heat shock protein binding	1
	unfolded protein binding	1
C01G8.5	binding	1
	cytoskeletal protein binding	1
	structural molecule activity	1
C01G8.9	DNA binding	1
C01H6.1	structural constituent of cuticle	1
C01H6.4	binding	1
	catalytic activity	1
	electron carrier activity	1
	FAD binding	1
	flavin-containing monooxygenase activity	1
	NADP or NADPH binding	1
	oxidoreductase activity	1
C01H6.5	DNA binding	1
	ligand-dependent nuclear receptor activity	1
	sequence-specific DNA binding	1
	steroid hormone receptor activity	1
	transcription factor activity	1
	zinc ion binding	1
C01H6.9	ATP binding	1
	protein kinase activity	1
C02B10.1	acyl-CoA dehydrogenase activity	1
	FAD binding	1
	oxidoreductase activity	1
	oxidoreductase activity, acting on the CH-CH group of donors	1
C02B8.4	transcription regulator activity	1
C02B8.6	protein binding	1
	zinc ion binding	1
C02C2.1	oxidoreductase activity	1
C02C2.5	oxidoreductase activity	1
C02C6.1	GTP binding	1
	GTPase activity	1
C02C6.3	protein binding	1
C02D4.2	octopamine receptor activity	1
C02D5.3	glutathione transferase activity	1
C02E7.1	ATP binding	1
	ATPase activity, coupled to transmembrane movement of ions, phosphorylative mechanism	1
	catalytic activity	1
	hydrolase activity, acting on acid anhydrides, catalyzing transmembrane movement of substances	1
	transporter activity	1
C02F12.4	Rho guanyl-nucleotide exchange factor activity	1
C02F4.1	GTP binding	1
	GTPase binding	1
	guanyl-nucleotide exchange factor activity	1
	small GTPase regulator activity	1
C02F4.2	hydrolase activity	1
C02F5.3	ferrous iron transmembrane transporter activity	1
	GTP binding	1
C02F5.9	endopeptidase activity	1
	threonine-type endopeptidase activity	1
C02G6.1	catalytic activity	1
	metal ion binding	1
	metalloendopeptidase activity	1
	zinc ion binding	1
C02G6.2	catalytic activity	1
	metal ion binding	1
	metalloendopeptidase activity	1
	zinc ion binding	1
C02H6.1	galactosyltransferase activity	1
	transferase activity, transferring glycosyl groups	1
C02H7.1	transporter activity	1
C02H7.3	Rab guanyl-nucleotide exchange factor activity	1
C03A3.3	hydrolase activity	1
C03B8.4	nucleic acid binding	1
	zinc ion binding	1
C03C10.1	ATP binding	1
	protein kinase activity	1
	protein serine/threonine kinase activity	1
C03C10.3	oxidoreductase activity	1
	ribonucleoside-diphosphate reductase activity	1
C03D6.3	ATP binding	1
	DNA ligase (ATP) activity	1
	mRNA guanylyltransferase activity	1
	phosphatase activity	1
	polynucleotide 5'-phosphatase activity	1
	protein tyrosine phosphatase activity	1
	protein tyrosine/serine/threonine phosphatase activity	1
	RNA-dependent ATPase activity	1
C03D6.8	structural constituent of ribosome	1
C03E10.4	alpha-1,6-mannosylglycoprotein 2-beta-N-acetylglucosaminyltransferase activity	1
C03E10.5	binding	1
C03F11.1	calcium-activated potassium channel activity	1
	calmodulin binding	1
C03F11.2	hydrolase activity	1
C03G5.1	electron carrier activity	1
	FAD binding	1
	oxidoreductase activity	1
	oxidoreductase activity, acting on the CH-CH group of donors	1
C03G6.14	electron carrier activity	1
	heme binding	1
	iron ion binding	1
	monooxygenase activity	1
C03G6.15	electron carrier activity	1
	heme binding	1
	iron ion binding	1
	monooxygenase activity	1
C03G6.19	serine-type endopeptidase inhibitor activity	1
C03H5.1	binding	1
C03H5.2	nucleotide-sugar transmembrane transporter activity	1
	sugar:hydrogen symporter activity	1
C03H5.4	calcium ion binding	1
	phospholipase A2 activity	1
C04A11.3	ATP binding	1
	protein kinase activity	1
	protein serine/threonine kinase activity	1
C04A11.4	metalloendopeptidase activity	1
	zinc ion binding	1
C04A2.1	Rab GTPase activator activity	1
C04A2.3	DNA binding	1
	sequence-specific DNA binding	1
	transcription factor activity	1
	zinc ion binding	1
C04A2.7	heat shock protein binding	1
C04C3.2	extracellular ligand-gated ion channel activity	1
C04C3.3	catalytic activity	1
C04F1.3	DNA binding	1
	sequence-specific DNA binding	1
	transcription factor activity	1
	transcription regulator activity	1
	zinc ion binding	1
C04F12.10	metalloendopeptidase activity	1
C04F12.3	protein binding	1
C04F12.4	structural constituent of ribosome	1
C04F12.8	phosphatase activity	1
	protein tyrosine phosphatase activity	1
	protein tyrosine/serine/threonine phosphatase activity	1
C04F12.9	nucleic acid binding	1
	ribonuclease H activity	1
C04F5.1	RNA transmembrane transporter activity	1
	serine-type endopeptidase inhibitor activity	1
C04F6.3	catalytic activity	1
	cation binding	1
	chitin binding	1
	chitinase activity	1
	hydrolase activity, hydrolyzing O-glycosyl compounds	1
C04F6.4	actin binding	1
C04G2.6	electron carrier activity	1
	ribonuclease activity	1
	RNA binding	1
	sequence-specific DNA binding	1
	transcription regulator activity	1
C04G2.7	DNA binding	1
	sequence-specific DNA binding	1
	transcription factor activity	1
C04G6.1	ATP binding	1
	MAP kinase activity	1
	protein kinase activity	1
	protein serine/threonine kinase activity	1
C04G6.3	catalytic activity	1
	phosphoinositide binding	1
	protein binding	1
C04H5.6	ATP binding	1
	ATP-dependent helicase activity	1
	helicase activity	1
	nucleic acid binding	1
C05A2.1	hydrolase activity	1
C05A9.1	ATP binding	1
	ATPase activity	1
	ATPase activity, coupled to transmembrane movement of substances	1
	nucleoside-triphosphatase activity	1
	nucleotide binding	1
C05B10.1	MAP kinase tyrosine/serine/threonine phosphatase activity	1
	protein binding	1
	protein tyrosine/serine/threonine phosphatase activity	1
C05B5.7	signal transducer activity	1
C05C10.1	acid phosphatase activity	1
C05C10.3	CoA-transferase activity	1
C05C10.4	acid phosphatase activity	1
C05C12.3	ion channel activity	1
C05C8.5	exonuclease activity	1
C05C8.6	protein binding	1
C05C8.7	mannose-6-phosphate isomerase activity	1
	zinc ion binding	1
C05C8.9	protein binding	1
C05D10.2	ATP binding	1
	MAP kinase activity	1
	protein kinase activity	1
	protein serine/threonine kinase activity	1
C05D10.3	ATP binding	1
	ATPase activity	1
	nucleoside-triphosphatase activity	1
	nucleotide binding	1
C05D11.11	catalytic activity	1
	glycine hydroxymethyltransferase activity	1
	pyridoxal phosphate binding	1
C05D11.12	binding	1
	catalytic activity	1
	electron carrier activity	1
	electron-transferring-flavoprotein dehydrogenase activity	1
	oxidoreductase activity	1
C05D11.4	fibroblast growth factor receptor binding	1
	growth factor activity	1
	protein kinase binding	1
	transcription factor binding	1
C05D11.6	metalloendopeptidase activity	1
	metallopeptidase activity	1
	zinc ion binding	1
C05D11.9	ribonuclease P activity	1
C05D12.1	dopamine beta-monooxygenase activity	1
C05D2.1	ATP binding	1
	growth factor binding	1
	protein kinase activity	1
	protein serine/threonine kinase activity	1
	receptor signaling protein serine/threonine kinase activity	1
	transmembrane receptor protein serine/threonine kinase activity	1
C05D9.1	phosphoinositide binding	1
	protein binding	1
C05D9.3	binding	1
	receptor activity	1
C05D9.5	RNA binding	1
	translation initiation factor activity	1
C05E4.1	serine-type endopeptidase inhibitor activity	1
C05E4.3	serine-type endopeptidase inhibitor activity	1
C05G5.4	ATP citrate synthase activity	1
	binding	1
	catalytic activity	1
	succinate-CoA ligase (ADP-forming) activity	1
C05H8.1	ATP binding	1
	calmodulin binding	1
	calmodulin-dependent protein kinase activity	2
	protein kinase activity	1
	protein serine/threonine kinase activity	1
C06A1.1	ATP binding	1
	ATPase activity	1
	binding	1
	four-way junction helicase activity	1
	hydrolase activity	1
	nucleoside-triphosphatase activity	1
	nucleotide binding	1
C06A1.5	DNA binding	1
	DNA-directed RNA polymerase activity	1
C06A1.6	endonuclease activity	1
C06A1.7	endonuclease activity	1
C06A5.11	hydrolase activity, acting on carbon-nitrogen (but not peptide) bonds, in linear amides	1
	NAD binding	1
	zinc ion binding	1
C06A5.7	tropomyosin binding	1
C06A6.4	aminoacylase activity	1
	hydrolase activity	1
	metallopeptidase activity	1
	protein binding	1
C06A8.1	methylenetetrahydrofolate reductase (NADPH) activity	1
C06A8.6	protein binding	1
C06A8.9	extracellular-glutamate-gated ion channel activity	1
	ionotropic glutamate receptor activity	1
	transporter activity	1
C06B3.3	electron carrier activity	1
	heme binding	1
	iron ion binding	1
	monooxygenase activity	1
C06B3.4	alcohol dehydrogenase (NAD) activity	1
	binding	1
	catalytic activity	1
	oxidoreductase activity	1
C06B3.5	alcohol dehydrogenase (NAD) activity	1
	binding	1
	catalytic activity	1
	oxidoreductase activity	1
C06B3.8	guanylate cyclase activity	1
	phosphorus-oxygen lyase activity	1
C06B8.3	binding	1
	catalytic activity	1
	oxidoreductase activity	1
C06B8.8	structural constituent of ribosome	1
C06C3.1	electron transporter, transferring electrons within the cyclic electron transport pathway of photosynthesis activity	1
C06E1.10	ATP binding	1
	ATP-dependent helicase activity	1
	helicase activity	1
	nucleic acid binding	1
C06E1.4	alpha-amino-3-hydroxy-5-methyl-4-isoxazole propionate selective glutamate receptor activity	1
	extracellular-glutamate-gated ion channel activity	1
	glutamate binding	1
	ion channel activity	1
	ionotropic glutamate receptor activity	1
	receptor activity	1
	transporter activity	1
C06E2.3	small conjugating protein ligase activity	1
C06E2.7	small conjugating protein ligase activity	1
C06E4.3	2,3-dihydro-2,3-dihydroxybenzoate dehydrogenase activity	1
	binding	1
	catalytic activity	1
	oxidoreductase activity	1
C06E4.6	2,3-dihydro-2,3-dihydroxybenzoate dehydrogenase activity	1
	binding	1
	catalytic activity	1
	oxidoreductase activity	1
C06E7.1	ATP binding	1
	methionine adenosyltransferase activity	1
C06E7.3	ATP binding	1
	methionine adenosyltransferase activity	1
C06G1.5	calcium ion binding	1
C06G3.2	ATP binding	1
	microtubule motor activity	1
C06G3.5	adenosine deaminase activity	1
	deaminase activity	1
C06G3.7	binding	1
	catalytic activity	1
	electron carrier activity	1
	FAD binding	1
	NADP or NADPH binding	1
	oxidoreductase activity	1
	oxidoreductase activity, acting on sulfur group of donors, NAD or NADP as acceptor	1
	thioredoxin-disulfide reductase activity	1
C06G3.8	nucleic acid binding	1
C06G4.2	calcium-dependent cysteine-type endopeptidase activity	1
	cysteine-type endopeptidase activity	1
C06G8.2	oligopeptide transporter activity	1
	transporter activity	1
C06G8.3	metal ion transmembrane transporter activity	1
C06H2.3	N-acetyltransferase activity	1
C06H2.4	folic acid binding	1
	reduced folate carrier activity	1
C07A12.3	DNA binding	1
	ligand-dependent nuclear receptor activity	1
	sequence-specific DNA binding	1
	steroid hormone receptor activity	1
	transcription factor activity	1
	zinc ion binding	1
C07A12.4	isomerase activity	1
	protein disulfide isomerase activity	1
	protein-glutamine gamma-glutamyltransferase activity	1
C07A4.1	nucleic acid binding	1
	nucleotide binding	1
C07A9.3	ATP binding	1
	protein kinase activity	1
	protein serine/threonine kinase activity	1
C07B5.5	deoxyribonuclease II activity	1
	endodeoxyribonuclease activity	1
C07D10.2	protein binding	1
C07D10.4	metalloendopeptidase activity	1
	metallopeptidase activity	1
	zinc ion binding	1
C07D8.5	oxidoreductase activity	1
C07D8.6	oxidoreductase activity	1
C07E3.1	nucleic acid binding	1
C07E3.9	calcium ion binding	1
	phospholipase A2 activity	1
C07F11.1	protein binding	1
	receptor signaling protein activity	1
	transmembrane receptor activity	1
C07G1.1	serine-type endopeptidase activity	1
C07G1.3	ATP binding	1
	protein kinase activity	1
	protein serine/threonine kinase activity	1
C07G1.5	phosphatidylinositol 3-phosphate binding	1
C07G1.8	electron carrier activity	1
	protein disulfide oxidoreductase activity	1
C07G2.2	mitogen-activated protein kinase binding	1
	protein dimerization activity	1
	sequence-specific DNA binding	1
	transcription factor activity	1
C07G2.3	ATP binding	1
	protein binding	1
	unfolded protein binding	1
C07H4.2	ion channel activity	1
	voltage-gated chloride channel activity	1
C07H6.1	ATP binding	1
	DNA binding	1
	DNA ligase (ATP) activity	1
C07H6.4	nucleic acid binding	1
	nucleotide binding	1
	RNA binding	1
C07H6.5	ATP binding	1
	ATP-dependent helicase activity	1
	helicase activity	1
	nucleic acid binding	1
	protein binding	1
	RNA helicase activity	1
C07H6.7	DNA binding	1
	sequence-specific DNA binding	1
	transcription factor activity	1
	transcription regulator activity	1
C08A9.1	metal ion binding	1
	superoxide dismutase activity	1
C08B11.1	binding	1
	protein binding	1
C08B11.3	DNA binding	1
	zinc ion binding	1
C08B11.5	nucleic acid binding	1
	nucleotide binding	1
C08B11.6	protein binding	1
C08B11.7	ubiquitin thiolesterase activity	1
C08B11.8	transferase activity, transferring hexosyl groups	1
C08B6.1	carbohydrate binding	1
	transferase activity, transferring hexosyl groups	1
C08B6.14	acid phosphatase activity	1
	hydrolase activity	1
	metal ion binding	1
C08B6.8	exonuclease activity	1
C08B6.9	binding	1
	catalytic activity	1
	SUMO activating enzyme activity	1
C08C3.3	DNA binding	1
	sequence-specific DNA binding	1
	transcription factor activity	1
	transcription regulator activity	1
C08D8.2	tropomyosin binding	1
C08E8.2	strictosidine synthase activity	1
C08F11.8	carbohydrate binding	1
	transferase activity, transferring hexosyl groups	1
C08F8.1	unfolded protein binding	1
C08F8.2	ATP binding	1
	helicase activity	1
	nucleic acid binding	1
C08F8.6	ATP binding	1
	protein kinase activity	1
	protein serine/threonine kinase activity	1
C08F8.7	ferrous iron transmembrane transporter activity	1
	GTP binding	1
	GTPase activity	1
	protein binding	1
C08F8.8	DNA binding	1
	ligand-dependent nuclear receptor activity	1
	sequence-specific DNA binding	1
	steroid hormone receptor activity	1
	transcription factor activity	1
	zinc ion binding	1
C08G5.4	transporter activity	1
C08H9.1	serine-type carboxypeptidase activity	1
C08H9.2	RNA binding	1
C08H9.3	endonuclease activity	1
	transferase activity, transferring hexosyl groups	1
C08H9.5	ATP binding	1
	protein binding	1
	protein kinase activity	1
	protein serine/threonine kinase activity	1
	protein tyrosine kinase activity	1
C09B8.1	inositol or phosphatidylinositol phosphatase activity	1
	inositol-polyphosphate 5-phosphatase activity	1
C09B8.7	ATP binding	1
	protein kinase activity	1
	protein serine/threonine kinase activity	1
C09D1.1	ATP binding	1
	phosphotransferase activity, alcohol group as acceptor	1
	protein binding	1
	protein kinase activity	1
	protein serine/threonine kinase activity	1
	Rho GTPase binding	1
	Rho guanyl-nucleotide exchange factor activity	1
	vascular endothelial growth factor receptor activity	1
C09D4.5	structural constituent of ribosome	1
C09D8.1	phosphatase activity	1
	protein tyrosine phosphatase activity	1
	transmembrane receptor protein tyrosine phosphatase activity	1
C09E10.2	diacylglycerol kinase activity	1
	protein binding	1
	Rho GTPase binding	1
	zinc ion binding	1
C09E7.5	protein binding	1
	zinc ion binding	1
C09E7.8	protein binding	1
	zinc ion binding	1
C09E7.9	protein binding	1
	zinc ion binding	1
C09F5.3	zinc ion binding	1
C09F9.3	glutaminase activity	1
C09G12.1	DNA binding	1
	sequence-specific DNA binding	1
	transcription factor activity	1
C09G12.8	GTP binding	1
	GTPase activity	1
	protein binding	1
C09G4.2	ATP binding	1
	protein kinase activity	1
	protein serine/threonine kinase activity	1
C09G4.3	cyclin-dependent protein kinase regulator activity	1
C09G5.1	extracellular ligand-gated ion channel activity	1
	ligand-gated ion channel activity	1
C09G5.3	structural constituent of cuticle	1
C09G5.4	structural constituent of cuticle	1
C09G5.5	structural constituent of cuticle	1
C09G5.6	structural constituent of collagen and cuticulin-based cuticle	1
	structural constituent of cuticle	1
C09G9.6	catalytic activity	1
	nucleic acid binding	1
	zinc ion binding	1
C09H10.2	structural constituent of ribosome	1
C09H10.3	4 iron, 4 sulfur cluster binding	1
	FMN binding	1
	NAD or NADH binding	1
	NADH dehydrogenase (ubiquinone) activity	1
	oxidoreductase activity, acting on NADH or NADPH	1
C09H5.2	ATP binding	1
	ATPase activity, coupled to transmembrane movement of ions, phosphorylative mechanism	1
	catalytic activity	1
	hydrolase activity, acting on acid anhydrides, catalyzing transmembrane movement of substances	1
C09H6.1	nucleic acid binding	1
	zinc ion binding	1
C09H6.2	phosphotyrosine binding	1
	protein binding	1
C10A4.1	protein dimerization activity	1
C10C5.3	aminoacylase activity	1
	hydrolase activity	1
	metallopeptidase activity	1
	protein binding	1
C10C5.4	aminoacylase activity	1
	hydrolase activity	1
	metallopeptidase activity	1
	protein binding	1
C10C5.5	aminoacylase activity	1
	hydrolase activity	1
	metallopeptidase activity	1
	protein binding	1
C10C6.1	ATP binding	1
	magnesium ion binding	1
	protein binding	1
	protein kinase activity	1
	protein serine/threonine kinase activity	1
C10C6.5	ATP binding	1
	ATPase activity	1
	nucleoside-triphosphatase activity	1
	nucleotide binding	1
C10C6.6	ATP binding	1
	ATPase activity	1
	ATPase activity, coupled to transmembrane movement of ions, phosphorylative mechanism	1
	hydrolase activity, acting on acid anhydrides, catalyzing transmembrane movement of substances	1
C10E2.3	calmodulin binding	1
	histone deacetylase activity	1
	transcription corepressor activity	1
	transcription factor binding	1
C10F3.2	binding	1
	catalytic activity	1
	oxidoreductase activity	1
C10F3.3	adenylate cyclase activity	1
	phosphorus-oxygen lyase activity	1
C10F3.5	methyltransferase activity	1
	protein methyltransferase activity	1
	protein-L-isoaspartate (D-aspartate) O-methyltransferase activity	1
	tRNA (guanine-N7-)-methyltransferase activity	1
C10F3.6	glycoprotein 6-alpha-L-fucosyltransferase activity	1
C10G11.5	ATP binding	1
	pantothenate kinase activity	1
C10G6.1	3'-5' exonuclease activity	1
	nucleic acid binding	1
C10G8.5	calcium:sodium antiporter activity	1
C10G8.7	DNA binding	1
	sequence-specific DNA binding	1
	transcription factor activity	1
	transcription regulator activity	1
C10H11.1	actin binding	1
C10H11.3	carbohydrate binding	1
	transferase activity, transferring hexosyl groups	1
C10H11.4	carbohydrate binding	1
	transferase activity, transferring hexosyl groups	1
C10H11.5	carbohydrate binding	1
	transferase activity, transferring hexosyl groups	1
C10H11.6	carbohydrate binding	1
	transferase activity, transferring hexosyl groups	1
C10H11.9	ATP binding	1
	protein kinase activity	1
	protein serine/threonine kinase activity	1
C11D2.2	aspartic-type endopeptidase activity	1
C11D2.6	ion channel activity	1
	RNA binding	1
	structural constituent of ribosome	1
C11D2.7	RNA binding	1
C11D9.1	Rho guanyl-nucleotide exchange factor activity	1
C11E4.1	antioxidant activity	1
	glutathione peroxidase activity	1
	oxidoreductase activity	1
C11E4.2	antioxidant activity	1
	glutathione peroxidase activity	1
	oxidoreductase activity	1
C11G6.3	protein binding	1
	zinc ion binding	1
C11H1.3	protein binding	1
	zinc ion binding	1
C11H1.4	ATP binding	1
	nucleoside-triphosphatase activity	1
	nucleotide binding	1
	protein binding	1
C12C8.1	ATP binding	1
C12C8.2	catalytic activity	1
	pyridoxal phosphate binding	1
	transferase activity, transferring nitrogenous groups	1
C12C8.3	protein binding	1
	zinc ion binding	1
C12D12.2	L-glutamate transmembrane transporter activity	1
	sodium:dicarboxylate symporter activity	1
C12D12.5	DNA binding	1
C12D5.7	electron carrier activity	1
	heme binding	1
	iron ion binding	1
	monooxygenase activity	1
C12D8.1	RNA binding	1
C12D8.10	ATP binding	1
	calmodulin binding	1
	protein kinase activity	1
	protein serine/threonine kinase activity	1
C12D8.11	RNA binding	1
C12D8.8	structural constituent of cuticle	1
C13B4.1	dopamine beta-monooxygenase activity	1
C13B4.2	ubiquitin thiolesterase activity	1
C13B9.4	calcitonin receptor activity	1
	G-protein coupled receptor activity	1
C13C4.4	catalytic activity	1
	hydrolase activity	1
C13C4.5	transporter activity	1
C13D9.9	carbohydrate binding	1
	transferase activity, transferring hexosyl groups	1
C13G3.3	protein phosphatase type 2A regulator activity	1
C13G5.1	DNA binding	1
	sequence-specific DNA binding	1
	transcription factor activity	1
	transcription regulator activity	1
C14A11.3	Rho guanyl-nucleotide exchange factor activity	1
C14A11.7	GTP binding	1
	GTPase activity	1
	protein binding	1
C14A4.1	binding	1
C14A4.10	DNA binding	1
	RNA polymerase II transcription factor activity	1
C14A4.3	transferase activity, transferring glycosyl groups	1
C14A4.4	3'-5' exonuclease activity	1
	exonuclease activity	1
	nucleic acid binding	1
C14A4.5	3'-5' exonuclease activity	1
	3'-5'-exoribonuclease activity	1
	RNA binding	1
C14A6.1	binding	1
C14B1.1	calcium ion binding	1
	isomerase activity	1
	oxidoreductase activity	1
	protein disulfide isomerase activity	1
	protein-glutamine gamma-glutamyltransferase activity	1
C14B1.10	methyltransferase activity	1
	nucleotide binding	1
	oxidoreductase activity	1
C14B9.1	heat shock protein binding	1
C14B9.2	calcium ion binding	1
	isomerase activity	1
	protein binding	1
	protein disulfide isomerase activity	1
C14B9.4	ATP binding	1
	protein binding	1
	protein kinase activity	1
	protein serine/threonine kinase activity	1
C14B9.6	DNA binding	1
	protein binding	1
C14B9.7	structural constituent of ribosome	1
C14B9.8	calmodulin binding	1
	catalytic activity	1
	glucan 1,4-alpha-glucosidase activity	1
C14C10.1	binding	1
C14C10.5	binding	1
C14C11.3	catalytic activity	1
	cation binding	1
	hydrolase activity, hydrolyzing O-glycosyl compounds	1
C14C11.6	ATP binding	1
	ATP-dependent helicase activity	1
	DNA binding	1
	helicase activity	1
	hydrolase activity	1
	nucleic acid binding	1
C14E2.2	catalytic activity	1
	pyridoxal phosphate binding	1
	transaminase activity	1
	transferase activity, transferring nitrogenous groups	1
C14F11.1	catalytic activity	1
	pyridoxal phosphate binding	1
	transaminase activity	1
	transferase activity, transferring nitrogenous groups	1
C14F11.2	protein binding	1
C14F5.1	protein binding	1
C14F5.4	cation transmembrane transporter activity	1
C14F5.5	protein binding	1
	SH3/SH2 adaptor activity	1
C14H10.1	metal ion transmembrane transporter activity	1
C14H10.3	carboxy-lyase activity	1
	catalytic activity	1
	pyridoxal phosphate binding	1
C15A11.1	structural constituent of cuticle	1
C15A11.5	structural constituent of cuticle	1
C15A11.6	structural constituent of cuticle	1
C15B12.1	binding	1
	catalytic activity	1
	oxidoreductase activity	1
C15B12.7	cation transmembrane transporter activity	1
	zinc ion transmembrane transporter activity	1
C15B12.8	binding	1
	catalytic activity	1
	oxidoreductase activity	1
C15C6.4	ribonuclease activity	1
	RNA binding	1
C15C7.1	SNAP receptor activity	1
C15C8.2	protein binding	1
	sequence-specific DNA binding	1
	signal transducer activity	1
C15C8.3	aspartic-type endopeptidase activity	1
C15F1.3	transmembrane receptor activity	1
C15F1.4	nucleotidyltransferase activity	1
C15F1.7	copper ion binding	1
	metal ion binding	1
	superoxide dismutase activity	1
C15H11.4	binding	1
	catalytic activity	1
	coenzyme binding	1
	oxidoreductase activity	1
C15H11.7	endopeptidase activity	1
	threonine-type endopeptidase activity	1
C15H11.8	nucleic acid binding	1
	transcription regulator activity	1
	zinc ion binding	1
C15H9.1	binding	1
	catalytic activity	1
	NAD(P) transhydrogenase activity	1
	NAD(P)+ transhydrogenase (AB-specific) activity	1
	oxidoreductase activity	1
	phosphopantetheine binding	1
C15H9.6	ATP binding	1
	ATPase activity	1
	calcium ion binding	1
	protein binding	1
C15H9.7	catalytic activity	1
	kynureninase activity	1
	pyridoxal phosphate binding	1
C15H9.8	phosphopantetheine binding	1
C16A3.1	ATP binding	1
	DNA binding	1
	helicase activity	1
	hydrolase activity, acting on acid anhydrides, in phosphorus-containing anhydrides	1
	nucleic acid binding	1
C16A3.10	catalytic activity	1
	pyridoxal phosphate binding	1
	transaminase activity	1
C16A3.2	phosphatase activity	1
	protein tyrosine phosphatase activity	1
	protein tyrosine/serine/threonine phosphatase activity	1
C16A3.3	binding	1
C16A3.4	nucleic acid binding	1
	zinc ion binding	1
C16A3.7	nucleic acid binding	1
	transcription factor activity	1
	zinc ion binding	1
C16A3.9	structural constituent of ribosome	1
C16B8.1	ATP binding	1
	protein binding	1
	protein kinase activity	1
	protein serine/threonine kinase activity	1
	protein tyrosine kinase activity	1
C16C10.1	binding	1
C16C10.12	ATP binding	1
	ATPase activity	1
	nucleoside-triphosphatase activity	1
	nucleotide binding	1
C16C10.5	protein binding	1
	ubiquitin-protein ligase activity	1
	zinc ion binding	1
C16C10.7	protein binding	1
	ubiquitin-protein ligase activity	1
	zinc ion binding	1
C16C2.1	DNA binding	1
	sequence-specific DNA binding	1
	transcription factor activity	1
	transcription regulator activity	1
C16C2.2	GTPase activator activity	1
	regulator of G-protein signaling activity	1
	signal transducer activity	1
C16C2.3	inositol or phosphatidylinositol phosphatase activity	1
C16C8.2	heme binding	1
	peroxidase activity	1
C16D6.2	neuropeptide Y receptor activity	1
C16D9.2	ATP binding	1
	protein binding	1
	protein kinase activity	1
	protein serine/threonine kinase activity	1
C16D9.6	galactosyltransferase activity	1
	transferase activity, transferring glycosyl groups	1
C16H3.1	calcium ion binding	1
C16H3.2	sugar binding	1
C17A2.3	galactosyltransferase activity	1
	transferase activity, transferring glycosyl groups	1
C17C3.1	acyl-CoA thioesterase activity	1
C17C3.12	acyl-CoA dehydrogenase activity	1
	FAD binding	1
	oxidoreductase activity	1
	oxidoreductase activity, acting on the CH-CH group of donors	1
C17C3.3	acyl-CoA thioesterase activity	1
C17D12.2	mRNA binding	1
	nucleic acid binding	1
	nucleotide binding	1
C17D12.6	calcium ion binding	1
	receptor binding	1
C17E4.11	methyltransferase activity	1
C17E4.3	zinc ion binding	1
C17E4.5	nucleic acid binding	1
	nucleotide binding	1
C17E4.6	DNA binding	1
	transcription factor activity	1
C17E4.9	sodium:potassium-exchanging ATPase activity	1
C17F4.8	protein binding	1
	voltage-gated potassium channel activity	1
C17G1.3	carbohydrate binding	1
	transferase activity, transferring hexosyl groups	1
C17G1.7	catalytic activity	1
	cysteine synthase activity	1
	pyridoxal phosphate binding	1
C17G10.1	iron ion binding	1
	L-ascorbic acid binding	1
	oxidoreductase activity	1
	oxidoreductase activity, acting on paired donors, with incorporation or reduction of molecular oxygen	1
	oxidoreductase activity, acting on paired donors, with incorporation or reduction of molecular oxygen, 2-oxoglutarate as one donor, and incorporation of one atom each of oxygen into both donors	1
C17G10.2	binding	1
C17G10.4	nucleic acid binding	1
	phosphatase activity	1
	protein tyrosine phosphatase activity	1
	protein tyrosine/serine/threonine phosphatase activity	1
C17G10.8	binding	1
	catalytic activity	1
	oxidoreductase activity	1
	sterol binding	1
C17H11.6	protein binding	1
	zinc ion binding	1
C17H12.14	proton-transporting ATPase activity, rotational mechanism	1
C17H12.9	DNA binding	1
	hydrolase activity, acting on acid anhydrides, catalyzing transmembrane movement of substances	1
	sequence-specific DNA binding	1
	transcription factor activity	1
C18A3.1	methyltransferase activity	1
	nucleic acid binding	1
C18A3.5	nucleic acid binding	1
	nucleotide binding	1
C18A3.6	GTP binding	1
	GTPase activity	1
	protein binding	1
C18A3.8	DNA binding	1
	protein heterodimerization activity	1
	specific RNA polymerase II transcription factor activity	1
	transcription regulator activity	1
C18B12.2	G-protein coupled receptor activity	1
C18B12.3	DNA binding	1
	sequence-specific DNA binding	1
	transcription factor activity	1
	transcription regulator activity	1
C18B12.4	protein binding	1
	zinc ion binding	1
C18B2.6	sodium channel activity	1
C18C4.10	binding	1
	kinesin binding	1
	microtubule motor activity	1
	protein binding	1
C18C4.2	ATP binding	1
	ATPase activity	1
	ATPase activity, coupled to transmembrane movement of substances	1
	beta-lactamase activity	1
C18C4.3	aminoacyl-tRNA ligase activity	1
	ATP binding	1
	carbohydrate binding	1
	nucleotide binding	1
	transferase activity, transferring hexosyl groups	1
C18D11.2	acyl-CoA binding	1
	binding	1
C18D11.4	nucleic acid binding	1
	nucleotide binding	1
C18E3.6	actin binding	1
	binding	1
C18E9.11	ATP binding	1
C18E9.2	protein transporter activity	1
C18E9.4	NADH dehydrogenase (ubiquinone) activity	1
C18E9.6	voltage-gated anion channel activity	1
C18F3.2	ankyrin binding	1
	cell adhesion molecule binding	1
	protein binding	1
C18G1.5	DNA binding	1
C18H7.3	structural constituent of cuticle	1
C18H7.4	ATP binding	1
	protein binding	1
	protein kinase activity	1
	protein serine/threonine kinase activity	1
	protein tyrosine kinase activity	1
C18H9.7	acetylcholine receptor binding	1
	binding	1
	protein binding	1
	zinc ion binding	1
C18H9.8	protein binding	1
C23G10.3	RNA binding	1
	structural constituent of ribosome	1
C23G10.4	binding	1
	enzyme regulator activity	1
C23G10.6	transferase activity, transferring hexosyl groups	1
C23G10.7	methyltransferase activity	1
C23H3.3	RNA binding	1
C23H3.4	catalytic activity	1
	pyridoxal phosphate binding	1
	transferase activity, transferring nitrogenous groups	1
C23H3.7	alpha,alpha-trehalase activity	1
C23H3.9	hydrolase activity	1
C23H5.2	heme binding	1
	iron ion binding	1
	oxygen binding	1
C24A1.2	sequence-specific DNA binding	1
	transcription factor activity	1
C24A1.3	ATP binding	1
	protein kinase activity	1
	protein serine/threonine kinase activity	1
C24A11.8	binding	1
C24A3.4	catalytic activity	1
	oxidoreductase activity	1
C24A3.6	outward rectifier potassium channel activity	1
	potassium channel activity	1
C24A8.4	ATP binding	1
	protein kinase activity	1
	protein serine/threonine kinase activity	1
C24B5.2	ATP binding	1
	four-way junction helicase activity	1
	microtubule-severing ATPase activity	1
	nucleoside-triphosphatase activity	1
	nucleotide binding	1
C24B5.3	hedgehog receptor activity	1
	phosphopantetheine binding	1
C24B5.4	hydrolase activity, acting on ester bonds	1
	zinc ion binding	1
C24F3.2	protein tyrosine/serine/threonine phosphatase activity	1
C24F3.3	metalloendopeptidase activity	1
	metallopeptidase activity	1
	zinc ion binding	1
C24F3.4	ATP binding	1
	hydrolase activity, acting on carbon-nitrogen (but not peptide) bonds	1
	NAD+ synthase (glutamine-hydrolyzing) activity	1
C24F3.6	structural constituent of cuticle	1
C24G6.6	binding	1
	catalytic activity	1
C24G6.8	aminoacyl-tRNA hydrolase activity	1
C24G7.1	sodium channel activity	1
C24G7.2	sodium channel activity	1
C24G7.4	sodium channel activity	1
C24H10.5	calcium ion binding	1
C24H11.3	transcription factor activity	1
C24H11.6	serine-type peptidase activity	1
C24H11.7	ARF guanyl-nucleotide exchange factor activity	1
C24H12.4	ATP binding	1
	ATP-dependent helicase activity	1
	helicase activity	1
	nucleic acid binding	1
C25A1.10	signal transducer activity	1
C25A1.11	aryl hydrocarbon receptor nuclear translocator activity	1
	DNA binding	1
	protein binding	1
	sequence-specific DNA binding	1
	signal transducer activity	1
	transcription factor activity	1
	transcription regulator activity	1
C25A1.3	methyltransferase activity	1
C25A1.4	nucleic acid binding	1
	nucleotide binding	1
C25A1.5	heme binding	1
	iron ion binding	1
	oxidoreductase activity	1
C25A1.7	aminoacyl-tRNA ligase activity	1
	ATP binding	1
	isoleucine-tRNA ligase activity	1
	nucleotide binding	1
	zinc ion binding	1
C25A1.8	binding	1
C25A1.9	calcium ion binding	1
	protein binding	1
C25A11.4	cytoskeletal protein binding	1
	zinc ion binding	1
C25B8.1	ion channel activity	1
	potassium channel activity	1
	voltage-gated potassium channel activity	1
C25B8.3	cysteine-type endopeptidase activity	1
	cysteine-type peptidase activity	1
C25B8.4	binding	1
C25D7.6	ATP binding	1
	DNA binding	1
	magnesium chelatase activity	1
	nucleoside-triphosphatase activity	1
	nucleotide binding	1
C25D7.7	GTP binding	1
	GTPase activity	1
	protein binding	1
C25E10.12	hydrolase activity	1
C25E10.2	electron carrier activity	1
	heme binding	1
	iron ion binding	1
	monooxygenase activity	1
C25F6.2	guanylate kinase activity	1
	protein binding	1
C25F6.3	binding	1
	catalytic activity	1
	dihydroorotate dehydrogenase activity	1
	dihydroorotate oxidase activity	1
	electron carrier activity	1
	FAD binding	1
	iron-sulfur cluster binding	1
	oxidoreductase activity	1
	tRNA dihydrouridine synthase activity	1
C25F6.4	ATP binding	1
	protein binding	1
	protein kinase activity	1
	protein serine/threonine kinase activity	1
C25G4.2	hydrolase activity	1
C25G4.4	binding	1
	DNA binding	1
C25G6.5	neuropeptide Y receptor activity	1
C25H3.4	translation initiation factor activity	1
C25H3.8	coenzyme binding	1
	hydroxymethylglutaryl-CoA reductase (NADPH) activity	1
C26B9.5	serine-type peptidase activity	1
C26B9.6	protein binding	1
	zinc ion binding	1
C26C6.1	DNA binding	1
	zinc ion binding	1
C26C6.2	GTP binding	1
	guanyl nucleotide binding	1
	signal transducer activity	1
C26C6.6	zinc ion binding	1
C26D10.2	ATP binding	1
	ATP-dependent helicase activity	1
	helicase activity	1
	nucleic acid binding	1
C26D10.3	binding	1
	catalytic activity	1
C26D10.4	ATP binding	1
	kinase activity	1
C26E6.11	ATP binding	1
	cob(I)yrinic acid a,c-diamide adenosyltransferase activity	1
C26E6.12	ferrous iron transmembrane transporter activity	1
	GTP binding	1
	GTPase activity	1
C26E6.4	DNA binding	1
	DNA-directed RNA polymerase activity	1
	ribonucleoside binding	1
C26E6.6	structural constituent of ribosome	1
C26E6.8	binding	1
	catalytic activity	1
C26E6.9	nucleic acid binding	1
	nucleotide binding	1
C26F1.2	electron carrier activity	1
	GTP binding	1
	heme binding	1
	iron ion binding	1
	monooxygenase activity	1
C26F1.4	structural constituent of ribosome	1
C26F1.7	catalytic activity	1
C26F1.9	structural constituent of ribosome	1
C26G2.1	immunoglobulin binding	1
	transmembrane receptor activity	1
C26H9A.1	hydrogen ion transmembrane transporter activity	1
C27A12.5	DNA binding	1
	sequence-specific DNA binding	1
	transcription factor activity	1
	transcription regulator activity	1
C27A12.6	zinc ion binding	1
C27A12.7	zinc ion binding	1
C27A12.8	zinc ion binding	1
C27A12.9	catalytic activity	1
C27A2.1	ATP binding	1
C27A2.2	structural constituent of ribosome	1
C27A2.4	acid phosphatase activity	1
C27A2.6	protein binding	1
	signal transducer activity	1
C27A2.7	nucleic acid binding	1
	zinc ion binding	1
C27A7.1	catalytic activity	1
C27A7.3	catalytic activity	1
C27A7.4	protein binding	1
C27A7.5	asparaginase activity	1
C27B7.4	ATP binding	1
	DNA binding	1
	helicase activity	1
	nucleic acid binding	1
C27B7.8	GTP binding	1
	GTPase activity	1
	protein binding	1
C27C12.2	nucleic acid binding	1
	zinc ion binding	1
C27C12.6	DNA binding	1
	transcription factor activity	1
C27D11.1	translation regulator activity	1
C27D6.11	ATP binding	1
	protein kinase activity	1
	protein serine/threonine kinase activity	1
C27D6.4	protein dimerization activity	1
	sequence-specific DNA binding	1
	transcription factor activity	1
C27F2.2	ion channel activity	1
C27F2.4	methyltransferase activity	1
C27H5.1	3',5'-cyclic-nucleotide phosphodiesterase activity	1
	protein binding	1
C27H5.3	nucleic acid binding	1
	nucleotide binding	1
	zinc ion binding	1
C27H5.7	binding	1
C27H5.8	extracellular ligand-gated ion channel activity	1
	extracellular-glutamate-gated chloride channel activity	1
C27H6.1	protein binding	1
C27H6.2	ATP binding	1
	DNA helicase activity	1
	nucleoside-triphosphatase activity	1
	nucleotide binding	1
C27H6.4	binding	1
C28A5.3	calcium ion binding	1
	calcium-dependent phospholipid binding	1
	heparan sulfate proteoglycan binding	1
	heparin binding	1
	phosphatidylethanolamine binding	1
	phosphatidylinositol binding	1
	phosphatidylserine binding	1
C28A5.4	DNA binding	1
	sequence-specific DNA binding	1
	transcription factor activity	1
	transcription regulator activity	1
C28C12.10	phosphatidylinositol 3-phosphate binding	1
	Rho guanyl-nucleotide exchange factor activity	1
C28F5.4	catalytic activity	1
	metal ion binding	1
	metalloendopeptidase activity	1
	zinc ion binding	1
C28G1.1	small conjugating protein ligase activity	1
C28G1.5	protein binding	1
	zinc ion binding	1
C28G1.6	protein binding	1
	zinc ion binding	1
C28H8.11	iron ion binding	1
	oxidoreductase activity	1
	tryptophan 2,3-dioxygenase activity	1
C28H8.3	ATP binding	1
	ATP-dependent helicase activity	1
	DNA binding	1
	helicase activity	1
	hydrolase activity	1
	inorganic diphosphatase activity	1
	magnesium ion binding	1
	nucleic acid binding	1
C28H8.4	ER retention sequence binding	1
C28H8.6	zinc ion binding	1
C28H8.9	protein binding	1
	zinc ion binding	1
C29A12.3	ATP binding	1
	DNA binding	1
	DNA ligase (ATP) activity	1
C29E4.1	structural constituent of cuticle	1
C29E4.10	catalytic activity	1
	cation binding	1
	galactosylceramidase activity	1
C29E4.7	glutathione transferase activity	1
C29E4.8	adenylate kinase activity	1
	ATP binding	1
	nucleobase, nucleoside, nucleotide kinase activity	1
	nucleotide kinase activity	1
	phosphotransferase activity, phosphate group as acceptor	1
C29E6.2	ion channel activity	1
C29F3.1	3-hydroxyacyl-CoA dehydrogenase activity	1
	binding	1
	catalytic activity	1
	coenzyme binding	1
	enoyl-CoA hydratase activity	1
	oxidoreductase activity	1
C29F3.2	peptidase activity	1
C29F4.1	structural constituent of cuticle	1
C29F7.3	ATP binding	1
	nucleobase, nucleoside, nucleotide kinase activity	1
	nucleotide kinase activity	1
	phosphotransferase activity, phosphate group as acceptor	1
C29F9.7	ATP binding	1
	integrin binding	1
	protein kinase activity	1
	protein serine/threonine kinase activity	1
C29H12.1	aminoacyl-tRNA ligase activity	1
	arginine-tRNA ligase activity	1
	ATP binding	1
	nucleotide binding	1
C29H12.2	sugar:hydrogen symporter activity	1
C30A5.3	protein binding	1
C30A5.7	DNA binding	1
	sequence-specific DNA binding	1
	transcription factor activity	1
	transcription regulator activity	1
C30B5.3	nucleic acid binding	1
	nucleotide binding	1
C30B5.4	nucleic acid binding	1
	nucleotide binding	1
C30C11.1	structural constituent of ribosome	1
C30C11.2	enzyme regulator activity	1
C30C11.4	ATP binding	1
C30D11.1	ion channel activity	1
	voltage-gated potassium channel activity	1
C30F12.2	ATP binding	1
C30F12.7	isocitrate dehydrogenase (NAD+) activity	1
	magnesium ion binding	1
	NAD or NADH binding	1
	oxidoreductase activity, acting on the CH-OH group of donors, NAD or NADP as acceptor	1
C30F8.2	hydrogen ion transmembrane transporter activity	1
C30F8.4	ATP binding	1
	protein binding	1
	protein kinase activity	1
	protein serine/threonine kinase activity	1
	protein tyrosine kinase activity	1
	signal transducer activity	1
C30G12.7	binding	1
	RNA binding	1
C30G4.7	transcription factor activity	1
C30G7.1	DNA binding	1
C30H6.1	binding	1
C30H6.2	metal ion transmembrane transporter activity	1
C30H6.6	ATP binding	1
	ATPase activity	1
	ATPase activity, coupled to transmembrane movement of substances	1
	nucleoside-triphosphatase activity	1
	nucleotide binding	1
C30H6.7	acyltransferase activity	1
C30H6.8	antioxidant activity	1
	oxidoreductase activity	1
C30H7.2	calcium ion binding	1
C31B8.8	calcium ion binding	1
	metalloendopeptidase activity	1
	metallopeptidase activity	1
	zinc ion binding	1
C31C9.2	binding	1
	catalytic activity	1
	cofactor binding	1
	ketol-acid reductoisomerase activity	1
	NAD or NADH binding	1
	oxidoreductase activity, acting on the CH-OH group of donors, NAD or NADP as acceptor	1
	phosphogluconate dehydrogenase (decarboxylating) activity	1
C31E10.7	heme binding	1
C31E10.8	ATP binding	1
	Rab GTPase activator activity	1
	transmembrane receptor protein tyrosine kinase activity	1
C31H2.1	Rab GTPase activator activity	1
C31H2.4	4-hydroxyphenylpyruvate dioxygenase activity	1
C31H5.3	extracellular ligand-gated ion channel activity	1
	ion channel activity	1
	nicotinic acetylcholine-activated cation-selective channel activity	1
C31H5.6	palmitoyl-CoA hydrolase activity	1
	thiolester hydrolase activity	1
C32B5.13	cysteine-type peptidase activity	1
C32B5.7	cysteine-type peptidase activity	1
C32C4.1	ion channel activity	1
	protein binding	1
	voltage-gated potassium channel activity	1
C32C4.2	transporter activity	1
	water channel activity	1
C32C4.7	carbohydrate binding	1
	transferase activity, transferring hexosyl groups	1
C32D5.2	ATP binding	1
	protein kinase activity	1
	protein serine/threonine kinase activity	1
	receptor signaling protein serine/threonine kinase activity	1
	transforming growth factor beta receptor activity	1
	transmembrane receptor protein serine/threonine kinase activity	1
C32D5.8	antioxidant activity	1
	oxidoreductase activity	1
C32E12.2	3',5'-cyclic-nucleotide phosphodiesterase activity	1
	catalytic activity	1
C32E12.5	DNA binding	1
C32E8.10	clathrin binding	1
	phosphatidylinositol binding	1
	phospholipid binding	1
C32E8.11	ubiquitin-protein ligase activity	1
	zinc ion binding	1
C32E8.2	structural constituent of ribosome	1
C32E8.8	hedgehog receptor activity	1
	transporter activity	1
C32E8.9	catalytic activity	1
C32F10.5	DNA binding	1
C32F10.8	1-aminocyclopropane-1-carboxylate synthase activity	1
	catalytic activity	1
	pyridoxal phosphate binding	1
	transferase activity, transferring nitrogenous groups	1
C33A11.4	sequence-specific DNA binding	1
	transcription factor activity	1
C33A12.1	oxidoreductase activity, acting on NADH or NADPH	1
C33A12.6	carbohydrate binding	1
	transferase activity, transferring hexosyl groups	1
C33A12.7	hydrolase activity	1
C33B4.3	protein binding	1
C33C12.3	catalytic activity	1
	cation binding	1
	glucosylceramidase activity	1
C33C12.8	catalytic activity	1
	cation binding	1
	glucosylceramidase activity	1
C33C12.9	methyltransferase activity	1
	nucleic acid binding	1
	protein methyltransferase activity	1
C33D12.1	DNA binding	1
	sequence-specific DNA binding	1
	transcription factor activity	1
	transcription regulator activity	1
C33D12.6	calcium ion binding	1
	GTP binding	1
	GTPase activity	1
	protein binding	1
	structural constituent of ribosome	1
C33D12.7	DNA binding	1
	sequence-specific DNA binding	1
	transcription factor activity	1
	transcription regulator activity	1
C33D9.1	guanyl-nucleotide exchange factor activity	1
	Rho guanyl-nucleotide exchange factor activity	1
C33E10.10	binding	1
	catalytic activity	1
	oxidoreductase activity	1
C33F10.12	binding	1
C33F10.14	3-beta-hydroxy-delta5-steroid dehydrogenase activity	1
	binding	1
	catalytic activity	1
	coenzyme binding	1
	NAD or NADH binding	1
	oxidoreductase activity, acting on the aldehyde or oxo group of donors, NAD or NADP as acceptor	1
C33F10.2	ATP binding	1
	protein kinase activity	1
	protein serine/threonine kinase activity	1
	Rab GTPase activator activity	1
C33F10.5	binding	1
C33G3.1	protein binding	1
	structural constituent of muscle	1
C33G3.4	catalytic activity	1
	cation binding	1
	hydrolase activity, hydrolyzing O-glycosyl compounds	1
C33H5.12	nucleic acid binding	1
	nucleotide binding	1
	RNA binding	1
C33H5.14	hydrolase activity	1
C33H5.17	nucleic acid binding	1
C33H5.18	transferase activity, transferring phosphorus-containing groups	1
C33H5.4	ATP binding	1
	microtubule motor activity	1
C33H5.8	binding	1
C34B2.10	peptidase activity	1
C34B2.4	zinc ion binding	1
C34B2.5	binding	1
C34B2.6	ATP binding	1
	ATP-dependent peptidase activity	1
	ATPase activity	1
	nucleoside-triphosphatase activity	1
	nucleotide binding	1
	serine-type endopeptidase activity	1
C34B2.7	electron carrier activity	1
	FAD binding	1
	oxidoreductase activity	1
	oxidoreductase activity, acting on the CH-CH group of donors	1
C34B4.1	binding	1
C34B7.3	electron carrier activity	1
	heme binding	1
	iron ion binding	1
	monooxygenase activity	1
C34B7.4	protein binding	1
	transferase activity, transferring acyl groups other than amino-acyl groups	1
	zinc ion binding	1
C34C12.3	hydrolase activity	1
C34C12.5	protein binding	1
C34C12.8	adenyl-nucleotide exchange factor activity	1
	chaperone binding	1
	protein binding	1
	protein homodimerization activity	1
C34C6.4	FAD binding	1
	oxidoreductase activity, acting on CH-OH group of donors	1
C34C6.5	diacylglycerol kinase activity	1
C34C6.6	binding	1
	peroxisome targeting sequence binding	1
C34C6.8	DNA binding	1
	sequence-specific DNA binding	1
	transcription factor activity	1
	transcription regulator activity	1
C34D1.3	GTP binding	1
	guanyl nucleotide binding	1
	signal transducer activity	1
C34D10.1	structural molecule activity	1
C34D4.12	peptidyl-prolyl cis-trans isomerase activity	1
C34D4.14	acid-amino acid ligase activity	1
	binding	1
	metal ion binding	1
	ubiquitin-protein ligase activity	1
C34D4.15	structural constituent of cuticle	1
C34D4.9	metalloendopeptidase activity	1
	metallopeptidase activity	1
	zinc ion binding	1
C34E10.2	GTP binding	1
	GTPase activity	1
	nucleotide binding	1
C34E10.4	aminoacyl-tRNA ligase activity	1
	ATP binding	1
	nucleotide binding	1
	protein binding	1
	tryptophan-tRNA ligase activity	1
	zinc ion binding	1
C34E10.5	histone methyltransferase activity (H4-R3 specific)	1
	methyltransferase activity	1
	p53 binding	1
	transcription activator binding	1
C34E10.6	hydrogen ion transporting ATP synthase activity, rotational mechanism	1
	hydrogen-exporting ATPase activity, phosphorylative mechanism	1
	hydrolase activity, acting on acid anhydrides, catalyzing transmembrane movement of substances	1
	nucleoside-triphosphatase activity	1
	nucleotide binding	1
	protein domain specific binding	1
	proton-transporting ATPase activity, rotational mechanism	1
C34E10.7	transcription factor activity	1
	transcription regulator activity	1
C34E11.1	phospholipid binding	1
C34F11.3	AMP deaminase activity	1
	deaminase activity	1
	hydrolase activity, acting on carbon-nitrogen (but not peptide) bonds, in cyclic amidines	1
C34F11.9	protein binding	1
	signal transducer activity	1
C34F6.2	structural constituent of cuticle	1
C34F6.3	structural constituent of cuticle	1
C34F6.4	sulfotransferase activity	1
C34F6.8	isocitrate dehydrogenase (NADP+) activity	1
	magnesium ion binding	1
	NAD or NADH binding	1
	oxidoreductase activity, acting on the CH-OH group of donors, NAD or NADP as acceptor	1
C34G6.1	binding	1
C34G6.4	ATP binding	1
	ATPase activity	1
	ATPase activity, coupled to transmembrane movement of substances	1
	nucleoside-triphosphatase activity	1
	nucleotide binding	1
C34G6.5	ATP binding	1
	protein kinase activity	1
	protein serine/threonine kinase activity	1
C34G6.7	protein C-terminus binding	1
C34H3.1	metalloendopeptidase activity	1
C34H3.2	nucleic acid binding	1
	zinc ion binding	1
C34H4.4	structural constituent of cuticle	1
C34H4.5	zinc ion binding	1
C35A11.4	substrate-specific transmembrane transporter activity	1
	transporter activity	1
C35A5.1	transporter activity	1
C35A5.2	carbohydrate binding	1
	transferase activity, transferring hexosyl groups	1
C35A5.9	protein deacetylase activity	1
C35B1.1	damaged DNA binding	1
	small conjugating protein ligase activity	1
	ubiquitin-protein ligase activity	1
C35B1.5	oxidoreductase activity	1
C35B8.1	structural constituent of cuticle	1
C35B8.2	guanyl-nucleotide exchange factor activity	1
	phosphoinositide 3-kinase regulator activity	1
	protein binding	1
	Rho guanyl-nucleotide exchange factor activity	1
C35C5.11	peptidase activity	1
C35C5.2	peptidase activity	1
C35C5.3	selenium binding	1
C35C5.4	GTP binding	1
	GTPase activity	1
C35D10.12	methyltransferase activity	1
C35D10.14	binding	1
C35D10.15	binding	1
C35D10.2	protein binding	1
C35D10.6	oxidoreductase activity	1
C36A4.1	electron carrier activity	1
	heme binding	1
	iron ion binding	1
	monooxygenase activity	1
C36A4.2	electron carrier activity	1
	heme binding	1
	iron ion binding	1
	monooxygenase activity	1
C36A4.3	electron carrier activity	1
	heme binding	1
	iron ion binding	1
	monooxygenase activity	1
C36A4.4	nucleotidyltransferase activity	1
C36A4.6	electron carrier activity	1
	heme binding	1
	iron ion binding	1
	monooxygenase activity	1
C36A4.9	acetate-CoA ligase activity	1
	AMP binding	1
	catalytic activity	1
C36B1.1	binding	1
	structural molecule activity	1
C36B1.12	aspartic-type endopeptidase activity	1
C36B1.3	DNA-directed RNA polymerase activity	1
	protein dimerization activity	1
C36B1.4	endopeptidase activity	1
	threonine-type endopeptidase activity	1
C36B1.7	dihydrofolate reductase activity	1
	NADP or NADPH binding	1
C36E6.1	RNA binding	1
C36E6.3	calcium ion binding	1
C36E6.5	calcium ion binding	1
C36E8.5	GTP binding	1
	GTPase activity	1
	structural molecule activity	1
C36F7.1	DNA binding	1
	sequence-specific DNA binding	1
	transcription factor activity	1
	transcription regulator activity	1
C37A2.4	cyclin-dependent protein kinase regulator activity	1
C37A2.6	methyltransferase activity	1
	protein methyltransferase activity	1
C37A2.7	structural constituent of ribosome	1
C37C3.2	translation initiation factor activity	1
C37C3.6	metalloendopeptidase activity	1
	metallopeptidase activity	1
	peptidase activity	1
	serine-type endopeptidase inhibitor activity	1
	zinc ion binding	1
C37E2.1	isocitrate dehydrogenase (NAD+) activity	1
	magnesium ion binding	1
	NAD or NADH binding	1
	oxidoreductase activity, acting on the CH-OH group of donors, NAD or NADP as acceptor	1
C37E2.4	DNA binding	1
	sequence-specific DNA binding	1
	transcription factor activity	1
C37E2.5	DNA binding	1
	sequence-specific DNA binding	1
	telomeric DNA binding	1
	transcription factor activity	1
	transcription regulator activity	1
C37F5.1	sequence-specific DNA binding	1
	transcription factor activity	1
C37H5.1	calcium ion binding	1
	calcium-dependent phospholipid binding	1
C37H5.13	acyl-CoA thioesterase activity	1
C37H5.6	adenylosuccinate synthase activity	1
	GTP binding	1
	magnesium ion binding	1
C37H5.8	ATP binding	1
	unfolded protein binding	1
C38C10.5	RNA polymerase II transcription mediator activity	1
C38C3.5	actin binding	1
	actin filament binding	1
C38C6.2	catalytic activity	1
	cation binding	1
C38D4.5	protein binding	1
C38D4.6	DNA binding	1
	RNA polymerase II transcription factor activity	1
	RNA polymerase II transcription factor activity, enhancer binding	1
	sequence-specific DNA binding	1
	transcription factor activity	1
	transcription regulator activity	1
C38D4.8	GTP binding	1
	GTPase activity	1
	guanyl nucleotide binding	1
[truncated: 9,687 more rows]

## Sheet: B) mf-focused report
Count of Gene ID
GO Term	Gene ID	Total
1-acylglycerol-3-phosphate O-acyltransferase activity	F59F4.4	1
	T06E8.1	1
1-acylglycerol-3-phosphate O-acyltransferase activity Total		2
1-alkyl-2-acetylglycerophosphocholine esterase activity	C52B9.7	1
	W03G9.6	1
1-alkyl-2-acetylglycerophosphocholine esterase activity Total		2
1-aminocyclopropane-1-carboxylate synthase activity	C32F10.8	1
	F28H6.3	1
	F42D1.2	1
	R03A10.4	1
	T04F3.1	1
1-aminocyclopropane-1-carboxylate synthase activity Total		5
1-phosphatidylinositol-3-kinase activity	B0025.1	1
	B0261.2	1
	B0334.8	1
	C48B6.6	1
	F39B1.1	1
	T06E4.3	1
1-phosphatidylinositol-3-kinase activity Total		6
1-pyrroline-5-carboxylate dehydrogenase activity	F56D12.1	1
1-pyrroline-5-carboxylate dehydrogenase activity Total		1
2 iron, 2 sulfur cluster binding	F20D6.11	1
	F42G8.12	1
	M88.7	1
	W02B12.15	1
	Y67D2.3	1
	Y73F8A.27	1
2 iron, 2 sulfur cluster binding Total		6
2-nitropropane dioxygenase activity	F41E6.5	1
	T22D1.3	1
2-nitropropane dioxygenase activity Total		2
2-polyprenyl-6-methoxy-1,4-benzoquinone methyltransferase activity	Y57G11C.11	1
2-polyprenyl-6-methoxy-1,4-benzoquinone methyltransferase activity Total		1
2,3-dihydro-2,3-dihydroxybenzoate dehydrogenase activity	C01G12.5	1
	C06E4.3	1
	C06E4.6	1
	D1054.8	1
	F01G4.2	1
	F02C12.2	1
	F09E10.3	1
	F12E12.11	1
	F25D1.5	1
	F26D2.15	1
	F28H7.2	1
	F36H9.3	1
	F53C11.3	1
	F54F3.4	1
	F55E10.6	1
	R05D8.10	1
	R05D8.7	1
	R05D8.8	1
	R05D8.9	1
	R08H2.1	1
	R119.3	1
	R11D1.11	1
	T01G6.1	1
	T01G6.10	1
	T05C12.3	1
	T05F1.10	1
	T11F9.11	1
	W03F9.9	1
	Y39A1A.11	1
	Y47G6A.21	1
	Y47G6A.22	1
	ZK829.1	1
2,3-dihydro-2,3-dihydroxybenzoate dehydrogenase activity Total		32
2',3'-cyclic-nucleotide 3'-phosphodiesterase activity	F26A1.14	1
2',3'-cyclic-nucleotide 3'-phosphodiesterase activity Total		1
21U-RNA binding	D2030.6	1
21U-RNA binding Total		1
3-beta-hydroxy-delta5-steroid dehydrogenase activity	C01F1.3	1
	C33F10.14	1
	C47B2.6	1
	D2096.4	1
	F08F3.4	1
	F27D9.6	1
	F53B1.4	1
	Y53G8AL.2	1
	Y6B3B.11	1
	Y71H10A.2	1
	ZC449.6	1
	ZC8.1	1
3-beta-hydroxy-delta5-steroid dehydrogenase activity Total		12
3-dehydroquinate synthase activity	Y38F1A.6	1
3-dehydroquinate synthase activity Total		1
3-hydroxyacyl-CoA dehydrogenase activity	C29F3.1	1
	T08B2.7	1
3-hydroxyacyl-CoA dehydrogenase activity Total		2
3-hydroxyanthranilate 3,4-dioxygenase activity	K06A4.5	1
3-hydroxyanthranilate 3,4-dioxygenase activity Total		1
3-hydroxyisobutyrate dehydrogenase activity	B0250.5	1
3-hydroxyisobutyrate dehydrogenase activity Total		1
3-oxo-5-alpha-steroid 4-dehydrogenase activity	F19H6.4	1
	F42F12.3	1
	ZK1251.3	1
3-oxo-5-alpha-steroid 4-dehydrogenase activity Total		3
3-oxoacyl-[acyl-carrier-protein] synthase activity	T02G5.7	1
3-oxoacyl-[acyl-carrier-protein] synthase activity Total		1
3'-5' exonuclease activity	C10G6.1	1
	C14A4.4	1
	C14A4.5	1
	F39H2.5	1
	Y57A10A.13	1
	ZK1098.3	1
	ZK1098.8	1
3'-5' exonuclease activity Total		7
3'-5'-exoribonuclease activity	B0564.1	1
	BE0003N10.1	1
	C14A4.5	1
	F31D4.1	1
	F37C12.13	1
	T07A9.5	1
	Y6D11A.1	1
3'-5'-exoribonuclease activity Total		7
3',5'-cyclic-nucleotide phosphodiesterase activity	C27H5.1	1
	C32E12.2	1
	E01F3.1	1
	R08D7.6	1
	R153.1	1
	T04D3.3	1
	Y95B8A.10	1
3',5'-cyclic-nucleotide phosphodiesterase activity Total		7
4 iron, 4 sulfur cluster binding	C09H10.3	1
	F25B5.5	1
	F49E2.1	1
	F49H6.5	1
	F54H12.1	1
	M01F1.3	1
	T20H4.5	1
	Y92H12BL.1	1
	Y92H12BL.4	1
	ZK455.1	1
4 iron, 4 sulfur cluster binding Total		10
4-alpha-glucanotransferase activity	R06A4.8	1
4-alpha-glucanotransferase activity Total		1
4-alpha-hydroxytetrahydrobiopterin dehydratase activity	T10B11.1	1
4-alpha-hydroxytetrahydrobiopterin dehydratase activity Total		1
4-aminobutyrate transaminase activity	K04D7.3	1
4-aminobutyrate transaminase activity Total		1
4-hydroxyphenylpyruvate dioxygenase activity	C31H2.4	1
	T21C12.2	1
4-hydroxyphenylpyruvate dioxygenase activity Total		2
5-formyltetrahydrofolate cyclo-ligase activity	Y106G6E.4	1
5-formyltetrahydrofolate cyclo-ligase activity Total		1
5-formyluracil DNA N-glycosylase activity	R10E4.5	1
5-formyluracil DNA N-glycosylase activity Total		1
5-hydroxymethyluracil DNA N-glycosylase activity	R10E4.5	1
5-hydroxymethyluracil DNA N-glycosylase activity Total		1
5'-3' exonuclease activity	Y39G8C.1	1
5'-3' exonuclease activity Total		1
5'-3' exoribonuclease activity	Y48B6A.3	1
5'-3' exoribonuclease activity Total		1
5'-nucleotidase activity	F25B5.3	1
	Y10G11A.1	1
5'-nucleotidase activity Total		2
5S rRNA binding	F54C9.5	1
5S rRNA binding Total		1
6-phosphofructo-2-kinase activity	K02B2.1	1
	Y110A7A.6	1
6-phosphofructo-2-kinase activity Total		2
6-phosphofructokinase activity	C50F4.2	1
	Y71H10A.1	1
6-phosphofructokinase activity Total		2
6-phosphogluconolactonase activity	Y57G11C.3	1
6-phosphogluconolactonase activity Total		1
6-pyruvoyltetrahydropterin synthase activity	B0041.6	1
6-pyruvoyltetrahydropterin synthase activity Total		1
7S RNA binding	F08D12.1	1
	F21D5.7	1
	F25G6.8	1
	F37F2.2	1
	ZK512.4	1
7S RNA binding Total		5
acetate-CoA ligase activity	C36A4.9	1
acetate-CoA ligase activity Total		1
acetoacetate-CoA ligase activity	K03A1.5	1
acetoacetate-CoA ligase activity Total		1
acetyl-CoA carboxylase activity	T28F3.5	1
	W09B6.1	1
acetyl-CoA carboxylase activity Total		2
acetylcholine receptor activity	D2092.3	1
	F09E8.7	1
	F21F3.5	1
	F25G6.4	1
	F59B1.9	1
	K11G12.2	1
	K11G12.7	1
	T08G11.5	1
	Y110A7A.3	1
acetylcholine receptor activity Total		9
acetylcholine receptor binding	C18H9.7	1
acetylcholine receptor binding Total		1
acetylcholine transmembrane transporter activity	ZC416.8	1
acetylcholine transmembrane transporter activity Total		1
acetylcholine-gated cation channel activity	F09E8.7	1
	Y110A7A.3	1
acetylcholine-gated cation channel activity Total		2
acetylcholinesterase activity	W09B12.1	1
	Y44E3A.2	1
	Y48B6A.8	1
acetylcholinesterase activity Total		3
acetylglucosaminyltransferase activity	C54C8.11	1
	F22D6.11	1
	F22D6.12	1
	F26D2.3	1
	F30A10.4	1
	F35H8.2	1
	F44F4.6	1
	H41C03.3	1
	R07B7.6	1
	R07C3.3	1
	T09E11.6	1
	T09E11.9	1
	T14B4.9	1
	T15D6.2	1
	T15D6.3	1
	T27F6.1	1
	T28F3.9	1
	Y50D4C.4	1
	Y51H4A.25	1
	ZK1225.2	1
acetylglucosaminyltransferase activity Total		20
acid phosphatase activity	B0361.7	1
	C05C10.1	1
	C05C10.4	1
	C08B6.14	1
	C27A2.4	1
	EGAP2.3	1
	F07H5.9	1
	F13D11.1	1
	F14E5.3	1
	F14E5.4	1
	F14E5.6	1
	F18E2.1	1
	F21A3.2	1
	F26C11.1	1
	F46F11.1	1
	H25K10.1	1
	R13H4.3	1
	T13B5.3	1
	T16D1.2	1
	T21B6.2	1
	Y105C5B.15	1
	Y105C5B.3	1
	Y71H2AM.16	1
	Y94H6A.7	1
	ZK563.6	1
	ZK792.1	1
acid phosphatase activity Total		26
acid-amino acid ligase activity	C34D4.14	1
	D2085.4	1
	F36A2.13	1
	F45H7.6	1
	K08E3.7	1
	Y39A1C.2	1
	Y48G8AL.1	1
	Y65B4BR.4	1
	Y67D8C.5	1
	Y92H12A.2	1
acid-amino acid ligase activity Total		10
acireductone synthase activity	F58H1.3	1
acireductone synthase activity Total		1
aconitate hydratase activity	F54H12.1	1
	ZK455.1	1
aconitate hydratase activity Total		2
actin binding	B0523.5	1
	C04F6.4	1
	C10H11.1	1
	C18E3.6	1
	C38C3.5	1
	C46H11.11	1
	D2024.6	1
	F08F1.8	1
	F09B9.2	1
	F11H8.4	1
	F15D3.1	1
	F38E9.5	1
	F41G4.2	1
	F56E10.2	1
	F58B6.2	1
	K03E6.6	1
	K06A4.3	1
	K08E3.4	1
	K11C4.3	1
	M106.5	1
	M116.5	1
	R31.1	1
	W04D2.1	1
	Y104H12BR.1	1
	Y18D10A.20	1
	Y48G9A.4	1
	Y50D7A.10	1
	Y71G12B.11	1
	Y79H2A.6	1
	ZC416.6	1
	ZK1151.1	1
	ZK370.3	1
	ZK973.6	1
actin binding Total		33
actin filament binding	C38C3.5	1
	F09B9.2	1
	F45E10.1	1
	K06A4.3	1
	M106.5	1
	R13H4.4	1
	Y105E8B.1	1
	Y76A2B.1	1
	ZK1010.3	1
actin filament binding Total		9
actin monomer binding	K06A4.3	1
actin monomer binding Total		1
acyl carrier activity	Y56A3A.19	1
acyl carrier activity Total		1
acyl-CoA binding	C18D11.2	1
	C44E4.6	1
	F47B10.7	1
	F56C9.5	1
	R06F6.9	1
	T12D8.3	1
	Y17G7B.1	1
	Y41E3.7	1
acyl-CoA binding Total		8
acyl-CoA dehydrogenase activity	C02B10.1	1
	C17C3.12	1
	C48B4.1	1
	C55B7.4	1
	E04F6.5	1
	F08A8.1	1
	F08A8.2	1
	F08A8.3	1
	F08A8.4	1
	F25C8.1	1
	F28A10.6	1
	F54D5.7	1
	F58F9.7	1
	F59F4.1	1
	K04D7.5	1
	K05F1.3	1
	K06A5.6	1
	K09H11.1	1
	T08B1.3	1
	T08G2.3	1
	T10E9.9	1
	T25G12.5	1
	Y76B12C.6	1
acyl-CoA dehydrogenase activity Total		23
acyl-CoA oxidase activity	C48B4.1	1
	F08A8.1	1
	F08A8.2	1
	F08A8.3	1
	F08A8.4	1
	F25C8.1	1
	F58F9.7	1
	F59F4.1	1
acyl-CoA oxidase activity Total		8
acyl-CoA thioesterase activity	C17C3.1	1
	C17C3.3	1
	C37H5.13	1
	F25E2.3	1
	Y87G2A.2	1
acyl-CoA thioesterase activity Total		5
acyltransferase activity	B0395.3	1
	C01C10.3	1
	C30H6.7	1
	F08F3.2	1
	F08G5.2	1
	F14F3.3	1
	F23B12.5	1
	F28B3.9	1
	F41E7.6	1
	F44B9.5	1
	F49H12.6	1
	F55A11.5	1
	F59F4.4	1
	K07B1.5	1
	R07E3.5	1
	R07H5.2	1
	T05H4.1	1
	T06E8.1	1
	T20B3.1	1
	W02F12.5	1
	Y46G5A.17	1
	Y46G5A.21	1
	ZC416.8	1
	ZK40.1	1
	ZK669.4	1
	ZK809.2	1
acyltransferase activity Total		26
adenine phosphoribosyltransferase activity	T19B4.3	1
adenine phosphoribosyltransferase activity Total		1
adenosine deaminase activity	C06G3.5	1
	T20H4.4	1
adenosine deaminase activity Total		2
adenosine kinase activity	R07H5.8	1
adenosine kinase activity Total		1
adenosine-diphosphatase activity	R07E4.4	1
adenosine-diphosphatase activity Total		1
adenosylhomocysteinase activity	K02F2.2	1
adenosylhomocysteinase activity Total		1
adenosylmethionine decarboxylase activity	F47G4.7	1
adenosylmethionine decarboxylase activity Total		1
adenyl-nucleotide exchange factor activity	C34C12.8	1
adenyl-nucleotide exchange factor activity Total		1
adenylate cyclase activity	C10F3.3	1
	C44F1.5	1
	F17C8.1	1
	T01C2.1	1
adenylate cyclase activity Total		4
adenylate kinase activity	C29E4.8	1
	F38B2.4	1
	ZK673.2	1
adenylate kinase activity Total		3
adenylosuccinate synthase activity	C37H5.6	1
adenylosuccinate synthase activity Total		1
alanine-tRNA ligase activity	F28H1.3	1
	W02B12.6	1
alanine-tRNA ligase activity Total		2
alcohol dehydrogenase (NAD) activity	C06B3.4	1
	C06B3.5	1
	C56G2.6	1
	F09E10.3	1
	R11D1.11	1
	T01G6.1	1
	T01G6.10	1
	Y47G6A.21	1
	Y47G6A.22	1
alcohol dehydrogenase (NAD) activity Total		9
aldehyde dehydrogenase [NAD(P)+] activity	T05H4.13	1
	T08B1.3	1
aldehyde dehydrogenase [NAD(P)+] activity Total		2
alpha-1,3-mannosylglycoprotein 2-beta-N-acetylglucosaminyltransferase activity	B0416.6	1
	F48E3.1	1
	M01F1.1	1
alpha-1,3-mannosylglycoprotein 2-beta-N-acetylglucosaminyltransferase activity Total		3
alpha-1,6-mannosylglycoprotein 2-beta-N-acetylglucosaminyltransferase activity	C03E10.4	1
alpha-1,6-mannosylglycoprotein 2-beta-N-acetylglucosaminyltransferase activity Total		1
alpha-amino-3-hydroxy-5-methyl-4-isoxazole propionate selective glutamate receptor activity	C06E1.4	1
alpha-amino-3-hydroxy-5-methyl-4-isoxazole propionate selective glutamate receptor activity Total		1
alpha-catenin binding	K05C4.6	1
alpha-catenin binding Total		1
alpha-L-fucosidase activity	W03G11.3	1
alpha-L-fucosidase activity Total		1
alpha-mannosidase activity	F48C1.1	1
	F55D10.1	1
	F58H1.1	1
alpha-mannosidase activity Total		3
alpha,alpha-trehalase activity	C23H3.7	1
	F15A2.2	1
	F57B10.7	1
	T05A12.2	1
	W05E10.4	1
alpha,alpha-trehalase activity Total		5
alpha(1,3)-fucosyltransferase activity	K08F8.3	1
alpha(1,3)-fucosyltransferase activity Total		1
amidophosphoribosyltransferase activity	T04A8.5	1
amidophosphoribosyltransferase activity Total		1
amiloride-sensitive sodium channel activity	F16F9.5	1
	T01C8.7	1
amiloride-sensitive sodium channel activity Total		2
amine binding	F59C12.2	1
amine binding Total		1
amine transmembrane transporter activity	T23G5.5	1
amine transmembrane transporter activity Total		1
amino acid binding	D2085.1	1
	K01C8.1	1
	K08F8.4	1
amino acid binding Total		3
amino acid transmembrane transporter activity	B0454.6	1
	C50D2.2	1
	F07C3.7	1
	F23F1.6	1
	F27C8.1	1
	F52H2.2	1
amino acid transmembrane transporter activity Total		6
aminoacyl-tRNA hydrolase activity	C24G6.8	1
aminoacyl-tRNA hydrolase activity Total		1
aminoacyl-tRNA ligase activity	B0464.1	1
	C18C4.3	1
	C25A1.7	1
	C29H12.1	1
	C34E10.4	1
	C47D12.6	1
	C47E12.1	1
	F10C2.6	1
	F11C7.4	1
	F22D6.3	1
	F26F4.10	1
	F36H1.2	1
	F58B3.5	1
	K08F11.4	1
	R11A8.6	1
	R74.1	1
	T02G5.9	1
	T07A9.2	1
	T08B2.9	1
	T10F2.1	1
	T11G6.1	1
	T18D3.7	1
	T20H4.3	1
	T27F6.5	1
	W03B1.4	1
	Y105E8A.19	1
	Y105E8A.20	1
	Y41E3.4	1
	Y43F8C.6	1
	Y66D12A.23	1
	Y80D3A.1	1
	Y87G2A.5	1
	ZC434.5	1
	ZC434.9	1
	ZK384.3	1
	ZK524.3	1
aminoacyl-tRNA ligase activity Total		36
aminoacylase activity	C06A6.4	1
	C10C5.3	1
	C10C5.4	1
	C10C5.5	1
aminoacylase activity Total		4
aminomethyltransferase activity	F25B4.1	1
	F39H2.3	1
	Y106G6H.5	1
	Y37E3.17	1
aminomethyltransferase activity Total		4
aminopeptidase activity	F01F1.9	1
	K12C11.1	1
	R119.2	1
	Y116A8A.9	1
	Y37E11AL.7	1
	ZK353.6	1
aminopeptidase activity Total		6
ammonia-lyase activity	F47B10.2	1
ammonia-lyase activity Total		1
ammonium transmembrane transporter activity	B0240.1	1
	F08F3.3	1
ammonium transmembrane transporter activity Total		2
AMP binding	C36A4.9	1
AMP binding Total		1
AMP deaminase activity	C34F11.3	1
AMP deaminase activity Total		1
amylo-alpha-1,6-glucosidase activity	F57B10.7	1
	R06A4.8	1
amylo-alpha-1,6-glucosidase activity Total		2
anion exchanger activity	F52B5.1	1
	F52D10.1	1
	F57F10.1	1
	R03E9.3	1
anion exchanger activity Total		4
anion transmembrane transporter activity	F52B5.1	1
	R03E9.3	1
anion transmembrane transporter activity Total		2
ankyrin binding	C18F3.2	1
ankyrin binding Total		1
antioxidant activity	C11E4.1	1
	C11E4.2	1
	C30H6.8	1
	C32D5.8	1
	F09E5.15	1
	F26E4.12	1
	F29B9.5	1
	K02H11.6	1
	M01H9.1	1
	R05H10.5	1
	R05H5.3	1
	R07E5.2	1
	T09A12.2	1
	T20D4.7	1
	T28A11.13	1
	Y38C1AA.11	1
	Y44E3A.3	1
	Y52E8A.3	1
	Y94H6A.4	1
antioxidant activity Total		19
ARF GTPase activator activity	F07F6.4	1
	F14F3.2	1
	K02B12.7	1
	W09D10.1	1
	Y17G7B.15	1
	Y39A1A.15	1
ARF GTPase activator activity Total		6
ARF guanyl-nucleotide exchange factor activity	C24H11.7	1
	K06H7.4	1
	M02B7.5	1
	Y106G6G.2	1
	Y55D9A.1	1
	Y6B3A.1	1
ARF guanyl-nucleotide exchange factor activity Total		6
arginine-tRNA ligase activity	C29H12.1	1
	F26F4.10	1
arginine-tRNA ligase activity Total		2
arginyltransferase activity	K07A1.9	1
arginyltransferase activity Total		1
aryl hydrocarbon receptor activity	C41G7.5	1
aryl hydrocarbon receptor activity Total		1
aryl hydrocarbon receptor nuclear translocator activity	C25A1.11	1
aryl hydrocarbon receptor nuclear translocator activity Total		1
arylesterase activity	E01A2.10	1
	E01A2.7	1
	K05F6.11	1
	W02D3.3	1
arylesterase activity Total		4
asparaginase activity	C27A7.5	1
asparaginase activity Total		1
asparagine synthase (glutamine-hydrolyzing) activity	B0035.16	1
	F25G6.6	1
	M02D8.4	1
	M106.4	1
	M18.3	1
asparagine synthase (glutamine-hydrolyzing) activity Total		5
asparagine-tRNA ligase activity	F22D6.3	1
asparagine-tRNA ligase activity Total		1
aspartate carbamoyltransferase activity	D2085.1	1
aspartate carbamoyltransferase activity Total		1
aspartate-tRNA ligase activity	B0464.1	1
	F10C2.6	1
	F22D6.3	1
	T02G5.9	1
	Y66D12A.23	1
aspartate-tRNA ligase activity Total		5
aspartic-type endopeptidase activity	C01G5.6	1
	C11D2.2	1
	C15C8.3	1
	C36B1.12	1
	DY3.6	1
	F21F8.2	1
	F21F8.3	1
	F21F8.4	1
	F21F8.7	1
	F23C8.4	1
	F28A12.4	1
	F59D6.2	1
	F59D6.3	1
	H22K11.1	1
	K07C5.8	1
	K10C2.3	1
	R12H7.2	1
	T05E11.5	1
	T18H9.2	1
	Y39B6A.20	1
	Y39B6A.22	1
	Y39B6A.23	1
	Y39B6A.24	1
	Y41G9A.1	1
	ZK384.3	1
	ZK384.6	1
aspartic-type endopeptidase activity Total		26
AT DNA binding	T20B12.2	1
AT DNA binding Total		1
ATP binding	B0001.4	1
	B0041.7	1
	B0205.7	1
	B0207.4	1
	B0218.3	1
	B0218.5	1
	B0222.9	1
	B0285.1	1
	B0286.3	1
	B0302.1	1
	B0365.1	1
	B0365.3	1
	B0414.2	1
	B0414.6	1
	B0414.7	1
	B0464.1	1
	B0464.5	1
	B0478.1	1
	B0495.2	1
	B0496.3	1
	B0511.4	1
	B0511.6	1
	B0545.1	1
	C01C4.3	1
	C01G12.8	1
	C01G6.8	1
	C01H6.9	1
	C02E7.1	1
	C03C10.1	1
	C03D6.3	1
	C04A11.3	1
	C04G6.1	1
	C04H5.6	1
	C05A9.1	1
	C05D10.2	1
	C05D10.3	1
	C05D2.1	1
	C05H8.1	1
	C06A1.1	1
	C06E1.10	1
	C06E7.1	1
	C06E7.3	1
	C06G3.2	1
	C07A9.3	1
	C07G1.3	1
	C07G2.3	1
	C07H6.1	1
	C07H6.5	1
	C08F8.2	1
	C08F8.6	1
	C08H9.5	1
	C09B8.7	1
	C09D1.1	1
	C09G4.2	1
	C09H5.2	1
	C10C6.1	1
	C10C6.5	1
	C10C6.6	1
	C10G11.5	1
	C10H11.9	1
	C11H1.4	1
	C12C8.1	1
	C12D8.10	1
	C14B9.4	1
	C14C11.6	1
	C15H9.6	1
	C16A3.1	1
	C16B8.1	1
	C16C10.12	1
	C16D9.2	1
	C18C4.2	1
	C18C4.3	1
	C18E9.11	1
	C18H7.4	1
	C24A1.3	1
	C24A8.4	1
	C24B5.2	1
	C24F3.4	1
	C24H12.4	1
	C25A1.7	1
	C25D7.6	1
	C25F6.4	1
	C26D10.2	1
	C26D10.4	1
	C26E6.11	1
	C27A2.1	1
	C27B7.4	1
	C27D6.11	1
	C27H6.2	1
	C28H8.3	1
	C29A12.3	1
	C29E4.8	1
	C29F7.3	1
	C29F9.7	1
	C29H12.1	1
	C30C11.4	1
	C30F12.2	1
	C30F8.4	1
	C30H6.6	1
	C31E10.8	1
	C32D5.2	1
	C33F10.2	1
	C33H5.4	1
	C34B2.6	1
	C34E10.4	1
	C34G6.4	1
	C34G6.5	1
	C37H5.8	1
	C39F7.4	1
	C41C4.4	1
	C41C4.8	1
	C41D11.7	1
	C41G7.2	1
	C42D8.3	1
	C43E11.10	1
	C44B7.8	1
	C44B7.9	1
	C44C8.6	1
	C45B11.1	1
	C46C2.1	1
	C46F11.4	1
	C47A10.1	1
	C47D12.6	1
	C47E12.1	1
	C47E12.5	1
	C47E8.5	1
	C48B4.4	1
	C49F5.1	1
	C50F7.4	1
	C52B9.8	1
	C52E12.2	1
	C52E4.4	1
	C54D1.1	1
	C54G10.2	1
	C54G10.3	1
	C54G4.1	1
	C55B7.1	1
	C56E6.2	1
	D1005.1	1
	D1037.4	1
	D1044.8	1
	D1073.1	1
	D2005.5	1
	D2023.2	1
	D2030.2	1
	D2030.8	1
	D2045.7	1
	D2085.1	1
	DC2.7	1
	DH11.3	1
	E01H11.1	1
	E02D9.1	1
	E02H1.6	1
	E02H4.3	1
	E03A3.2	1
	E03G2.2	1
	EEED8.5	1
	EEED8.9	1
	F01D4.3	1
	F01F1.7	1
	F01F1.8	1
	F01G4.1	1
	F01G4.3	1
	F02C9.3	1
	F02E11.1	1
	F08B1.2	1
	F09C12.2	1
	F09E5.1	1
	F09E8.3	1
	F10B5.5	1
	F10C2.6	1
	F10G8.6	1
	F11A10.1	1
	F11C1.5	1
	F11C3.3	1
	F11C7.4	1
	F11D5.3	1
	F11E6.8	1
	F11F1.1	1
	F11H8.1	1
	F12B6.1	1
	F13B9.5	1
	F13E6.2	1
	F14B4.2	1
	F14F4.3	1
	F14H12.4	1
	F15A2.6	1
	F15B10.2	1
	F15D4.1	1
	F17E5.1	1
	F18C12.1	1
	F18C5.2	1
	F18E2.2	1
	F18H3.5	1
	F19B6.1	1
	F19B6.4	1
	F19C6.1	1
	F19H6.1	1
	F20B6.3	1
	F20B6.8	1
	F20C5.2	1
	F20G4.3	1
	F21G4.2	1
	F22B5.9	1
	F22D6.1	1
	F22D6.3	1
	F22D6.5	1
	F22E10.1	1
	F22E10.2	1
	F22E10.3	1
	F22H10.5	1
	F23B12.8	1
	F23F1.8	1
	F23F12.6	1
	F25B5.6	1
	F25H2.13	1
	F25H2.5	1
	F26D10.3	1
	F26D11.1	1
	F26F12.7	1
	F26F4.10	1
	F27D9.5	1
	F28B12.3	1
	F28B3.7	1
	F28H1.3	1
	F28H6.1	1
	F29C4.1	1
	F29C4.6	1
	F29D10.4	1
	F29G9.5	1
	F31E3.2	1
	F31E3.3	1
	F32B6.2	1
	F32D1.1	1
	F32D1.10	1
	F32D8.1	1
	F33D11.10	1
	F33E2.2	1
	F33H2.1	1
	F35C8.1	1
	F35C8.2	1
	F35C8.3	1
	F35G12.3	1
	F35G12.8	1
	F35H8.7	1
	F36D4.3	1
	F36H1.2	1
	F36H2.1	1
	F37A4.8	1
	F38B2.4	1
	F38B6.4	1
	F39G3.7	1
	F39H11.3	1
	F40A3.5	1
	F40F8.1	1
	F41G3.5	1
	F42A10.1	1
	F42A10.4	1
	F42E11.1	1
	F42G10.2	1
	F42G8.3	1
	F42G8.4	1
	F43C1.2	1
	F43E2.4	1
	F43E2.8	1
	F43G6.1	1
	F44B9.8	1
	F44E5.4	1
	F44E5.5	1
	F45G2.2	1
	F45H7.4	1
	F46C3.1	1
	F46C3.3	1
	F46F2.2	1
	F46F6.2	1
	F46G11.1	1
	F46G11.3	1
	F47B10.1	1
	F47F2.1	1
	F47G6.4	1
	F49B2.5	1
	F49C5.4	1
	F49E11.1	1
	F52B10.1	1
	F52B5.3	1
	F52F12.3	1
	F53F10.4	1
	F53G12.1	1
	F53H1.1	1
	F53H4.1	1
	F53H4.6	1
	F54A3.3	1
	F54B3.3	1
	F54C9.2	1
	F54C9.6	1
	F54D5.14	1
	F54E12.2	1
	F55A3.6	1
	F55A8.2	1
	F55C5.7	1
	F55F10.1	1
	F55F8.2	1
	F55F8.3	1
	F55G1.8	1
	F56A6.2	1
	F56D2.6	1
	F56E3.3	1
	F56F11.4	1
	F56H1.4	1
	F57A10.3	1
	F57B9.3	1
	F57B9.6	1
	F57C12.4	1
	F57C12.5	1
	F57F5.5	1
	F58A3.2	1
	F58B3.5	1
	F58E10.3	1
	F58F6.4	1
	F58G11.2	1
	F58G4.1	1
	F59A6.1	1
	F59A7.8	1
	F59E12.2	1
	F59F3.1	1
	F59F3.5	1
	H01G02.2	1
	H06H21.10	1
	H06O01.2	1
	H12C20.2	1
	H15N14.2	1
	H20J04.4	1
	H25P06.2	1
	H26D21.2	1
	H27M09.1	1
	H37N21.1	1
	H39E23.1	1
	H42K12.1	1
	K01C8.10	1
	K02B2.1	1
	K02F3.12	1
	K03E5.3	1
	K03H1.2	1
	K04D7.2	1
	K04G7.4	1
	K07A1.3	1
	K07A3.3	1
	K07A9.2	1
	K07C11.2	1
	K07C5.1	1
	K07E3.4	1
	K07E3.7	1
	K08A8.1	1
	K08B12.5	1
	K08E7.9	1
	K08F11.4	1
	K08F4.1	1
	K08F8.1	1
	K09A9.1	1
	K09B11.1	1
	K09H11.1	1
	K11D12.10	1
	K11D9.1	1
	K11D9.2	1
	K11E8.1	1
	K12C11.4	1
	K12D12.1	1
	K12F2.1	1
	K12F2.2	1
	K12H4.8	1
	M01B12.5	1
	M01B2.1	1
	M01D7.4	1
	M01E11.6	1
	M02B7.3	1
	M03A1.1	1
	M03C11.1	1
	M03C11.2	1
	M03C11.5	1
	M03C11.8	1
	M03D4.1	1
	M03F4.2	1
	M04C9.5	1
	M106.1	1
	M106.4	1
	M176.2	1
	M176.6	1
	M176.7	1
	M7.5	1
	M79.1	1
	PAR2.3	1
	R02C2.1	1
	R02C2.2	1
	R02C2.6	1
	R03G5.2	1
	R05C11.3	1
	R05D11.4	1
	R05D3.1	1
	R05D3.7	1
	R05G6.5	1
	R06A10.4	1
	R06C7.10	1
	R06C7.8	1
	R09D1.12	1
	R09D1.13	1
	R107.4	1
	R10E4.4	1
	R11A8.6	1
	R11E3.1	1
	R11G1.4	1
	R13F6.6	1
	R13G10.1	1
	R144.1	1
	R151.4	1
	R151.7	1
	R166.5	1
	R53.2	1
	R74.1	1
	R90.1	1
	T01A4.1	1
	T01C8.1	1
	T01G1.1	1
	T01G5.1	1
	T01G9.5	1
	T01H8.1	1
	T02C12.1	1
	T02D1.5	1
	T02G5.6	1
	T02G5.9	1
	T04A11.6	1
	T04B2.2	1
	T04C10.1	1
	T04C12.4	1
	T04C12.5	1
	T04C12.6	1
	T04D1.4	1
	T04H1.4	1
	T05A12.4	1
	T05C12.7	1
	T05E11.3	1
	T05E11.4	1
	T05E8.3	1
	T05G5.3	1
	T05G5.5	1
	T06A10.1	1
	T06C10.3	1
	T07A9.2	1
	T07D4.3	1
	T07D4.4	1
	T08B2.9	1
	T08D2.7	1
	T09A5.2	1
	T10B5.5	1
	T10F2.1	1
	T10H10.1	1
	T10H9.2	1
	T10H9.5	1
	T11G6.1	1
	T12F5.3	1
	T13A10.11	1
	T14E8.1	1
	T14G10.1	1
	T14G8.1	1
	T14G8.3	1
	T17A3.1	1
	T17E9.1	1
	T18D3.4	1
	T18D3.7	1
	T19A5.2	1
	T20F10.1	1
	T20H4.3	1
	T21B10.7	1
	T21E12.4	1
	T21E8.1	1
	T21E8.2	1
	T21E8.3	1
	T21G5.1	1
	T21G5.3	1
	T22D1.10	1
	T23G5.1	1
	T23H2.3	1
	T23H2.5	1
	T24H7.2	1
	T24H7.5	1
	T25B9.4	1
	T25C8.2	1
	T25E12.4	1
	T26A5.1	1
	T26G10.1	1
	T27A3.6	1
	T27C10.6	1
	T27E9.3	1
	T27E9.7	1
	T27F6.5	1
	T28A8.7	1
	T28F3.5	1
	VF11C1L.1	1
	VZC374L.1	1
	W01B6.5	1
	W02A11.4	1
	W02B12.12	1
	W02B12.6	1
	W02B12.7	1
	W02B3.2	1
	W02H5.8	1
	W03A3.2	1
	W03B1.4	1
	W03C9.3	1
	W03F8.2	1
	W03G1.6	1
	W04B5.5	1
	W04C9.1	1
	W04G5.10	1
	W04G5.6	1
	W06B3.2	1
	W06D4.6	1
	W06F12.1	1
	W06H8.8	1
	W07G4.3	1
	W08D2.5	1
	W08D2.7	1
	W09B6.1	1
	W09C2.3	1
	W09C5.5	1
	W09D10.2	1
	W09D6.6	1
	W10G6.2	1
	Y105C5A.24	1
	Y105E8A.12	1
	Y105E8A.19	1
	Y105E8A.20	1
	Y105E8B.3	1
	Y106G6E.4	1
	Y106G6E.6	1
	Y108F1.1	1
	Y110A7A.6	1
	Y111B2A.22	1
	Y113G7B.14	1
	Y116A8C.13	1
	Y11D7A.14	1
	Y17G7B.13	1
	Y17G7B.5	1
	Y18D10A.19	1
	Y18D10A.5	1
	Y18H1A.10	1
	Y18H1A.6	1
	Y22D7AL.10	1
	Y22D7AL.5	1
	Y23H5A.7	1
	Y23H5B.6	1
	Y34D9A.10	1
	Y37A1B.12	1
	Y37A1B.13	1
	Y37E11AM.1	1
	Y38A10A.6	1
	Y38C1BA.2	1
	Y38E10A.8	1
	Y38F1A.10	1
	Y38F2AR.7	1
	Y38H8A.4	1
	Y39A1A.12	1
	Y39B6A.36	1
	Y39D8C.1	1
	Y39E4B.1	1
	Y39G10AL.3	1
	Y39G10AR.14	1
	Y39G10AR.3	1
	Y39G8B.5	1
	Y39H10A.7	1
	Y40A1A.1	1
	Y41E3.4	1
	Y42A5A.4	1
	Y42G9A.4	1
	Y42G9A.6	1
	Y43C5A.5	1
	Y43C5A.6	1
	Y43D4A.6	1
	Y43F4B.6	1
	Y43F8C.12	1
	Y43F8C.6	1
	Y45F10A.4	1
	Y46G5A.4	1
	Y47C4A.1	1
	Y47D3A.11	1
	Y47D3A.16	1
	Y47D3A.25	1
	Y47D3A.26	1
	Y47G6A.10	1
	Y47G6A.11	1
	Y47G6A.13	1
	Y48B6A.13	1
	Y48C3A.7	1
	Y48G1C.2	1
	Y48G8AL.11	1
	Y48G8AL.15	1
	Y48G8AL.6	1
	Y49E10.1	1
	Y49E10.11	1
	Y4C6A.1	1
	Y50D4B.6	1
	Y50D7A.11	1
	Y50D7A.2	1
	Y50D7A.3	1
	Y50D7A.6	1
	Y50E8A.16	1
	Y52B11A.4	1
	Y52D3.1	1
	Y53C10A.9	1
	Y53C12A.1	1
	Y54E10A.9	1
	Y54E10BL.6	1
	Y54E2A.4	1
	Y54G11A.3	1
	Y55B1AL.3	1
	Y55D5A.5	1
	Y55F3AR.3	1
	Y55F3BR.1	1
	Y57G11C.1	1
	Y59A8B.14	1
	Y59A8B.23	1
	Y59H11AR.2	1
	Y60A3A.1	1
	Y60A3A.12	1
	Y60A3A.13	1
	Y65B4A.6	1
	Y65B4A.8	1
	Y66D12A.15	1
	Y66D12A.23	1
	Y66H1A.6	1
	Y67D2.6	1
	Y67D8C.10	1
	Y71F9B.7	1
	Y71G12B.8	1
	Y71H2AM.19	1
	Y73B3A.21	1
	Y73B6A.5	1
	Y74C10AR.3	1
	Y75B8A.26	1
	Y75B8A.4	1
	Y76A2A.2	1
	Y79H2A.11	1
	Y80D3A.1	1
	Y81G3A.3	1
	Y87G2A.5	1
	Y92C3B.3	1
	Y92H12A.1	1
	Y94H6A.5	1
	ZC123.4	1
	ZC155.3	1
	ZC317.1	1
	ZC373.4	1
	ZC395.6	1
	ZC404.9	1
	ZC434.5	1
	ZC434.9	1
	ZC449.3	1
	ZC504.3	1
	ZC504.4	1
	ZC581.1	1
	ZC581.9	1
	ZK1067.1	1
	ZK1127.11	1
	ZK1127.7	1
	ZK256.1	1
	ZK370.5	1
	ZK384.3	1
	ZK455.7	1
	ZK484.2	1
	ZK512.2	1
	ZK524.3	1
	ZK524.4	1
	ZK616.4	1
	ZK617.1	1
	ZK622.1	1
	ZK632.1	1
	ZK632.3	1
	ZK637.5	1
	ZK637.9	1
	ZK673.2	1
	ZK675.3	1
	ZK686.2	1
	ZK792.1	1
	ZK909.2	1
	ZK930.1	1
	ZK938.5	1
ATP binding Total		685
ATP citrate synthase activity	B0365.1	1
	C05G5.4	1
	D1005.1	1
	F23H11.3	1
ATP citrate synthase activity Total		4
ATP-dependent 3'-5' DNA helicase activity	F18C5.2	1
	T04A11.6	1
ATP-dependent 3'-5' DNA helicase activity Total		2
ATP-dependent DNA helicase activity	F25H2.13	1
	F33H2.1	1
	F43G6.1	1
	M03C11.2	1
	R07E5.8	1
	Y47D3A.4	1
	Y50D7A.11	1
	Y50D7A.2	1
	Y66D12A.15	1
ATP-dependent DNA helicase activity Total		9
ATP-dependent helicase activity	B0414.6	1
	B0511.6	1
	C04H5.6	1
	C06E1.10	1
	C07H6.5	1
	C14C11.6	1
	C24H12.4	1
	C26D10.2	1
	C28H8.3	1
	C41D11.7	1
	C46F11.4	1
	C55B7.1	1
	D2005.5	1
	E03A3.2	1
	EEED8.5	1
	F01F1.7	1
	F01G4.3	1
	F15B10.2	1
	F18C5.2	1
	F25H2.13	1
	F26F12.7	1
	F33D11.10	1
	F33H2.1	1
	F37A4.8	1
	F52B5.3	1
	F53H1.1	1
	F55F8.2	1
	F56D2.6	1
	F57B9.3	1
	F57B9.6	1
	F58E10.3	1
	F58G11.2	1
	H06O01.2	1
	H20J04.4	1
	H27M09.1	1
	K02F3.12	1
	K03H1.2	1
	K12H4.8	1
	M03C11.2	1
	R05D11.4	1
	T04A11.6	1
	T05E8.3	1
	T06A10.1	1
	T07D4.3	1
	T07D4.4	1
	T12F5.3	1
	T14G8.1	1
	T21G5.3	1
	T26G10.1	1
	W03A3.2	1
	W08D2.7	1
	Y113G7B.14	1
	Y116A8C.13	1
	Y23H5B.6	1
	Y37E11AM.1	1
	Y38A10A.6	1
	Y39B6A.36	1
	Y46G5A.4	1
	Y50D7A.2	1
	Y54E10A.9	1
	Y54E2A.4	1
	Y54G11A.3	1
	Y55B1AL.3	1
	Y55F3BR.1	1
	Y65B4A.6	1
	Y67D2.6	1
	Y71G12B.8	1
	Y71H2AM.19	1
	Y94H6A.5	1
	ZC317.1	1
	ZK512.2	1
	ZK675.3	1
	ZK686.2	1
ATP-dependent helicase activity Total		73
ATP-dependent peptidase activity	C34B2.6	1
	M18.6	1
	Y75B8A.4	1
ATP-dependent peptidase activity Total		3
ATP-dependent RNA helicase activity	Y48G8AL.6	1
ATP-dependent RNA helicase activity Total		1
ATPase activator activity	C01G10.8	1
ATPase activator activity Total		1
ATPase activity	C05A9.1	1
	C05D10.3	1
	C06A1.1	1
	C10C6.5	1
	C10C6.6	1
	C15H9.6	1
	C16C10.12	1
	C18C4.2	1
	C30H6.6	1
	C34B2.6	1
	C34G6.4	1
	C41C4.8	1
	C44B7.8	1
	C44B7.9	1
	C47A10.1	1
	C48B4.4	1
	C52E12.2	1
	C54D1.1	1
	C54G10.3	1
	D2030.2	1
	DH11.3	1
	E03G2.2	1
	F02E11.1	1
	F11C1.5	1
	F12B6.1	1
	F14F4.3	1
	F18C12.1	1
	F18E2.2	1
	F19B6.4	1
	F20B6.3	1
	F21G4.2	1
	F22E10.1	1
	F22E10.2	1
	F22E10.3	1
	F23F1.8	1
	F23F12.6	1
	F31E3.3	1
	F32D1.10	1
	F42A10.1	1
	F42E11.1	1
	F43E2.4	1
	F55F10.1	1
	F56F11.4	1
	F56H1.4	1
	F57A10.3	1
	F57C12.4	1
	F57C12.5	1
	K04D7.2	1
	K07A3.3	1
	K07E3.7	1
	K08E7.9	1
	M02B7.3	1
	M03C11.5	1
	M106.1	1
	M7.5	1
	T02D1.5	1
	T04C12.5	1
	T10H9.5	1
	T21E12.4	1
	T21E8.1	1
	T21E8.2	1
	T21E8.3	1
	T26A5.1	1
	T27E9.7	1
	W04C9.1	1
	W08D2.5	1
	W09D6.6	1
	Y17G7B.5	1
	Y18D10A.19	1
	Y18H1A.6	1
	Y39D8C.1	1
	Y39E4B.1	1
	Y39G10AR.14	1
	Y42G9A.6	1
	Y43F8C.12	1
	Y47D3A.11	1
	Y47D3A.26	1
	Y48G8AL.11	1
	Y49E10.1	1
	Y50E8A.16	1
	Y53C10A.9	1
	Y57G11C.1	1
	Y59H11AR.2	1
	Y74C10AR.3	1
	Y75B8A.26	1
	Y75B8A.4	1
	ZK455.7	1
	ZK484.2	1
	ZK792.1	1
ATPase activity Total		89
ATPase activity, coupled to transmembrane movement of ions, phosphorylative mechanism	B0365.3	1
	C01G12.8	1
	C02E7.1	1
	C09H5.2	1
	C10C6.6	1
	F02C9.3	1
	F36H2.1	1
	H06H21.10	1
	K07E3.7	1
	K11D9.2	1
	R05C11.3	1
	T24H7.5	1
	W08D2.5	1
	W09C2.3	1
	W09D10.2	1
	Y105E8A.12	1
	Y49E10.11	1
	Y59H11AR.2	1
	Y67D8C.10	1
	Y76A2A.2	1
	ZK256.1	1
ATPase activity, coupled to transmembrane movement of ions, phosphorylative mechanism Total		21
ATPase activity, coupled to transmembrane movement of substances	C05A9.1	1
	C18C4.2	1
	C30H6.6	1
	C34G6.4	1
	C47A10.1	1
	C48B4.4	1
	C54D1.1	1
	DH11.3	1
	E03G2.2	1
	F14F4.3	1
	F20B6.3	1
	F21G4.2	1
	F22E10.1	1
	F22E10.2	1
	F22E10.3	1
	F42E11.1	1
	F43E2.4	1
	F55H2.2	1
	F57A10.3	1
	F57C12.4	1
	F57C12.5	1
	K08E7.9	1
	T21E8.1	1
	T21E8.2	1
	T21E8.3	1
	W04C9.1	1
	W09D6.6	1
	Y43F8C.12	1
	Y48G8AL.11	1
	Y50E8A.16	1
	Y57G11C.1	1
	Y74C10AR.3	1
	Y75B8A.26	1
	ZK455.7	1
	ZK484.2	1
ATPase activity, coupled to transmembrane movement of substances Total		35
ATPase binding	B0207.4	1
ATPase binding Total		1
axon guidance receptor activity	B0273.4	1
axon guidance receptor activity Total		1
beta-amyloid binding	Y54F10AM.2	1
beta-amyloid binding Total		1
beta-catenin binding	K04G2.8	1
	R13H4.4	1
	T04B2.2	1
	W10C8.2	1
	ZK1248.19	1
beta-catenin binding Total		5
beta-galactosidase activity	T19B10.3	1
beta-galactosidase activity Total		1
beta-lactamase activity	C18C4.2	1
beta-lactamase activity Total		1
beta-N-acetylhexosaminidase activity	T14F9.3	1
beta-N-acetylhexosaminidase activity Total		1
bHLH transcription factor binding	B0304.1	1
bHLH transcription factor binding Total		1
bile acid:sodium symporter activity	Y71G10AR.1	1
	Y71G10AR.4	1
bile acid:sodium symporter activity Total		2
binding	B0024.8	1
	B0035.5	1
	B0218.6	1
	B0218.8	1
	B0250.5	1
	B0261.2	1
	B0272.3	1
	B0273.2	1
	B0286.2	1
	B0365.1	1
	B0365.6	1
	B0432.4	1
	B0454.7	1
	B0464.2	1
	C01B12.2	1
	C01F1.3	1
	C01G12.5	1
	C01G8.3	1
	C01G8.5	1
	C01H6.4	1
	C03E10.5	1
	C03H5.1	1
	C05D11.12	1
	C05D9.3	1
	C05G5.4	1
	C06A1.1	1
	C06B3.4	1
	C06B3.5	1
	C06B8.3	1
	C06E4.3	1
	C06E4.6	1
	C06G3.7	1
	C08B11.1	1
	C08B6.9	1
	C10F3.2	1
	C14A4.1	1
	C14A6.1	1
	C14C10.1	1
	C14C10.5	1
	C15B12.1	1
	C15B12.8	1
	C15H11.4	1
	C15H9.1	1
	C16A3.3	1
	C16C10.1	1
	C17G10.2	1
	C17G10.8	1
	C18C4.10	1
	C18D11.2	1
	C18E3.6	1
	C18H9.7	1
	C23G10.4	1
	C24A11.8	1
	C24G6.6	1
	C25A1.8	1
	C25B8.4	1
	C25F6.3	1
	C25G4.4	1
	C26D10.3	1
	C26E6.8	1
	C27H5.7	1
	C27H6.4	1
	C29F3.1	1
	C30G12.7	1
	C30H6.1	1
	C31C9.2	1
	C33E10.10	1
	C33F10.12	1
	C33F10.14	1
	C33F10.5	1
	C33H5.8	1
	C34B2.5	1
	C34B4.1	1
	C34C6.6	1
	C34D4.14	1
	C34G6.1	1
	C35D10.14	1
	C35D10.15	1
	C36B1.1	1
	C41A3.1	1
	C41C4.8	1
	C41H7.7	1
	C42C1.10	1
	C42D8.8	1
	C44E4.6	1
	C44F1.2	1
	C45B11.3	1
	C46F11.2	1
	C46H11.11	1
	C46H11.2	1
	C47A10.5	1
	C47B2.6	1
	C47E12.2	1
	C47E12.5	1
	C47E8.7	1
	C48D5.2	1
	C50F2.3	1
	C51F7.1	1
	C53B4.7	1
	C53D5.6	1
	C54C8.7	1
	C54D1.2	1
	C54D1.6	1
	C54F6.14	1
	C54G10.4	1
	C54G4.4	1
	C55B6.2	1
	C56C10.10	1
	C56G2.6	1
	D1005.1	1
	D1014.3	1
	D1037.3	1
	D1044.8	1
	D1046.3	1
	D1054.8	1
	D2021.1	1
	D2045.2	1
	D2096.4	1
	DC2.5	1
	E03H4.10	1
	E04F6.15	1
	E04F6.7	1
	F01G10.2	1
	F01G10.3	1
	F01G4.2	1
	F01G4.6	1
	F02C12.2	1
	F07C6.4	1
	F08D12.1	1
	F08F3.4	1
	F08F8.3	1
	F08H9.5	1
	F08H9.6	1
	F08H9.7	1
	F08H9.8	1
	F08H9.9	1
	F09E10.3	1
	F10B5.6	1
	F10C5.1	1
	F10F2.1	1
	F10G2.3	1
	F11A5.12	1
	F11H8.1	1
	F12E12.11	1
	F13B10.1	1
	F13B9.8	1
	F13D12.2	1
	F13G3.7	1
	F16A11.3	1
	F16H6.1	1
	F17E5.2	1
	F18A11.1	1
	F18C12.2	1
	F18E3.7	1
	F20D1.9	1
	F20H11.3	1
	F20H11.5	1
	F21H12.5	1
	F22B5.7	1
	F22F7.1	1
	F22F7.2	1
	F23H11.3	1
	F25B4.7	1
	F25C8.2	1
	F25D1.5	1
	F25G6.5	1
	F26B1.3	1
	F26D10.12	1
	F26D2.15	1
	F27D9.6	1
	F28B3.8	1
	F28H7.2	1
	F29F11.1	1
	F29G9.6	1
	F30H5.1	1
	F31D4.3	1
	F32A5.8	1
	F32A6.4	1
	F32D1.3	1
	F32E10.4	1
	F32H2.5	1
	F33H1.2	1
	F33H2.6	1
	F35B12.2	1
	F35G2.4	1
	F36H12.11	1
	F36H5.6	1
	F36H9.3	1
	F37C4.6	1
	F38B6.6	1
	F39B2.3	1
	F39H11.2	1
	F40G9.10	1
	F41G4.2	1
	F42A10.2	1
	F42A10.4	1
	F42G8.6	1
	F43E2.3	1
	F43G9.3	1
	F45D3.5	1
	F45G2.4	1
	F46C5.6	1
	F46E10.10	1
	F47B10.7	1
	F47G4.3	1
	F48E8.5	1
	F49A5.2	1
	F49A5.3	1
	F49A5.4	1
	F49A5.5	1
	F49A5.7	1
	F49A5.9	1
	F49E10.5	1
	F49E8.5	1
	F52E1.10	1
	F52E1.2	1
	F52H3.2	1
	F52H3.5	1
	F53B1.4	1
	F53B2.5	1
	F53C11.3	1
	F53F4.5	1
	F53G2.6	1
	F53H4.5	1
	F54C1.5	1
	F54C8.1	1
	F54C9.8	1
	F54F3.4	1
	F55A12.4	1
	F55C5.6	1
	F55E10.6	1
	F55G1.13	1
	F55G1.5	1
	F55H12.3	1
	F56C9.5	1
	F56D1.5	1
	F56H1.6	1
	F56H6.5	1
	F56H6.8	1
	F58A4.14	1
	F58A4.5	1
	F59A7.9	1
	F59E11.2	1
	H05G16.1	1
	H12I13.4	1
	H15N14.2	1
	H16D19.1	1
	H24K24.3	1
	K01C8.7	1
	K01H12.2	1
	K02F2.2	1
	K02F3.2	1
	K02F3.5	1
	K04F10.1	1
	K04G2.6	1
	K04G2.8	1
	K04G7.3	1
	K05C4.6	1
	K07B1.3	1
	K07E3.3	1
	K08C7.2	1
	K08C7.5	1
	K08D12.2	1
	K09A9.6	1
	K09B11.9	1
	K10B2.3	1
	K10B3.7	1
	K10B3.8	1
	K10H10.3	1
	K10H10.6	1
	K11G12.5	1
	K11H3.1	1
	K11H3.3	1
	LLC1.3	1
	M01E11.2	1
	M03A8.1	1
	M03F8.3	1
	M106.3	1
	M153.1	1
	M4.2	1
	M57.2	1
	M7.2	1
	M7.5	1
	R01H2.5	1
	R02D3.1	1
	R02D3.5	1
	R02E12.2	1
	R04B5.5	1
	R04B5.6	1
	R05D8.10	1
	R05D8.7	1
	R05D8.8	1
	R05D8.9	1
	R05F9.10	1
	R06A4.4	1
	R06F6.9	1
	R07B7.10	1
	R07C3.1	1
	R07C3.12	1
	R07E3.4	1
	R08E5.2	1
	R08H2.1	1
	R09E12.3	1
	R11.1	1
	R119.3	1
	R11A5.1	1
	R11D1.11	1
	R13F6.10	1
	R13G10.2	1
	R13H9.1	1
	T01B11.4	1
	T01G6.1	1
	T01G6.10	1
	T02E1.5	1
	T03F1.1	1
	T03F1.10	1
	T03F6.1	1
	T04B2.6	1
	T04C9.6	1
	T05A7.2	1
	T05C12.3	1
	T05F1.10	1
	T05F1.8	1
	T05G5.7	1
	T07D10.4	1
	T07H3.4	1
	T07H3.5	1
	T08A11.2	1
	T08B2.7	1
	T08D10.2	1
	T09B4.10	1
	T09F3.2	1
	T09F3.3	1
	T10F2.2	1
	T10H10.1	1
	T11F9.11	1
	T12D8.3	1
	T12D8.8	1
	T13F2.2	1
	T14F9.1	1
	T14G10.5	1
	T15B7.1	1
	T19A5.1	1
	T20B12.1	1
	T20B12.2	1
	T20B3.12	1
	T20B3.13	1
	T20B3.15	1
	T20B3.16	1
	T20B5.1	1
	T20D3.5	1
	T20G5.1	1
	T22G5.2	1
	T22G5.6	1
	T24C4.6	1
	T25B9.9	1
	T25E12.10	1
	T25E12.7	1
	T25E12.8	1
	T25E12.9	1
	T25F10.5	1
	T25G12.2	1
	T25G12.7	1
	T27E9.1	1
	T27F6.2	1
	VF13D12L.1	1
	W01C9.4	1
	W02A11.4	1
	W02B12.9	1
	W02D3.5	1
	W02D3.6	1
	W02D3.7	1
	W03F9.9	1
	W04A4.5	1
	W04E12.6	1
	W04E12.8	1
	W06B11.2	1
	W07G4.3	1
	W09G10.4	1
	W09H1.5	1
	W10C6.1	1
	Y102A5A.1	1
	Y102A5B.1	1
	Y102A5B.2	1
	Y102A5B.3	1
	Y105C5B.21	1
	Y105E8A.9	1
	Y106G6H.5	1
	Y110A7A.17	1
	Y17G7B.1	1
	Y25C1A.5	1
	Y32H12A.3	1
	Y37B11A.3	1
	Y37E3.1	1
[truncated: 10,660 more rows]

## Sheet: C) genes with mf annot (5269)
Gene ID	GO ID	GO Ontology	GO Term
Y56A3A.19	GO:0000036	molecular_function	acyl carrier activity
C49H3.10	GO:0000049	molecular_function	tRNA binding
F29C4.6	GO:0000049	molecular_function	tRNA binding
F58B3.5	GO:0000049	molecular_function	tRNA binding
T02G5.9	GO:0000049	molecular_function	tRNA binding
T08B2.9	GO:0000049	molecular_function	tRNA binding
Y60A3A.13	GO:0000049	molecular_function	tRNA binding
C18D11.2	GO:0000062	molecular_function	acyl-CoA binding
C44E4.6	GO:0000062	molecular_function	acyl-CoA binding
F47B10.7	GO:0000062	molecular_function	acyl-CoA binding
F56C9.5	GO:0000062	molecular_function	acyl-CoA binding
R06F6.9	GO:0000062	molecular_function	acyl-CoA binding
T12D8.3	GO:0000062	molecular_function	acyl-CoA binding
Y17G7B.1	GO:0000062	molecular_function	acyl-CoA binding
Y41E3.7	GO:0000062	molecular_function	acyl-CoA binding
T07C4.7	GO:0000104	molecular_function	succinate dehydrogenase activity
B0035.12	GO:0000166	molecular_function	nucleotide binding
B0207.6	GO:0000166	molecular_function	nucleotide binding
B0336.3	GO:0000166	molecular_function	nucleotide binding
B0414.5	GO:0000166	molecular_function	nucleotide binding
B0464.1	GO:0000166	molecular_function	nucleotide binding
C01F6.5	GO:0000166	molecular_function	nucleotide binding
C05A9.1	GO:0000166	molecular_function	nucleotide binding
C05D10.3	GO:0000166	molecular_function	nucleotide binding
C06A1.1	GO:0000166	molecular_function	nucleotide binding
C07A4.1	GO:0000166	molecular_function	nucleotide binding
C07H6.4	GO:0000166	molecular_function	nucleotide binding
C08B11.5	GO:0000166	molecular_function	nucleotide binding
C10C6.5	GO:0000166	molecular_function	nucleotide binding
C11H1.4	GO:0000166	molecular_function	nucleotide binding
C14B1.10	GO:0000166	molecular_function	nucleotide binding
C16C10.12	GO:0000166	molecular_function	nucleotide binding
C17D12.2	GO:0000166	molecular_function	nucleotide binding
C17E4.5	GO:0000166	molecular_function	nucleotide binding
C18A3.5	GO:0000166	molecular_function	nucleotide binding
C18C4.3	GO:0000166	molecular_function	nucleotide binding
C18D11.4	GO:0000166	molecular_function	nucleotide binding
C24B5.2	GO:0000166	molecular_function	nucleotide binding
C25A1.4	GO:0000166	molecular_function	nucleotide binding
C25A1.7	GO:0000166	molecular_function	nucleotide binding
C25D7.6	GO:0000166	molecular_function	nucleotide binding
C26E6.9	GO:0000166	molecular_function	nucleotide binding
C27H5.3	GO:0000166	molecular_function	nucleotide binding
C27H6.2	GO:0000166	molecular_function	nucleotide binding
C29H12.1	GO:0000166	molecular_function	nucleotide binding
C30B5.3	GO:0000166	molecular_function	nucleotide binding
C30B5.4	GO:0000166	molecular_function	nucleotide binding
C30H6.6	GO:0000166	molecular_function	nucleotide binding
C33H5.12	GO:0000166	molecular_function	nucleotide binding
C34B2.6	GO:0000166	molecular_function	nucleotide binding
C34E10.2	GO:0000166	molecular_function	nucleotide binding
C34E10.4	GO:0000166	molecular_function	nucleotide binding
C34E10.6	GO:0000166	molecular_function	nucleotide binding
C34G6.4	GO:0000166	molecular_function	nucleotide binding
C40H1.1	GO:0000166	molecular_function	nucleotide binding
C41C4.8	GO:0000166	molecular_function	nucleotide binding
C41D11.7	GO:0000166	molecular_function	nucleotide binding
C43E11.1	GO:0000166	molecular_function	nucleotide binding
C43E11.10	GO:0000166	molecular_function	nucleotide binding
C44B7.2	GO:0000166	molecular_function	nucleotide binding
C44B7.8	GO:0000166	molecular_function	nucleotide binding
C44B7.9	GO:0000166	molecular_function	nucleotide binding
C44E4.4	GO:0000166	molecular_function	nucleotide binding
C47A10.1	GO:0000166	molecular_function	nucleotide binding
C47D12.6	GO:0000166	molecular_function	nucleotide binding
C47E12.1	GO:0000166	molecular_function	nucleotide binding
C48B4.4	GO:0000166	molecular_function	nucleotide binding
C49H3.5	GO:0000166	molecular_function	nucleotide binding
C50B8.1	GO:0000166	molecular_function	nucleotide binding
C50D2.5	GO:0000166	molecular_function	nucleotide binding
C52E4.4	GO:0000166	molecular_function	nucleotide binding
C54D1.1	GO:0000166	molecular_function	nucleotide binding
C54G10.2	GO:0000166	molecular_function	nucleotide binding
C54G10.3	GO:0000166	molecular_function	nucleotide binding
D1007.7	GO:0000166	molecular_function	nucleotide binding
D1046.1	GO:0000166	molecular_function	nucleotide binding
D2030.2	GO:0000166	molecular_function	nucleotide binding
D2089.1	GO:0000166	molecular_function	nucleotide binding
D2089.4	GO:0000166	molecular_function	nucleotide binding
DH11.3	GO:0000166	molecular_function	nucleotide binding
E03G2.2	GO:0000166	molecular_function	nucleotide binding
EEED8.12	GO:0000166	molecular_function	nucleotide binding
EEED8.4	GO:0000166	molecular_function	nucleotide binding
EEED8.7	GO:0000166	molecular_function	nucleotide binding
F07A11.6	GO:0000166	molecular_function	nucleotide binding
F10B5.5	GO:0000166	molecular_function	nucleotide binding
F10C2.4	GO:0000166	molecular_function	nucleotide binding
F10C2.6	GO:0000166	molecular_function	nucleotide binding
F10G8.6	GO:0000166	molecular_function	nucleotide binding
F11A10.1	GO:0000166	molecular_function	nucleotide binding
F11A10.7	GO:0000166	molecular_function	nucleotide binding
F11C7.4	GO:0000166	molecular_function	nucleotide binding
F12B6.1	GO:0000166	molecular_function	nucleotide binding
F14F4.3	GO:0000166	molecular_function	nucleotide binding
F18E2.2	GO:0000166	molecular_function	nucleotide binding
F18H3.3	GO:0000166	molecular_function	nucleotide binding
F19B6.4	GO:0000166	molecular_function	nucleotide binding
F20B6.3	GO:0000166	molecular_function	nucleotide binding
F21D5.7	GO:0000166	molecular_function	nucleotide binding
F21G4.2	GO:0000166	molecular_function	nucleotide binding
F22B5.2	GO:0000166	molecular_function	nucleotide binding
F22B5.9	GO:0000166	molecular_function	nucleotide binding
F22D6.3	GO:0000166	molecular_function	nucleotide binding
F22E10.1	GO:0000166	molecular_function	nucleotide binding
F22E10.2	GO:0000166	molecular_function	nucleotide binding
F22E10.3	GO:0000166	molecular_function	nucleotide binding
F23F1.8	GO:0000166	molecular_function	nucleotide binding
F23F12.6	GO:0000166	molecular_function	nucleotide binding
F25B5.7	GO:0000166	molecular_function	nucleotide binding
F26A3.2	GO:0000166	molecular_function	nucleotide binding
F26F4.10	GO:0000166	molecular_function	nucleotide binding
F28H1.3	GO:0000166	molecular_function	nucleotide binding
F29C4.7	GO:0000166	molecular_function	nucleotide binding
F29G9.5	GO:0000166	molecular_function	nucleotide binding
F31E3.3	GO:0000166	molecular_function	nucleotide binding
F32B4.4	GO:0000166	molecular_function	nucleotide binding
F32D1.1	GO:0000166	molecular_function	nucleotide binding
F32D1.10	GO:0000166	molecular_function	nucleotide binding
F33H2.5	GO:0000166	molecular_function	nucleotide binding
F35H8.5	GO:0000166	molecular_function	nucleotide binding
F36H1.2	GO:0000166	molecular_function	nucleotide binding
F38A1.8	GO:0000166	molecular_function	nucleotide binding
F39G3.7	GO:0000166	molecular_function	nucleotide binding
F39H2.2	GO:0000166	molecular_function	nucleotide binding
F42A10.1	GO:0000166	molecular_function	nucleotide binding
F42A6.7	GO:0000166	molecular_function	nucleotide binding
F42E11.1	GO:0000166	molecular_function	nucleotide binding
F43E2.4	GO:0000166	molecular_function	nucleotide binding
F44B9.8	GO:0000166	molecular_function	nucleotide binding
F44G4.4	GO:0000166	molecular_function	nucleotide binding
F45E10.1	GO:0000166	molecular_function	nucleotide binding
F46A9.6	GO:0000166	molecular_function	nucleotide binding
F46B6.3	GO:0000166	molecular_function	nucleotide binding
F52B5.6	GO:0000166	molecular_function	nucleotide binding
F54B3.3	GO:0000166	molecular_function	nucleotide binding
F54C9.6	GO:0000166	molecular_function	nucleotide binding
F55D10.2	GO:0000166	molecular_function	nucleotide binding
F55F10.1	GO:0000166	molecular_function	nucleotide binding
F56A8.6	GO:0000166	molecular_function	nucleotide binding
F56D1.7	GO:0000166	molecular_function	nucleotide binding
F56F11.4	GO:0000166	molecular_function	nucleotide binding
F56F4.6	GO:0000166	molecular_function	nucleotide binding
F56H1.4	GO:0000166	molecular_function	nucleotide binding
F57A10.3	GO:0000166	molecular_function	nucleotide binding
F57C12.4	GO:0000166	molecular_function	nucleotide binding
F57C12.5	GO:0000166	molecular_function	nucleotide binding
F58B3.5	GO:0000166	molecular_function	nucleotide binding
F58B3.7	GO:0000166	molecular_function	nucleotide binding
F58D5.1	GO:0000166	molecular_function	nucleotide binding
F58F6.4	GO:0000166	molecular_function	nucleotide binding
H15N14.2	GO:0000166	molecular_function	nucleotide binding
H24K24.4	GO:0000166	molecular_function	nucleotide binding
H28G03.1	GO:0000166	molecular_function	nucleotide binding
JC8.10	GO:0000166	molecular_function	nucleotide binding
K02F3.11	GO:0000166	molecular_function	nucleotide binding
K04D7.2	GO:0000166	molecular_function	nucleotide binding
K04G7.10	GO:0000166	molecular_function	nucleotide binding
K07A3.3	GO:0000166	molecular_function	nucleotide binding
K07H8.10	GO:0000166	molecular_function	nucleotide binding
K08D10.3	GO:0000166	molecular_function	nucleotide binding
K08D10.4	GO:0000166	molecular_function	nucleotide binding
K08E7.9	GO:0000166	molecular_function	nucleotide binding
K08F11.4	GO:0000166	molecular_function	nucleotide binding
K08F4.1	GO:0000166	molecular_function	nucleotide binding
K08F4.2	GO:0000166	molecular_function	nucleotide binding
M03C11.5	GO:0000166	molecular_function	nucleotide binding
M18.7	GO:0000166	molecular_function	nucleotide binding
R05H10.2	GO:0000166	molecular_function	nucleotide binding
R06C1.4	GO:0000166	molecular_function	nucleotide binding
R07E5.14	GO:0000166	molecular_function	nucleotide binding
R09B3.2	GO:0000166	molecular_function	nucleotide binding
R09B3.3	GO:0000166	molecular_function	nucleotide binding
R10E4.2	GO:0000166	molecular_function	nucleotide binding
R10E9.1	GO:0000166	molecular_function	nucleotide binding
R11A8.6	GO:0000166	molecular_function	nucleotide binding
R74.1	GO:0000166	molecular_function	nucleotide binding
R74.5	GO:0000166	molecular_function	nucleotide binding
T01D1.2	GO:0000166	molecular_function	nucleotide binding
T01G9.5	GO:0000166	molecular_function	nucleotide binding
T02D1.5	GO:0000166	molecular_function	nucleotide binding
T02G5.9	GO:0000166	molecular_function	nucleotide binding
T04A8.6	GO:0000166	molecular_function	nucleotide binding
T07A9.11	GO:0000166	molecular_function	nucleotide binding
T07A9.2	GO:0000166	molecular_function	nucleotide binding
T07D1.4	GO:0000166	molecular_function	nucleotide binding
T07F10.3	GO:0000166	molecular_function	nucleotide binding
T08B2.5	GO:0000166	molecular_function	nucleotide binding
T08B2.9	GO:0000166	molecular_function	nucleotide binding
T10F2.1	GO:0000166	molecular_function	nucleotide binding
T11G6.1	GO:0000166	molecular_function	nucleotide binding
T11G6.8	GO:0000166	molecular_function	nucleotide binding
T12D8.2	GO:0000166	molecular_function	nucleotide binding
T18D3.7	GO:0000166	molecular_function	nucleotide binding
T20H4.3	GO:0000166	molecular_function	nucleotide binding
T21E12.4	GO:0000166	molecular_function	nucleotide binding
T21E8.1	GO:0000166	molecular_function	nucleotide binding
T21E8.2	GO:0000166	molecular_function	nucleotide binding
T21E8.3	GO:0000166	molecular_function	nucleotide binding
T22B2.4	GO:0000166	molecular_function	nucleotide binding
T22D1.10	GO:0000166	molecular_function	nucleotide binding
T23F6.4	GO:0000166	molecular_function	nucleotide binding
T26A5.1	GO:0000166	molecular_function	nucleotide binding
T27E9.7	GO:0000166	molecular_function	nucleotide binding
T27F6.5	GO:0000166	molecular_function	nucleotide binding
T28D9.2	GO:0000166	molecular_function	nucleotide binding
W02B12.2	GO:0000166	molecular_function	nucleotide binding
W02B12.3	GO:0000166	molecular_function	nucleotide binding
W02B12.6	GO:0000166	molecular_function	nucleotide binding
W02D3.11	GO:0000166	molecular_function	nucleotide binding
W03B1.4	GO:0000166	molecular_function	nucleotide binding
W04C9.1	GO:0000166	molecular_function	nucleotide binding
W04D2.6	GO:0000166	molecular_function	nucleotide binding
W09D6.6	GO:0000166	molecular_function	nucleotide binding
Y105E8A.19	GO:0000166	molecular_function	nucleotide binding
Y105E8A.20	GO:0000166	molecular_function	nucleotide binding
Y106G6D.7	GO:0000166	molecular_function	nucleotide binding
Y106G6H.2	GO:0000166	molecular_function	nucleotide binding
Y111B2A.18	GO:0000166	molecular_function	nucleotide binding
Y116A8C.34	GO:0000166	molecular_function	nucleotide binding
Y116A8C.35	GO:0000166	molecular_function	nucleotide binding
Y17G7B.5	GO:0000166	molecular_function	nucleotide binding
Y23H5A.7	GO:0000166	molecular_function	nucleotide binding
Y34D9A.10	GO:0000166	molecular_function	nucleotide binding
Y37A1B.12	GO:0000166	molecular_function	nucleotide binding
Y37B11A.2	GO:0000166	molecular_function	nucleotide binding
Y37D8A.21	GO:0000166	molecular_function	nucleotide binding
Y38F2AR.7	GO:0000166	molecular_function	nucleotide binding
Y39A1A.12	GO:0000166	molecular_function	nucleotide binding
Y39D8C.1	GO:0000166	molecular_function	nucleotide binding
Y39E4B.1	GO:0000166	molecular_function	nucleotide binding
Y39G10AR.14	GO:0000166	molecular_function	nucleotide binding
Y41E3.4	GO:0000166	molecular_function	nucleotide binding
Y42G9A.6	GO:0000166	molecular_function	nucleotide binding
Y43C5A.6	GO:0000166	molecular_function	nucleotide binding
Y43F8C.12	GO:0000166	molecular_function	nucleotide binding
Y43F8C.6	GO:0000166	molecular_function	nucleotide binding
Y46G5A.13	GO:0000166	molecular_function	nucleotide binding
Y46G5A.4	GO:0000166	molecular_function	nucleotide binding
Y47D3A.11	GO:0000166	molecular_function	nucleotide binding
Y47D3A.29	GO:0000166	molecular_function	nucleotide binding
Y47G6A.10	GO:0000166	molecular_function	nucleotide binding
Y47G6A.20	GO:0000166	molecular_function	nucleotide binding
Y48C3A.7	GO:0000166	molecular_function	nucleotide binding
Y48G8AL.11	GO:0000166	molecular_function	nucleotide binding
Y49E10.1	GO:0000166	molecular_function	nucleotide binding
Y50E8A.16	GO:0000166	molecular_function	nucleotide binding
Y53C10A.9	GO:0000166	molecular_function	nucleotide binding
Y54E10A.4	GO:0000166	molecular_function	nucleotide binding
Y54E2A.4	GO:0000166	molecular_function	nucleotide binding
Y54F10BM.2	GO:0000166	molecular_function	nucleotide binding
Y54H5A.3	GO:0000166	molecular_function	nucleotide binding
Y55F3AM.3	GO:0000166	molecular_function	nucleotide binding
Y57G11C.1	GO:0000166	molecular_function	nucleotide binding
Y57G11C.9	GO:0000166	molecular_function	nucleotide binding
Y60A3A.13	GO:0000166	molecular_function	nucleotide binding
Y65B4A.1	GO:0000166	molecular_function	nucleotide binding
Y66D12A.23	GO:0000166	molecular_function	nucleotide binding
Y73B6BL.33	GO:0000166	molecular_function	nucleotide binding
Y73B6BL.6	GO:0000166	molecular_function	nucleotide binding
Y74C10AR.3	GO:0000166	molecular_function	nucleotide binding
Y75B8A.14	GO:0000166	molecular_function	nucleotide binding
Y75B8A.26	GO:0000166	molecular_function	nucleotide binding
Y75B8A.4	GO:0000166	molecular_function	nucleotide binding
Y79H2A.4	GO:0000166	molecular_function	nucleotide binding
Y80D3A.1	GO:0000166	molecular_function	nucleotide binding
Y87G2A.5	GO:0000166	molecular_function	nucleotide binding
Y92C3B.2	GO:0000166	molecular_function	nucleotide binding
ZC404.8	GO:0000166	molecular_function	nucleotide binding
ZC434.5	GO:0000166	molecular_function	nucleotide binding
ZC434.9	GO:0000166	molecular_function	nucleotide binding
ZK1067.6	GO:0000166	molecular_function	nucleotide binding
ZK384.3	GO:0000166	molecular_function	nucleotide binding
ZK455.7	GO:0000166	molecular_function	nucleotide binding
ZK484.2	GO:0000166	molecular_function	nucleotide binding
ZK524.3	GO:0000166	molecular_function	nucleotide binding
ZK863.7	GO:0000166	molecular_function	nucleotide binding
B0564.1	GO:0000175	molecular_function	3'-5'-exoribonuclease activity
BE0003N10.1	GO:0000175	molecular_function	3'-5'-exoribonuclease activity
C14A4.5	GO:0000175	molecular_function	3'-5'-exoribonuclease activity
F31D4.1	GO:0000175	molecular_function	3'-5'-exoribonuclease activity
F37C12.13	GO:0000175	molecular_function	3'-5'-exoribonuclease activity
T07A9.5	GO:0000175	molecular_function	3'-5'-exoribonuclease activity
Y6D11A.1	GO:0000175	molecular_function	3'-5'-exoribonuclease activity
E02H1.1	GO:0000179	molecular_function	rRNA (adenine-N6,N6-)-dimethyltransferase activity
T03F1.7	GO:0000179	molecular_function	rRNA (adenine-N6,N6-)-dimethyltransferase activity
T03G11.6	GO:0000179	molecular_function	rRNA (adenine-N6,N6-)-dimethyltransferase activity
Y56A3A.11	GO:0000213	molecular_function	tRNA-intron endonuclease activity
F56G4.5	GO:0000224	molecular_function	peptide-N4-(N-acetyl-beta-glucosaminyl)asparagine amidase activity
W08F4.3	GO:0000247	molecular_function	C-8 sterol isomerase activity
C34C6.6	GO:0000268	molecular_function	peroxisome targeting sequence binding
B0334.3	GO:0000287	molecular_function	magnesium ion binding
C10C6.1	GO:0000287	molecular_function	magnesium ion binding
C28H8.3	GO:0000287	molecular_function	magnesium ion binding
C30F12.7	GO:0000287	molecular_function	magnesium ion binding
C34F6.8	GO:0000287	molecular_function	magnesium ion binding
C37E2.1	GO:0000287	molecular_function	magnesium ion binding
C37H5.6	GO:0000287	molecular_function	magnesium ion binding
C44B9.1	GO:0000287	molecular_function	magnesium ion binding
C47E12.4	GO:0000287	molecular_function	magnesium ion binding
C54G4.1	GO:0000287	molecular_function	magnesium ion binding
F02C9.3	GO:0000287	molecular_function	magnesium ion binding
F21D5.1	GO:0000287	molecular_function	magnesium ion binding
F22B5.9	GO:0000287	molecular_function	magnesium ion binding
F25B5.3	GO:0000287	molecular_function	magnesium ion binding
F25H5.3	GO:0000287	molecular_function	magnesium ion binding
F35G12.2	GO:0000287	molecular_function	magnesium ion binding
F36H2.1	GO:0000287	molecular_function	magnesium ion binding
F43G9.1	GO:0000287	molecular_function	magnesium ion binding
F53H4.1	GO:0000287	molecular_function	magnesium ion binding
F59A6.6	GO:0000287	molecular_function	magnesium ion binding
F59B8.2	GO:0000287	molecular_function	magnesium ion binding
H06H21.10	GO:0000287	molecular_function	magnesium ion binding
R01H10.6	GO:0000287	molecular_function	magnesium ion binding
R05F9.6	GO:0000287	molecular_function	magnesium ion binding
R151.2	GO:0000287	molecular_function	magnesium ion binding
T01H8.1	GO:0000287	molecular_function	magnesium ion binding
T04G9.4	GO:0000287	molecular_function	magnesium ion binding
T21B10.2	GO:0000287	molecular_function	magnesium ion binding
T24H7.5	GO:0000287	molecular_function	magnesium ion binding
T26C12.1	GO:0000287	molecular_function	magnesium ion binding
T28H10.1	GO:0000287	molecular_function	magnesium ion binding
W04G3.5	GO:0000287	molecular_function	magnesium ion binding
W09D10.2	GO:0000287	molecular_function	magnesium ion binding
W09G3.6	GO:0000287	molecular_function	magnesium ion binding
Y10G11A.1	GO:0000287	molecular_function	magnesium ion binding
Y38A8.1	GO:0000287	molecular_function	magnesium ion binding
Y43F4B.5	GO:0000287	molecular_function	magnesium ion binding
Y49E10.11	GO:0000287	molecular_function	magnesium ion binding
Y60A3A.13	GO:0000287	molecular_function	magnesium ion binding
ZK593.1	GO:0000287	molecular_function	magnesium ion binding
ZK675.2	GO:0000287	molecular_function	magnesium ion binding
K06A4.5	GO:0000334	molecular_function	3-hydroxyanthranilate 3,4-dioxygenase activity
R10E4.5	GO:0000703	molecular_function	oxidized pyrimidine base lesion DNA N-glycosylase activity
C34C12.8	GO:0000774	molecular_function	adenyl-nucleotide exchange factor activity
Y54F10AM.2	GO:0001540	molecular_function	beta-amyloid binding
F15A8.5	GO:0001588	molecular_function	dopamine receptor activity, coupled via Gs
C01G10.8	GO:0001671	molecular_function	ATPase activator activity
C09H6.2	GO:0001784	molecular_function	phosphotyrosine binding
C28A5.3	GO:0001786	molecular_function	phosphatidylserine binding
F29B9.4	GO:0001786	molecular_function	phosphatidylserine binding
T07C4.9	GO:0001786	molecular_function	phosphatidylserine binding
ZC155.1	GO:0001786	molecular_function	phosphatidylserine binding
Y47D3A.29	GO:0001882	molecular_function	nucleoside binding
C34E10.5	GO:0002039	molecular_function	p53 binding
F02E8.6	GO:0003674	molecular_function	molecular_function
F35E8.11	GO:0003674	molecular_function	molecular_function
K02C4.4	GO:0003674	molecular_function	molecular_function
Y119D3B.15	GO:0003674	molecular_function	molecular_function
ZC395.2	GO:0003674	molecular_function	molecular_function
ZK524.1	GO:0003674	molecular_function	molecular_function
B0035.12	GO:0003676	molecular_function	nucleic acid binding
B0041.7	GO:0003676	molecular_function	nucleic acid binding
B0336.3	GO:0003676	molecular_function	nucleic acid binding
B0414.5	GO:0003676	molecular_function	nucleic acid binding
B0414.6	GO:0003676	molecular_function	nucleic acid binding
B0464.1	GO:0003676	molecular_function	nucleic acid binding
B0511.6	GO:0003676	molecular_function	nucleic acid binding
C03B8.4	GO:0003676	molecular_function	nucleic acid binding
C04F12.9	GO:0003676	molecular_function	nucleic acid binding
C04H5.6	GO:0003676	molecular_function	nucleic acid binding
C06E1.10	GO:0003676	molecular_function	nucleic acid binding
C06G3.8	GO:0003676	molecular_function	nucleic acid binding
C07A4.1	GO:0003676	molecular_function	nucleic acid binding
C07E3.1	GO:0003676	molecular_function	nucleic acid binding
C07H6.4	GO:0003676	molecular_function	nucleic acid binding
C07H6.5	GO:0003676	molecular_function	nucleic acid binding
C08B11.5	GO:0003676	molecular_function	nucleic acid binding
C08F8.2	GO:0003676	molecular_function	nucleic acid binding
C09G9.6	GO:0003676	molecular_function	nucleic acid binding
C09H6.1	GO:0003676	molecular_function	nucleic acid binding
C10G6.1	GO:0003676	molecular_function	nucleic acid binding
C14A4.4	GO:0003676	molecular_function	nucleic acid binding
C14C11.6	GO:0003676	molecular_function	nucleic acid binding
C15H11.8	GO:0003676	molecular_function	nucleic acid binding
C16A3.1	GO:0003676	molecular_function	nucleic acid binding
C16A3.4	GO:0003676	molecular_function	nucleic acid binding
C16A3.7	GO:0003676	molecular_function	nucleic acid binding
C17D12.2	GO:0003676	molecular_function	nucleic acid binding
C17E4.5	GO:0003676	molecular_function	nucleic acid binding
C17G10.4	GO:0003676	molecular_function	nucleic acid binding
C18A3.1	GO:0003676	molecular_function	nucleic acid binding
C18A3.5	GO:0003676	molecular_function	nucleic acid binding
C18D11.4	GO:0003676	molecular_function	nucleic acid binding
C24H12.4	GO:0003676	molecular_function	nucleic acid binding
C25A1.4	GO:0003676	molecular_function	nucleic acid binding
C26D10.2	GO:0003676	molecular_function	nucleic acid binding
C26E6.9	GO:0003676	molecular_function	nucleic acid binding
C27A2.7	GO:0003676	molecular_function	nucleic acid binding
C27B7.4	GO:0003676	molecular_function	nucleic acid binding
C27C12.2	GO:0003676	molecular_function	nucleic acid binding
C27H5.3	GO:0003676	molecular_function	nucleic acid binding
C28H8.3	GO:0003676	molecular_function	nucleic acid binding
C30B5.3	GO:0003676	molecular_function	nucleic acid binding
C30B5.4	GO:0003676	molecular_function	nucleic acid binding
C33C12.9	GO:0003676	molecular_function	nucleic acid binding
C33H5.12	GO:0003676	molecular_function	nucleic acid binding
C33H5.17	GO:0003676	molecular_function	nucleic acid binding
C34H3.2	GO:0003676	molecular_function	nucleic acid binding
C38D4.9	GO:0003676	molecular_function	nucleic acid binding
C40H1.1	GO:0003676	molecular_function	nucleic acid binding
C41D11.7	GO:0003676	molecular_function	nucleic acid binding
C41D11.8	GO:0003676	molecular_function	nucleic acid binding
C41G7.1	GO:0003676	molecular_function	nucleic acid binding
C43E11.1	GO:0003676	molecular_function	nucleic acid binding
C44B7.2	GO:0003676	molecular_function	nucleic acid binding
C44E4.4	GO:0003676	molecular_function	nucleic acid binding
C46F11.4	GO:0003676	molecular_function	nucleic acid binding
C46H11.3	GO:0003676	molecular_function	nucleic acid binding
C47C12.3	GO:0003676	molecular_function	nucleic acid binding
C49H3.5	GO:0003676	molecular_function	nucleic acid binding
C50B8.1	GO:0003676	molecular_function	nucleic acid binding
C50D2.5	GO:0003676	molecular_function	nucleic acid binding
C52B9.8	GO:0003676	molecular_function	nucleic acid binding
C55B7.1	GO:0003676	molecular_function	nucleic acid binding
C55B7.12	GO:0003676	molecular_function	nucleic acid binding
C56G2.1	GO:0003676	molecular_function	nucleic acid binding
D1007.7	GO:0003676	molecular_function	nucleic acid binding
D1037.1	GO:0003676	molecular_function	nucleic acid binding
D2005.5	GO:0003676	molecular_function	nucleic acid binding
D2089.1	GO:0003676	molecular_function	nucleic acid binding
D2089.4	GO:0003676	molecular_function	nucleic acid binding
E03A3.2	GO:0003676	molecular_function	nucleic acid binding
EEED8.12	GO:0003676	molecular_function	nucleic acid binding
EEED8.4	GO:0003676	molecular_function	nucleic acid binding
EEED8.5	GO:0003676	molecular_function	nucleic acid binding
EEED8.7	GO:0003676	molecular_function	nucleic acid binding
F01F1.7	GO:0003676	molecular_function	nucleic acid binding
F01G4.1	GO:0003676	molecular_function	nucleic acid binding
F01G4.3	GO:0003676	molecular_function	nucleic acid binding
F02E9.2	GO:0003676	molecular_function	nucleic acid binding
F07A11.6	GO:0003676	molecular_function	nucleic acid binding
F07E5.5	GO:0003676	molecular_function	nucleic acid binding
F08B4.1	GO:0003676	molecular_function	nucleic acid binding
F08B4.7	GO:0003676	molecular_function	nucleic acid binding
F08C6.7	GO:0003676	molecular_function	nucleic acid binding
F10C2.4	GO:0003676	molecular_function	nucleic acid binding
F10C2.6	GO:0003676	molecular_function	nucleic acid binding
F10G7.2	GO:0003676	molecular_function	nucleic acid binding
F11A10.2	GO:0003676	molecular_function	nucleic acid binding
F11A10.7	GO:0003676	molecular_function	nucleic acid binding
F11A10.8	GO:0003676	molecular_function	nucleic acid binding
F13H6.1	GO:0003676	molecular_function	nucleic acid binding
F15B10.2	GO:0003676	molecular_function	nucleic acid binding
F15C11.1	GO:0003676	molecular_function	nucleic acid binding
F15D4.1	GO:0003676	molecular_function	nucleic acid binding
F18A1.5	GO:0003676	molecular_function	nucleic acid binding
F18C5.2	GO:0003676	molecular_function	nucleic acid binding
F18H3.3	GO:0003676	molecular_function	nucleic acid binding
F22B5.2	GO:0003676	molecular_function	nucleic acid binding
F22D6.3	GO:0003676	molecular_function	nucleic acid binding
F25B5.7	GO:0003676	molecular_function	nucleic acid binding
F25D7.3	GO:0003676	molecular_function	nucleic acid binding
F25H2.13	GO:0003676	molecular_function	nucleic acid binding
F26A10.2	GO:0003676	molecular_function	nucleic acid binding
F26A3.2	GO:0003676	molecular_function	nucleic acid binding
F26F12.7	GO:0003676	molecular_function	nucleic acid binding
F27D4.4	GO:0003676	molecular_function	nucleic acid binding
F28F9.1	GO:0003676	molecular_function	nucleic acid binding
F28H1.3	GO:0003676	molecular_function	nucleic acid binding
F29C4.7	GO:0003676	molecular_function	nucleic acid binding
F32A11.6	GO:0003676	molecular_function	nucleic acid binding
F32B4.4	GO:0003676	molecular_function	nucleic acid binding
F33A8.3	GO:0003676	molecular_function	nucleic acid binding
F33A8.4	GO:0003676	molecular_function	nucleic acid binding
F33D11.10	GO:0003676	molecular_function	nucleic acid binding
F33H2.1	GO:0003676	molecular_function	nucleic acid binding
F33H2.5	GO:0003676	molecular_function	nucleic acid binding
F34D10.5	GO:0003676	molecular_function	nucleic acid binding
F35H8.5	GO:0003676	molecular_function	nucleic acid binding
F36F2.3	GO:0003676	molecular_function	nucleic acid binding
F37A4.8	GO:0003676	molecular_function	nucleic acid binding
F38B7.1	GO:0003676	molecular_function	nucleic acid binding
F39B2.1	GO:0003676	molecular_function	nucleic acid binding
F39H2.2	GO:0003676	molecular_function	nucleic acid binding
F42A6.7	GO:0003676	molecular_function	nucleic acid binding
F43G9.11	GO:0003676	molecular_function	nucleic acid binding
F44G4.4	GO:0003676	molecular_function	nucleic acid binding
F45B8.4	GO:0003676	molecular_function	nucleic acid binding
F45G2.9	GO:0003676	molecular_function	nucleic acid binding
F46A9.6	GO:0003676	molecular_function	nucleic acid binding
F46F11.2	GO:0003676	molecular_function	nucleic acid binding
F46H5.4	GO:0003676	molecular_function	nucleic acid binding
F47E1.3	GO:0003676	molecular_function	nucleic acid binding
F49E10.5	GO:0003676	molecular_function	nucleic acid binding
F49H12.1	GO:0003676	molecular_function	nucleic acid binding
F52B5.3	GO:0003676	molecular_function	nucleic acid binding
F52F12.4	GO:0003676	molecular_function	nucleic acid binding
F53F8.1	GO:0003676	molecular_function	nucleic acid binding
F53H1.1	GO:0003676	molecular_function	nucleic acid binding
F53H4.1	GO:0003676	molecular_function	nucleic acid binding
F54E12.2	GO:0003676	molecular_function	nucleic acid binding
F54H5.4	GO:0003676	molecular_function	nucleic acid binding
F55F8.2	GO:0003676	molecular_function	nucleic acid binding
F56A8.6	GO:0003676	molecular_function	nucleic acid binding
F56D1.7	GO:0003676	molecular_function	nucleic acid binding
F56D2.6	GO:0003676	molecular_function	nucleic acid binding
F56F11.3	GO:0003676	molecular_function	nucleic acid binding
F56G4.4	GO:0003676	molecular_function	nucleic acid binding
F57B9.3	GO:0003676	molecular_function	nucleic acid binding
F57B9.6	GO:0003676	molecular_function	nucleic acid binding
F58B3.7	GO:0003676	molecular_function	nucleic acid binding
F58D5.1	GO:0003676	molecular_function	nucleic acid binding
F58E10.3	GO:0003676	molecular_function	nucleic acid binding
F58G11.2	GO:0003676	molecular_function	nucleic acid binding
F58G11.5	GO:0003676	molecular_function	nucleic acid binding
F59A6.6	GO:0003676	molecular_function	nucleic acid binding
F59A7.8	GO:0003676	molecular_function	nucleic acid binding
H06I04.3	GO:0003676	molecular_function	nucleic acid binding
H06O01.2	GO:0003676	molecular_function	nucleic acid binding
H20J04.4	GO:0003676	molecular_function	nucleic acid binding
H24K24.4	GO:0003676	molecular_function	nucleic acid binding
H27M09.1	GO:0003676	molecular_function	nucleic acid binding
H28G03.1	GO:0003676	molecular_function	nucleic acid binding
K01G5.1	GO:0003676	molecular_function	nucleic acid binding
K02D7.2	GO:0003676	molecular_function	nucleic acid binding
K02F2.3	GO:0003676	molecular_function	nucleic acid binding
K02F3.11	GO:0003676	molecular_function	nucleic acid binding
K02F3.12	GO:0003676	molecular_function	nucleic acid binding
K02H8.1	GO:0003676	molecular_function	nucleic acid binding
K03H1.2	GO:0003676	molecular_function	nucleic acid binding
K04G7.10	GO:0003676	molecular_function	nucleic acid binding
K07B1.7	GO:0003676	molecular_function	nucleic acid binding
K07C5.6	GO:0003676	molecular_function	nucleic acid binding
K07H8.10	GO:0003676	molecular_function	nucleic acid binding
K08D10.3	GO:0003676	molecular_function	nucleic acid binding
K08D10.4	GO:0003676	molecular_function	nucleic acid binding
K08D12.3	GO:0003676	molecular_function	nucleic acid binding
K08F4.2	GO:0003676	molecular_function	nucleic acid binding
K11D2.4	GO:0003676	molecular_function	nucleic acid binding
K11G9.4	GO:0003676	molecular_function	nucleic acid binding
K12H4.8	GO:0003676	molecular_function	nucleic acid binding
M01E11.5	GO:0003676	molecular_function	nucleic acid binding
M03C11.2	GO:0003676	molecular_function	nucleic acid binding
M03C11.8	GO:0003676	molecular_function	nucleic acid binding
M03D4.4	GO:0003676	molecular_function	nucleic acid binding
M142.8	GO:0003676	molecular_function	nucleic acid binding
M163.2	GO:0003676	molecular_function	nucleic acid binding
M18.5	GO:0003676	molecular_function	nucleic acid binding
R05D11.4	GO:0003676	molecular_function	nucleic acid binding
R05H10.2	GO:0003676	molecular_function	nucleic acid binding
R06C1.4	GO:0003676	molecular_function	nucleic acid binding
R07E5.1	GO:0003676	molecular_function	nucleic acid binding
R07E5.14	GO:0003676	molecular_function	nucleic acid binding
R09B3.2	GO:0003676	molecular_function	nucleic acid binding
R09B3.3	GO:0003676	molecular_function	nucleic acid binding
R10E4.2	GO:0003676	molecular_function	nucleic acid binding
R10E9.1	GO:0003676	molecular_function	nucleic acid binding
R11A8.2	GO:0003676	molecular_function	nucleic acid binding
R11E3.6	GO:0003676	molecular_function	nucleic acid binding
R53.3	GO:0003676	molecular_function	nucleic acid binding
R74.5	GO:0003676	molecular_function	nucleic acid binding
R74.7	GO:0003676	molecular_function	nucleic acid binding
T01D1.2	GO:0003676	molecular_function	nucleic acid binding
T02G5.9	GO:0003676	molecular_function	nucleic acid binding
T03F6.2	GO:0003676	molecular_function	nucleic acid binding
T04A11.6	GO:0003676	molecular_function	nucleic acid binding
T04A8.6	GO:0003676	molecular_function	nucleic acid binding
T04D1.4	GO:0003676	molecular_function	nucleic acid binding
T04H1.5	GO:0003676	molecular_function	nucleic acid binding
T05A12.4	GO:0003676	molecular_function	nucleic acid binding
T05E8.3	GO:0003676	molecular_function	nucleic acid binding
T06A10.1	GO:0003676	molecular_function	nucleic acid binding
T07A9.5	GO:0003676	molecular_function	nucleic acid binding
T07D1.4	GO:0003676	molecular_function	nucleic acid binding
T07D4.3	GO:0003676	molecular_function	nucleic acid binding
T07D4.4	GO:0003676	molecular_function	nucleic acid binding
T07F10.3	GO:0003676	molecular_function	nucleic acid binding
T08B2.5	GO:0003676	molecular_function	nucleic acid binding
T11G6.8	GO:0003676	molecular_function	nucleic acid binding
T12D8.2	GO:0003676	molecular_function	nucleic acid binding
T12F5.3	GO:0003676	molecular_function	nucleic acid binding
T14G8.1	GO:0003676	molecular_function	nucleic acid binding
T21G5.3	GO:0003676	molecular_function	nucleic acid binding
T22B2.4	GO:0003676	molecular_function	nucleic acid binding
T22C8.5	GO:0003676	molecular_function	nucleic acid binding
T23F6.4	GO:0003676	molecular_function	nucleic acid binding
T23G7.3	GO:0003676	molecular_function	nucleic acid binding
T23H2.3	GO:0003676	molecular_function	nucleic acid binding
T24H10.1	GO:0003676	molecular_function	nucleic acid binding
T26A8.4	GO:0003676	molecular_function	nucleic acid binding
T26G10.1	GO:0003676	molecular_function	nucleic acid binding
T28D9.2	GO:0003676	molecular_function	nucleic acid binding
W02B12.2	GO:0003676	molecular_function	nucleic acid binding
W02B12.3	GO:0003676	molecular_function	nucleic acid binding
W02D3.11	GO:0003676	molecular_function	nucleic acid binding
W02H5.4	GO:0003676	molecular_function	nucleic acid binding
W03A3.2	GO:0003676	molecular_function	nucleic acid binding
W03C9.4	GO:0003676	molecular_function	nucleic acid binding
W04D2.6	GO:0003676	molecular_function	nucleic acid binding
W06D4.6	GO:0003676	molecular_function	nucleic acid binding
W06H12.1	GO:0003676	molecular_function	nucleic acid binding
W08D2.7	GO:0003676	molecular_function	nucleic acid binding
Y106G6D.7	GO:0003676	molecular_function	nucleic acid binding
Y106G6H.2	GO:0003676	molecular_function	nucleic acid binding
Y111B2A.18	GO:0003676	molecular_function	nucleic acid binding
Y111B2A.22	GO:0003676	molecular_function	nucleic acid binding
Y113G7B.14	GO:0003676	molecular_function	nucleic acid binding
Y116A8C.13	GO:0003676	molecular_function	nucleic acid binding
Y116A8C.32	GO:0003676	molecular_function	nucleic acid binding
Y116A8C.34	GO:0003676	molecular_function	nucleic acid binding
Y116A8C.35	GO:0003676	molecular_function	nucleic acid binding
Y23H5B.6	GO:0003676	molecular_function	nucleic acid binding
Y37A1B.1	GO:0003676	molecular_function	nucleic acid binding
Y37B11A.2	GO:0003676	molecular_function	nucleic acid binding
Y37D8A.21	GO:0003676	molecular_function	nucleic acid binding
Y37E11AM.1	GO:0003676	molecular_function	nucleic acid binding
Y38A10A.6	GO:0003676	molecular_function	nucleic acid binding
Y38H8A.5	GO:0003676	molecular_function	nucleic acid binding
Y39A1C.3	GO:0003676	molecular_function	nucleic acid binding
Y40B1A.4	GO:0003676	molecular_function	nucleic acid binding
Y40D12A.1	GO:0003676	molecular_function	nucleic acid binding
Y41E3.11	GO:0003676	molecular_function	nucleic acid binding
Y46G5A.13	GO:0003676	molecular_function	nucleic acid binding
Y46G5A.4	GO:0003676	molecular_function	nucleic acid binding
Y47D3A.29	GO:0003676	molecular_function	nucleic acid binding
Y47D3A.6	GO:0003676	molecular_function	nucleic acid binding
Y47G6A.20	GO:0003676	molecular_function	nucleic acid binding
Y48C3A.14	GO:0003676	molecular_function	nucleic acid binding
Y48G8AL.10	GO:0003676	molecular_function	nucleic acid binding
Y50D4C.3	GO:0003676	molecular_function	nucleic acid binding
Y50D7A.2	GO:0003676	molecular_function	nucleic acid binding
Y53F4B.13	GO:0003676	molecular_function	nucleic acid binding
Y53G8AR.6	GO:0003676	molecular_function	nucleic acid binding
Y53G8AR.9	GO:0003676	molecular_function	nucleic acid binding
Y54E10A.4	GO:0003676	molecular_function	nucleic acid binding
Y54E10A.9	GO:0003676	molecular_function	nucleic acid binding
Y54E10BR.8	GO:0003676	molecular_function	nucleic acid binding
Y54E2A.4	GO:0003676	molecular_function	nucleic acid binding
Y54G11A.3	GO:0003676	molecular_function	nucleic acid binding
Y54H5A.3	GO:0003676	molecular_function	nucleic acid binding
Y55B1AL.3	GO:0003676	molecular_function	nucleic acid binding
Y55D9A.2	GO:0003676	molecular_function	nucleic acid binding
Y55F3AM.14	GO:0003676	molecular_function	nucleic acid binding
Y55F3AM.3	GO:0003676	molecular_function	nucleic acid binding
Y55F3AM.6	GO:0003676	molecular_function	nucleic acid binding
Y55F3AM.7	GO:0003676	molecular_function	nucleic acid binding
Y55F3BR.1	GO:0003676	molecular_function	nucleic acid binding
Y56A3A.11	GO:0003676	molecular_function	nucleic acid binding
Y56A3A.27	GO:0003676	molecular_function	nucleic acid binding
Y56A3A.28	GO:0003676	molecular_function	nucleic acid binding
Y57A10A.13	GO:0003676	molecular_function	nucleic acid binding
Y57G11C.9	GO:0003676	molecular_function	nucleic acid binding
Y59A8B.21	GO:0003676	molecular_function	nucleic acid binding
Y62E10A.2	GO:0003676	molecular_function	nucleic acid binding
Y65B4A.1	GO:0003676	molecular_function	nucleic acid binding
Y65B4A.6	GO:0003676	molecular_function	nucleic acid binding
Y66D12A.15	GO:0003676	molecular_function	nucleic acid binding
Y66D12A.23	GO:0003676	molecular_function	nucleic acid binding
Y67D2.6	GO:0003676	molecular_function	nucleic acid binding
Y71F9AL.1	GO:0003676	molecular_function	nucleic acid binding
Y71G12B.8	GO:0003676	molecular_function	nucleic acid binding
Y71H2AM.19	GO:0003676	molecular_function	nucleic acid binding
Y73B6BL.33	GO:0003676	molecular_function	nucleic acid binding
Y73B6BL.6	GO:0003676	molecular_function	nucleic acid binding
Y76B12C.7	GO:0003676	molecular_function	nucleic acid binding
Y77E11A.6	GO:0003676	molecular_function	nucleic acid binding
Y92C3B.2	GO:0003676	molecular_function	nucleic acid binding
Y94H6A.11	GO:0003676	molecular_function	nucleic acid binding
Y94H6A.5	GO:0003676	molecular_function	nucleic acid binding
Y95B8A.7	GO:0003676	molecular_function	nucleic acid binding
Y97E10AR.5	GO:0003676	molecular_function	nucleic acid binding
ZC123.3	GO:0003676	molecular_function	nucleic acid binding
ZC317.1	GO:0003676	molecular_function	nucleic acid binding
ZC328.2	GO:0003676	molecular_function	nucleic acid binding
ZC404.8	GO:0003676	molecular_function	nucleic acid binding
ZC513.6	GO:0003676	molecular_function	nucleic acid binding
ZK1067.6	GO:0003676	molecular_function	nucleic acid binding
ZK1098.3	GO:0003676	molecular_function	nucleic acid binding
ZK1098.8	GO:0003676	molecular_function	nucleic acid binding
ZK121.2	GO:0003676	molecular_function	nucleic acid binding
ZK1320.7	GO:0003676	molecular_function	nucleic acid binding
ZK337.2	GO:0003676	molecular_function	nucleic acid binding
ZK512.2	GO:0003676	molecular_function	nucleic acid binding
ZK632.14	GO:0003676	molecular_function	nucleic acid binding
ZK675.3	GO:0003676	molecular_function	nucleic acid binding
ZK686.2	GO:0003676	molecular_function	nucleic acid binding
ZK686.4	GO:0003676	molecular_function	nucleic acid binding
ZK863.7	GO:0003676	molecular_function	nucleic acid binding
ZK867.1	GO:0003676	molecular_function	nucleic acid binding
B0035.10	GO:0003677	molecular_function	DNA binding
B0035.7	GO:0003677	molecular_function	DNA binding
B0035.8	GO:0003677	molecular_function	DNA binding
B0035.9	GO:0003677	molecular_function	DNA binding
B0041.7	GO:0003677	molecular_function	DNA binding
B0261.1	GO:0003677	molecular_function	DNA binding
B0414.2	GO:0003677	molecular_function	DNA binding
B0414.3	GO:0003677	molecular_function	DNA binding
B0414.6	GO:0003677	molecular_function	DNA binding
B0464.7	GO:0003677	molecular_function	DNA binding
B0511.6	GO:0003677	molecular_function	DNA binding
B0564.10	GO:0003677	molecular_function	DNA binding
C01B12.2	GO:0003677	molecular_function	DNA binding
C01G8.9	GO:0003677	molecular_function	DNA binding
C01H6.5	GO:0003677	molecular_function	DNA binding
C04A2.3	GO:0003677	molecular_function	DNA binding
C04F1.3	GO:0003677	molecular_function	DNA binding
C04G2.7	GO:0003677	molecular_function	DNA binding
C06A1.5	GO:0003677	molecular_function	DNA binding
C07A12.3	GO:0003677	molecular_function	DNA binding
C07H6.1	GO:0003677	molecular_function	DNA binding
C07H6.7	GO:0003677	molecular_function	DNA binding
C08B11.3	GO:0003677	molecular_function	DNA binding
C08C3.3	GO:0003677	molecular_function	DNA binding
C08F8.8	GO:0003677	molecular_function	DNA binding
C09G12.1	GO:0003677	molecular_function	DNA binding
C10G8.7	GO:0003677	molecular_function	DNA binding
C12D12.5	GO:0003677	molecular_function	DNA binding
C13G5.1	GO:0003677	molecular_function	DNA binding
C14A4.10	GO:0003677	molecular_function	DNA binding
C14B9.6	GO:0003677	molecular_function	DNA binding
C14C11.6	GO:0003677	molecular_function	DNA binding
C16A3.1	GO:0003677	molecular_function	DNA binding
C16C2.1	GO:0003677	molecular_function	DNA binding
C17E4.6	GO:0003677	molecular_function	DNA binding
C17H12.9	GO:0003677	molecular_function	DNA binding
C18A3.8	GO:0003677	molecular_function	DNA binding
C18B12.3	GO:0003677	molecular_function	DNA binding
C18G1.5	GO:0003677	molecular_function	DNA binding
C25A1.11	GO:0003677	molecular_function	DNA binding
C25D7.6	GO:0003677	molecular_function	DNA binding
C25G4.4	GO:0003677	molecular_function	DNA binding
C26C6.1	GO:0003677	molecular_function	DNA binding
C26E6.4	GO:0003677	molecular_function	DNA binding
C27A12.5	GO:0003677	molecular_function	DNA binding
C27B7.4	GO:0003677	molecular_function	DNA binding
C27C12.6	GO:0003677	molecular_function	DNA binding
C28A5.4	GO:0003677	molecular_function	DNA binding
C28H8.3	GO:0003677	molecular_function	DNA binding
C29A12.3	GO:0003677	molecular_function	DNA binding
C30A5.7	GO:0003677	molecular_function	DNA binding
C30G7.1	GO:0003677	molecular_function	DNA binding
C32E12.5	GO:0003677	molecular_function	DNA binding
C32F10.5	GO:0003677	molecular_function	DNA binding
C33D12.1	GO:0003677	molecular_function	DNA binding
C33D12.7	GO:0003677	molecular_function	DNA binding
C34C6.8	GO:0003677	molecular_function	DNA binding
C36F7.1	GO:0003677	molecular_function	DNA binding
C37E2.4	GO:0003677	molecular_function	DNA binding
C37E2.5	GO:0003677	molecular_function	DNA binding
C38D4.6	GO:0003677	molecular_function	DNA binding
C38D4.9	GO:0003677	molecular_function	DNA binding
C39E6.4	GO:0003677	molecular_function	DNA binding
C39E9.13	GO:0003677	molecular_function	DNA binding
C40H5.5	GO:0003677	molecular_function	DNA binding
C41D11.7	GO:0003677	molecular_function	DNA binding
C41G7.5	GO:0003677	molecular_function	DNA binding
C42D4.8	GO:0003677	molecular_function	DNA binding
C43E11.2	GO:0003677	molecular_function	DNA binding
C44F1.2	GO:0003677	molecular_function	DNA binding
C45E1.1	GO:0003677	molecular_function	DNA binding
C47D12.8	GO:0003677	molecular_function	DNA binding
C48D5.1	GO:0003677	molecular_function	DNA binding
C48E7.2	GO:0003677	molecular_function	DNA binding
C50F4.13	GO:0003677	molecular_function	DNA binding
C50F4.5	GO:0003677	molecular_function	DNA binding
C50F4.7	GO:0003677	molecular_function	DNA binding
C52B9.8	GO:0003677	molecular_function	DNA binding
C54G10.2	GO:0003677	molecular_function	DNA binding
C55B7.1	GO:0003677	molecular_function	DNA binding
D1007.1	GO:0003677	molecular_function	DNA binding
D1014.8	GO:0003677	molecular_function	DNA binding
D1081.8	GO:0003677	molecular_function	DNA binding
D2005.3	GO:0003677	molecular_function	DNA binding
D2005.5	GO:0003677	molecular_function	DNA binding
E03A3.3	GO:0003677	molecular_function	DNA binding
E03A3.4	GO:0003677	molecular_function	DNA binding
F01G4.1	GO:0003677	molecular_function	DNA binding
F02E9.2	GO:0003677	molecular_function	DNA binding
F07B7.10	GO:0003677	molecular_function	DNA binding
F07B7.11	GO:0003677	molecular_function	DNA binding
F07B7.3	GO:0003677	molecular_function	DNA binding
F07B7.4	GO:0003677	molecular_function	DNA binding
F07B7.5	GO:0003677	molecular_function	DNA binding
F07B7.9	GO:0003677	molecular_function	DNA binding
F08B4.5	GO:0003677	molecular_function	DNA binding
F08G2.1	GO:0003677	molecular_function	DNA binding
F08G2.2	GO:0003677	molecular_function	DNA binding
F08G2.3	GO:0003677	molecular_function	DNA binding
F09F7.3	GO:0003677	molecular_function	DNA binding
F10C1.5	GO:0003677	molecular_function	DNA binding
F10C2.4	GO:0003677	molecular_function	DNA binding
F11A1.3	GO:0003677	molecular_function	DNA binding
F11C1.6	GO:0003677	molecular_function	DNA binding
F12F6.7	GO:0003677	molecular_function	DNA binding
F14B4.3	GO:0003677	molecular_function	DNA binding
F14F3.1	GO:0003677	molecular_function	DNA binding
F15B10.2	GO:0003677	molecular_function	DNA binding
F15D4.1	GO:0003677	molecular_function	DNA binding
F16H11.4	GO:0003677	molecular_function	DNA binding
F17A2.5	GO:0003677	molecular_function	DNA binding
F17E9.10	GO:0003677	molecular_function	DNA binding
F17E9.12	GO:0003677	molecular_function	DNA binding
F17E9.13	GO:0003677	molecular_function	DNA binding
F17E9.9	GO:0003677	molecular_function	DNA binding
F18A1.5	GO:0003677	molecular_function	DNA binding
F18E2.3	GO:0003677	molecular_function	DNA binding
F20D6.9	GO:0003677	molecular_function	DNA binding
F21D5.4	GO:0003677	molecular_function	DNA binding
F22A3.5	GO:0003677	molecular_function	DNA binding
F22B3.1	GO:0003677	molecular_function	DNA binding
F22B3.2	GO:0003677	molecular_function	DNA binding
F22D6.2	GO:0003677	molecular_function	DNA binding
F22F1.1	GO:0003677	molecular_function	DNA binding
F23B2.13	GO:0003677	molecular_function	DNA binding
F23F1.1	GO:0003677	molecular_function	DNA binding
F25B3.6	GO:0003677	molecular_function	DNA binding
F25H2.13	GO:0003677	molecular_function	DNA binding
F26C11.2	GO:0003677	molecular_function	DNA binding
F26F12.7	GO:0003677	molecular_function	DNA binding
F27E5.2	GO:0003677	molecular_function	DNA binding
F28B3.7	GO:0003677	molecular_function	DNA binding
F28F9.1	GO:0003677	molecular_function	DNA binding
F29F11.5	GO:0003677	molecular_function	DNA binding
F31E3.1	GO:0003677	molecular_function	DNA binding
F31E8.3	GO:0003677	molecular_function	DNA binding
F32A5.1	GO:0003677	molecular_function	DNA binding
F32D1.10	GO:0003677	molecular_function	DNA binding
F32H2.1	GO:0003677	molecular_function	DNA binding
F33A8.3	GO:0003677	molecular_function	DNA binding
F33D11.4	GO:0003677	molecular_function	DNA binding
F33D4.1	GO:0003677	molecular_function	DNA binding
F33H1.1	GO:0003677	molecular_function	DNA binding
F33H2.1	GO:0003677	molecular_function	DNA binding
F33H2.5	GO:0003677	molecular_function	DNA binding
F35H10.1	GO:0003677	molecular_function	DNA binding
F35H10.11	GO:0003677	molecular_function	DNA binding
F36A4.7	GO:0003677	molecular_function	DNA binding
F37A4.8	GO:0003677	molecular_function	DNA binding
F38A5.13	GO:0003677	molecular_function	DNA binding
F39H11.2	GO:0003677	molecular_function	DNA binding
F40E10.2	GO:0003677	molecular_function	DNA binding
F40F9.7	GO:0003677	molecular_function	DNA binding
F43D9.5	GO:0003677	molecular_function	DNA binding
F43G6.1	GO:0003677	molecular_function	DNA binding
F43G9.12	GO:0003677	molecular_function	DNA binding
F44A6.2	GO:0003677	molecular_function	DNA binding
F44B9.8	GO:0003677	molecular_function	DNA binding
F45E1.6	GO:0003677	molecular_function	DNA binding
F45E4.9	GO:0003677	molecular_function	DNA binding
F45F2.12	GO:0003677	molecular_function	DNA binding
F45F2.13	GO:0003677	molecular_function	DNA binding
F45F2.2	GO:0003677	molecular_function	DNA binding
F45F2.3	GO:0003677	molecular_function	DNA binding
F45F2.4	GO:0003677	molecular_function	DNA binding
F45G2.3	GO:0003677	molecular_function	DNA binding
F45H11.6	GO:0003677	molecular_function	DNA binding
F46C8.5	GO:0003677	molecular_function	DNA binding
F46F11.2	GO:0003677	molecular_function	DNA binding
F46F3.1	GO:0003677	molecular_function	DNA binding
F47D12.4	GO:0003677	molecular_function	DNA binding
F48D6.1	GO:0003677	molecular_function	DNA binding
F53A2.5	GO:0003677	molecular_function	DNA binding
F53H10.2	GO:0003677	molecular_function	DNA binding
F53H4.1	GO:0003677	molecular_function	DNA binding
F53H4.5	GO:0003677	molecular_function	DNA binding
F53H4.6	GO:0003677	molecular_function	DNA binding
F54A5.1	GO:0003677	molecular_function	DNA binding
F54E12.1	GO:0003677	molecular_function	DNA binding
F54E12.2	GO:0003677	molecular_function	DNA binding
F54E12.3	GO:0003677	molecular_function	DNA binding
F54E12.4	GO:0003677	molecular_function	DNA binding
F54E12.5	GO:0003677	molecular_function	DNA binding
F54F2.9	GO:0003677	molecular_function	DNA binding
F55B12.1	GO:0003677	molecular_function	DNA binding
F55D12.4	GO:0003677	molecular_function	DNA binding
F55G1.10	GO:0003677	molecular_function	DNA binding
F55G1.11	GO:0003677	molecular_function	DNA binding
F55G1.2	GO:0003677	molecular_function	DNA binding
F55G1.3	GO:0003677	molecular_function	DNA binding
F56E3.4	GO:0003677	molecular_function	DNA binding
F57B10.6	GO:0003677	molecular_function	DNA binding
F58A4.9	GO:0003677	molecular_function	DNA binding
F58E6.10	GO:0003677	molecular_function	DNA binding
F59A7.4	GO:0003677	molecular_function	DNA binding
F59A7.8	GO:0003677	molecular_function	DNA binding
H02I12.6	GO:0003677	molecular_function	DNA binding
H02I12.7	GO:0003677	molecular_function	DNA binding
H06O01.2	GO:0003677	molecular_function	DNA binding
H19N07.4	GO:0003677	molecular_function	DNA binding
H26D21.2	GO:0003677	molecular_function	DNA binding
H27M09.2	GO:0003677	molecular_function	DNA binding
K02B12.1	GO:0003677	molecular_function	DNA binding
K02F3.12	GO:0003677	molecular_function	DNA binding
K03A1.6	GO:0003677	molecular_function	DNA binding
K03A11.3	GO:0003677	molecular_function	DNA binding
K03E6.1	GO:0003677	molecular_function	DNA binding
K04C2.2	GO:0003677	molecular_function	DNA binding
K06B9.5	GO:0003677	molecular_function	DNA binding
K06C4.10	GO:0003677	molecular_function	DNA binding
K06C4.11	GO:0003677	molecular_function	DNA binding
K06C4.12	GO:0003677	molecular_function	DNA binding
K06C4.13	GO:0003677	molecular_function	DNA binding
K06C4.2	GO:0003677	molecular_function	DNA binding
K06C4.3	GO:0003677	molecular_function	DNA binding
K06C4.4	GO:0003677	molecular_function	DNA binding
K06C4.5	GO:0003677	molecular_function	DNA binding
K07A1.8	GO:0003677	molecular_function	DNA binding
K07C11.1	GO:0003677	molecular_function	DNA binding
K07C5.3	GO:0003677	molecular_function	DNA binding
K08A8.2	GO:0003677	molecular_function	DNA binding
K08B4.1	GO:0003677	molecular_function	DNA binding
K09A11.1	GO:0003677	molecular_function	DNA binding
K10C3.6	GO:0003677	molecular_function	DNA binding
K10D3.3	GO:0003677	molecular_function	DNA binding
K12D12.1	GO:0003677	molecular_function	DNA binding
K12H4.1	GO:0003677	molecular_function	DNA binding
K12H4.8	GO:0003677	molecular_function	DNA binding
M01E11.5	GO:0003677	molecular_function	DNA binding
M01E5.5	GO:0003677	molecular_function	DNA binding
M03C11.2	GO:0003677	molecular_function	DNA binding
M03C11.8	GO:0003677	molecular_function	DNA binding
M142.4	GO:0003677	molecular_function	DNA binding
M163.3	GO:0003677	molecular_function	DNA binding
M6.3	GO:0003677	molecular_function	DNA binding
R01H10.1	GO:0003677	molecular_function	DNA binding
R03C1.3	GO:0003677	molecular_function	DNA binding
R05D11.4	GO:0003677	molecular_function	DNA binding
R05D3.1	GO:0003677	molecular_function	DNA binding
R05D3.11	GO:0003677	molecular_function	DNA binding
R07B1.1	GO:0003677	molecular_function	DNA binding
R07E5.8	GO:0003677	molecular_function	DNA binding
R08B4.2	GO:0003677	molecular_function	DNA binding
R08C7.3	GO:0003677	molecular_function	DNA binding
R09B3.1	GO:0003677	molecular_function	DNA binding
R10E4.4	GO:0003677	molecular_function	DNA binding
R10E4.5	GO:0003677	molecular_function	DNA binding
R13A5.5	GO:0003677	molecular_function	DNA binding
R151.8	GO:0003677	molecular_function	DNA binding
T01B10.4	GO:0003677	molecular_function	DNA binding
T01C1.2	GO:0003677	molecular_function	DNA binding
T02C5.5	GO:0003677	molecular_function	DNA binding
T04D1.4	GO:0003677	molecular_function	DNA binding
T05A12.4	GO:0003677	molecular_function	DNA binding
T05E11.4	GO:0003677	molecular_function	DNA binding
T06D8.2	GO:0003677	molecular_function	DNA binding
T09A5.8	GO:0003677	molecular_function	DNA binding
T10C6.11	GO:0003677	molecular_function	DNA binding
T10C6.12	GO:0003677	molecular_function	DNA binding
T10C6.13	GO:0003677	molecular_function	DNA binding
T10C6.14	GO:0003677	molecular_function	DNA binding
T12A2.8	GO:0003677	molecular_function	DNA binding
T12D8.1	GO:0003677	molecular_function	DNA binding
T12D8.7	GO:0003677	molecular_function	DNA binding
T12F5.3	GO:0003677	molecular_function	DNA binding
T12F5.4	GO:0003677	molecular_function	DNA binding
T13C5.4	GO:0003677	molecular_function	DNA binding
T13F2.2	GO:0003677	molecular_function	DNA binding
T14G8.1	GO:0003677	molecular_function	DNA binding
T15H9.3	GO:0003677	molecular_function	DNA binding
T19B10.6	GO:0003677	molecular_function	DNA binding
T20B12.2	GO:0003677	molecular_function	DNA binding
T20B12.8	GO:0003677	molecular_function	DNA binding
T21G5.3	GO:0003677	molecular_function	DNA binding
T22B7.1	GO:0003677	molecular_function	DNA binding
T22H6.6	GO:0003677	molecular_function	DNA binding
T23D8.5	GO:0003677	molecular_function	DNA binding
T23D8.6	GO:0003677	molecular_function	DNA binding
T23D8.8	GO:0003677	molecular_function	DNA binding
T23H2.3	GO:0003677	molecular_function	DNA binding
T23H4.2	GO:0003677	molecular_function	DNA binding
T24B8.6	GO:0003677	molecular_function	DNA binding
T24H10.1	GO:0003677	molecular_function	DNA binding
T26A5.8	GO:0003677	molecular_function	DNA binding
T27C4.4	GO:0003677	molecular_function	DNA binding
T28F12.2	GO:0003677	molecular_function	DNA binding
W01G7.3	GO:0003677	molecular_function	DNA binding
W02D9.3	GO:0003677	molecular_function	DNA binding
W02H5.4	GO:0003677	molecular_function	DNA binding
W03A3.1	GO:0003677	molecular_function	DNA binding
W03A3.2	GO:0003677	molecular_function	DNA binding
W03D2.4	GO:0003677	molecular_function	DNA binding
W04A8.7	GO:0003677	molecular_function	DNA binding
W05B10.1	GO:0003677	molecular_function	DNA binding
W05B5.3	GO:0003677	molecular_function	DNA binding
W05E10.3	GO:0003677	molecular_function	DNA binding
W06D4.6	GO:0003677	molecular_function	DNA binding
W09B6.2	GO:0003677	molecular_function	DNA binding
W09C3.4	GO:0003677	molecular_function	DNA binding
W10C8.2	GO:0003677	molecular_function	DNA binding
W10D9.4	GO:0003677	molecular_function	DNA binding
Y104H12A.1	GO:0003677	molecular_function	DNA binding
Y105E8A.23	GO:0003677	molecular_function	DNA binding
Y108G3AL.7	GO:0003677	molecular_function	DNA binding
Y111B2A.22	GO:0003677	molecular_function	DNA binding
Y113G7A.6	GO:0003677	molecular_function	DNA binding
Y113G7B.14	GO:0003677	molecular_function	DNA binding
Y113G7B.23	GO:0003677	molecular_function	DNA binding
Y116A8C.13	GO:0003677	molecular_function	DNA binding
Y15E3A.1	GO:0003677	molecular_function	DNA binding
Y16B4A.1	GO:0003677	molecular_function	DNA binding
Y17G7B.5	GO:0003677	molecular_function	DNA binding
Y37B11A.2	GO:0003677	molecular_function	DNA binding
Y37E3.3	GO:0003677	molecular_function	DNA binding
Y38A10A.6	GO:0003677	molecular_function	DNA binding
Y39A1A.5	GO:0003677	molecular_function	DNA binding
Y39A1C.3	GO:0003677	molecular_function	DNA binding
Y39G10AR.14	GO:0003677	molecular_function	DNA binding
Y41C4A.14	GO:0003677	molecular_function	DNA binding
Y41C4A.4	GO:0003677	molecular_function	DNA binding
Y45F10D.7	GO:0003677	molecular_function	DNA binding
Y46G5A.4	GO:0003677	molecular_function	DNA binding
Y47D3A.29	GO:0003677	molecular_function	DNA binding
Y47D3A.4	GO:0003677	molecular_function	DNA binding
Y47G6A.11	GO:0003677	molecular_function	DNA binding
Y47G6A.8	GO:0003677	molecular_function	DNA binding
Y48B6A.14	GO:0003677	molecular_function	DNA binding
Y48C3A.14	GO:0003677	molecular_function	DNA binding
Y48E1A.1	GO:0003677	molecular_function	DNA binding
Y48G1C.6	GO:0003677	molecular_function	DNA binding
Y48G8AL.6	GO:0003677	molecular_function	DNA binding
Y49E10.6	GO:0003677	molecular_function	DNA binding
Y50D7A.11	GO:0003677	molecular_function	DNA binding
Y50D7A.2	GO:0003677	molecular_function	DNA binding
Y53C12C.1	GO:0003677	molecular_function	DNA binding
Y53F4B.3	GO:0003677	molecular_function	DNA binding
Y54E2A.4	GO:0003677	molecular_function	DNA binding
Y54F10AM.4	GO:0003677	molecular_function	DNA binding
Y55B1AL.2	GO:0003677	molecular_function	DNA binding
Y55B1AL.3	GO:0003677	molecular_function	DNA binding
Y56A3A.27	GO:0003677	molecular_function	DNA binding
Y56A3A.4	GO:0003677	molecular_function	DNA binding
Y57A10A.15	GO:0003677	molecular_function	DNA binding
Y66D12A.15	GO:0003677	molecular_function	DNA binding
Y71F9AL.18	GO:0003677	molecular_function	DNA binding
Y71H2AM.17	GO:0003677	molecular_function	DNA binding
Y73B6BL.9	GO:0003677	molecular_function	DNA binding
Y74C9A.4	GO:0003677	molecular_function	DNA binding
Y75B8A.1	GO:0003677	molecular_function	DNA binding
Y75B8A.2	GO:0003677	molecular_function	DNA binding
Y77E11A.6	GO:0003677	molecular_function	DNA binding
Y80D3A.3	GO:0003677	molecular_function	DNA binding
Y97E10AR.5	GO:0003677	molecular_function	DNA binding
ZC123.3	GO:0003677	molecular_function	DNA binding
ZC204.2	GO:0003677	molecular_function	DNA binding
ZC247.3	GO:0003677	molecular_function	DNA binding
ZC317.1	GO:0003677	molecular_function	DNA binding
ZC64.3	GO:0003677	molecular_function	DNA binding
ZC64.4	GO:0003677	molecular_function	DNA binding
ZK1127.7	GO:0003677	molecular_function	DNA binding
ZK1251.1	GO:0003677	molecular_function	DNA binding
ZK131.1	GO:0003677	molecular_function	DNA binding
ZK131.10	GO:0003677	molecular_function	DNA binding
ZK131.2	GO:0003677	molecular_function	DNA binding
ZK131.3	GO:0003677	molecular_function	DNA binding
ZK131.4	GO:0003677	molecular_function	DNA binding
ZK131.5	GO:0003677	molecular_function	DNA binding
ZK131.6	GO:0003677	molecular_function	DNA binding
ZK131.7	GO:0003677	molecular_function	DNA binding
ZK131.8	GO:0003677	molecular_function	DNA binding
ZK131.9	GO:0003677	molecular_function	DNA binding
ZK1320.12	GO:0003677	molecular_function	DNA binding
ZK265.4	GO:0003677	molecular_function	DNA binding
ZK381.1	GO:0003677	molecular_function	DNA binding
ZK512.2	GO:0003677	molecular_function	DNA binding
ZK593.4	GO:0003677	molecular_function	DNA binding
ZK632.1	GO:0003677	molecular_function	DNA binding
ZK652.5	GO:0003677	molecular_function	DNA binding
ZK686.2	GO:0003677	molecular_function	DNA binding
ZK783.4	GO:0003677	molecular_function	DNA binding
ZK993.1	GO:0003677	molecular_function	DNA binding
C27H6.2	GO:0003678	molecular_function	DNA helicase activity
F46G11.1	GO:0003678	molecular_function	DNA helicase activity
T14G8.1	GO:0003678	molecular_function	DNA helicase activity
T22D1.10	GO:0003678	molecular_function	DNA helicase activity
T20B12.2	GO:0003680	molecular_function	AT DNA binding
F26F12.7	GO:0003682	molecular_function	chromatin binding
F54F2.2	GO:0003682	molecular_function	chromatin binding
H06O01.2	GO:0003682	molecular_function	chromatin binding
K01G5.2	GO:0003682	molecular_function	chromatin binding
K03D10.3	GO:0003682	molecular_function	chromatin binding
K08H2.6	GO:0003682	molecular_function	chromatin binding
K10D2.1	GO:0003682	molecular_function	chromatin binding
M04B2.3	GO:0003682	molecular_function	chromatin binding
T04D1.4	GO:0003682	molecular_function	chromatin binding
T09A5.8	GO:0003682	molecular_function	chromatin binding
T14G8.1	GO:0003682	molecular_function	chromatin binding
VC5.4	GO:0003682	molecular_function	chromatin binding
Y55B1BR.3	GO:0003682	molecular_function	chromatin binding
ZK1236.2	GO:0003682	molecular_function	chromatin binding
C35B1.1	GO:0003684	molecular_function	damaged DNA binding
F08F8.4	GO:0003684	molecular_function	damaged DNA binding
F10G7.4	GO:0003684	molecular_function	damaged DNA binding
F10G8.7	GO:0003684	molecular_function	damaged DNA binding
F22B7.6	GO:0003684	molecular_function	damaged DNA binding
F53A3.2	GO:0003684	molecular_function	damaged DNA binding
F56G4.5	GO:0003684	molecular_function	damaged DNA binding
K07G5.2	GO:0003684	molecular_function	damaged DNA binding
K08A8.3	GO:0003684	molecular_function	damaged DNA binding
Y41C4A.14	GO:0003684	molecular_function	damaged DNA binding
Y43C5A.6	GO:0003684	molecular_function	damaged DNA binding
Y62E10A.5	GO:0003684	molecular_function	damaged DNA binding
Y76B12C.2	GO:0003684	molecular_function	damaged DNA binding
ZK20.3	GO:0003684	molecular_function	damaged DNA binding
ZK675.2	GO:0003684	molecular_function	damaged DNA binding
C54G10.2	GO:0003689	molecular_function	DNA clamp loader activity
F44B9.8	GO:0003689	molecular_function	DNA clamp loader activity
F58F6.4	GO:0003689	molecular_function	DNA clamp loader activity
B0464.7	GO:0003690	molecular_function	double-stranded DNA binding
T19E7.2	GO:0003690	molecular_function	double-stranded DNA binding
W04A8.7	GO:0003690	molecular_function	double-stranded DNA binding
K12H4.8	GO:0003691	molecular_function	double-stranded telomeric DNA binding
F39H2.5	GO:0003697	molecular_function	single-stranded DNA binding
PAR2.1	GO:0003697	molecular_function	single-stranded DNA binding
Y43C5A.6	GO:0003697	molecular_function	single-stranded DNA binding
Y48C3A.8	GO:0003697	molecular_function	single-stranded DNA binding
B0286.5	GO:0003700	molecular_function	transcription factor activity
B0414.2	GO:0003700	molecular_function	transcription factor activity
B0564.10	GO:0003700	molecular_function	transcription factor activity
C01H6.5	GO:0003700	molecular_function	transcription factor activity
C04A2.3	GO:0003700	molecular_function	transcription factor activity
C04F1.3	GO:0003700	molecular_function	transcription factor activity
C04G2.7	GO:0003700	molecular_function	transcription factor activity
C07A12.3	GO:0003700	molecular_function	transcription factor activity
C07G2.2	GO:0003700	molecular_function	transcription factor activity
C07H6.7	GO:0003700	molecular_function	transcription factor activity
C08C3.3	GO:0003700	molecular_function	transcription factor activity
C08F8.8	GO:0003700	molecular_function	transcription factor activity
C09G12.1	GO:0003700	molecular_function	transcription factor activity
C10G8.7	GO:0003700	molecular_function	transcription factor activity
C13G5.1	GO:0003700	molecular_function	transcription factor activity
C16A3.7	GO:0003700	molecular_function	transcription factor activity
C16C2.1	GO:0003700	molecular_function	transcription factor activity
C17E4.6	GO:0003700	molecular_function	transcription factor activity
C17H12.9	GO:0003700	molecular_function	transcription factor activity
C18B12.3	GO:0003700	molecular_function	transcription factor activity
C24A1.2	GO:0003700	molecular_function	transcription factor activity
C24H11.3	GO:0003700	molecular_function	transcription factor activity
C25A1.11	GO:0003700	molecular_function	transcription factor activity
C27A12.5	GO:0003700	molecular_function	transcription factor activity
C27C12.6	GO:0003700	molecular_function	transcription factor activity
C27D6.4	GO:0003700	molecular_function	transcription factor activity
C28A5.4	GO:0003700	molecular_function	transcription factor activity
C30A5.7	GO:0003700	molecular_function	transcription factor activity
C30G4.7	GO:0003700	molecular_function	transcription factor activity
C33A11.4	GO:0003700	molecular_function	transcription factor activity
C33D12.1	GO:0003700	molecular_function	transcription factor activity
C33D12.7	GO:0003700	molecular_function	transcription factor activity
C34C6.8	GO:0003700	molecular_function	transcription factor activity
C34E10.7	GO:0003700	molecular_function	transcription factor activity
C36F7.1	GO:0003700	molecular_function	transcription factor activity
C37E2.4	GO:0003700	molecular_function	transcription factor activity
C37E2.5	GO:0003700	molecular_function	transcription factor activity
C37F5.1	GO:0003700	molecular_function	transcription factor activity
C38D4.6	GO:0003700	molecular_function	transcription factor activity
C39E6.4	GO:0003700	molecular_function	transcription factor activity
C40H5.5	GO:0003700	molecular_function	transcription factor activity
C42D8.4	GO:0003700	molecular_function	transcription factor activity
C45E1.1	GO:0003700	molecular_function	transcription factor activity
C47G2.2	GO:0003700	molecular_function	transcription factor activity
C48D5.1	GO:0003700	molecular_function	transcription factor activity
C48E7.11	GO:0003700	molecular_function	transcription factor activity
C50A2.4	GO:0003700	molecular_function	transcription factor activity
C52B9.2	GO:0003700	molecular_function	transcription factor activity
D1007.1	GO:0003700	molecular_function	transcription factor activity
D1014.8	GO:0003700	molecular_function	transcription factor activity
D1081.2	GO:0003700	molecular_function	transcription factor activity
F10C1.5	GO:0003700	molecular_function	transcription factor activity
F11A1.3	GO:0003700	molecular_function	transcription factor activity
F11C1.6	GO:0003700	molecular_function	transcription factor activity
F14F3.1	GO:0003700	molecular_function	transcription factor activity
F16H11.4	GO:0003700	molecular_function	transcription factor activity
F17A2.5	GO:0003700	molecular_function	transcription factor activity
F17A9.3	GO:0003700	molecular_function	transcription factor activity
F19F10.1	GO:0003700	molecular_function	transcription factor activity
F19F10.5	GO:0003700	molecular_function	transcription factor activity
F21H11.3	GO:0003700	molecular_function	transcription factor activity
F22A3.1	GO:0003700	molecular_function	transcription factor activity
F22A3.5	GO:0003700	molecular_function	transcription factor activity
F25E2.5	GO:0003700	molecular_function	transcription factor activity
F26B1.7	GO:0003700	molecular_function	transcription factor activity
F26C11.2	GO:0003700	molecular_function	transcription factor activity
F26D12.1	GO:0003700	molecular_function	transcription factor activity
F27E5.2	GO:0003700	molecular_function	transcription factor activity
F28B12.2	GO:0003700	molecular_function	transcription factor activity
F28F9.1	GO:0003700	molecular_function	transcription factor activity
F29F11.5	GO:0003700	molecular_function	transcription factor activity
F29G9.4	GO:0003700	molecular_function	transcription factor activity
F31E3.1	GO:0003700	molecular_function	transcription factor activity
F31E8.3	GO:0003700	molecular_function	transcription factor activity
F33D11.4	GO:0003700	molecular_function	transcription factor activity
F33D4.1	GO:0003700	molecular_function	transcription factor activity
F34D10.5	GO:0003700	molecular_function	transcription factor activity
F38A6.1	GO:0003700	molecular_function	transcription factor activity
F38A6.3	GO:0003700	molecular_function	transcription factor activity
F40H3.4	GO:0003700	molecular_function	transcription factor activity
F43G9.12	GO:0003700	molecular_function	transcription factor activity
F44A6.2	GO:0003700	molecular_function	transcription factor activity
F45E6.2	GO:0003700	molecular_function	transcription factor activity
F46C8.5	GO:0003700	molecular_function	transcription factor activity
F46F3.1	GO:0003700	molecular_function	transcription factor activity
F49E12.6	GO:0003700	molecular_function	transcription factor activity
F52C12.5	GO:0003700	molecular_function	transcription factor activity
F52F12.6	GO:0003700	molecular_function	transcription factor activity
F54A5.1	GO:0003700	molecular_function	transcription factor activity
F54H5.4	GO:0003700	molecular_function	transcription factor activity
F55A8.1	GO:0003700	molecular_function	transcription factor activity
F55B12.1	GO:0003700	molecular_function	transcription factor activity
F55D12.4	GO:0003700	molecular_function	transcription factor activity
F56E3.4	GO:0003700	molecular_function	transcription factor activity
F57B10.1	GO:0003700	molecular_function	transcription factor activity
F58A3.1	GO:0003700	molecular_function	transcription factor activity
F58E6.10	GO:0003700	molecular_function	transcription factor activity
H14A12.4	GO:0003700	molecular_function	transcription factor activity
K02B12.1	GO:0003700	molecular_function	transcription factor activity
K03A11.3	GO:0003700	molecular_function	transcription factor activity
K03E6.1	GO:0003700	molecular_function	transcription factor activity
K06A1.1	GO:0003700	molecular_function	transcription factor activity
K08B4.1	GO:0003700	molecular_function	transcription factor activity
K08F8.2	GO:0003700	molecular_function	transcription factor activity
K10C3.6	GO:0003700	molecular_function	transcription factor activity
K10G6.1	GO:0003700	molecular_function	transcription factor activity
K11G9.4	GO:0003700	molecular_function	transcription factor activity
M142.4	GO:0003700	molecular_function	transcription factor activity
M6.3	GO:0003700	molecular_function	transcription factor activity
R03C1.3	GO:0003700	molecular_function	transcription factor activity
R05D11.1	GO:0003700	molecular_function	transcription factor activity
R07B1.1	GO:0003700	molecular_function	transcription factor activity
R07H5.10	GO:0003700	molecular_function	transcription factor activity
R08B4.2	GO:0003700	molecular_function	transcription factor activity
R119.6	GO:0003700	molecular_function	transcription factor activity
R11E3.6	GO:0003700	molecular_function	transcription factor activity
R12B2.1	GO:0003700	molecular_function	transcription factor activity
R13A5.5	GO:0003700	molecular_function	transcription factor activity
R13F6.9	GO:0003700	molecular_function	transcription factor activity
R13H8.1	GO:0003700	molecular_function	transcription factor activity
R53.3	GO:0003700	molecular_function	transcription factor activity
R74.3	GO:0003700	molecular_function	transcription factor activity
T01B10.4	GO:0003700	molecular_function	transcription factor activity
T08D10.1	GO:0003700	molecular_function	transcription factor activity
T08H4.3	GO:0003700	molecular_function	transcription factor activity
T13C5.4	GO:0003700	molecular_function	transcription factor activity
T14G12.4	GO:0003700	molecular_function	transcription factor activity
T18D3.7	GO:0003700	molecular_function	transcription factor activity
T19B10.11	GO:0003700	molecular_function	transcription factor activity
T19E7.2	GO:0003700	molecular_function	transcription factor activity
T20B12.2	GO:0003700	molecular_function	transcription factor activity
T20F5.3	GO:0003700	molecular_function	transcription factor activity
T22B7.1	GO:0003700	molecular_function	transcription factor activity
T23C6.5	GO:0003700	molecular_function	transcription factor activity
T23G7.1	GO:0003700	molecular_function	transcription factor activity
T23H4.2	GO:0003700	molecular_function	transcription factor activity
T27A1.6	GO:0003700	molecular_function	transcription factor activity
T27C4.4	GO:0003700	molecular_function	transcription factor activity
T28F12.2	GO:0003700	molecular_function	transcription factor activity
T28H11.4	GO:0003700	molecular_function	transcription factor activity
W02H5.7	GO:0003700	molecular_function	transcription factor activity
W03A3.1	GO:0003700	molecular_function	transcription factor activity
W05B5.3	GO:0003700	molecular_function	transcription factor activity
W05E10.3	GO:0003700	molecular_function	transcription factor activity
W07G1.3	GO:0003700	molecular_function	transcription factor activity
W09C2.1	GO:0003700	molecular_function	transcription factor activity
W10D5.1	GO:0003700	molecular_function	transcription factor activity
Y102A5C.18	GO:0003700	molecular_function	transcription factor activity
Y104H12A.1	GO:0003700	molecular_function	transcription factor activity
Y113G7A.6	GO:0003700	molecular_function	transcription factor activity
Y15E3A.1	GO:0003700	molecular_function	transcription factor activity
Y41C4A.4	GO:0003700	molecular_function	transcription factor activity
Y44E3B.1	GO:0003700	molecular_function	transcription factor activity
Y47D3A.12	GO:0003700	molecular_function	transcription factor activity
Y48C3A.12	GO:0003700	molecular_function	transcription factor activity
Y48C3A.17	GO:0003700	molecular_function	transcription factor activity
Y51H4A.17	GO:0003700	molecular_function	transcription factor activity
Y51H4A.4	GO:0003700	molecular_function	transcription factor activity
Y53C10A.12	GO:0003700	molecular_function	transcription factor activity
Y53C12C.1	GO:0003700	molecular_function	transcription factor activity
Y53H1A.5	GO:0003700	molecular_function	transcription factor activity
Y54F10AM.4	GO:0003700	molecular_function	transcription factor activity
Y74C9A.4	GO:0003700	molecular_function	transcription factor activity
Y75B8A.1	GO:0003700	molecular_function	transcription factor activity
Y75B8A.2	GO:0003700	molecular_function	transcription factor activity
Y80D3A.3	GO:0003700	molecular_function	transcription factor activity
ZC123.3	GO:0003700	molecular_function	transcription factor activity
ZC204.2	GO:0003700	molecular_function	transcription factor activity
ZC247.3	GO:0003700	molecular_function	transcription factor activity
ZC64.3	GO:0003700	molecular_function	transcription factor activity
ZC64.4	GO:0003700	molecular_function	transcription factor activity
ZK1290.4	GO:0003700	molecular_function	transcription factor activity
ZK265.4	GO:0003700	molecular_function	transcription factor activity
ZK328.8	GO:0003700	molecular_function	transcription factor activity
ZK370.2	GO:0003700	molecular_function	transcription factor activity
ZK652.5	GO:0003700	molecular_function	transcription factor activity
ZK909.4	GO:0003700	molecular_function	transcription factor activity
ZK993.1	GO:0003700	molecular_function	transcription factor activity
B0336.13	GO:0003702	molecular_function	RNA polymerase II transcription factor activity
C14A4.10	GO:0003702	molecular_function	RNA polymerase II transcription factor activity
C38D4.6	GO:0003702	molecular_function	RNA polymerase II transcription factor activity
F39H11.2	GO:0003702	molecular_function	RNA polymerase II transcription factor activity
F43D9.5	GO:0003702	molecular_function	RNA polymerase II transcription factor activity
F48D6.1	GO:0003702	molecular_function	RNA polymerase II transcription factor activity
F54D5.11	GO:0003702	molecular_function	RNA polymerase II transcription factor activity
F54F7.1	GO:0003702	molecular_function	RNA polymerase II transcription factor activity
K03B4.3	GO:0003702	molecular_function	RNA polymerase II transcription factor activity
K10D3.3	GO:0003702	molecular_function	RNA polymerase II transcription factor activity
K11D12.2	GO:0003702	molecular_function	RNA polymerase II transcription factor activity
T20B12.2	GO:0003702	molecular_function	RNA polymerase II transcription factor activity
T24H10.1	GO:0003702	molecular_function	RNA polymerase II transcription factor activity
W09B6.2	GO:0003702	molecular_function	RNA polymerase II transcription factor activity
W10C8.2	GO:0003702	molecular_function	RNA polymerase II transcription factor activity
Y111B2A.13	GO:0003702	molecular_function	RNA polymerase II transcription factor activity
Y37E11AL.8	GO:0003702	molecular_function	RNA polymerase II transcription factor activity
Y39B6A.36	GO:0003702	molecular_function	RNA polymerase II transcription factor activity
Y73F8A.24	GO:0003702	molecular_function	RNA polymerase II transcription factor activity
ZK550.4	GO:0003702	molecular_function	RNA polymerase II transcription factor activity
C18A3.8	GO:0003704	molecular_function	specific RNA polymerase II transcription factor activity
F46F3.1	GO:0003704	molecular_function	specific RNA polymerase II transcription factor activity
F55B12.1	GO:0003704	molecular_function	specific RNA polymerase II transcription factor activity
K03A11.3	GO:0003704	molecular_function	specific RNA polymerase II transcription factor activity
T24B8.6	GO:0003704	molecular_function	specific RNA polymerase II transcription factor activity
W09C2.1	GO:0003704	molecular_function	specific RNA polymerase II transcription factor activity
B0304.1	GO:0003705	molecular_function	RNA polymerase II transcription factor activity, enhancer binding
C38D4.6	GO:0003705	molecular_function	RNA polymerase II transcription factor activity, enhancer binding
F21H11.3	GO:0003705	molecular_function	RNA polymerase II transcription factor activity, enhancer binding
T15H9.3	GO:0003705	molecular_function	RNA polymerase II transcription factor activity, enhancer binding
T19E7.2	GO:0003705	molecular_function	RNA polymerase II transcription factor activity, enhancer binding
ZK328.8	GO:0003705	molecular_function	RNA polymerase II transcription factor activity, enhancer binding
C01H6.5	GO:0003707	molecular_function	steroid hormone receptor activity
C07A12.3	GO:0003707	molecular_function	steroid hormone receptor activity
C08F8.8	GO:0003707	molecular_function	steroid hormone receptor activity
C45E1.1	GO:0003707	molecular_function	steroid hormone receptor activity
C48D5.1	GO:0003707	molecular_function	steroid hormone receptor activity
F11A1.3	GO:0003707	molecular_function	steroid hormone receptor activity
F11C1.6	GO:0003707	molecular_function	steroid hormone receptor activity
F33D4.1	GO:0003707	molecular_function	steroid hormone receptor activity
F44A6.2	GO:0003707	molecular_function	steroid hormone receptor activity
F55D12.4	GO:0003707	molecular_function	steroid hormone receptor activity
F56E3.4	GO:0003707	molecular_function	steroid hormone receptor activity
K10C3.6	GO:0003707	molecular_function	steroid hormone receptor activity
T01B10.4	GO:0003707	molecular_function	steroid hormone receptor activity
T23H4.2	GO:0003707	molecular_function	steroid hormone receptor activity
W05B5.3	GO:0003707	molecular_function	steroid hormone receptor activity
Y104H12A.1	GO:0003707	molecular_function	steroid hormone receptor activity
Y15E3A.1	GO:0003707	molecular_function	steroid hormone receptor activity
K08E4.1	GO:0003711	molecular_function	transcription elongation regulator activity
T04A8.14	GO:0003711	molecular_function	transcription elongation regulator activity
T24H10.1	GO:0003711	molecular_function	transcription elongation regulator activity
F58A3.1	GO:0003712	molecular_function	transcription cofactor activity
K03H1.10	GO:0003712	molecular_function	transcription cofactor activity
R10E11.1	GO:0003712	molecular_function	transcription cofactor activity
C54D1.6	GO:0003713	molecular_function	transcription coactivator activity
F54F7.1	GO:0003713	molecular_function	transcription coactivator activity
K05C4.6	GO:0003713	molecular_function	transcription coactivator activity
R12B2.5	GO:0003713	molecular_function	transcription coactivator activity
T13F2.2	GO:0003713	molecular_function	transcription coactivator activity
C10E2.3	GO:0003714	molecular_function	transcription corepressor activity
C53A5.3	GO:0003714	molecular_function	transcription corepressor activity
R06C1.1	GO:0003714	molecular_function	transcription corepressor activity
W02D3.9	GO:0003714	molecular_function	transcription corepressor activity
B0024.11	GO:0003723	molecular_function	RNA binding
B0273.2	GO:0003723	molecular_function	RNA binding
B0280.17	GO:0003723	molecular_function	RNA binding
B0336.9	GO:0003723	molecular_function	RNA binding
B0348.6	GO:0003723	molecular_function	RNA binding
B0564.1	GO:0003723	molecular_function	RNA binding
BE0003N10.1	GO:0003723	molecular_function	RNA binding
C04G2.6	GO:0003723	molecular_function	RNA binding
C05D9.5	GO:0003723	molecular_function	RNA binding
C07H6.4	GO:0003723	molecular_function	RNA binding
C08H9.2	GO:0003723	molecular_function	RNA binding
C11D2.6	GO:0003723	molecular_function	RNA binding
C11D2.7	GO:0003723	molecular_function	RNA binding
C12D8.1	GO:0003723	molecular_function	RNA binding
C12D8.11	GO:0003723	molecular_function	RNA binding
C14A4.5	GO:0003723	molecular_function	RNA binding
C15C6.4	GO:0003723	molecular_function	RNA binding
C23G10.3	GO:0003723	molecular_function	RNA binding
C23H3.3	GO:0003723	molecular_function	RNA binding
C30G12.7	GO:0003723	molecular_function	RNA binding
C33H5.12	GO:0003723	molecular_function	RNA binding
C36E6.1	GO:0003723	molecular_function	RNA binding
C43E11.9	GO:0003723	molecular_function	RNA binding
C44B7.2	GO:0003723	molecular_function	RNA binding
C44E4.4	GO:0003723	molecular_function	RNA binding
C47D2.2	GO:0003723	molecular_function	RNA binding
C48B6.2	GO:0003723	molecular_function	RNA binding
C49H3.11	GO:0003723	molecular_function	RNA binding
C56G2.1	GO:0003723	molecular_function	RNA binding
D1037.1	GO:0003723	molecular_function	RNA binding
D2089.4	GO:0003723	molecular_function	RNA binding
E02A10.1	GO:0003723	molecular_function	RNA binding
E02D9.1	GO:0003723	molecular_function	RNA binding
E02H1.3	GO:0003723	molecular_function	RNA binding
EEED8.5	GO:0003723	molecular_function	RNA binding
F02A9.4	GO:0003723	molecular_function	RNA binding
F18A11.1	GO:0003723	molecular_function	RNA binding
F18H3.3	GO:0003723	molecular_function	RNA binding
F21H12.5	GO:0003723	molecular_function	RNA binding
F22B5.9	GO:0003723	molecular_function	RNA binding
F26B1.2	GO:0003723	molecular_function	RNA binding
F26E4.10	GO:0003723	molecular_function	RNA binding
F31D4.1	GO:0003723	molecular_function	RNA binding
F33D4.5	GO:0003723	molecular_function	RNA binding
F35H8.5	GO:0003723	molecular_function	RNA binding
F36A2.6	GO:0003723	molecular_function	RNA binding
F37C12.13	GO:0003723	molecular_function	RNA binding
F39E9.7	GO:0003723	molecular_function	RNA binding
F40F8.10	GO:0003723	molecular_function	RNA binding
F43C1.6	GO:0003723	molecular_function	RNA binding
F43G6.5	GO:0003723	molecular_function	RNA binding
F48E8.6	GO:0003723	molecular_function	RNA binding
F49E8.4	GO:0003723	molecular_function	RNA binding
F52B5.6	GO:0003723	molecular_function	RNA binding
F52G2.1	GO:0003723	molecular_function	RNA binding
F53A2.6	GO:0003723	molecular_function	RNA binding
F53F4.11	GO:0003723	molecular_function	RNA binding
F53G12.5	GO:0003723	molecular_function	RNA binding
F54C9.1	GO:0003723	molecular_function	RNA binding
F54C9.8	GO:0003723	molecular_function	RNA binding
F55A4.4	GO:0003723	molecular_function	RNA binding
F55A4.5	GO:0003723	molecular_function	RNA binding
F55B12.4	GO:0003723	molecular_function	RNA binding
F55D10.2	GO:0003723	molecular_function	RNA binding
H06H21.3	GO:0003723	molecular_function	RNA binding
H12I13.4	GO:0003723	molecular_function	RNA binding
JC8.10	GO:0003723	molecular_function	RNA binding
K01G5.5	GO:0003723	molecular_function	RNA binding
K07E8.7	GO:0003723	molecular_function	RNA binding
K07H8.9	GO:0003723	molecular_function	RNA binding
K10C9.3	GO:0003723	molecular_function	RNA binding
K12H4.8	GO:0003723	molecular_function	RNA binding
M01A10.1	GO:0003723	molecular_function	RNA binding
M4.2	GO:0003723	molecular_function	RNA binding
M7.3	GO:0003723	molecular_function	RNA binding
M88.5	GO:0003723	molecular_function	RNA binding
R04A9.4	GO:0003723	molecular_function	RNA binding
R07E5.14	GO:0003723	molecular_function	RNA binding
R11A8.7	GO:0003723	molecular_function	RNA binding
T01C3.7	GO:0003723	molecular_function	RNA binding
T04A8.14	GO:0003723	molecular_function	RNA binding
T05E11.1	GO:0003723	molecular_function	RNA binding
T05G5.10	GO:0003723	molecular_function	RNA binding
T07D4.3	GO:0003723	molecular_function	RNA binding
T10E9.7	GO:0003723	molecular_function	RNA binding
T13H5.7	GO:0003723	molecular_function	RNA binding
T14B4.1	GO:0003723	molecular_function	RNA binding
T15H9.6	GO:0003723	molecular_function	RNA binding
T20H4.4	GO:0003723	molecular_function	RNA binding
T21G5.5	GO:0003723	molecular_function	RNA binding
T23G11.3	GO:0003723	molecular_function	RNA binding
W06B11.2	GO:0003723	molecular_function	RNA binding
W06H3.2	GO:0003723	molecular_function	RNA binding
W07E6.1	GO:0003723	molecular_function	RNA binding
W07E6.4	GO:0003723	molecular_function	RNA binding
Y106G6H.2	GO:0003723	molecular_function	RNA binding
Y116A8C.32	GO:0003723	molecular_function	RNA binding
Y116A8C.34	GO:0003723	molecular_function	RNA binding
Y116A8C.35	GO:0003723	molecular_function	RNA binding
Y119D3B.17	GO:0003723	molecular_function	RNA binding
Y32F6A.3	GO:0003723	molecular_function	RNA binding
Y37E3.10	GO:0003723	molecular_function	RNA binding
Y45F10A.2	GO:0003723	molecular_function	RNA binding
Y45F3A.9	GO:0003723	molecular_function	RNA binding
Y51H7C.11	GO:0003723	molecular_function	RNA binding
Y53C12B.2	GO:0003723	molecular_function	RNA binding
Y53C12B.3	GO:0003723	molecular_function	RNA binding
Y54E10A.6	GO:0003723	molecular_function	RNA binding
Y54E10BR.6	GO:0003723	molecular_function	RNA binding
Y54E2A.11	GO:0003723	molecular_function	RNA binding
Y54E5A.6	GO:0003723	molecular_function	RNA binding
Y54F10AM.2	GO:0003723	molecular_function	RNA binding
Y55F3AM.3	GO:0003723	molecular_function	RNA binding
Y57A10A.30	GO:0003723	molecular_function	RNA binding
Y57G11C.16	GO:0003723	molecular_function	RNA binding
Y57G11C.36	GO:0003723	molecular_function	RNA binding
Y59A8B.10	GO:0003723	molecular_function	RNA binding
Y69A2AR.32	GO:0003723	molecular_function	RNA binding
Y6D11A.1	GO:0003723	molecular_function	RNA binding
Y71F9AL.13	GO:0003723	molecular_function	RNA binding
Y73B6BL.29	GO:0003723	molecular_function	RNA binding
Y73B6BL.38	GO:0003723	molecular_function	RNA binding
Y92C3B.2	GO:0003723	molecular_function	RNA binding
Y94H6A.5	GO:0003723	molecular_function	RNA binding
ZC376.5	GO:0003723	molecular_function	RNA binding
ZK1067.6	GO:0003723	molecular_function	RNA binding
ZK418.9	GO:0003723	molecular_function	RNA binding
ZK792.5	GO:0003723	molecular_function	RNA binding
ZK856.11	GO:0003723	molecular_function	RNA binding
ZK945.3	GO:0003723	molecular_function	RNA binding
ZK973.1	GO:0003723	molecular_function	RNA binding
C07H6.5	GO:0003724	molecular_function	RNA helicase activity
C55B7.1	GO:0003724	molecular_function	RNA helicase activity
T12F5.3	GO:0003724	molecular_function	RNA helicase activity
T21G5.3	GO:0003724	molecular_function	RNA helicase activity
D1037.1	GO:0003725	molecular_function	double-stranded RNA binding
F26E4.10	GO:0003725	molecular_function	double-stranded RNA binding
F39E9.7	GO:0003725	molecular_function	double-stranded RNA binding
F55A4.4	GO:0003725	molecular_function	double-stranded RNA binding
F55A4.5	GO:0003725	molecular_function	double-stranded RNA binding
T07D4.3	GO:0003725	molecular_function	double-stranded RNA binding
T20H4.4	GO:0003725	molecular_function	double-stranded RNA binding
Y54E5A.6	GO:0003725	molecular_function	double-stranded RNA binding
ZK632.2	GO:0003725	molecular_function	double-stranded RNA binding
F53G12.5	GO:0003727	molecular_function	single-stranded RNA binding
T07D1.4	GO:0003727	molecular_function	single-stranded RNA binding
T21G5.5	GO:0003727	molecular_function	single-stranded RNA binding
C17D12.2	GO:0003729	molecular_function	mRNA binding
T22B2.4	GO:0003729	molecular_function	mRNA binding
Y106G6H.2	GO:0003729	molecular_function	mRNA binding
C40H1.1	GO:0003730	molecular_function	mRNA 3'-UTR binding
F18A11.1	GO:0003730	molecular_function	mRNA 3'-UTR binding
F21H12.5	GO:0003730	molecular_function	mRNA 3'-UTR binding
H12I13.4	GO:0003730	molecular_function	mRNA 3'-UTR binding
R06F6.1	GO:0003730	molecular_function	mRNA 3'-UTR binding
T23G11.3	GO:0003730	molecular_function	mRNA 3'-UTR binding
W06B11.2	GO:0003730	molecular_function	mRNA 3'-UTR binding
Y54E10A.4	GO:0003730	molecular_function	mRNA 3'-UTR binding
B0041.4	GO:0003735	molecular_function	structural constituent of ribosome
B0205.11	GO:0003735	molecular_function	structural constituent of ribosome
B0250.1	GO:0003735	molecular_function	structural constituent of ribosome
B0261.4	GO:0003735	molecular_function	structural constituent of ribosome
B0303.15	GO:0003735	molecular_function	structural constituent of ribosome
B0336.10	GO:0003735	molecular_function	structural constituent of ribosome
B0393.1	GO:0003735	molecular_function	structural constituent of ribosome
B0412.4	GO:0003735	molecular_function	structural constituent of ribosome
B0513.3	GO:0003735	molecular_function	structural constituent of ribosome
C03D6.8	GO:0003735	molecular_function	structural constituent of ribosome
C04F12.4	GO:0003735	molecular_function	structural constituent of ribosome
C06B8.8	GO:0003735	molecular_function	structural constituent of ribosome
C09D4.5	GO:0003735	molecular_function	structural constituent of ribosome
C09H10.2	GO:0003735	molecular_function	structural constituent of ribosome
C11D2.6	GO:0003735	molecular_function	structural constituent of ribosome
C14B9.7	GO:0003735	molecular_function	structural constituent of ribosome
C16A3.9	GO:0003735	molecular_function	structural constituent of ribosome
C23G10.3	GO:0003735	molecular_function	structural constituent of ribosome
C26E6.6	GO:0003735	molecular_function	structural constituent of ribosome
C26F1.4	GO:0003735	molecular_function	structural constituent of ribosome
C26F1.9	GO:0003735	molecular_function	structural constituent of ribosome
C27A2.2	GO:0003735	molecular_function	structural constituent of ribosome
C30C11.1	GO:0003735	molecular_function	structural constituent of ribosome
C32E8.2	GO:0003735	molecular_function	structural constituent of ribosome
C33D12.6	GO:0003735	molecular_function	structural constituent of ribosome
C37A2.7	GO:0003735	molecular_function	structural constituent of ribosome
C42C1.14	GO:0003735	molecular_function	structural constituent of ribosome
C49H3.11	GO:0003735	molecular_function	structural constituent of ribosome
C50H2.1	GO:0003735	molecular_function	structural constituent of ribosome
C53H9.1	GO:0003735	molecular_function	structural constituent of ribosome
C54C6.1	GO:0003735	molecular_function	structural constituent of ribosome
CD4.3	GO:0003735	molecular_function	structural constituent of ribosome
D1007.12	GO:0003735	molecular_function	structural constituent of ribosome
E02A10.1	GO:0003735	molecular_function	structural constituent of ribosome
E04A4.8	GO:0003735	molecular_function	structural constituent of ribosome
F07D10.1	GO:0003735	molecular_function	structural constituent of ribosome
F09G8.3	GO:0003735	molecular_function	structural constituent of ribosome
F10B5.1	GO:0003735	molecular_function	structural constituent of ribosome
F10E7.7	GO:0003735	molecular_function	structural constituent of ribosome
F11C1.5	GO:0003735	molecular_function	structural constituent of ribosome
F13B10.2	GO:0003735	molecular_function	structural constituent of ribosome
F13G3.11	GO:0003735	molecular_function	structural constituent of ribosome
F25H2.10	GO:0003735	molecular_function	structural constituent of ribosome
F28C6.7	GO:0003735	molecular_function	structural constituent of ribosome
F28D1.7	GO:0003735	molecular_function	structural constituent of ribosome
F29B9.10	GO:0003735	molecular_function	structural constituent of ribosome
F33D4.5	GO:0003735	molecular_function	structural constituent of ribosome
F36A2.6	GO:0003735	molecular_function	structural constituent of ribosome
F37C12.11	GO:0003735	molecular_function	structural constituent of ribosome
F37C12.4	GO:0003735	molecular_function	structural constituent of ribosome
F37C12.9	GO:0003735	molecular_function	structural constituent of ribosome
F39B2.6	GO:0003735	molecular_function	structural constituent of ribosome
F40F11.1	GO:0003735	molecular_function	structural constituent of ribosome
F40F12.5	GO:0003735	molecular_function	structural constituent of ribosome
F40F8.10	GO:0003735	molecular_function	structural constituent of ribosome
F42C5.8	GO:0003735	molecular_function	structural constituent of ribosome
F43C1.6	GO:0003735	molecular_function	structural constituent of ribosome
F45E12.5	GO:0003735	molecular_function	structural constituent of ribosome
F52B5.6	GO:0003735	molecular_function	structural constituent of ribosome
F53A3.3	GO:0003735	molecular_function	structural constituent of ribosome
F53F4.11	GO:0003735	molecular_function	structural constituent of ribosome
F53G12.10	GO:0003735	molecular_function	structural constituent of ribosome
F54C9.5	GO:0003735	molecular_function	structural constituent of ribosome
F54E7.2	GO:0003735	molecular_function	structural constituent of ribosome
F55D10.2	GO:0003735	molecular_function	structural constituent of ribosome
F56B3.8	GO:0003735	molecular_function	structural constituent of ribosome
F56D1.3	GO:0003735	molecular_function	structural constituent of ribosome
F56E10.4	GO:0003735	molecular_function	structural constituent of ribosome
F56F3.5	GO:0003735	molecular_function	structural constituent of ribosome
F59A3.3	GO:0003735	molecular_function	structural constituent of ribosome
H06I04.4	GO:0003735	molecular_function	structural constituent of ribosome
JC8.3	GO:0003735	molecular_function	structural constituent of ribosome
K11H12.2	GO:0003735	molecular_function	structural constituent of ribosome
K11H3.6	GO:0003735	molecular_function	structural constituent of ribosome
M01F1.2	GO:0003735	molecular_function	structural constituent of ribosome
M01F1.6	GO:0003735	molecular_function	structural constituent of ribosome
M28.5	GO:0003735	molecular_function	structural constituent of ribosome
R11D1.8	GO:0003735	molecular_function	structural constituent of ribosome
R11D1.9	GO:0003735	molecular_function	structural constituent of ribosome
R13A5.8	GO:0003735	molecular_function	structural constituent of ribosome
R151.3	GO:0003735	molecular_function	structural constituent of ribosome
T01C3.6	GO:0003735	molecular_function	structural constituent of ribosome
T01E8.6	GO:0003735	molecular_function	structural constituent of ribosome
T03D8.2	GO:0003735	molecular_function	structural constituent of ribosome
T04A8.11	GO:0003735	molecular_function	structural constituent of ribosome
T05E11.1	GO:0003735	molecular_function	structural constituent of ribosome
T05F1.3	GO:0003735	molecular_function	structural constituent of ribosome
T07A9.11	GO:0003735	molecular_function	structural constituent of ribosome
T08B2.10	GO:0003735	molecular_function	structural constituent of ribosome
T08B2.8	GO:0003735	molecular_function	structural constituent of ribosome
T14B4.2	GO:0003735	molecular_function	structural constituent of ribosome
T22F3.4	GO:0003735	molecular_function	structural constituent of ribosome
T23B12.2	GO:0003735	molecular_function	structural constituent of ribosome
T23B12.3	GO:0003735	molecular_function	structural constituent of ribosome
T24B8.1	GO:0003735	molecular_function	structural constituent of ribosome
W01D2.1	GO:0003735	molecular_function	structural constituent of ribosome
W04D2.5	GO:0003735	molecular_function	structural constituent of ribosome
W06H3.3	GO:0003735	molecular_function	structural constituent of ribosome
W09C5.6	GO:0003735	molecular_function	structural constituent of ribosome
W09D10.3	GO:0003735	molecular_function	structural constituent of ribosome
Y105E8A.16	GO:0003735	molecular_function	structural constituent of ribosome
Y106G6H.3	GO:0003735	molecular_function	structural constituent of ribosome
Y111B2A.17	GO:0003735	molecular_function	structural constituent of ribosome
Y119C1B.4	GO:0003735	molecular_function	structural constituent of ribosome
Y37D8A.18	GO:0003735	molecular_function	structural constituent of ribosome
Y37E3.7	GO:0003735	molecular_function	structural constituent of ribosome
Y37E3.8	GO:0003735	molecular_function	structural constituent of ribosome
Y39A1A.6	GO:0003735	molecular_function	structural constituent of ribosome
Y41D4B.5	GO:0003735	molecular_function	structural constituent of ribosome
Y43B11AR.4	GO:0003735	molecular_function	structural constituent of ribosome
Y45F10D.12	GO:0003735	molecular_function	structural constituent of ribosome
Y48B6A.2	GO:0003735	molecular_function	structural constituent of ribosome
Y48E1B.5	GO:0003735	molecular_function	structural constituent of ribosome
Y48G8AL.8	GO:0003735	molecular_function	structural constituent of ribosome
Y52B11A.9	GO:0003735	molecular_function	structural constituent of ribosome
Y54E10A.7	GO:0003735	molecular_function	structural constituent of ribosome
Y54F10AM.2	GO:0003735	molecular_function	structural constituent of ribosome
Y57G11C.16	GO:0003735	molecular_function	structural constituent of ribosome
Y57G11C.34	GO:0003735	molecular_function	structural constituent of ribosome
Y62E10A.1	GO:0003735	molecular_function	structural constituent of ribosome
Y66H1B.2	GO:0003735	molecular_function	structural constituent of ribosome
Y71A12B.1	GO:0003735	molecular_function	structural constituent of ribosome
Y71F9AL.13	GO:0003735	molecular_function	structural constituent of ribosome
Y92H12BR.8	GO:0003735	molecular_function	structural constituent of ribosome
ZC262.8	GO:0003735	molecular_function	structural constituent of ribosome
ZC434.2	GO:0003735	molecular_function	structural constituent of ribosome
ZK652.4	GO:0003735	molecular_function	structural constituent of ribosome
B0348.6	GO:0003743	molecular_function	translation initiation factor activity
C05D9.5	GO:0003743	molecular_function	translation initiation factor activity
C25H3.4	GO:0003743	molecular_function	translation initiation factor activity
C37C3.2	GO:0003743	molecular_function	translation initiation factor activity
F45E12.2	GO:0003743	molecular_function	translation initiation factor activity
F46B6.6	GO:0003743	molecular_function	translation initiation factor activity
F53A2.6	GO:0003743	molecular_function	translation initiation factor activity
H06H21.3	GO:0003743	molecular_function	translation initiation factor activity
K04G2.1	GO:0003743	molecular_function	translation initiation factor activity
R04A9.4	GO:0003743	molecular_function	translation initiation factor activity
R08D7.3	GO:0003743	molecular_function	translation initiation factor activity
T05G5.10	GO:0003743	molecular_function	translation initiation factor activity
T16G1.11	GO:0003743	molecular_function	translation initiation factor activity
T23D8.4	GO:0003743	molecular_function	translation initiation factor activity
T27F7.3	GO:0003743	molecular_function	translation initiation factor activity
W03F9.5	GO:0003743	molecular_function	translation initiation factor activity
Y37E3.10	GO:0003743	molecular_function	translation initiation factor activity
Y47D3A.21	GO:0003743	molecular_function	translation initiation factor activity
Y54E2A.11	GO:0003743	molecular_function	translation initiation factor activity
Y57A10A.30	GO:0003743	molecular_function	translation initiation factor activity
ZK856.11	GO:0003743	molecular_function	translation initiation factor activity
ZK858.7	GO:0003743	molecular_function	translation initiation factor activity
F17C11.9	GO:0003746	molecular_function	translation elongation factor activity
F29C12.4	GO:0003746	molecular_function	translation elongation factor activity
F31E3.5	GO:0003746	molecular_function	translation elongation factor activity
F54C9.1	GO:0003746	molecular_function	translation elongation factor activity
F54H12.6	GO:0003746	molecular_function	translation elongation factor activity
F55C5.5	GO:0003746	molecular_function	translation elongation factor activity
R03G5.1	GO:0003746	molecular_function	translation elongation factor activity
T05G5.10	GO:0003746	molecular_function	translation elongation factor activity
T24H10.1	GO:0003746	molecular_function	translation elongation factor activity
Y41E3.10	GO:0003746	molecular_function	translation elongation factor activity
Y71H2AM.23	GO:0003746	molecular_function	translation elongation factor activity
R02F2.9	GO:0003747	molecular_function	translation release factor activity
T23B5.4	GO:0003747	molecular_function	translation release factor activity
W03F8.3	GO:0003747	molecular_function	translation release factor activity
B0252.4	GO:0003755	molecular_function	peptidyl-prolyl cis-trans isomerase activity
C34D4.12	GO:0003755	molecular_function	peptidyl-prolyl cis-trans isomerase activity
D1009.2	GO:0003755	molecular_function	peptidyl-prolyl cis-trans isomerase activity
F31C3.1	GO:0003755	molecular_function	peptidyl-prolyl cis-trans isomerase activity
F39H2.2	GO:0003755	molecular_function	peptidyl-prolyl cis-trans isomerase activity
F42G9.2	GO:0003755	molecular_function	peptidyl-prolyl cis-trans isomerase activity
F59E10.2	GO:0003755	molecular_function	peptidyl-prolyl cis-trans isomerase activity
T01B7.4	GO:0003755	molecular_function	peptidyl-prolyl cis-trans isomerase activity
T22F3.12	GO:0003755	molecular_function	peptidyl-prolyl cis-trans isomerase activity
T27D1.1	GO:0003755	molecular_function	peptidyl-prolyl cis-trans isomerase activity
Y116A8C.34	GO:0003755	molecular_function	peptidyl-prolyl cis-trans isomerase activity
Y17G7B.9	GO:0003755	molecular_function	peptidyl-prolyl cis-trans isomerase activity
Y18D10A.25	GO:0003755	molecular_function	peptidyl-prolyl cis-trans isomerase activity
Y49A3A.5	GO:0003755	molecular_function	peptidyl-prolyl cis-trans isomerase activity
Y75B12B.2	GO:0003755	molecular_function	peptidyl-prolyl cis-trans isomerase activity
Y75B12B.5	GO:0003755	molecular_function	peptidyl-prolyl cis-trans isomerase activity
Y87G2A.6	GO:0003755	molecular_function	peptidyl-prolyl cis-trans isomerase activity
ZK520.5	GO:0003755	molecular_function	peptidyl-prolyl cis-trans isomerase activity
C07A12.4	GO:0003756	molecular_function	protein disulfide isomerase activity
C14B1.1	GO:0003756	molecular_function	protein disulfide isomerase activity
C14B9.2	GO:0003756	molecular_function	protein disulfide isomerase activity
H06O01.1	GO:0003756	molecular_function	protein disulfide isomerase activity
C39E9.14	GO:0003774	molecular_function	motor activity
C41G7.2	GO:0003774	molecular_function	motor activity
F07A5.7	GO:0003774	molecular_function	motor activity
F11C3.3	GO:0003774	molecular_function	motor activity
F20G4.3	GO:0003774	molecular_function	motor activity
F29D10.4	GO:0003774	molecular_function	motor activity
F36D4.3	GO:0003774	molecular_function	motor activity
F45G2.2	GO:0003774	molecular_function	motor activity
F46C3.3	GO:0003774	molecular_function	motor activity
F47G6.4	GO:0003774	molecular_function	motor activity
F52B10.1	GO:0003774	molecular_function	motor activity
F56A6.2	GO:0003774	molecular_function	motor activity
F58G4.1	GO:0003774	molecular_function	motor activity
K12F2.1	GO:0003774	molecular_function	motor activity
R06C7.10	GO:0003774	molecular_function	motor activity
T02C12.1	GO:0003774	molecular_function	motor activity
T10H10.1	GO:0003774	molecular_function	motor activity
T18D3.4	GO:0003774	molecular_function	motor activity
Y11D7A.14	GO:0003774	molecular_function	motor activity
Y66H1A.6	GO:0003774	molecular_function	motor activity
C06G3.2	GO:0003777	molecular_function	microtubule motor activity
C18C4.10	GO:0003777	molecular_function	microtubule motor activity
C33H5.4	GO:0003777	molecular_function	microtubule motor activity
C41G7.2	GO:0003777	molecular_function	microtubule motor activity
C52E12.2	GO:0003777	molecular_function	microtubule motor activity
F08F8.3	GO:0003777	molecular_function	microtubule motor activity
F18C12.1	GO:0003777	molecular_function	microtubule motor activity
F20C5.2	GO:0003777	molecular_function	microtubule motor activity
F23B12.8	GO:0003777	molecular_function	microtubule motor activity
F56E3.3	GO:0003777	molecular_function	microtubule motor activity
K11D9.1	GO:0003777	molecular_function	microtubule motor activity
K12F2.2	GO:0003777	molecular_function	microtubule motor activity
M01E11.6	GO:0003777	molecular_function	microtubule motor activity
M02B7.3	GO:0003777	molecular_function	microtubule motor activity
M03D4.1	GO:0003777	molecular_function	microtubule motor activity
M18.2	GO:0003777	molecular_function	microtubule motor activity
M7.2	GO:0003777	molecular_function	microtubule motor activity
R05D3.7	GO:0003777	molecular_function	microtubule motor activity
R144.1	GO:0003777	molecular_function	microtubule motor activity
T01G1.1	GO:0003777	molecular_function	microtubule motor activity
T09A5.2	GO:0003777	molecular_function	microtubule motor activity
T21E12.4	GO:0003777	molecular_function	microtubule motor activity
T26A5.9	GO:0003777	molecular_function	microtubule motor activity
W02B12.7	GO:0003777	molecular_function	microtubule motor activity
Y43F4B.6	GO:0003777	molecular_function	microtubule motor activity
Y50D7A.6	GO:0003777	molecular_function	microtubule motor activity
B0523.5	GO:0003779	molecular_function	actin binding
C04F6.4	GO:0003779	molecular_function	actin binding
C10H11.1	GO:0003779	molecular_function	actin binding
C18E3.6	GO:0003779	molecular_function	actin binding
C38C3.5	GO:0003779	molecular_function	actin binding
C46H11.11	GO:0003779	molecular_function	actin binding
D2024.6	GO:0003779	molecular_function	actin binding
F08F1.8	GO:0003779	molecular_function	actin binding
F09B9.2	GO:0003779	molecular_function	actin binding
F11H8.4	GO:0003779	molecular_function	actin binding
F15D3.1	GO:0003779	molecular_function	actin binding
F38E9.5	GO:0003779	molecular_function	actin binding
F41G4.2	GO:0003779	molecular_function	actin binding
F56E10.2	GO:0003779	molecular_function	actin binding
F58B6.2	GO:0003779	molecular_function	actin binding
K03E6.6	GO:0003779	molecular_function	actin binding
K06A4.3	GO:0003779	molecular_function	actin binding
K08E3.4	GO:0003779	molecular_function	actin binding
K11C4.3	GO:0003779	molecular_function	actin binding
M106.5	GO:0003779	molecular_function	actin binding
M116.5	GO:0003779	molecular_function	actin binding
R31.1	GO:0003779	molecular_function	actin binding
W04D2.1	GO:0003779	molecular_function	actin binding
Y104H12BR.1	GO:0003779	molecular_function	actin binding
Y18D10A.20	GO:0003779	molecular_function	actin binding
Y48G9A.4	GO:0003779	molecular_function	actin binding
Y50D7A.10	GO:0003779	molecular_function	actin binding
Y71G12B.11	GO:0003779	molecular_function	actin binding
Y79H2A.6	GO:0003779	molecular_function	actin binding
ZC416.6	GO:0003779	molecular_function	actin binding
ZK1151.1	GO:0003779	molecular_function	actin binding
ZK370.3	GO:0003779	molecular_function	actin binding
ZK973.6	GO:0003779	molecular_function	actin binding
K06A4.3	GO:0003785	molecular_function	actin monomer binding
C07A12.4	GO:0003810	molecular_function	protein-glutamine gamma-glutamyltransferase activity
C14B1.1	GO:0003810	molecular_function	protein-glutamine gamma-glutamyltransferase activity
H06O01.1	GO:0003810	molecular_function	protein-glutamine gamma-glutamyltransferase activity
B0035.5	GO:0003824	molecular_function	catalytic activity
B0205.6	GO:0003824	molecular_function	catalytic activity
B0222.4	GO:0003824	molecular_function	catalytic activity
B0222.9	GO:0003824	molecular_function	catalytic activity
B0228.7	GO:0003824	molecular_function	catalytic activity
B0250.5	GO:0003824	molecular_function	catalytic activity
B0272.3	GO:0003824	molecular_function	catalytic activity
B0272.4	GO:0003824	molecular_function	catalytic activity
B0280.1	GO:0003824	molecular_function	catalytic activity
B0286.3	GO:0003824	molecular_function	catalytic activity
B0303.3	GO:0003824	molecular_function	catalytic activity
B0334.3	GO:0003824	molecular_function	catalytic activity
B0365.1	GO:0003824	molecular_function	catalytic activity
B0365.3	GO:0003824	molecular_function	catalytic activity
B0464.9	GO:0003824	molecular_function	catalytic activity
C01B10.8	GO:0003824	molecular_function	catalytic activity
C01B10.9	GO:0003824	molecular_function	catalytic activity
C01B4.6	GO:0003824	molecular_function	catalytic activity
C01F1.3	GO:0003824	molecular_function	catalytic activity
C01G10.7	GO:0003824	molecular_function	catalytic activity
C01G12.5	GO:0003824	molecular_function	catalytic activity
C01G12.8	GO:0003824	molecular_function	catalytic activity
C01G6.7	GO:0003824	molecular_function	catalytic activity
C01G8.3	GO:0003824	molecular_function	catalytic activity
C01H6.4	GO:0003824	molecular_function	catalytic activity
C02E7.1	GO:0003824	molecular_function	catalytic activity
C02G6.1	GO:0003824	molecular_function	catalytic activity
C02G6.2	GO:0003824	molecular_function	catalytic activity
C04C3.3	GO:0003824	molecular_function	catalytic activity
C04F6.3	GO:0003824	molecular_function	catalytic activity
C04G6.3	GO:0003824	molecular_function	catalytic activity
C05D11.11	GO:0003824	molecular_function	catalytic activity
C05D11.12	GO:0003824	molecular_function	catalytic activity
C05G5.4	GO:0003824	molecular_function	catalytic activity
C06B3.4	GO:0003824	molecular_function	catalytic activity
C06B3.5	GO:0003824	molecular_function	catalytic activity
C06B8.3	GO:0003824	molecular_function	catalytic activity
C06E4.3	GO:0003824	molecular_function	catalytic activity
C06E4.6	GO:0003824	molecular_function	catalytic activity
C06G3.7	GO:0003824	molecular_function	catalytic activity
C08B6.9	GO:0003824	molecular_function	catalytic activity
C09G9.6	GO:0003824	molecular_function	catalytic activity
C09H5.2	GO:0003824	molecular_function	catalytic activity
C10F3.2	GO:0003824	molecular_function	catalytic activity
C12C8.2	GO:0003824	molecular_function	catalytic activity
C13C4.4	GO:0003824	molecular_function	catalytic activity
C14B9.8	GO:0003824	molecular_function	catalytic activity
C14C11.3	GO:0003824	molecular_function	catalytic activity
C14E2.2	GO:0003824	molecular_function	catalytic activity
C14F11.1	GO:0003824	molecular_function	catalytic activity
C14H10.3	GO:0003824	molecular_function	catalytic activity
C15B12.1	GO:0003824	molecular_function	catalytic activity
C15B12.8	GO:0003824	molecular_function	catalytic activity
C15H11.4	GO:0003824	molecular_function	catalytic activity
C15H9.1	GO:0003824	molecular_function	catalytic activity
C15H9.7	GO:0003824	molecular_function	catalytic activity
C16A3.10	GO:0003824	molecular_function	catalytic activity
C17G1.7	GO:0003824	molecular_function	catalytic activity
C17G10.8	GO:0003824	molecular_function	catalytic activity
C23H3.4	GO:0003824	molecular_function	catalytic activity
C24A3.4	GO:0003824	molecular_function	catalytic activity
C24G6.6	GO:0003824	molecular_function	catalytic activity
C25F6.3	GO:0003824	molecular_function	catalytic activity
C26D10.3	GO:0003824	molecular_function	catalytic activity
C26E6.8	GO:0003824	molecular_function	catalytic activity
C26F1.7	GO:0003824	molecular_function	catalytic activity
C27A12.9	GO:0003824	molecular_function	catalytic activity
C27A7.1	GO:0003824	molecular_function	catalytic activity
C27A7.3	GO:0003824	molecular_function	catalytic activity
C28F5.4	GO:0003824	molecular_function	catalytic activity
C29E4.10	GO:0003824	molecular_function	catalytic activity
C29F3.1	GO:0003824	molecular_function	catalytic activity
C31C9.2	GO:0003824	molecular_function	catalytic activity
C32E12.2	GO:0003824	molecular_function	catalytic activity
C32E8.9	GO:0003824	molecular_function	catalytic activity
C32F10.8	GO:0003824	molecular_function	catalytic activity
C33C12.3	GO:0003824	molecular_function	catalytic activity
C33C12.8	GO:0003824	molecular_function	catalytic activity
C33E10.10	GO:0003824	molecular_function	catalytic activity
C33F10.14	GO:0003824	molecular_function	catalytic activity
C33G3.4	GO:0003824	molecular_function	catalytic activity
C36A4.9	GO:0003824	molecular_function	catalytic activity
C38C6.2	GO:0003824	molecular_function	catalytic activity
C41A3.1	GO:0003824	molecular_function	catalytic activity
C42C1.2	GO:0003824	molecular_function	catalytic activity
C43E11.2	GO:0003824	molecular_function	catalytic activity
C44C1.2	GO:0003824	molecular_function	catalytic activity
C44E4.3	GO:0003824	molecular_function	catalytic activity
C44H4.5	GO:0003824	molecular_function	catalytic activity
C45B11.3	GO:0003824	molecular_function	catalytic activity
C45B11.6	GO:0003824	molecular_function	catalytic activity
C45B2.5	GO:0003824	molecular_function	catalytic activity
C45E5.1	GO:0003824	molecular_function	catalytic activity
C45G3.3	GO:0003824	molecular_function	catalytic activity
C45G9.2	GO:0003824	molecular_function	catalytic activity
C46F11.2	GO:0003824	molecular_function	catalytic activity
C46F4.2	GO:0003824	molecular_function	catalytic activity
C46H11.2	GO:0003824	molecular_function	catalytic activity
C47A10.5	GO:0003824	molecular_function	catalytic activity
C47B2.6	GO:0003824	molecular_function	catalytic activity
C47E12.5	GO:0003824	molecular_function	catalytic activity
C50B6.7	GO:0003824	molecular_function	catalytic activity
C50F7.10	GO:0003824	molecular_function	catalytic activity
C50F7.4	GO:0003824	molecular_function	catalytic activity
C50H11.1	GO:0003824	molecular_function	catalytic activity
C53A3.2	GO:0003824	molecular_function	catalytic activity
C53B4.7	GO:0003824	molecular_function	catalytic activity
C54D2.4	GO:0003824	molecular_function	catalytic activity
C55F2.1	GO:0003824	molecular_function	catalytic activity
C56G2.6	GO:0003824	molecular_function	catalytic activity
D1005.1	GO:0003824	molecular_function	catalytic activity
D1009.1	GO:0003824	molecular_function	catalytic activity
D1014.1	GO:0003824	molecular_function	catalytic activity
D1044.8	GO:0003824	molecular_function	catalytic activity
D1053.1	GO:0003824	molecular_function	catalytic activity
D1054.8	GO:0003824	molecular_function	catalytic activity
D2023.2	GO:0003824	molecular_function	catalytic activity
D2030.8	GO:0003824	molecular_function	catalytic activity
D2085.1	GO:0003824	molecular_function	catalytic activity
D2096.4	GO:0003824	molecular_function	catalytic activity
DC2.5	GO:0003824	molecular_function	catalytic activity
E01F3.1	GO:0003824	molecular_function	catalytic activity
E02H9.5	GO:0003824	molecular_function	catalytic activity
E04F6.15	GO:0003824	molecular_function	catalytic activity
E04F6.7	GO:0003824	molecular_function	catalytic activity
F01F1.12	GO:0003824	molecular_function	catalytic activity
F01G10.1	GO:0003824	molecular_function	catalytic activity
F01G10.2	GO:0003824	molecular_function	catalytic activity
F01G10.3	GO:0003824	molecular_function	catalytic activity
F01G4.2	GO:0003824	molecular_function	catalytic activity
F02C12.2	GO:0003824	molecular_function	catalytic activity
F02C9.3	GO:0003824	molecular_function	catalytic activity
F08C6.2	GO:0003824	molecular_function	catalytic activity
F08F3.4	GO:0003824	molecular_function	catalytic activity
F08F8.7	GO:0003824	molecular_function	catalytic activity
F09E10.3	GO:0003824	molecular_function	catalytic activity
F09E5.3	GO:0003824	molecular_function	catalytic activity
F09F7.4	GO:0003824	molecular_function	catalytic activity
F09G2.8	GO:0003824	molecular_function	catalytic activity
F10F2.2	GO:0003824	molecular_function	catalytic activity
F10G8.9	GO:0003824	molecular_function	catalytic activity
F11A3.1	GO:0003824	molecular_function	catalytic activity
F11A5.12	GO:0003824	molecular_function	catalytic activity
F11E6.1	GO:0003824	molecular_function	catalytic activity
F11G11.13	GO:0003824	molecular_function	catalytic activity
F11H8.1	GO:0003824	molecular_function	catalytic activity
F12E12.11	GO:0003824	molecular_function	catalytic activity
F13D12.2	GO:0003824	molecular_function	catalytic activity
F13H10.5	GO:0003824	molecular_function	catalytic activity
F13H8.10	GO:0003824	molecular_function	catalytic activity
F13H8.9	GO:0003824	molecular_function	catalytic activity
F15E6.6	GO:0003824	molecular_function	catalytic activity
F18E3.7	GO:0003824	molecular_function	catalytic activity
F20H11.3	GO:0003824	molecular_function	catalytic activity
F20H11.5	GO:0003824	molecular_function	catalytic activity
F21C3.3	GO:0003824	molecular_function	catalytic activity
F22B8.6	GO:0003824	molecular_function	catalytic activity
F22B8.7	GO:0003824	molecular_function	catalytic activity
F22F7.1	GO:0003824	molecular_function	catalytic activity
F22F7.2	GO:0003824	molecular_function	catalytic activity
F23B12.6	GO:0003824	molecular_function	catalytic activity
F23H11.3	GO:0003824	molecular_function	catalytic activity
F25B4.6	GO:0003824	molecular_function	catalytic activity
F25B5.5	GO:0003824	molecular_function	catalytic activity
F25C8.2	GO:0003824	molecular_function	catalytic activity
F25C8.4	GO:0003824	molecular_function	catalytic activity
F25D1.1	GO:0003824	molecular_function	catalytic activity
F25D1.5	GO:0003824	molecular_function	catalytic activity
F25G6.5	GO:0003824	molecular_function	catalytic activity
F25H5.3	GO:0003824	molecular_function	catalytic activity
F25H9.6	GO:0003824	molecular_function	catalytic activity
F26D10.9	GO:0003824	molecular_function	catalytic activity
F26D2.15	GO:0003824	molecular_function	catalytic activity
F26H9.5	GO:0003824	molecular_function	catalytic activity
F27D4.5	GO:0003824	molecular_function	catalytic activity
F27D9.5	GO:0003824	molecular_function	catalytic activity
F27D9.6	GO:0003824	molecular_function	catalytic activity
F28A10.10	GO:0003824	molecular_function	catalytic activity
F28B3.1	GO:0003824	molecular_function	catalytic activity
F28C6.4	GO:0003824	molecular_function	catalytic activity
F28D1.9	GO:0003824	molecular_function	catalytic activity
F28F8.2	GO:0003824	molecular_function	catalytic activity
F28H6.3	GO:0003824	molecular_function	catalytic activity
F28H7.2	GO:0003824	molecular_function	catalytic activity
F29F11.1	GO:0003824	molecular_function	catalytic activity
F29G9.6	GO:0003824	molecular_function	catalytic activity
F32A5.8	GO:0003824	molecular_function	catalytic activity
F32B5.1	GO:0003824	molecular_function	catalytic activity
F32B6.2	GO:0003824	molecular_function	catalytic activity
F32D1.5	GO:0003824	molecular_function	catalytic activity
F32D8.12	GO:0003824	molecular_function	catalytic activity
F32H2.5	GO:0003824	molecular_function	catalytic activity
F33A8.6	GO:0003824	molecular_function	catalytic activity
F33H1.2	GO:0003824	molecular_function	catalytic activity
F35B12.2	GO:0003824	molecular_function	catalytic activity
F35G2.2	GO:0003824	molecular_function	catalytic activity
F36A2.2	GO:0003824	molecular_function	catalytic activity
F36H2.1	GO:0003824	molecular_function	catalytic activity
F36H9.3	GO:0003824	molecular_function	catalytic activity
F37C12.7	GO:0003824	molecular_function	catalytic activity
F37C4.6	GO:0003824	molecular_function	catalytic activity
F38B6.4	GO:0003824	molecular_function	catalytic activity
F38H4.8	GO:0003824	molecular_function	catalytic activity
F39B2.3	GO:0003824	molecular_function	catalytic activity
F41C3.3	GO:0003824	molecular_function	catalytic activity
F41E6.5	GO:0003824	molecular_function	catalytic activity
F42D1.2	GO:0003824	molecular_function	catalytic activity
F42G8.6	GO:0003824	molecular_function	catalytic activity
F42G9.1	GO:0003824	molecular_function	catalytic activity
F43C1.1	GO:0003824	molecular_function	catalytic activity
F43H9.2	GO:0003824	molecular_function	catalytic activity
F44E7.2	GO:0003824	molecular_function	catalytic activity
F44E7.4	GO:0003824	molecular_function	catalytic activity
F44G3.2	GO:0003824	molecular_function	catalytic activity
F45F2.9	GO:0003824	molecular_function	catalytic activity
F45G2.3	GO:0003824	molecular_function	catalytic activity
F46E10.1	GO:0003824	molecular_function	catalytic activity
F46E10.10	GO:0003824	molecular_function	catalytic activity
F46H5.3	GO:0003824	molecular_function	catalytic activity
F47B10.1	GO:0003824	molecular_function	catalytic activity
F47G4.3	GO:0003824	molecular_function	catalytic activity
F49E10.5	GO:0003824	molecular_function	catalytic activity
F49E2.1	GO:0003824	molecular_function	catalytic activity
F49H6.5	GO:0003824	molecular_function	catalytic activity
F52B11.2	GO:0003824	molecular_function	catalytic activity
F52H2.6	GO:0003824	molecular_function	catalytic activity
[truncated: 9,688 more rows]
